# Supplementary material for: Gene association analysis to determine the causal relationship between immune cells and juvenile idiopathic arthritis
Source: PubMed Central journal article supplement (PMC10921670; doi:10.1186/s12969-024-00970-8), 2024-03-08

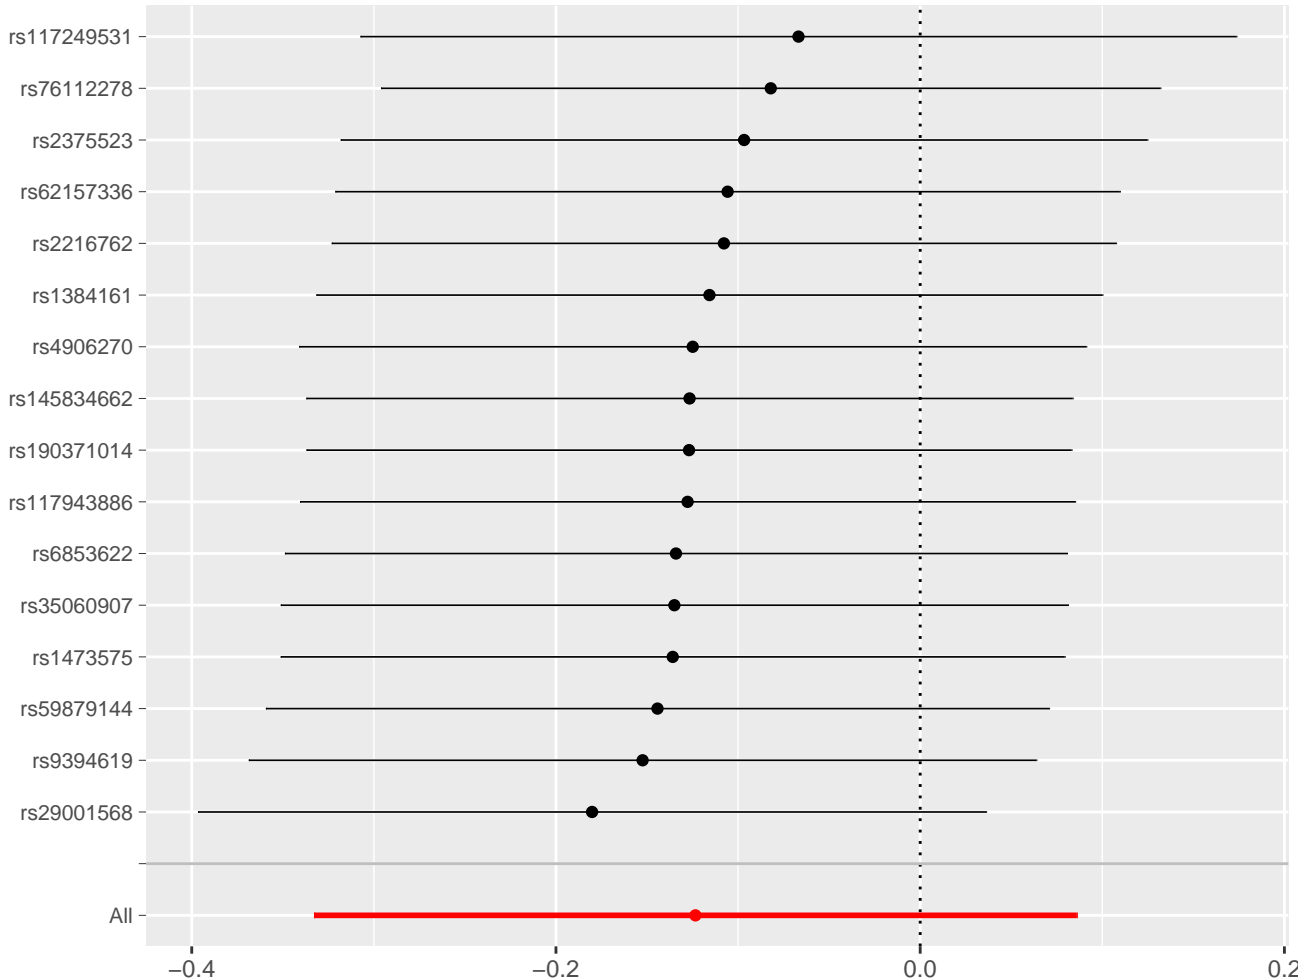

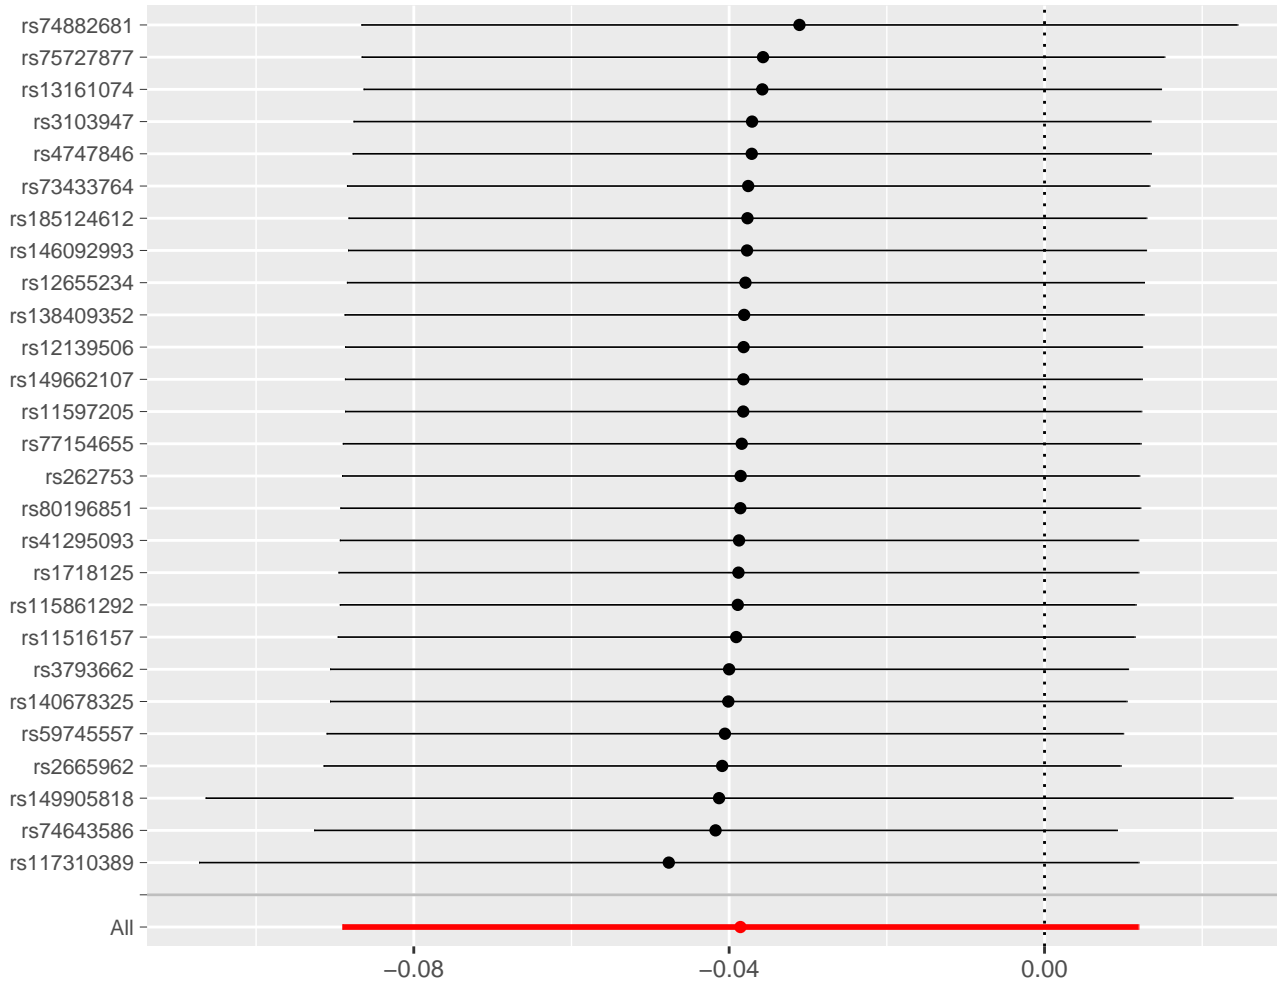

MR leave-one-out sensitivity analysis for 'CD25 on IgD+ CD38-' on 'Juvenile arthritis'

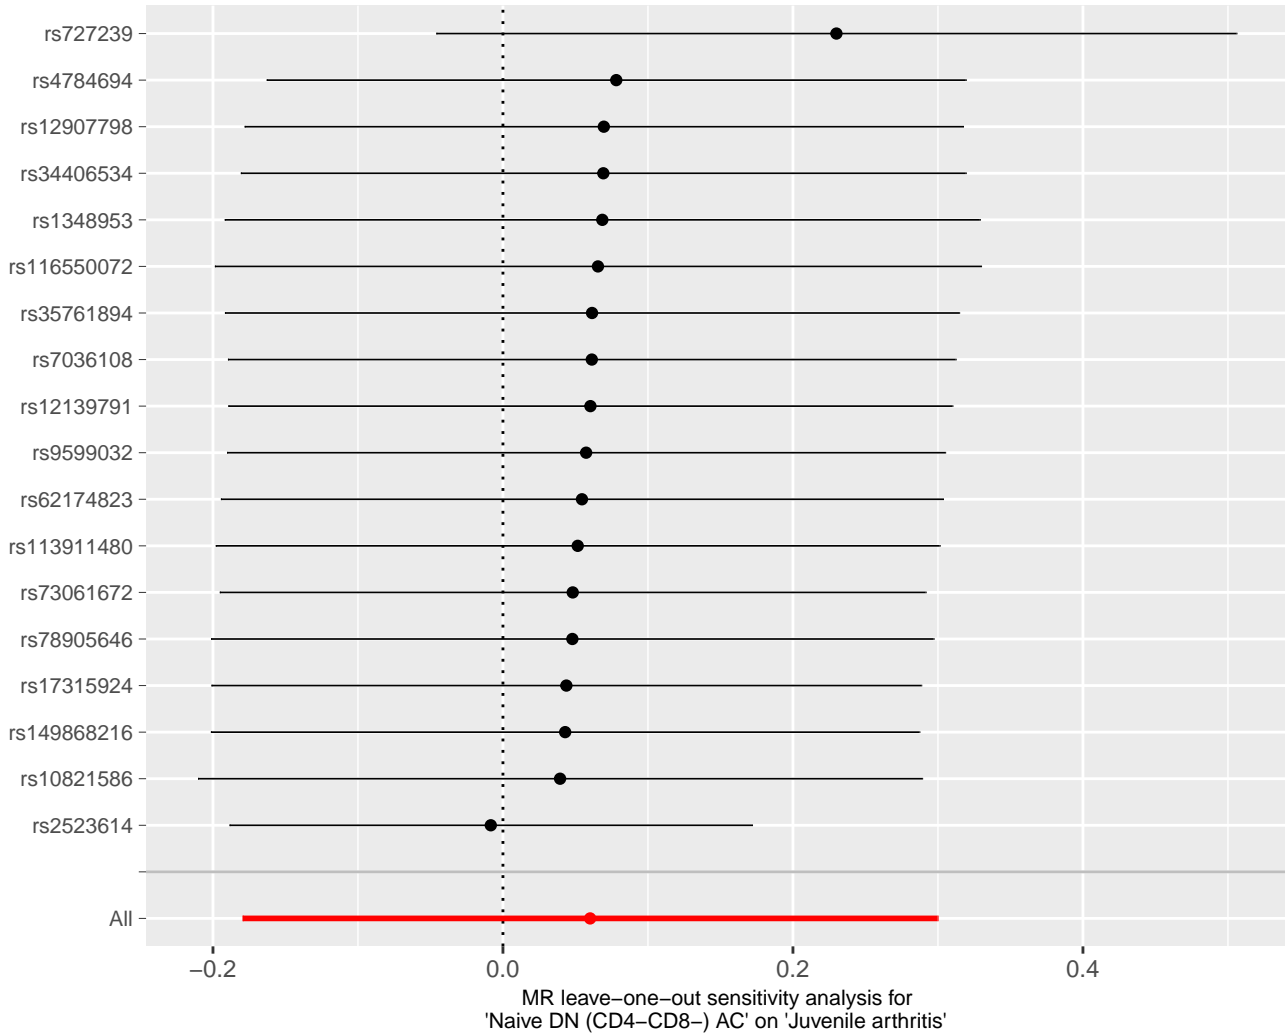

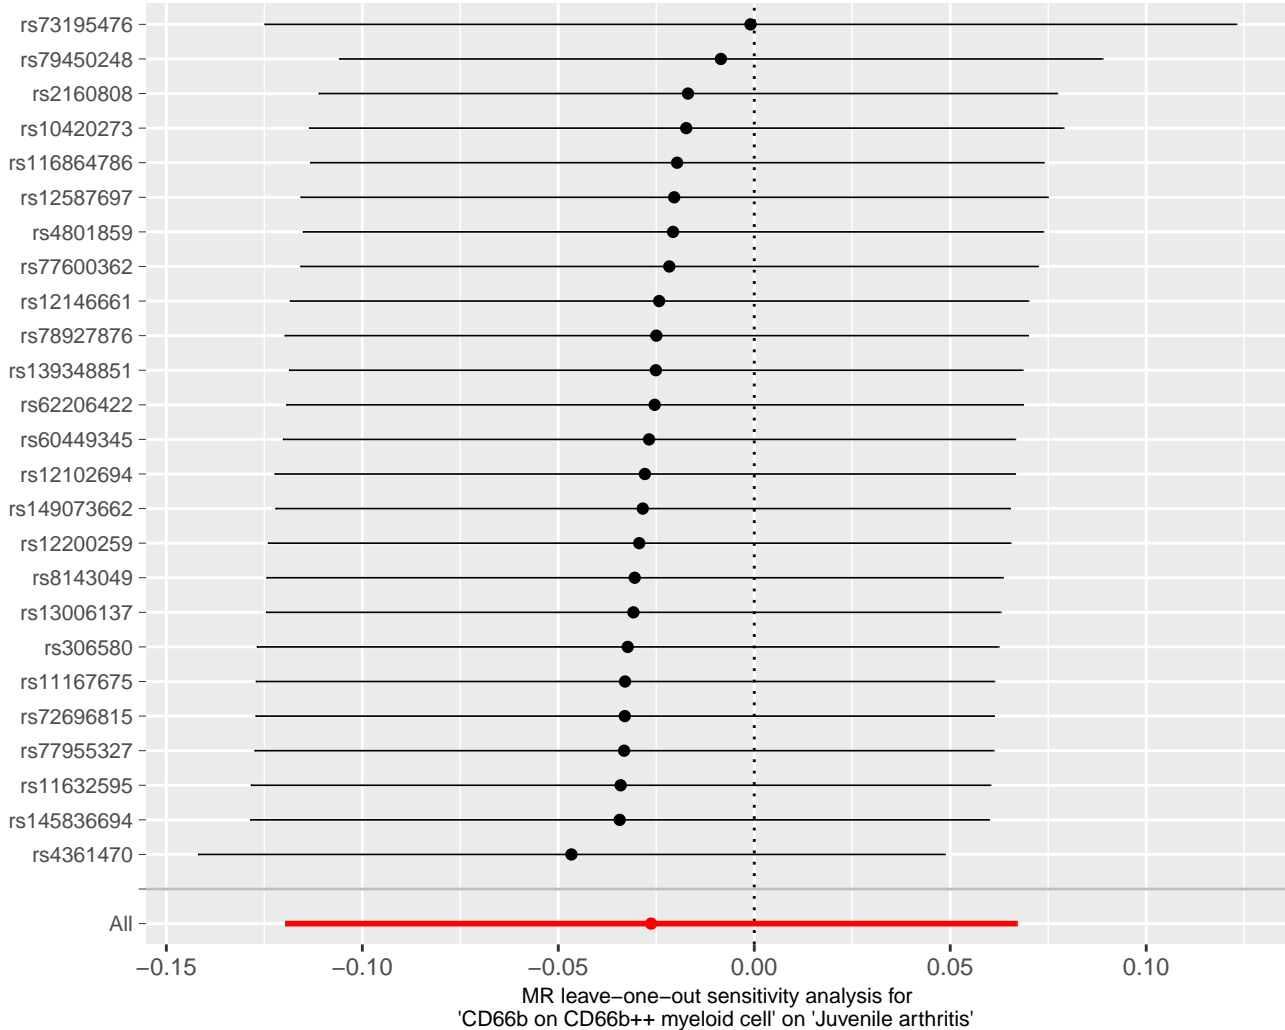

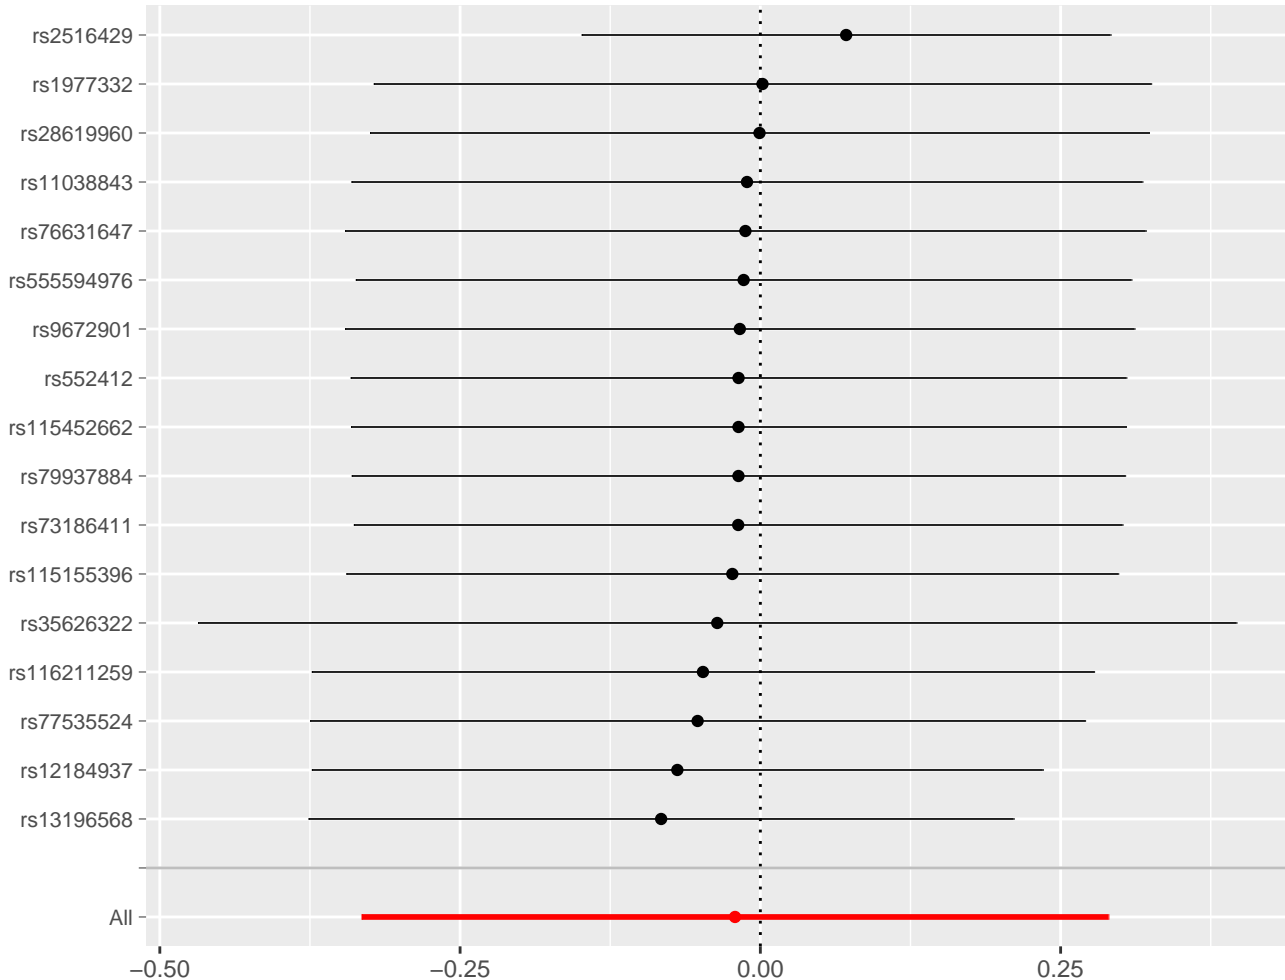

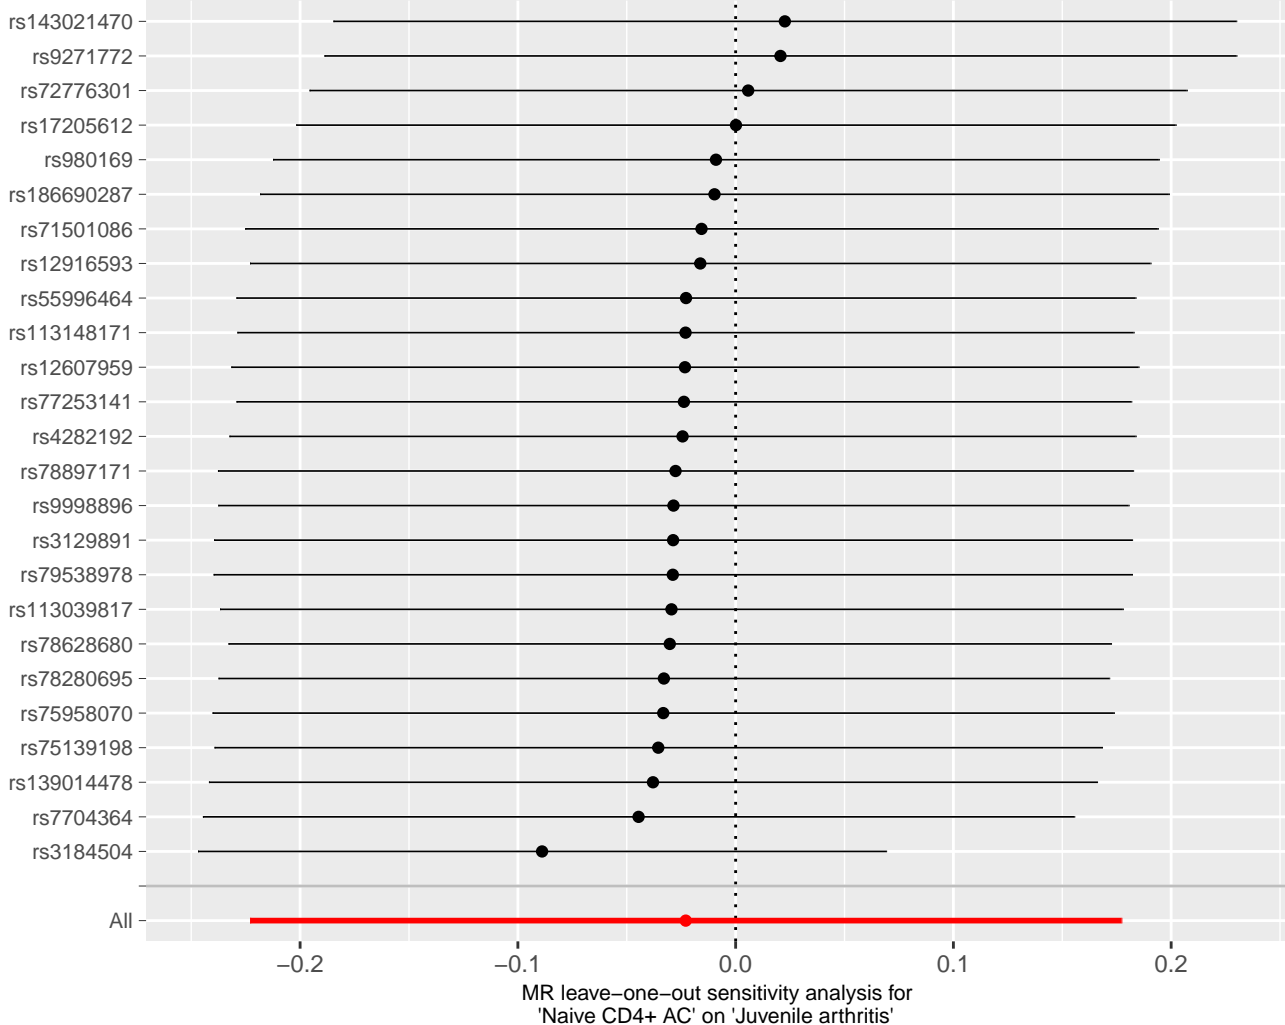

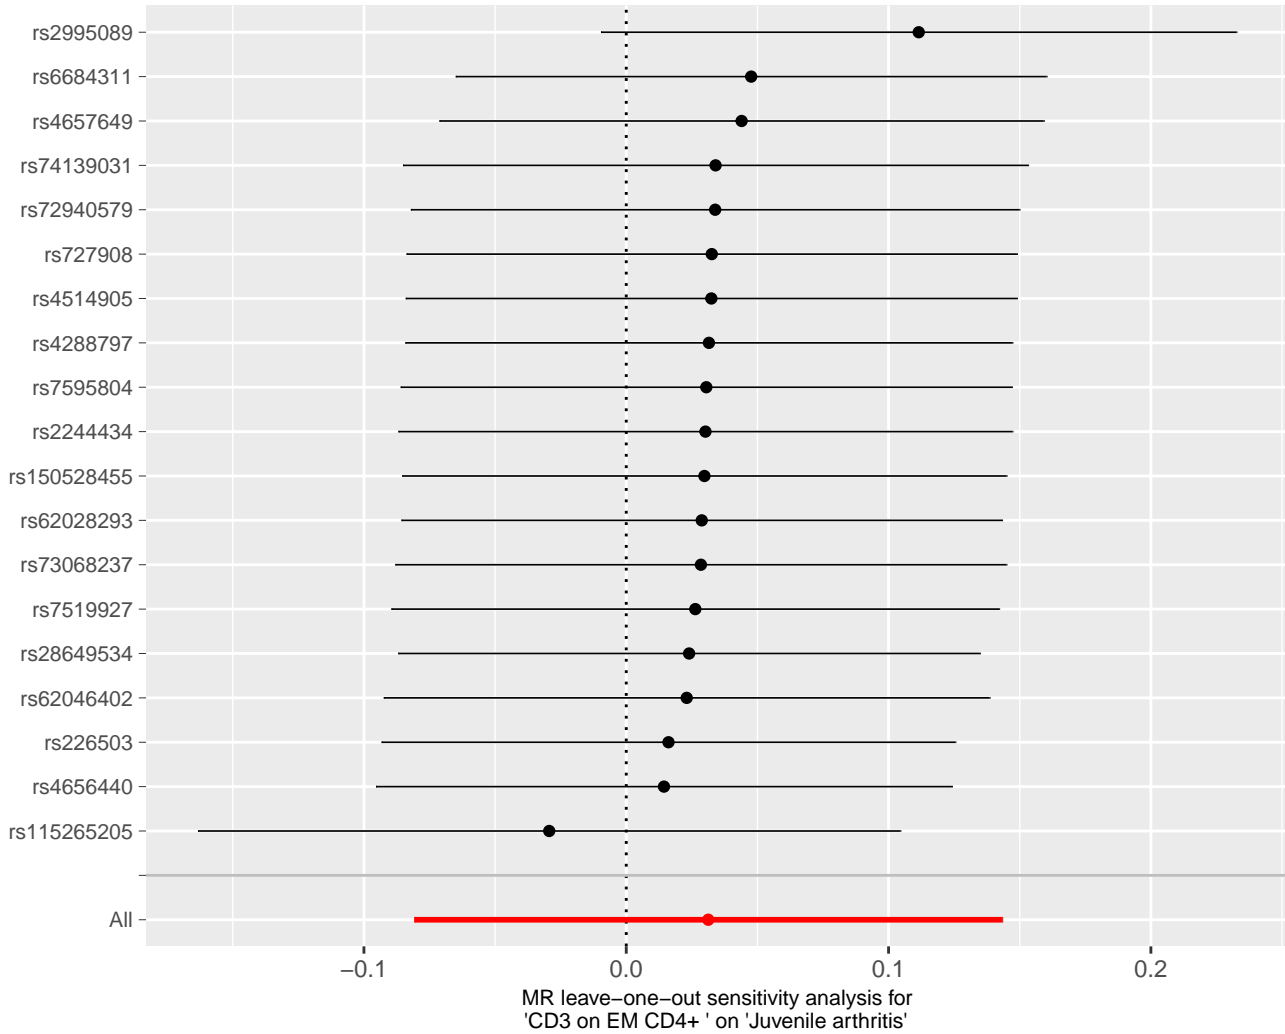

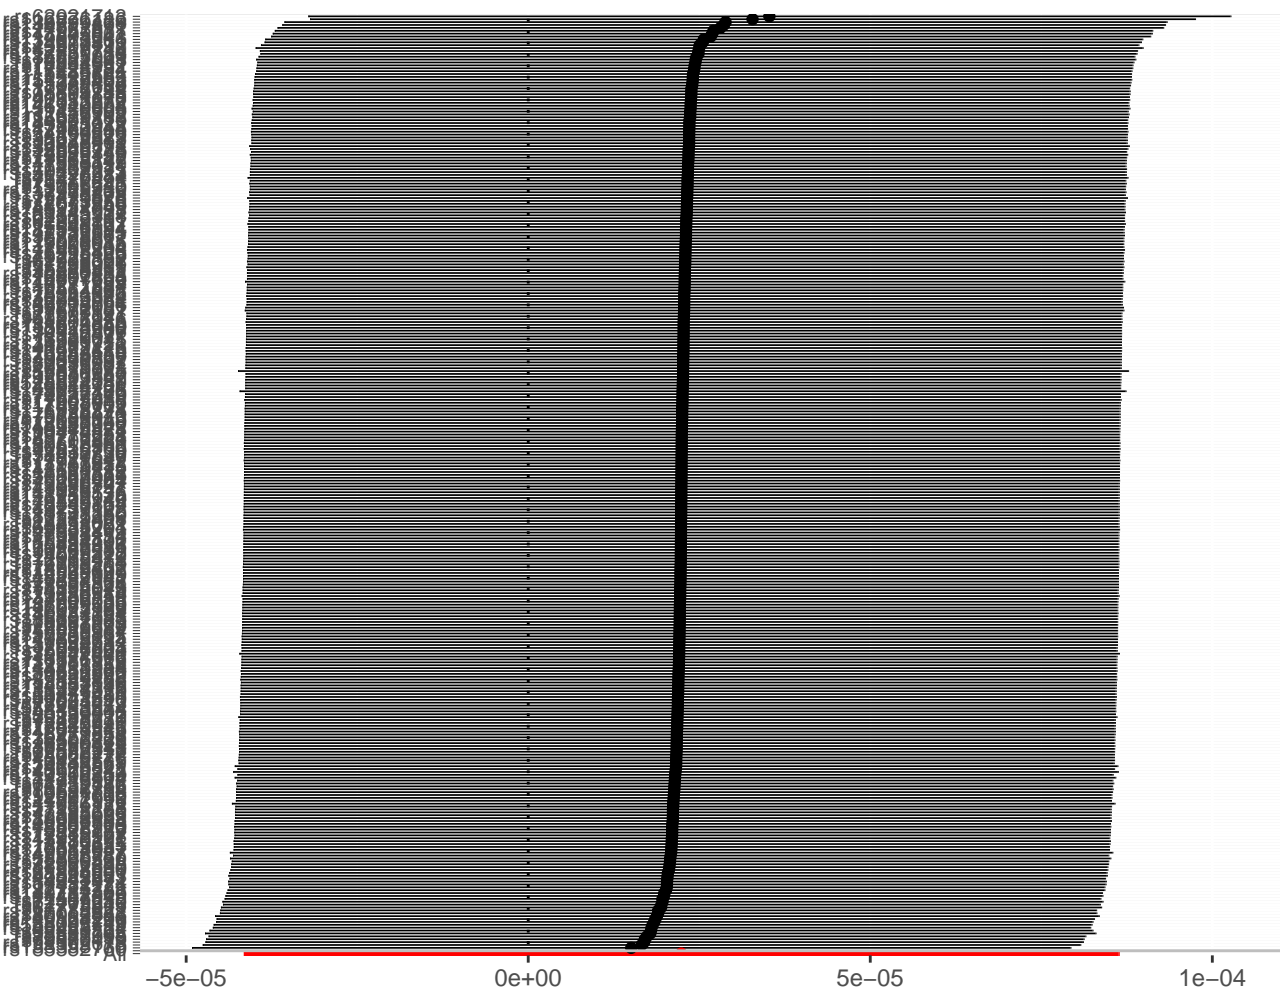

MR leave-one-out sensitivity analysis for  
'CD45RA- CD28- CD8br AC' on 'Juvenile arthritis'



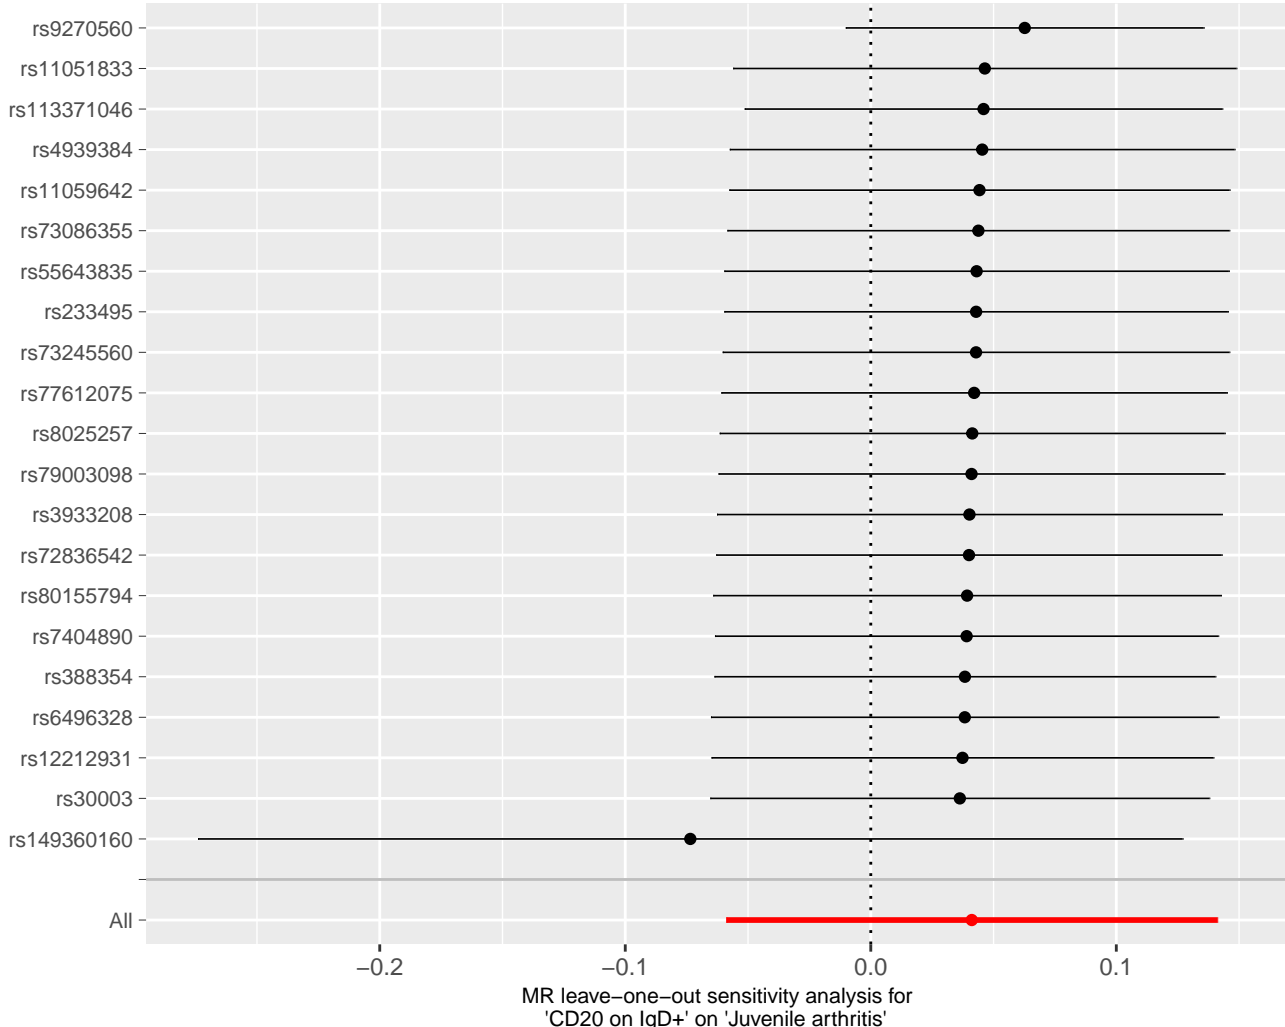

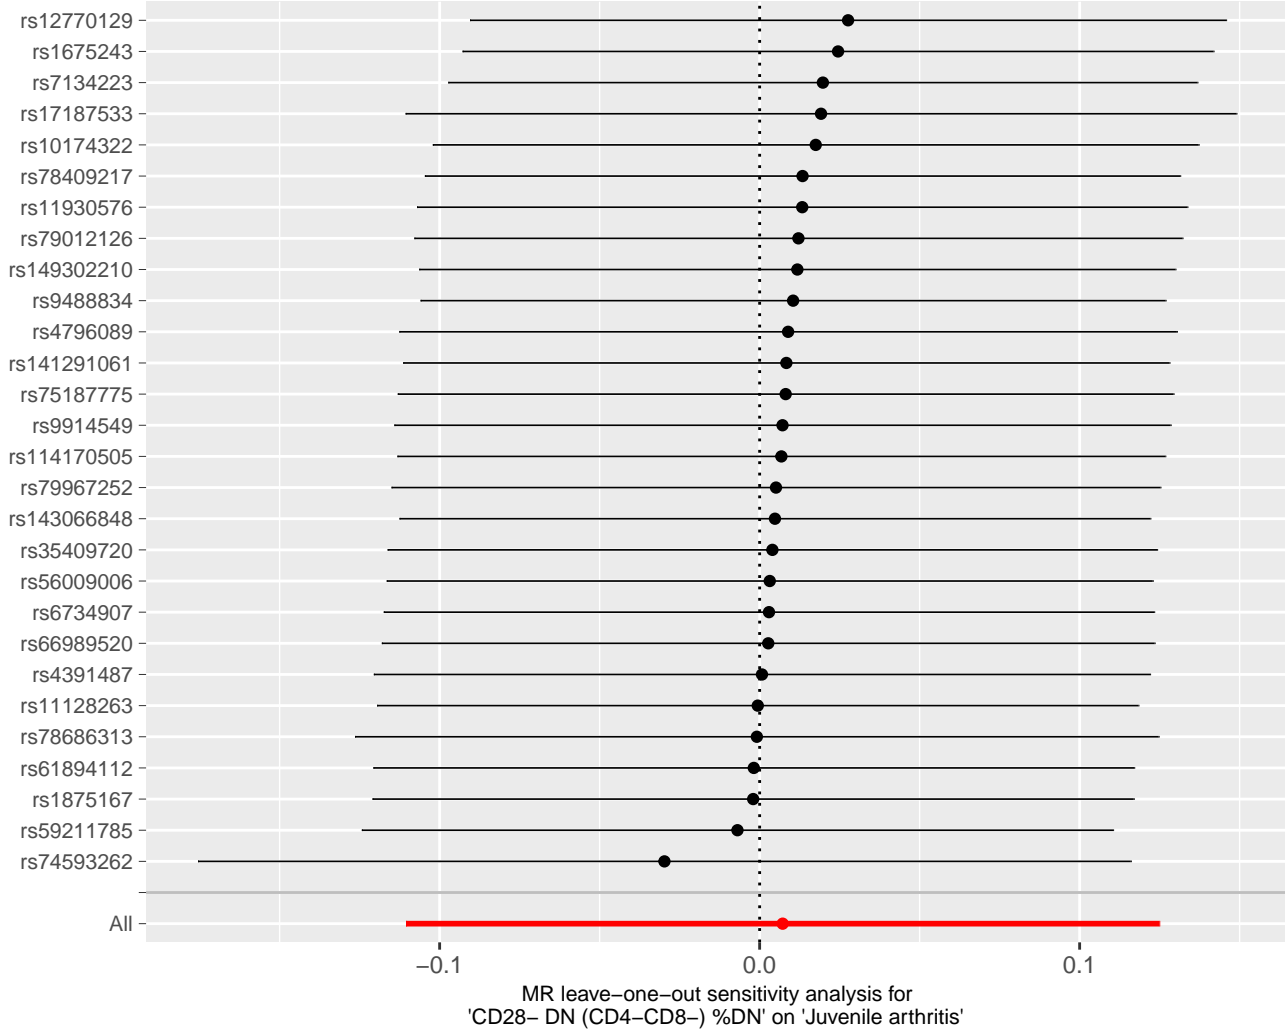

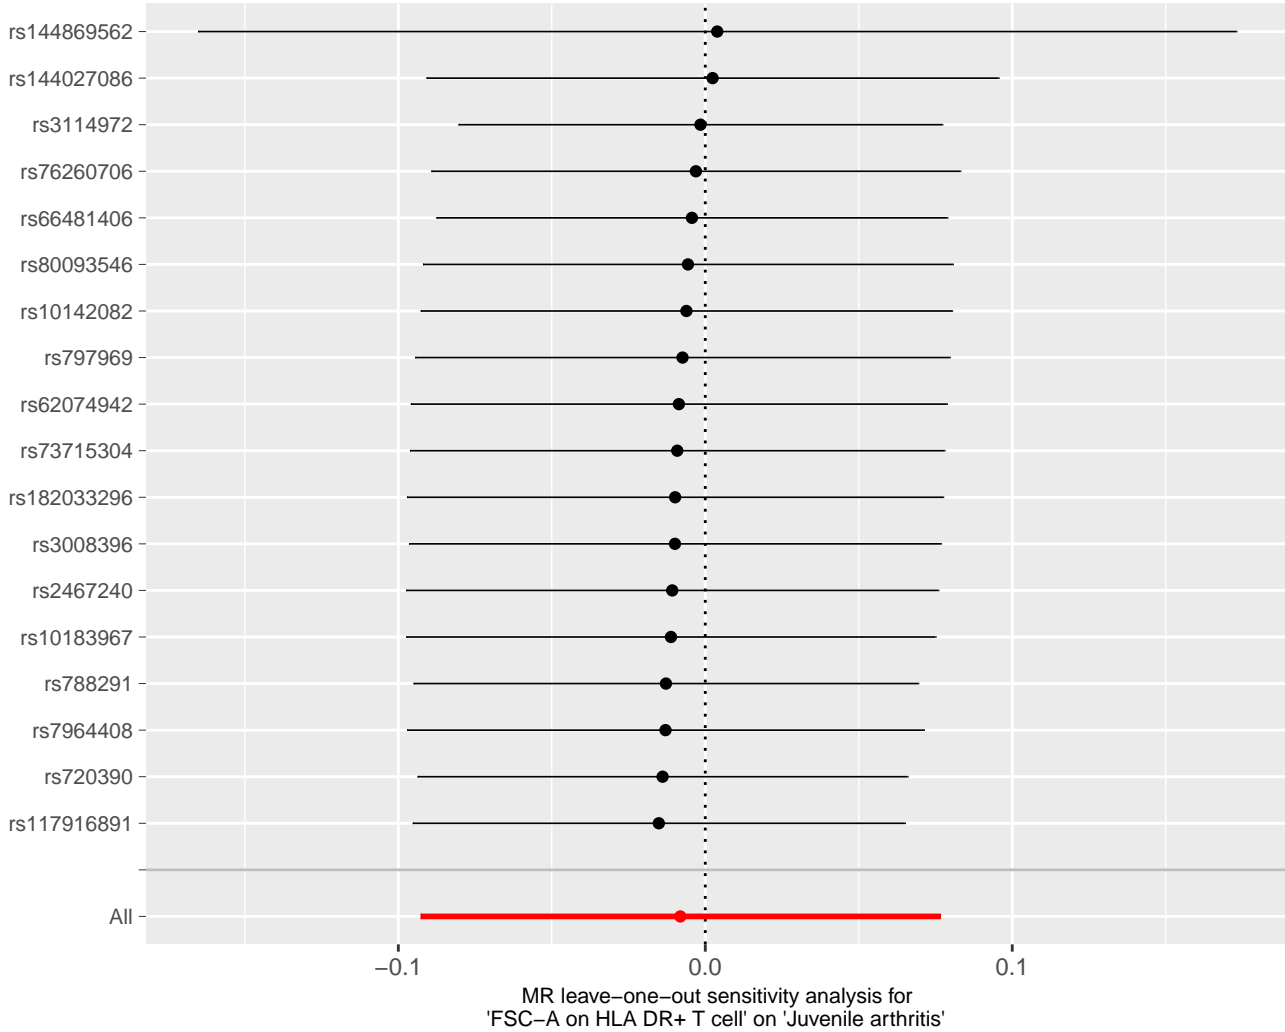

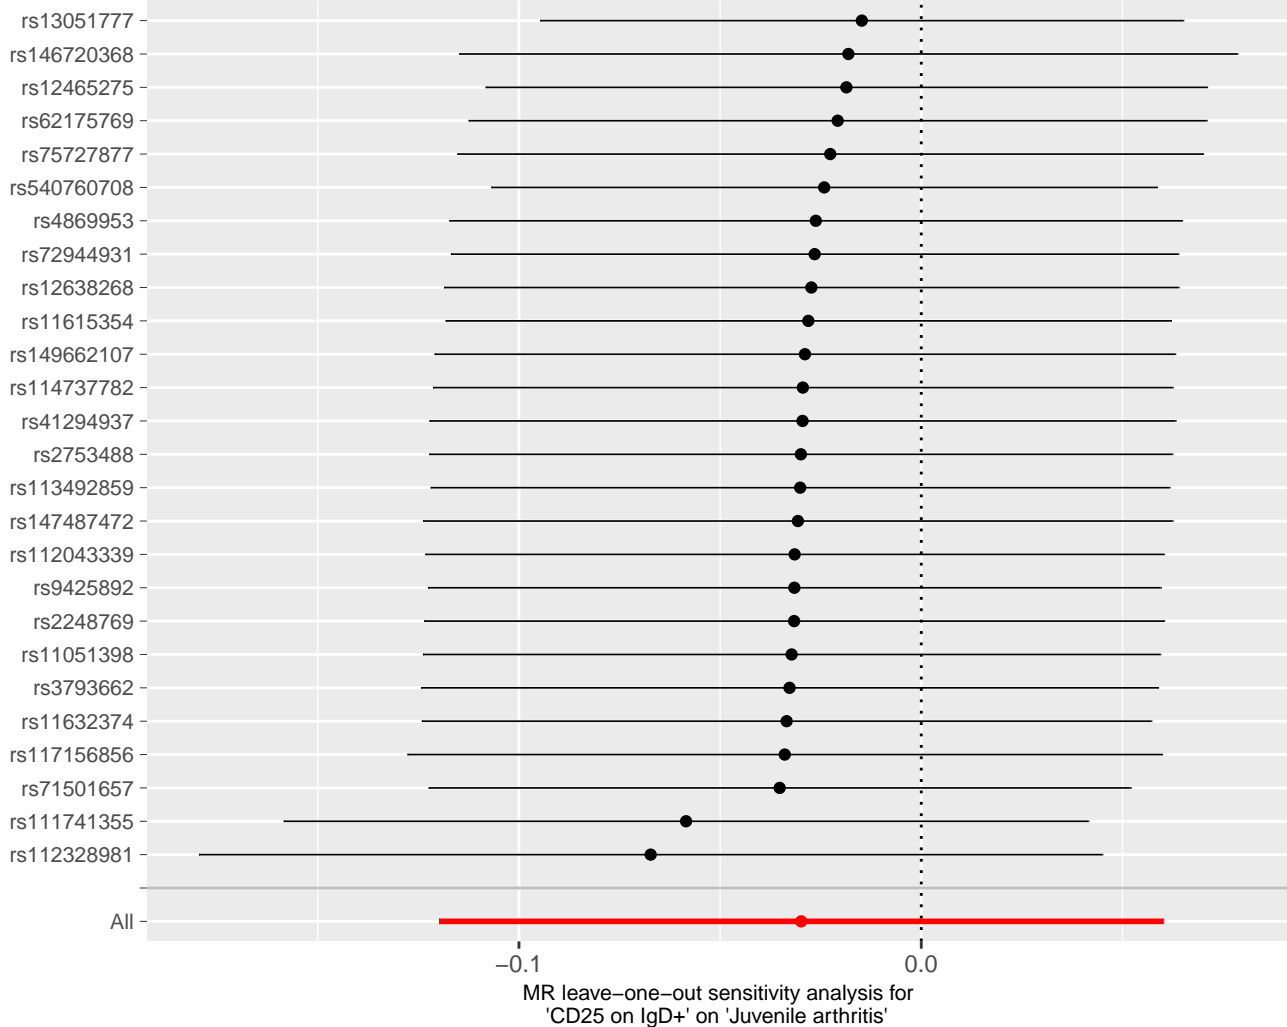

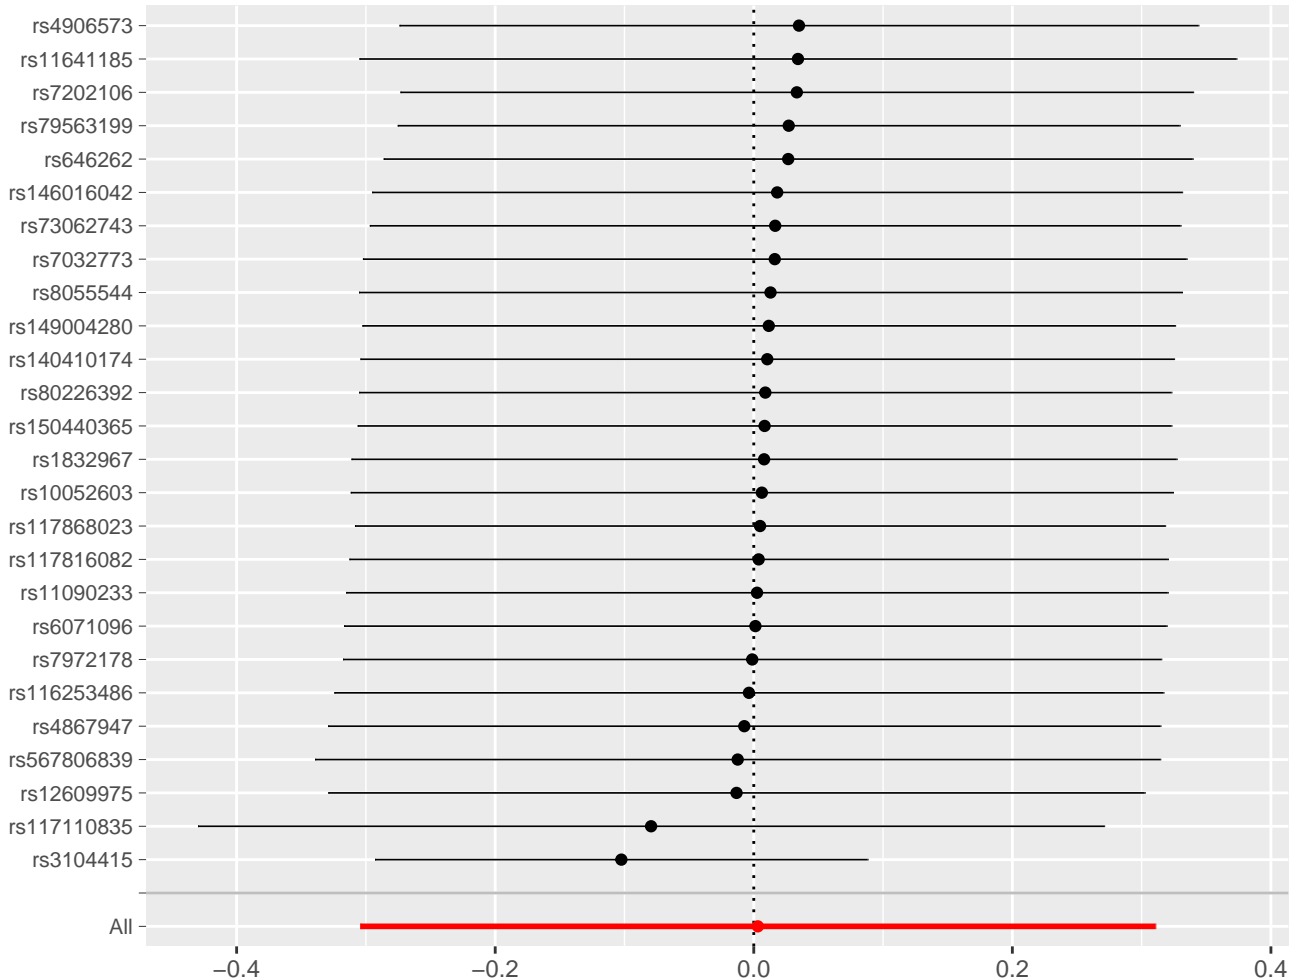

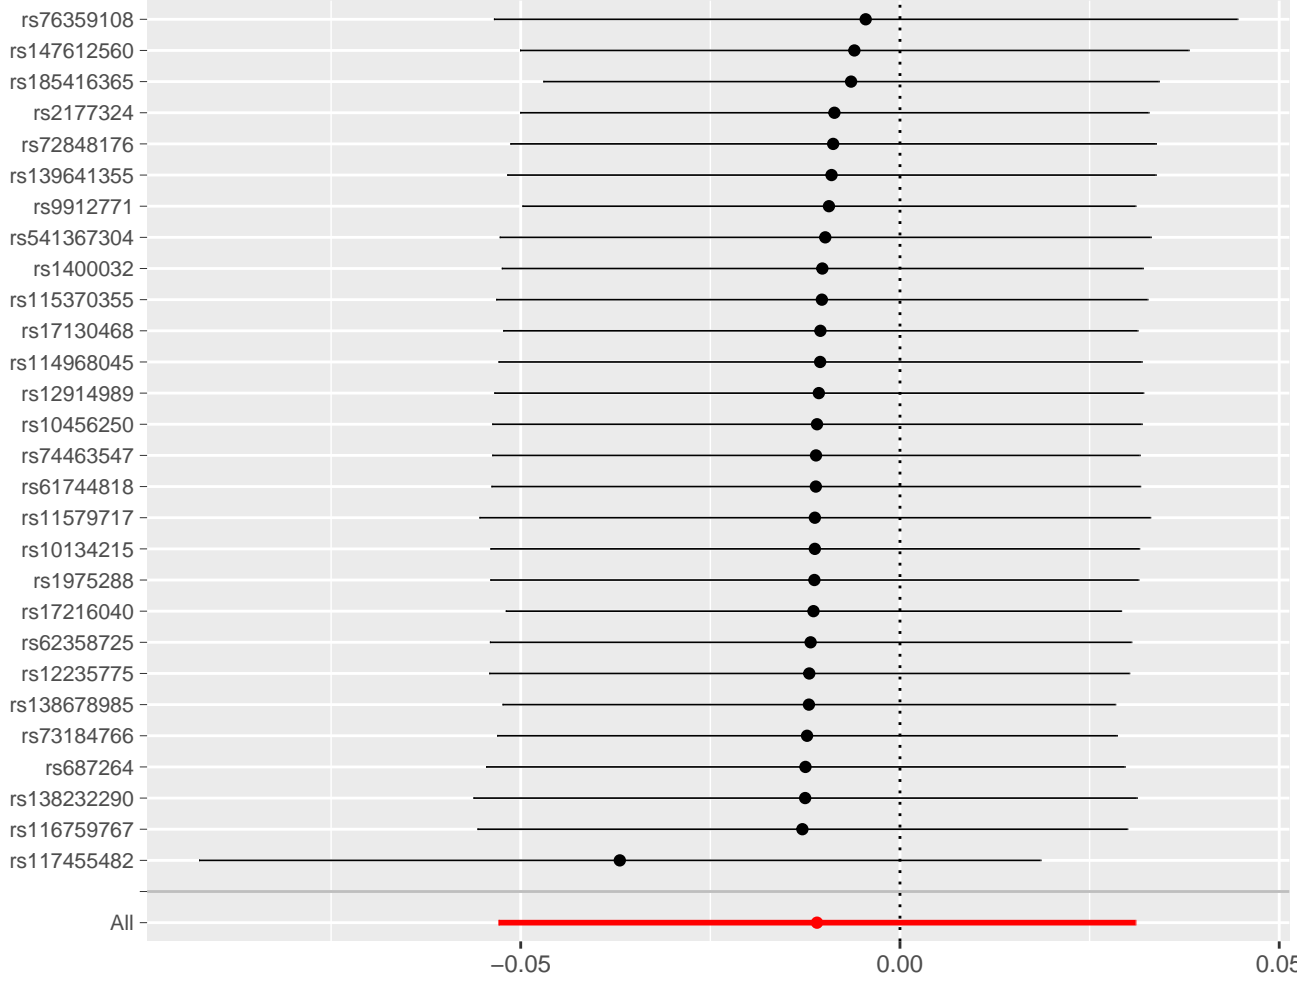

MR leave-one-out sensitivity analysis for 'CD28+ CD45RA- CD8dim %T cell' on 'Juvenile arthritis'

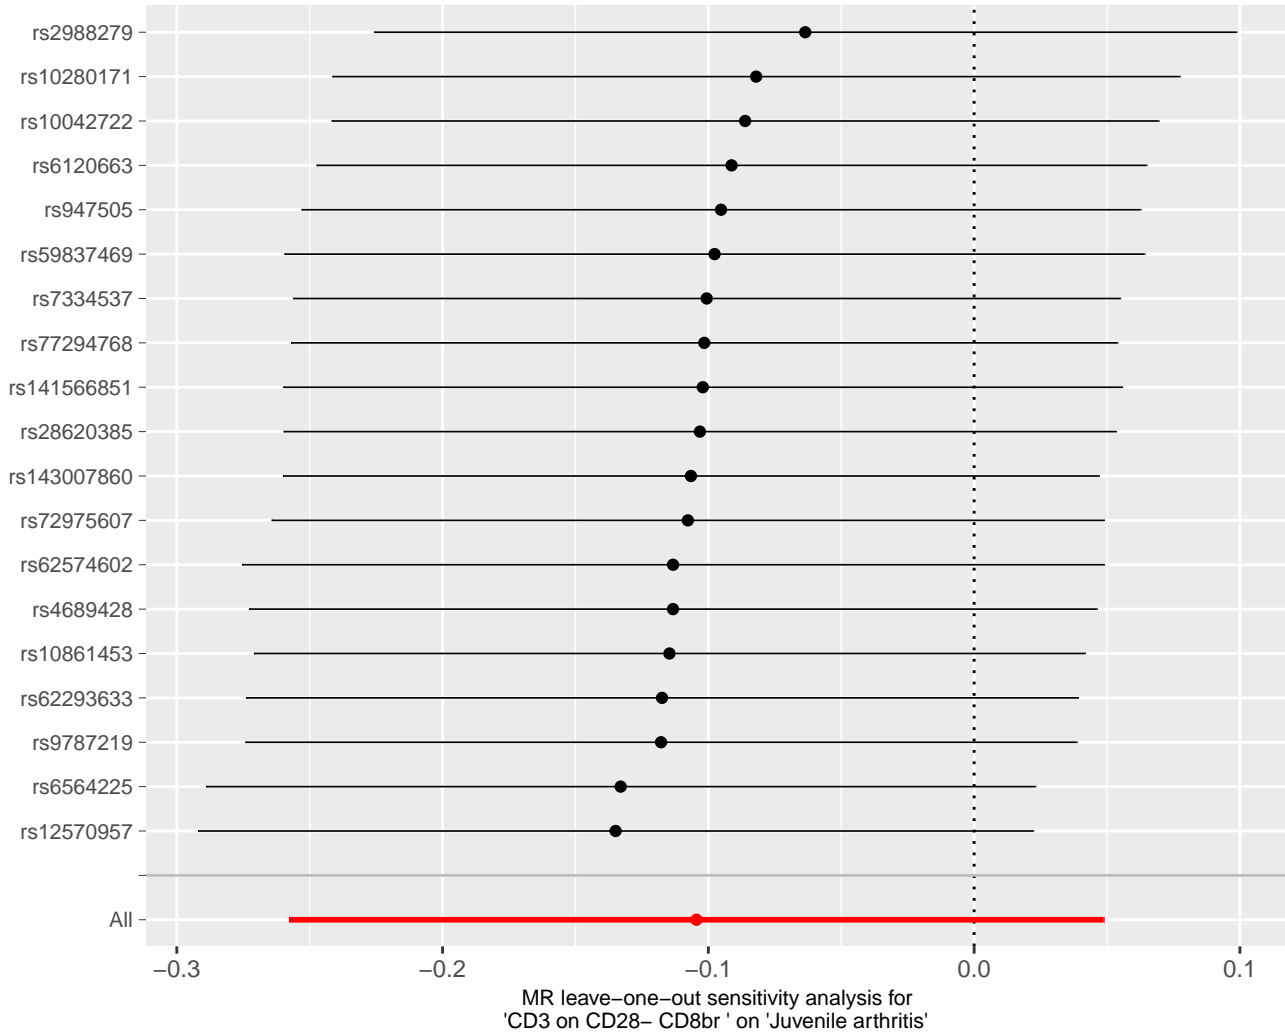

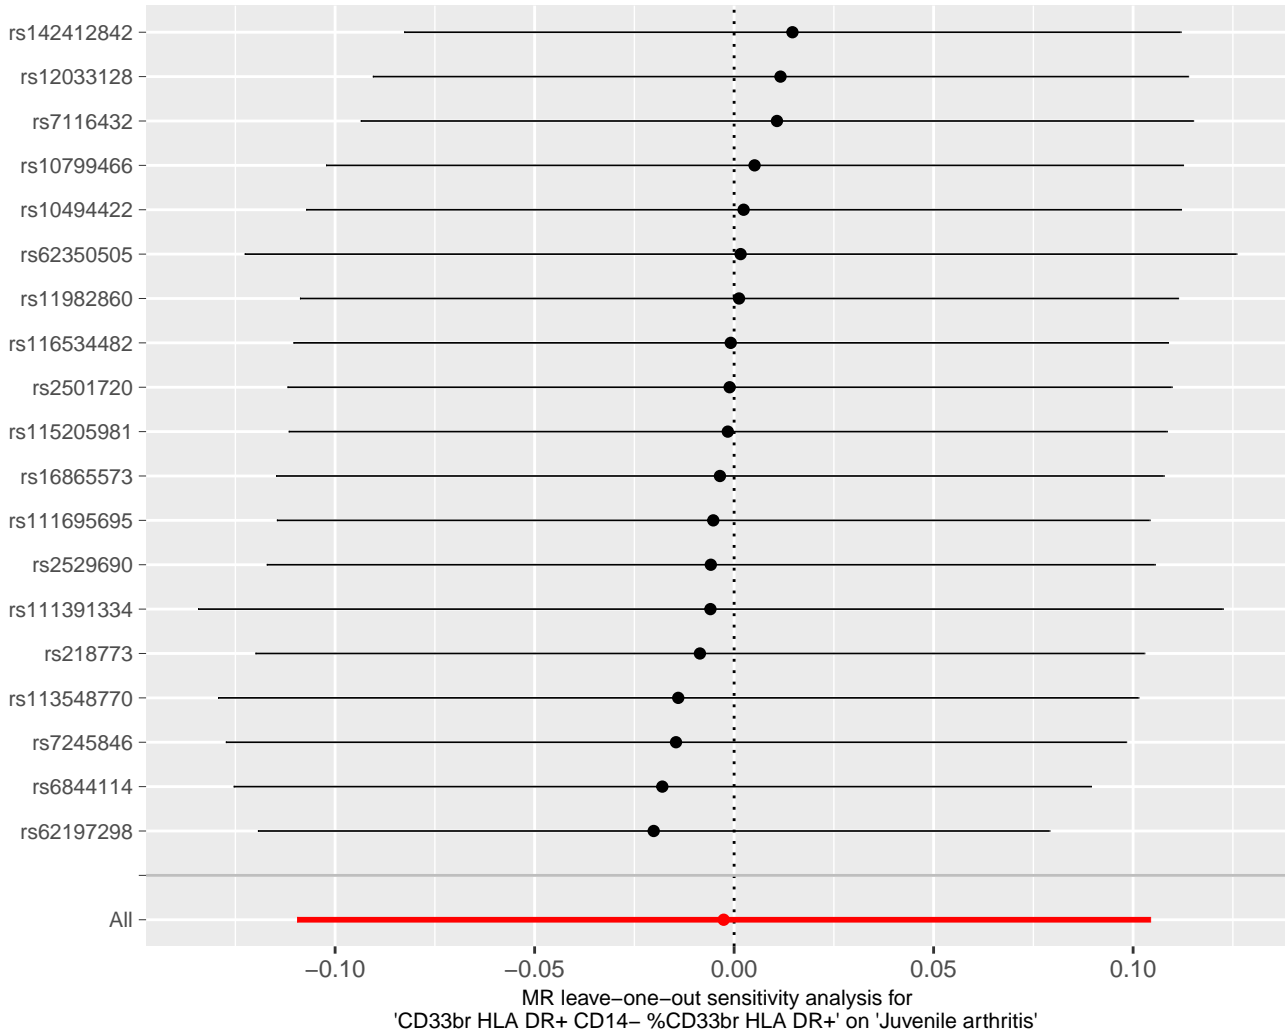



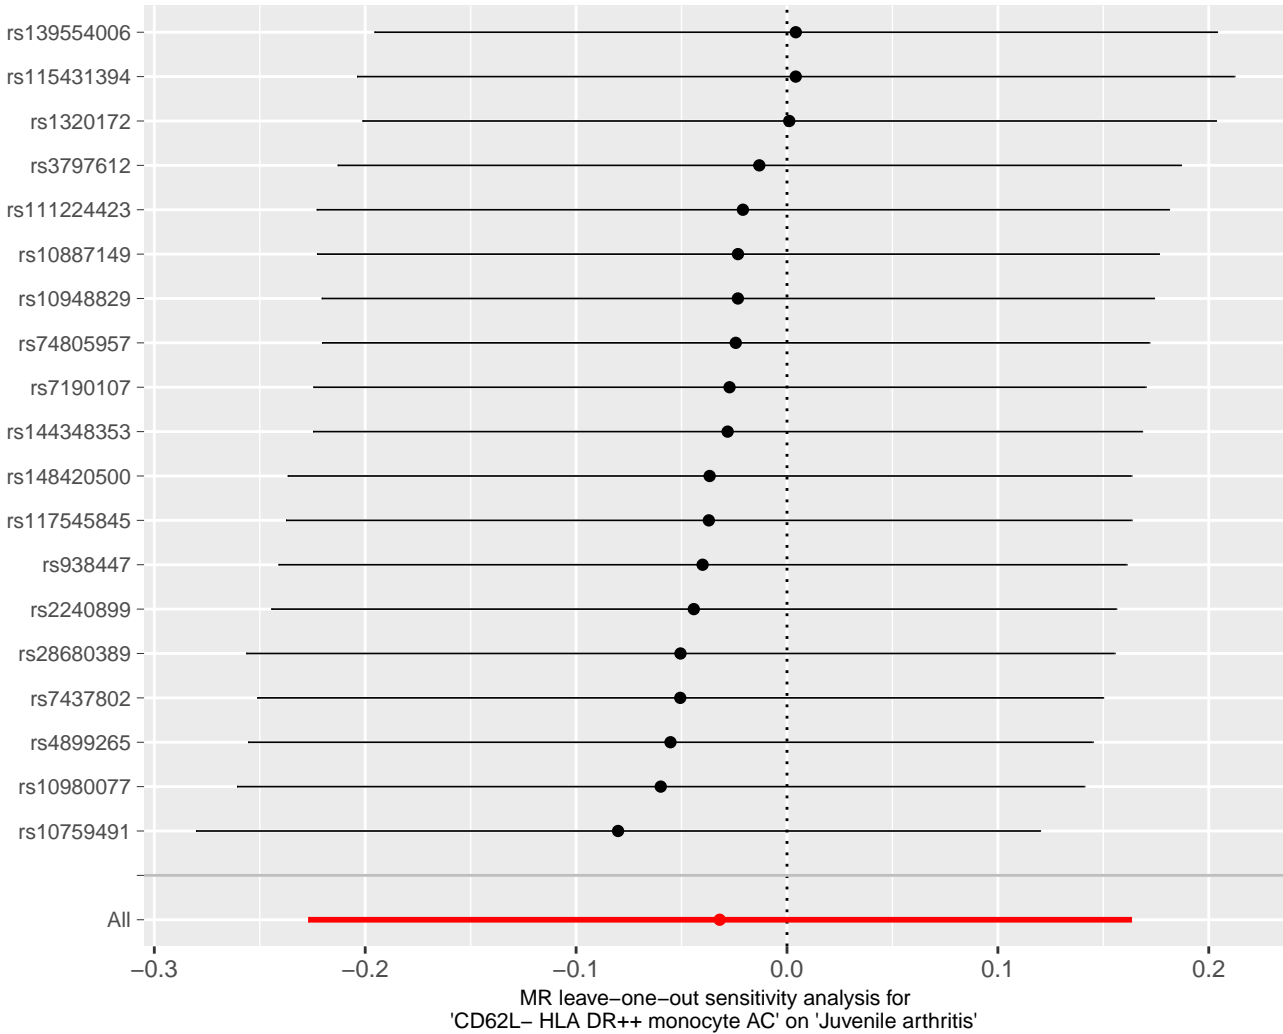

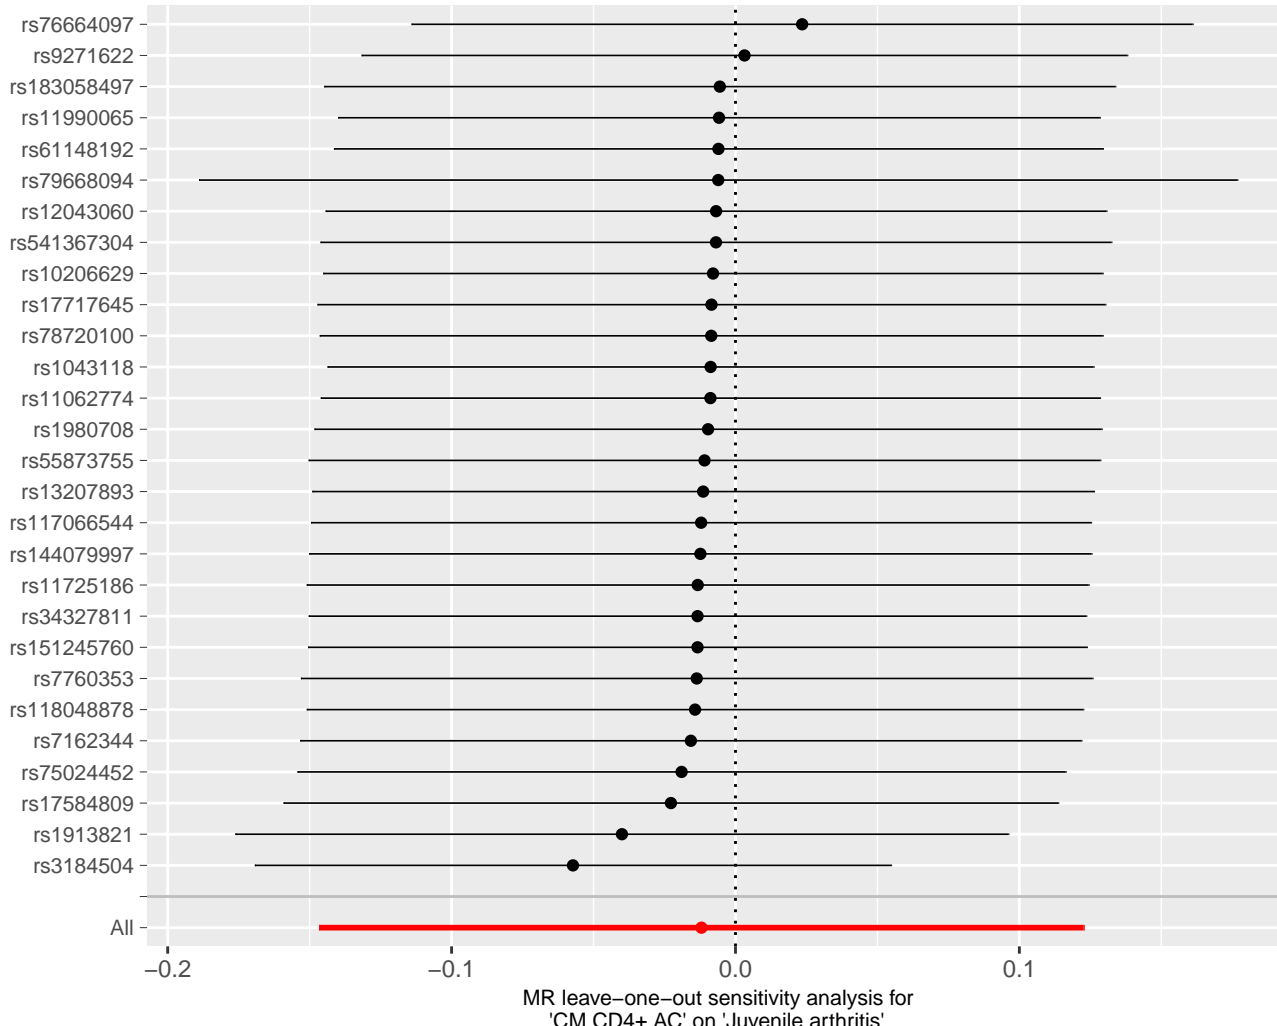

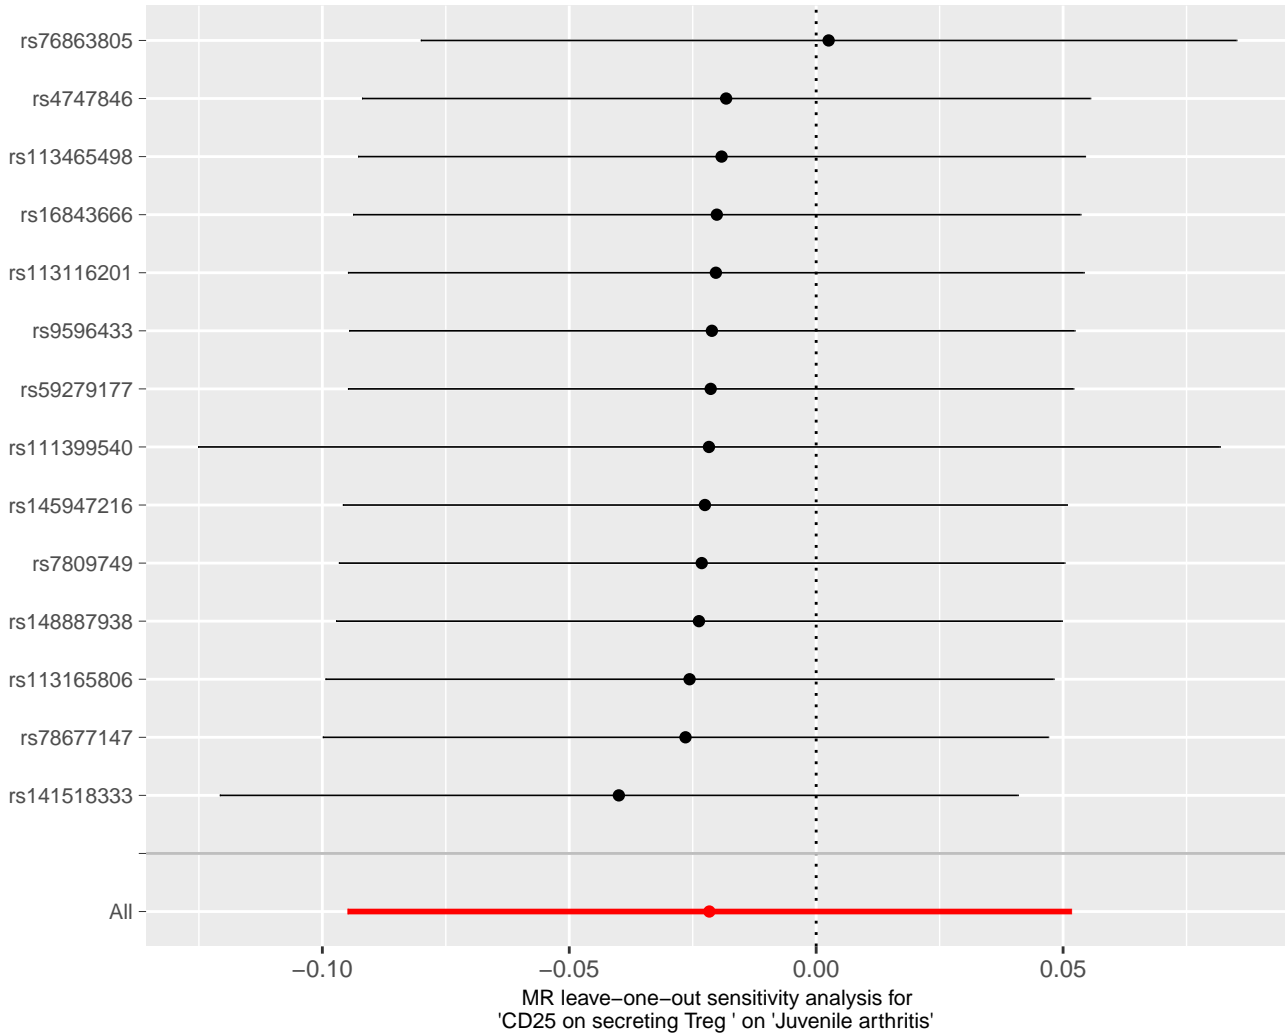

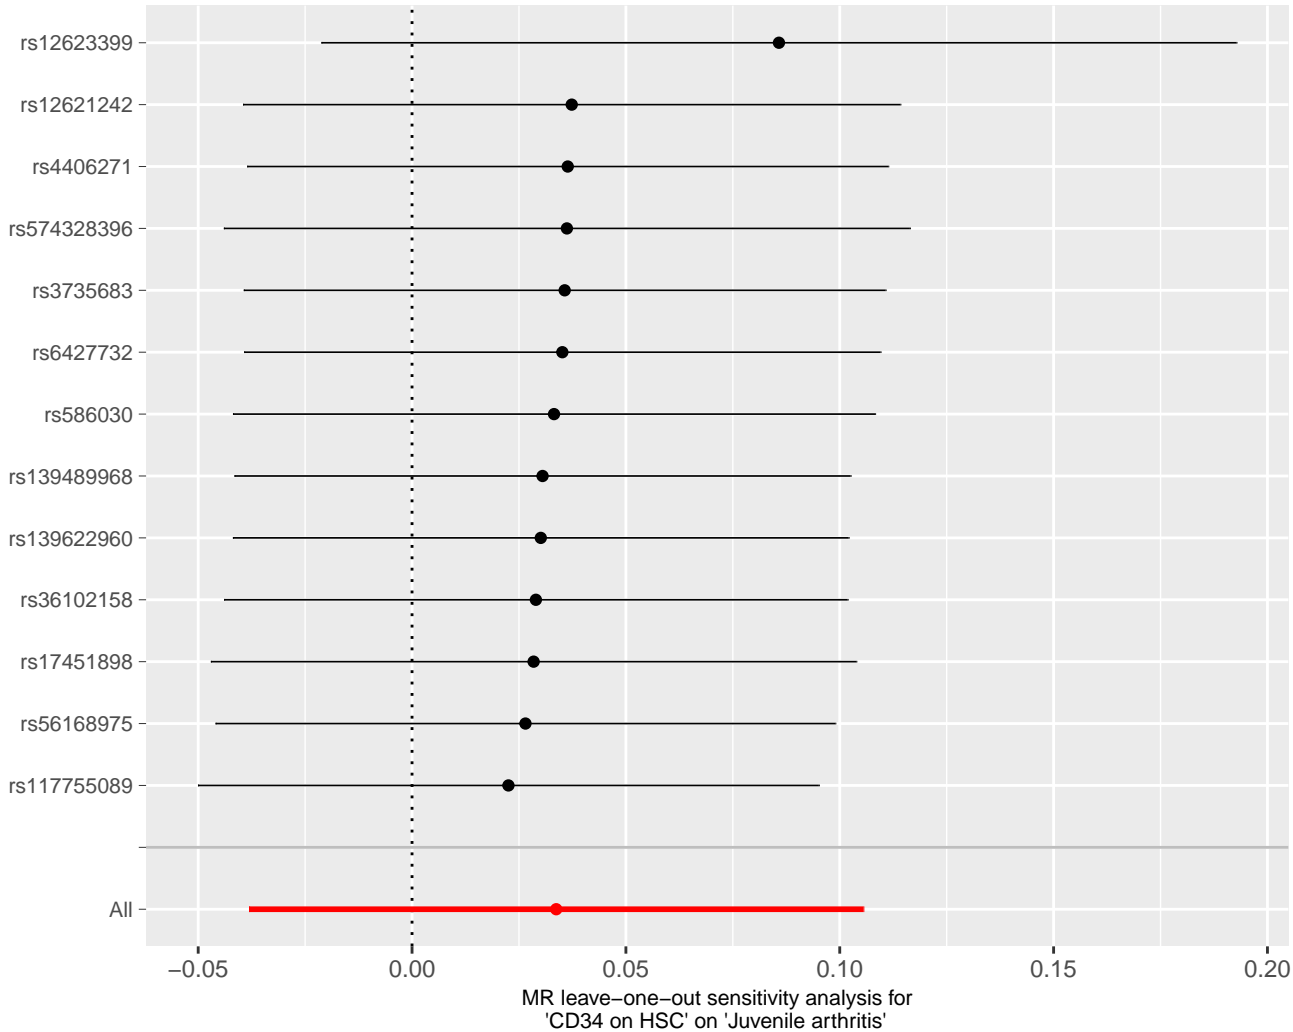

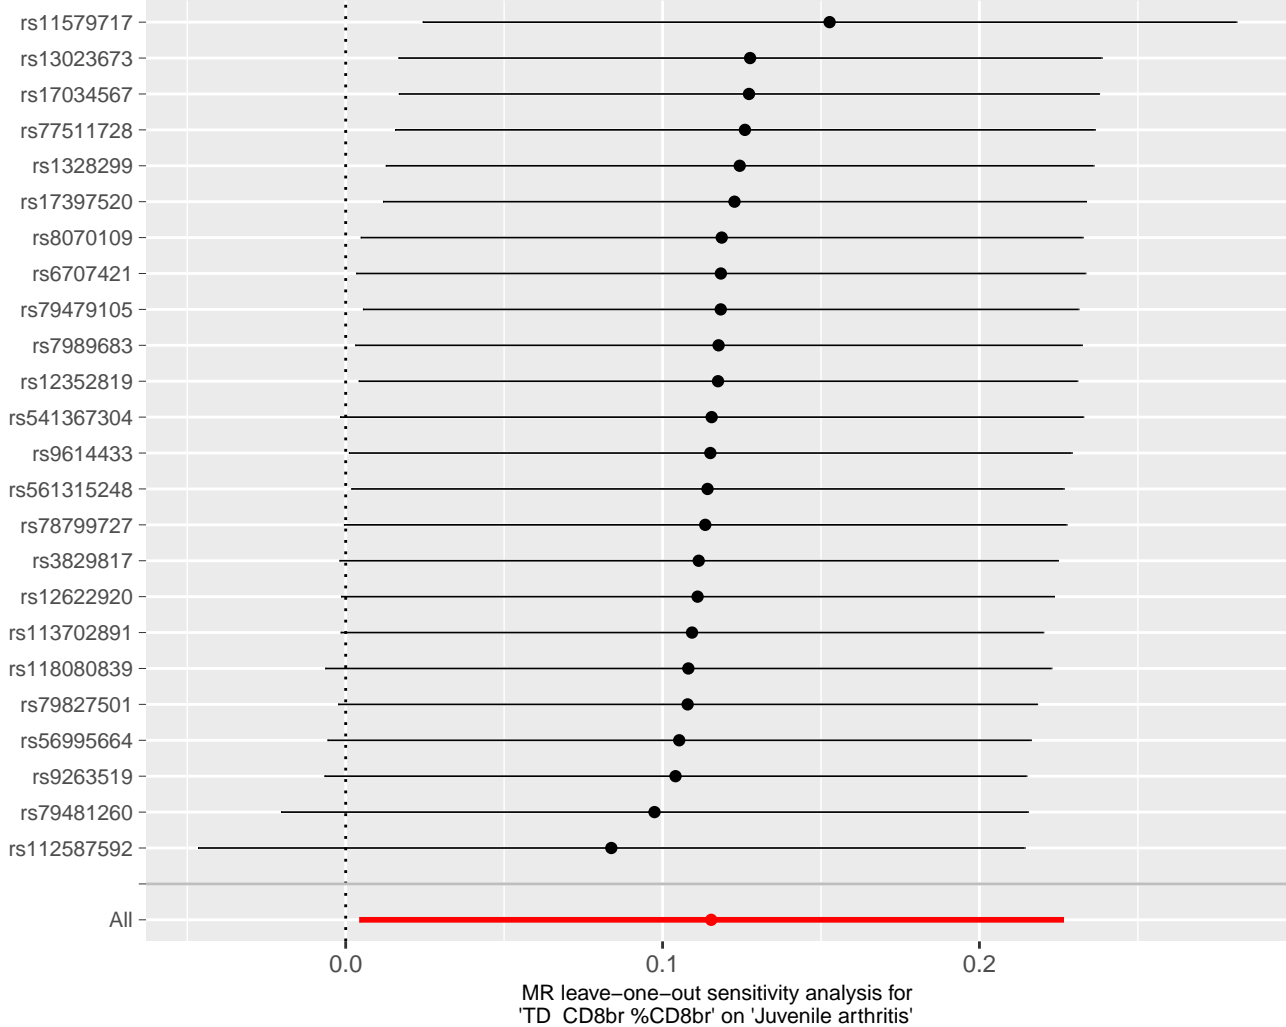

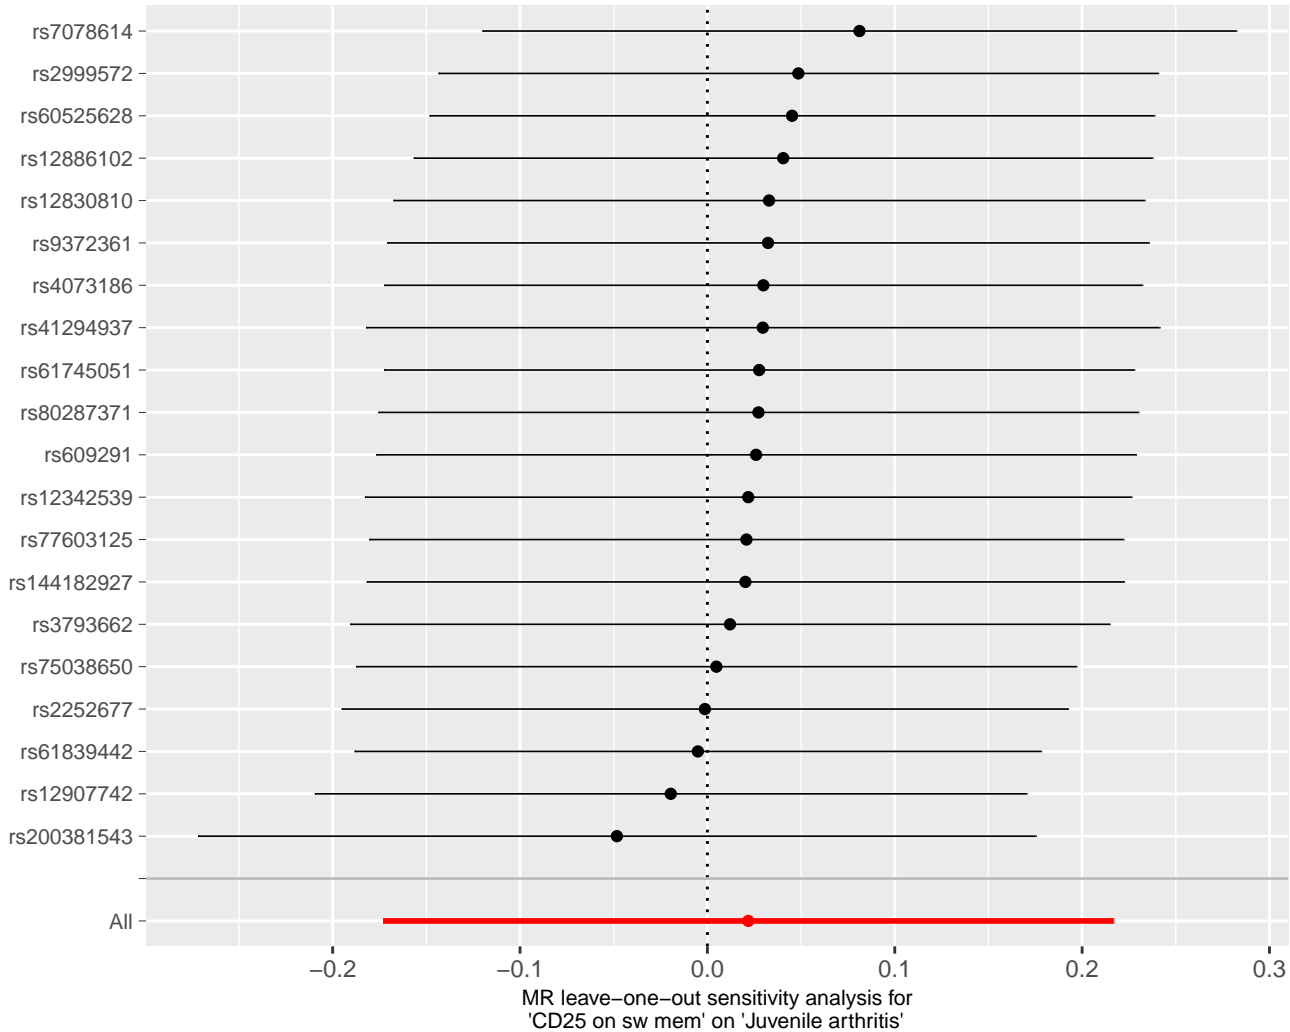

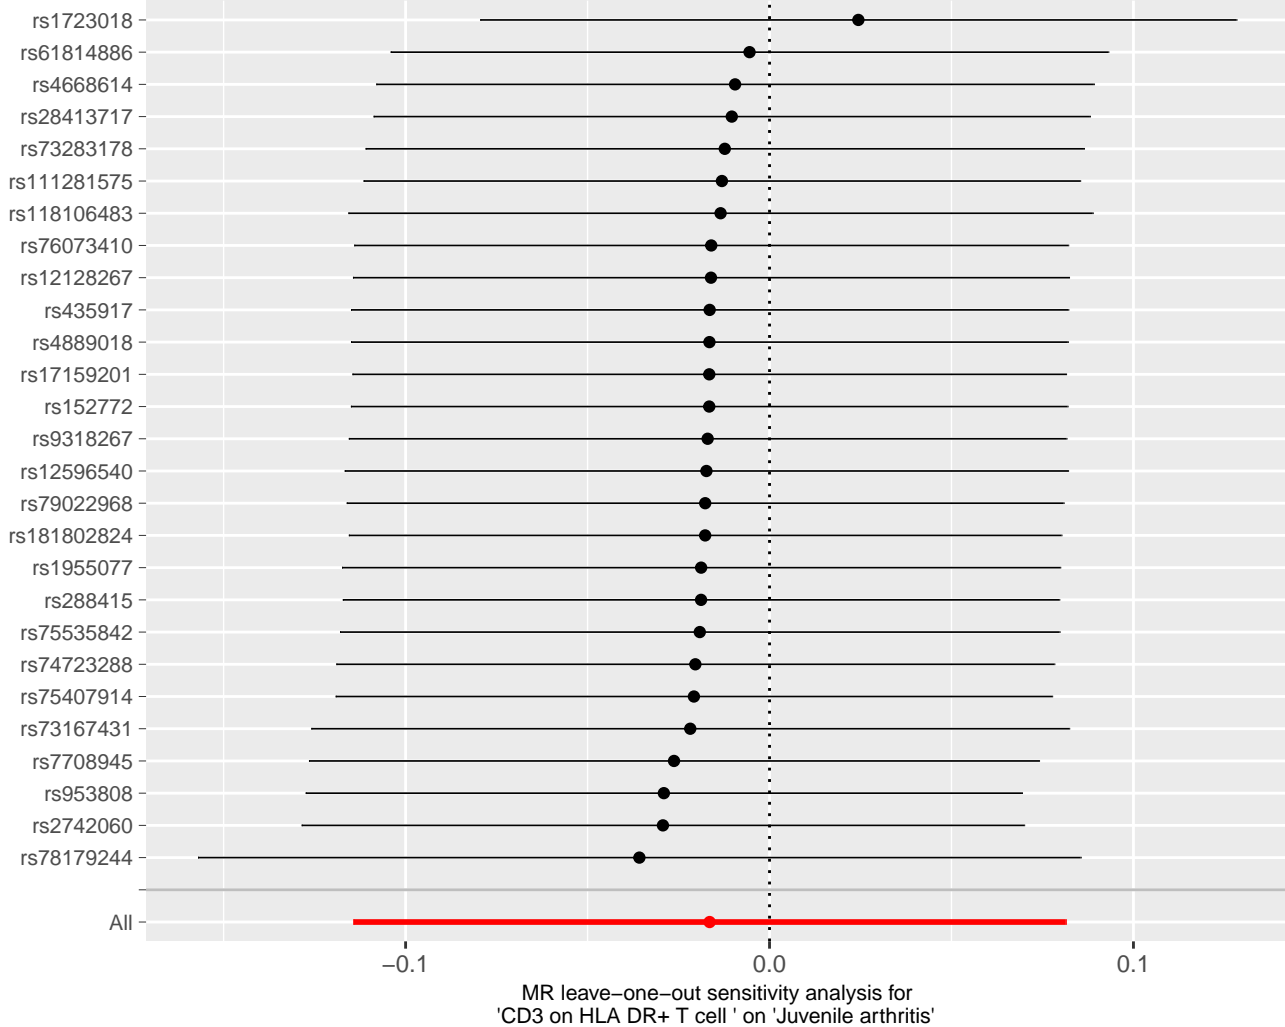

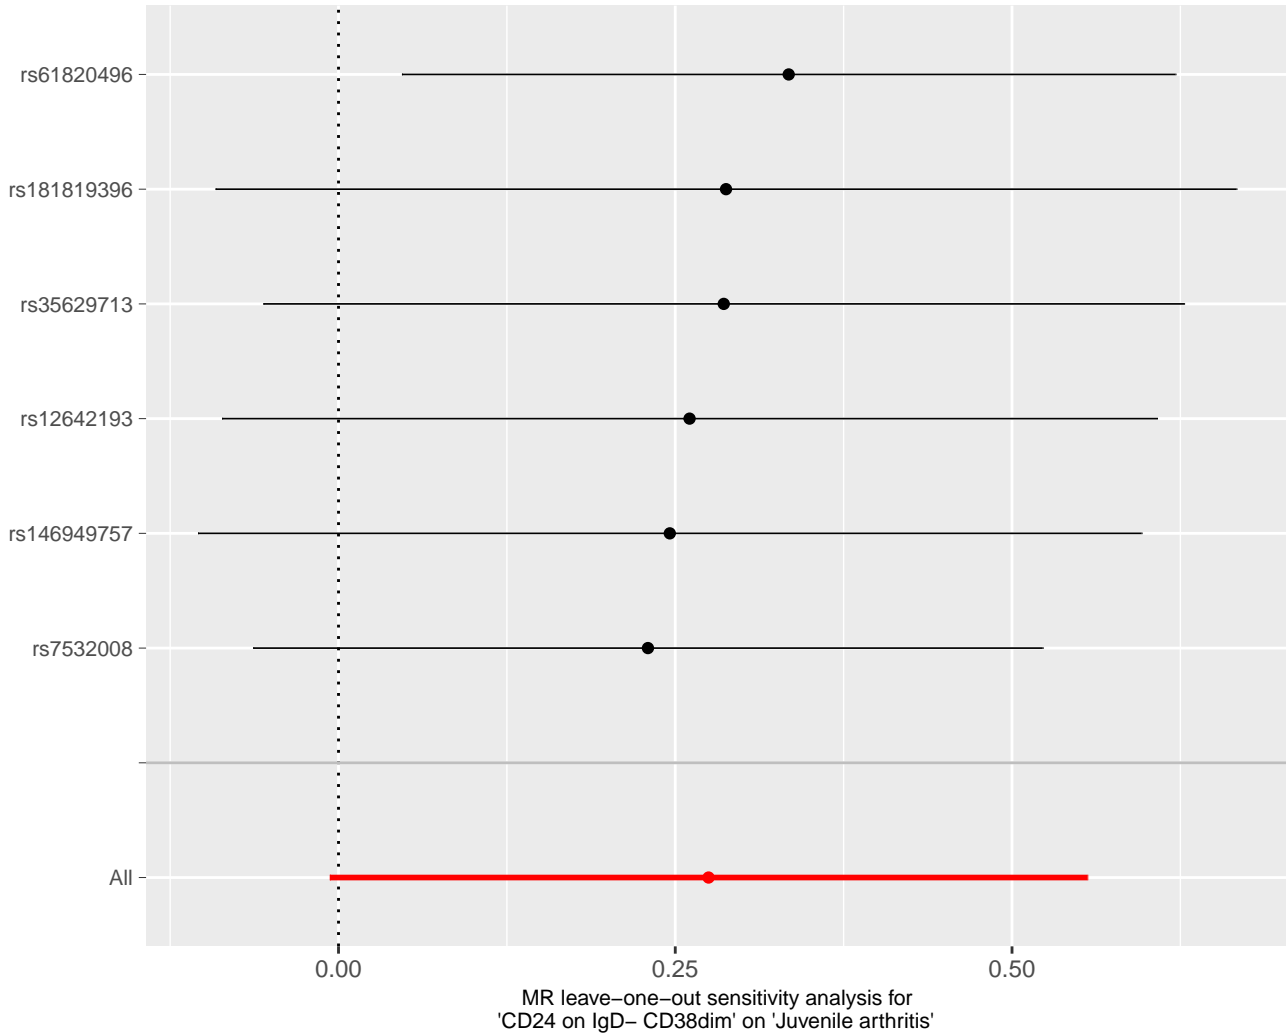



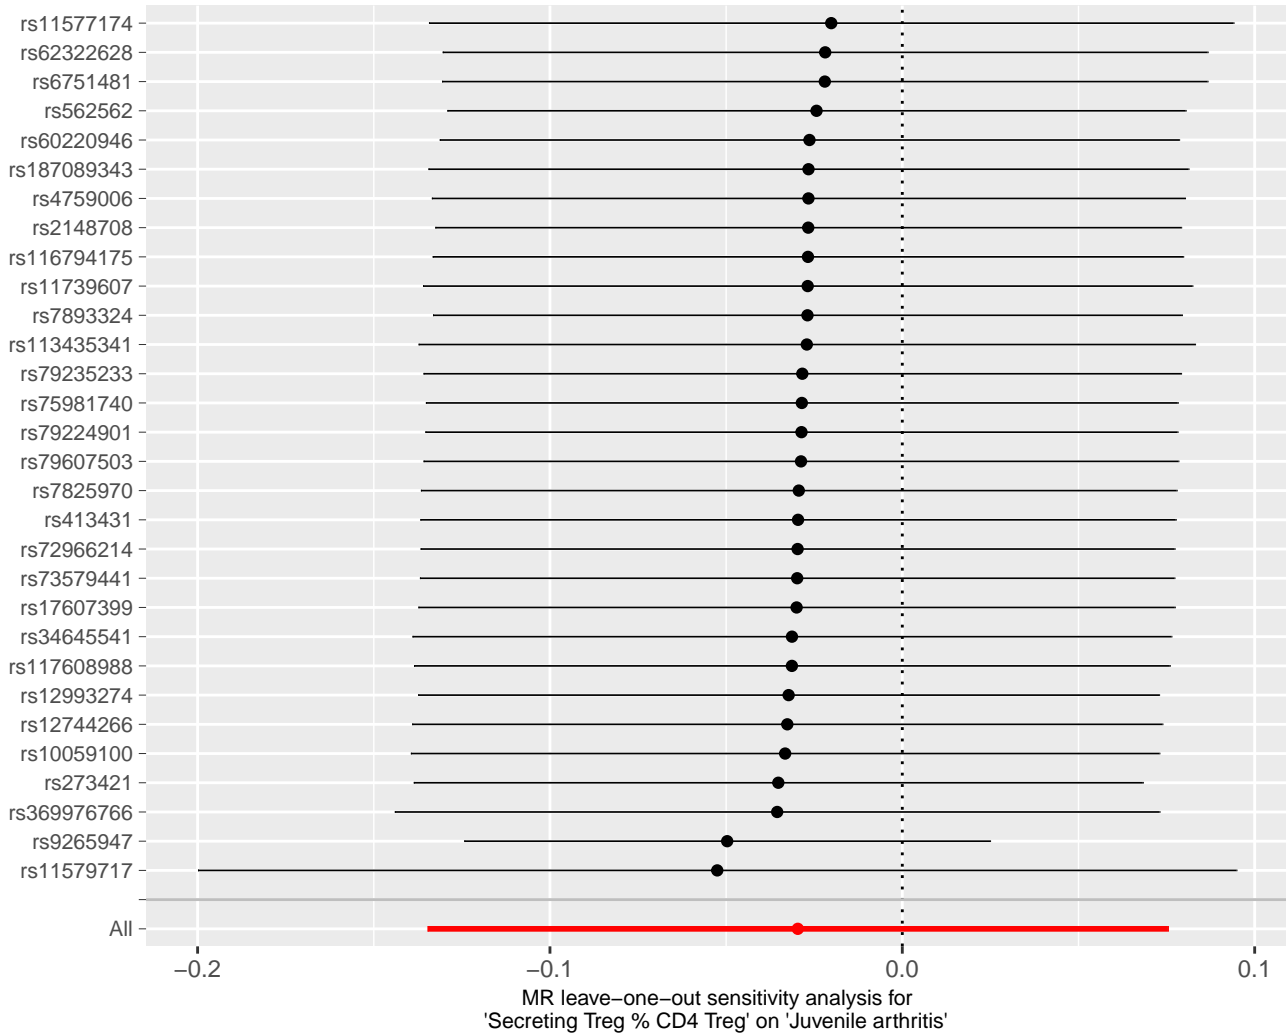

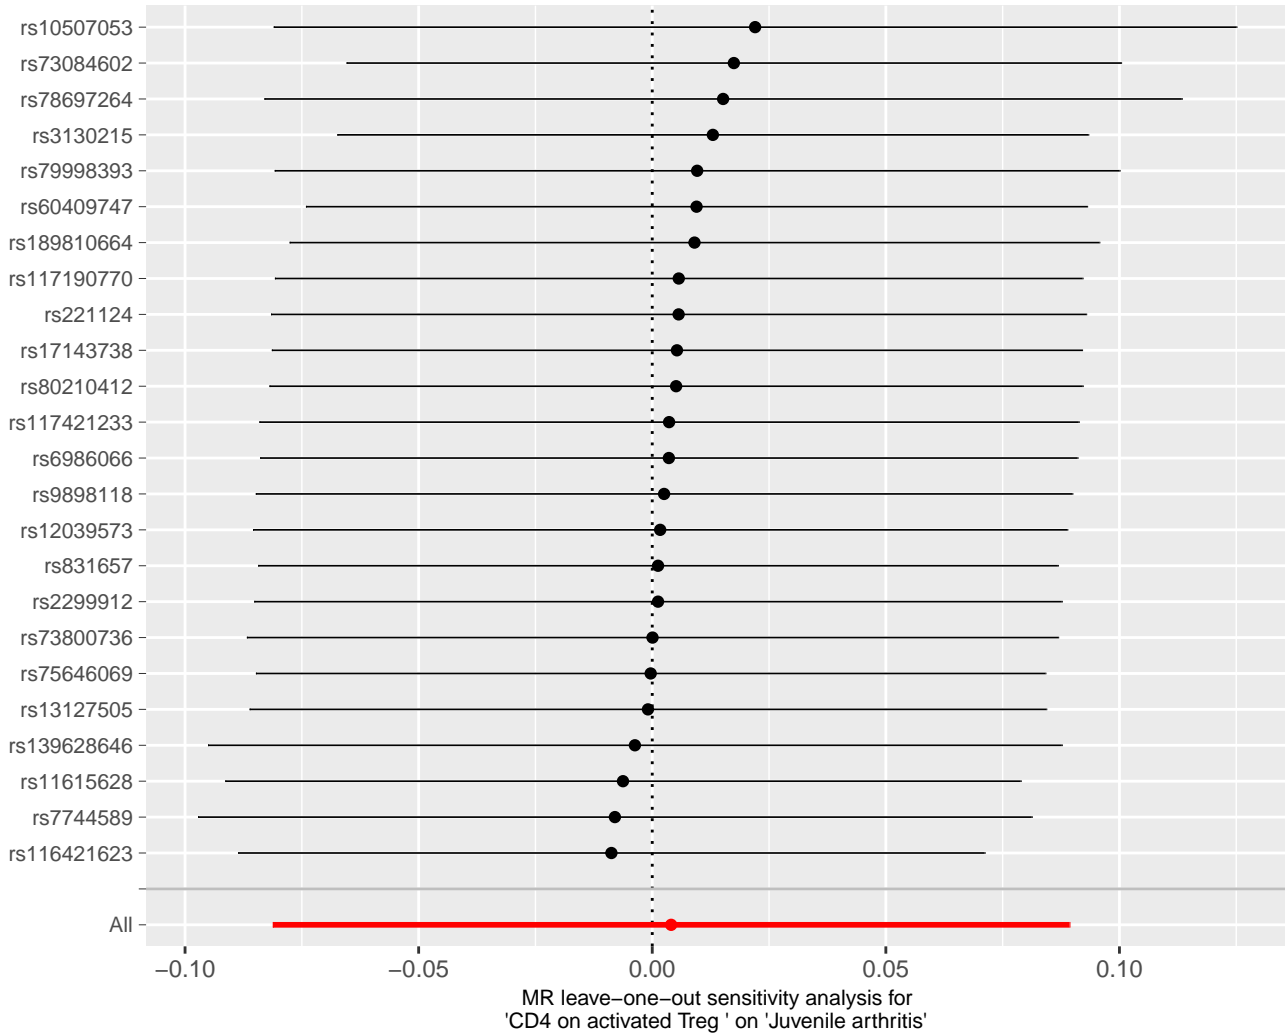

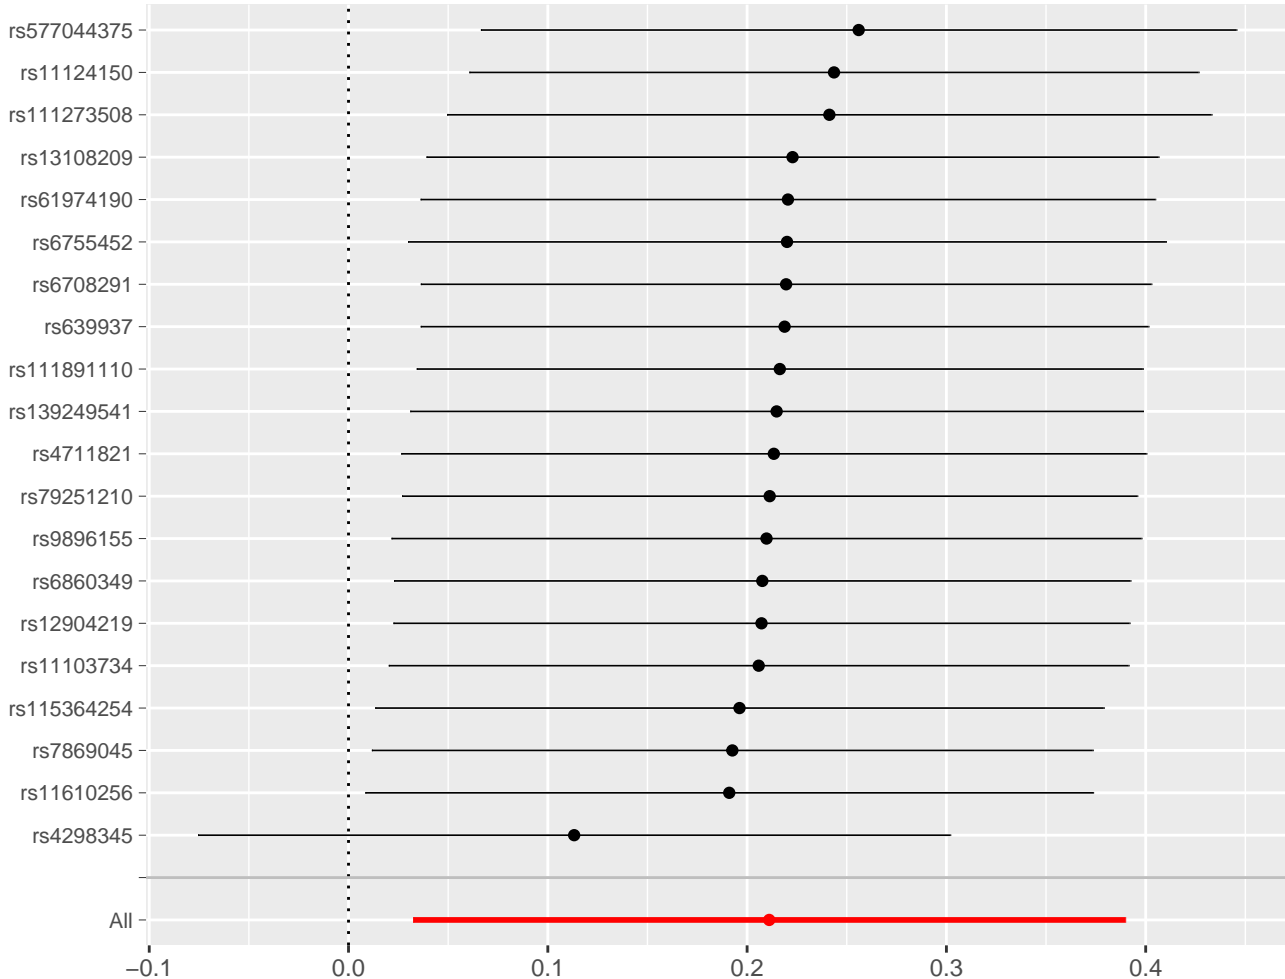

MR leave-one-out sensitivity analysis for 'DN (CD4-CD8-) AC' on 'Juvenile arthritis'

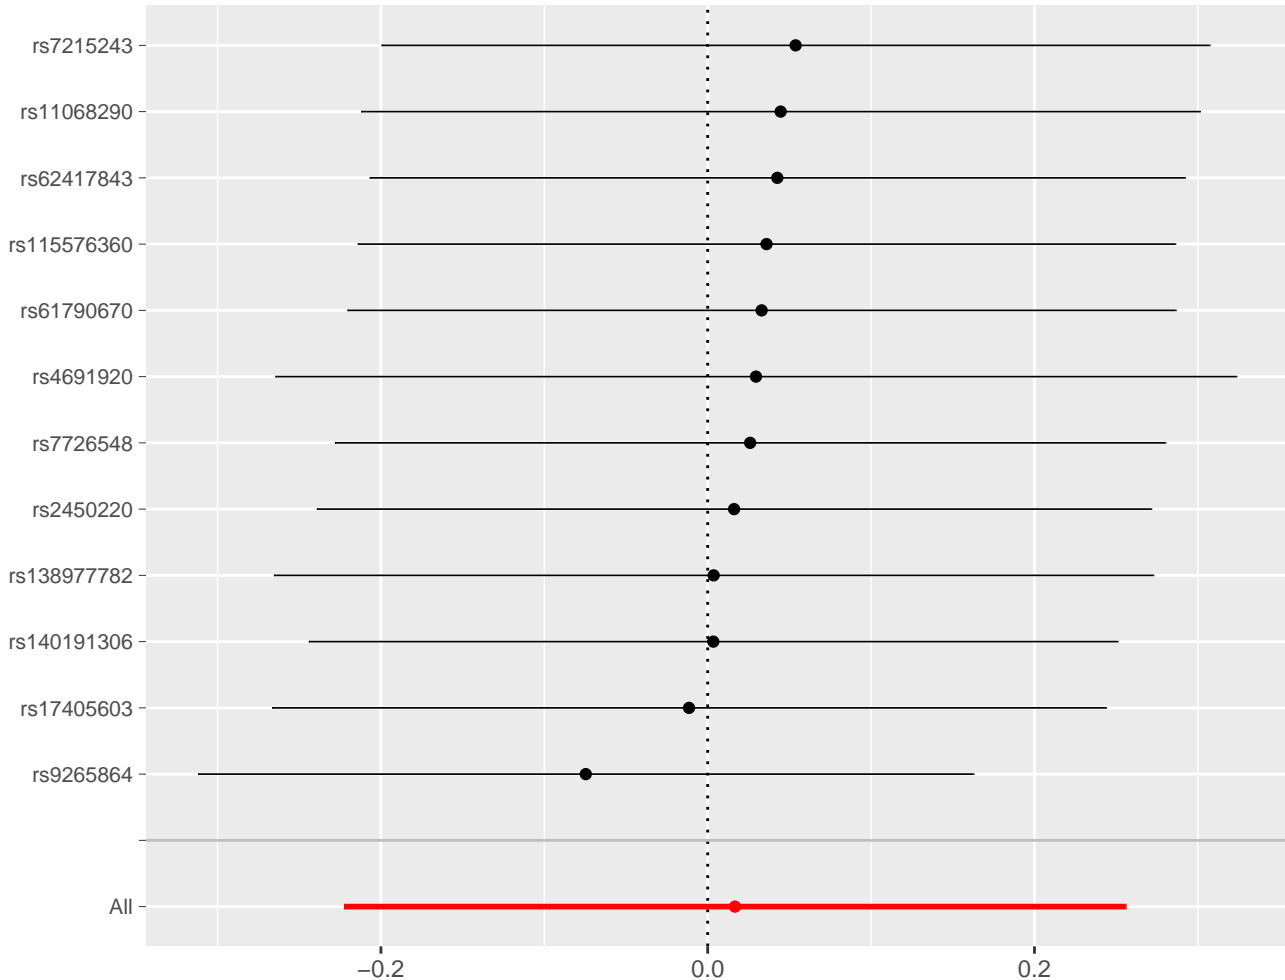

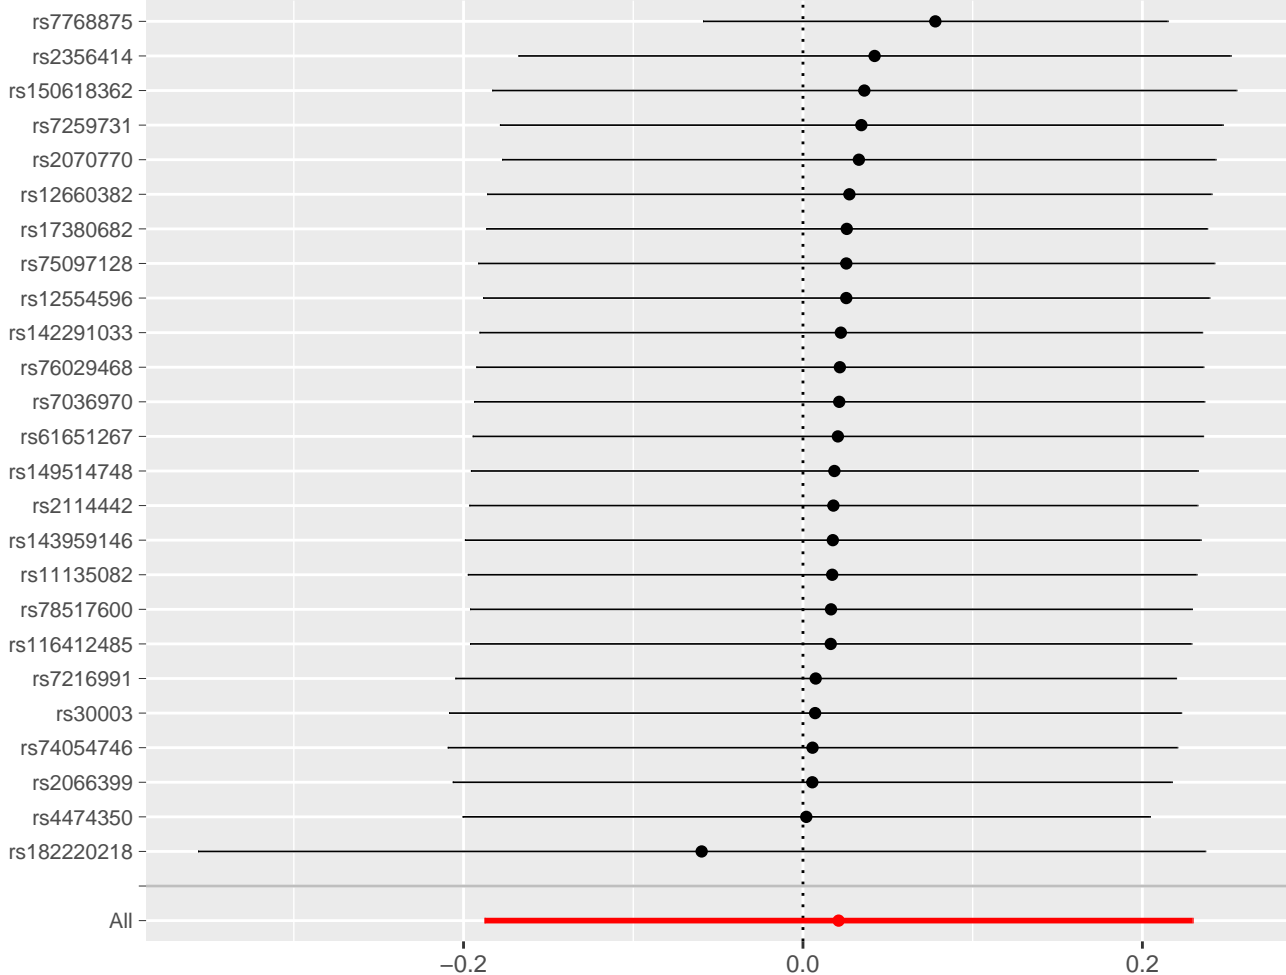

MR leave-one-out sensitivity analysis for 'CD20 on IgD+ CD38-' on 'Juvenile arthritis'

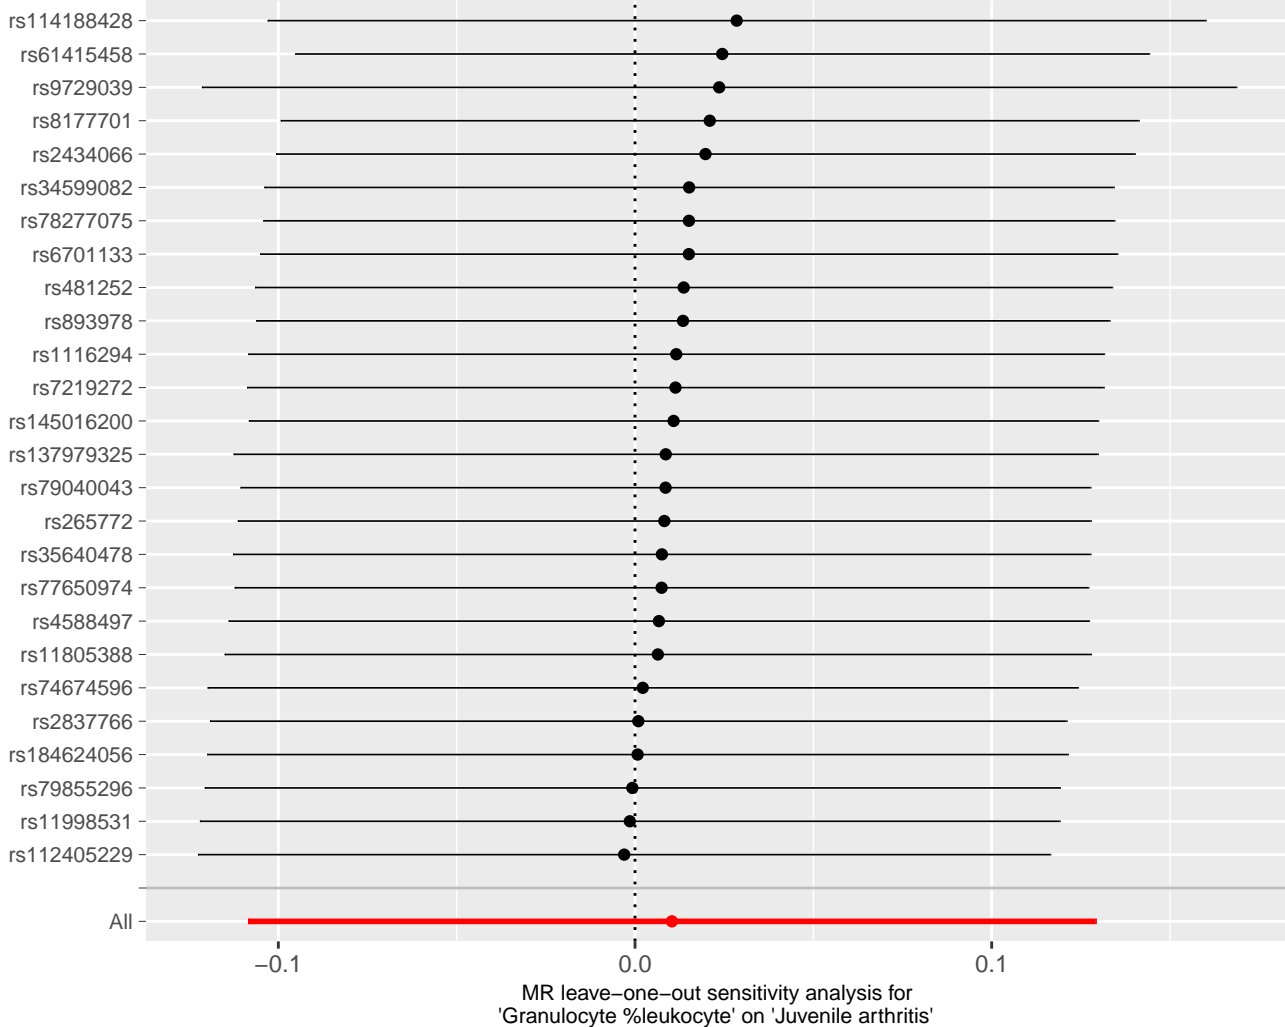

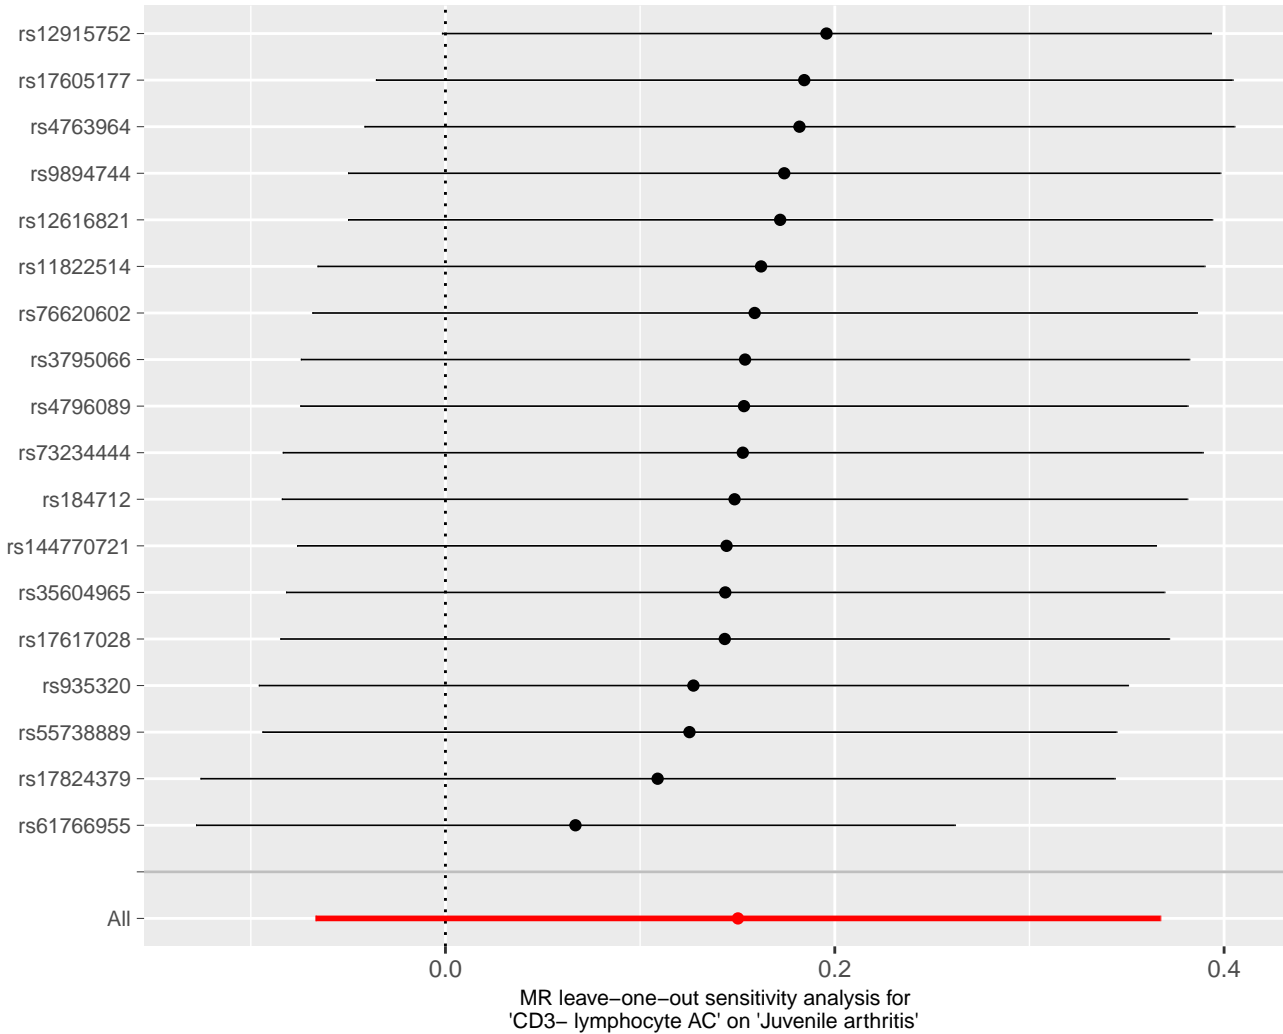

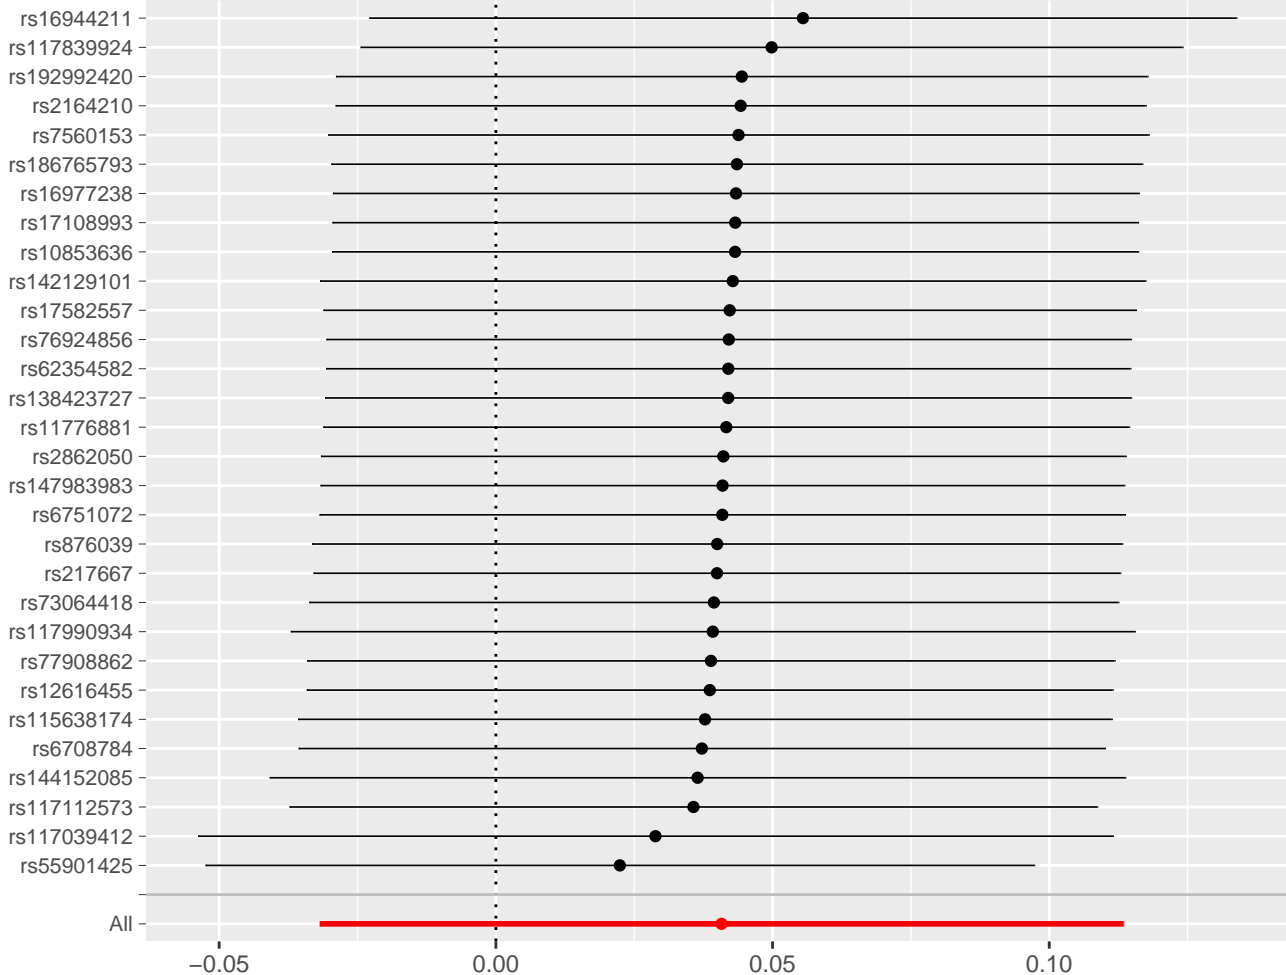

MR leave-one-out sensitivity analysis for 'Plasmacytoid DC AC' on 'Juvenile arthritis'



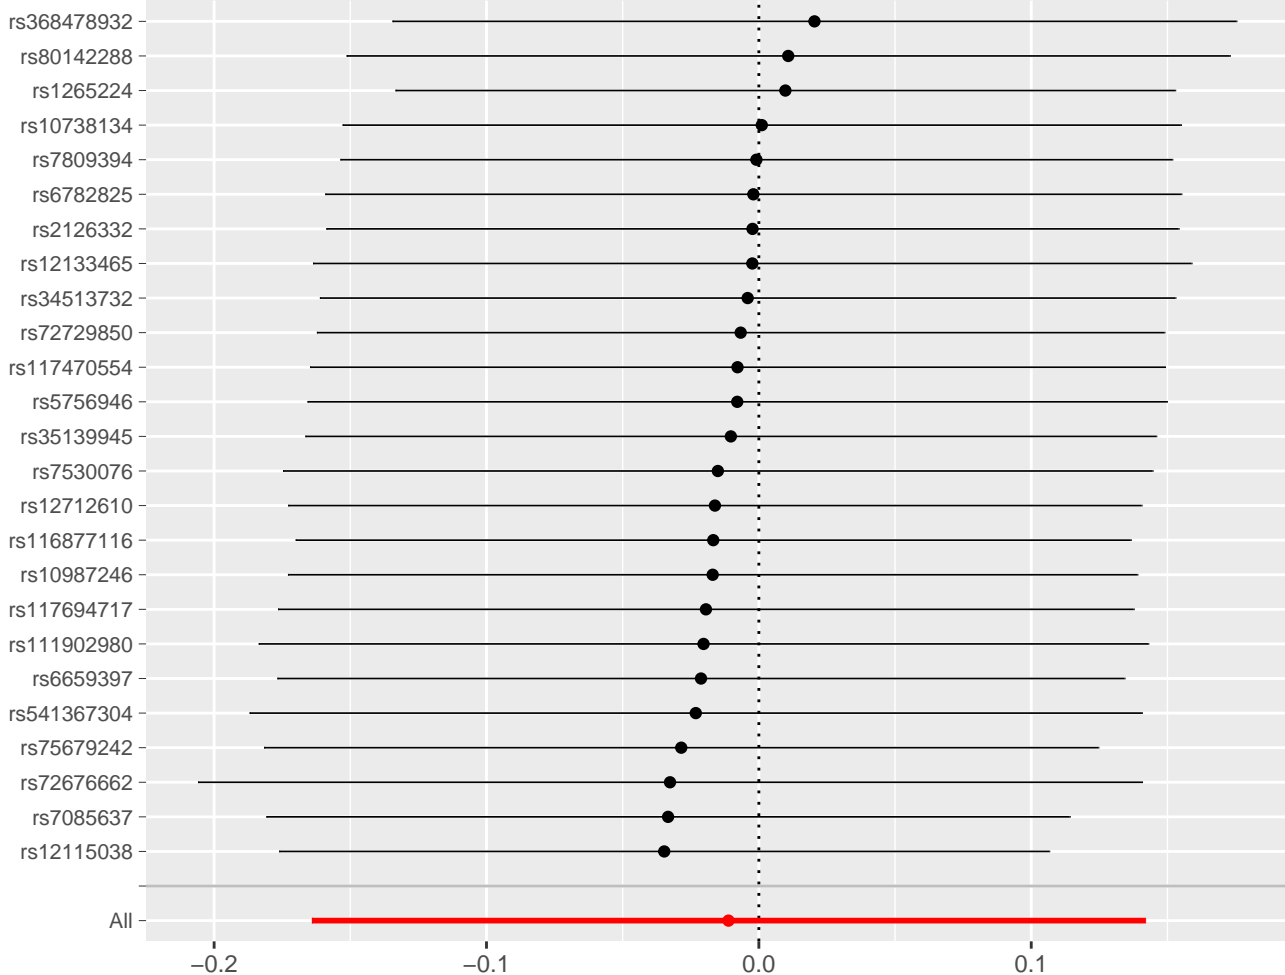

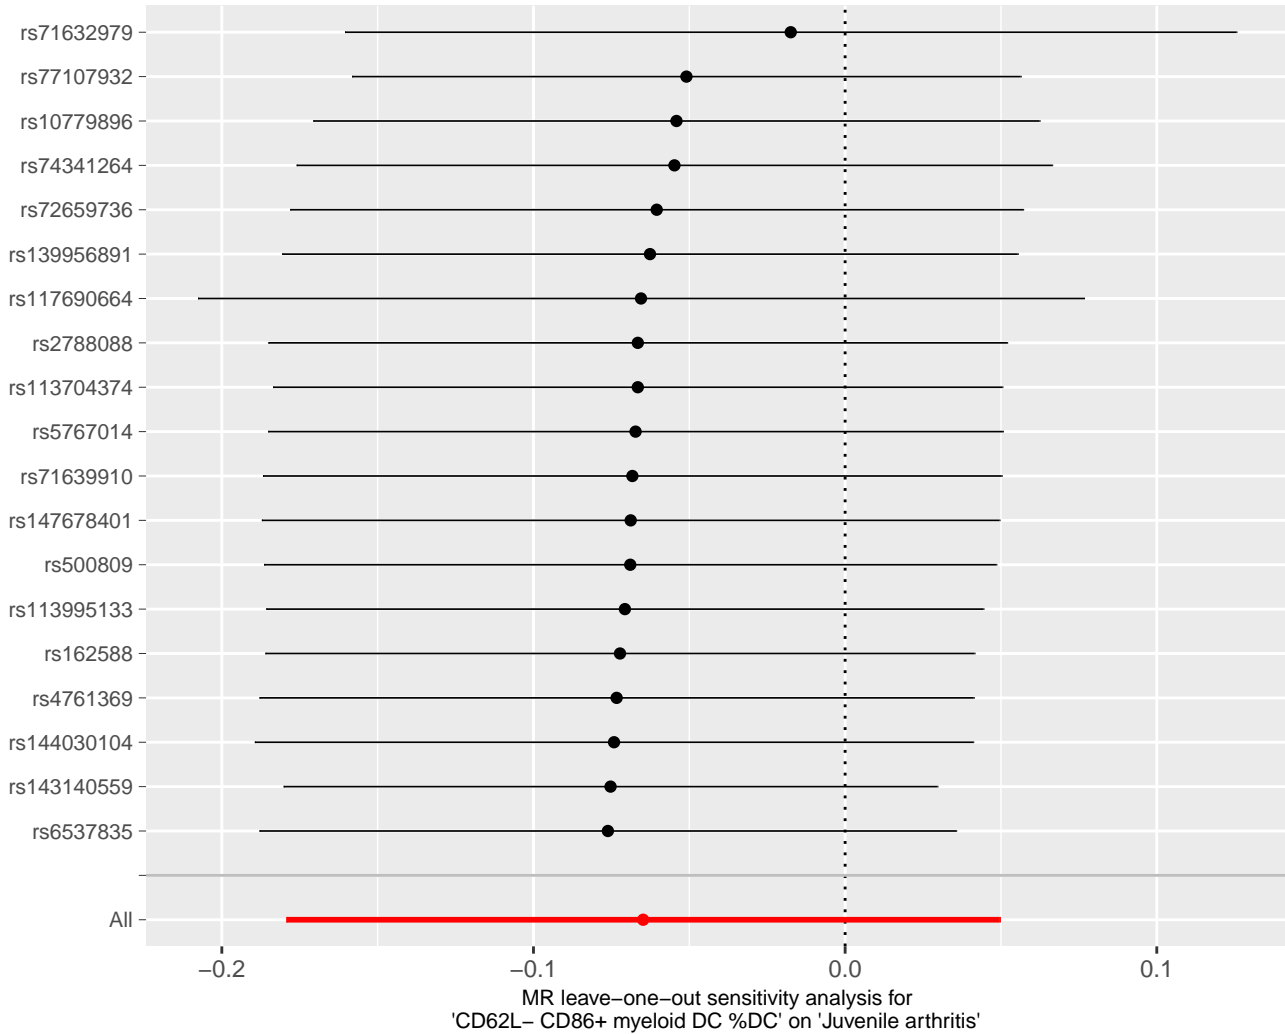

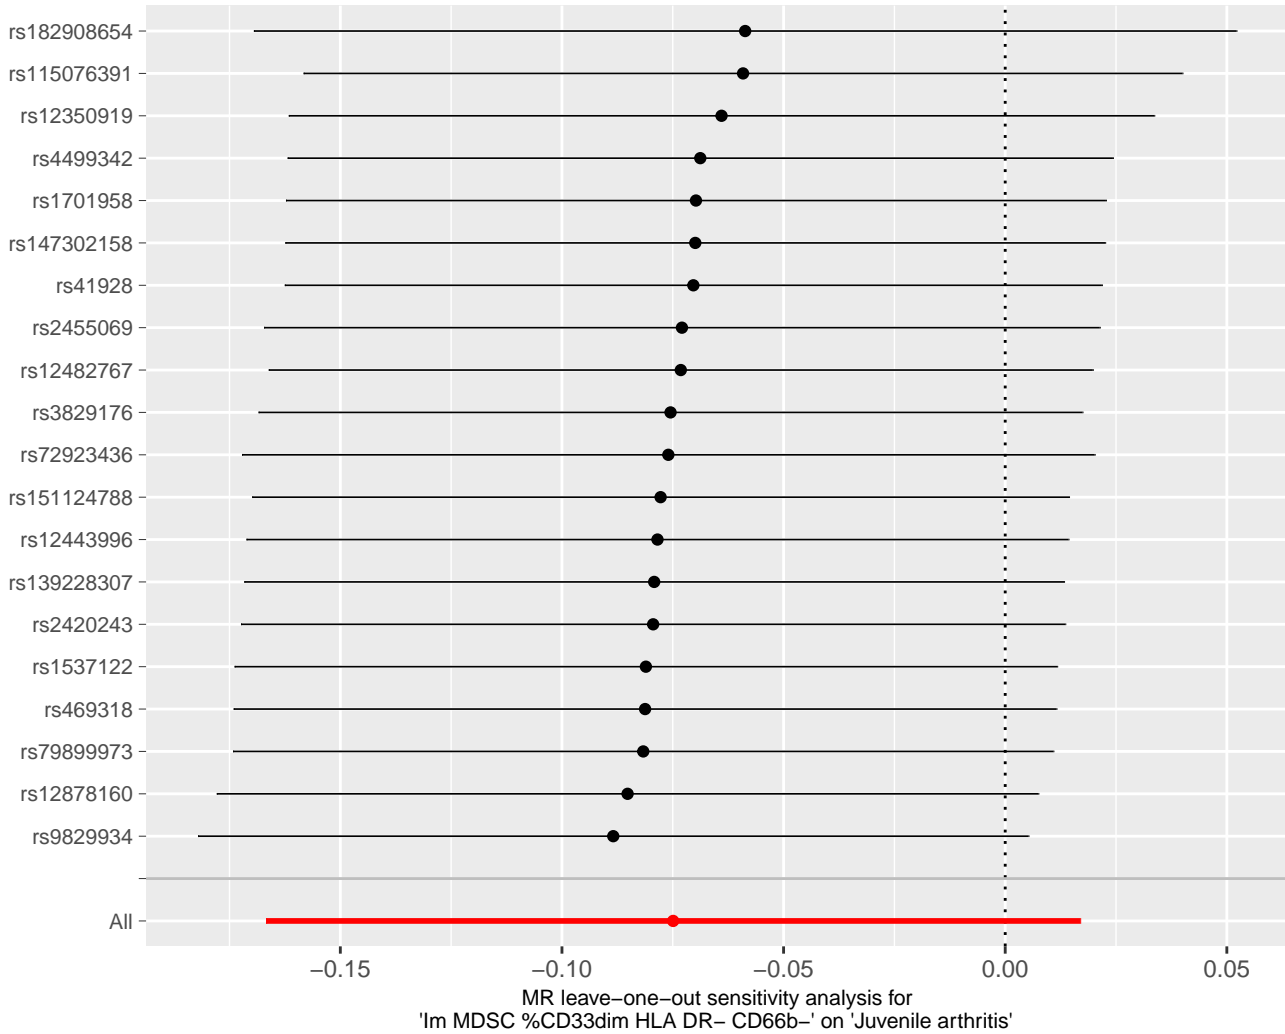

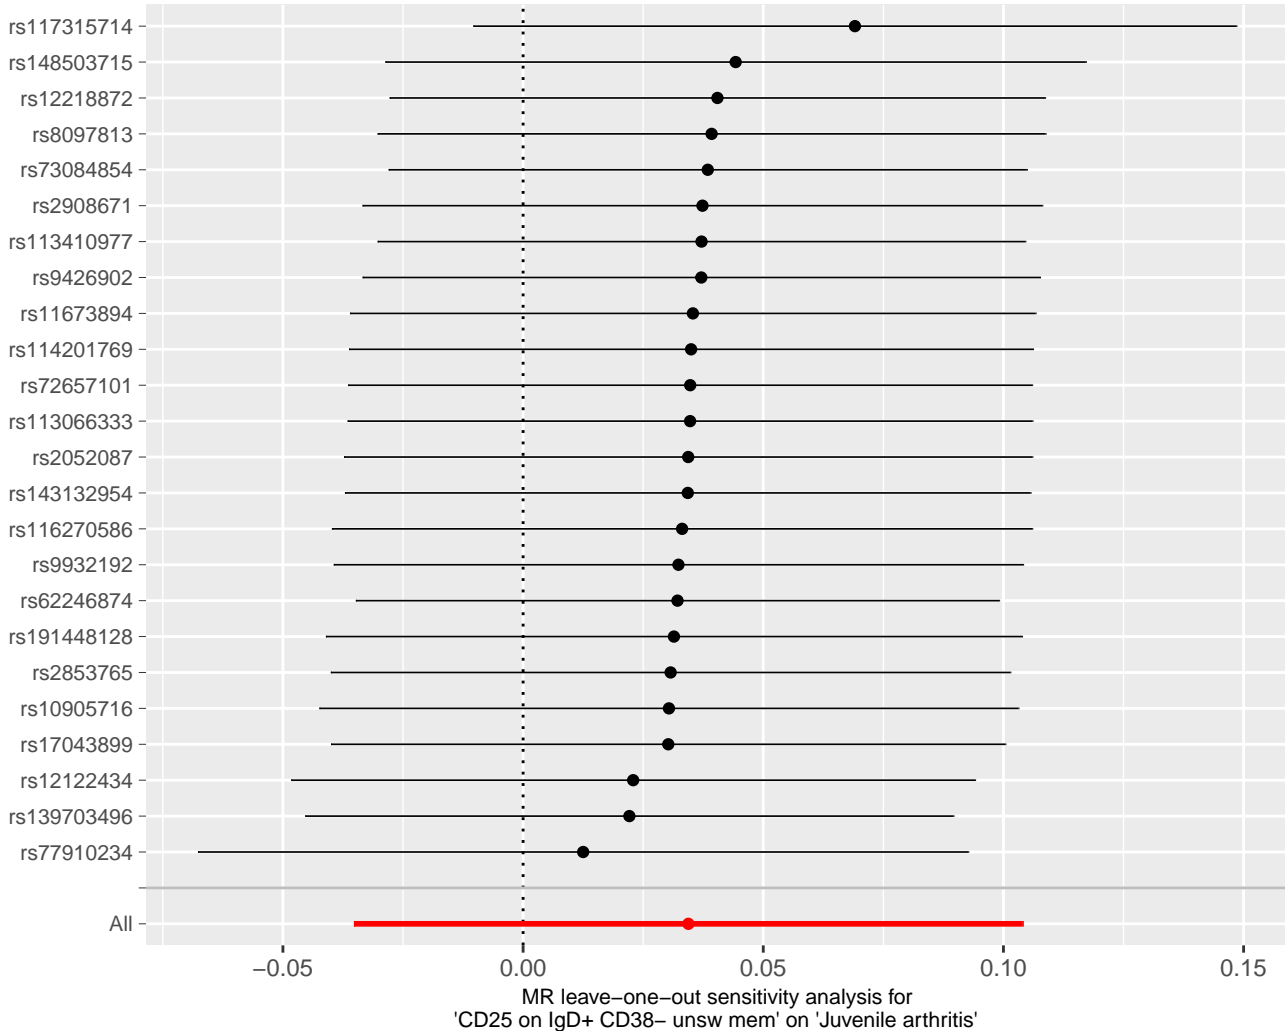

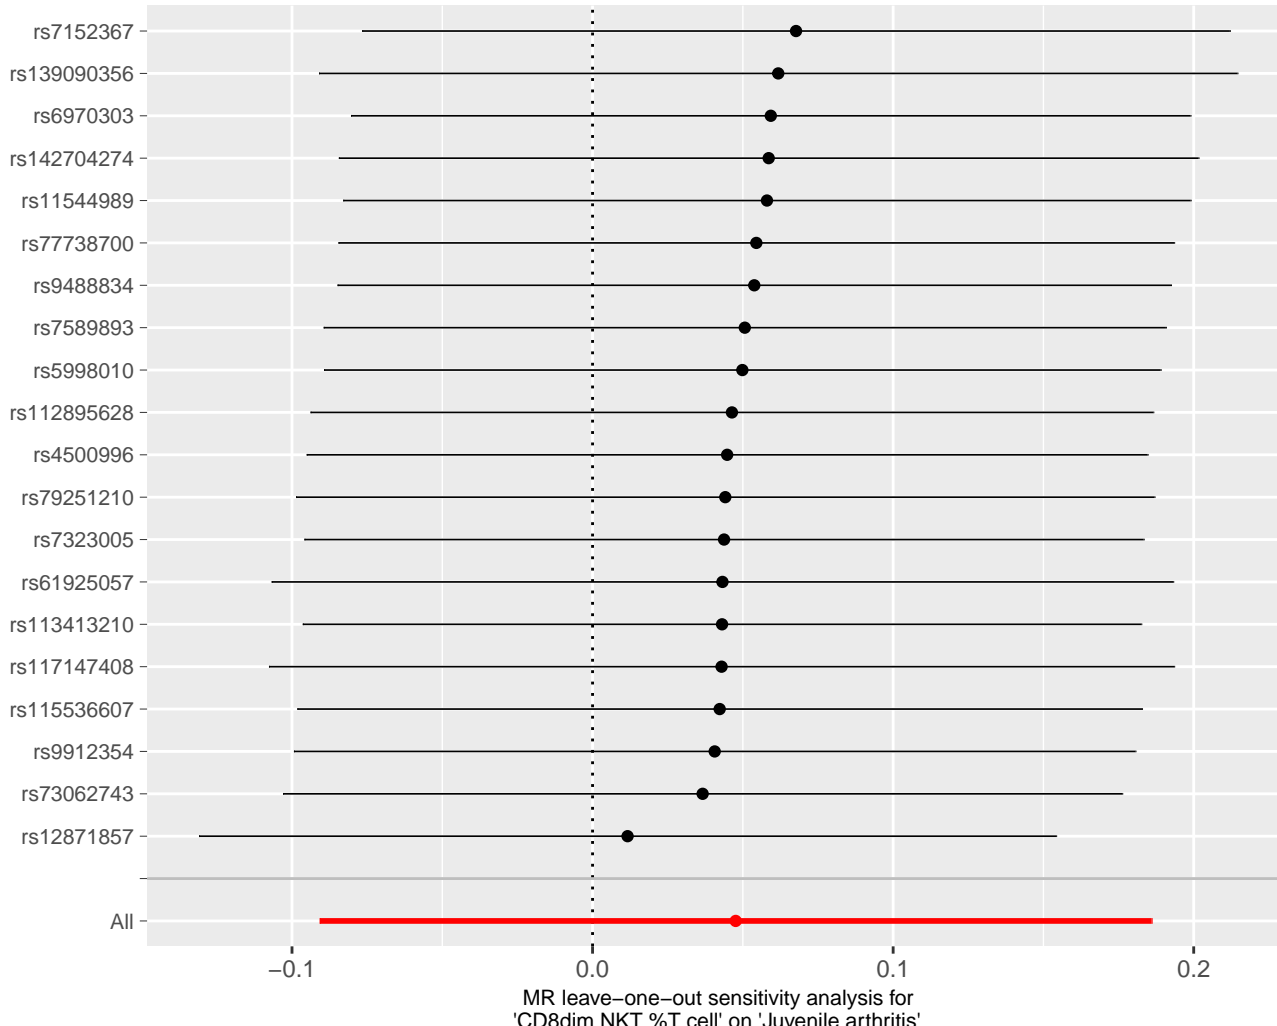

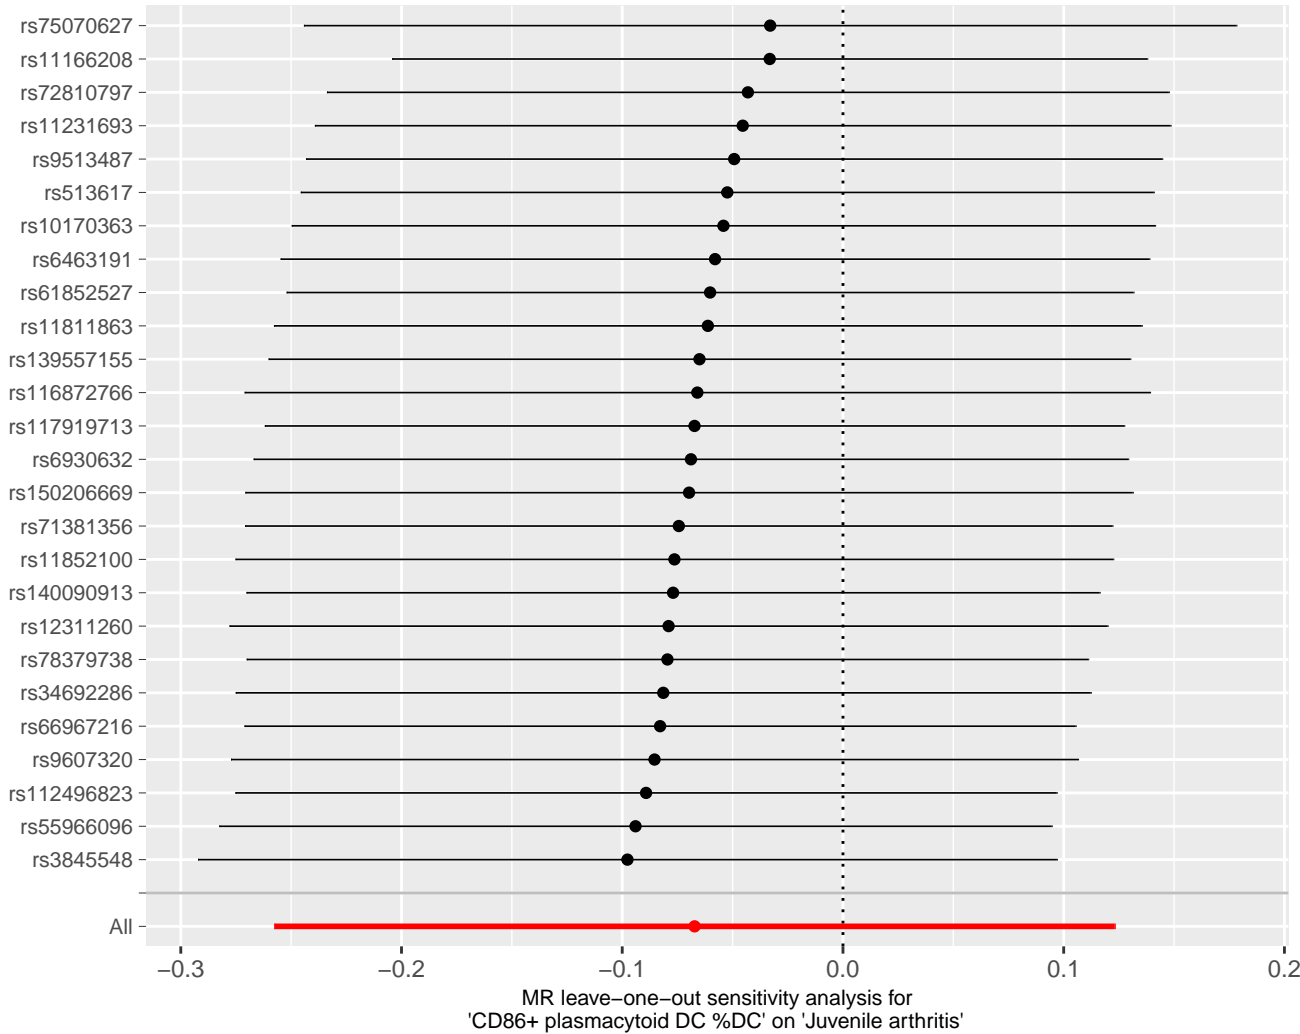

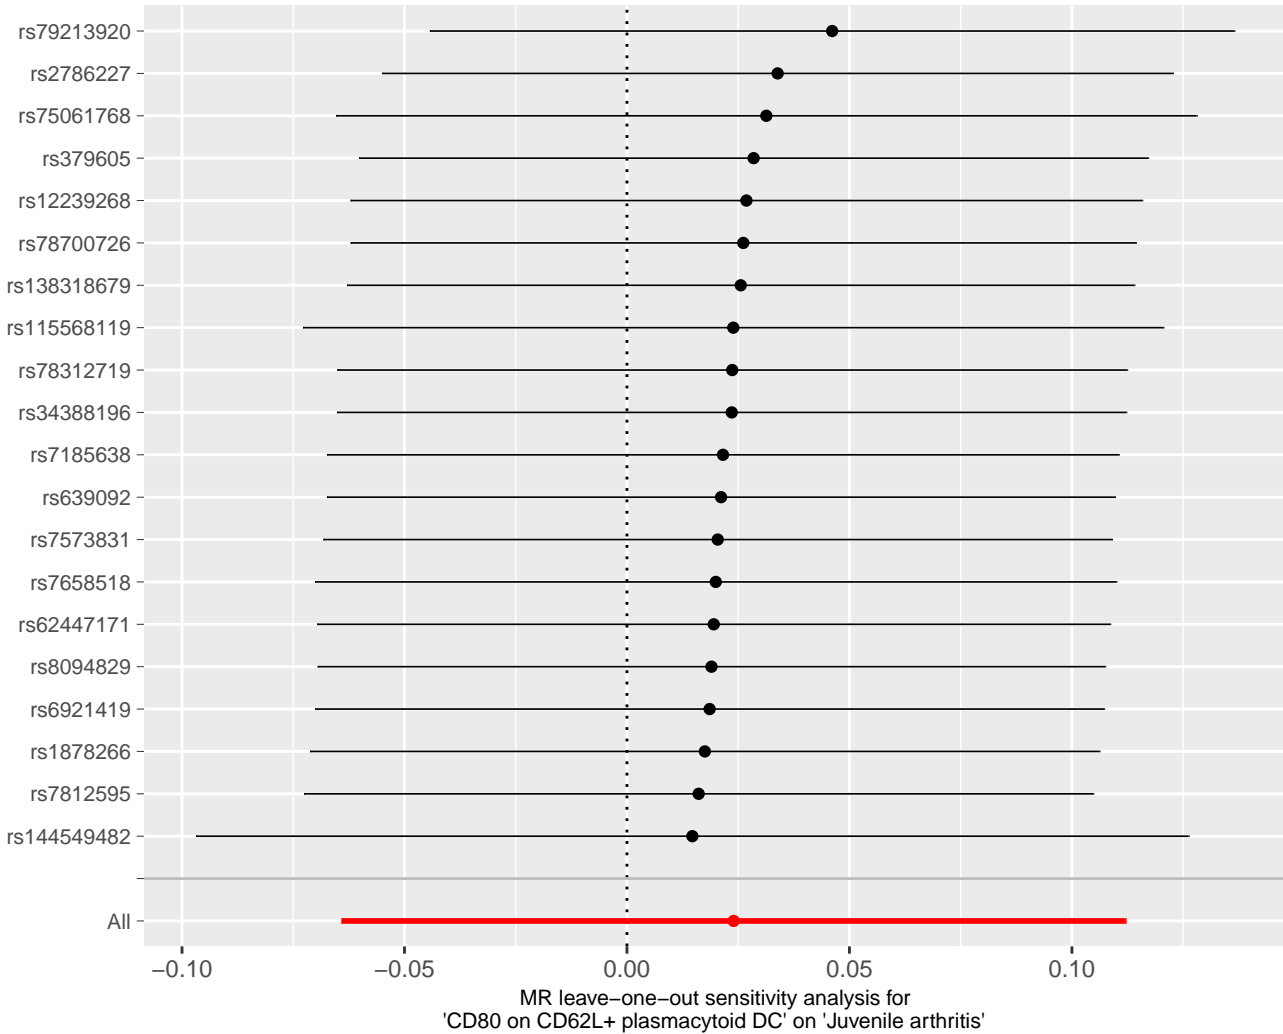

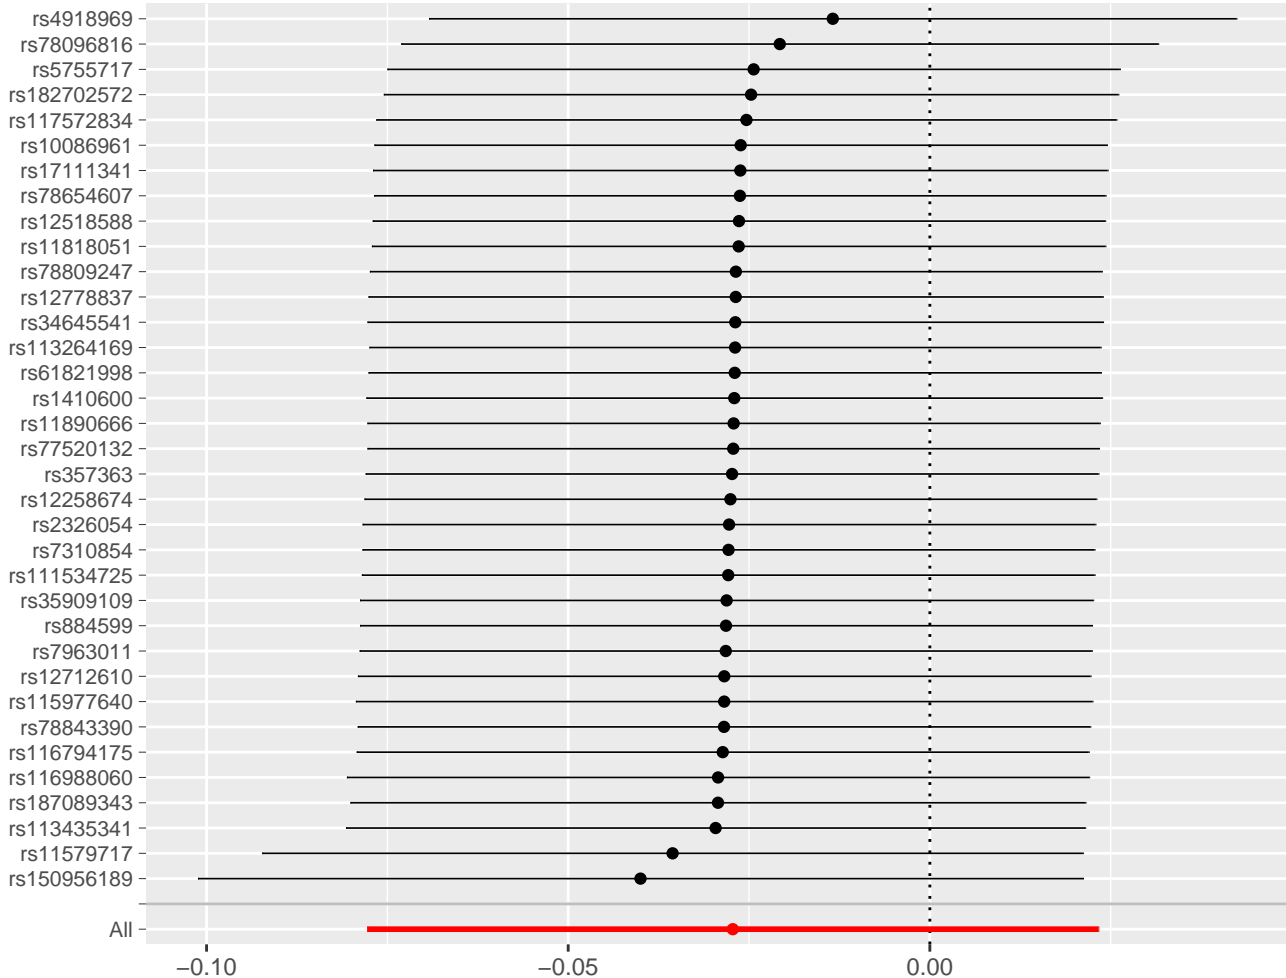



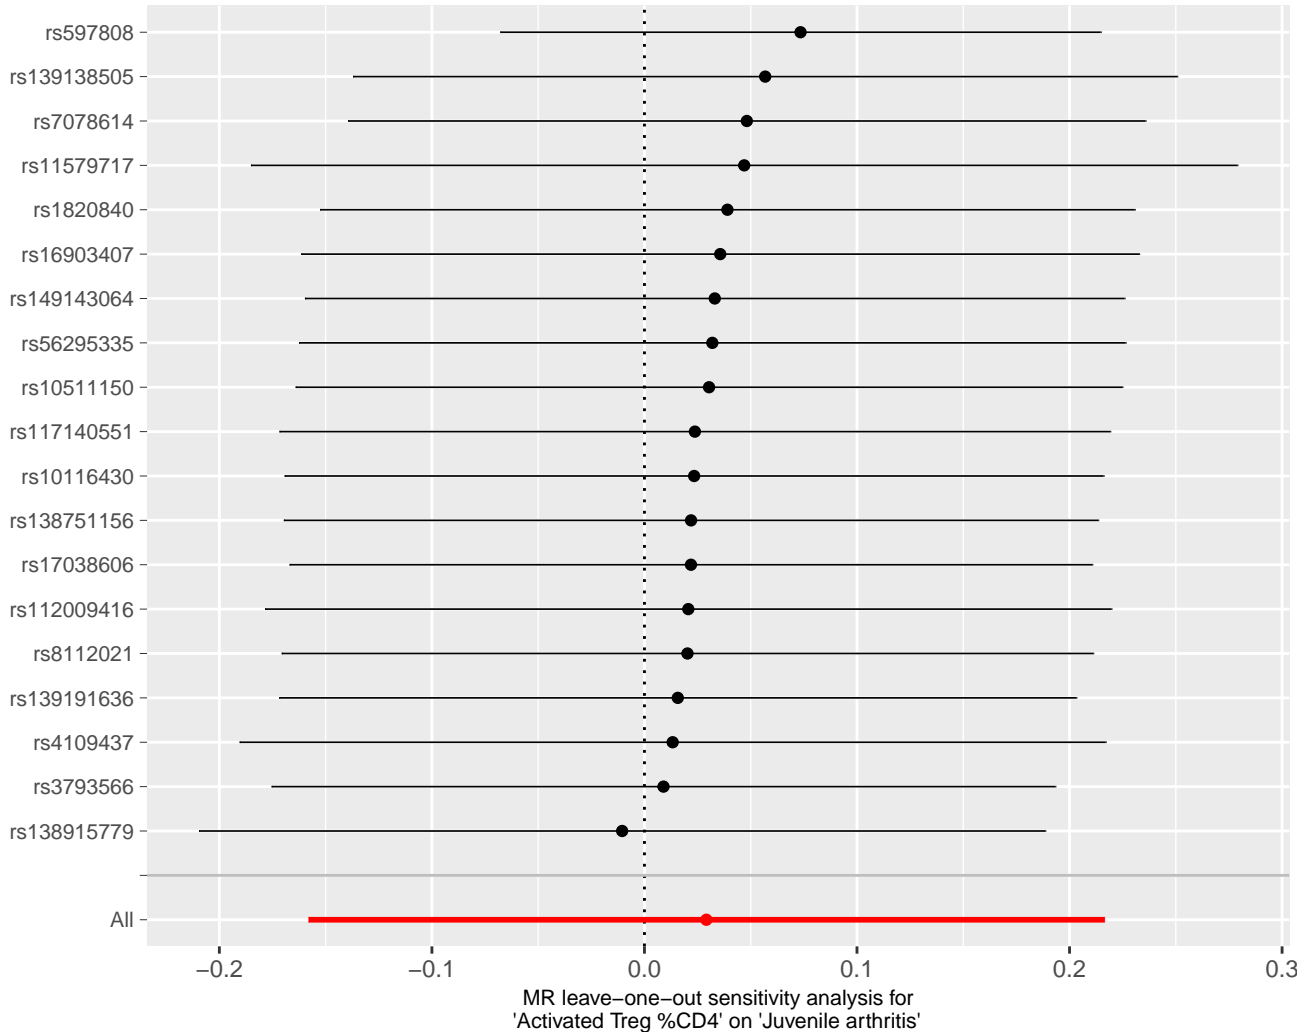

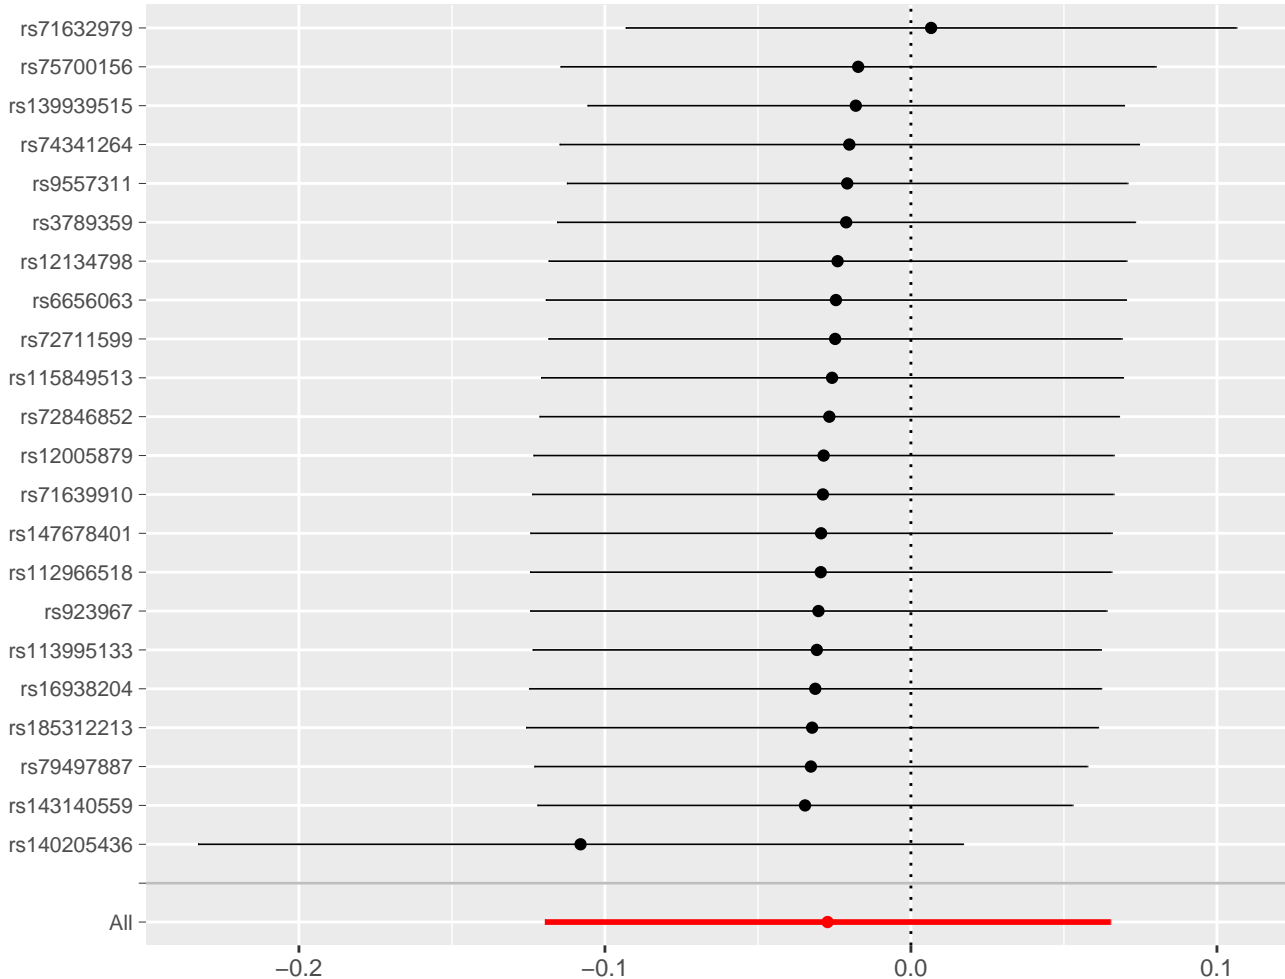

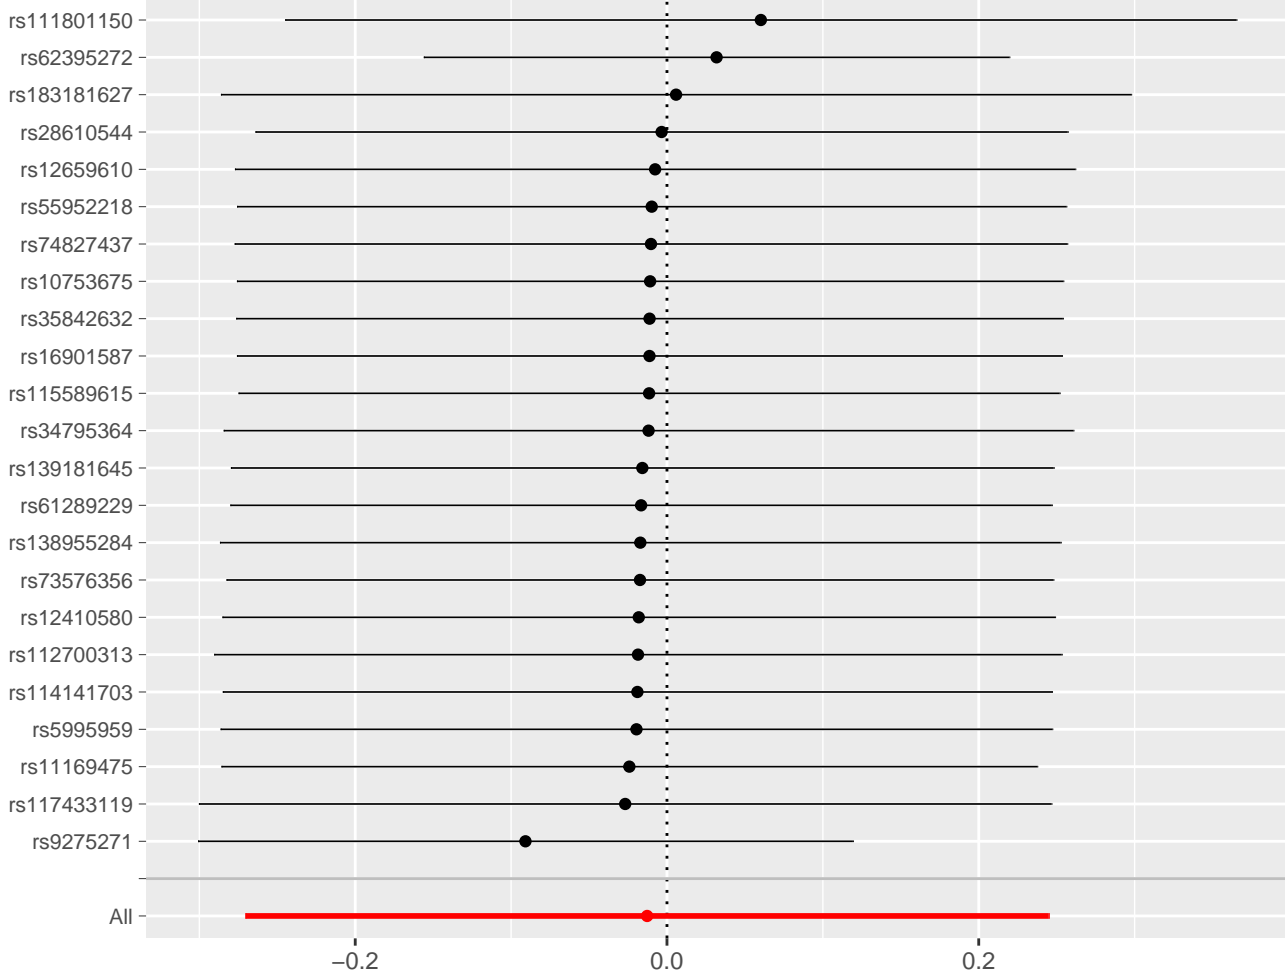

MR leave-one-out sensitivity analysis for 'HLA DR++ monocyte AC' on 'Juvenile arthritis'

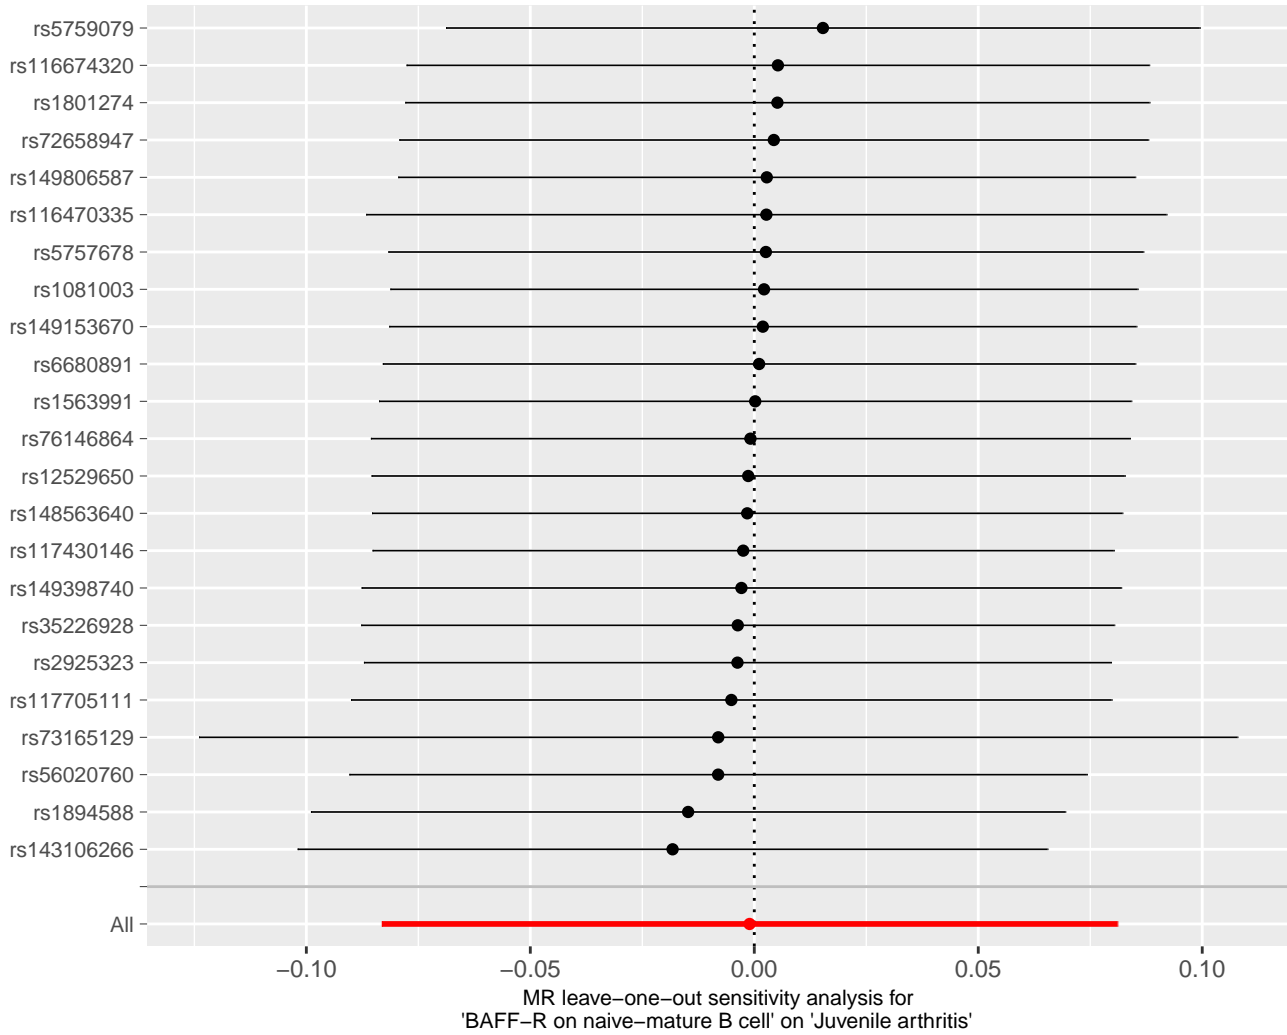

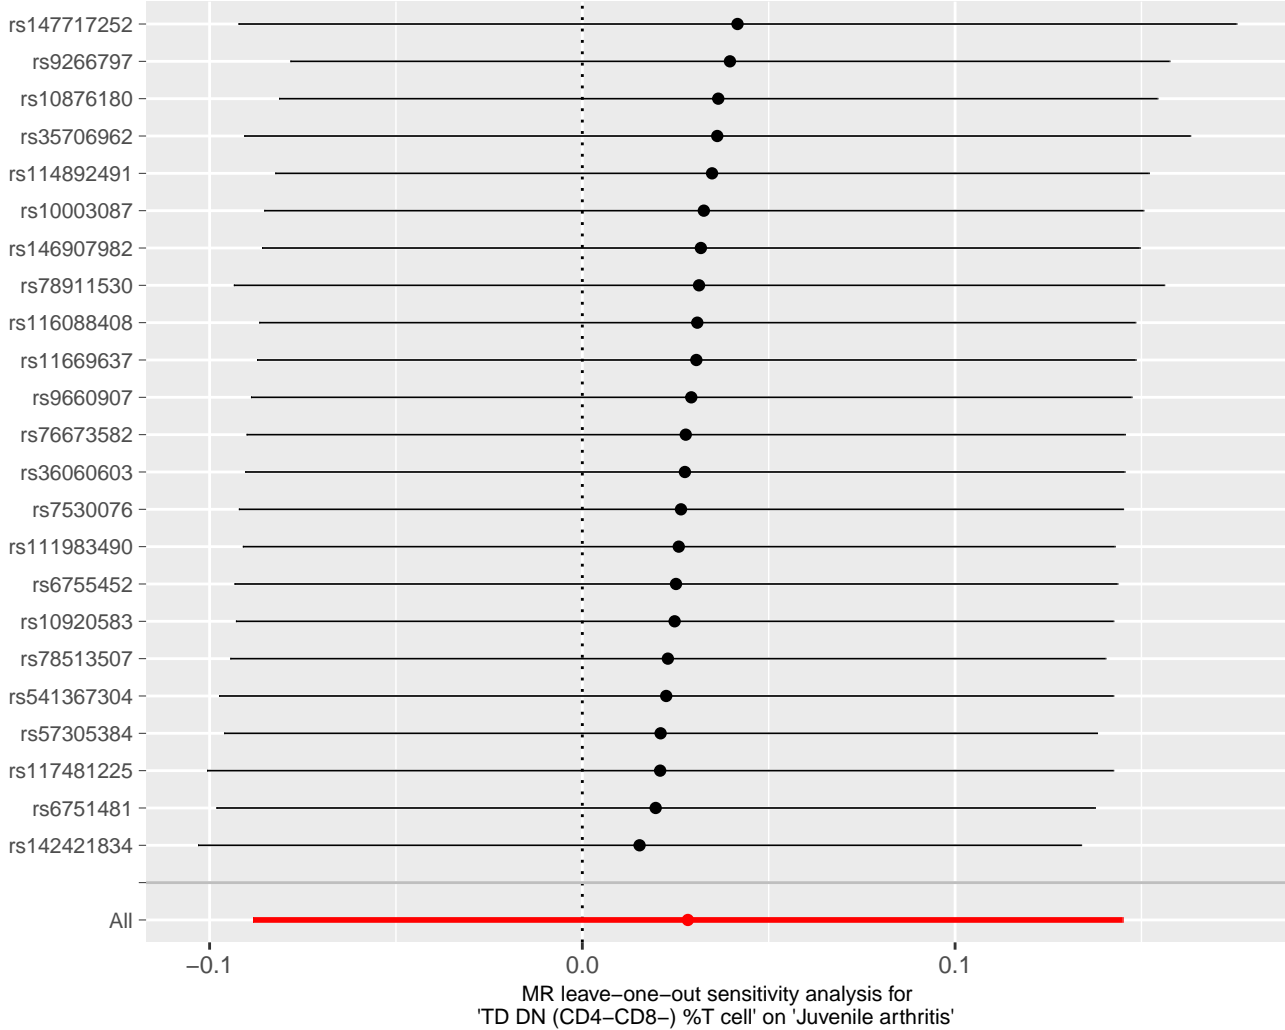

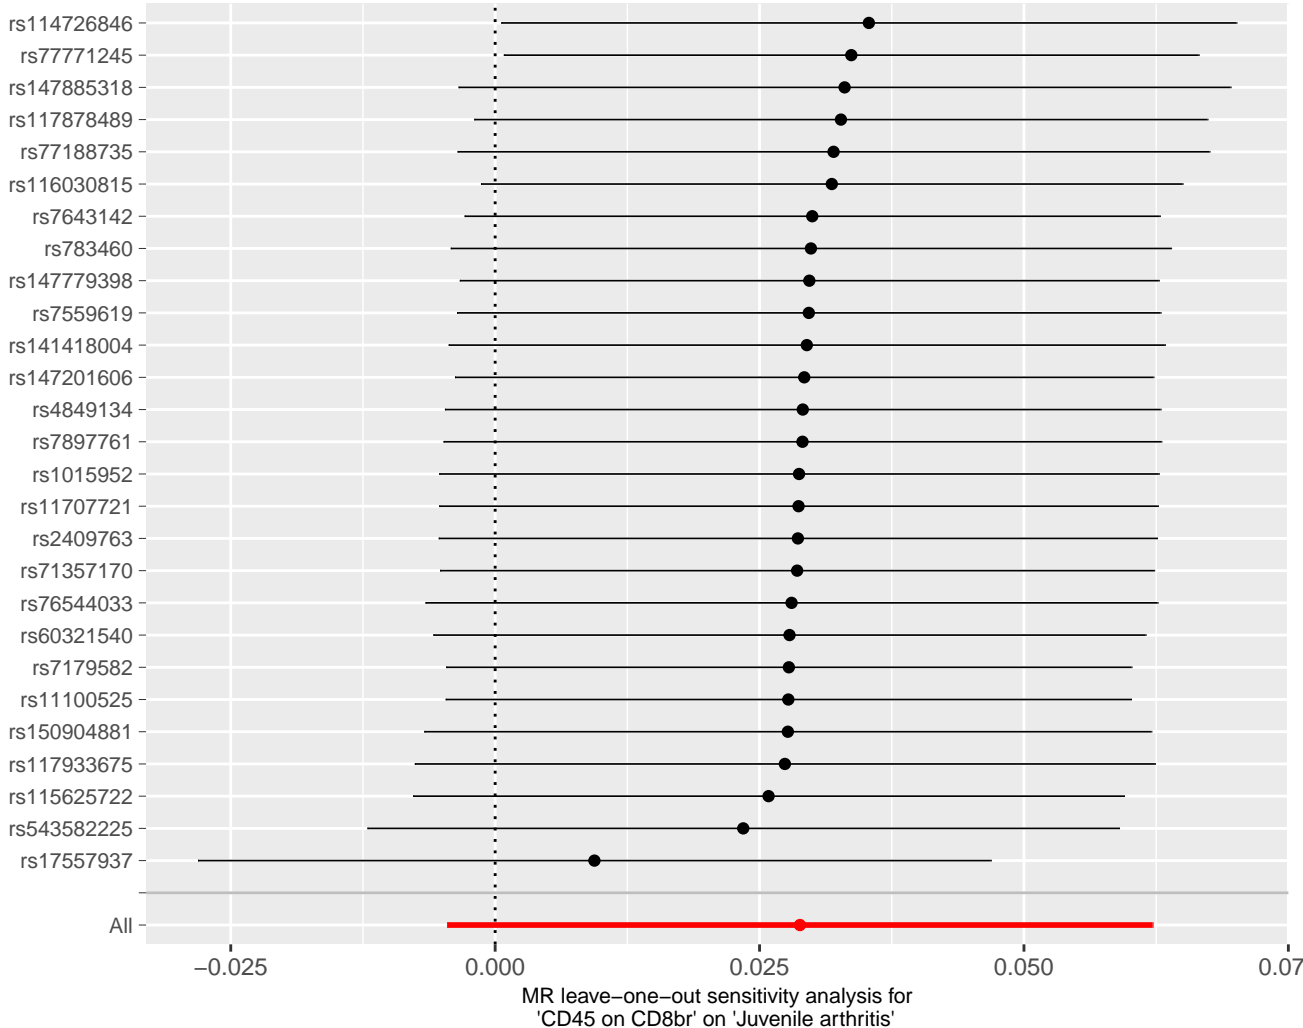

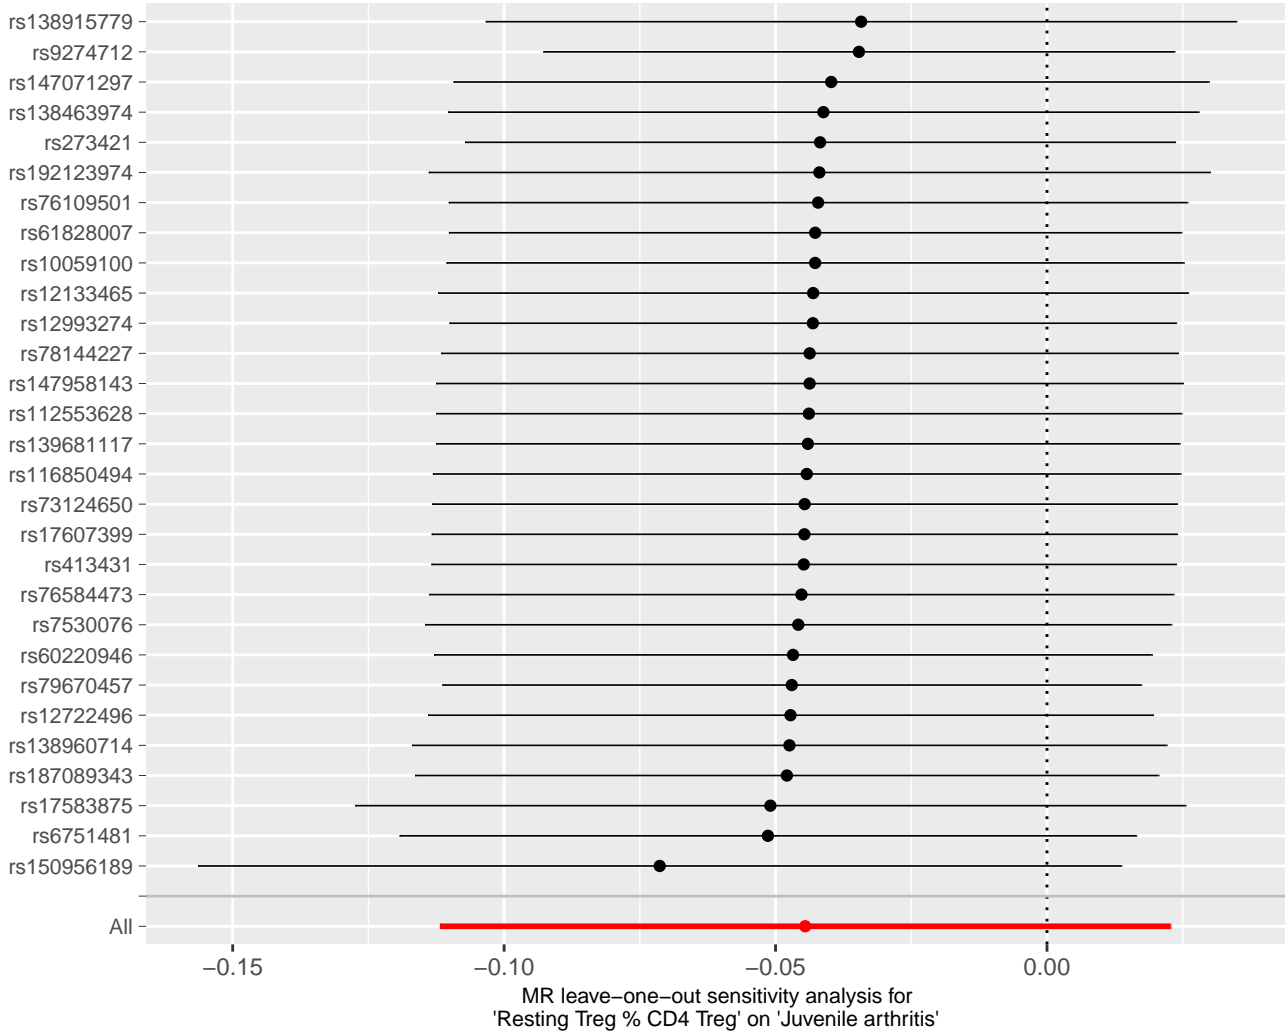

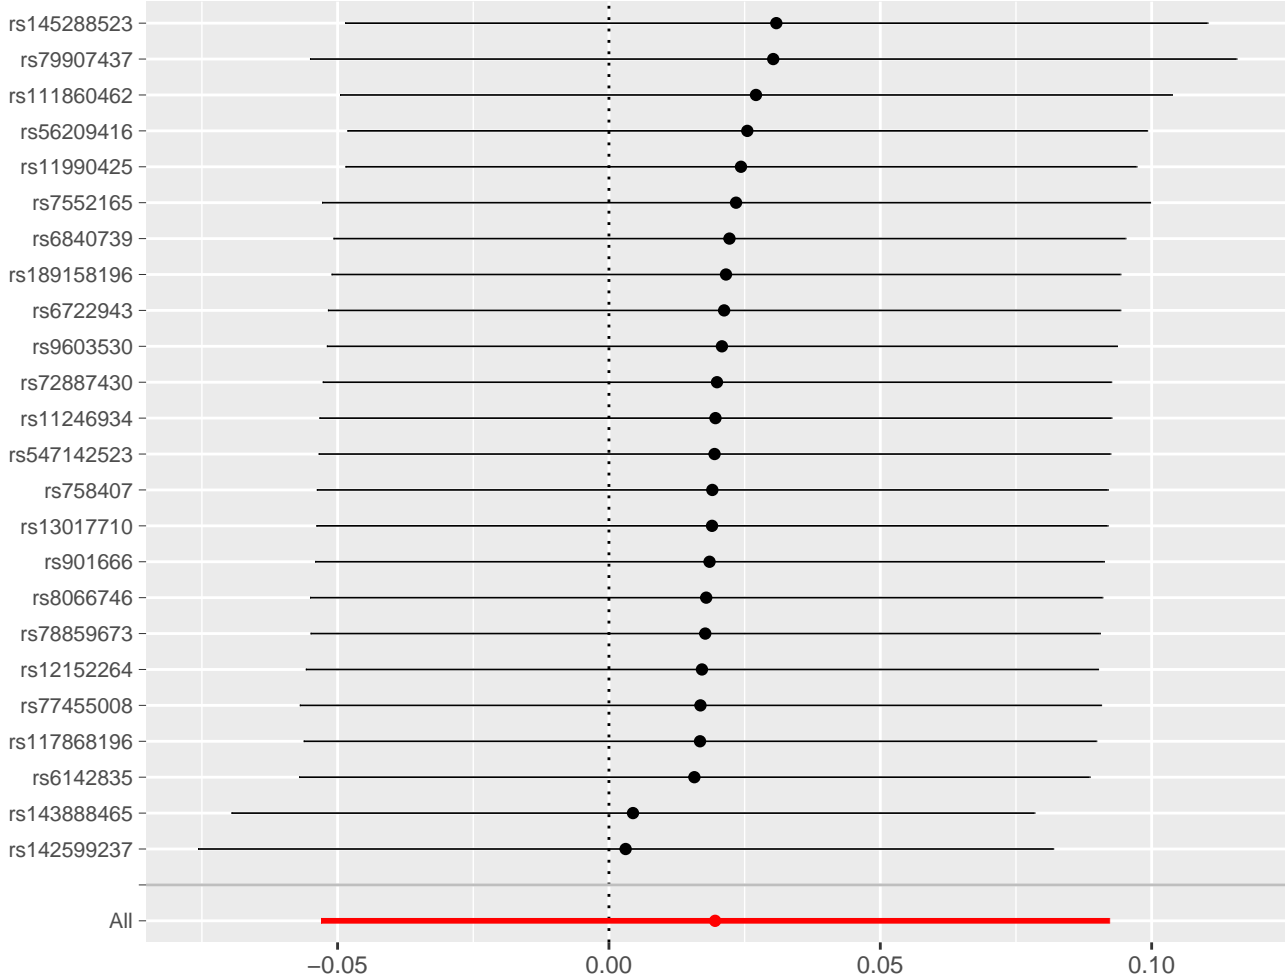

MR leave-one-out sensitivity analysis for 'CD28 on CD4 Treg' on 'Juvenile arthritis'



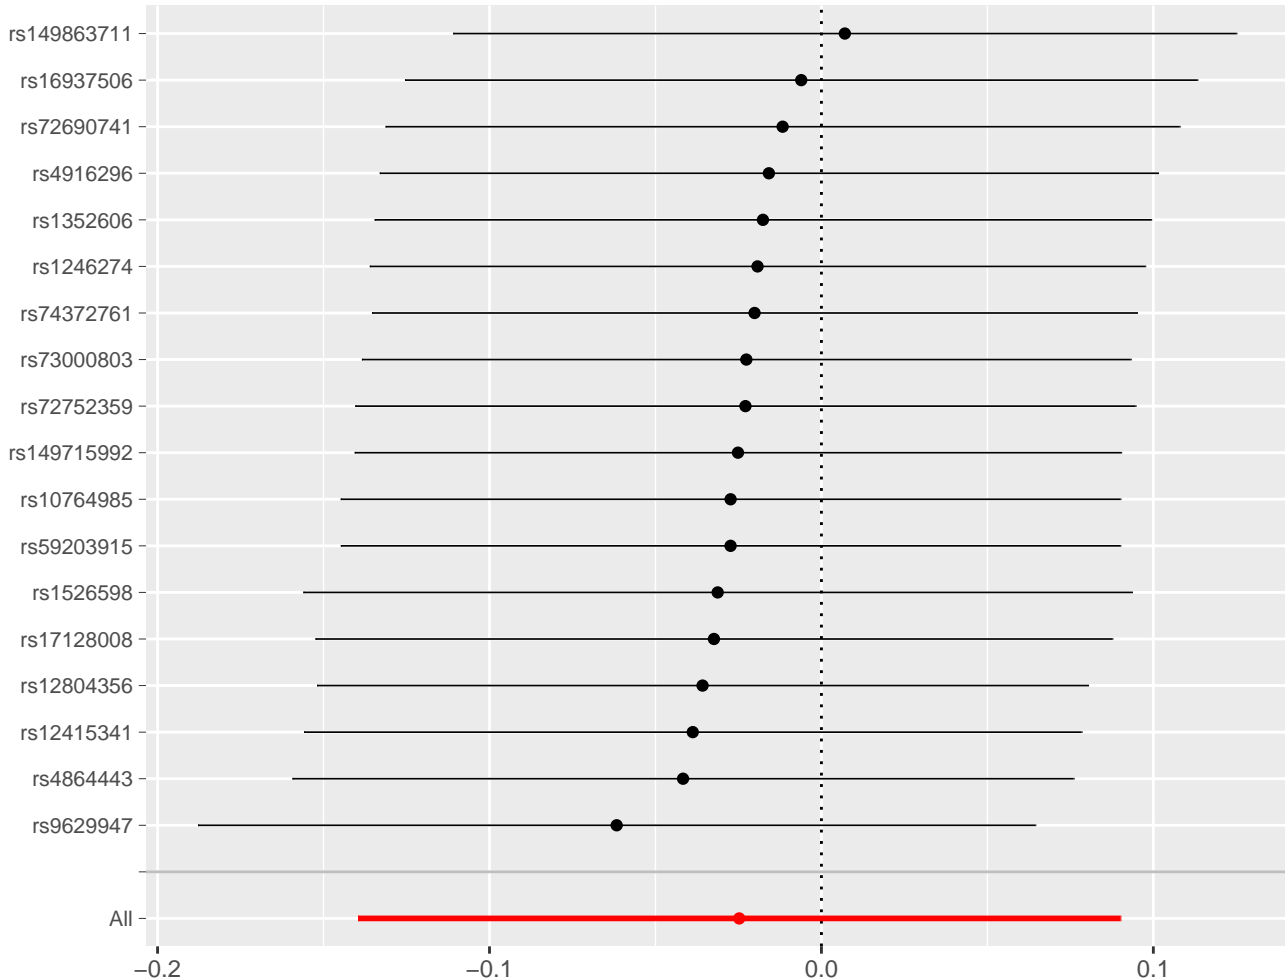

MR leave-one-out sensitivity analysis for 'CD45 on basophil' on 'Juvenile arthritis'

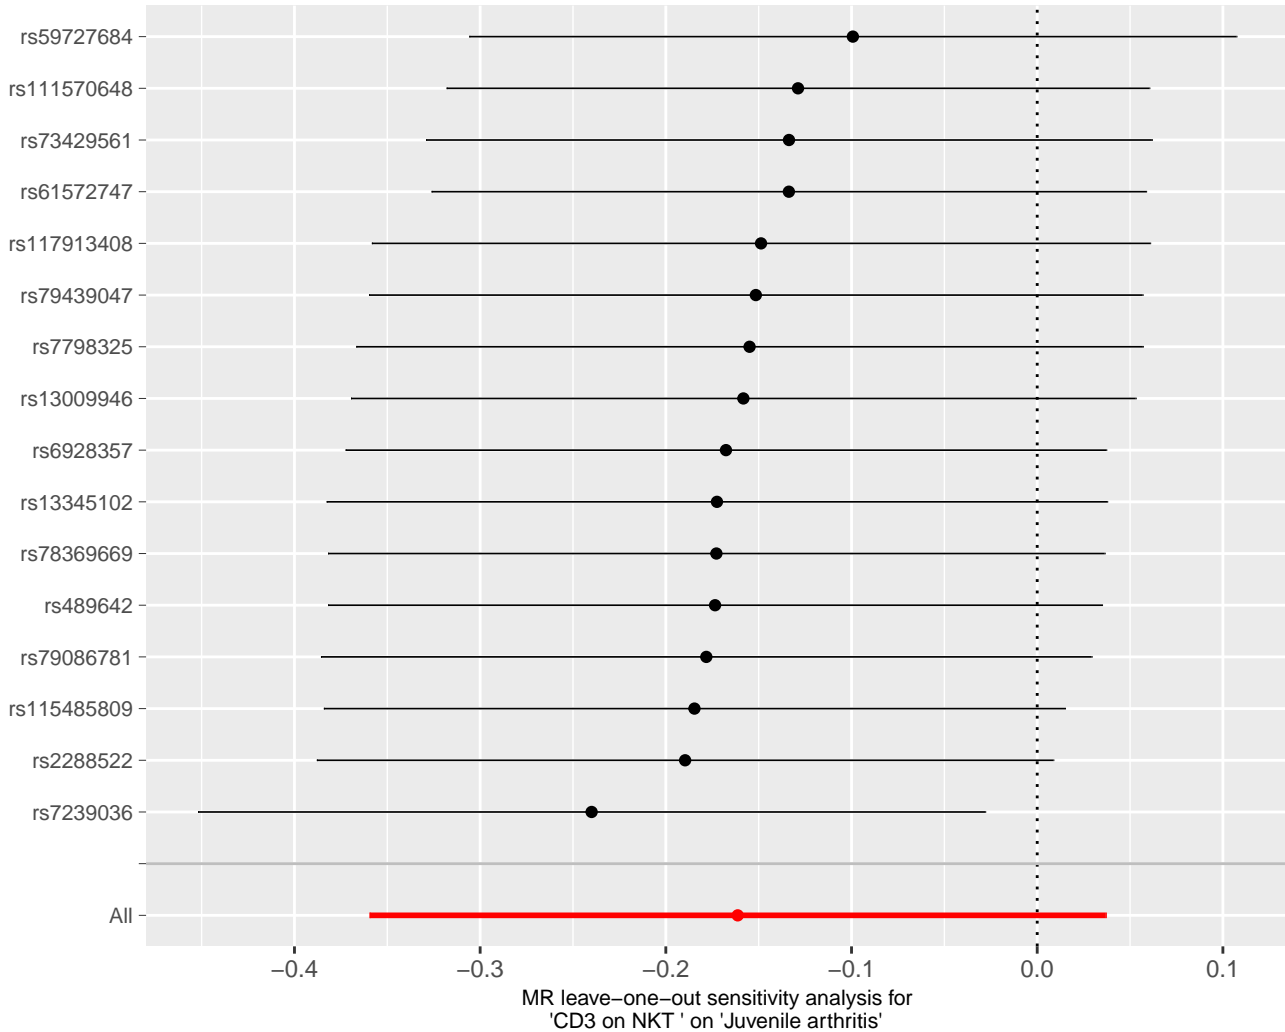

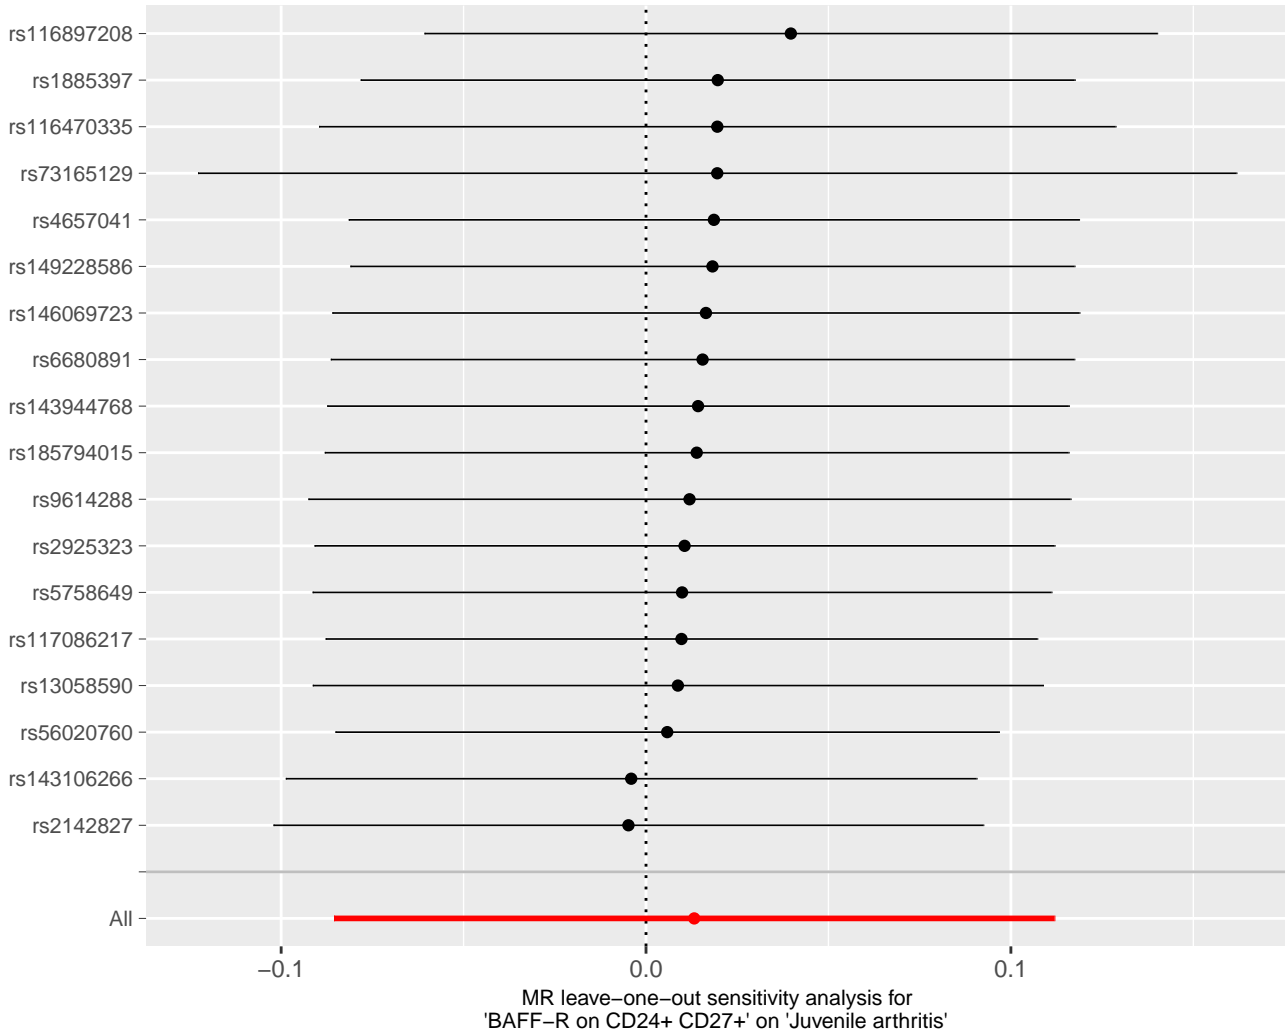

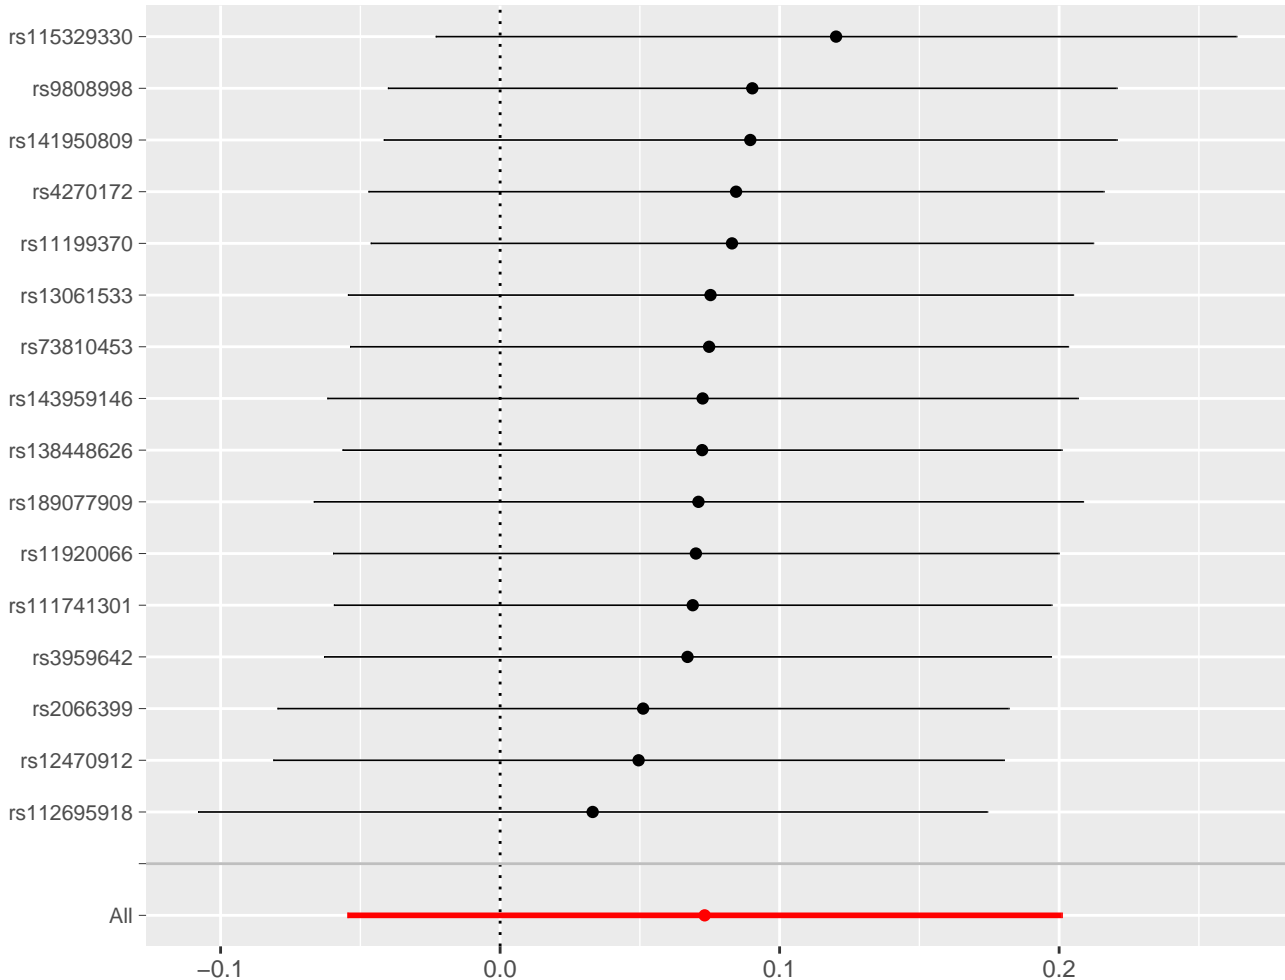

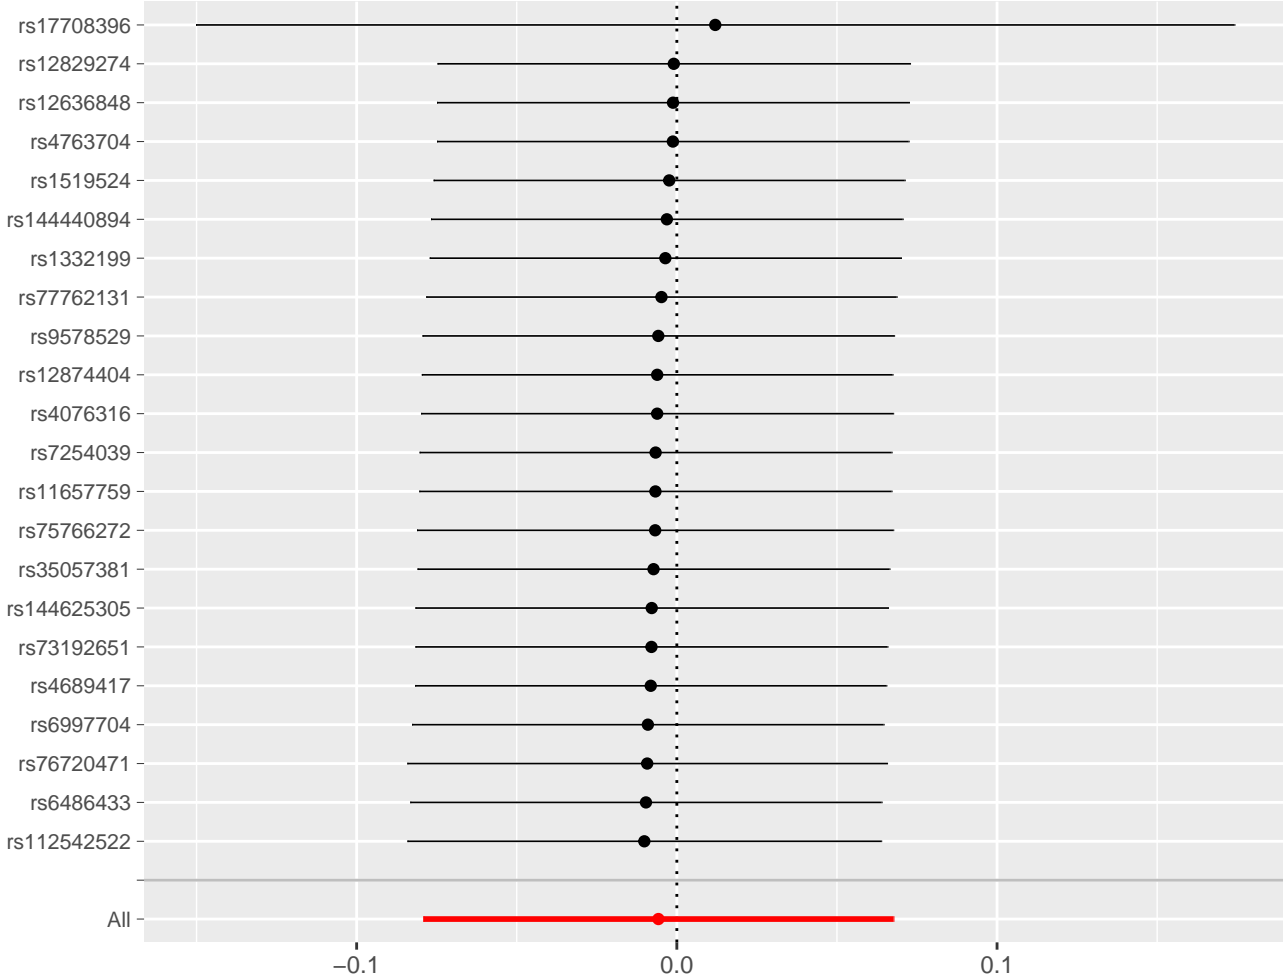

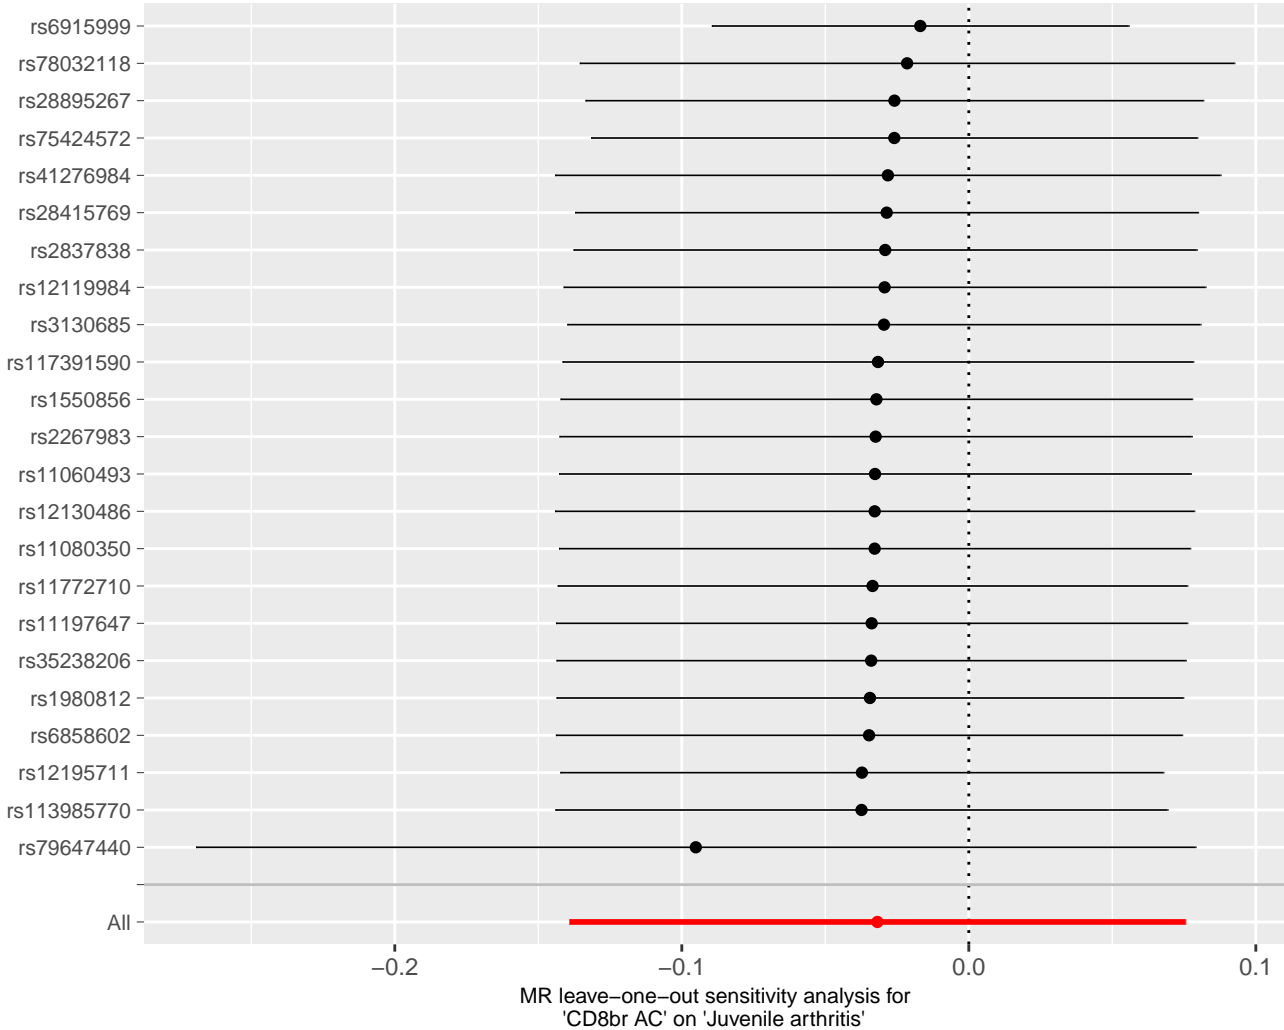

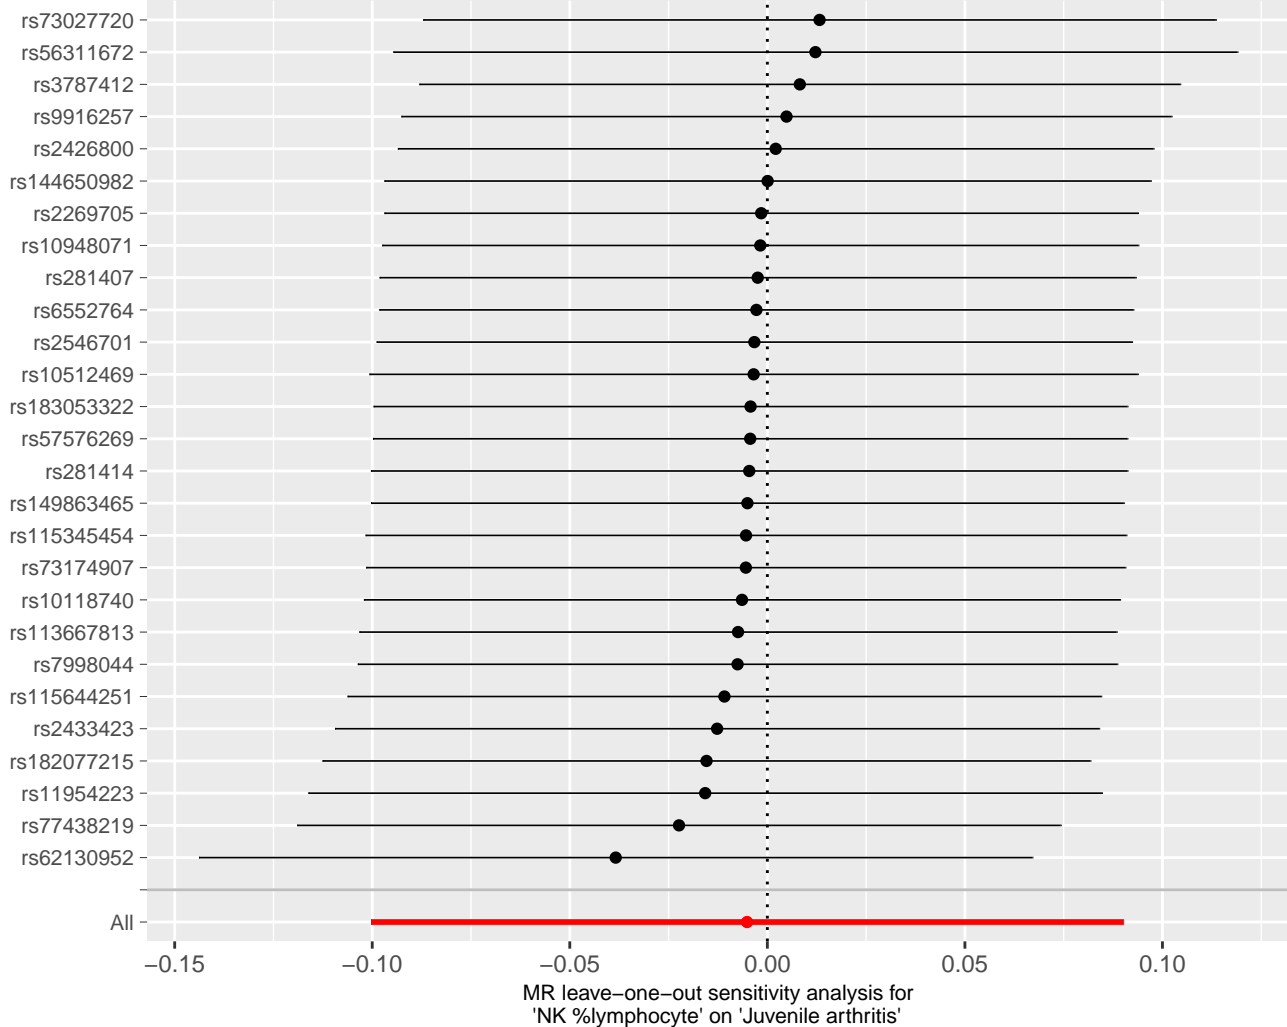

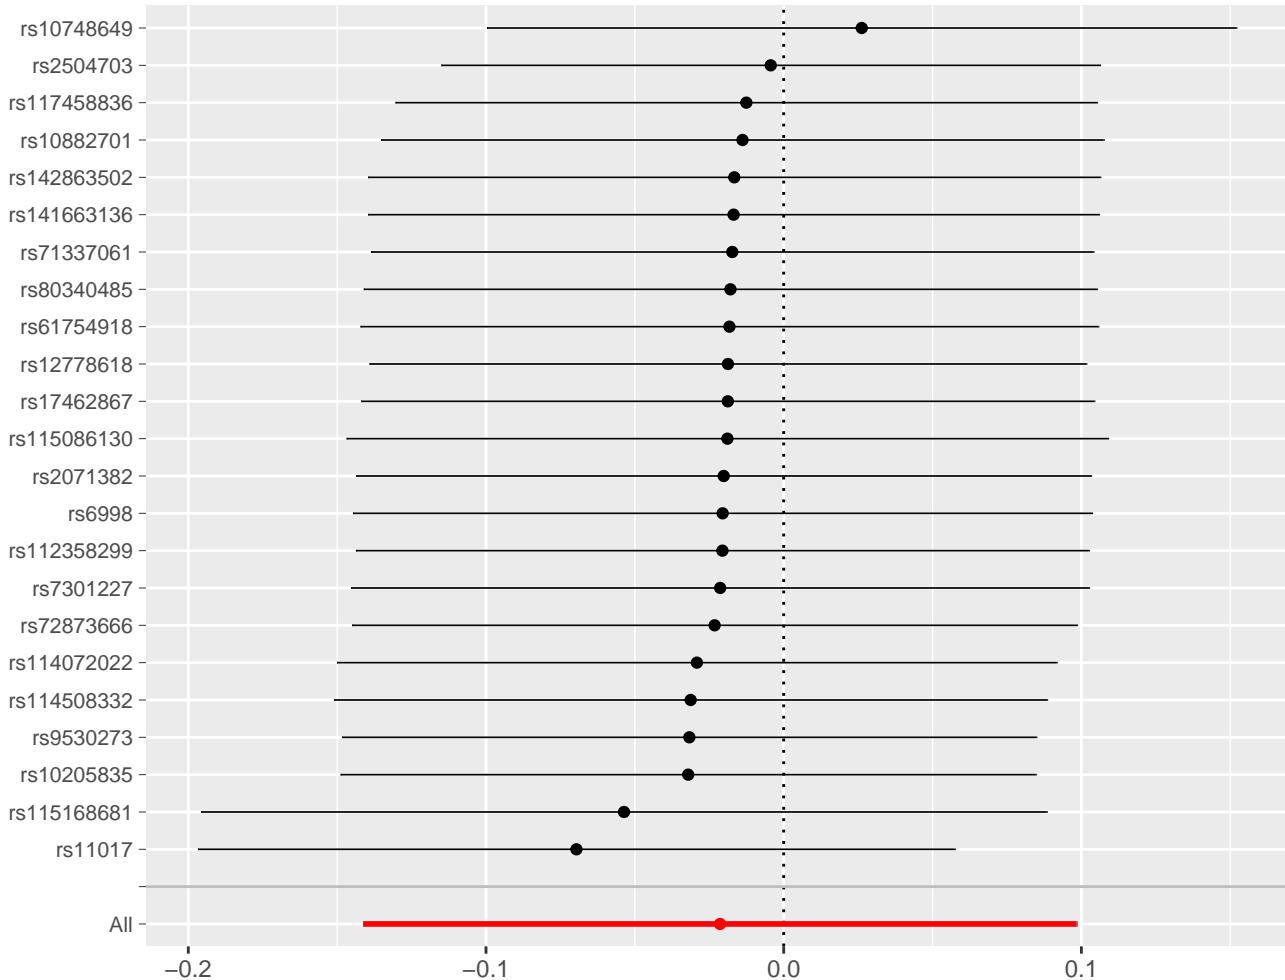

MR leave-one-out sensitivity analysis for  
'CD28 on CD39+ secreting Treg' on 'Juvenile arthritis'



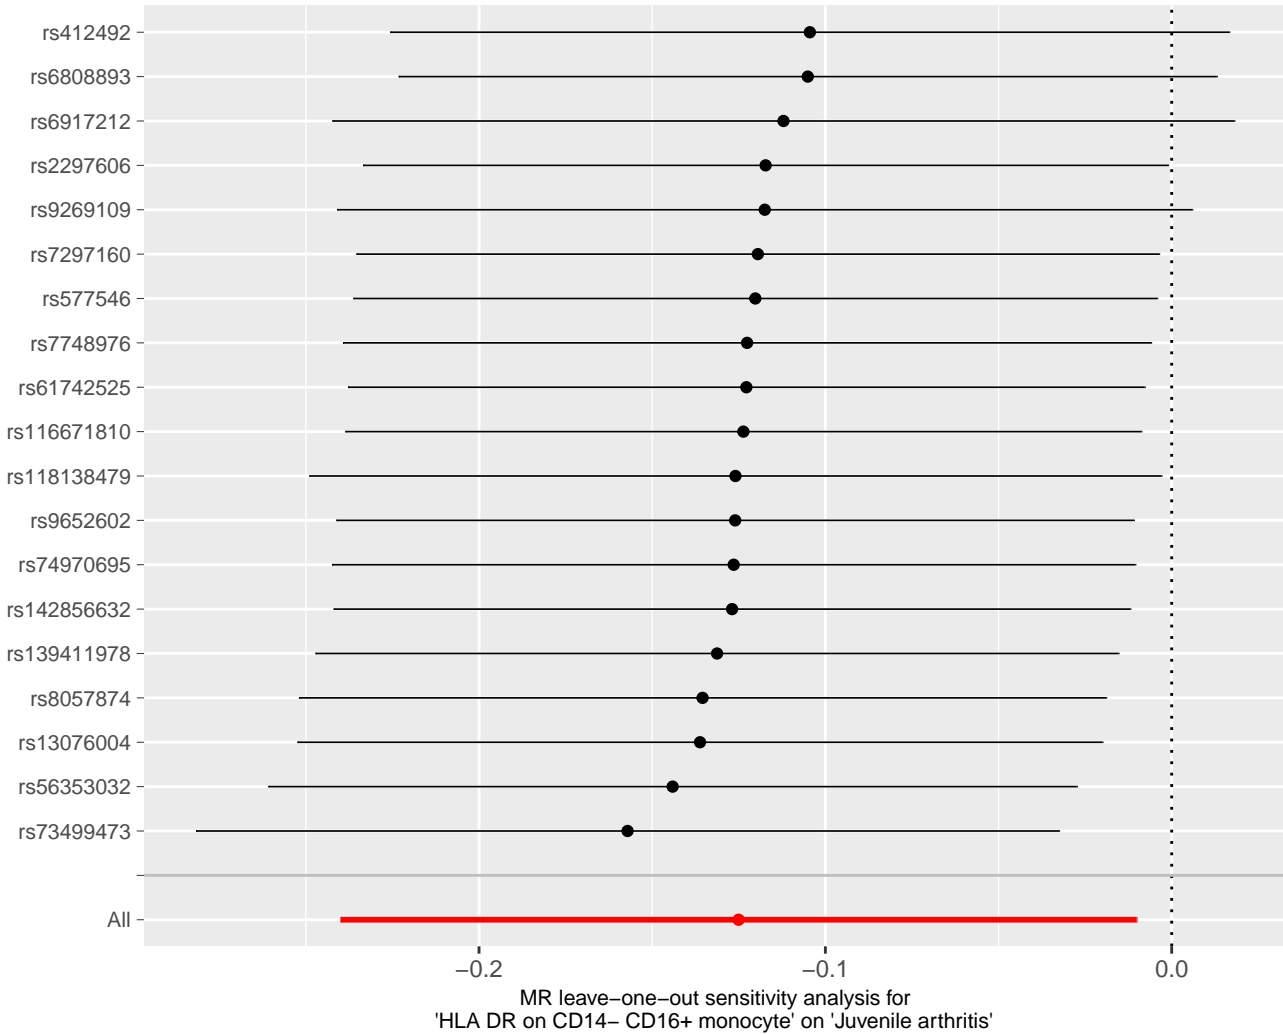

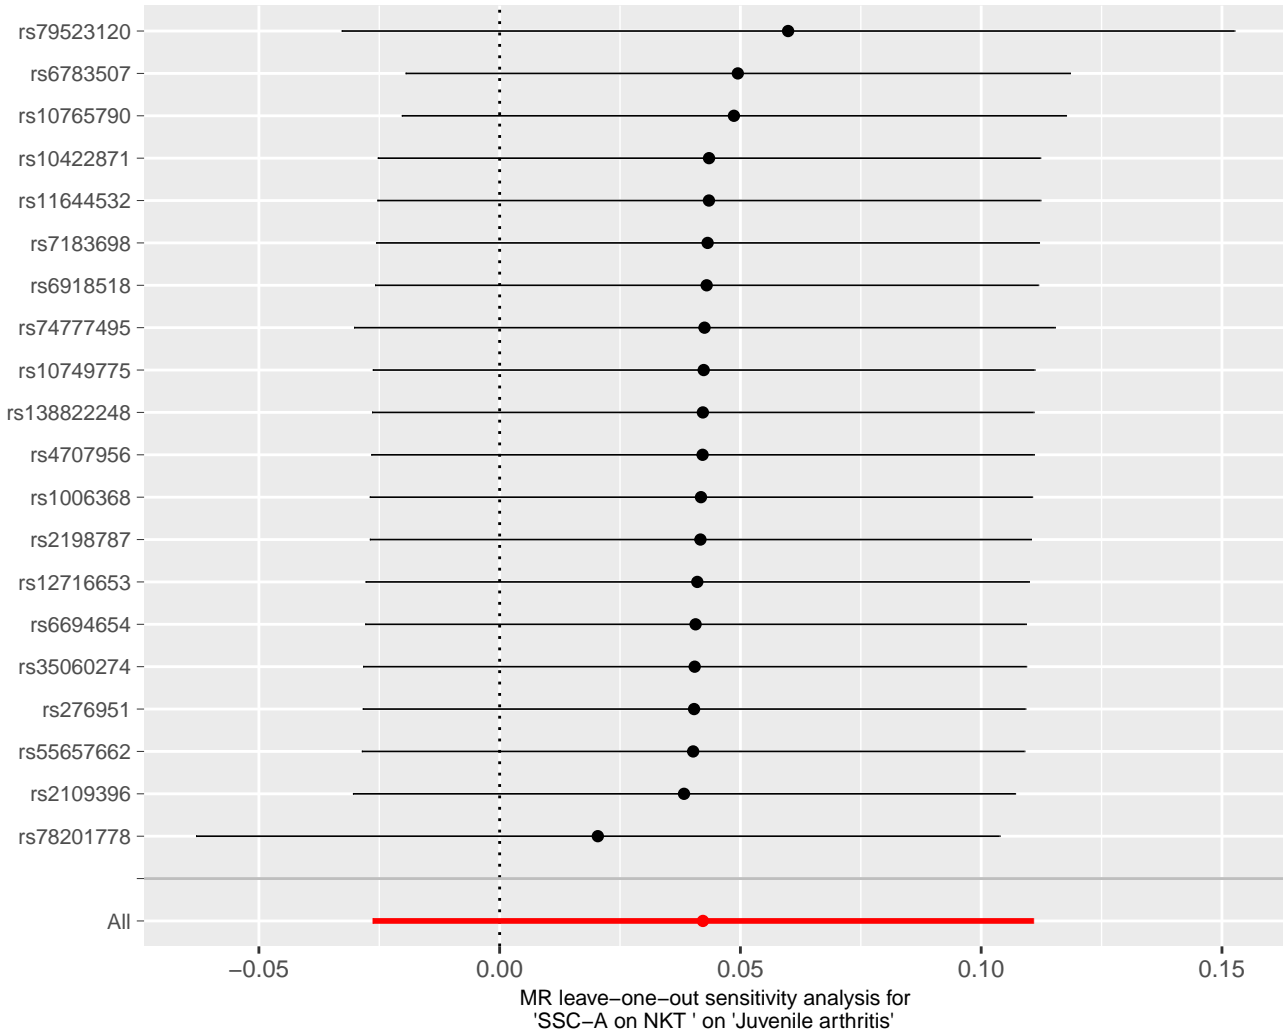

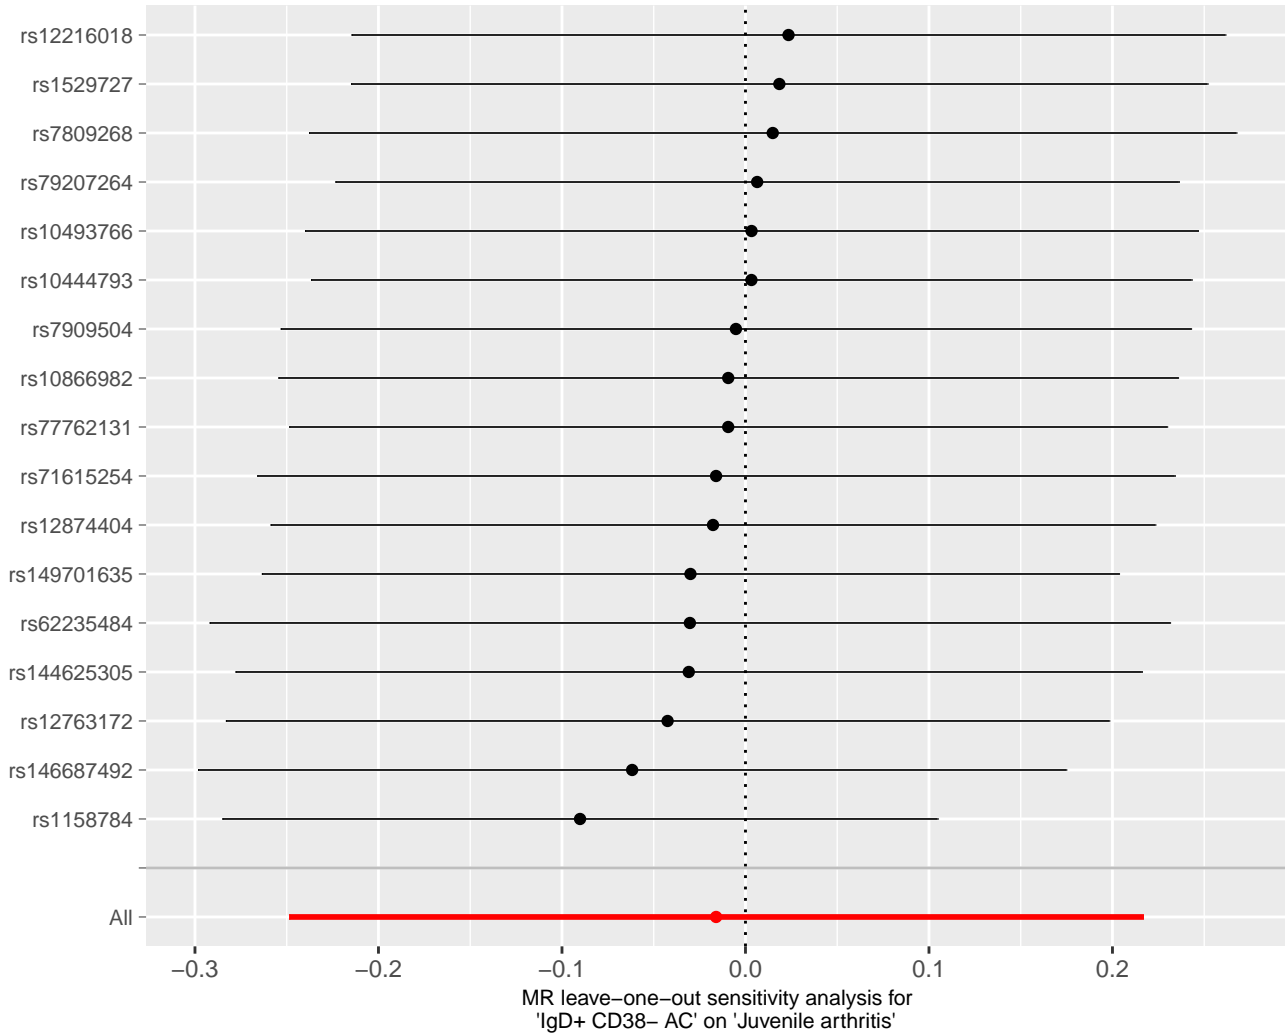

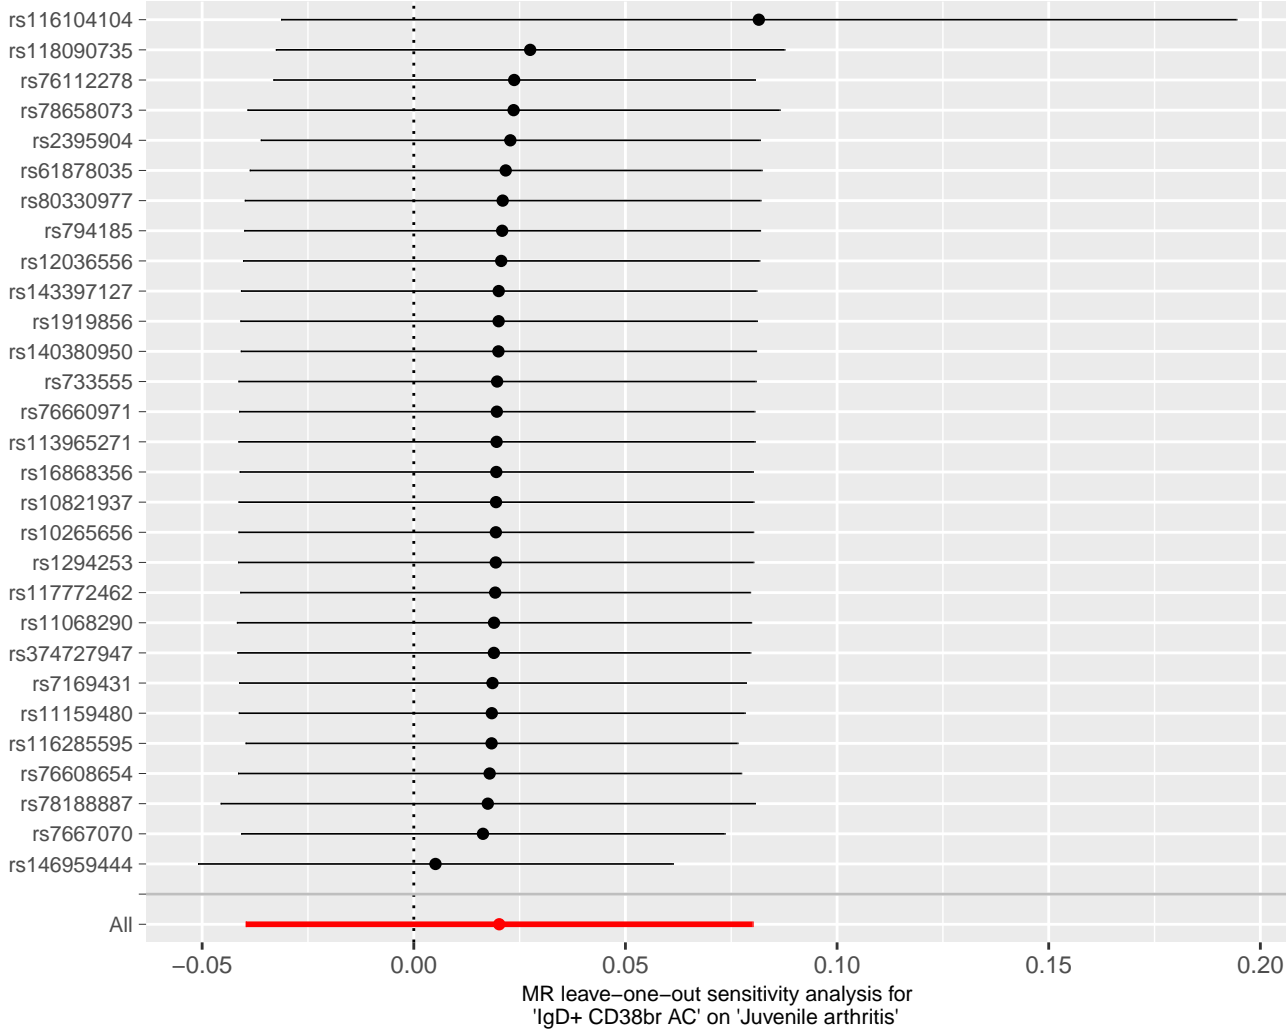

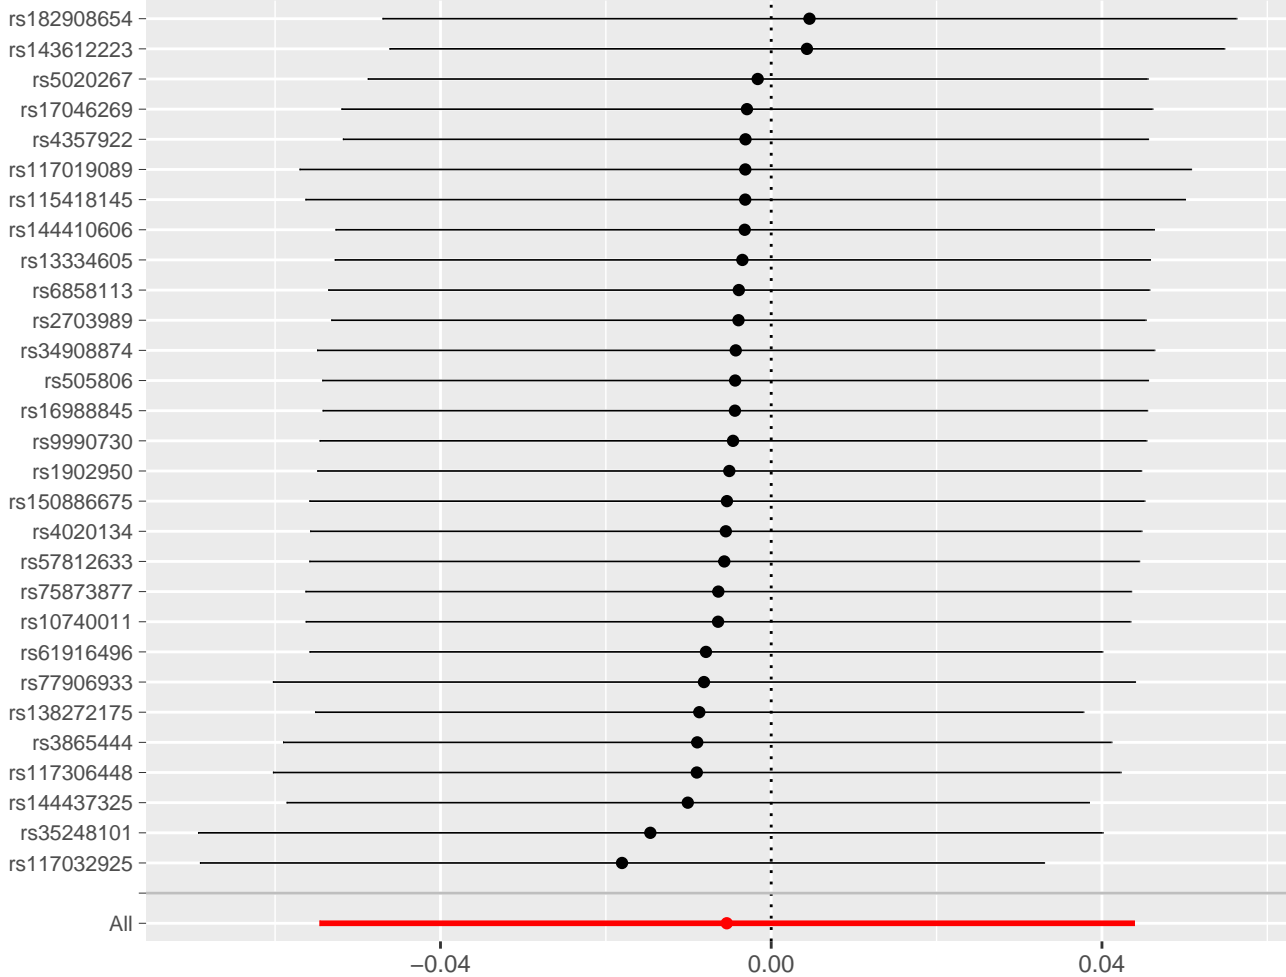

MR leave-one-out sensitivity analysis for 'CD33br HLA DR+ CD14- AC' on 'Juvenile arthritis'

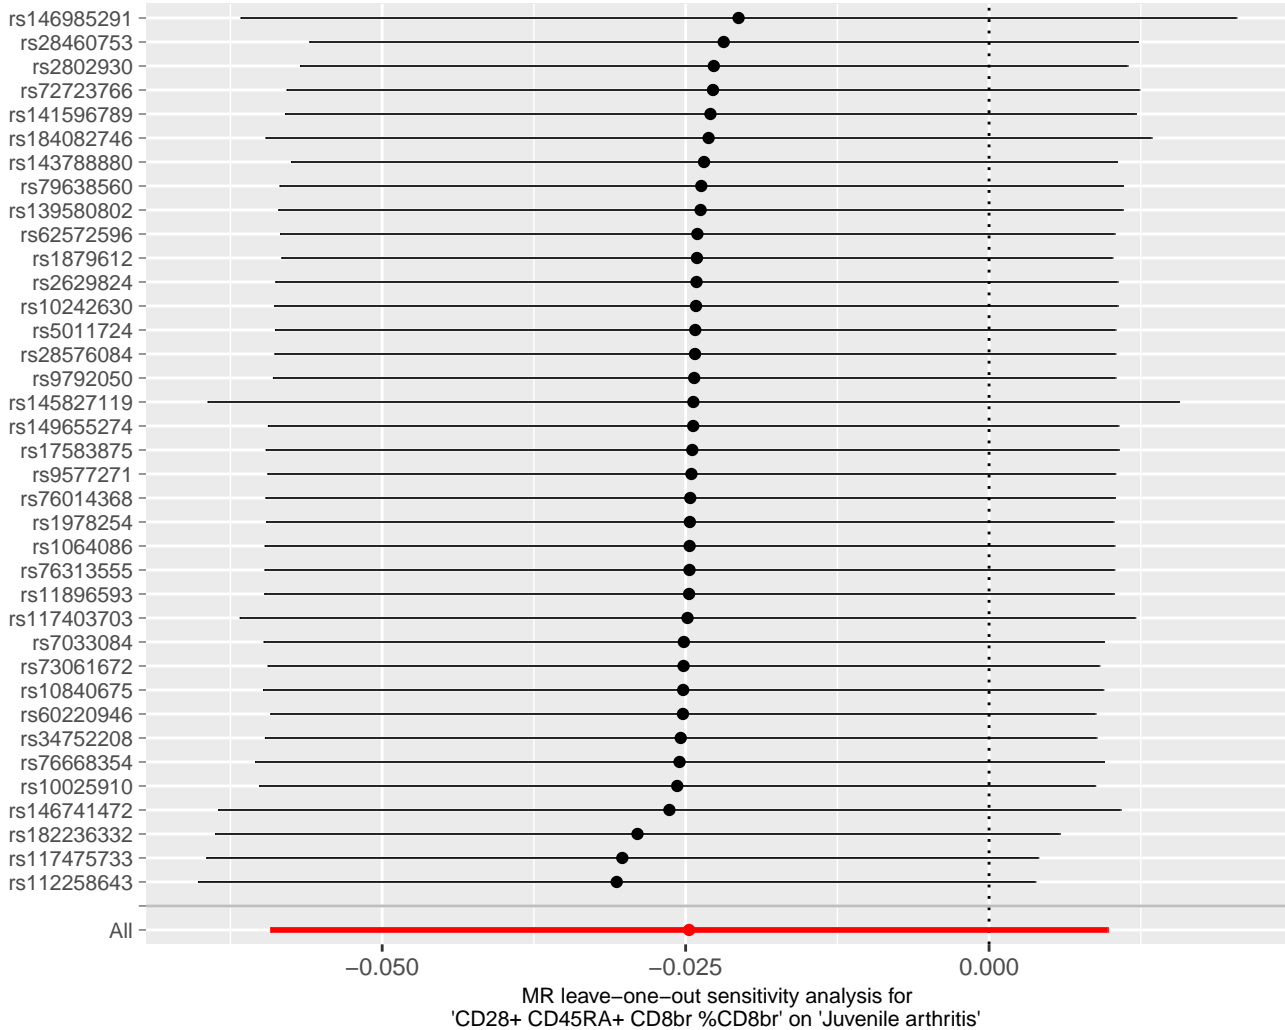

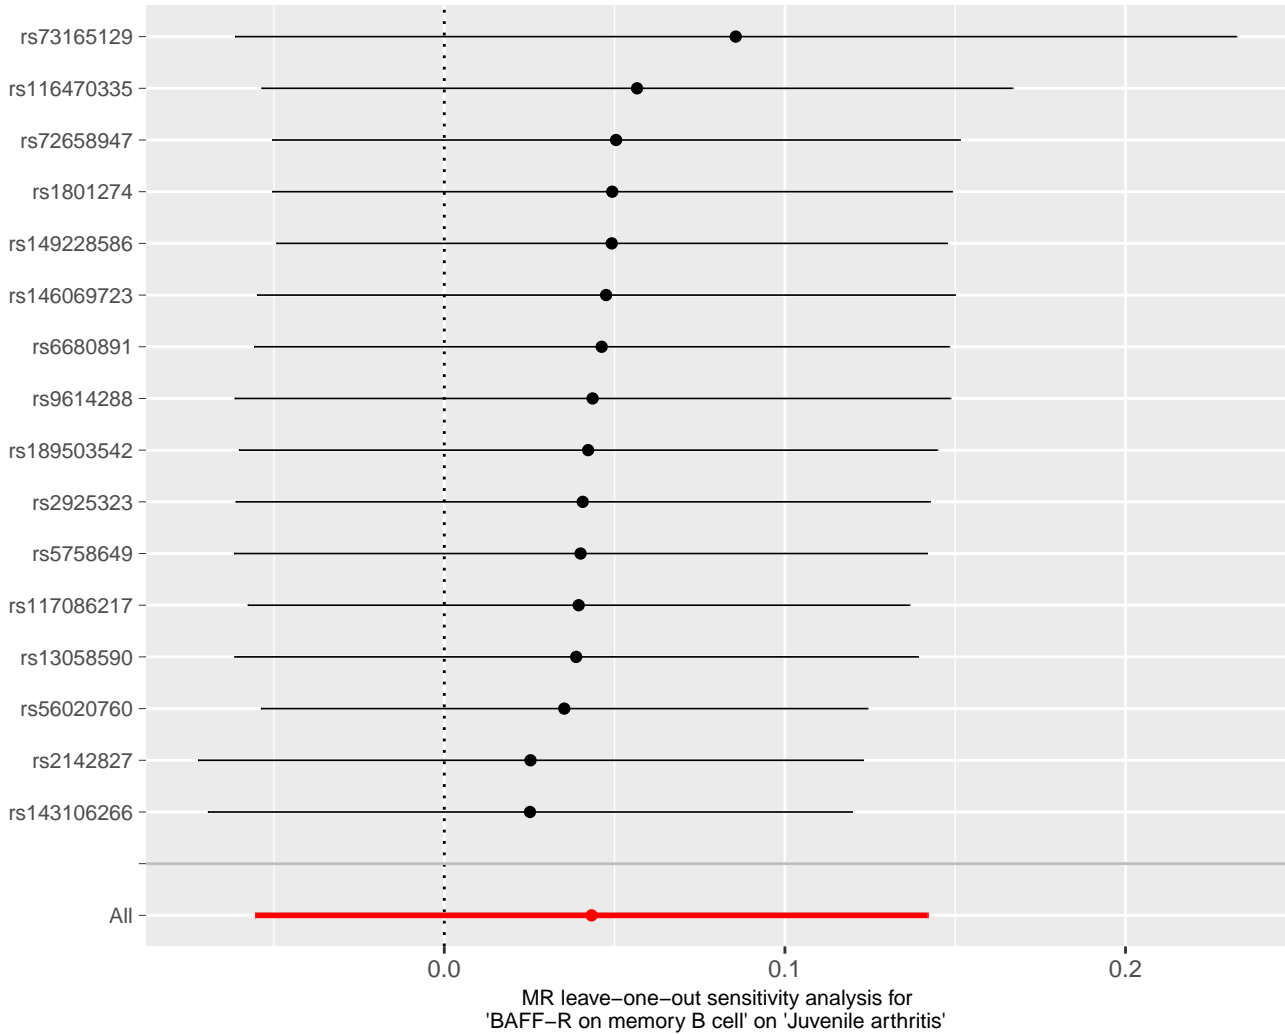

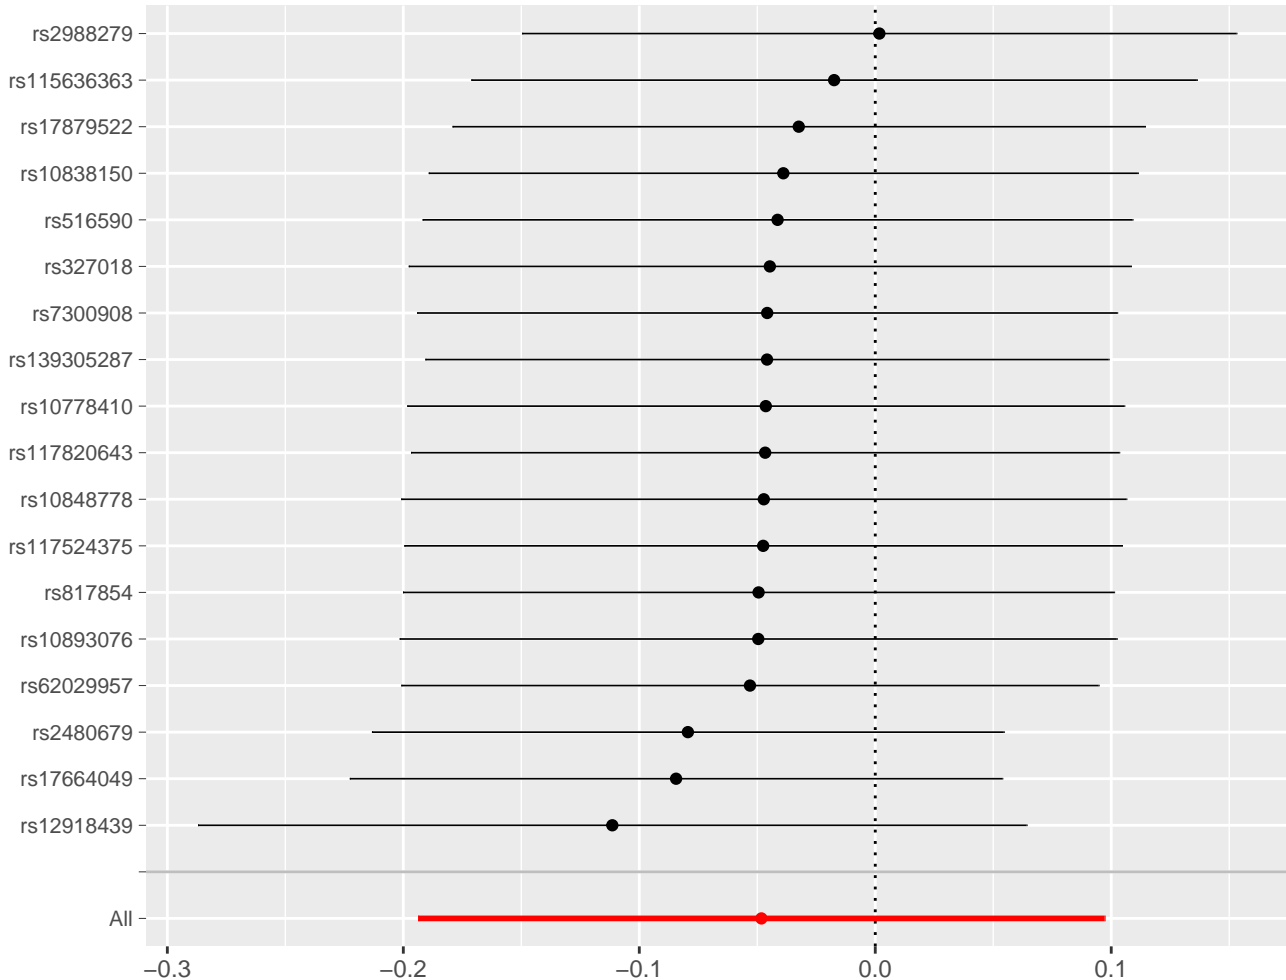

MR leave-one-out sensitivity analysis for 'CD3 on EM CD8br ' on 'Juvenile arthritis'



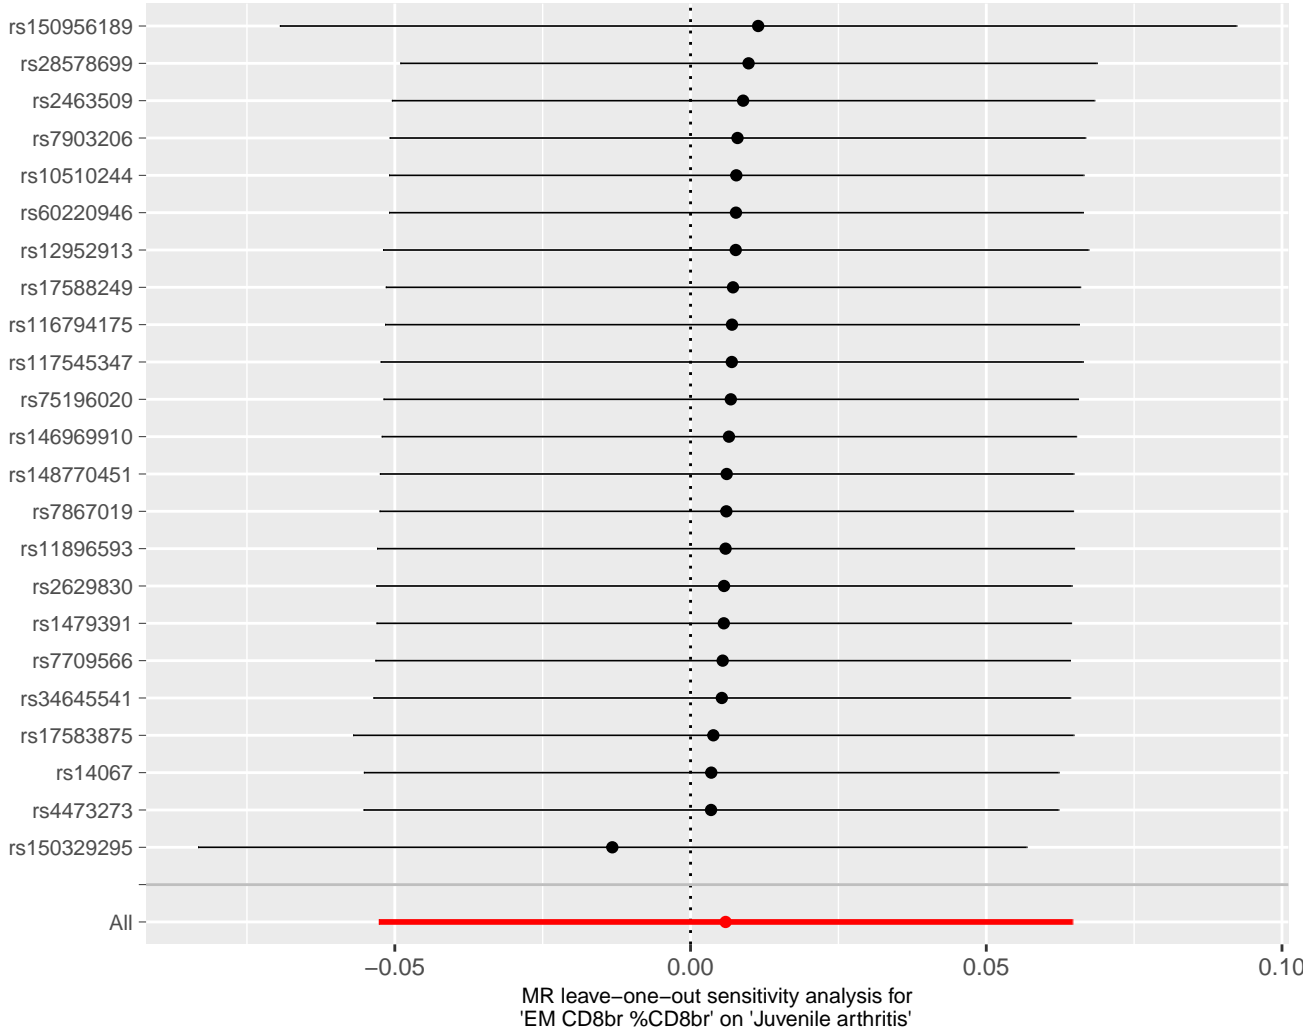

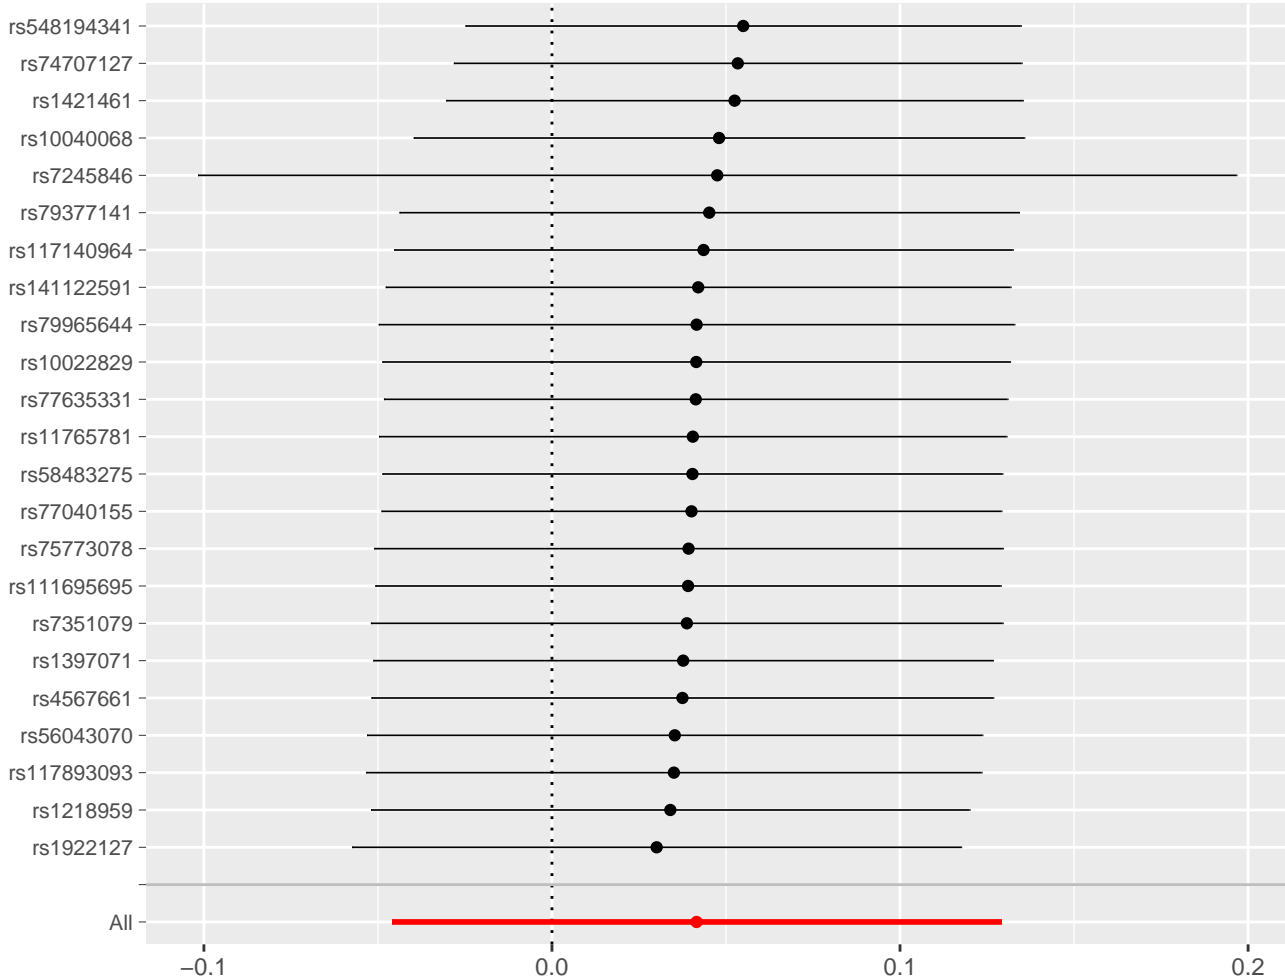

MR leave-one-out sensitivity analysis for 'CD33 on Im MDSC ' on 'Juvenile arthritis'

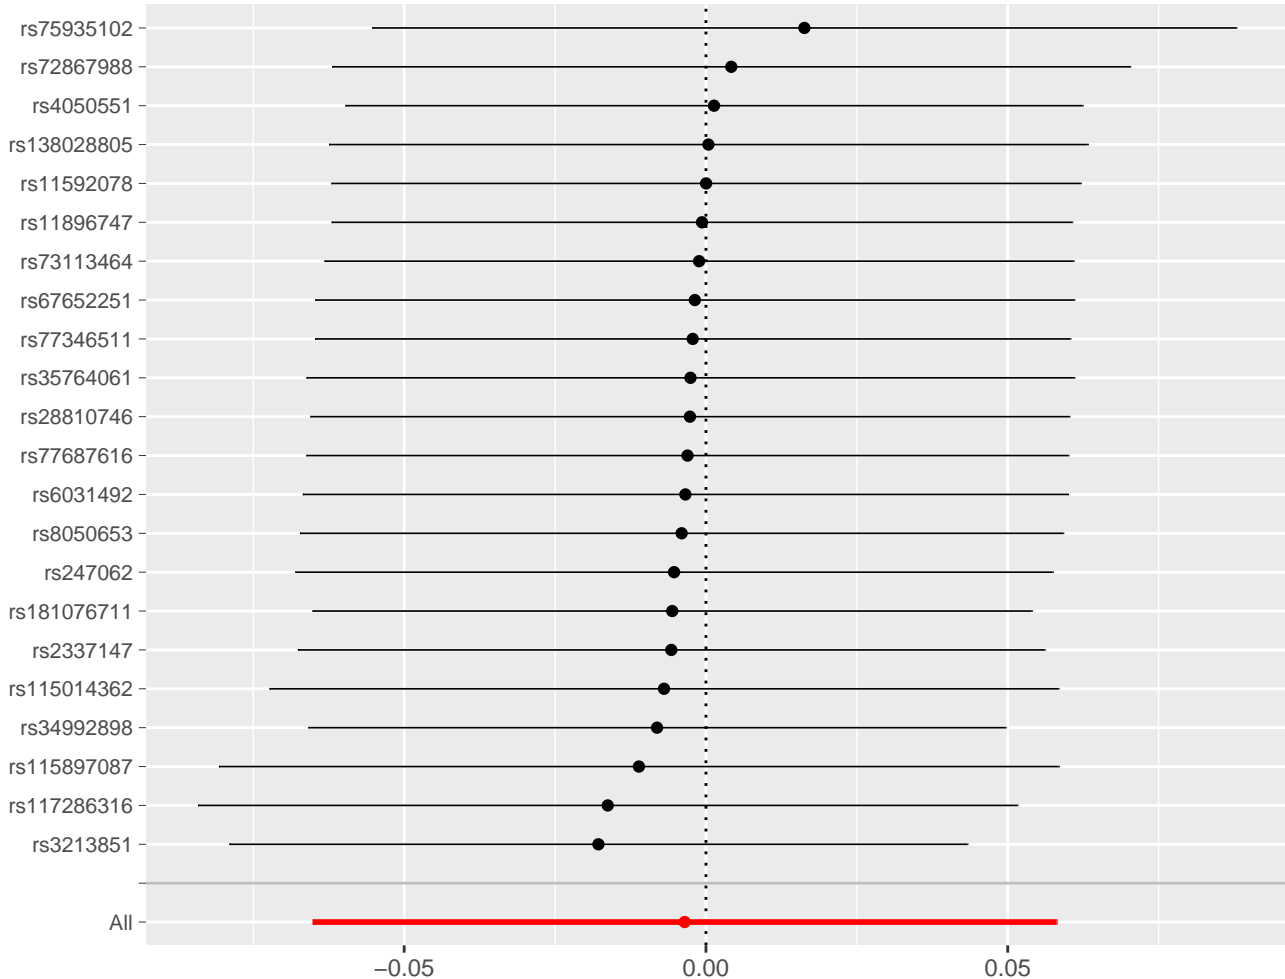

MR leave-one-out sensitivity analysis for 'CD39 on monocyte' on 'Juvenile arthritis'

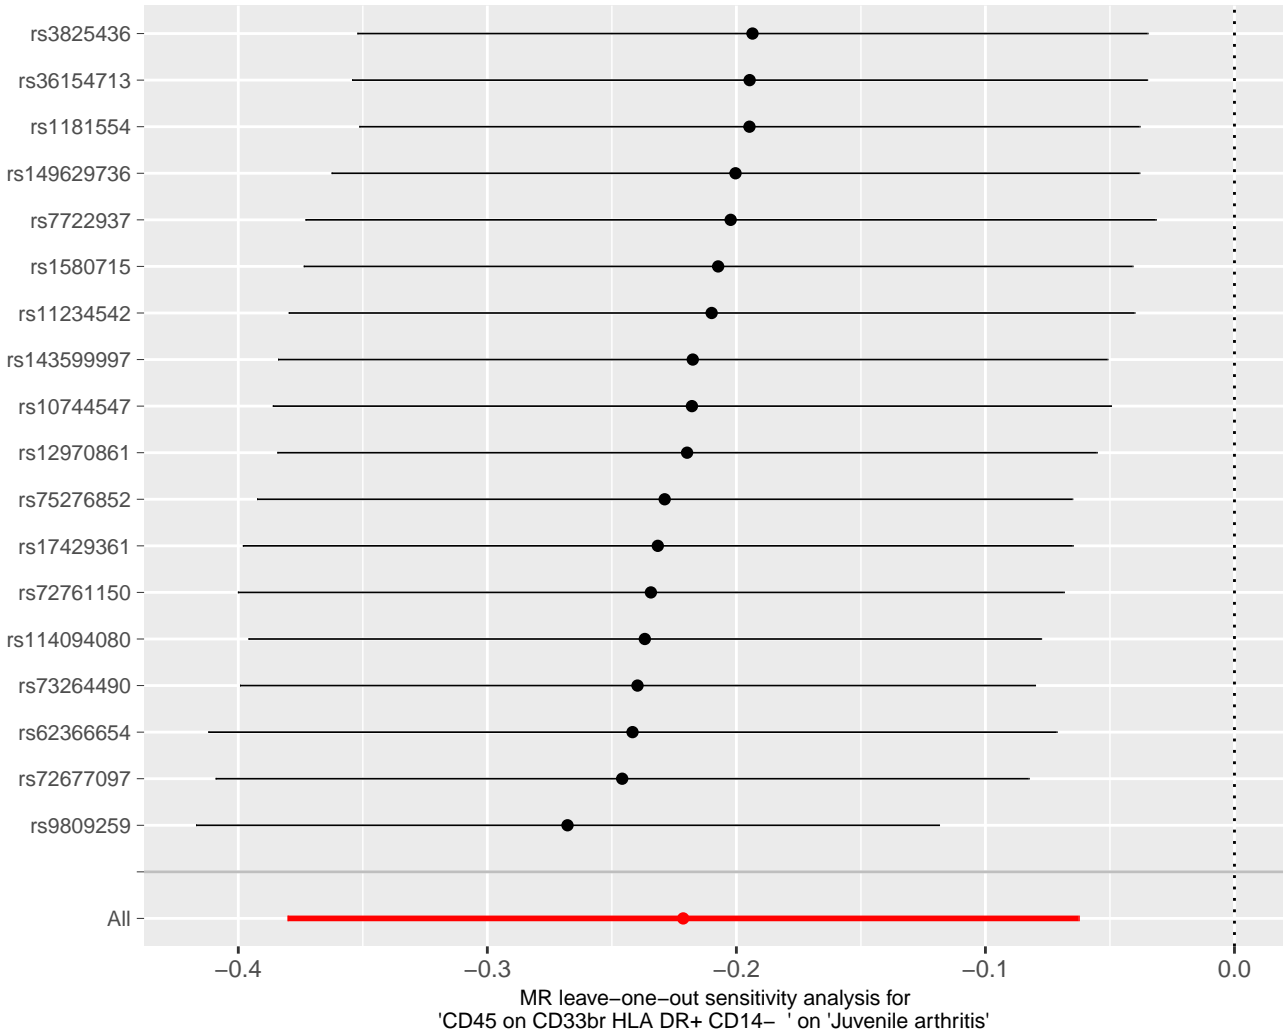

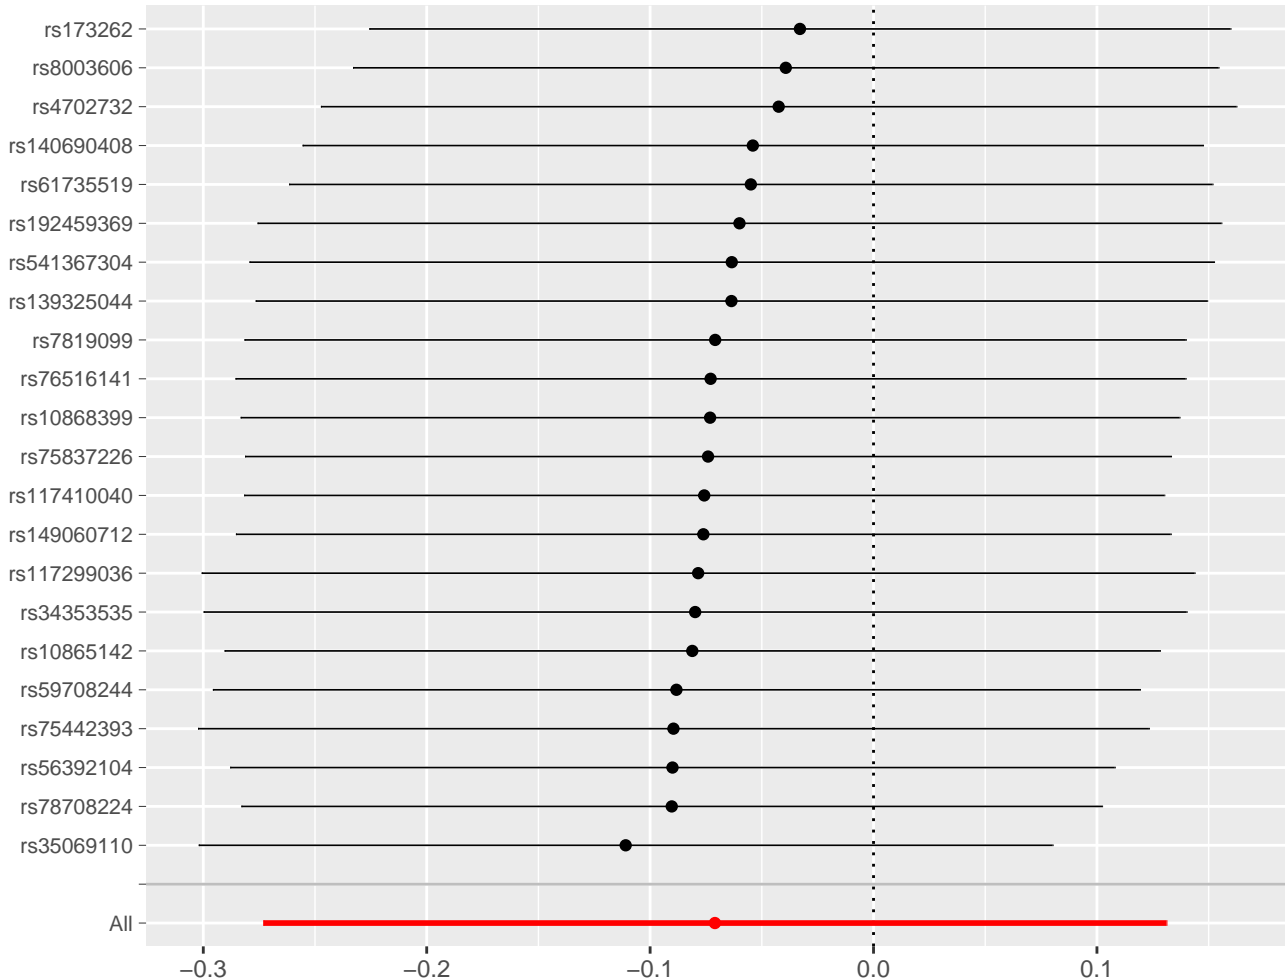

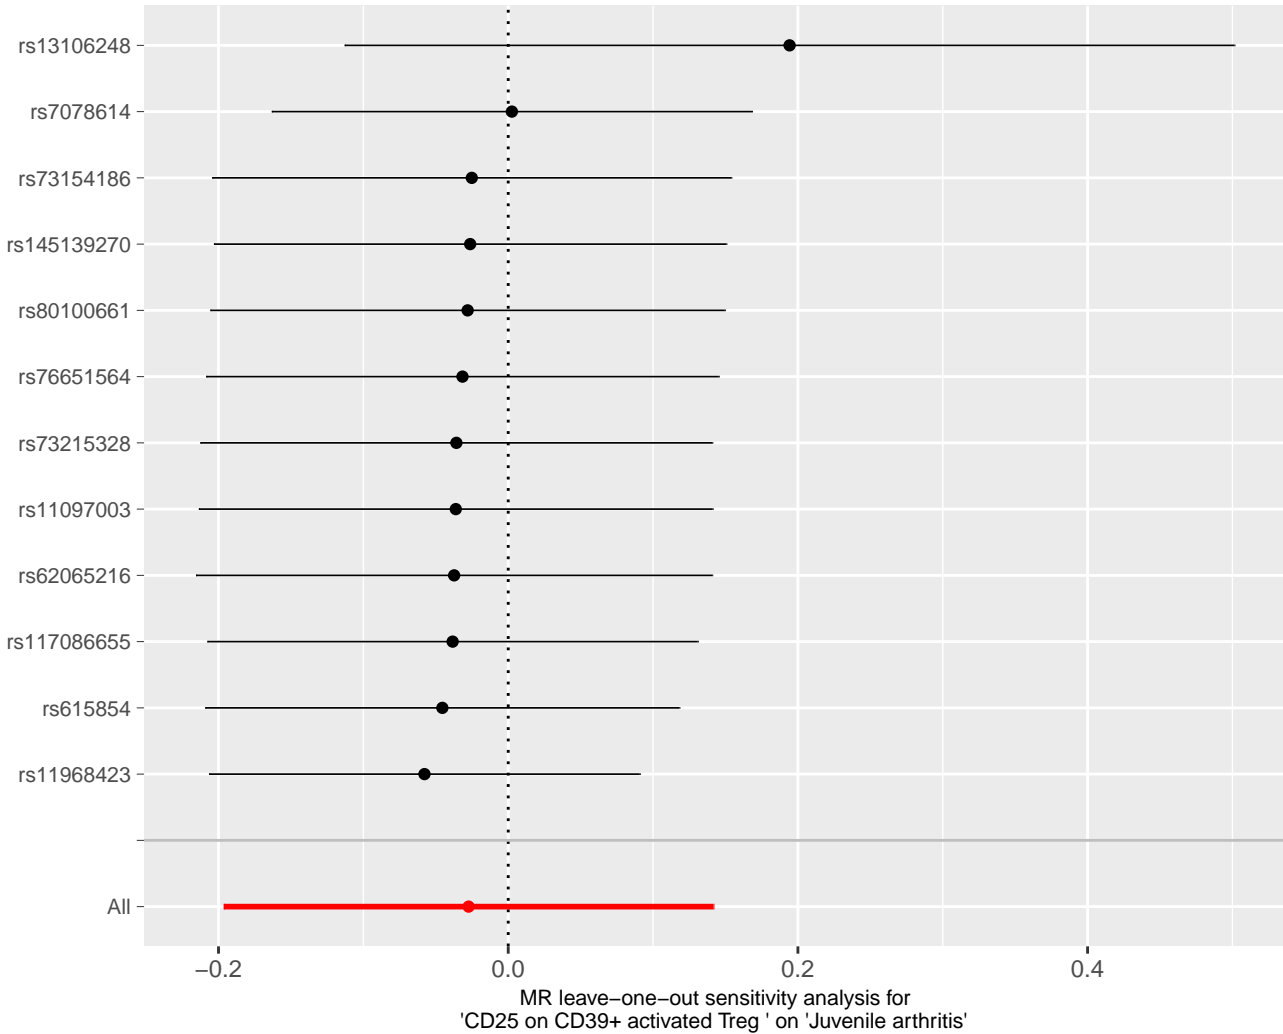

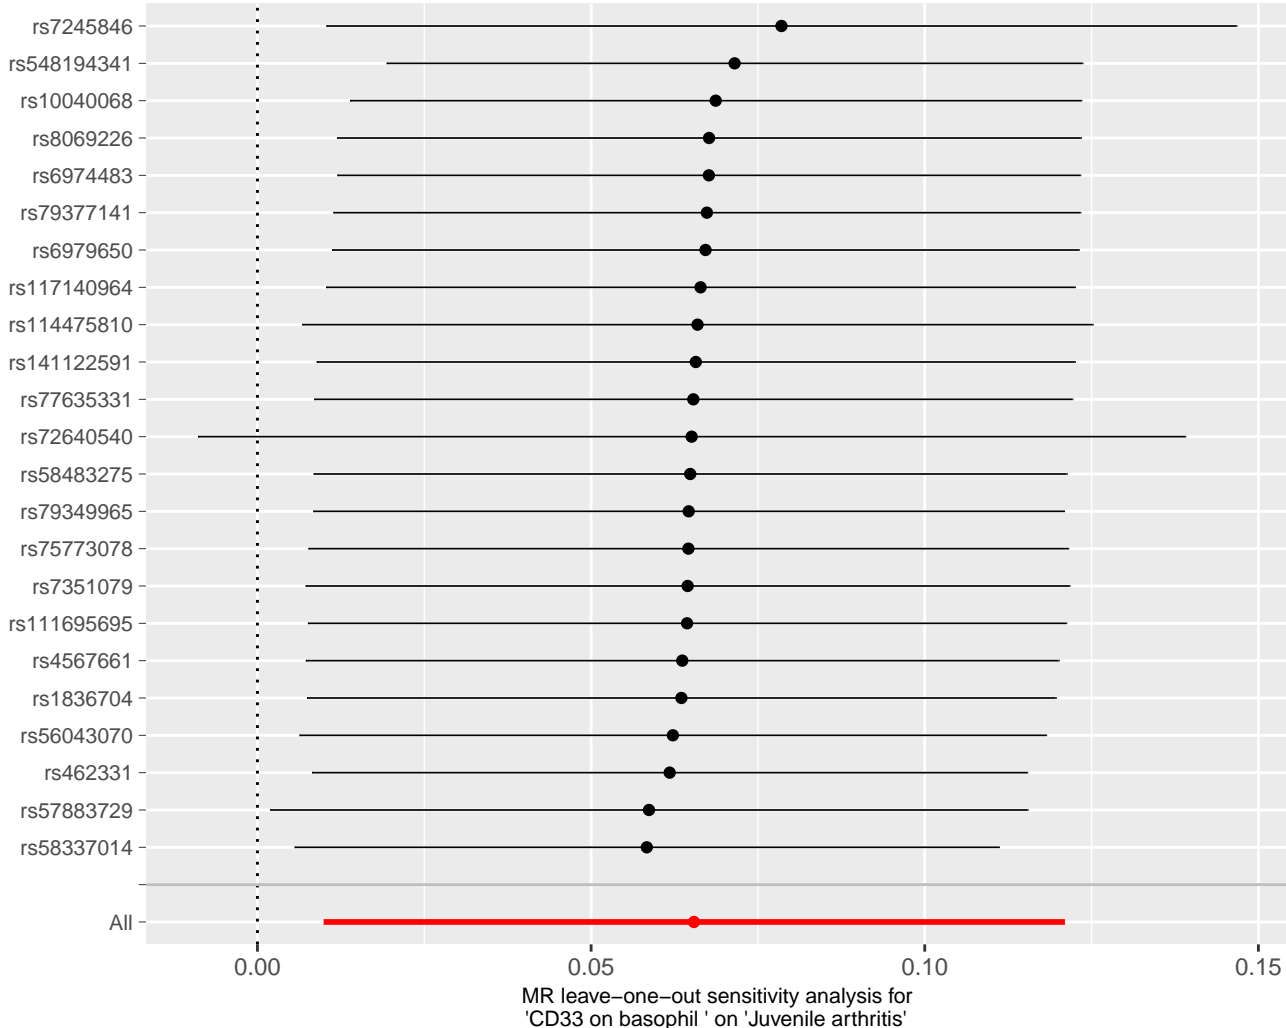

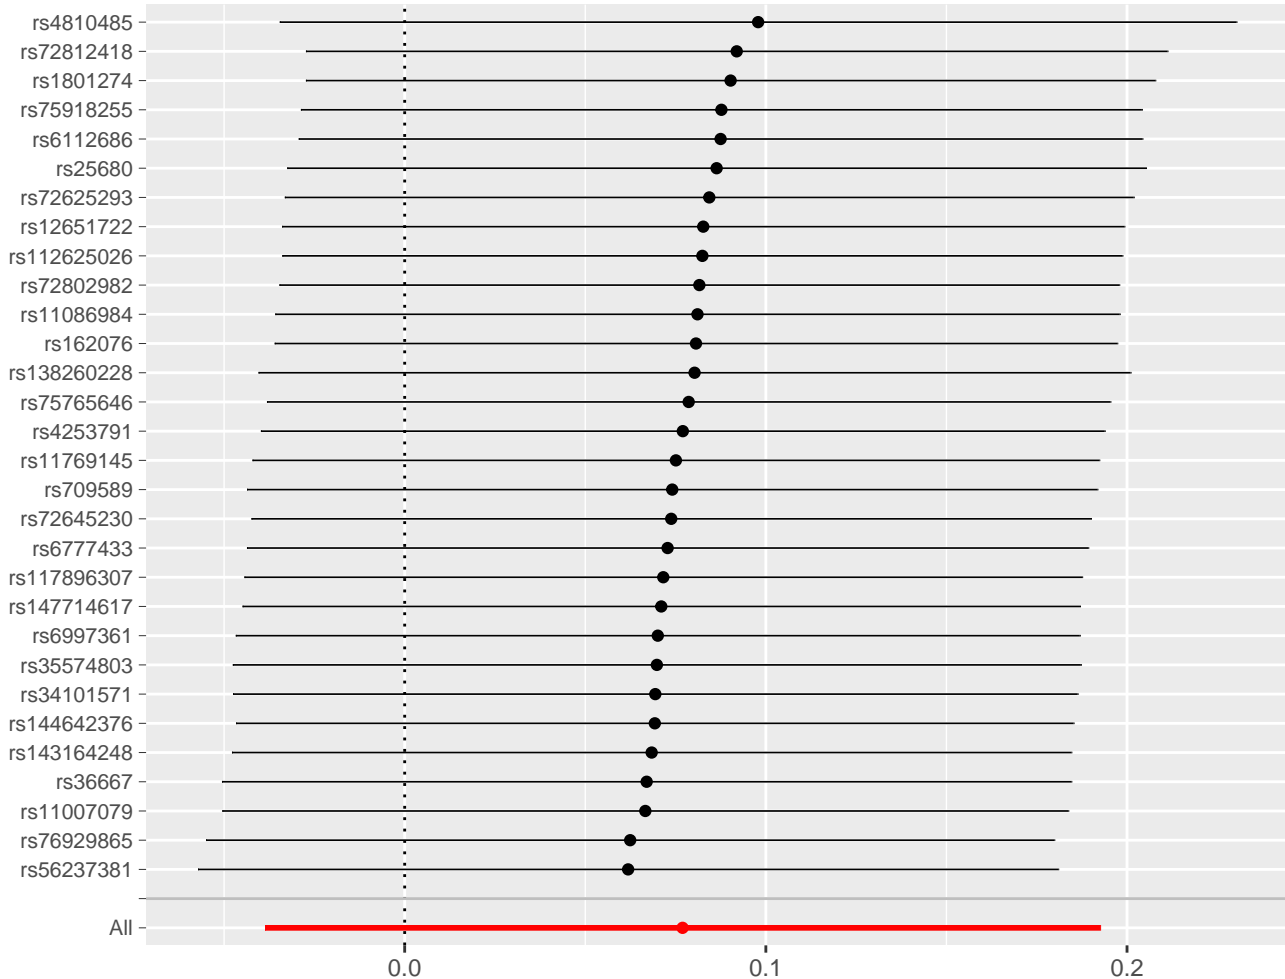

MR leave-one-out sensitivity analysis for 'CD27 on unsw mem' on 'Juvenile arthritis'



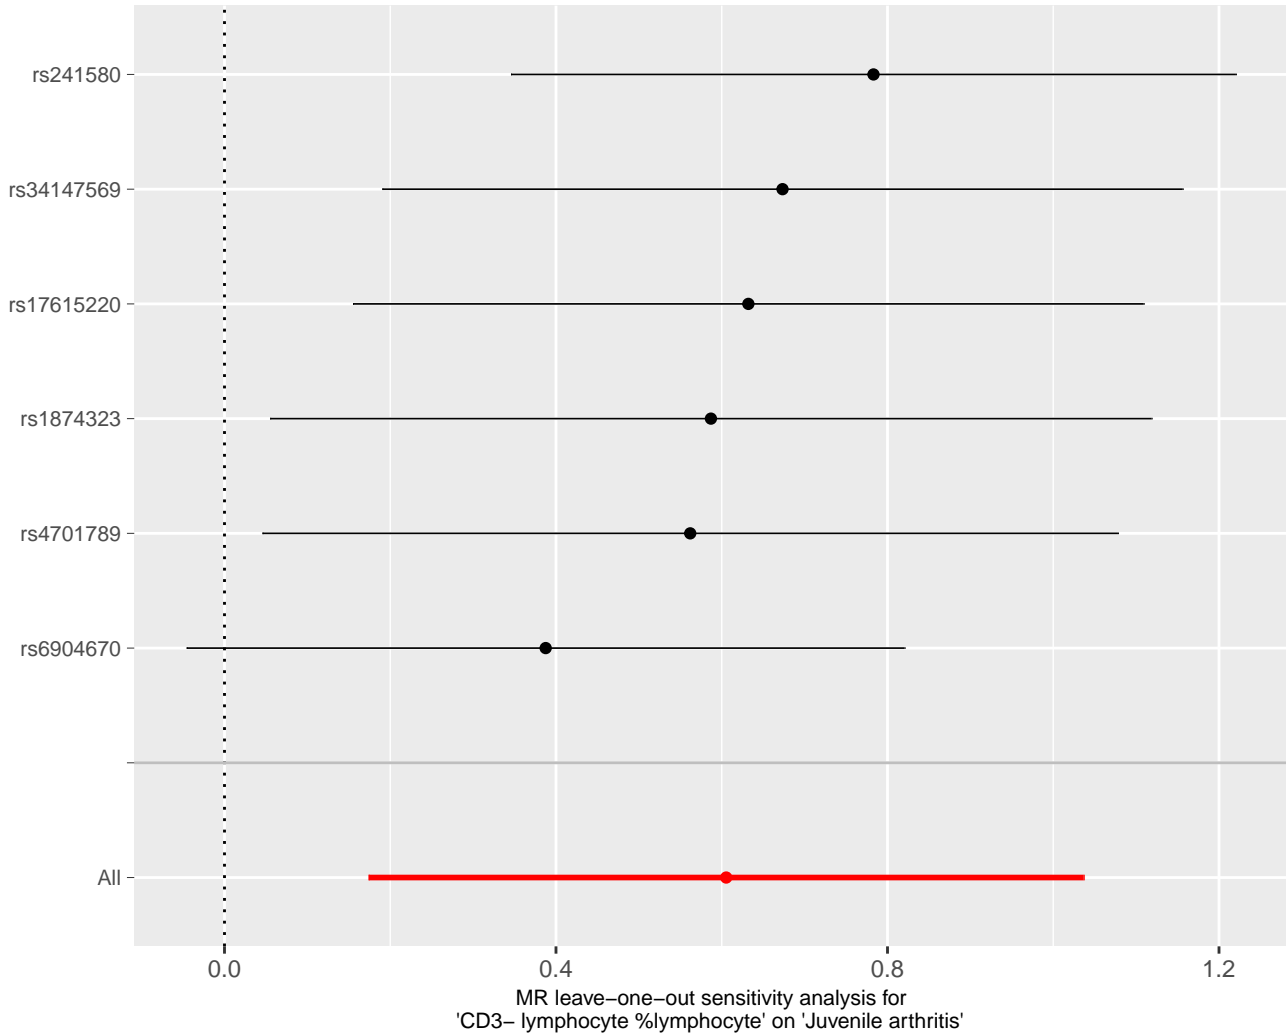

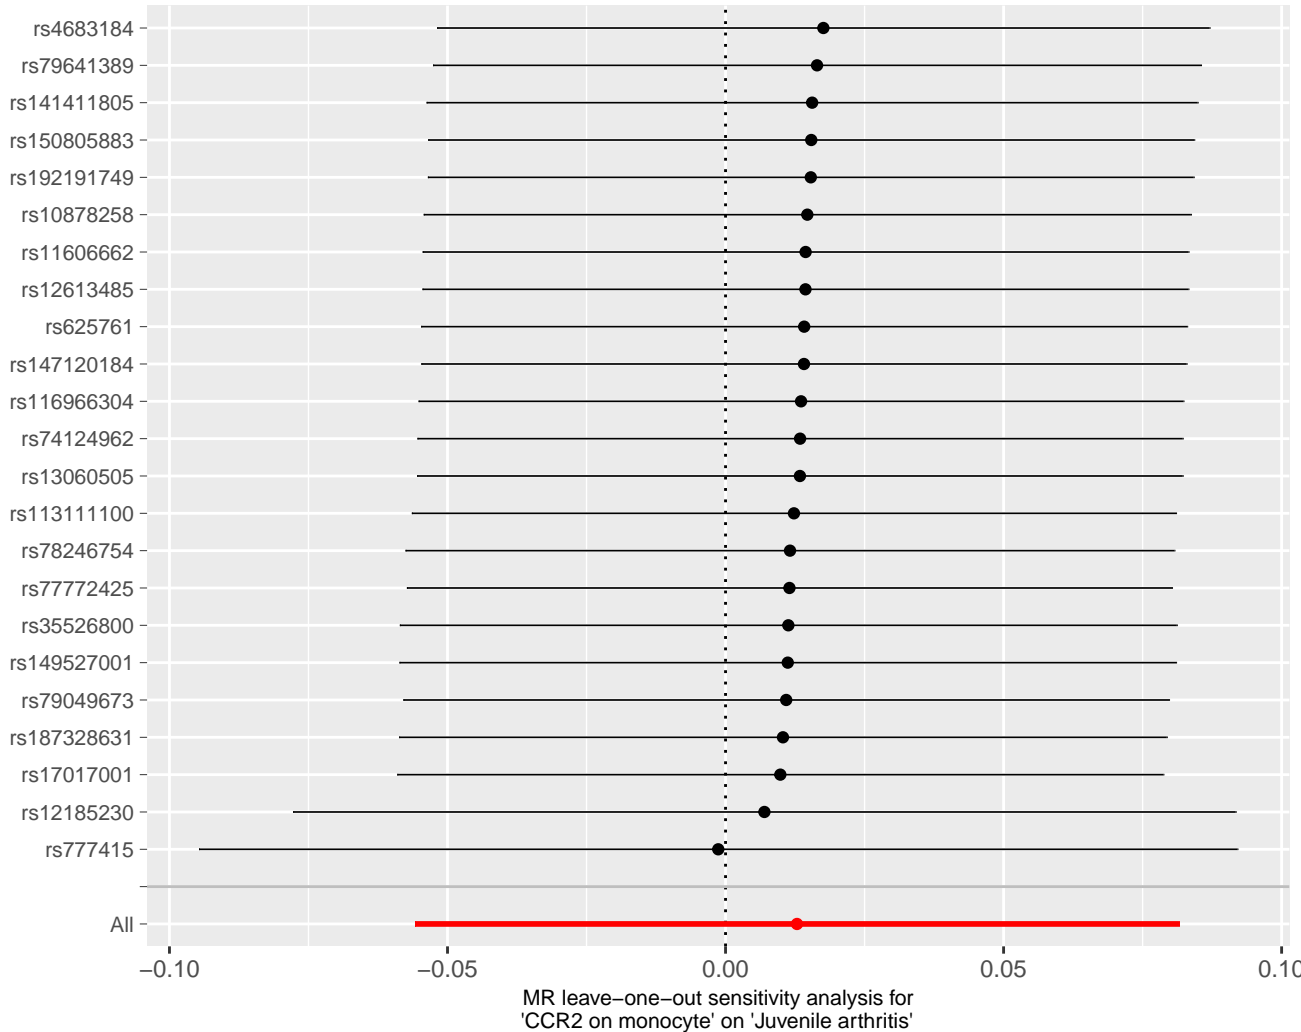

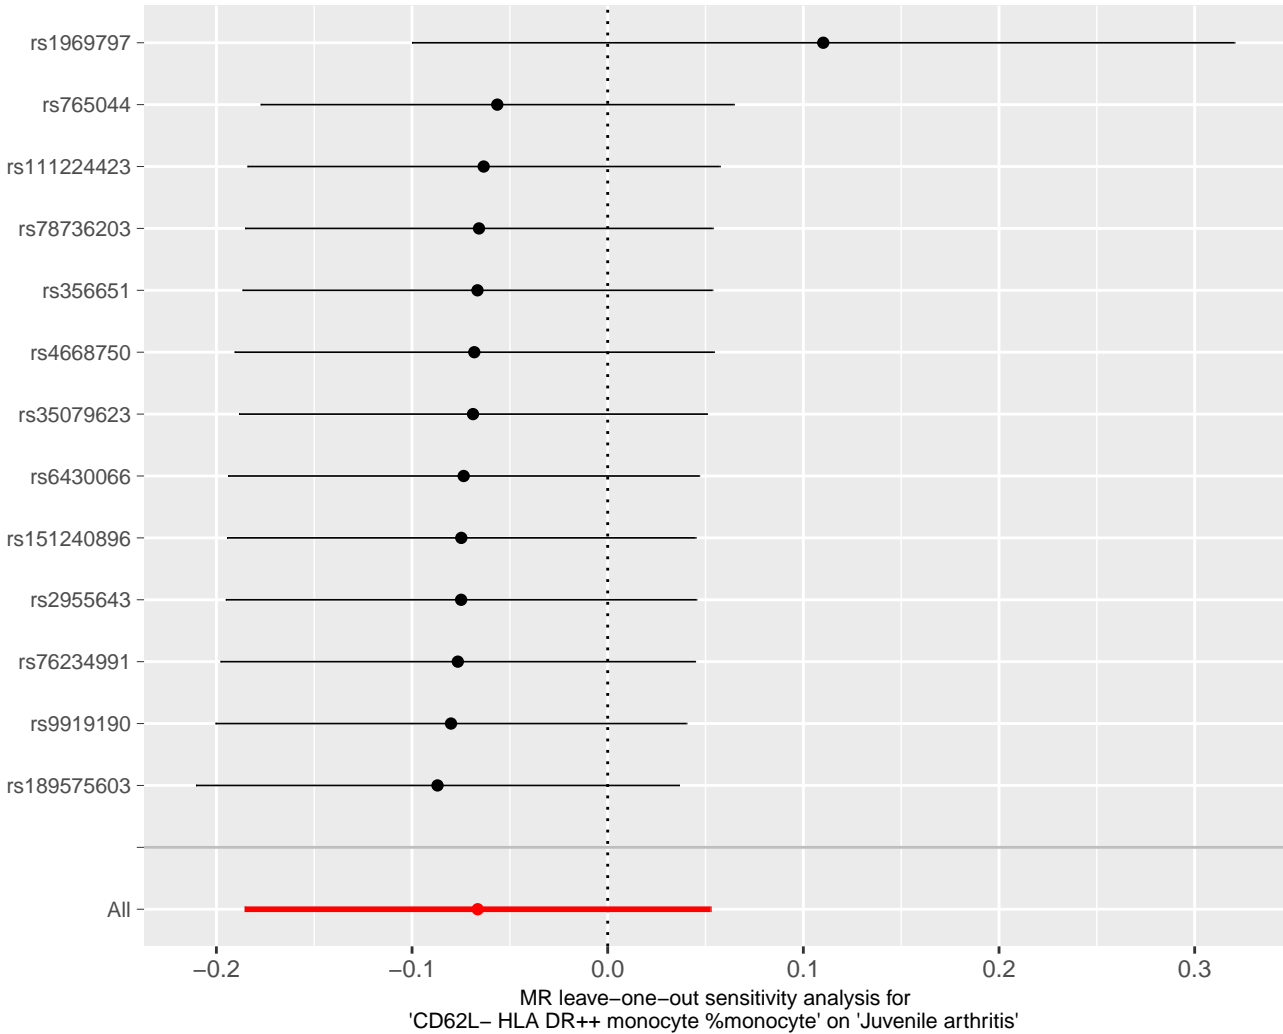

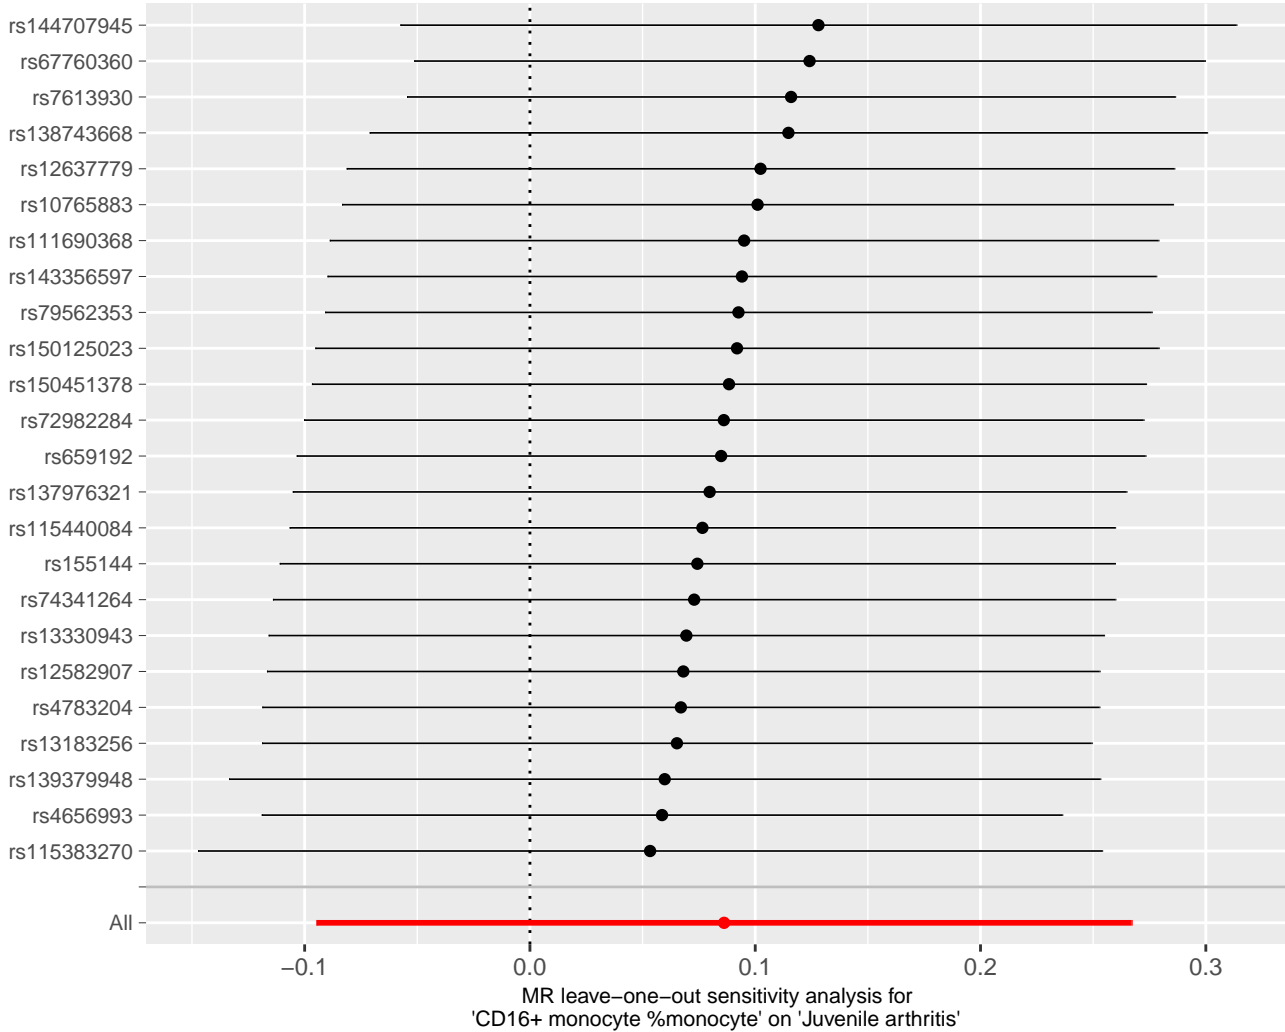

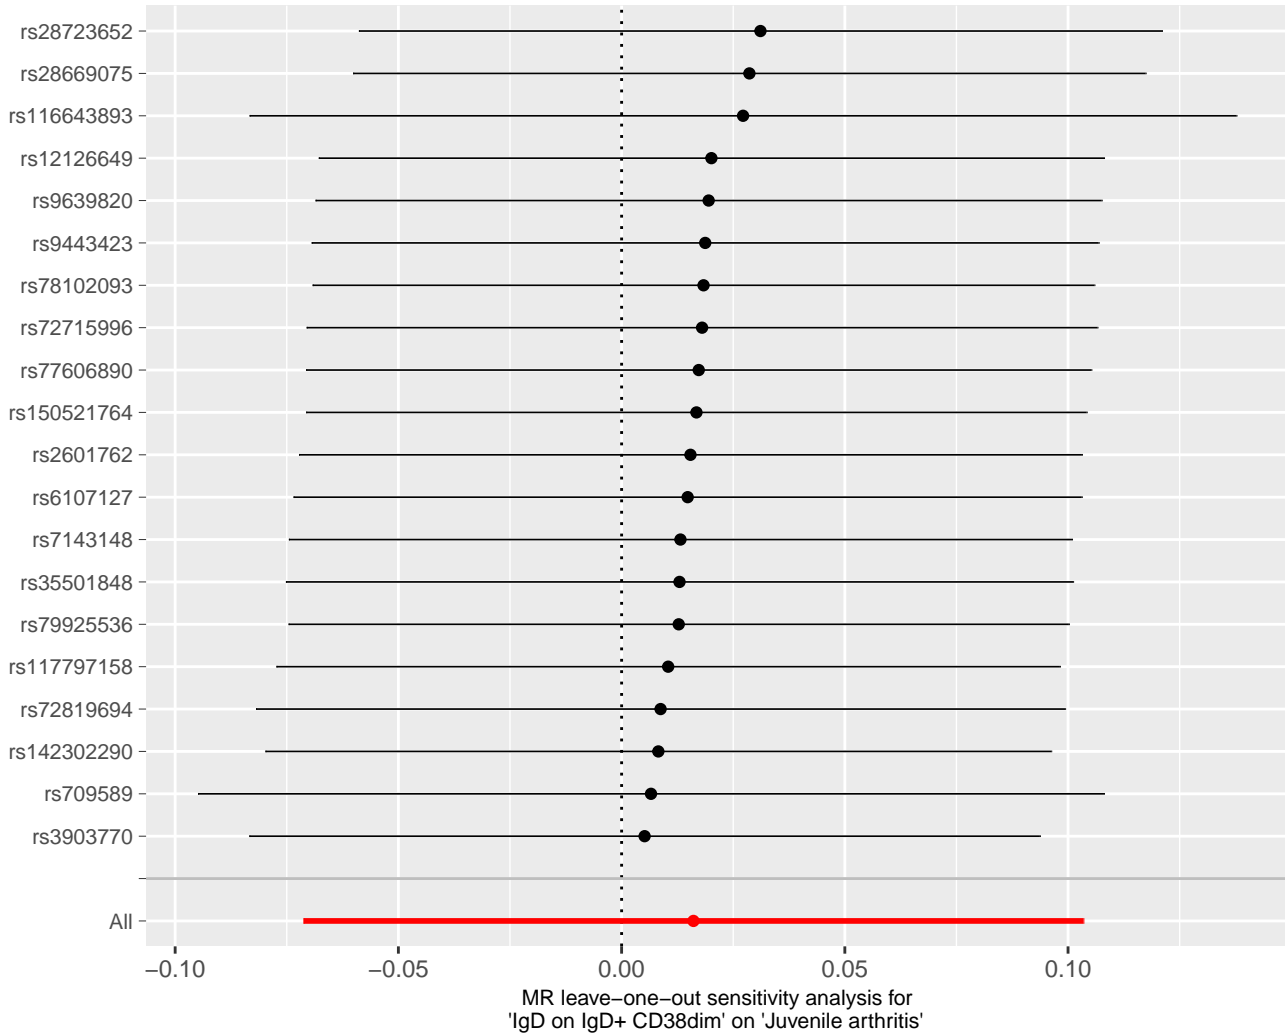

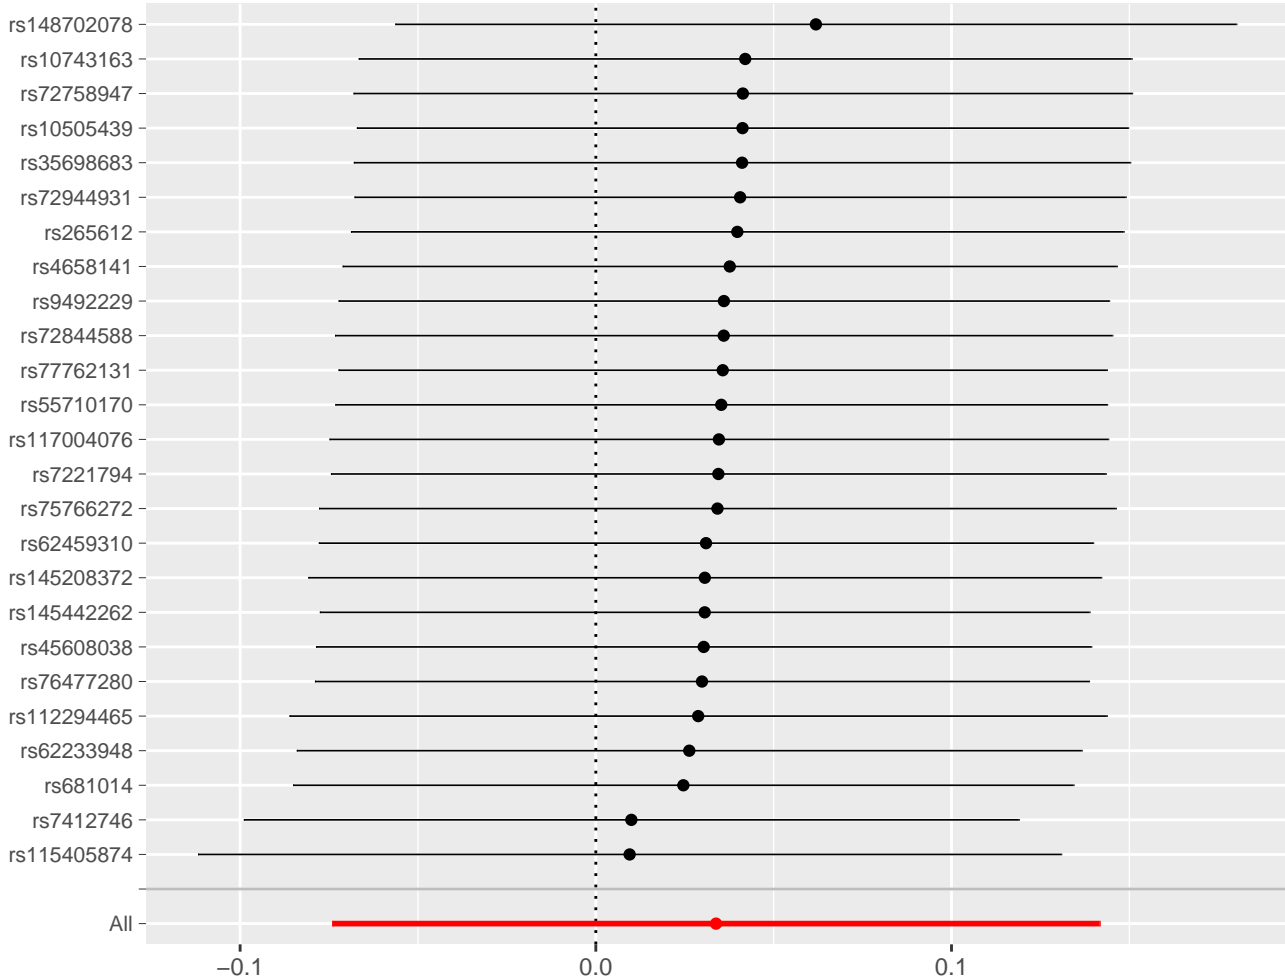

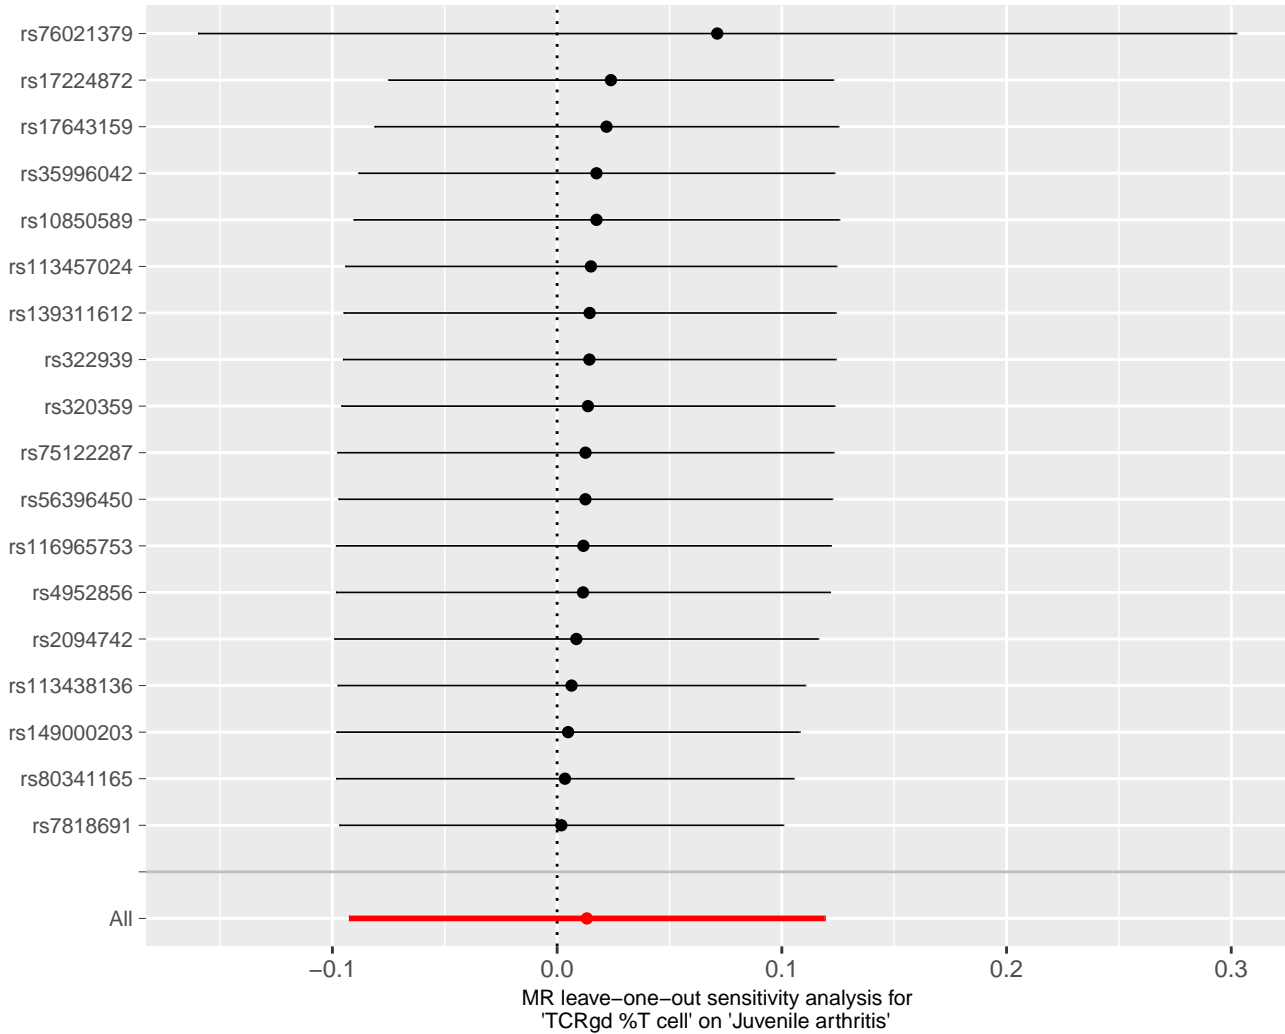

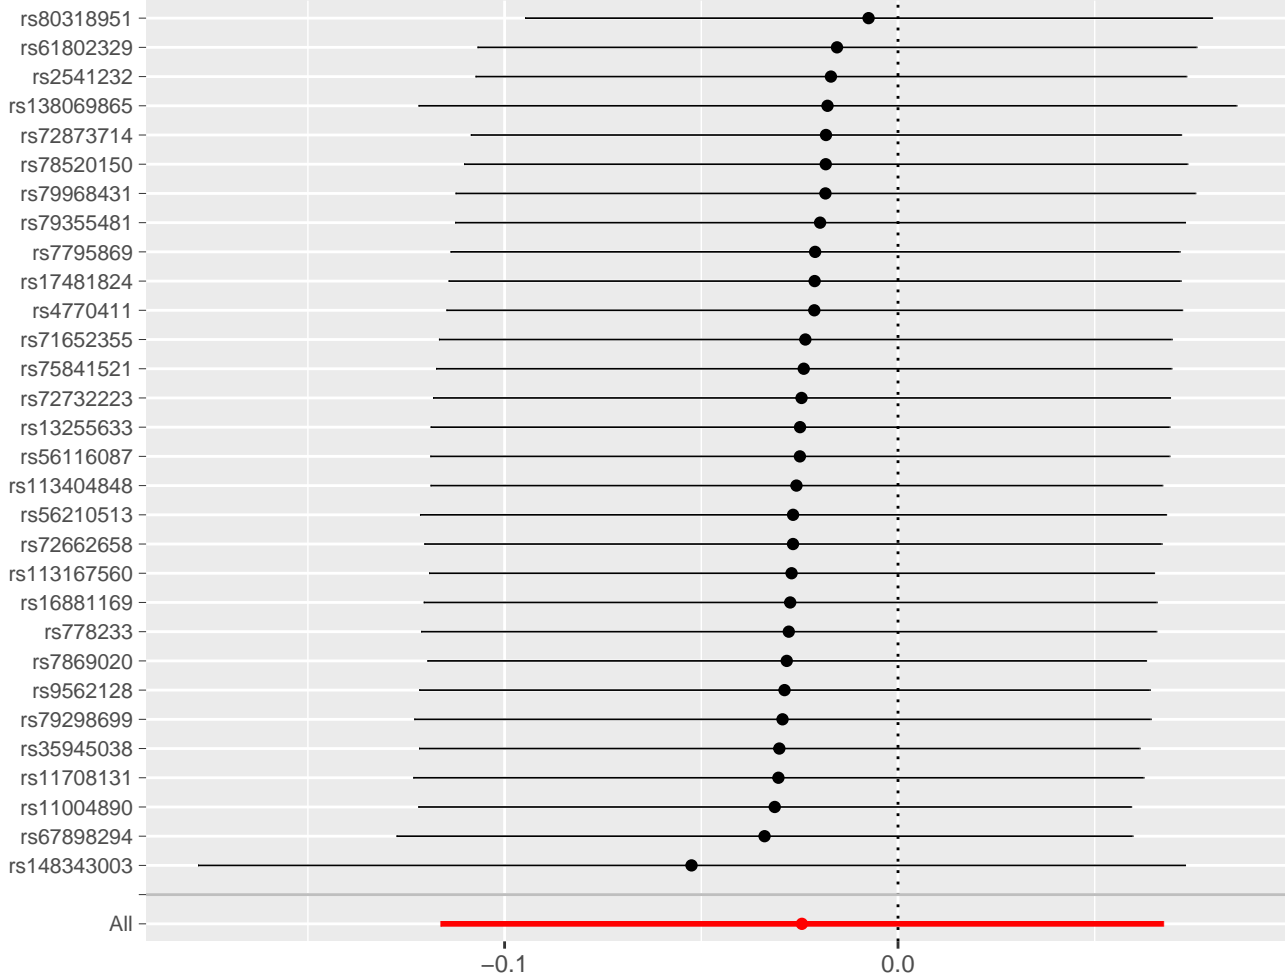

-0.1

0.0

MR leave-one-out sensitivity analysis for 'CD11c on myeloid DC' on 'Juvenile arthritis'



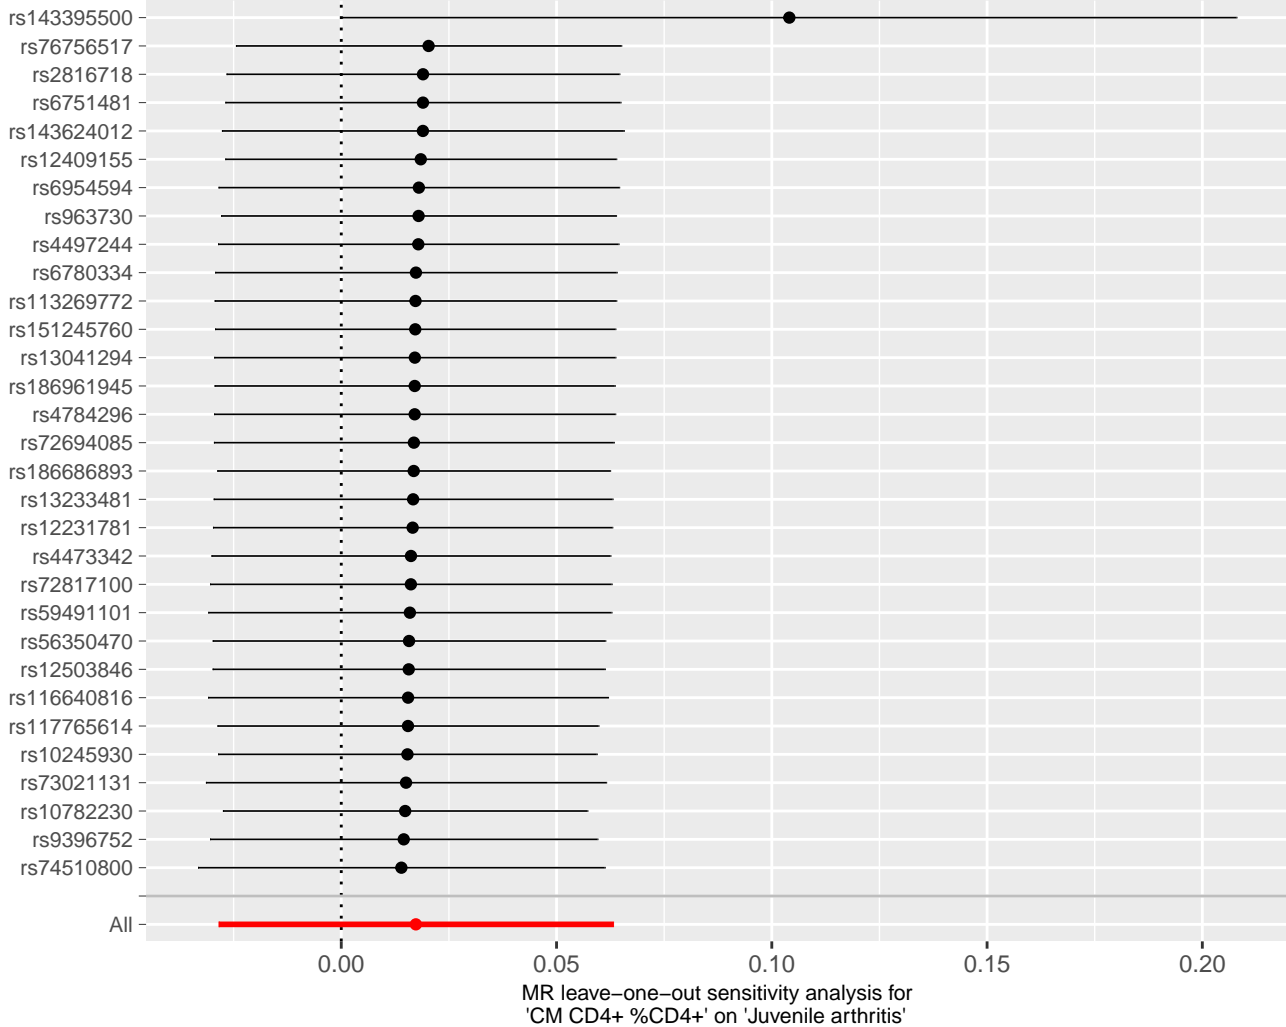

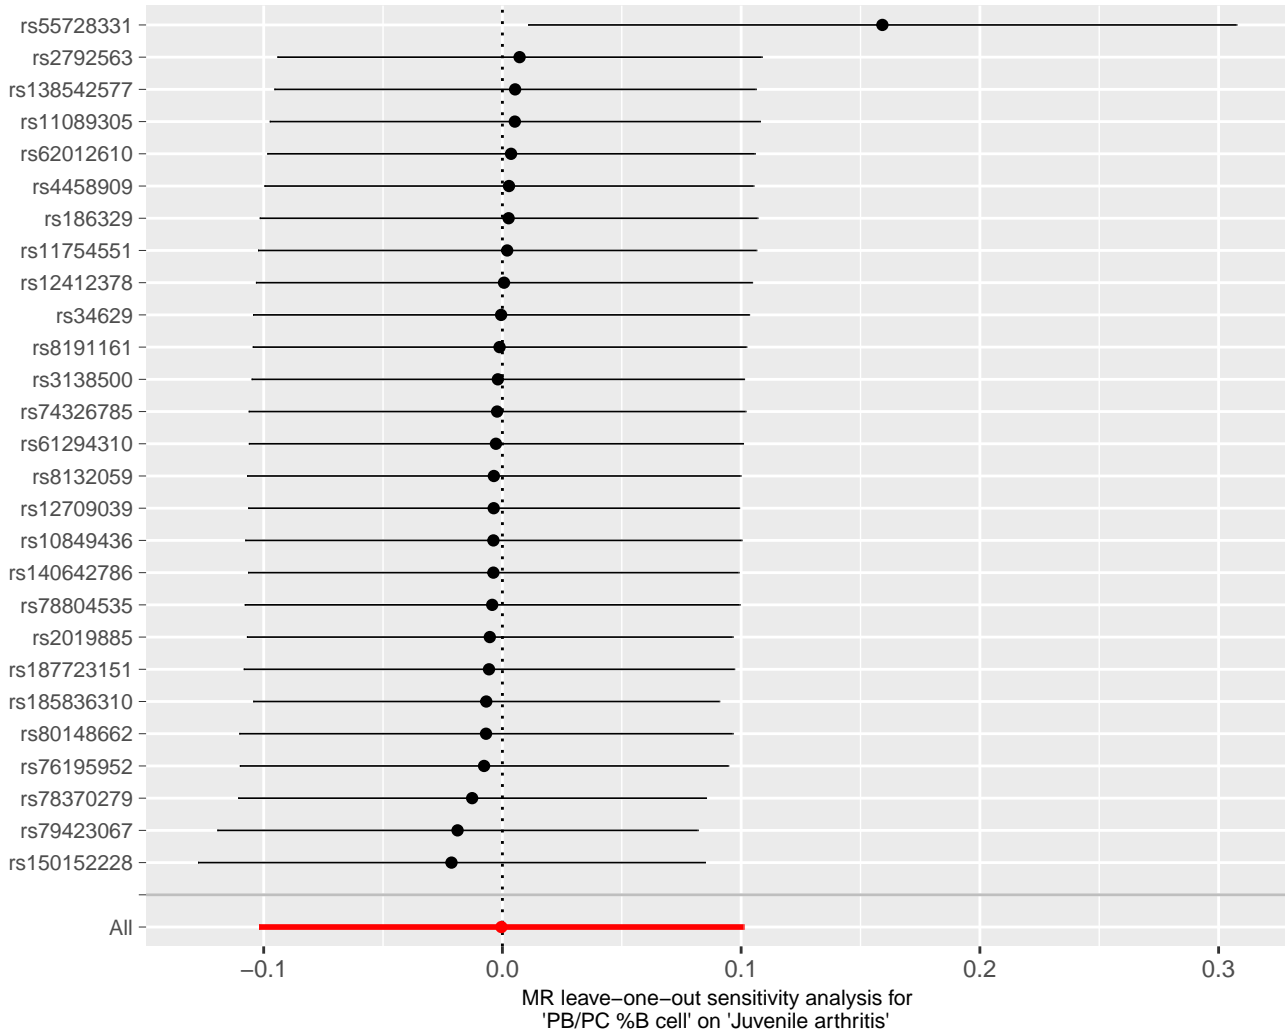

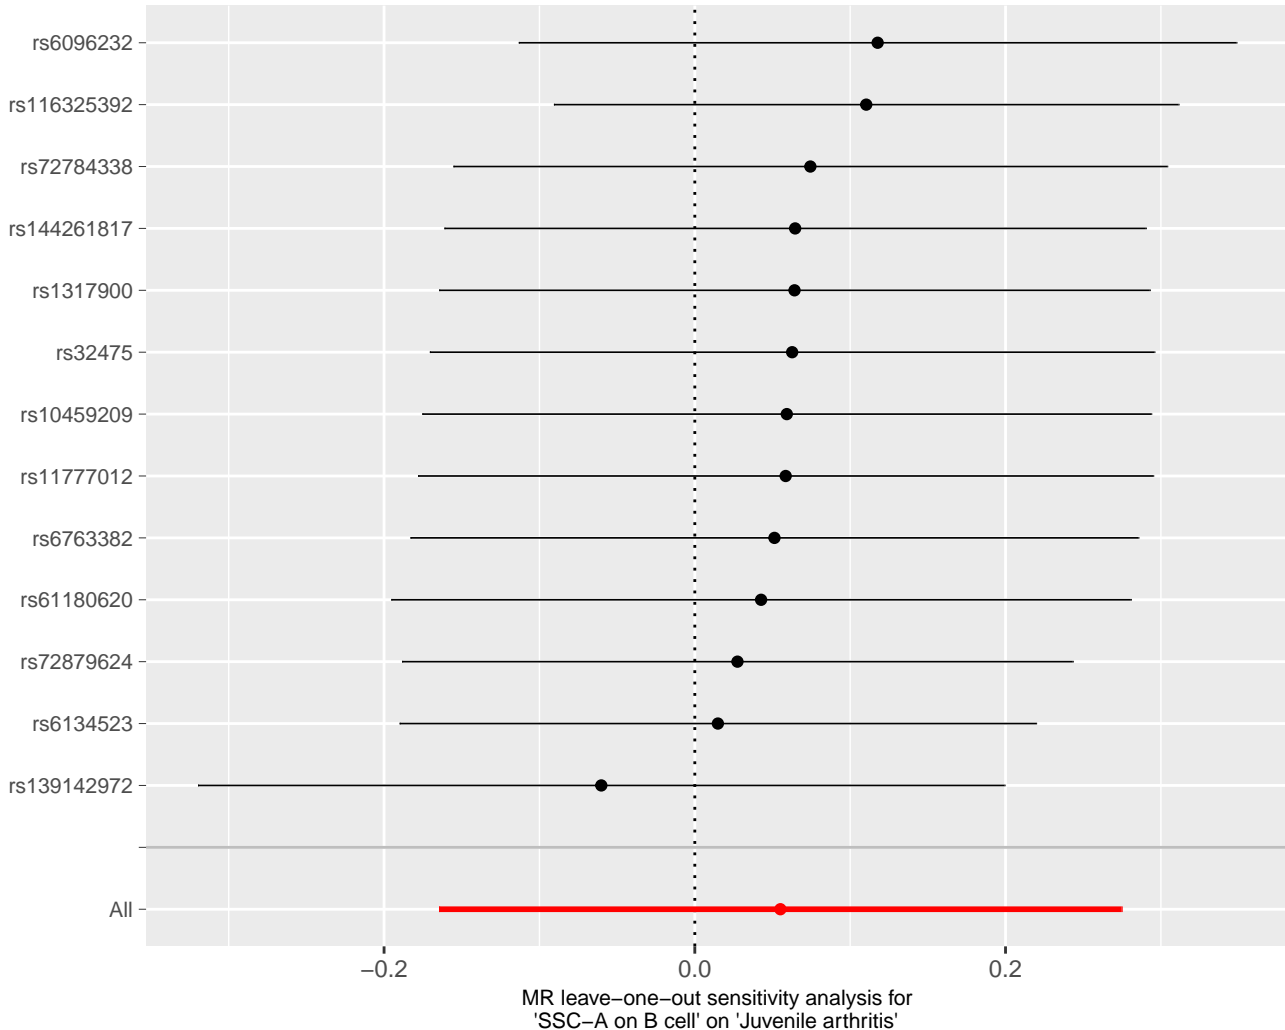

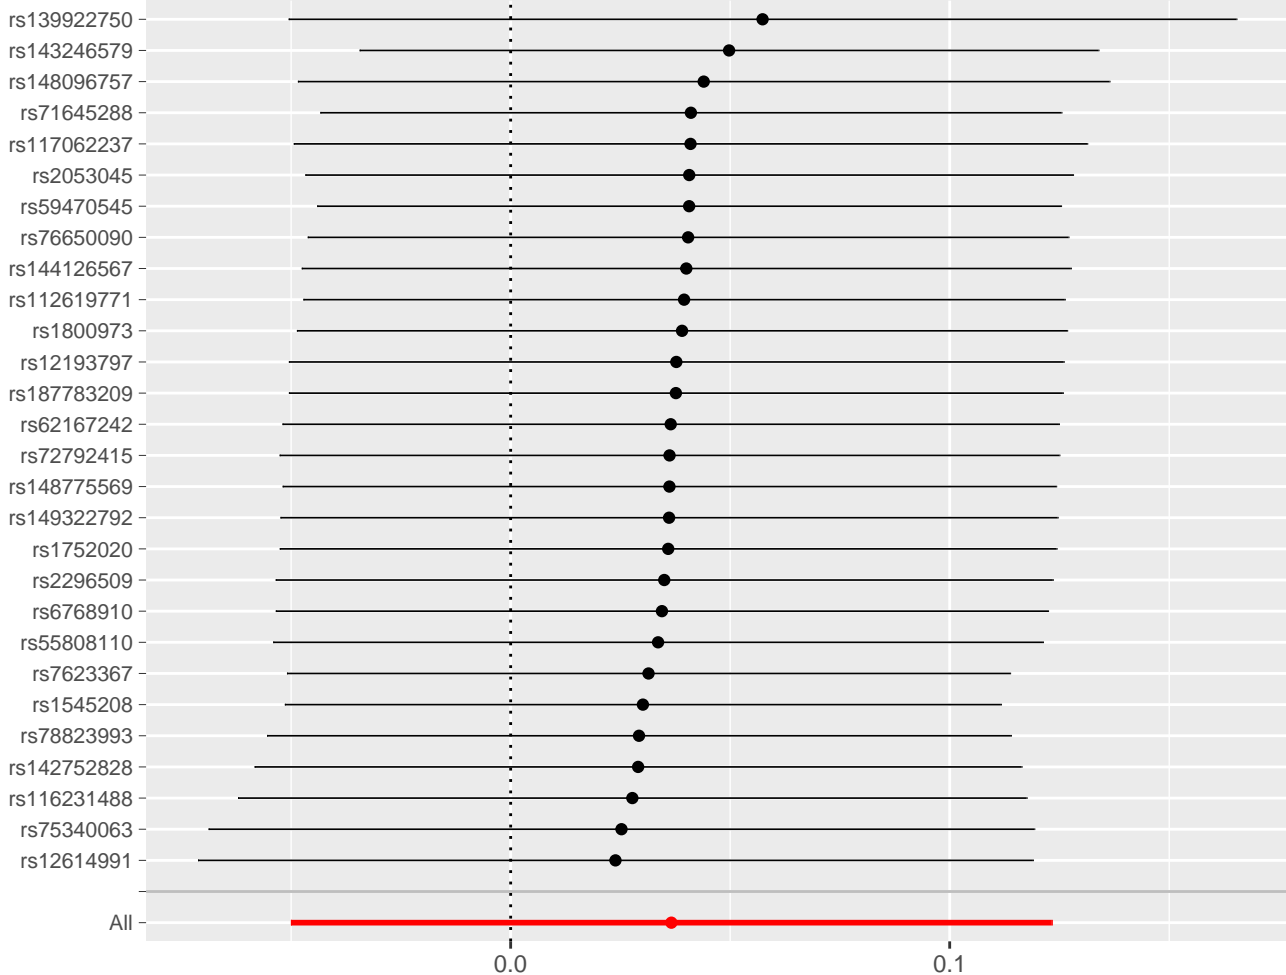

MR leave-one-out sensitivity analysis for 'CCR2 on CD14- CD16+ monocyte ' on 'Juvenile arthritis'

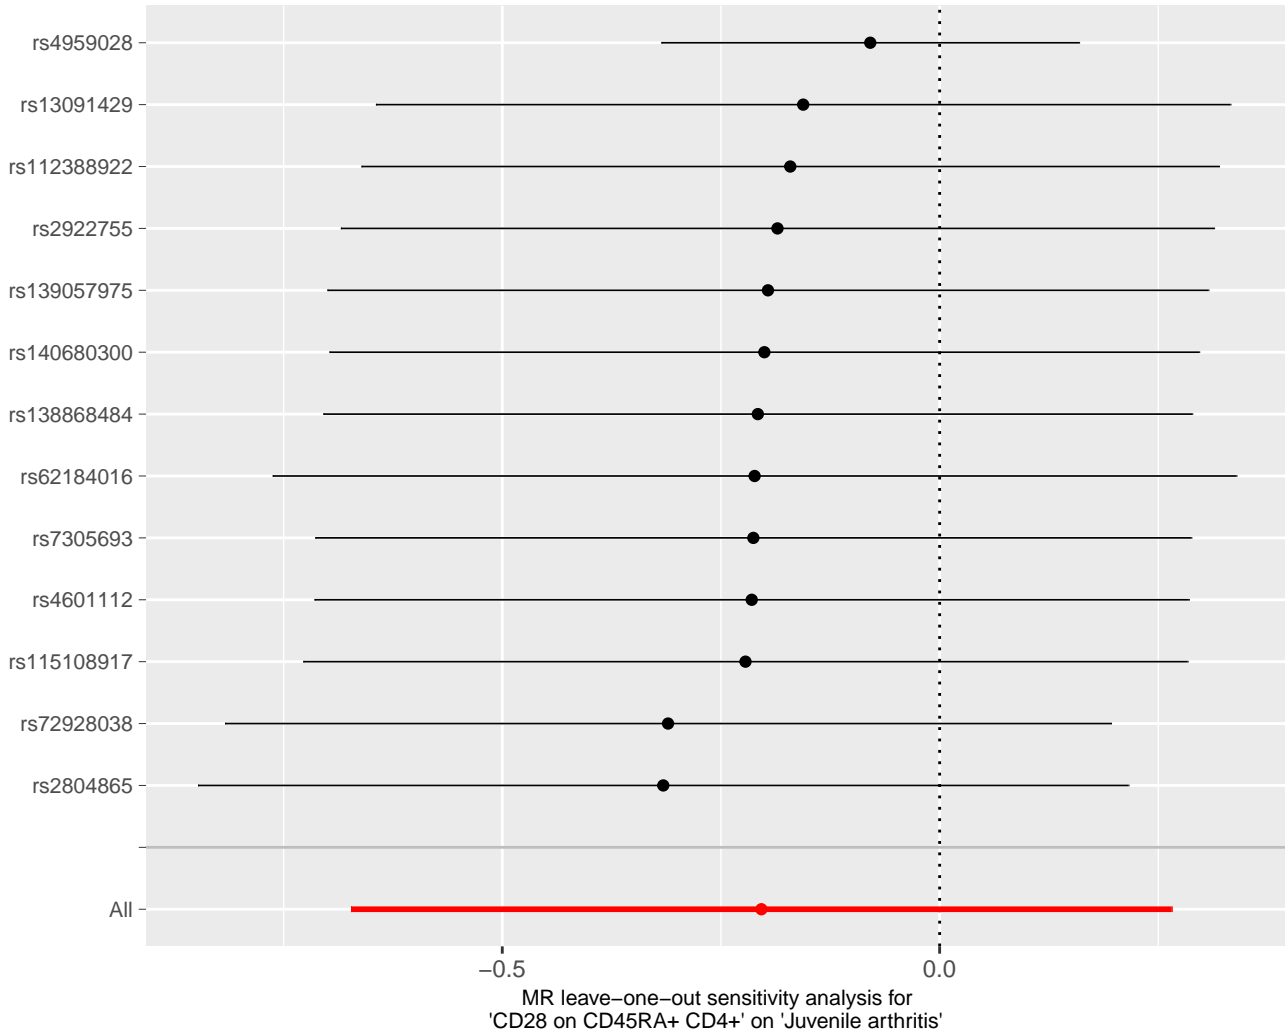

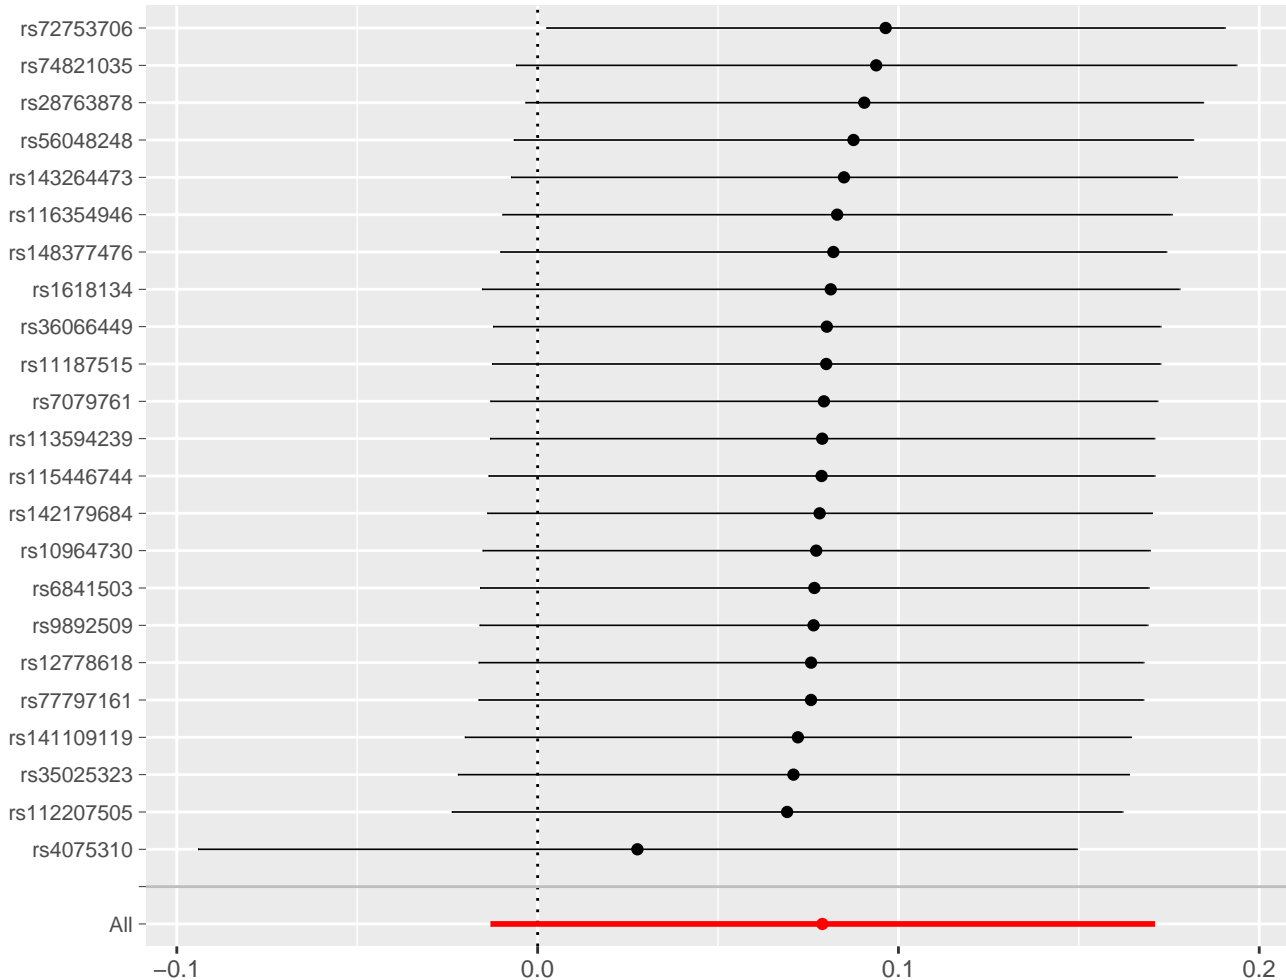

MR leave-one-out sensitivity analysis for 'CD25 on CD39+ CD4+ ' on 'Juvenile arthritis'

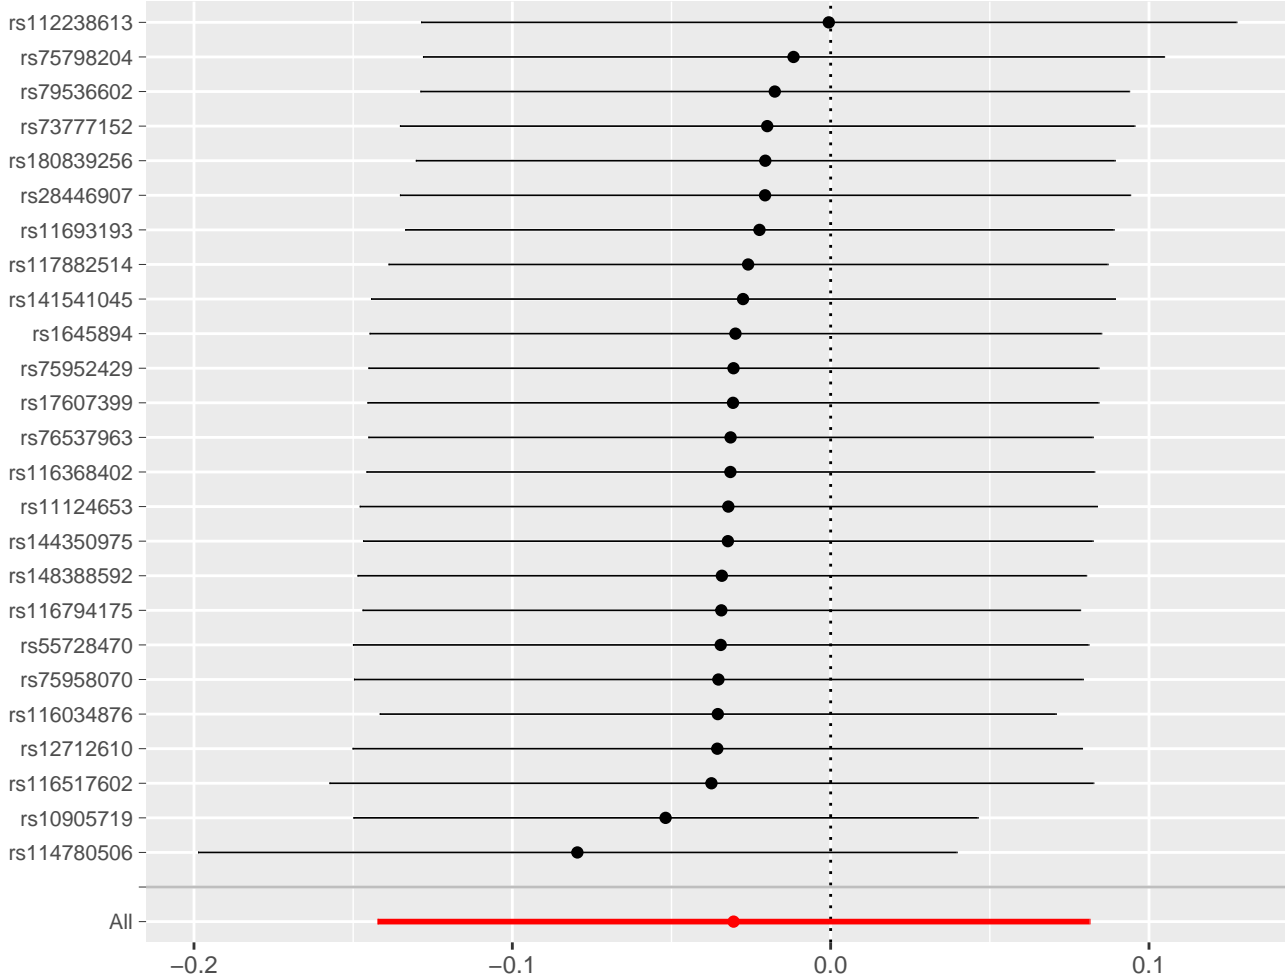

MR leave-one-out sensitivity analysis for 'CD25hi CD45RA+ CD4 not Treg AC' on 'Juvenile arthritis'

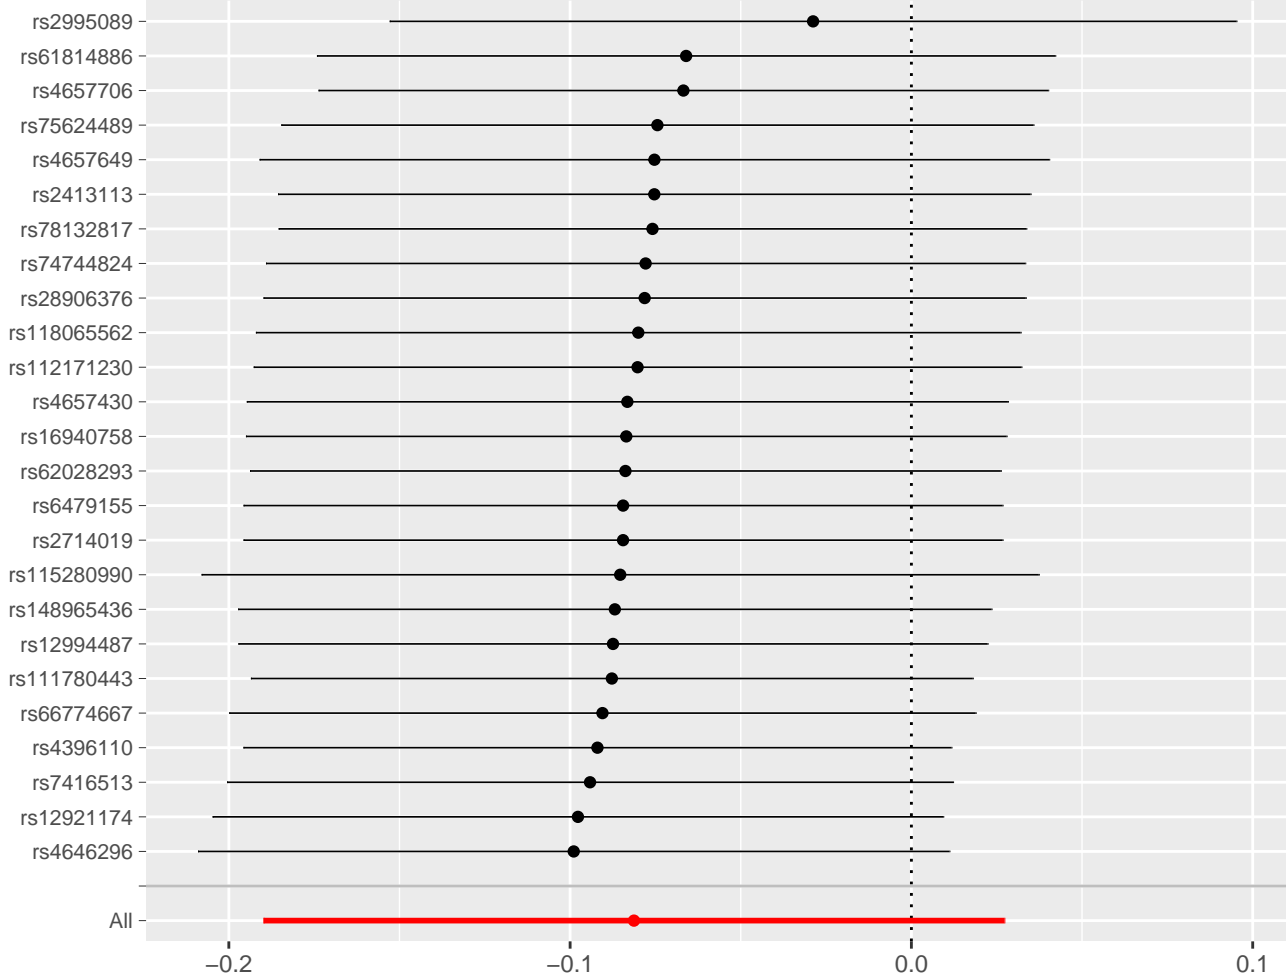

MR leave-one-out sensitivity analysis for 'CD3 on naive CD8br ' on 'Juvenile arthritis'



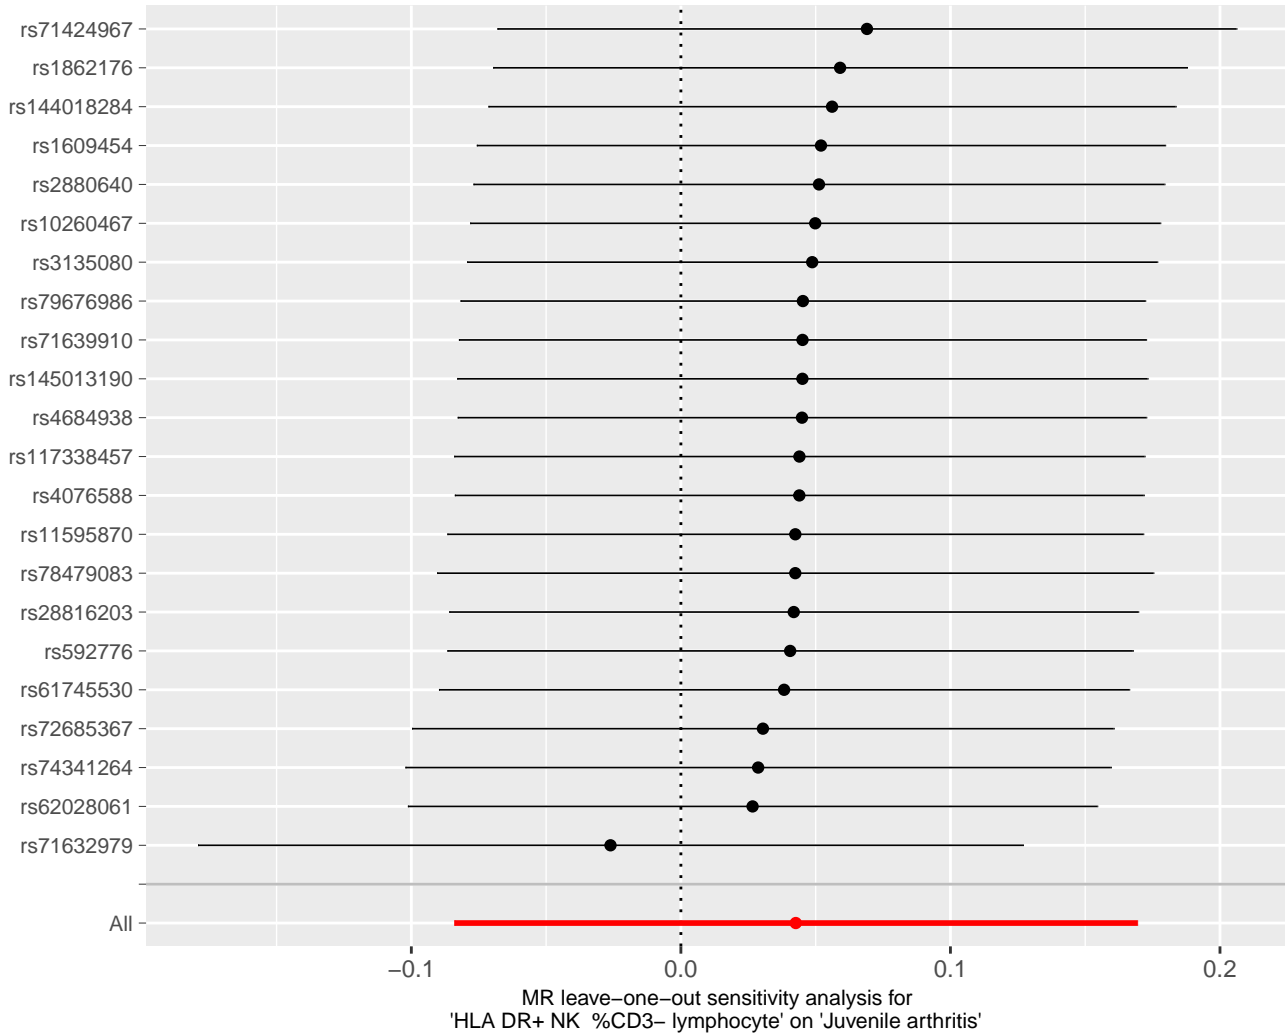

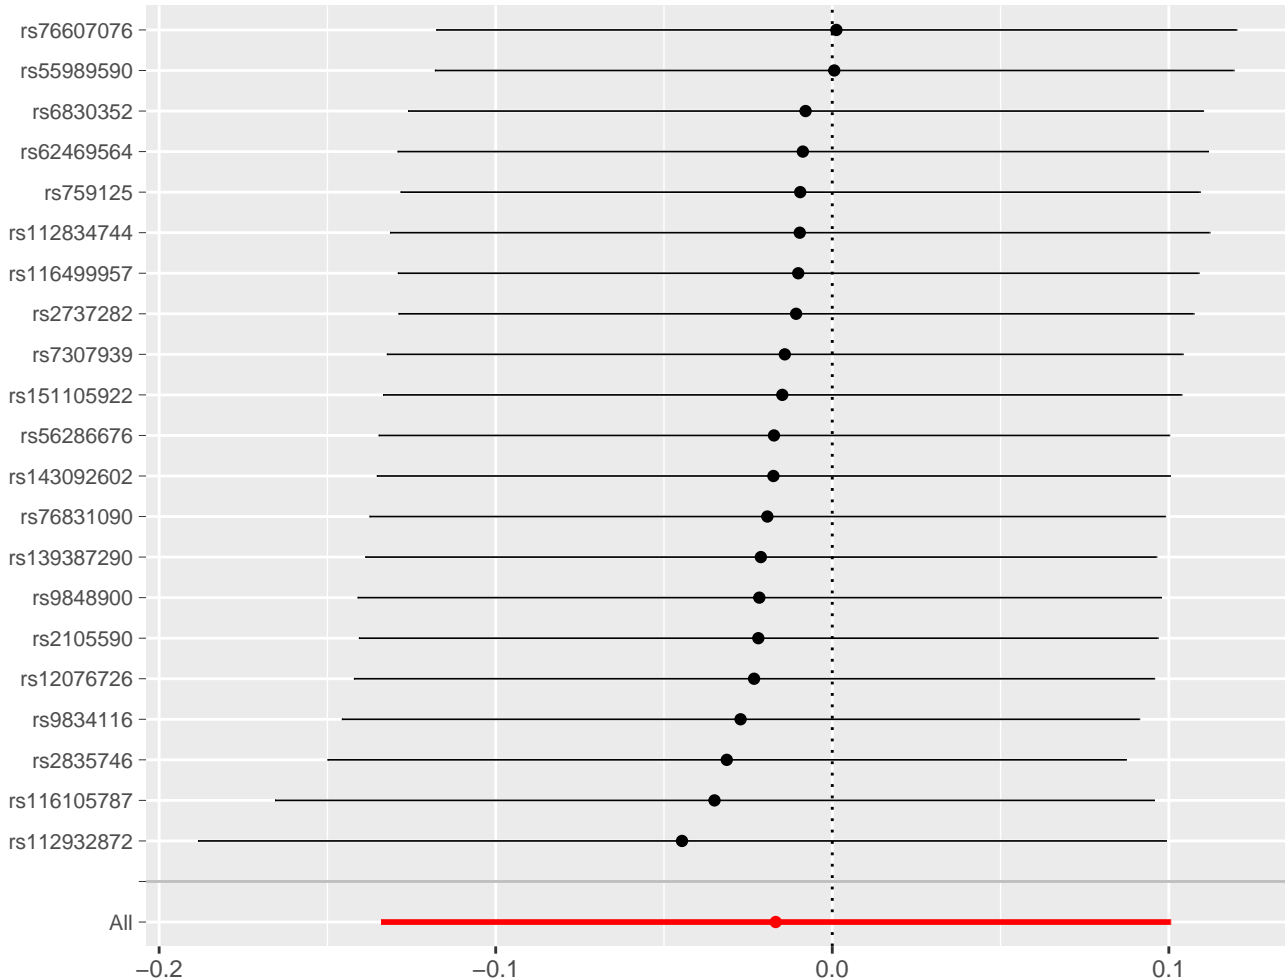

MR leave-one-out sensitivity analysis for 'CD86 on CD62L+ myeloid DC' on 'Juvenile arthritis'

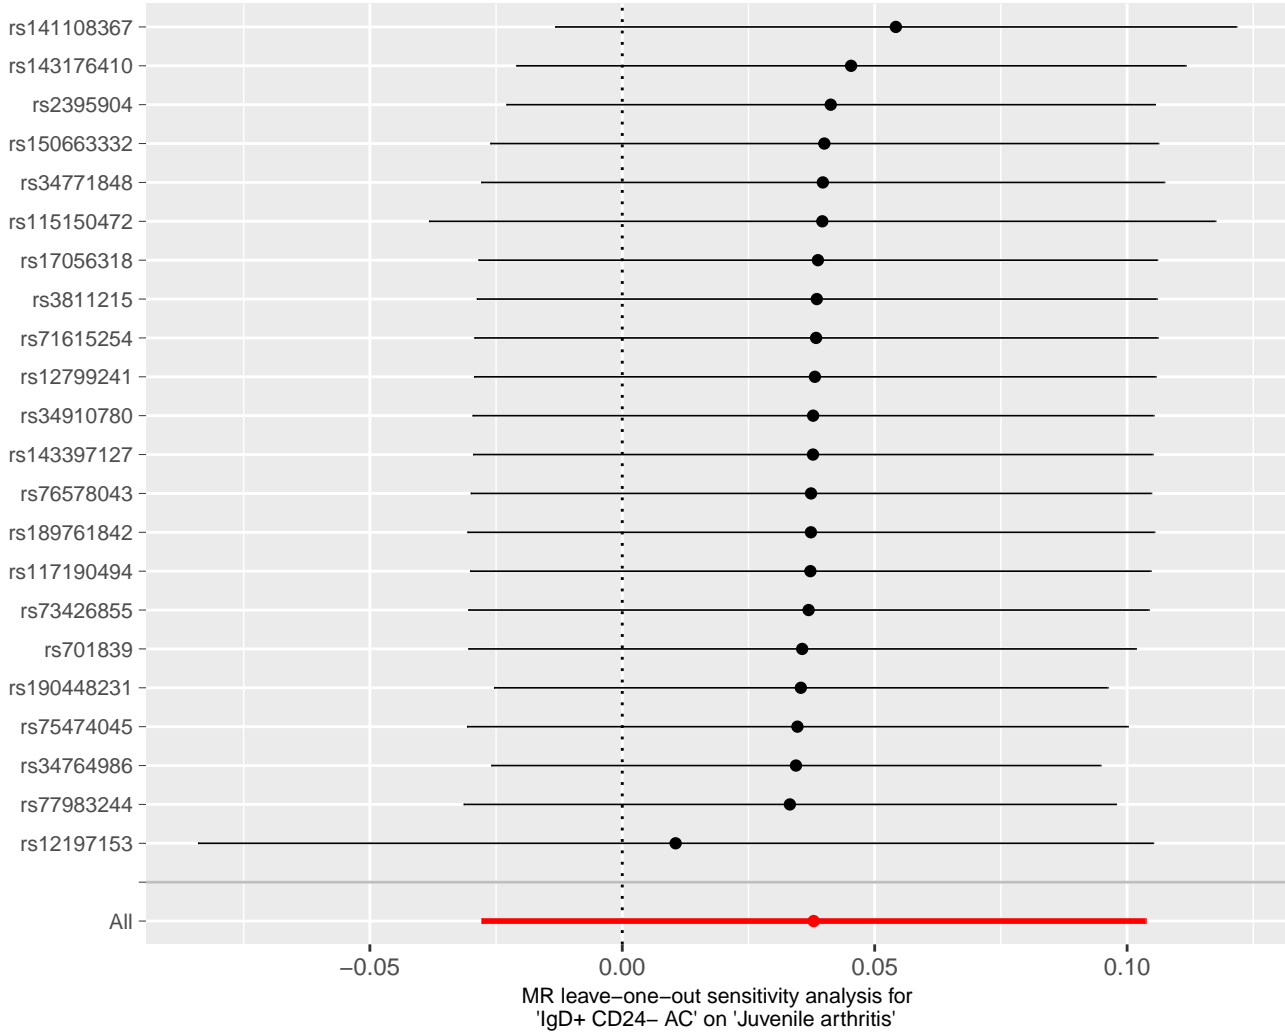

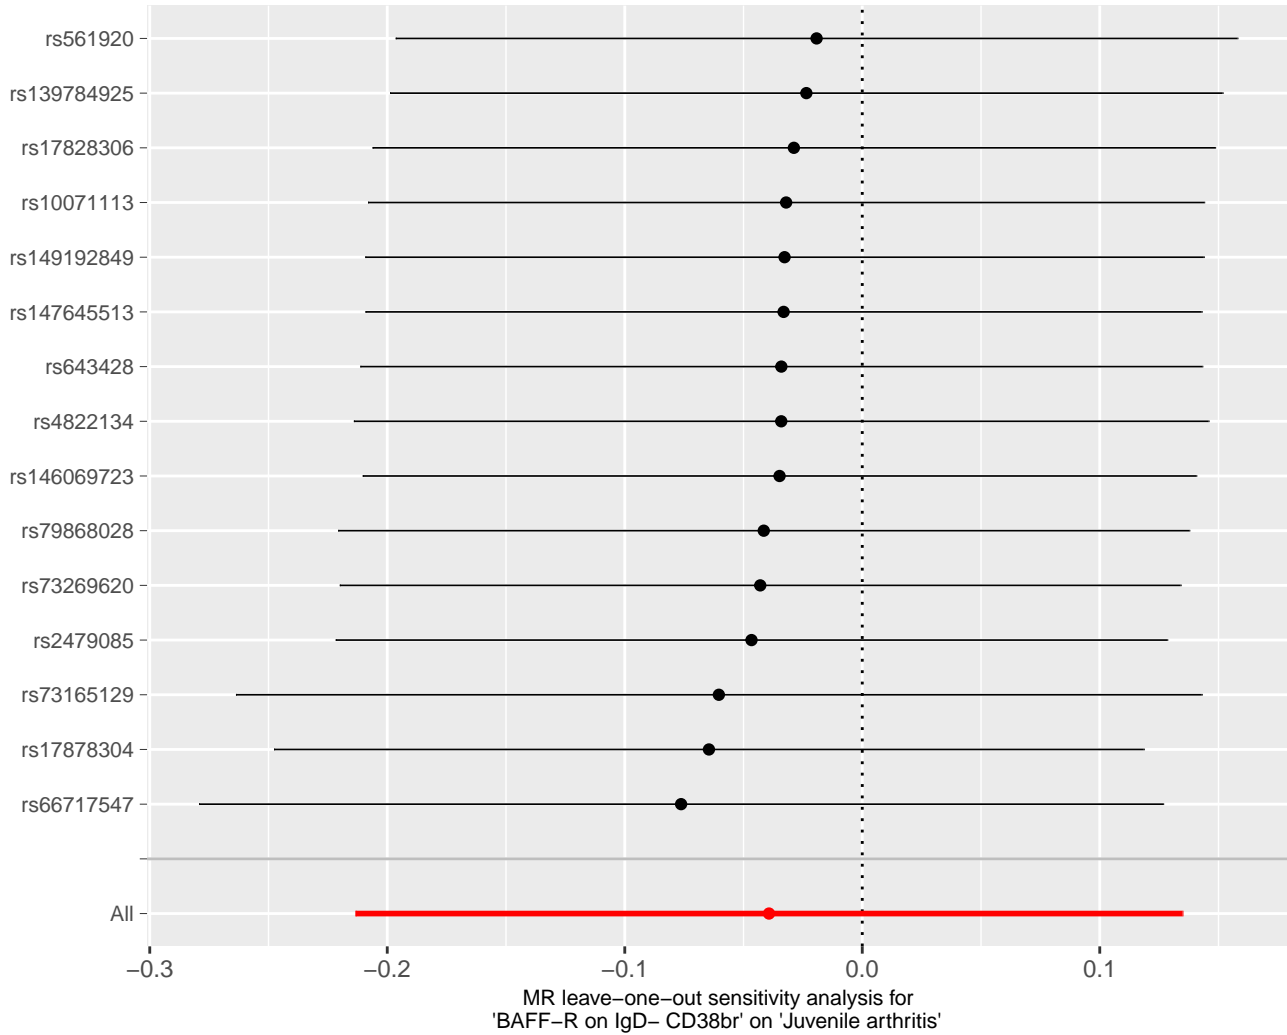

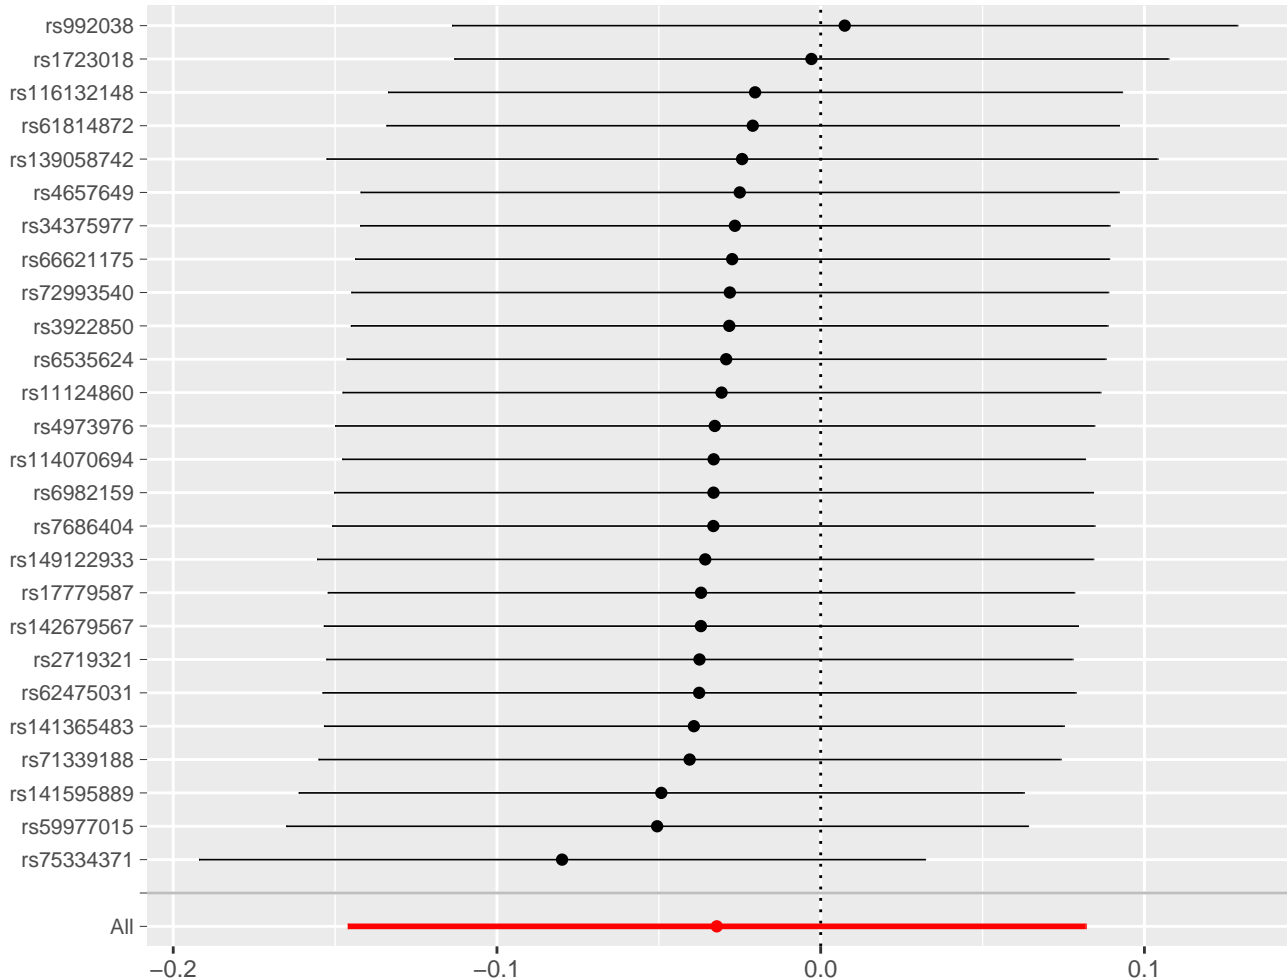

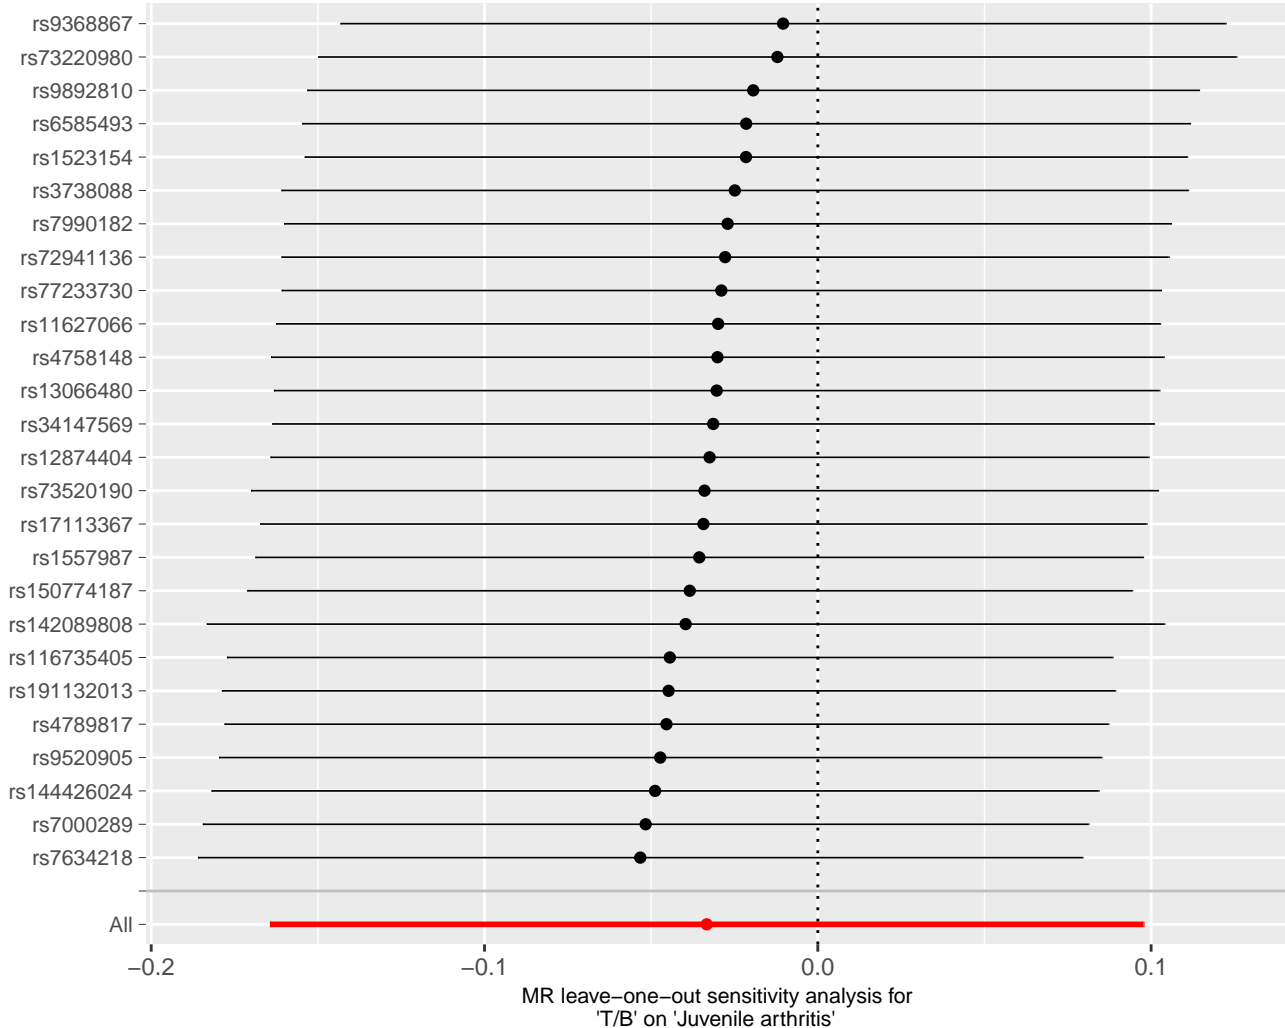

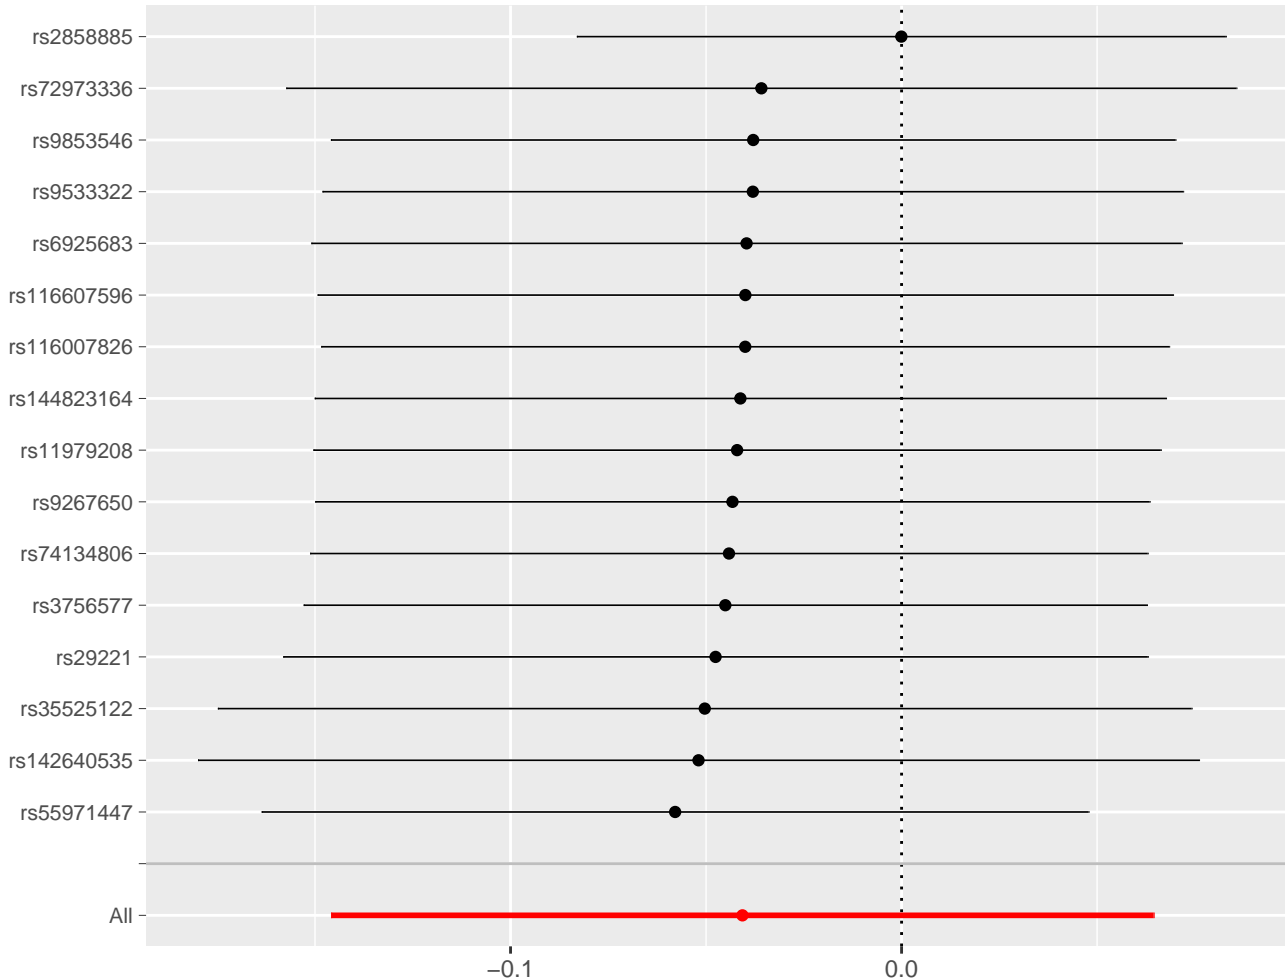

MR leave-one-out sensitivity analysis for 'HLA DR on myeloid DC' on 'Juvenile arthritis'

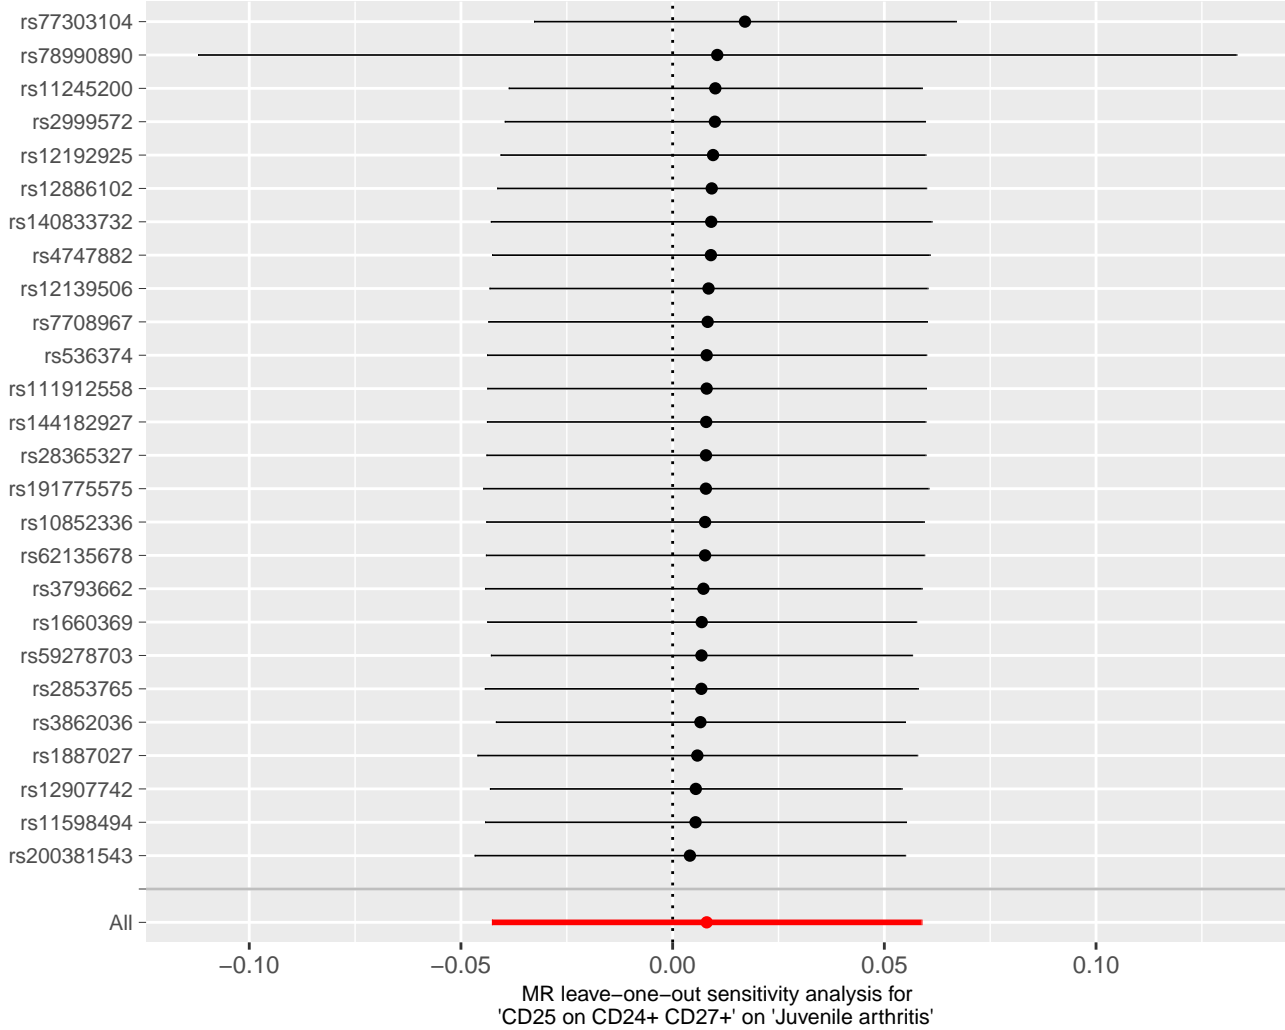



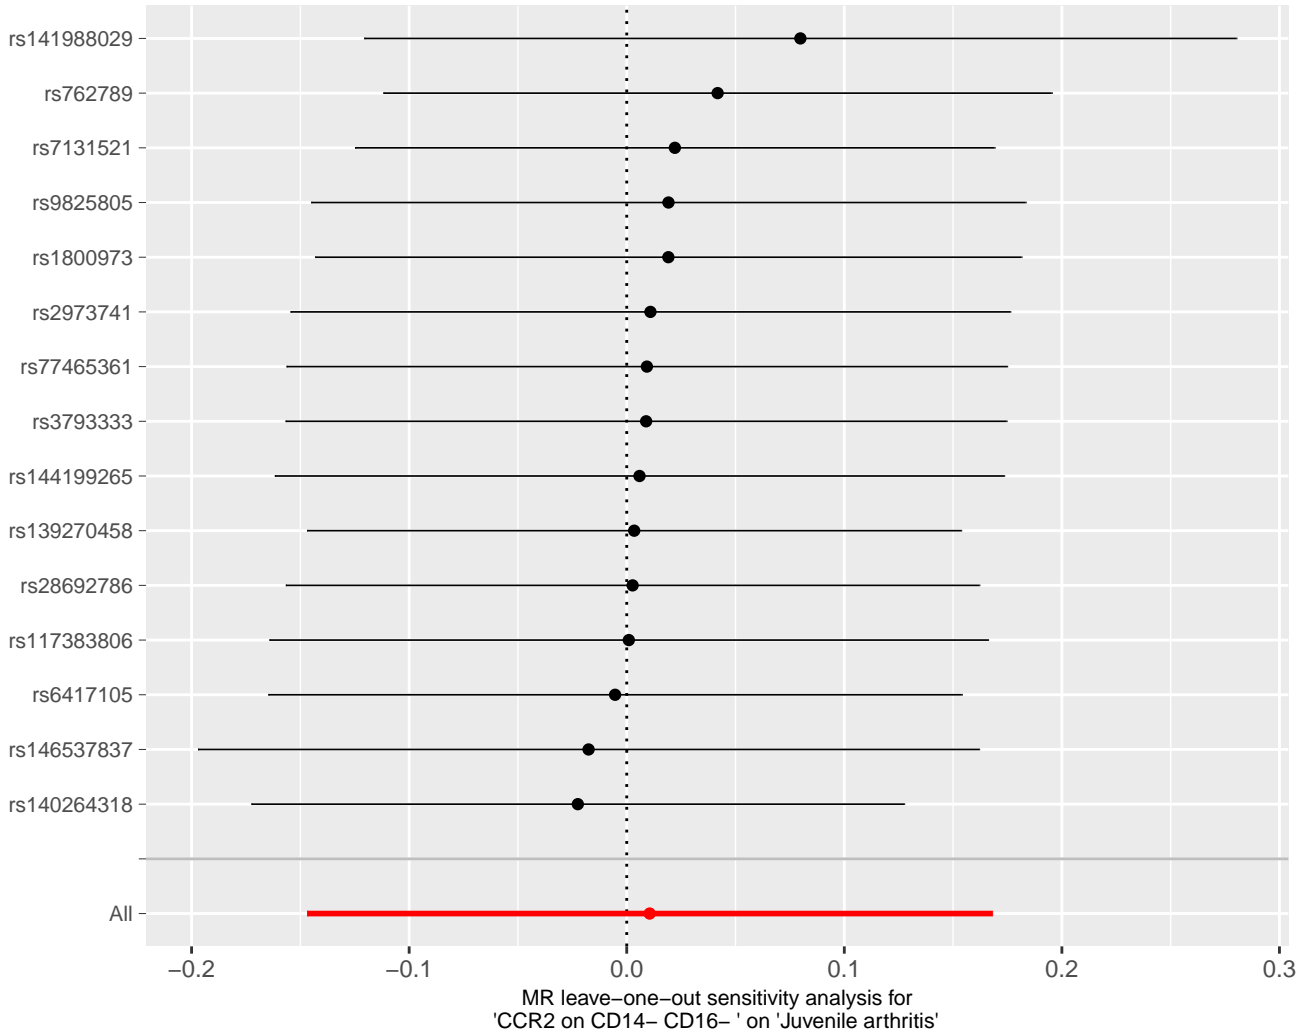

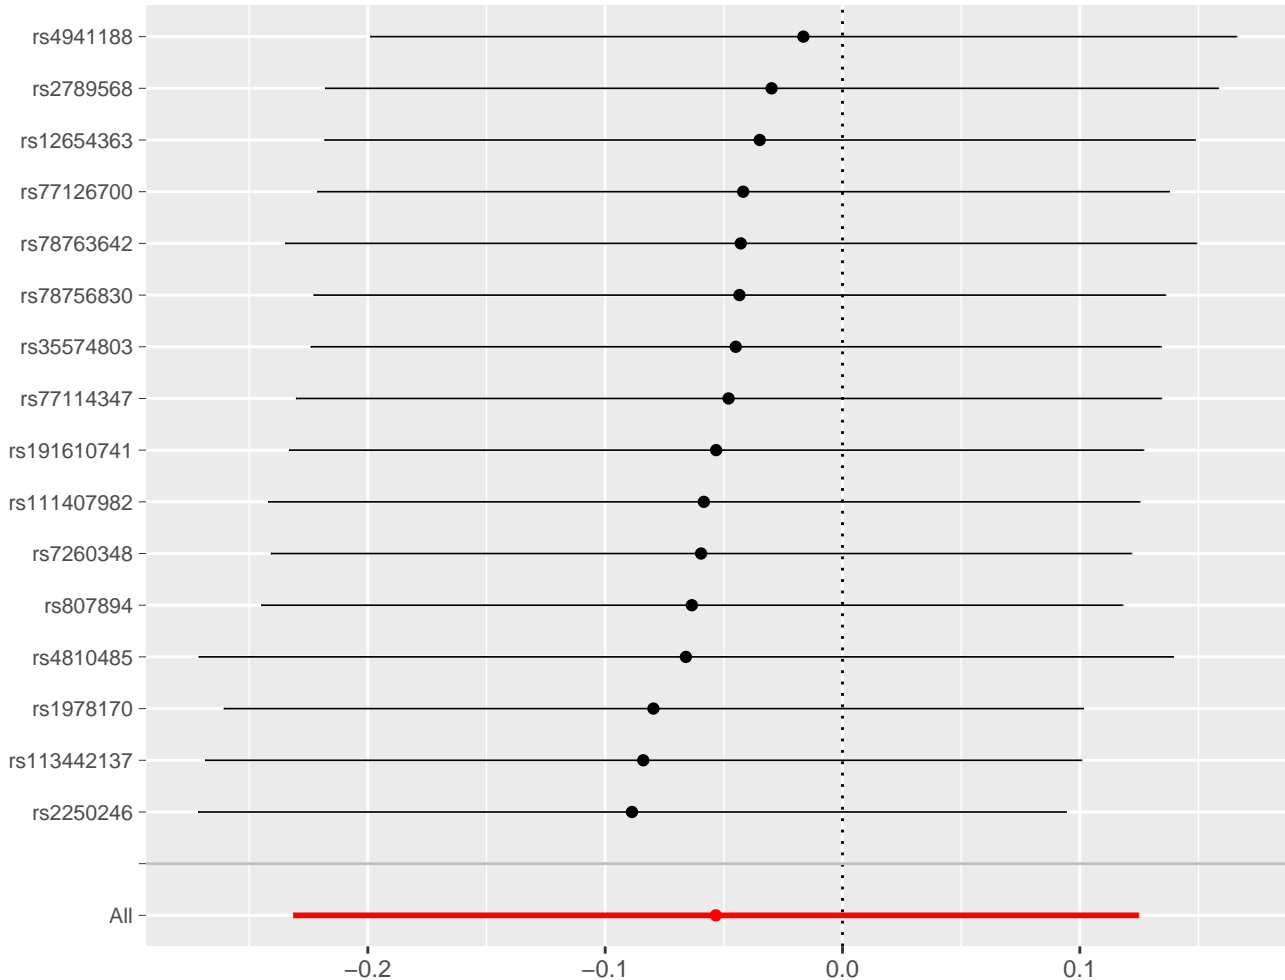

MR leave-one-out sensitivity analysis for 'IgD- CD27- %lymphocyte' on 'Juvenile arthritis'

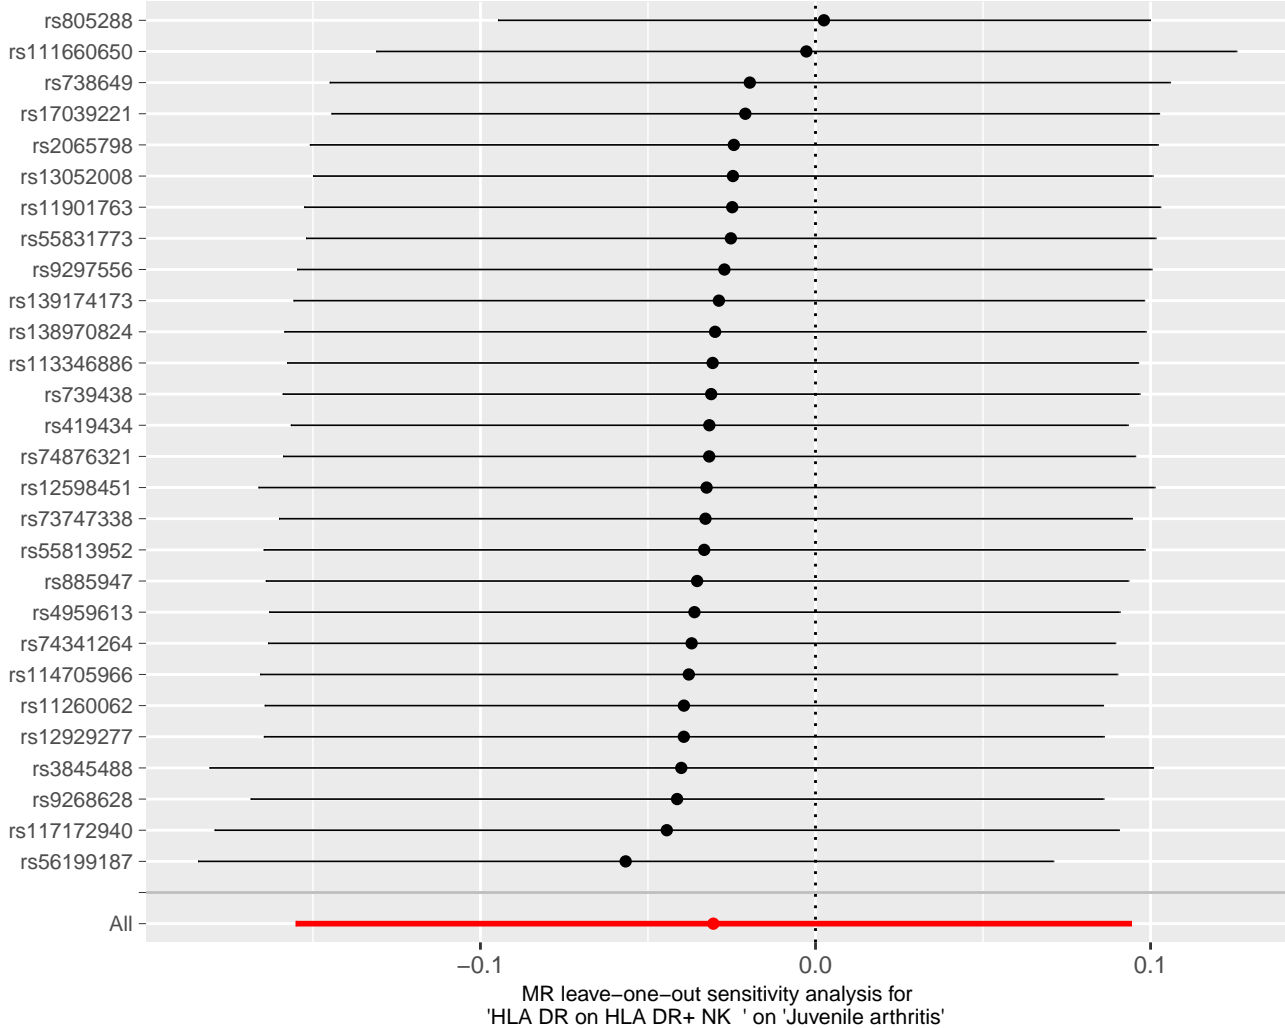

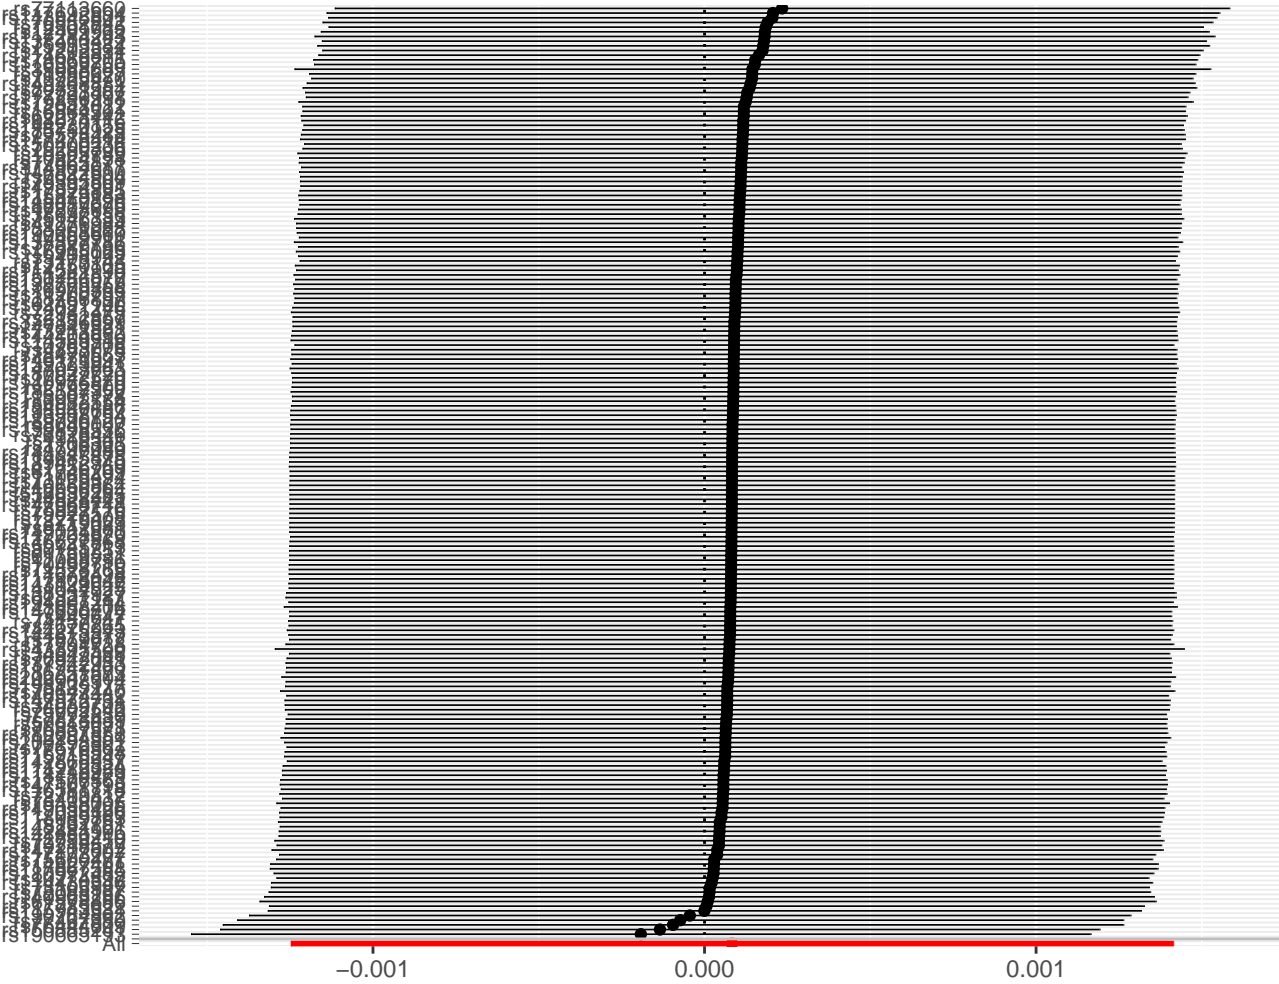

MR leave-one-out sensitivity analysis for  
'CD45RA+ CD28- CD8br %T cell' on 'Juvenile arthritis'

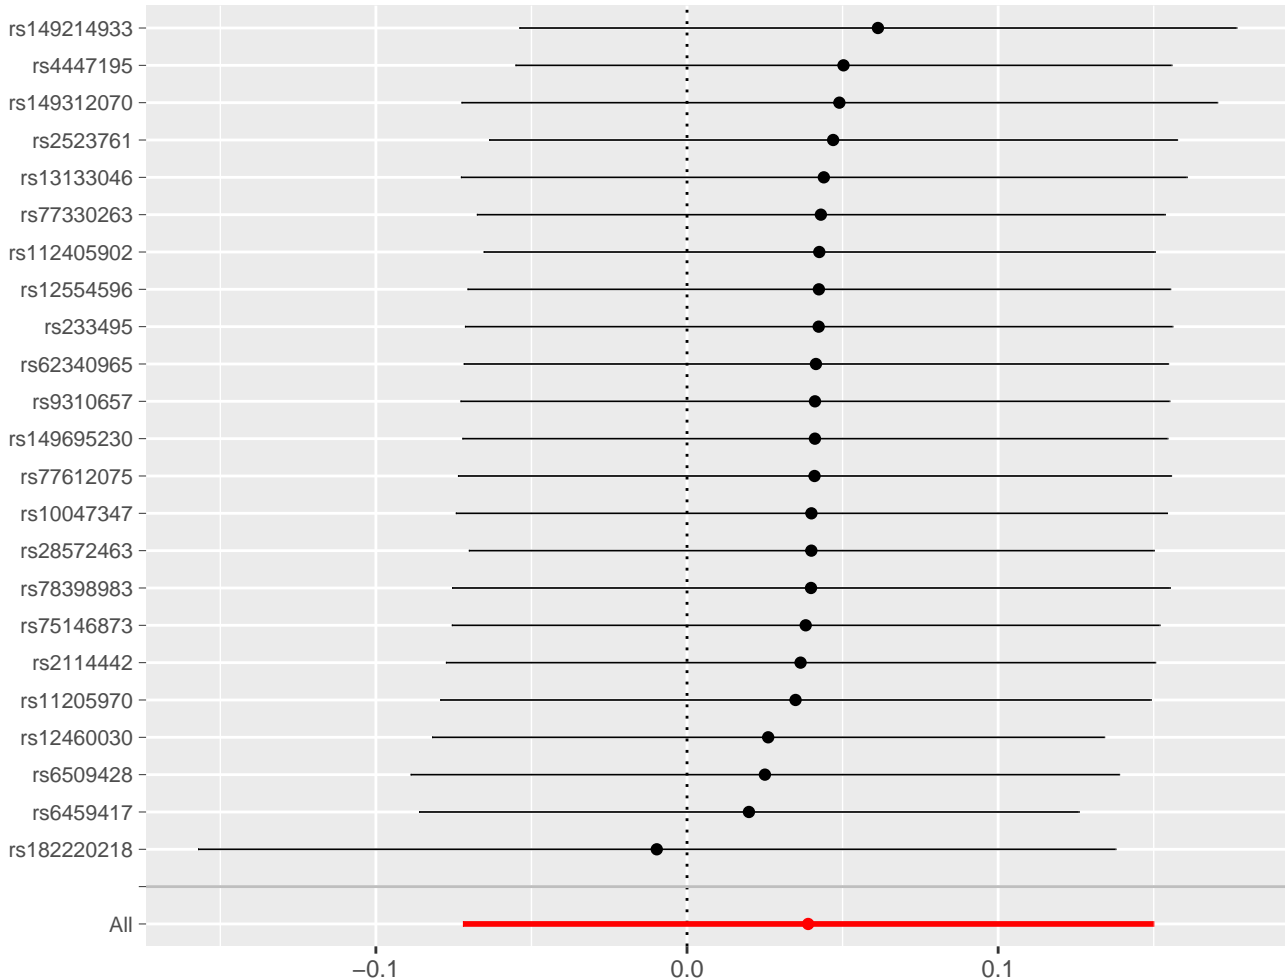

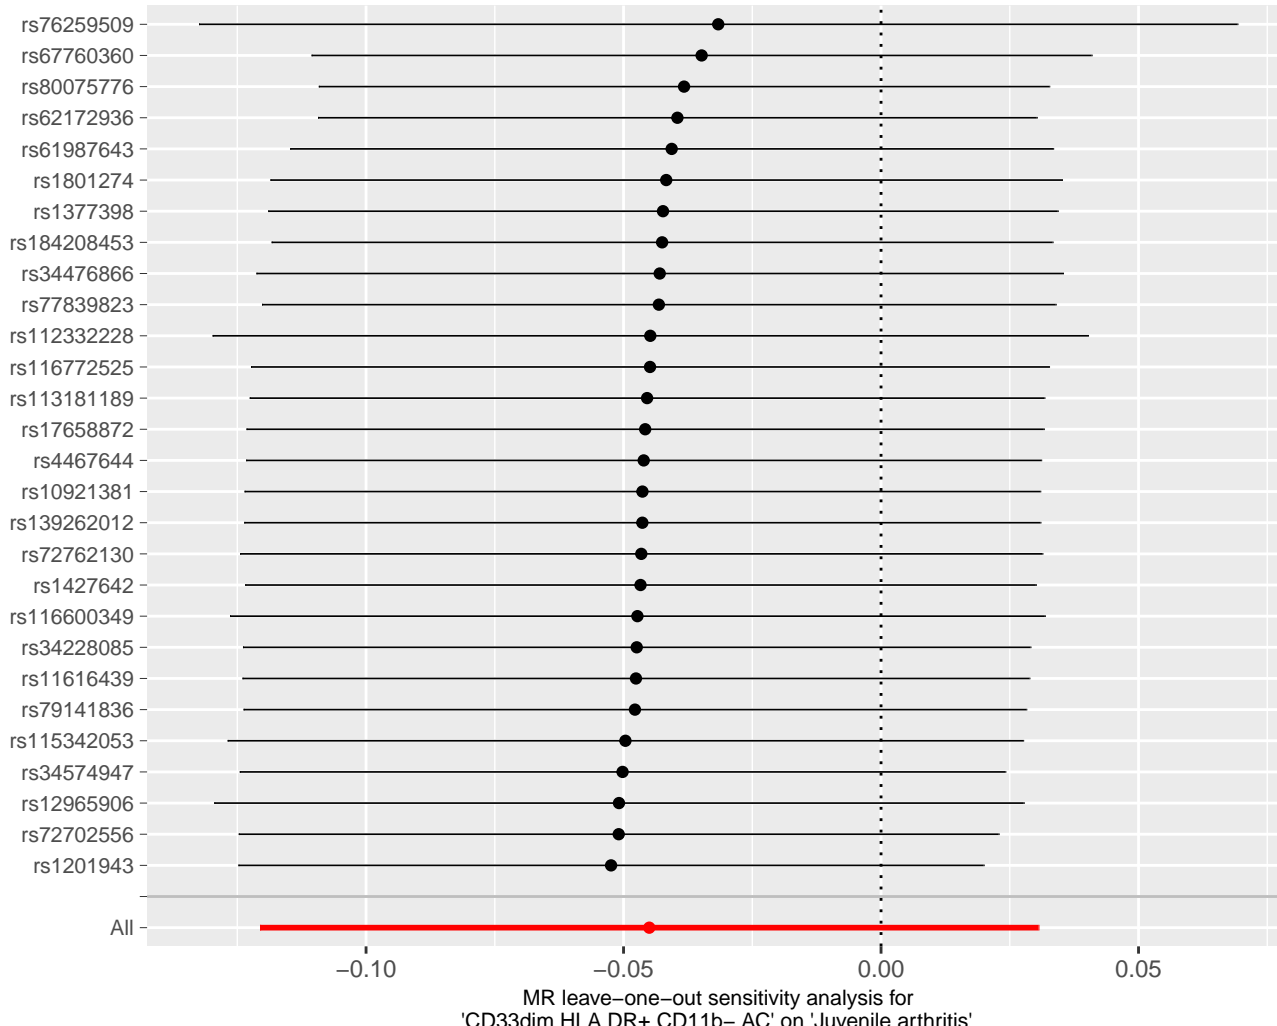

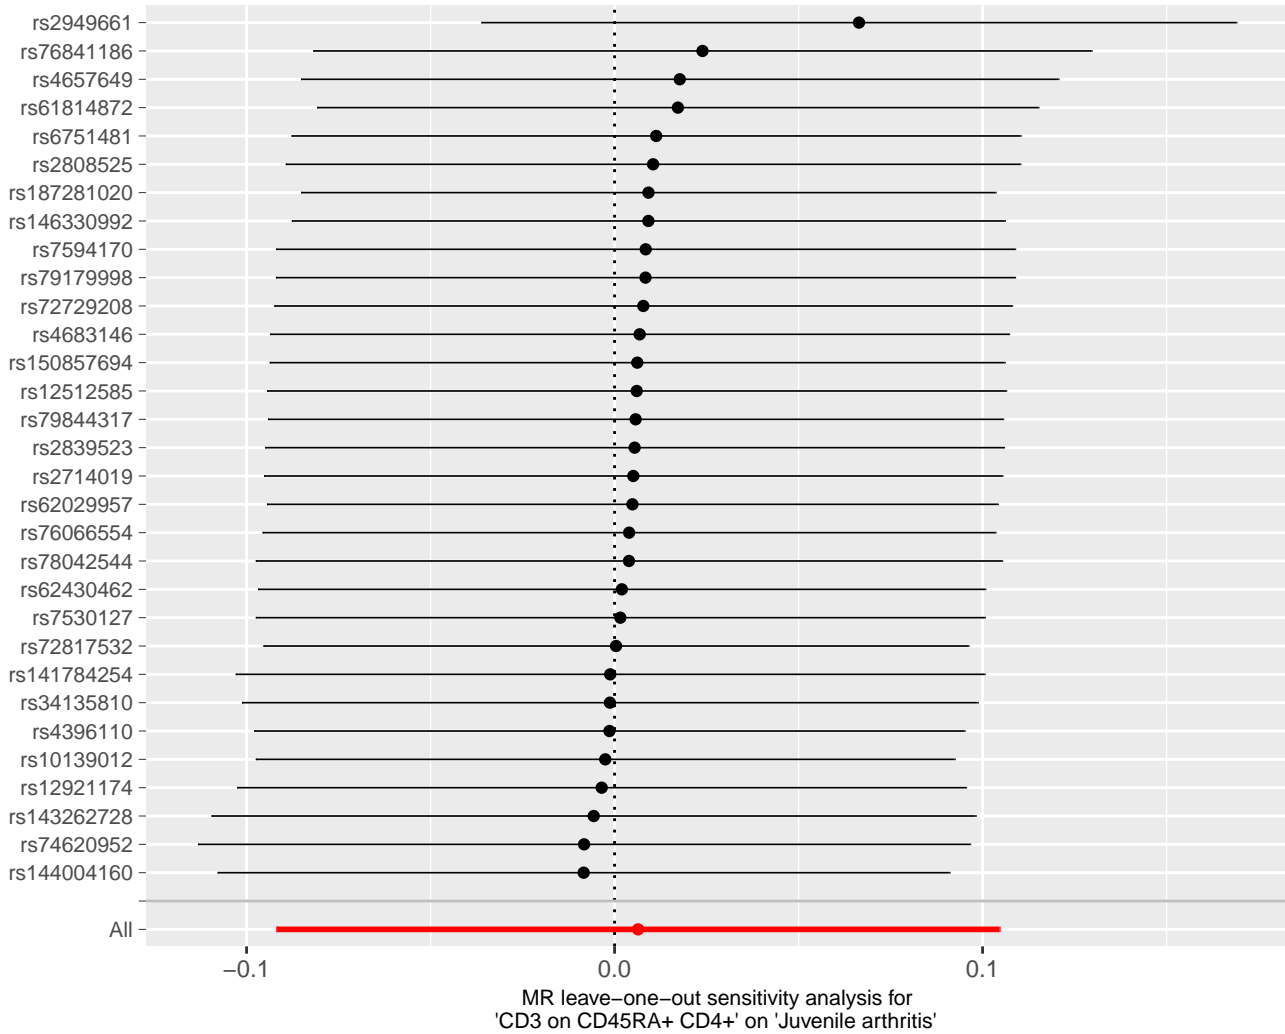

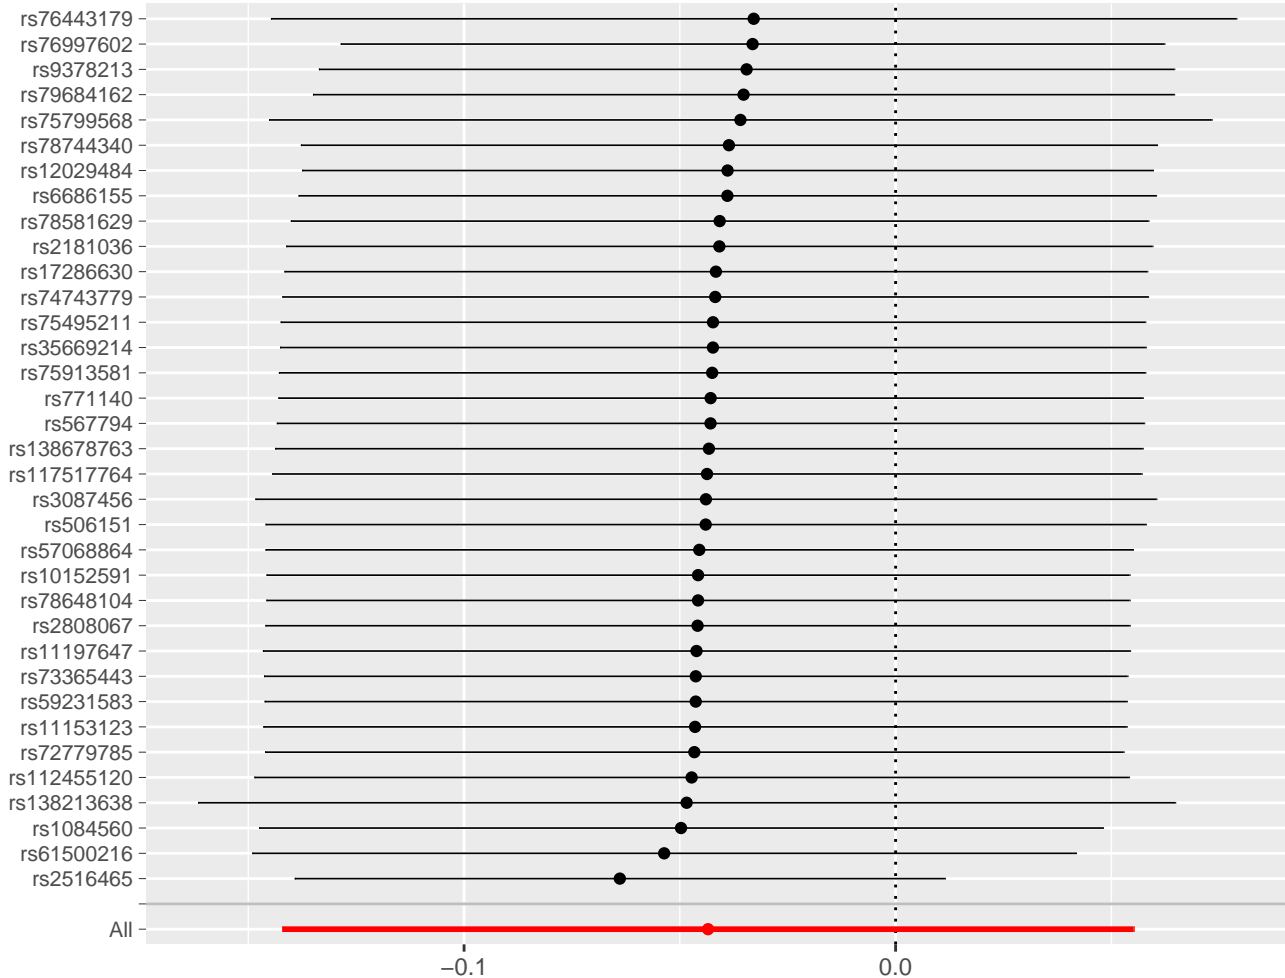

MR leave-one-out sensitivity analysis for 'HLA DR+ CD8br AC' on 'Juvenile arthritis'



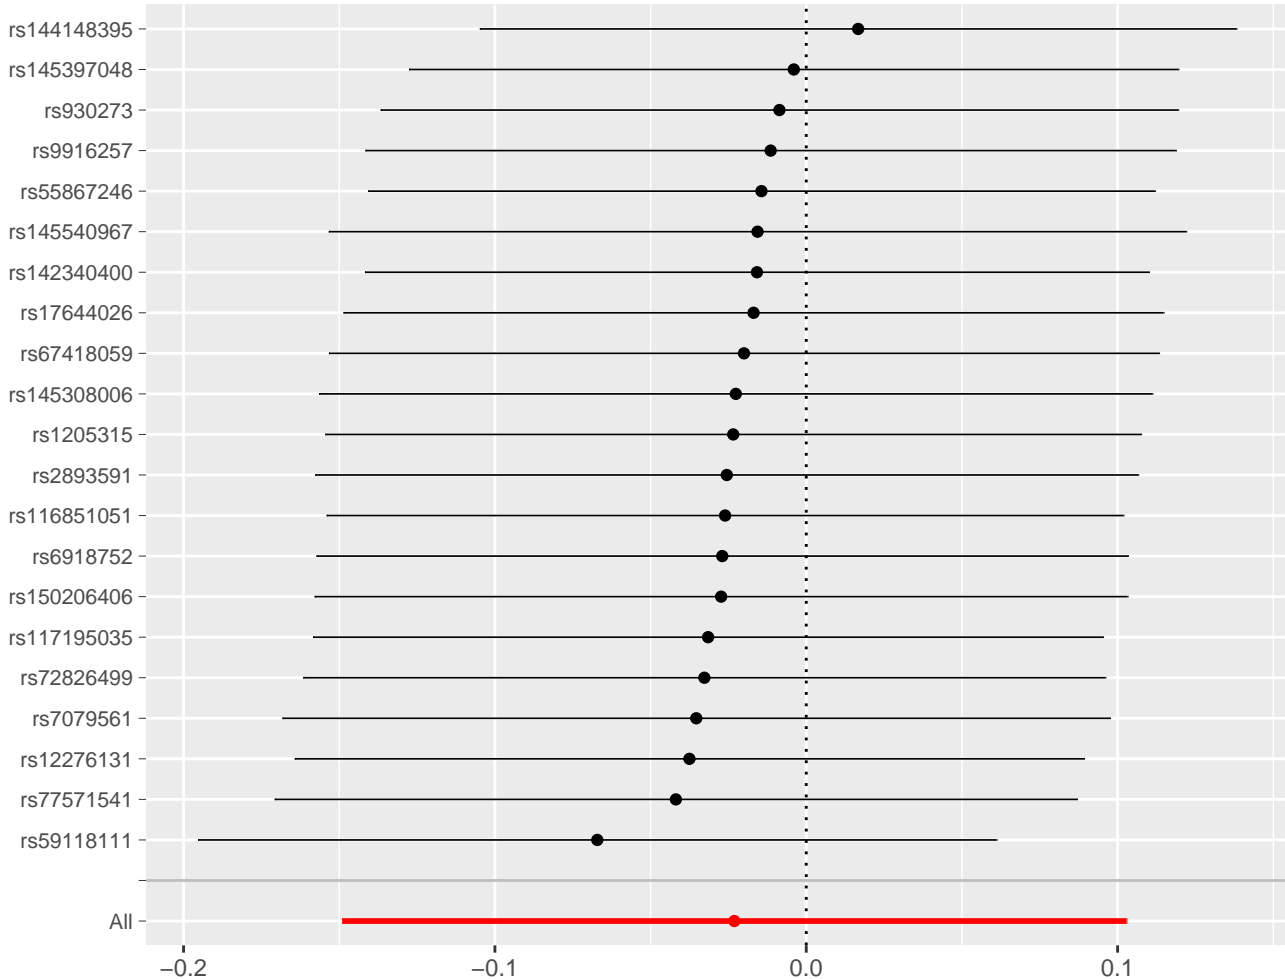

MR leave-one-out sensitivity analysis for 'CD33-HLA DR-AC' on 'Juvenile arthritis'

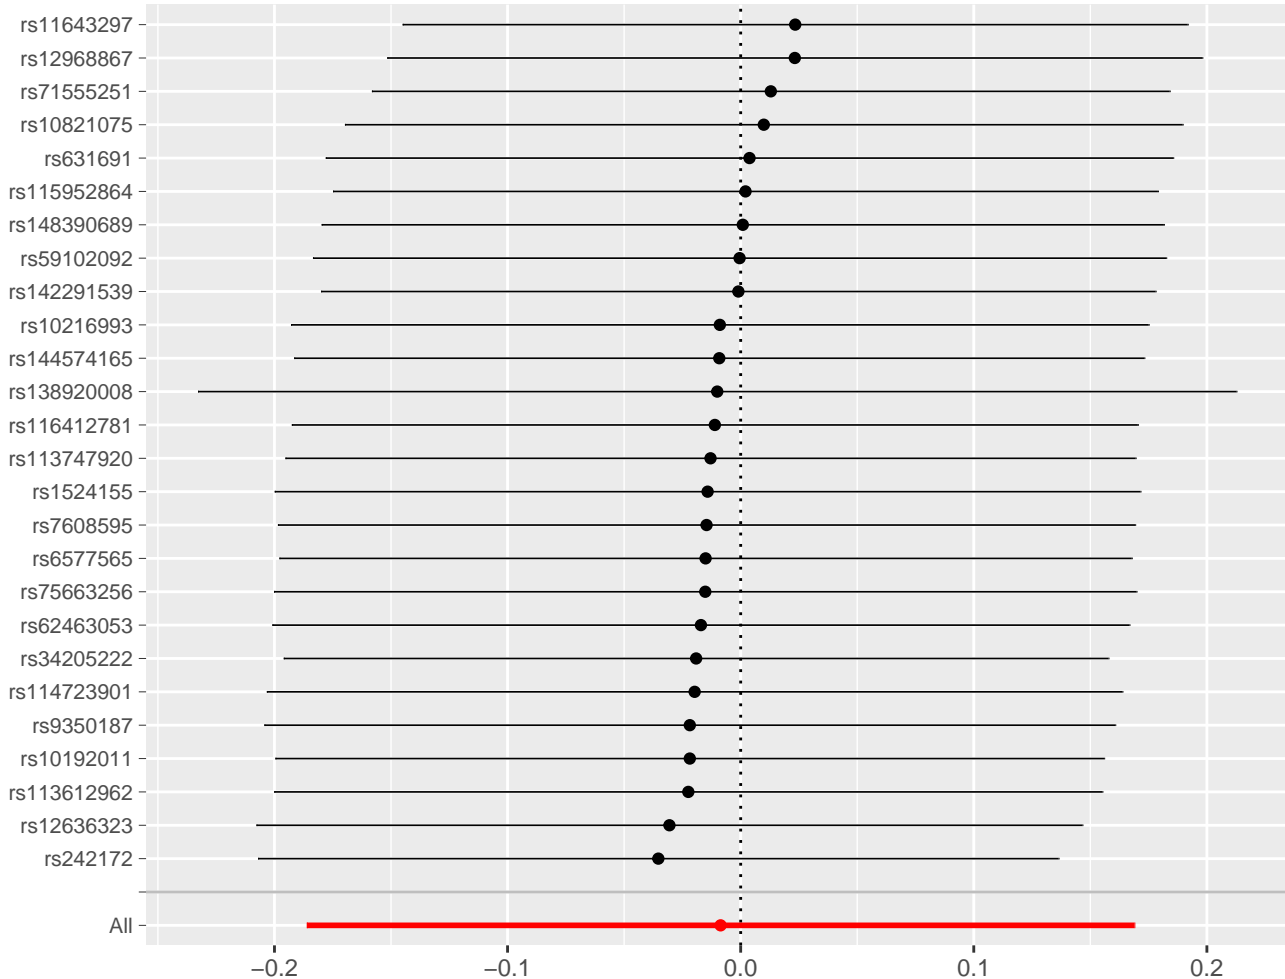

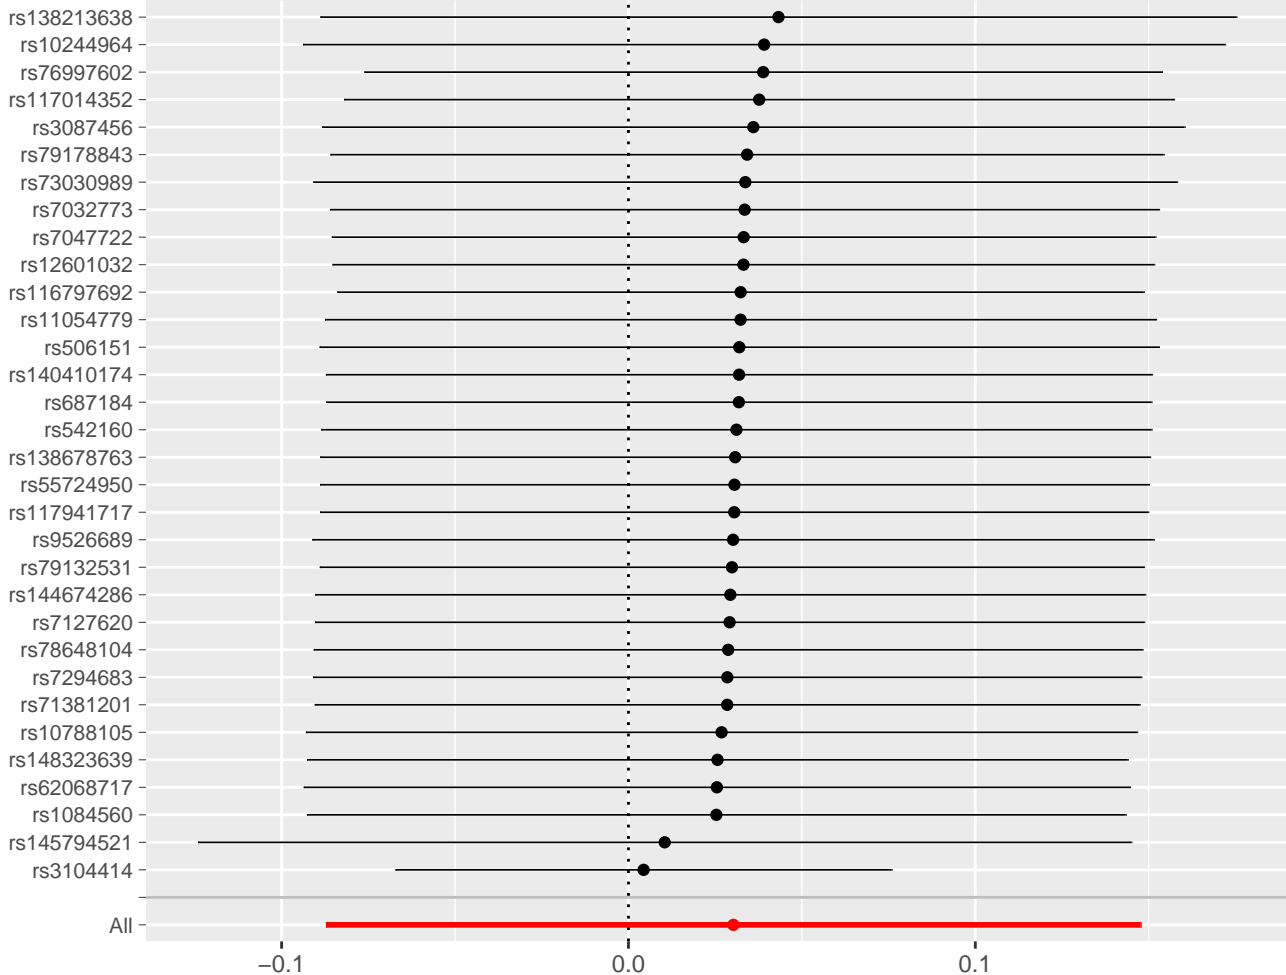

MR leave-one-out sensitivity analysis for 'HLA DR+ T cell%T cell' on 'Juvenile arthritis'

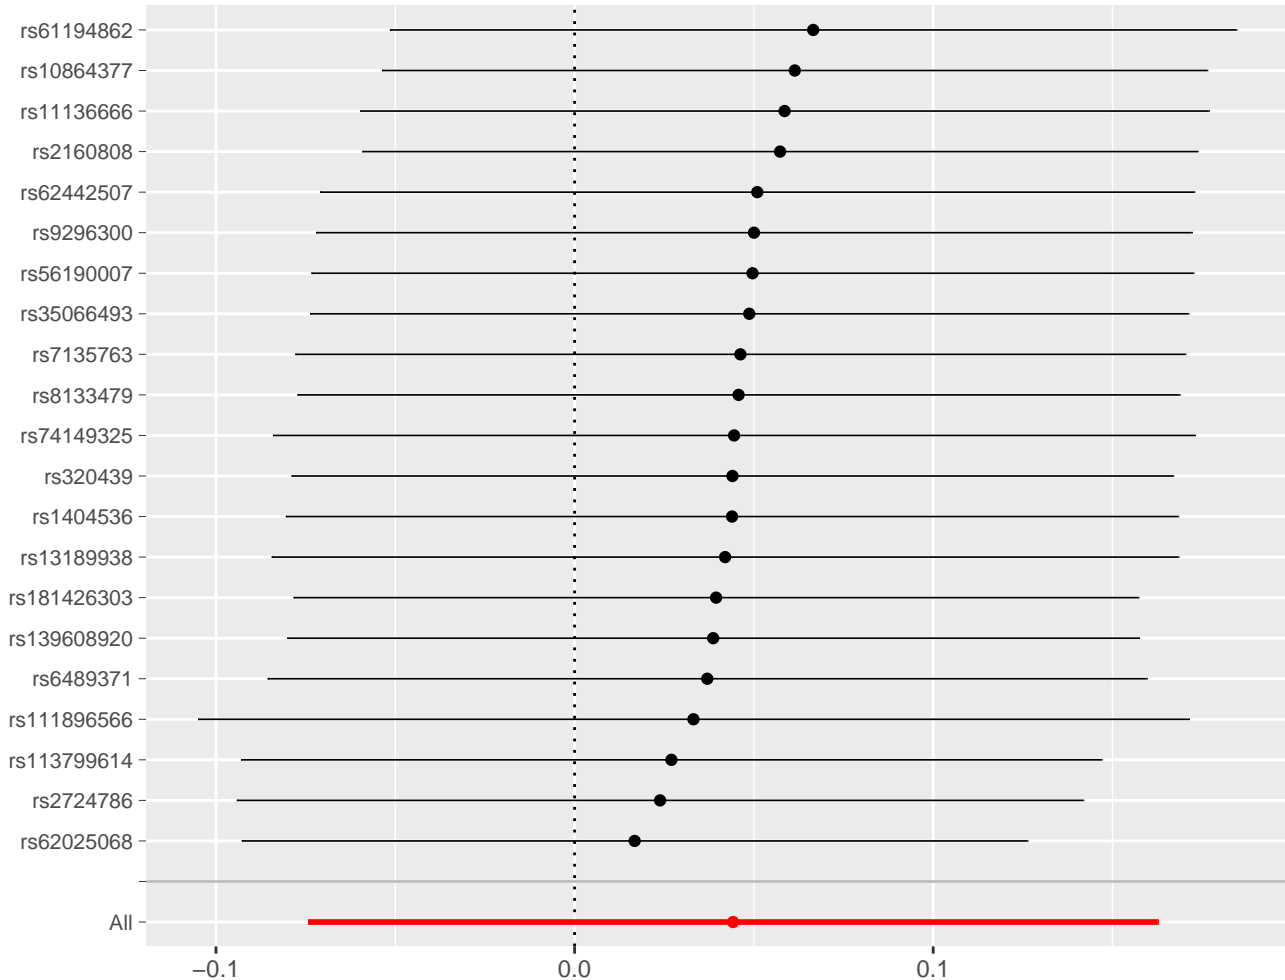

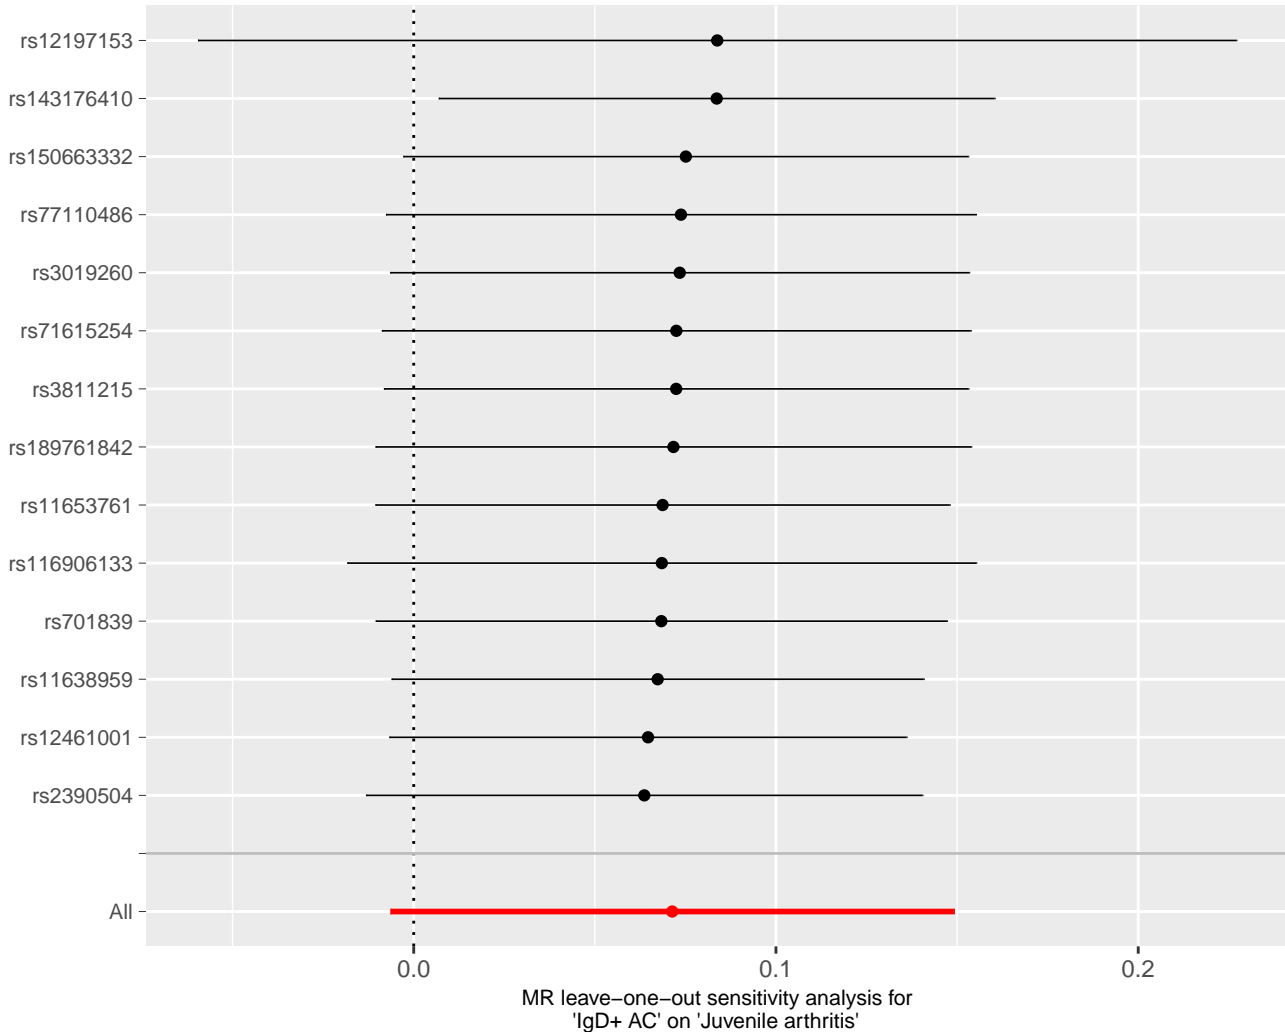

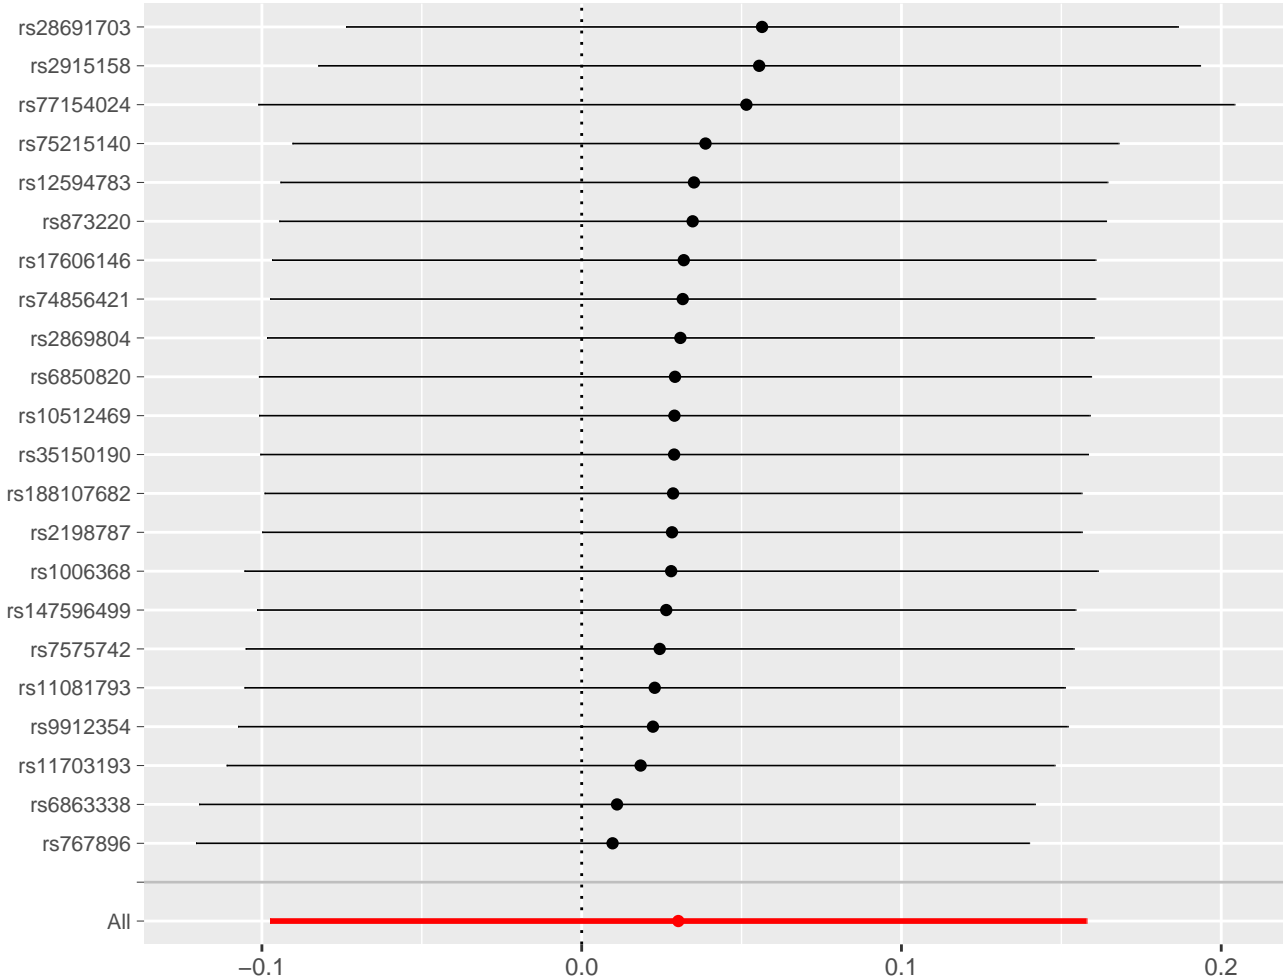

MR leave-one-out sensitivity analysis for 'SSC-A on NK' on 'Juvenile arthritis'

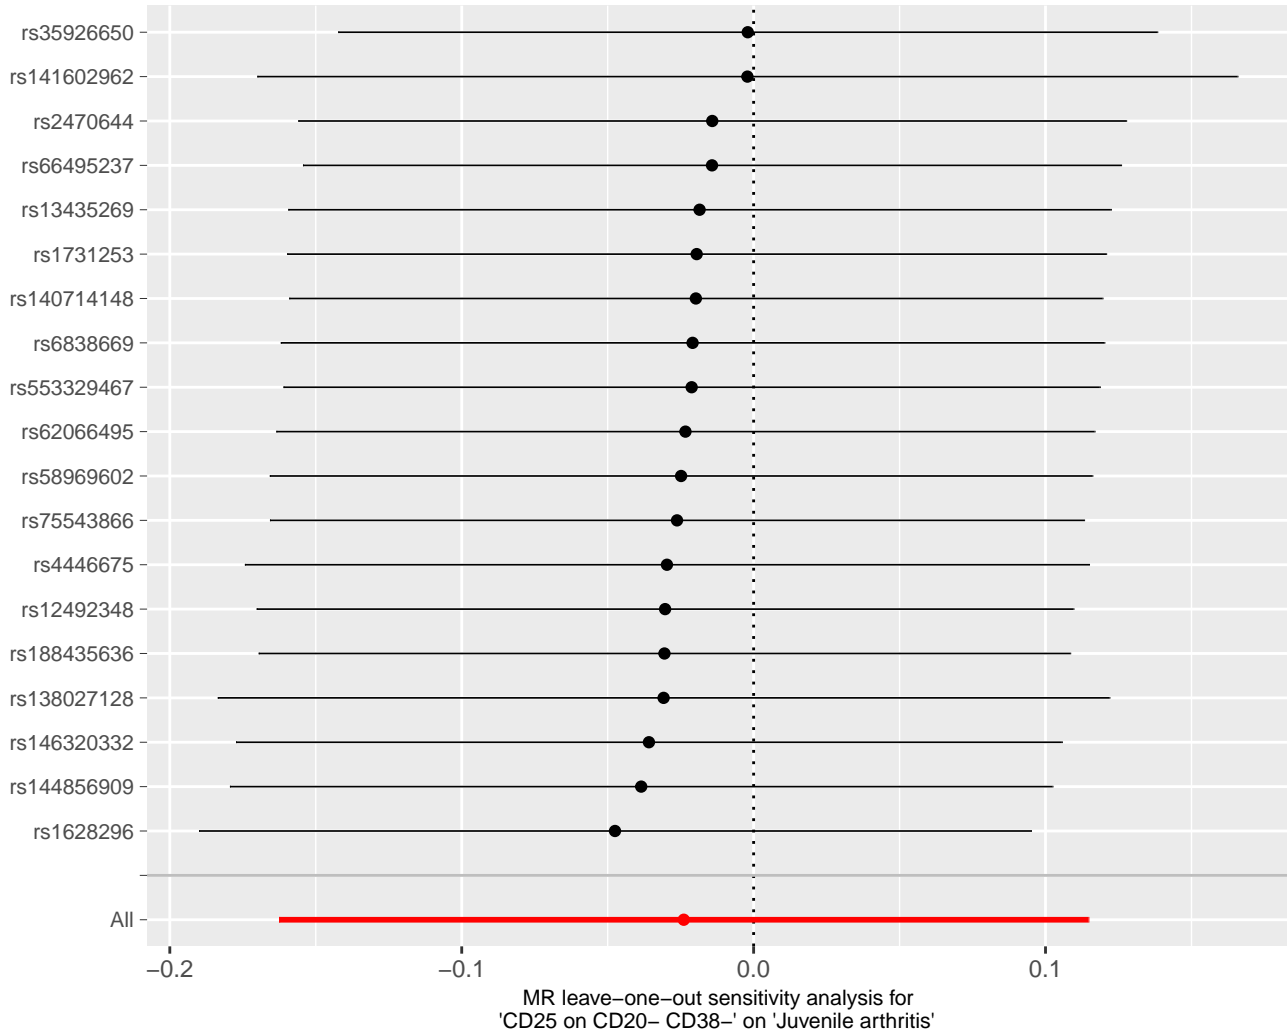

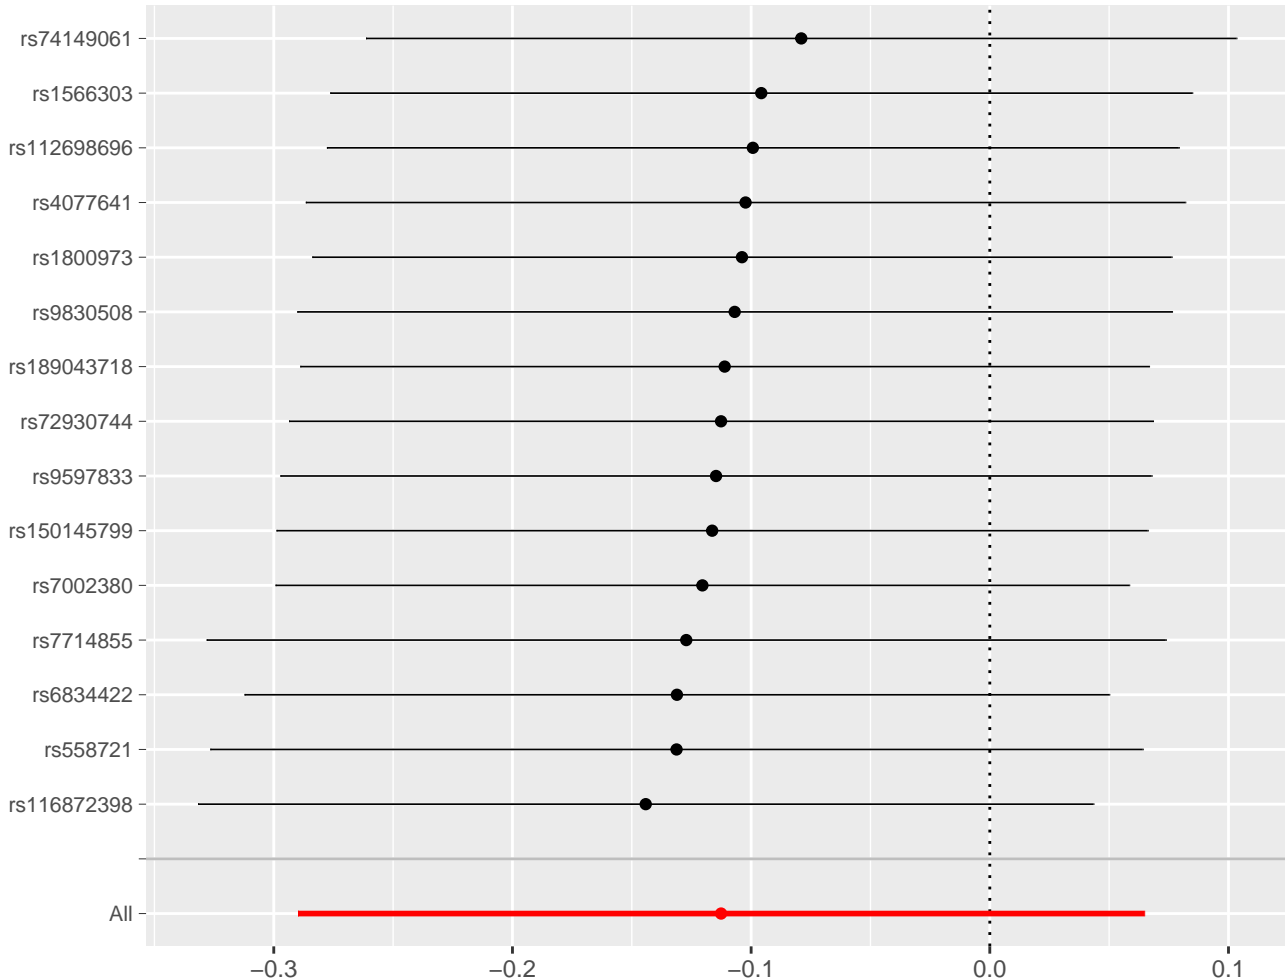

MR leave-one-out sensitivity analysis for 'CD64 on CD14- CD16-' on 'Juvenile arthritis'



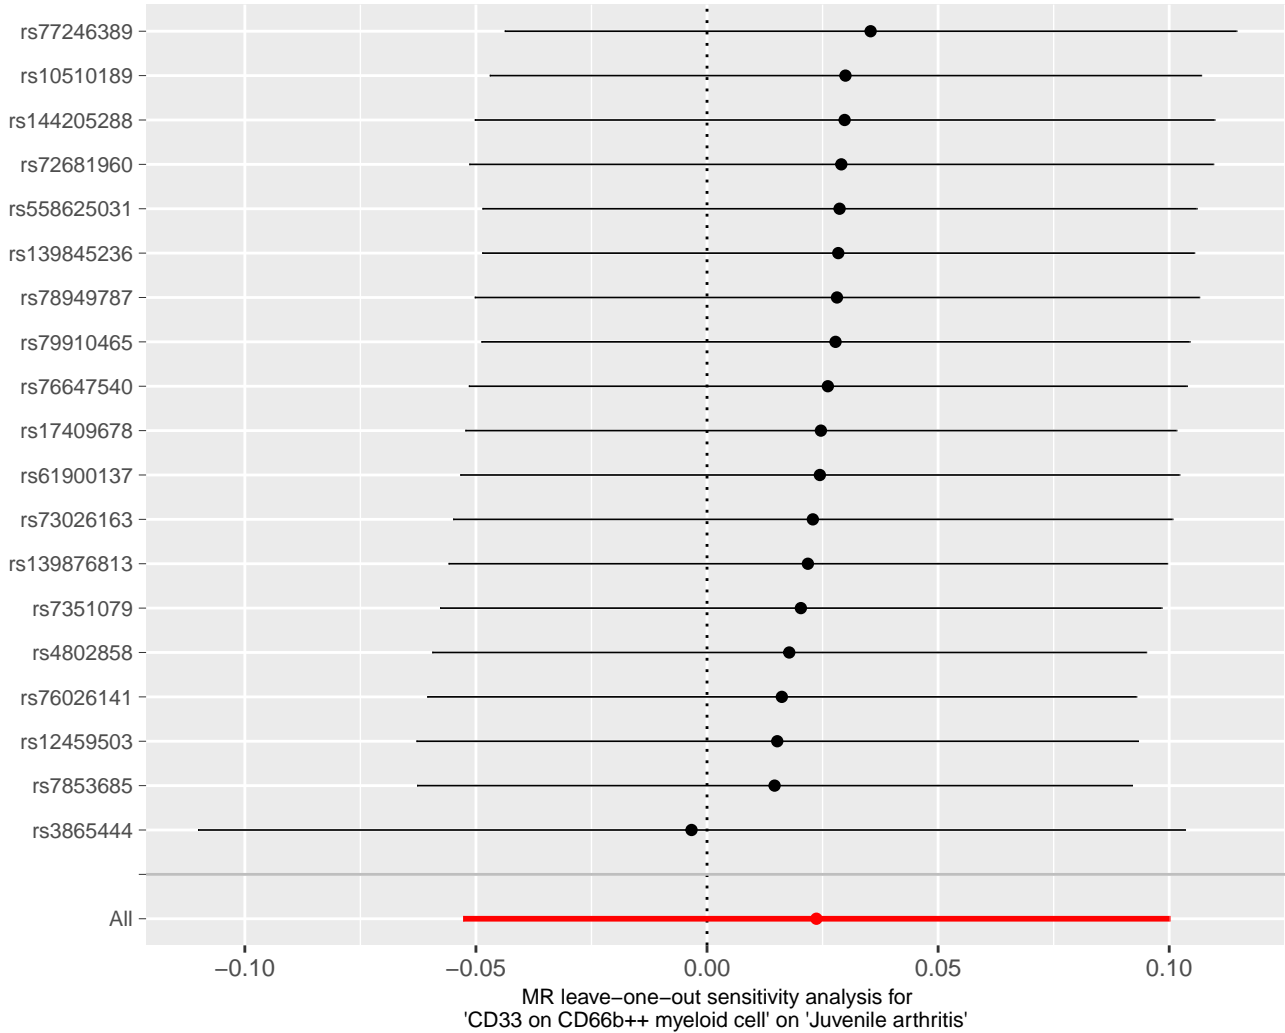

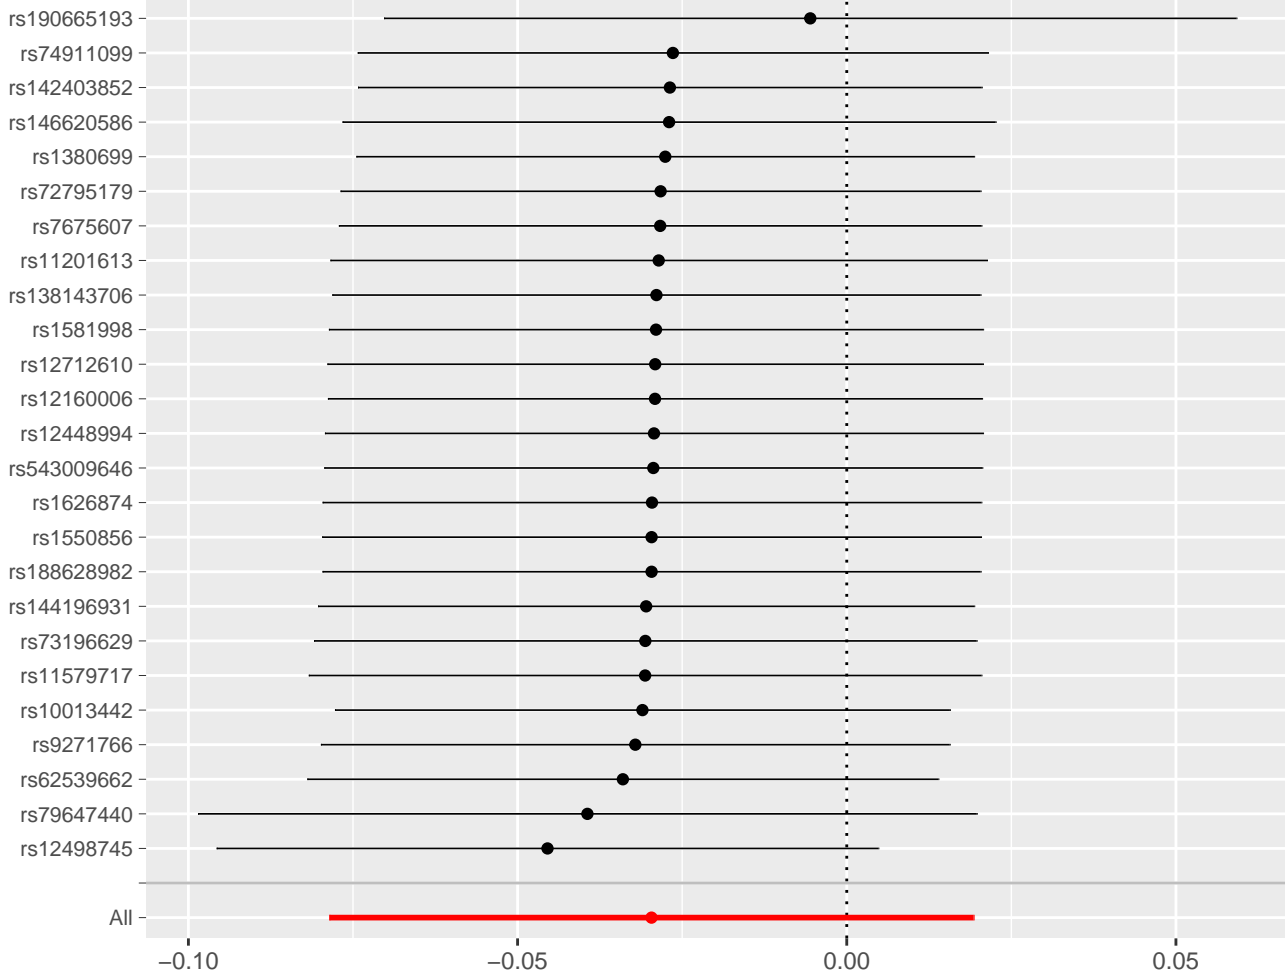

MR leave-one-out sensitivity analysis for 'CD45RA- CD4+ %T cell' on 'Juvenile arthritis'

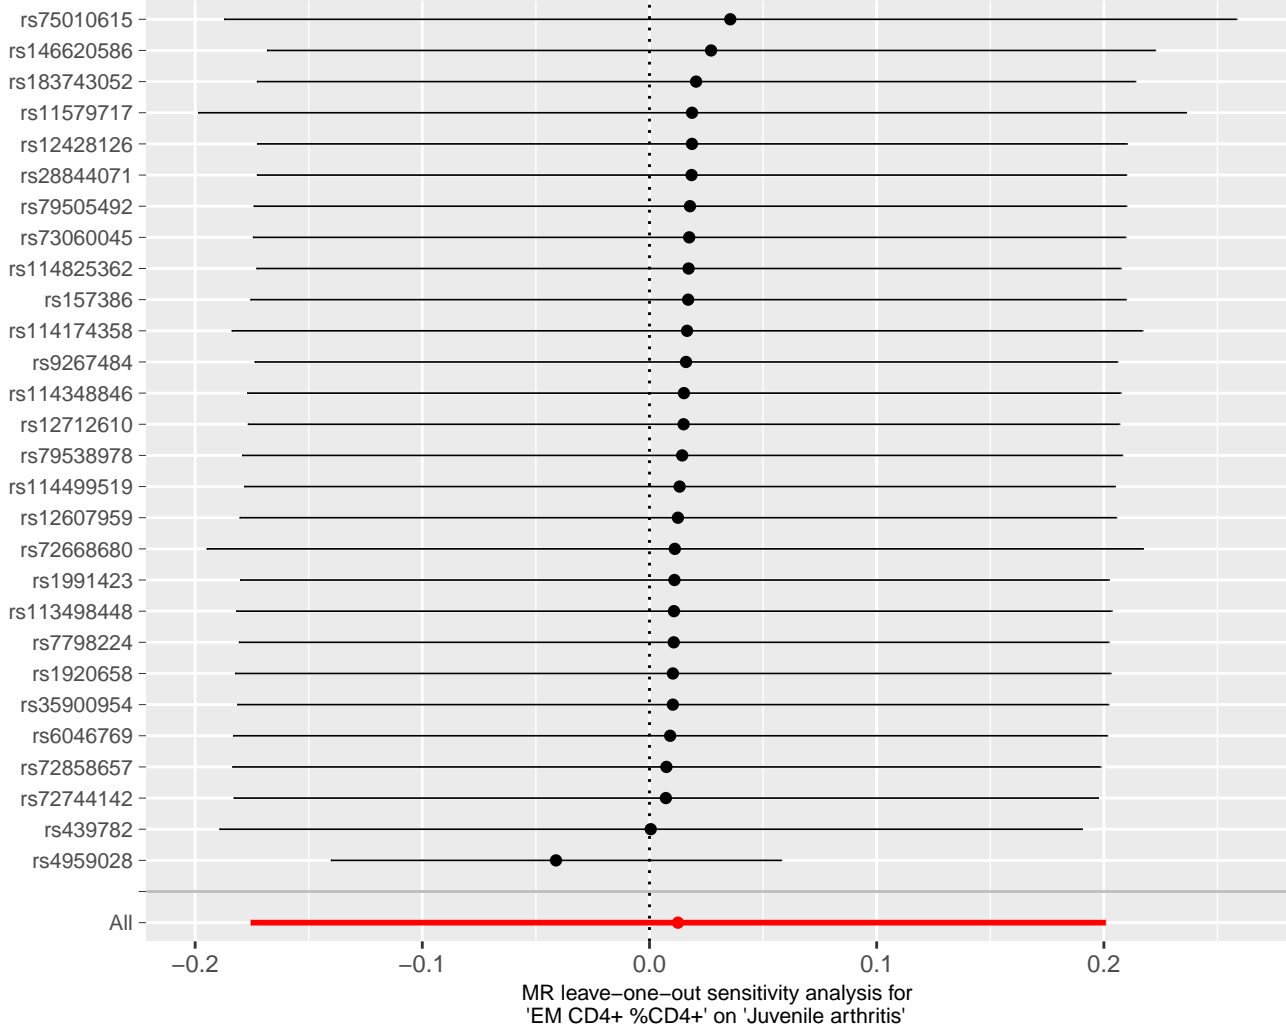

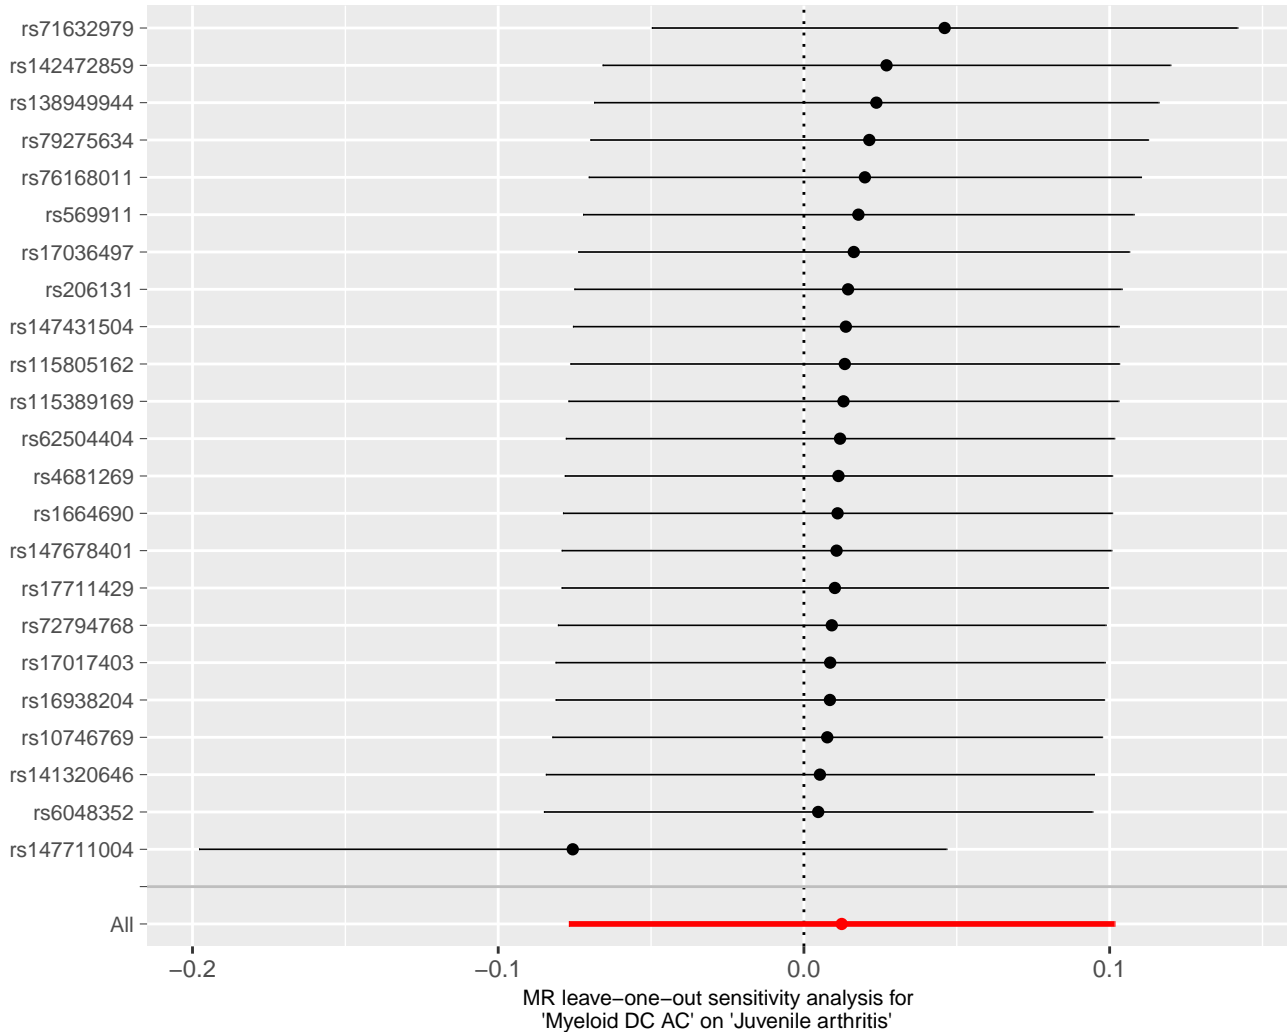

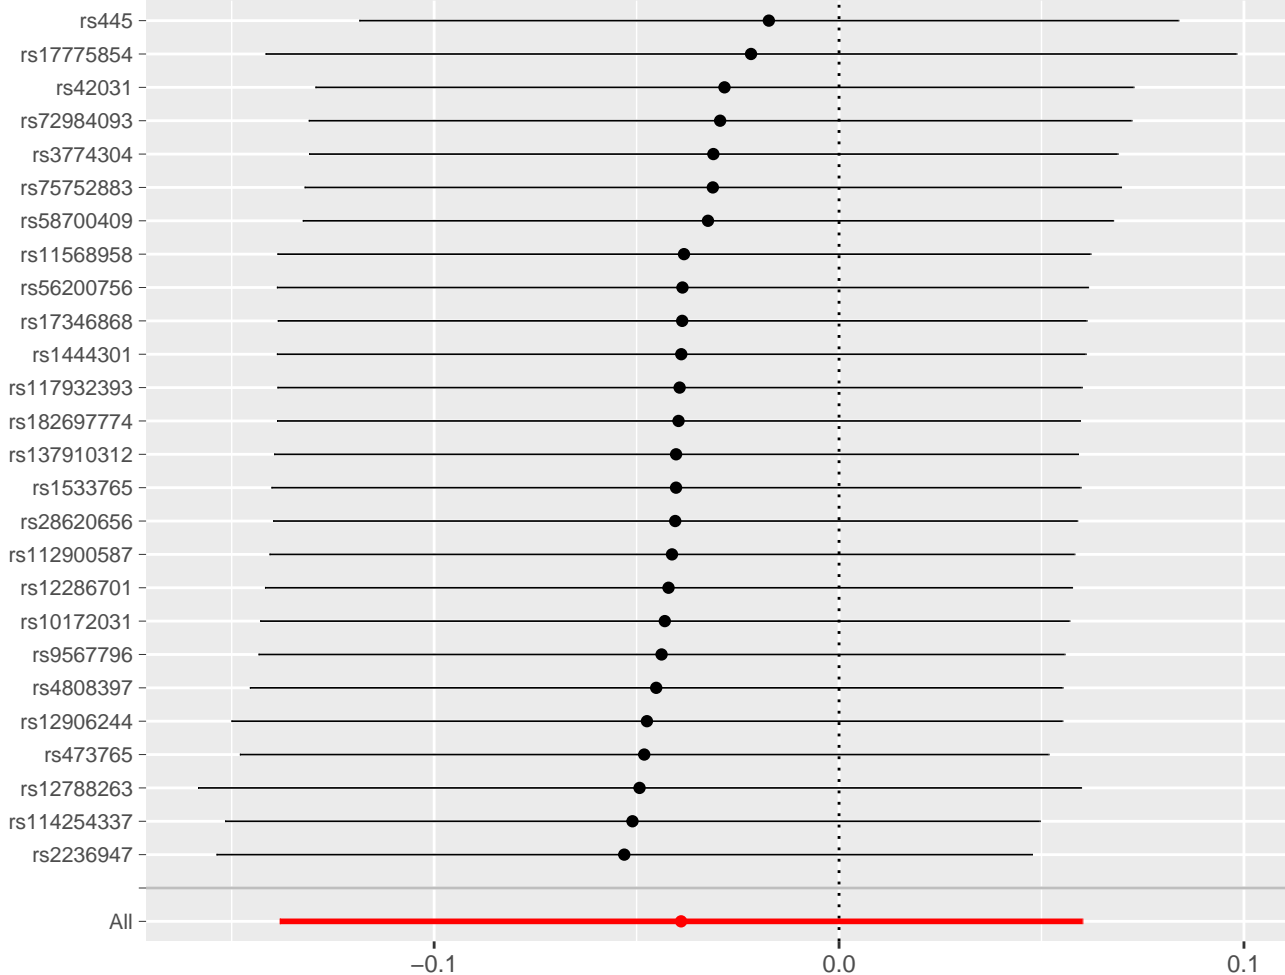

MR leave-one-out sensitivity analysis for 'SSC-A on granulocyte' on 'Juvenile arthritis'

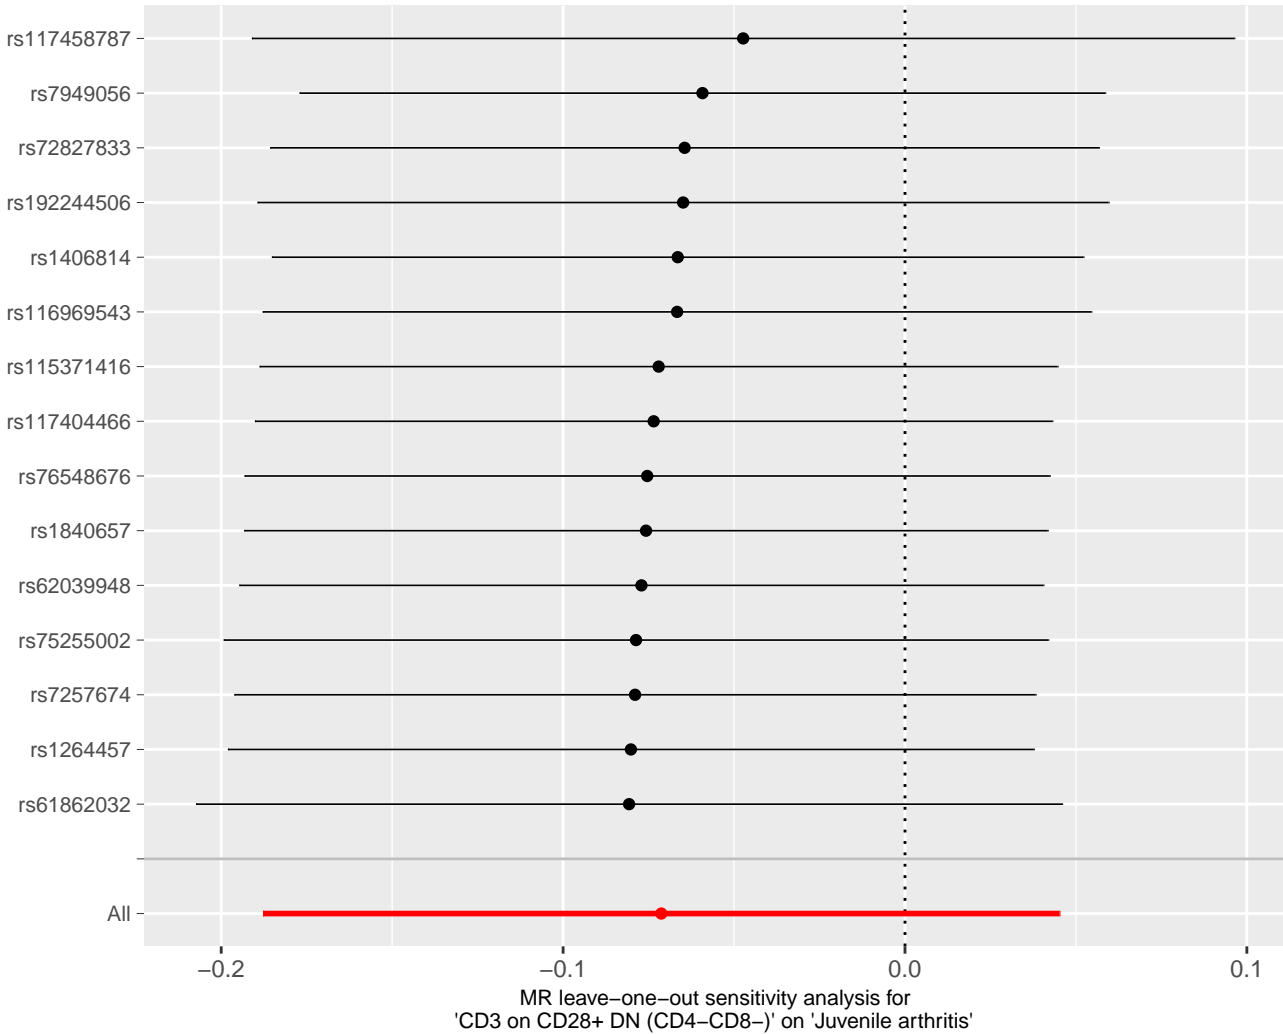

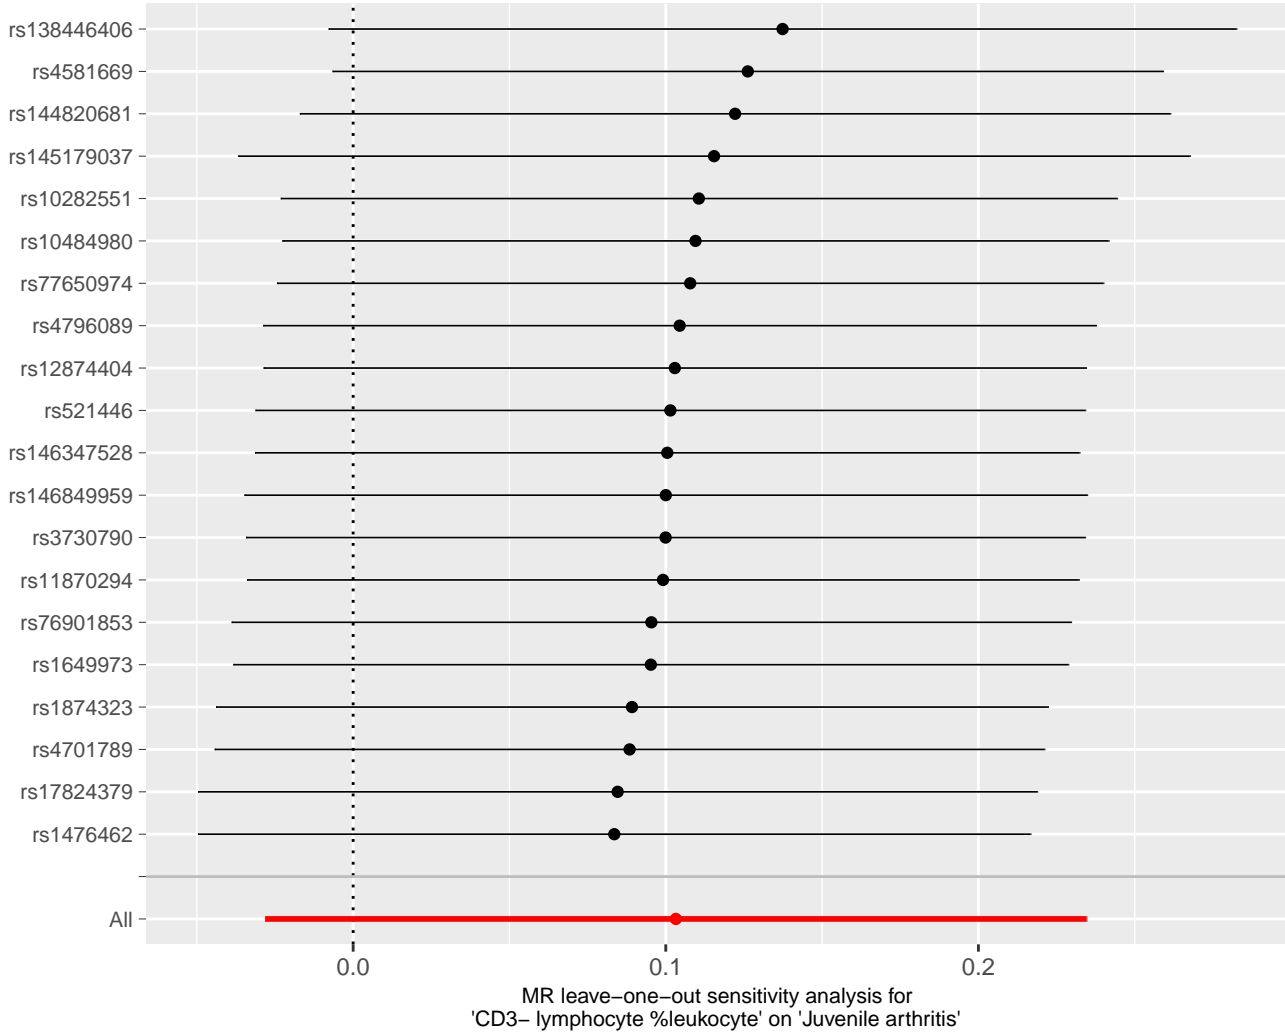

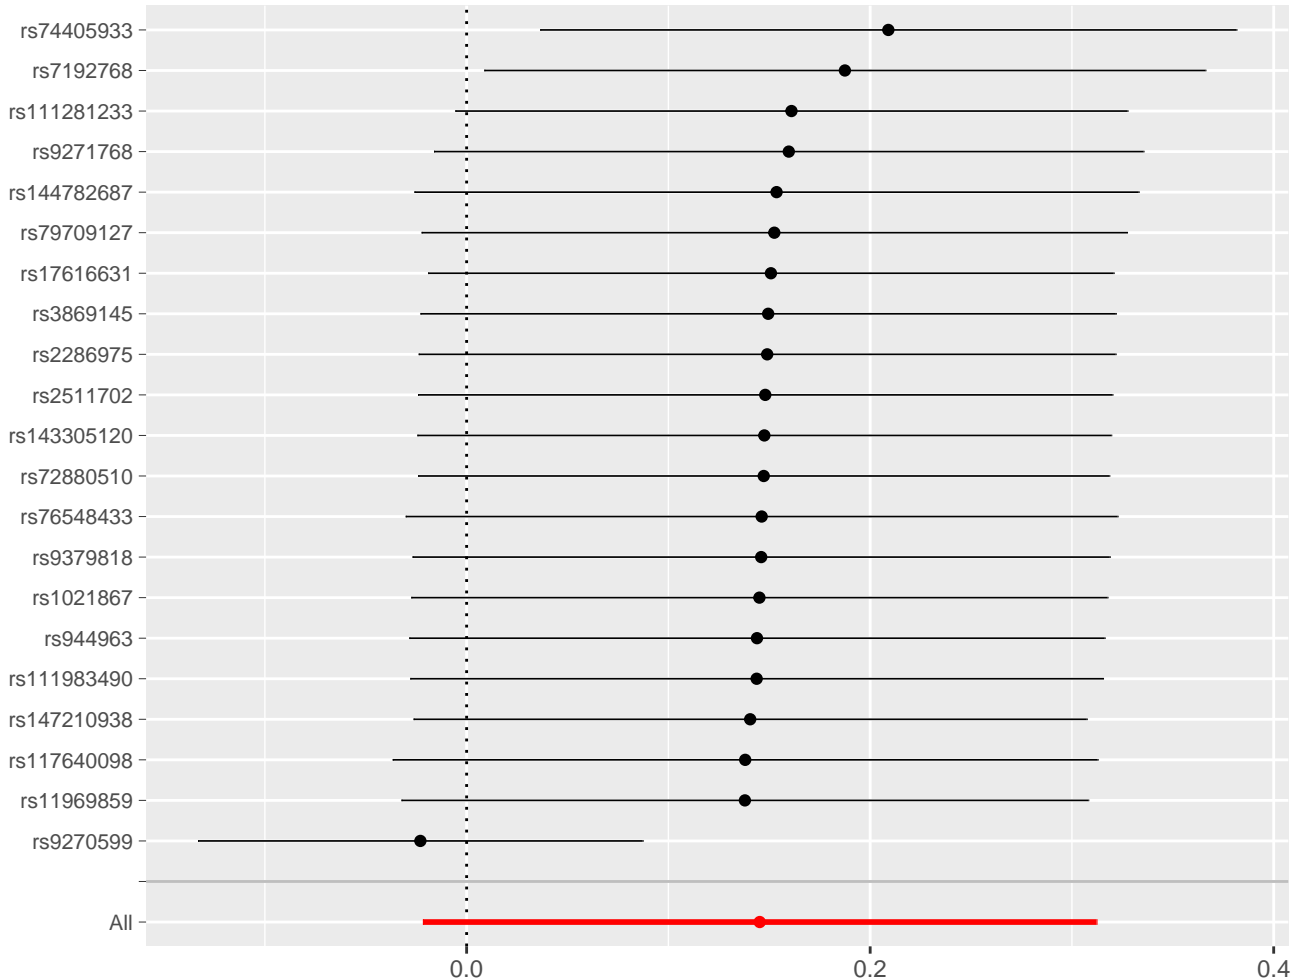



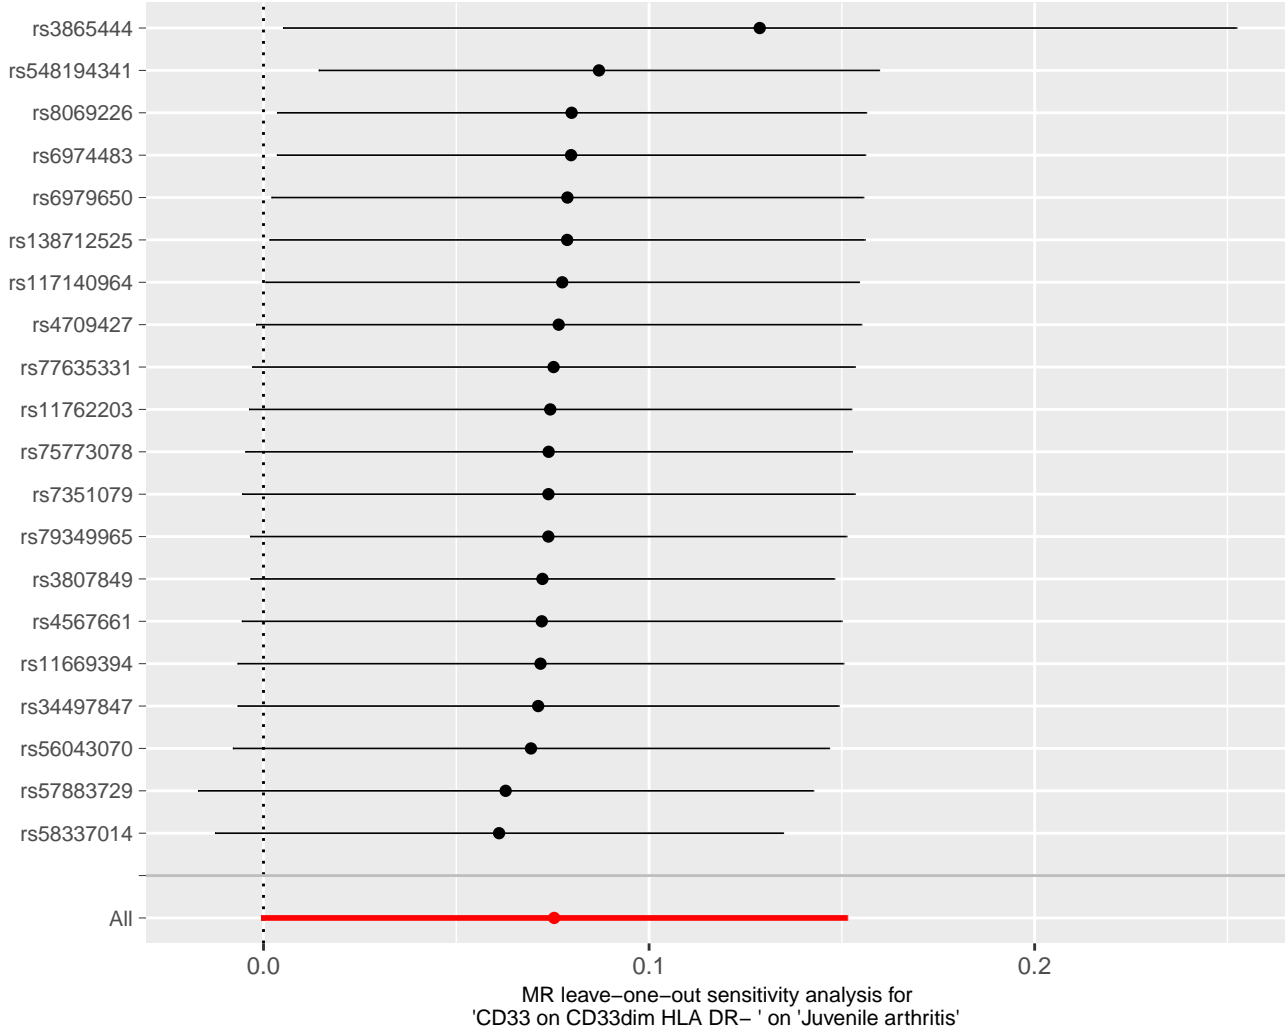

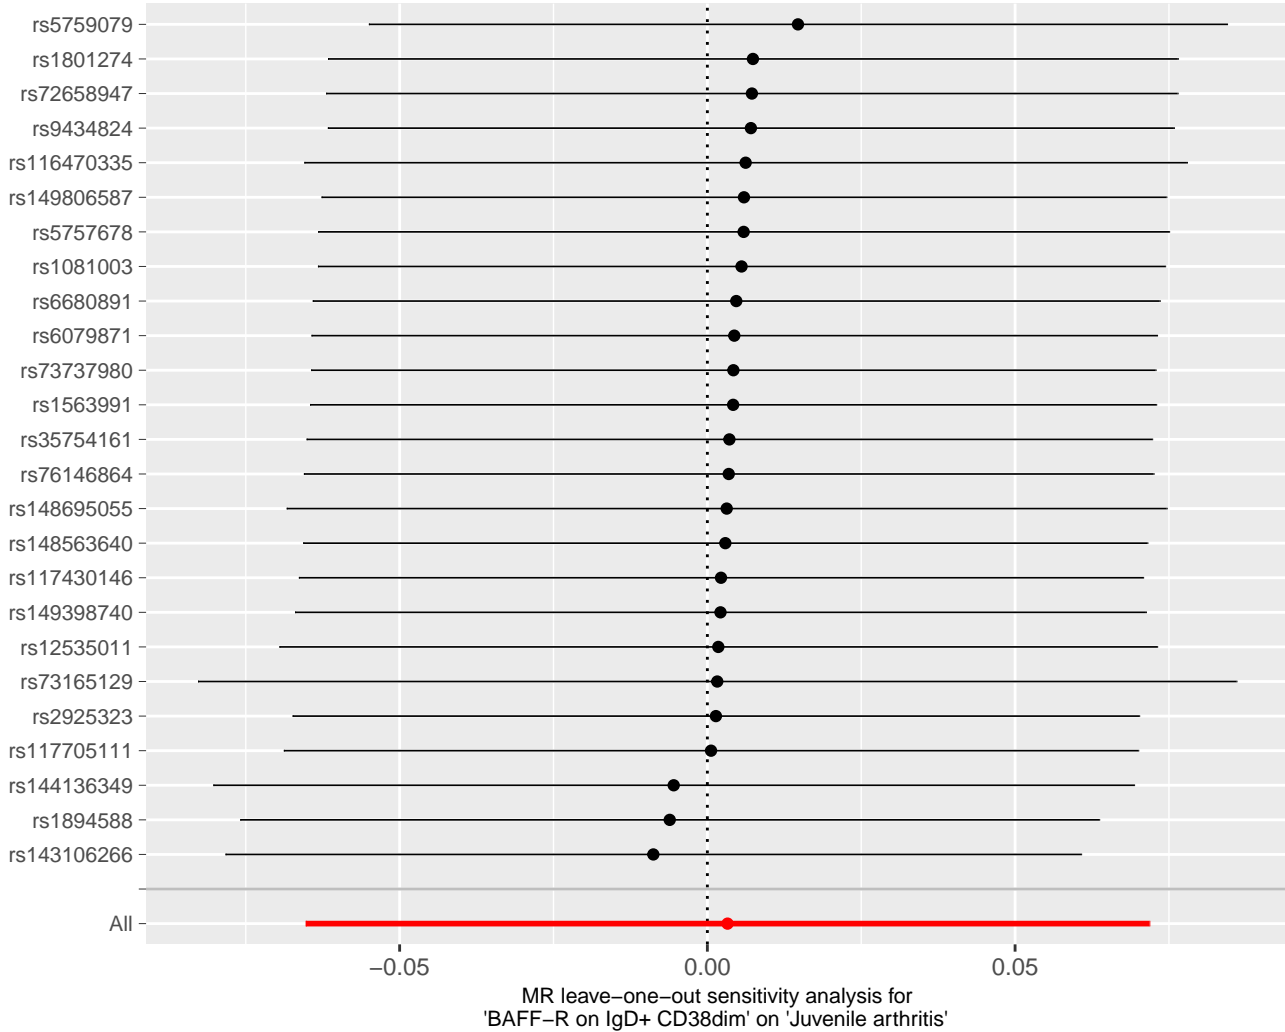

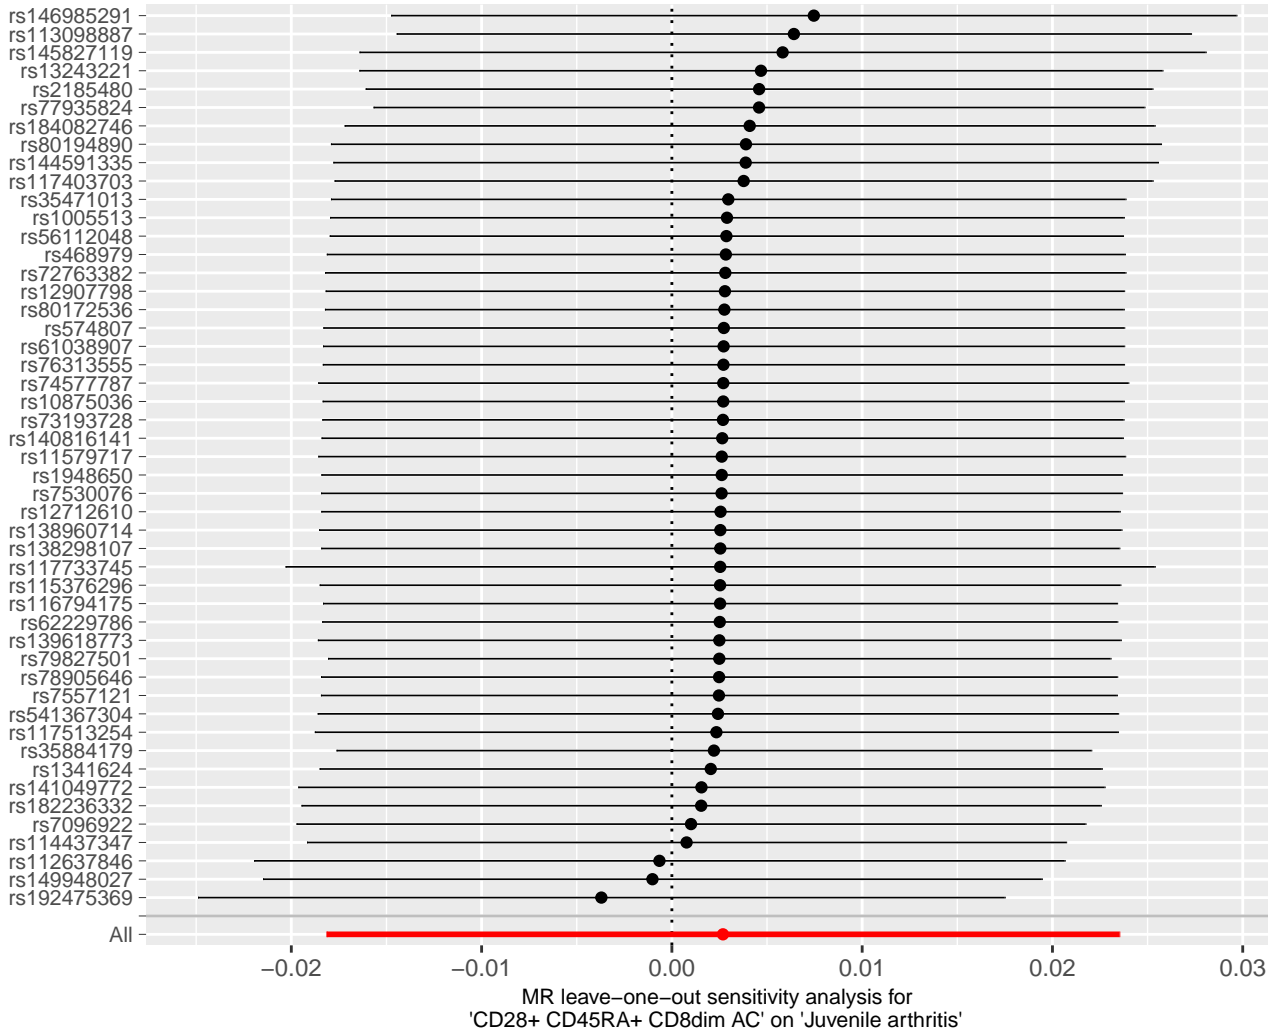

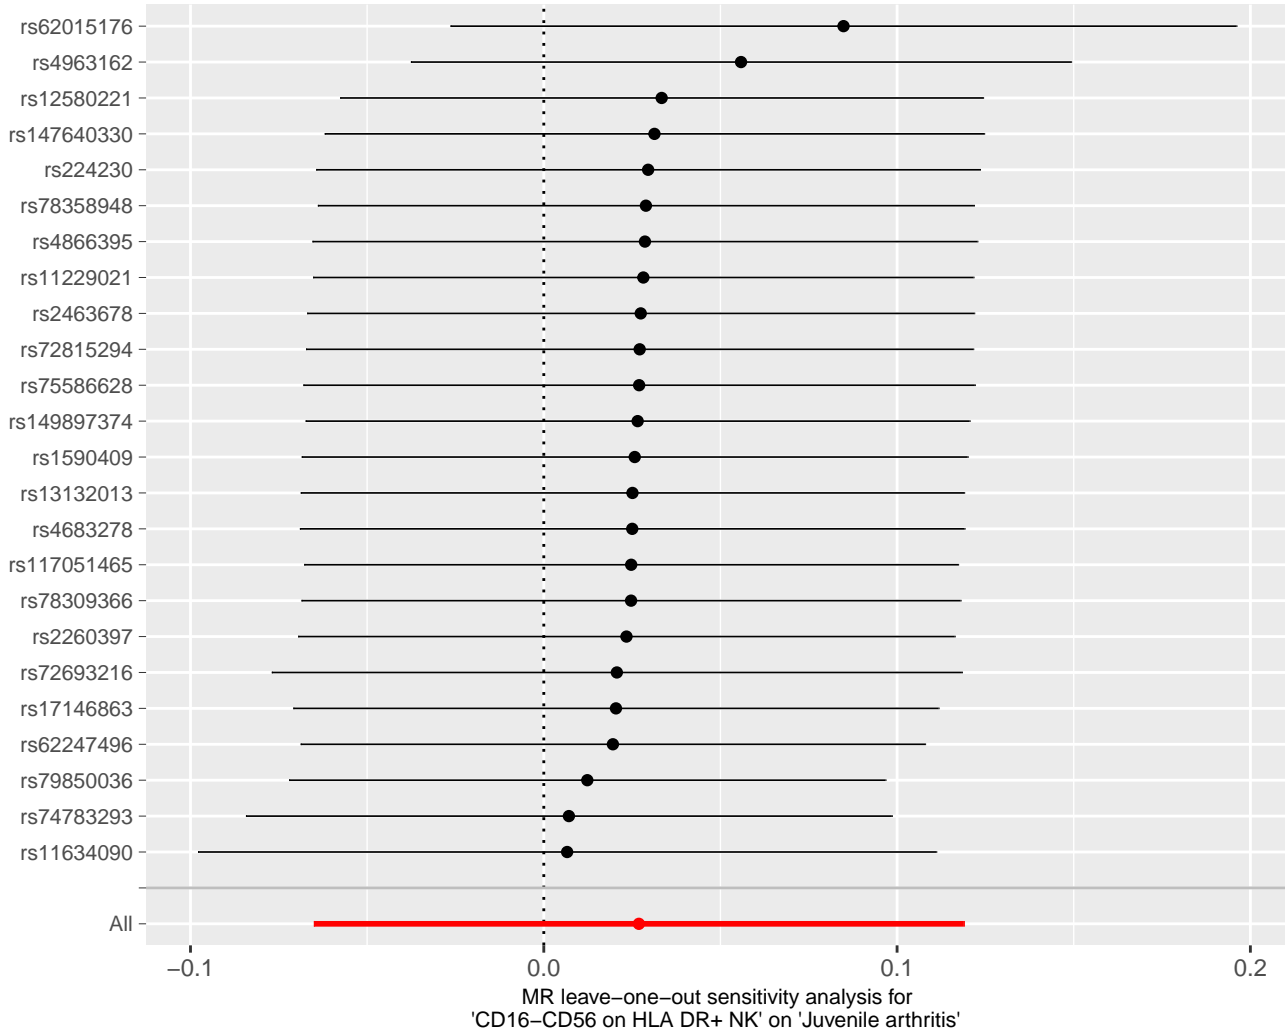

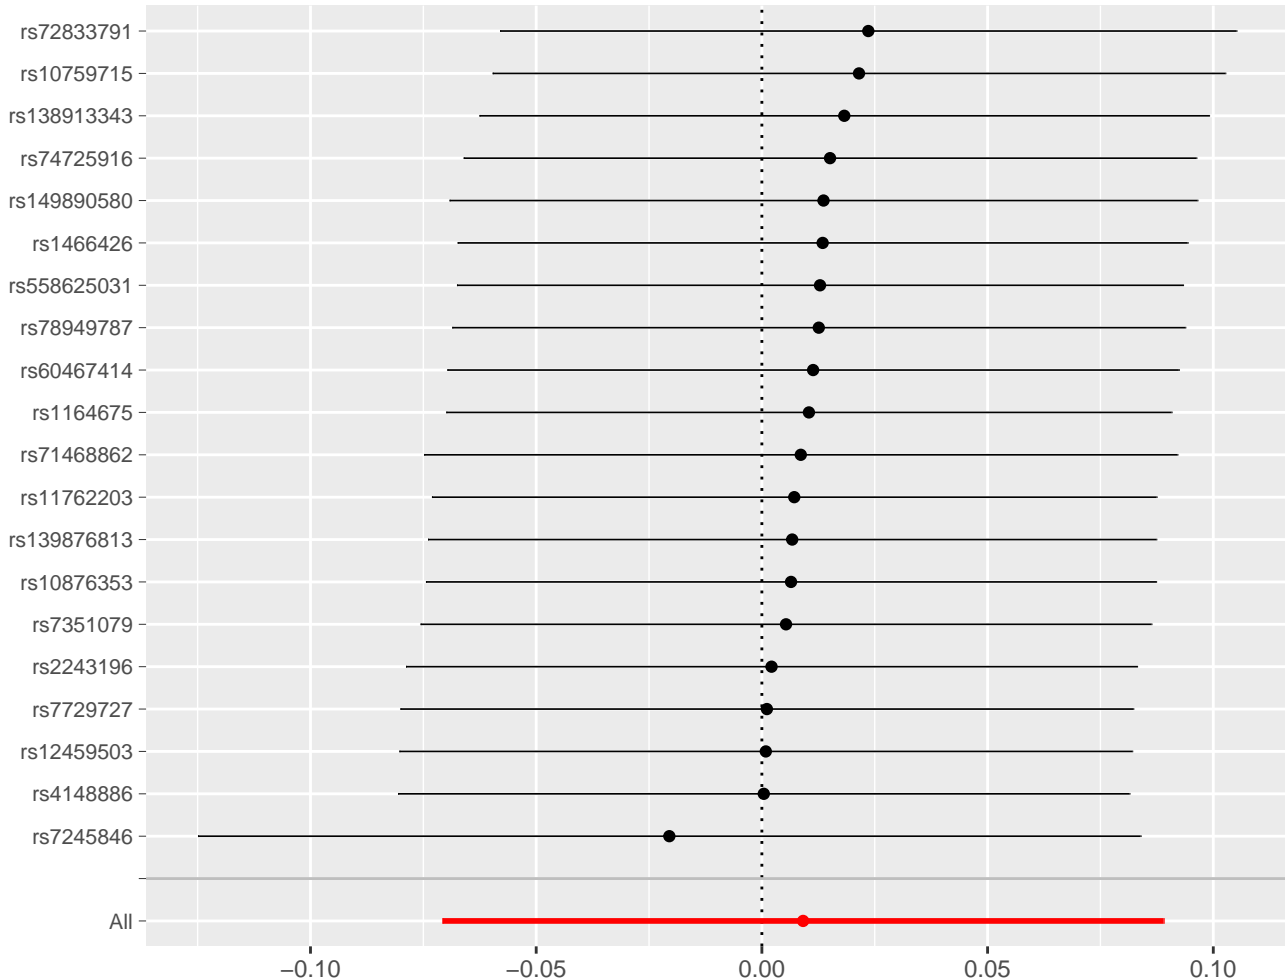

MR leave-one-out sensitivity analysis for 'CD33 on Gr MDSC' on 'Juvenile arthritis'

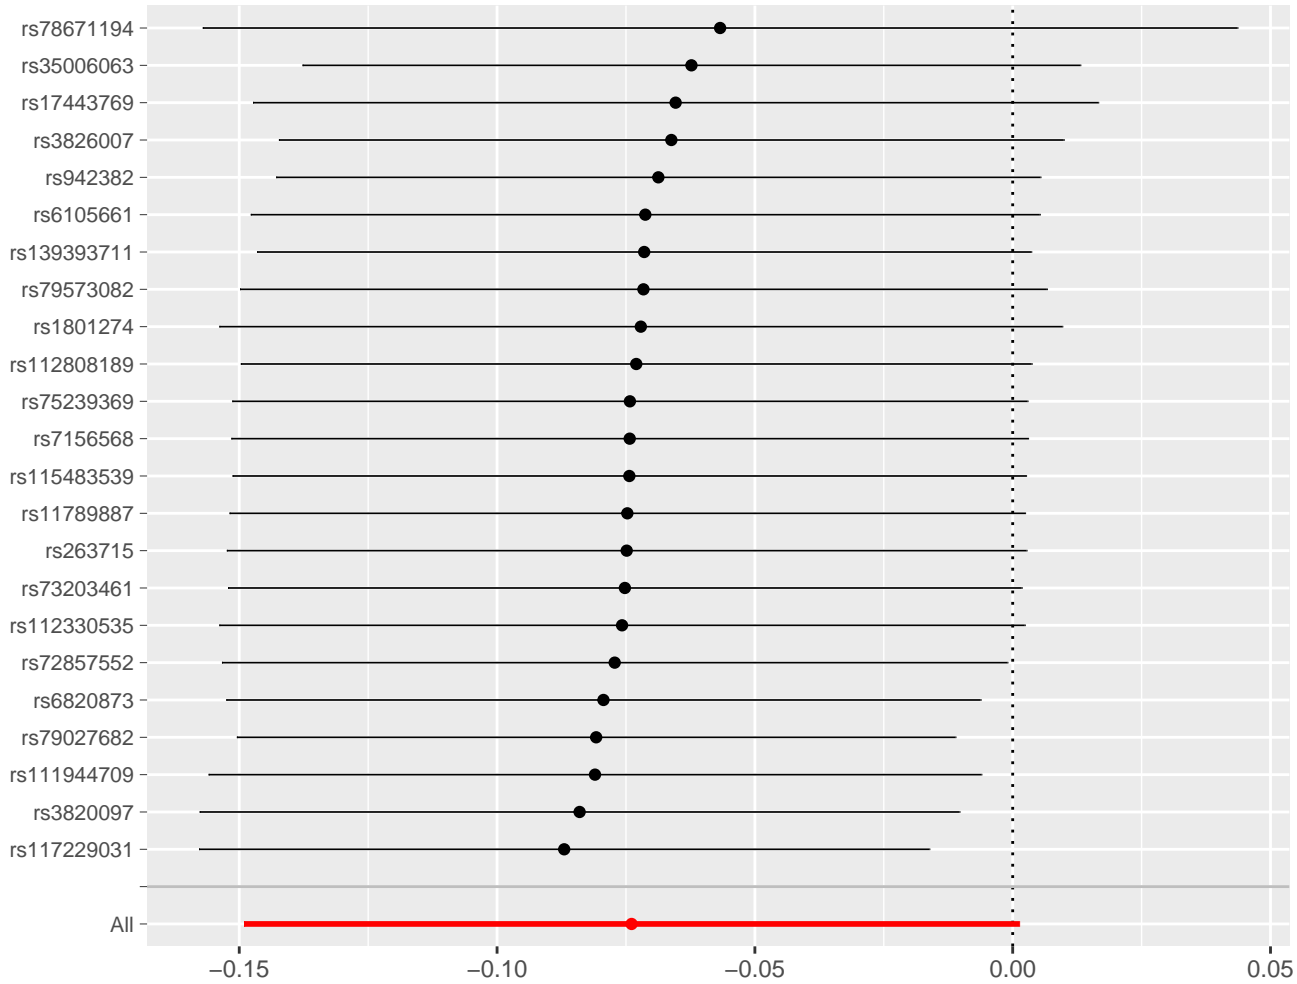

MR leave-one-out sensitivity analysis for 'CD33dim HLA DR+ CD11b- %CD33dim HLA DR+' on 'Juvenile arthritis'

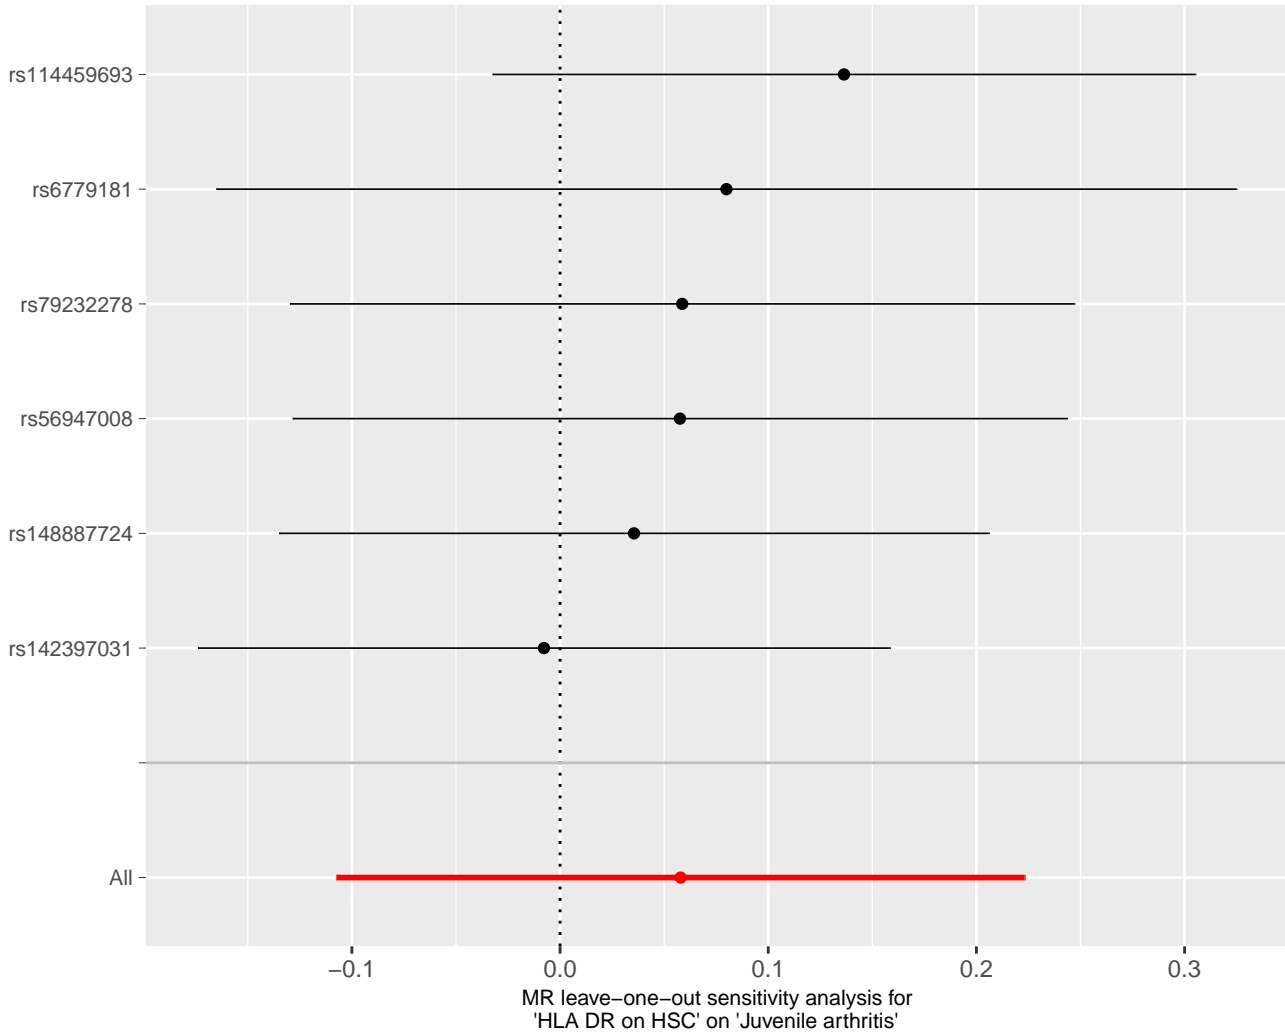

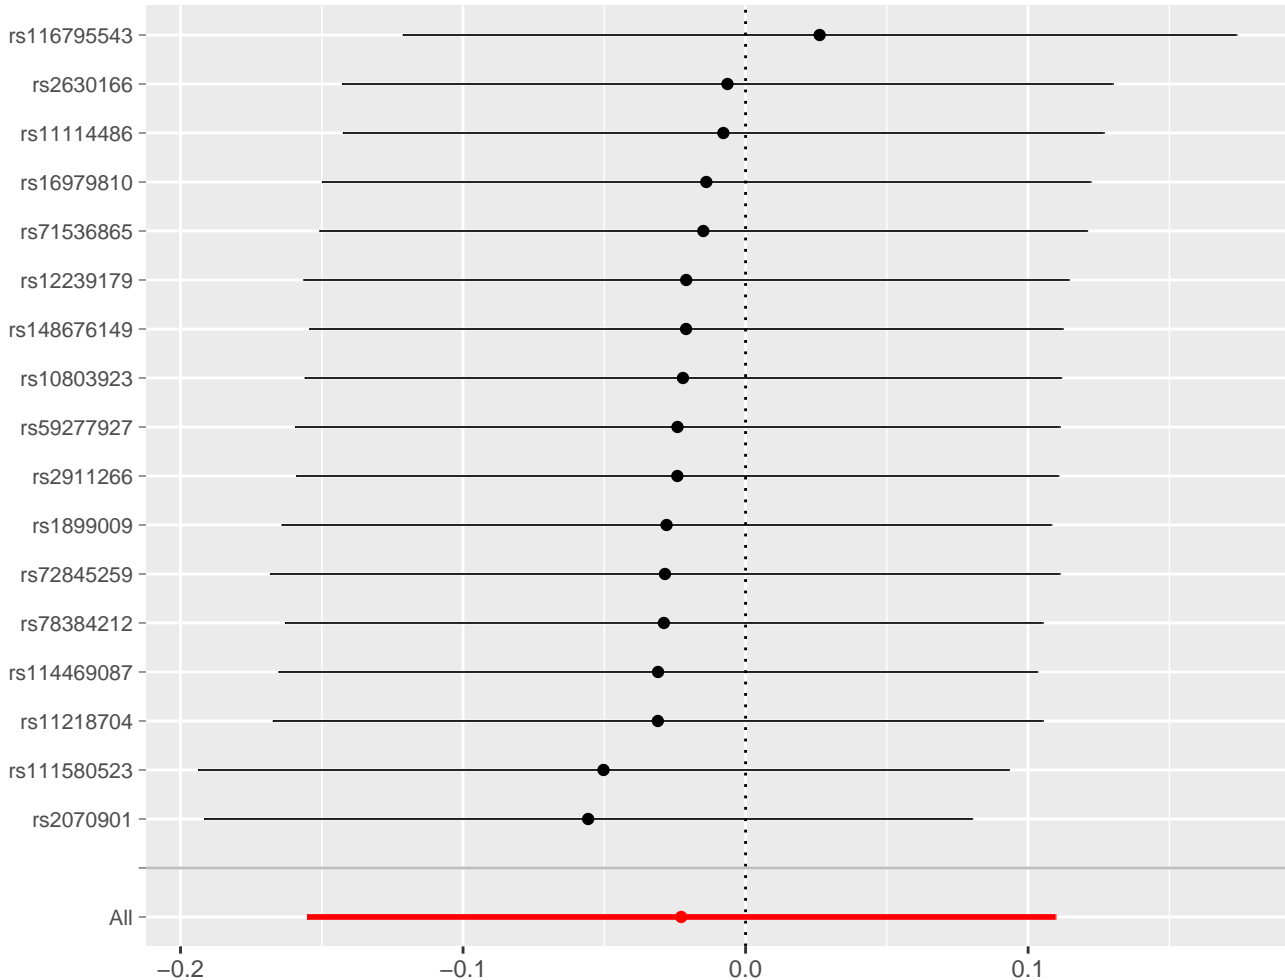



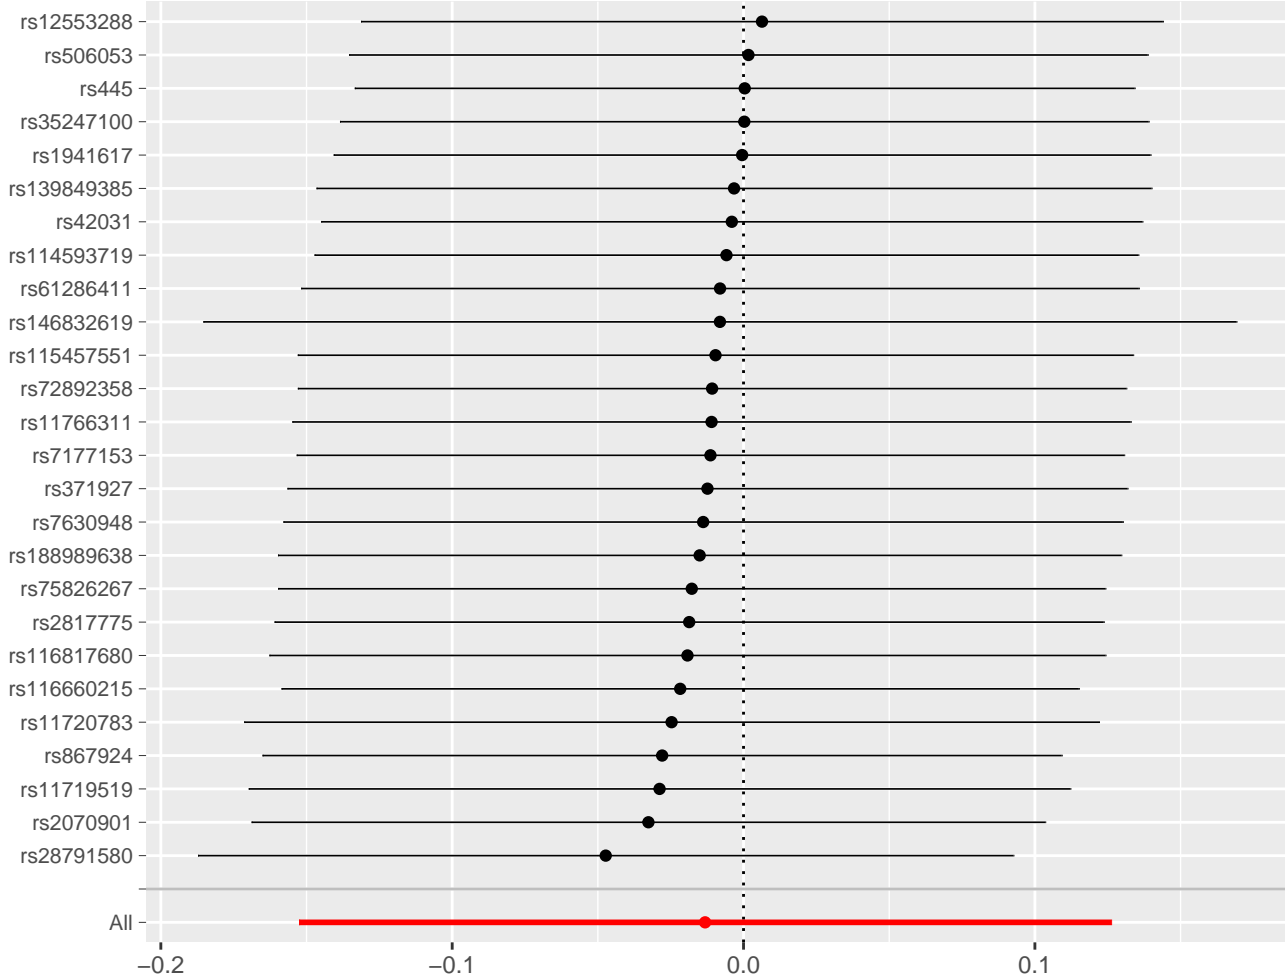

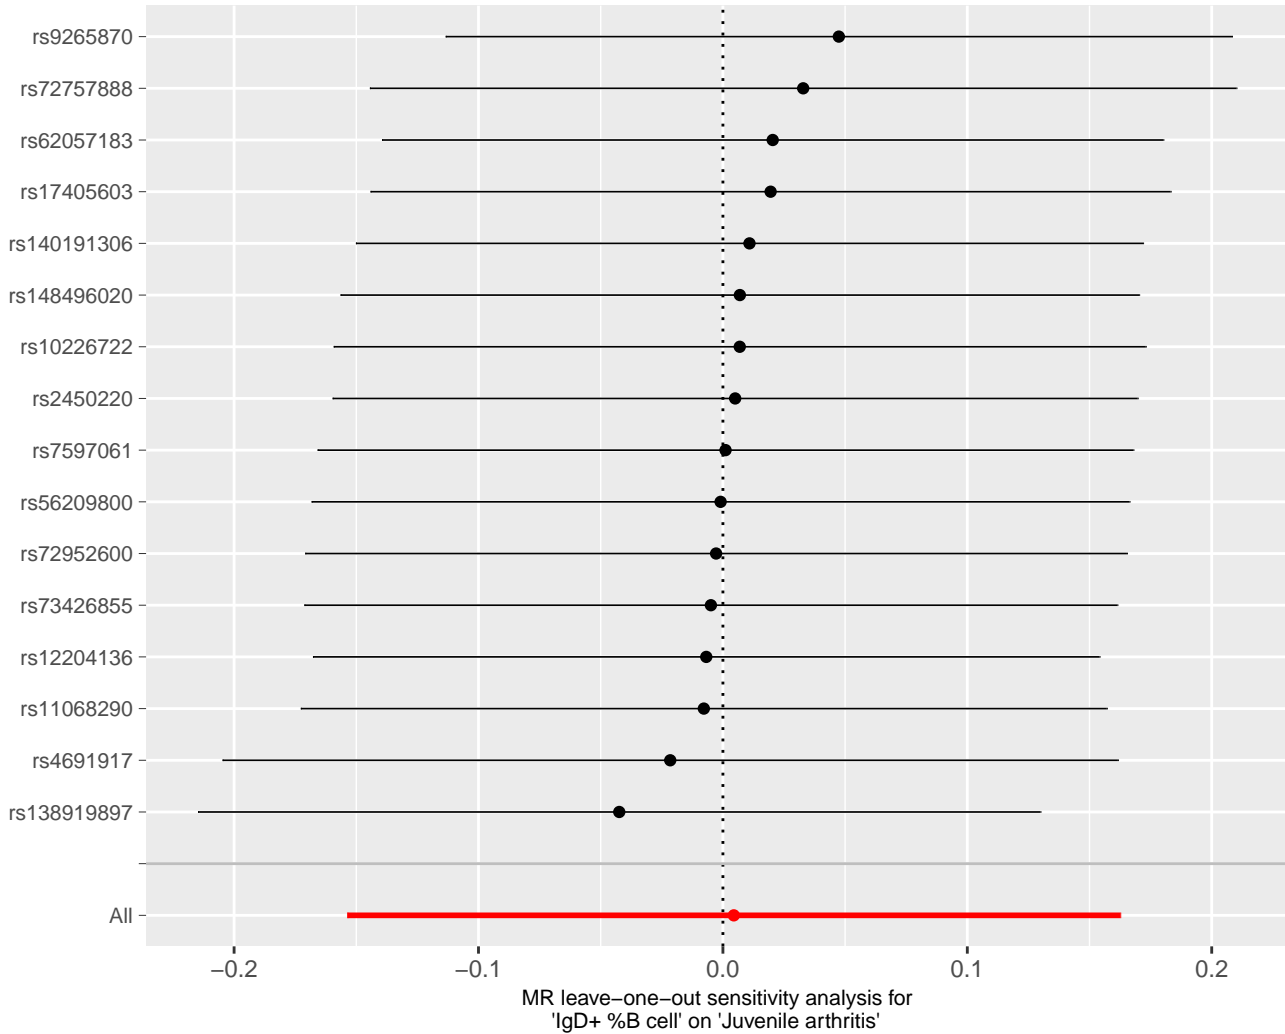

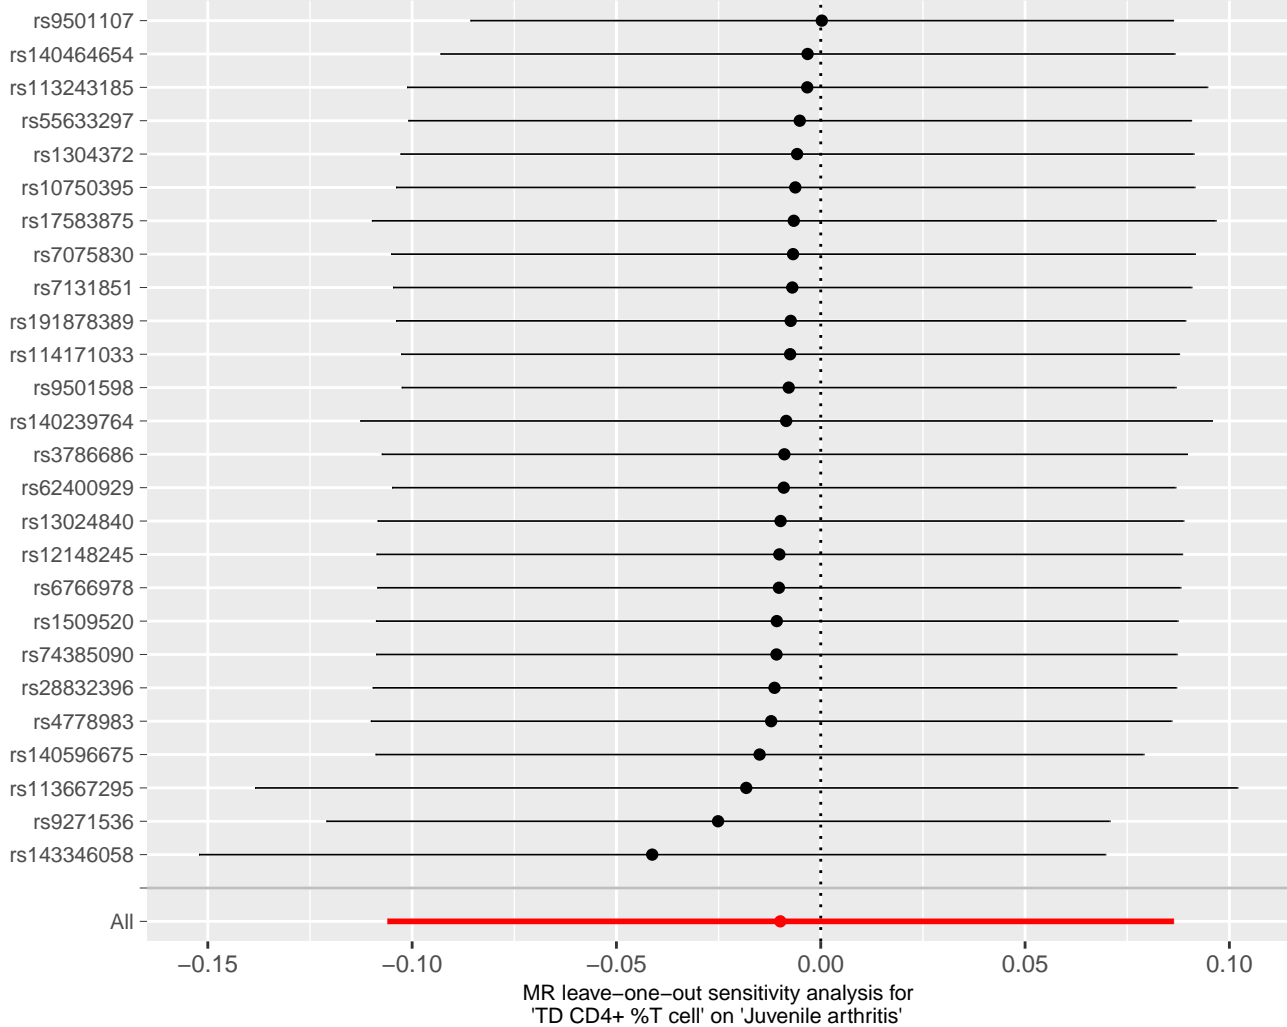

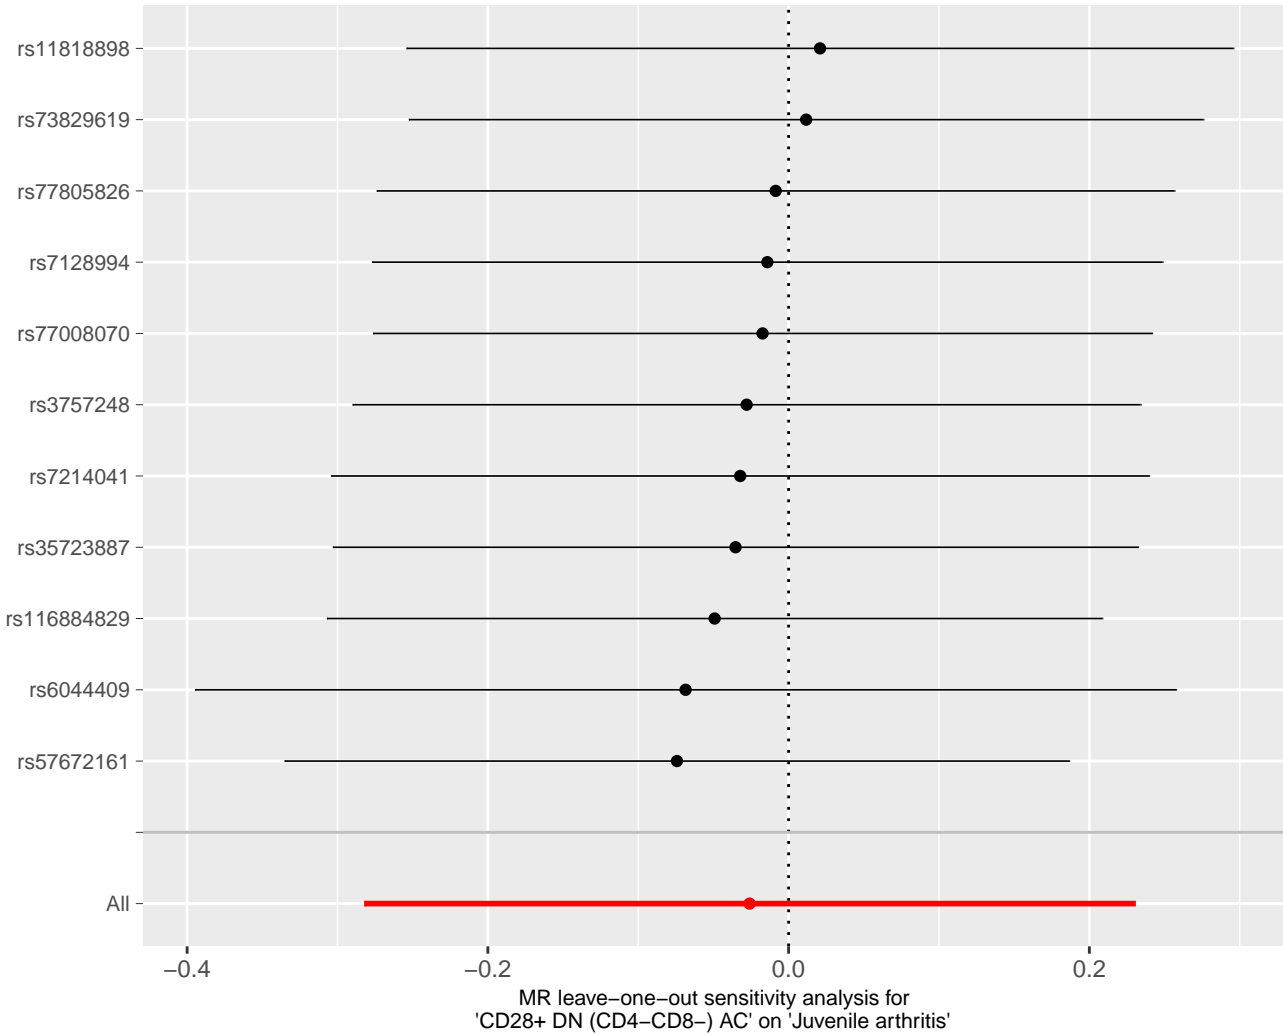

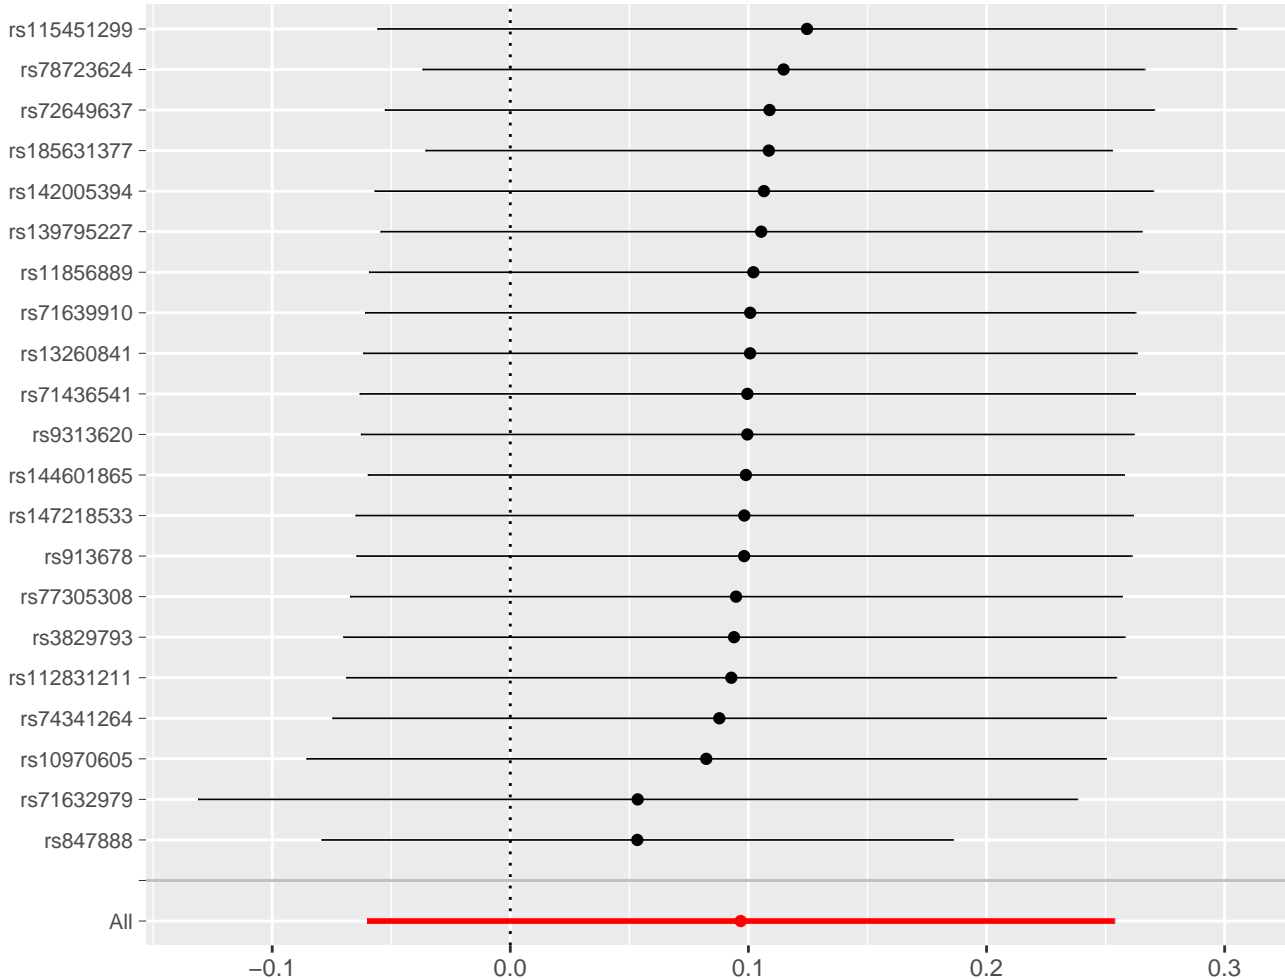

MR leave-one-out sensitivity analysis for 'CD14+ CD16+ monocyte AC' on 'Juvenile arthritis'

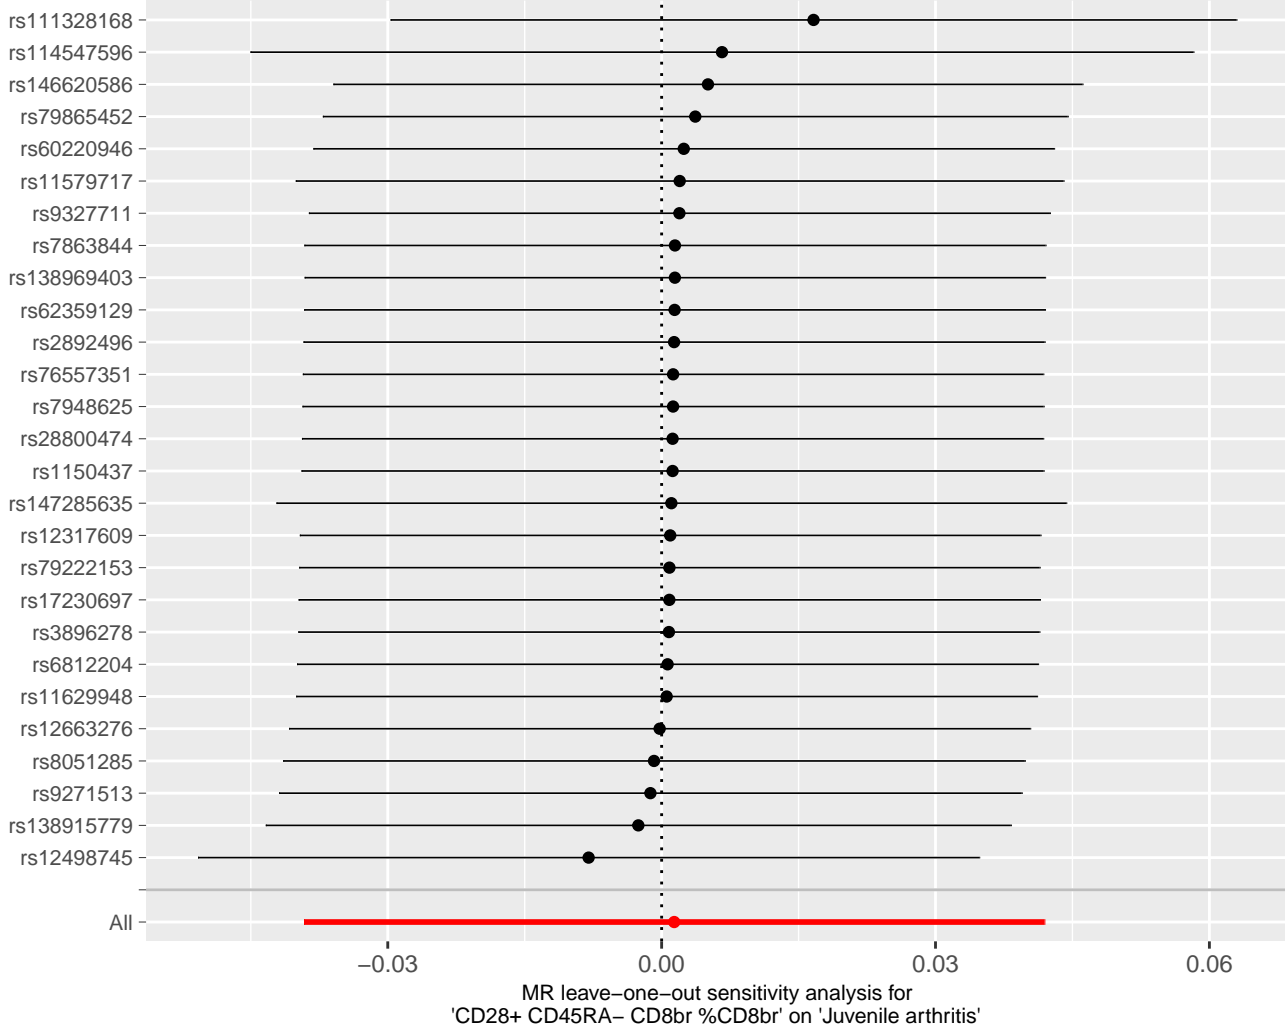

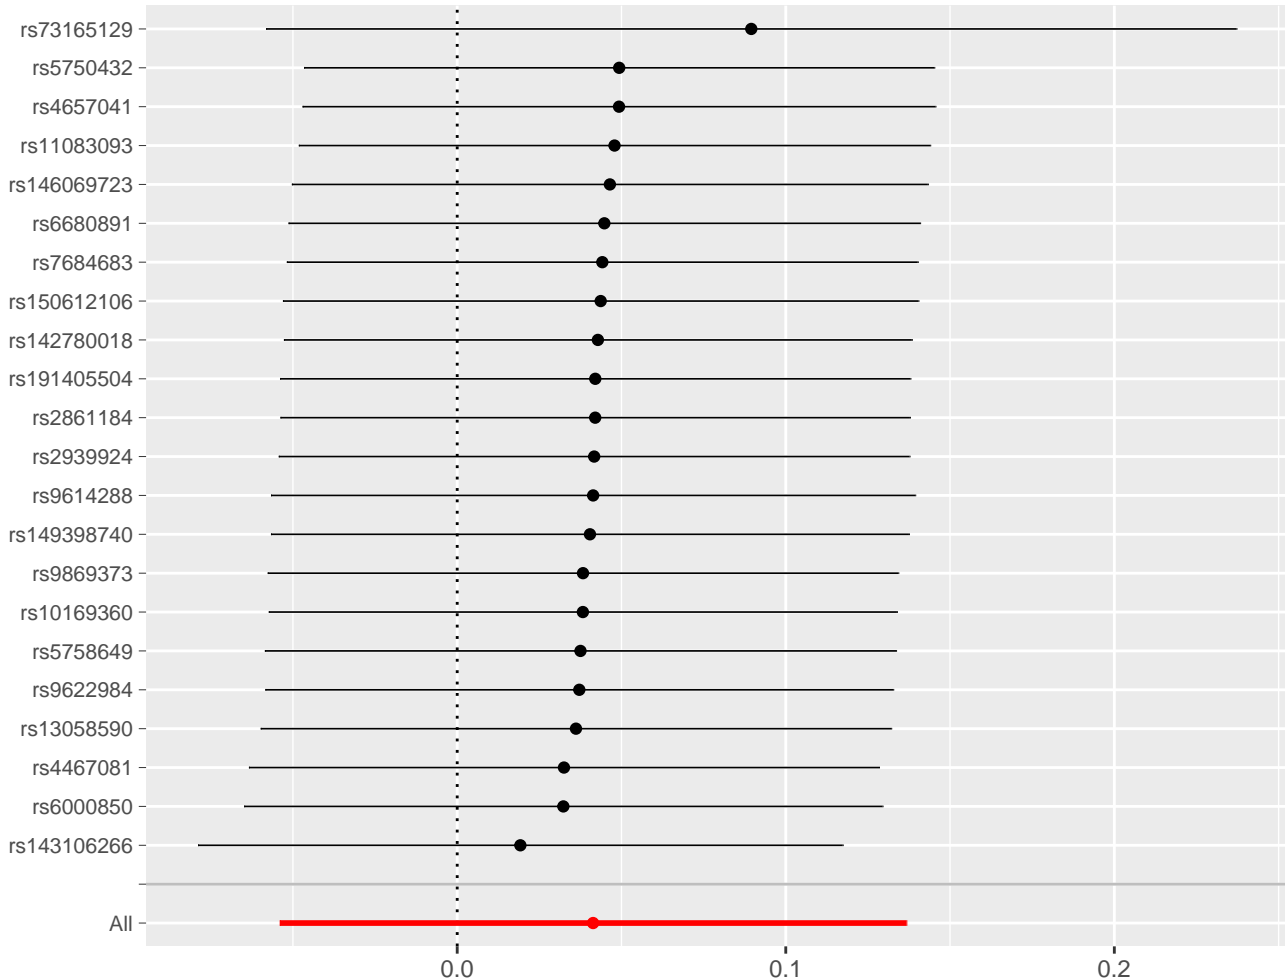

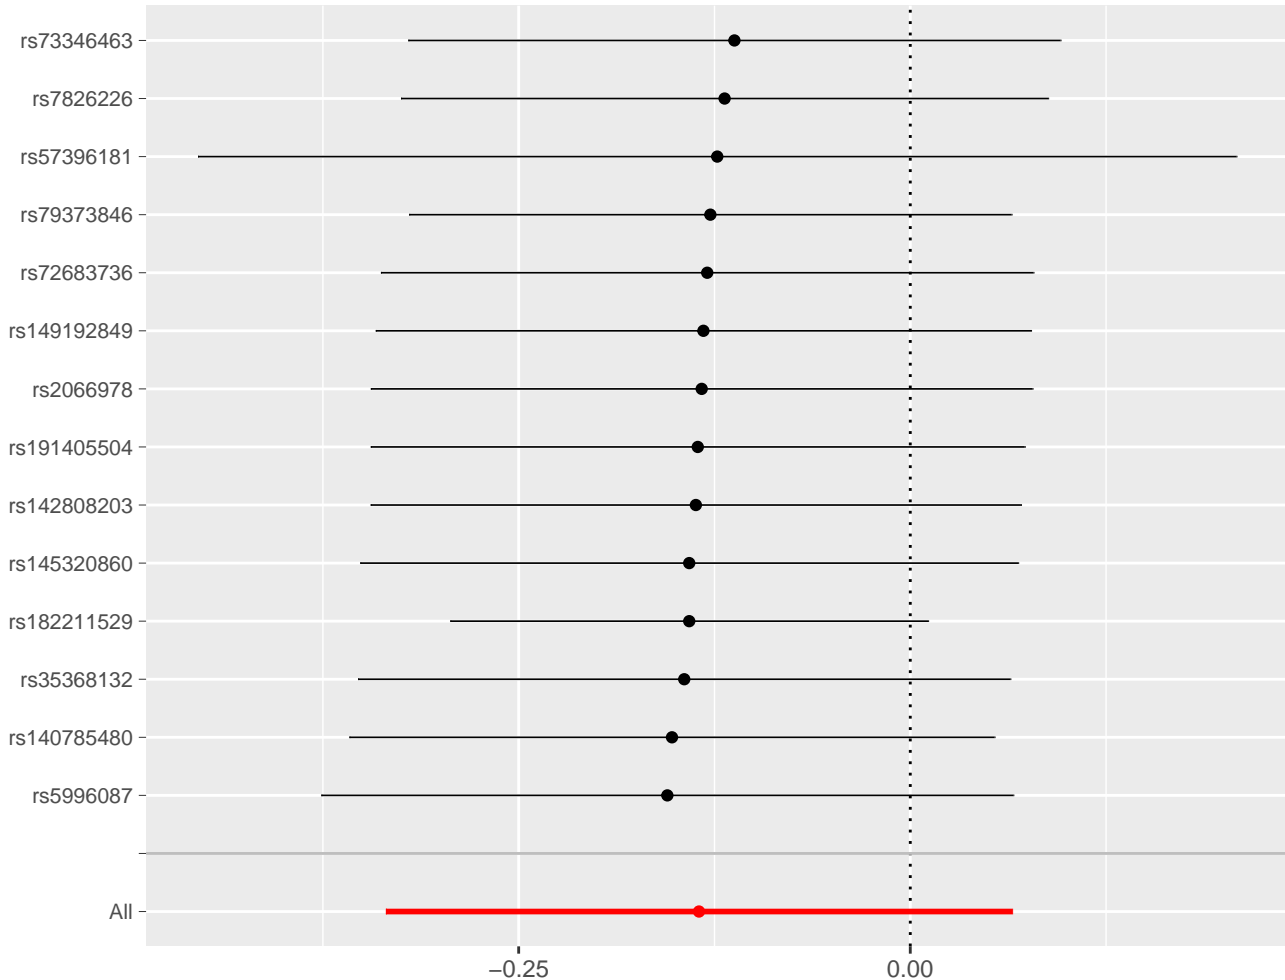

-0.25

0.00

MR leave-one-out sensitivity analysis for  
'BAFF-R on CD20-' on 'Juvenile arthritis'



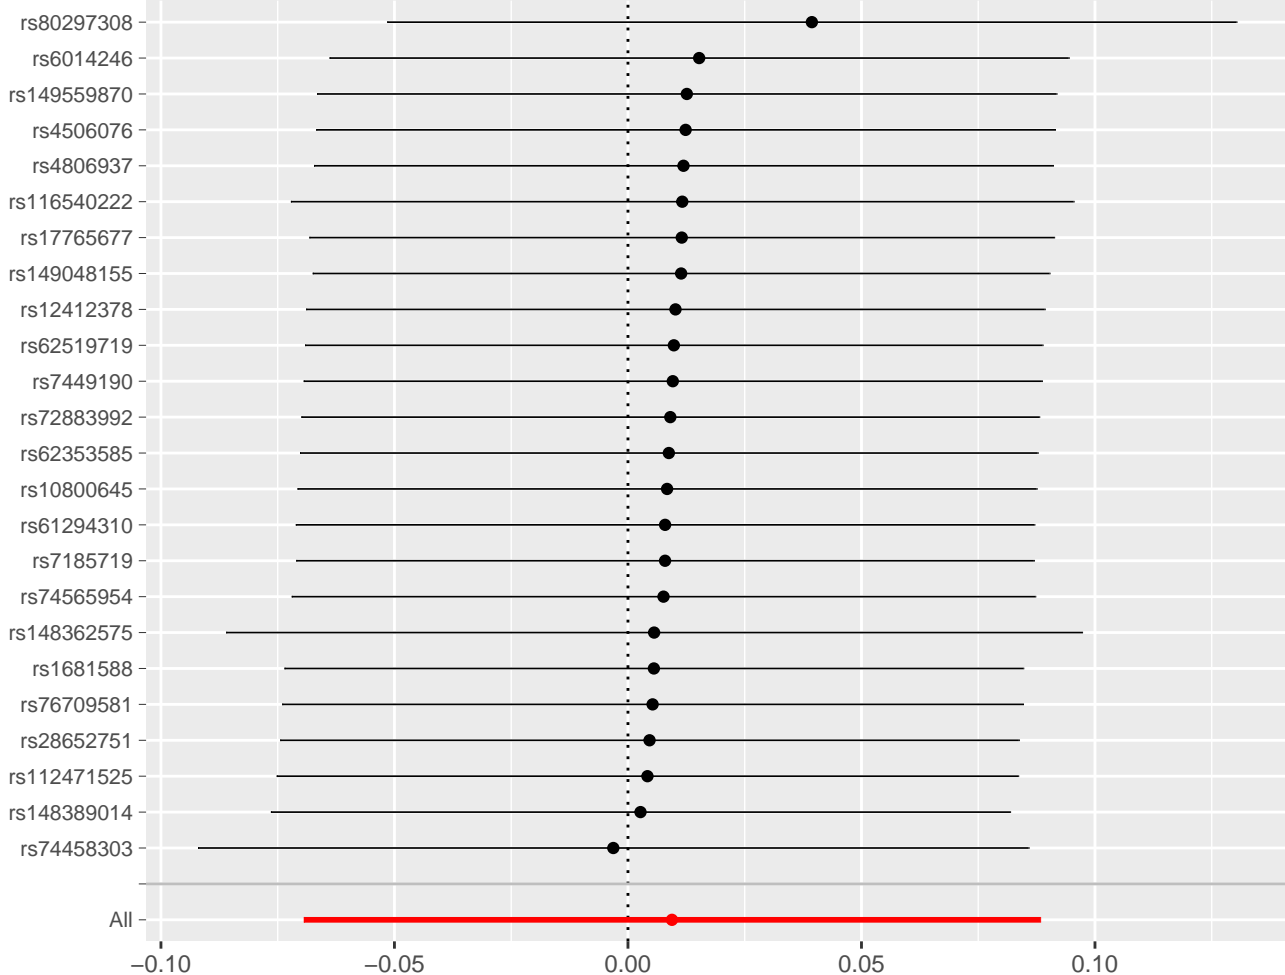

MR leave-one-out sensitivity analysis for 'PB/PC AC' on 'Juvenile arthritis'

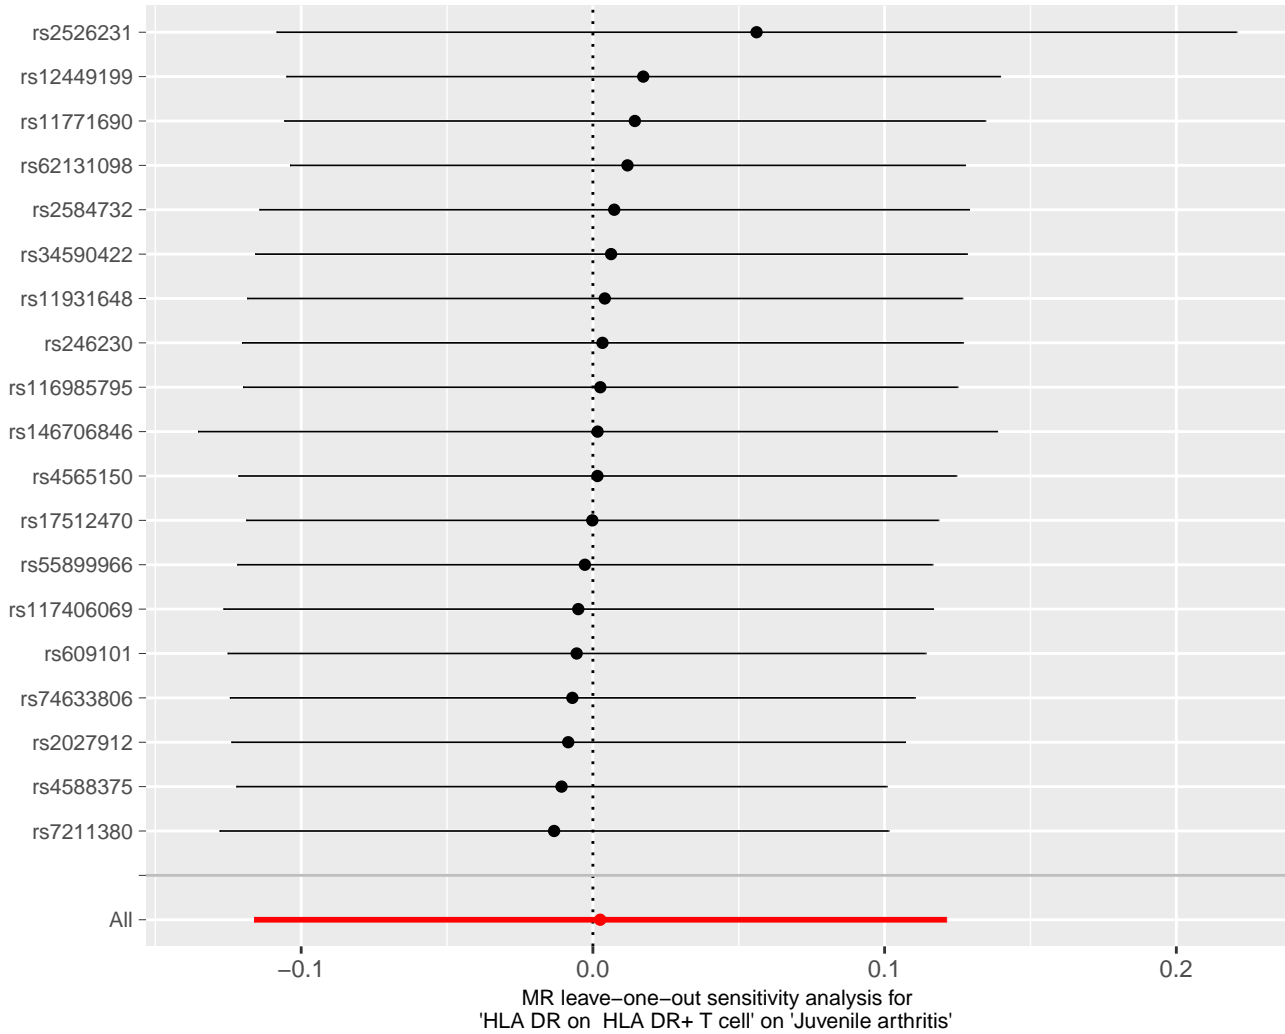

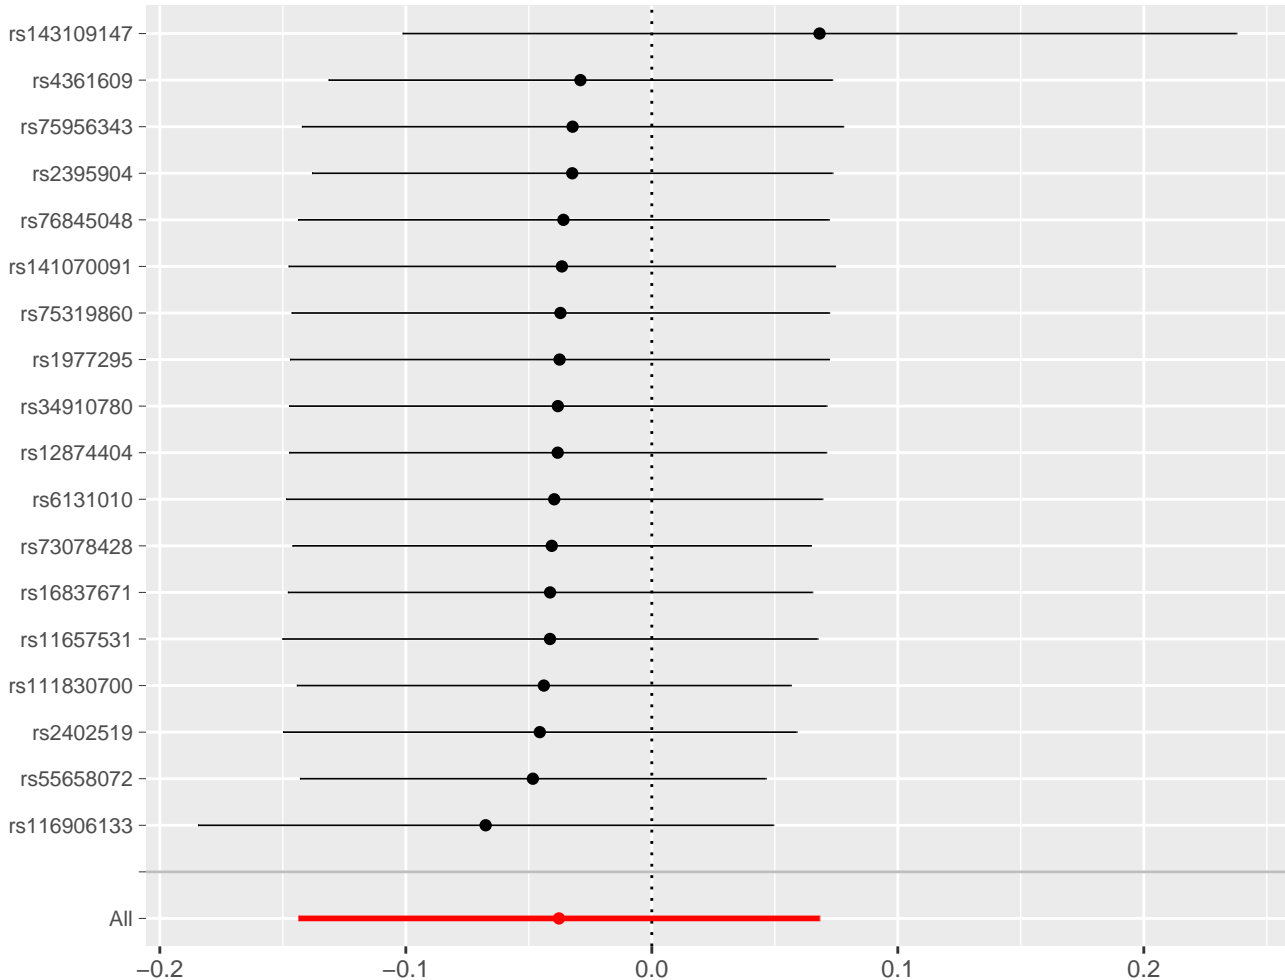

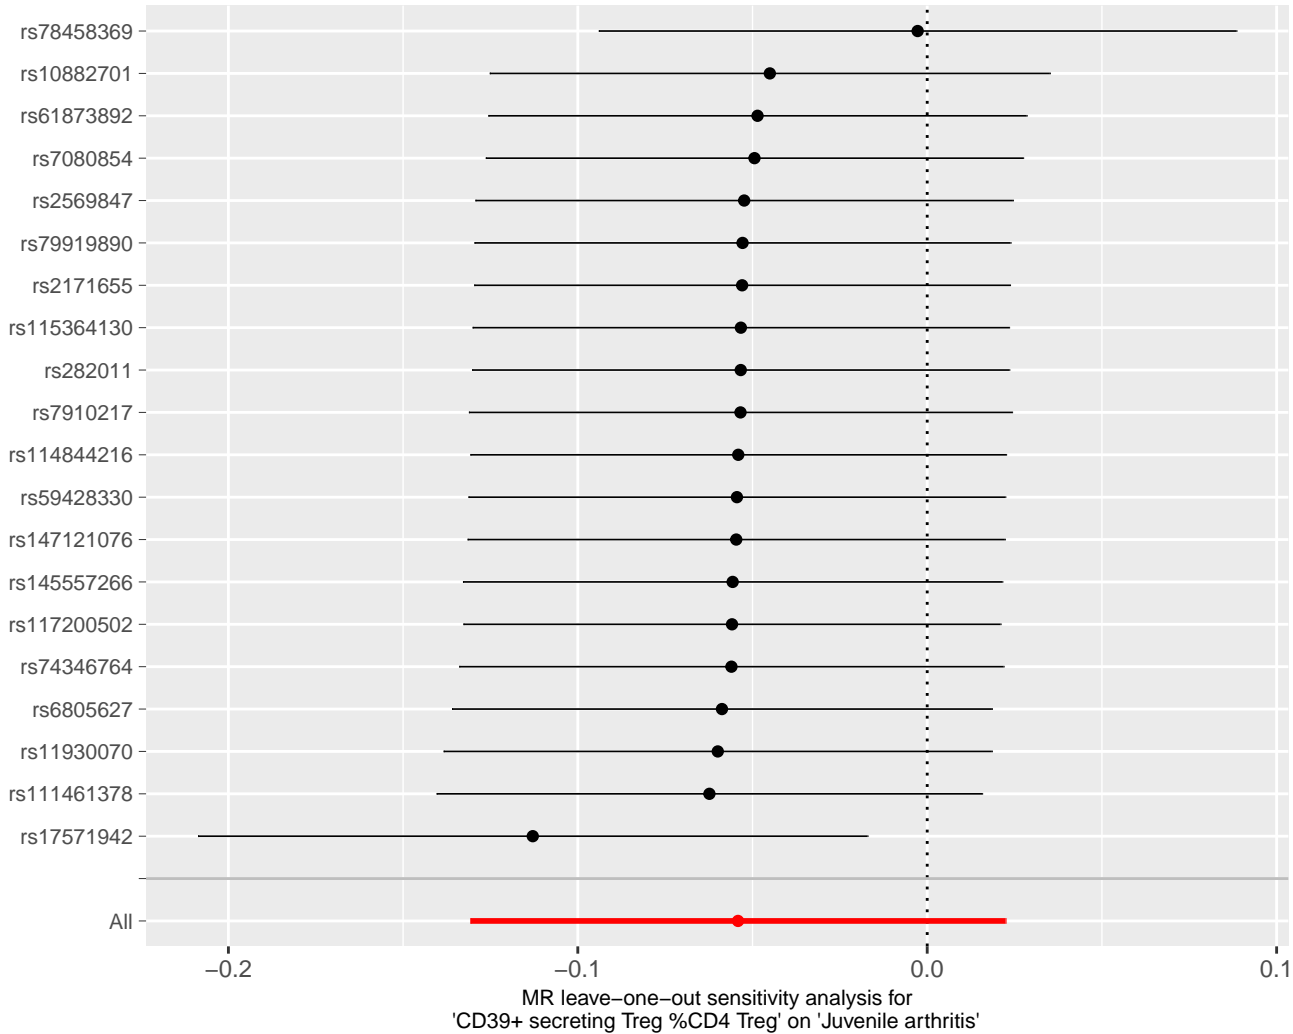

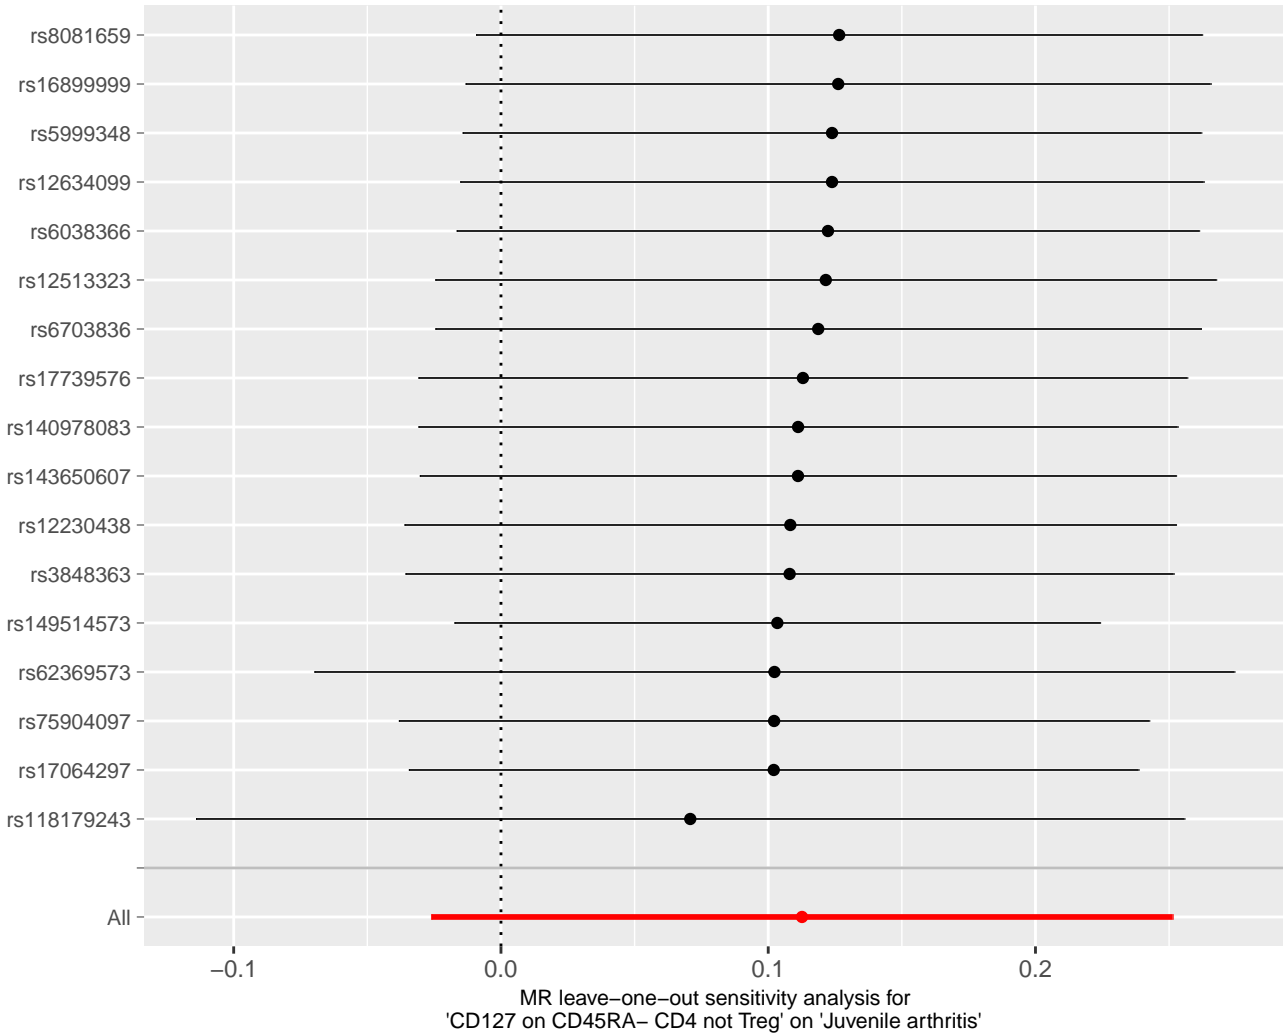

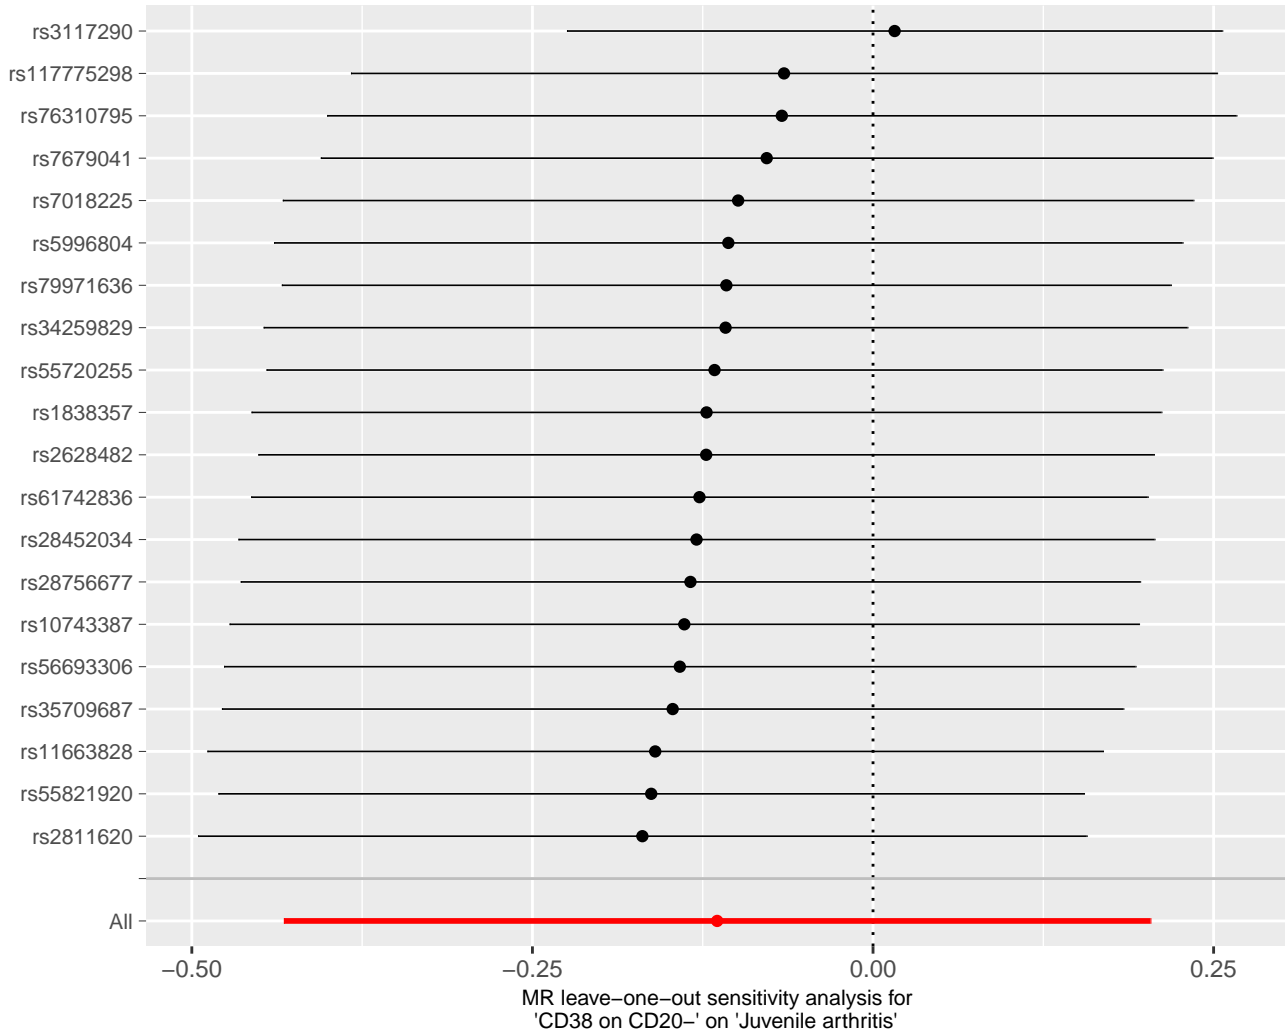

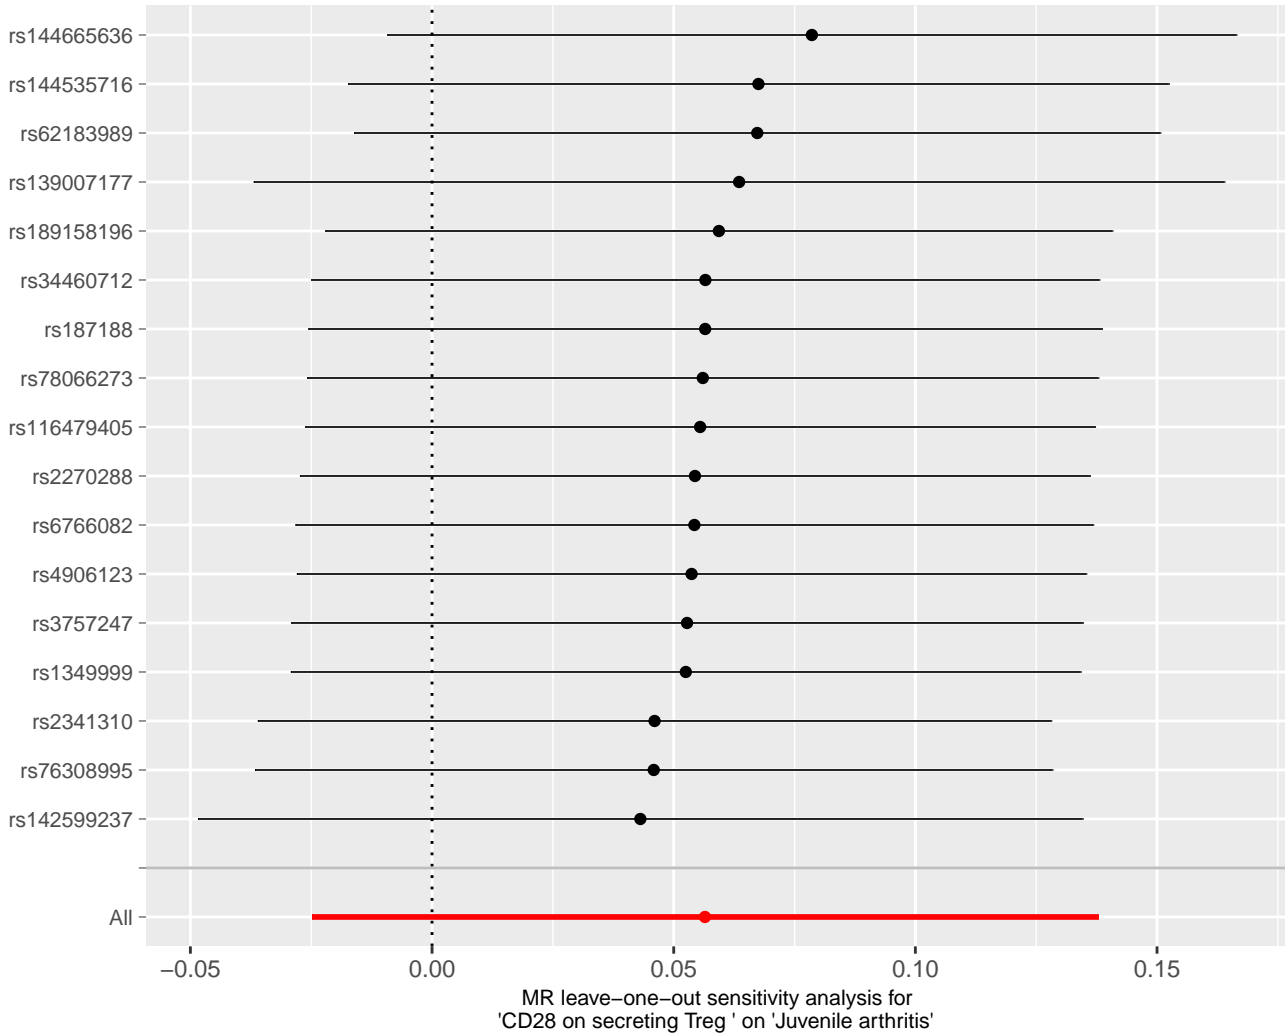

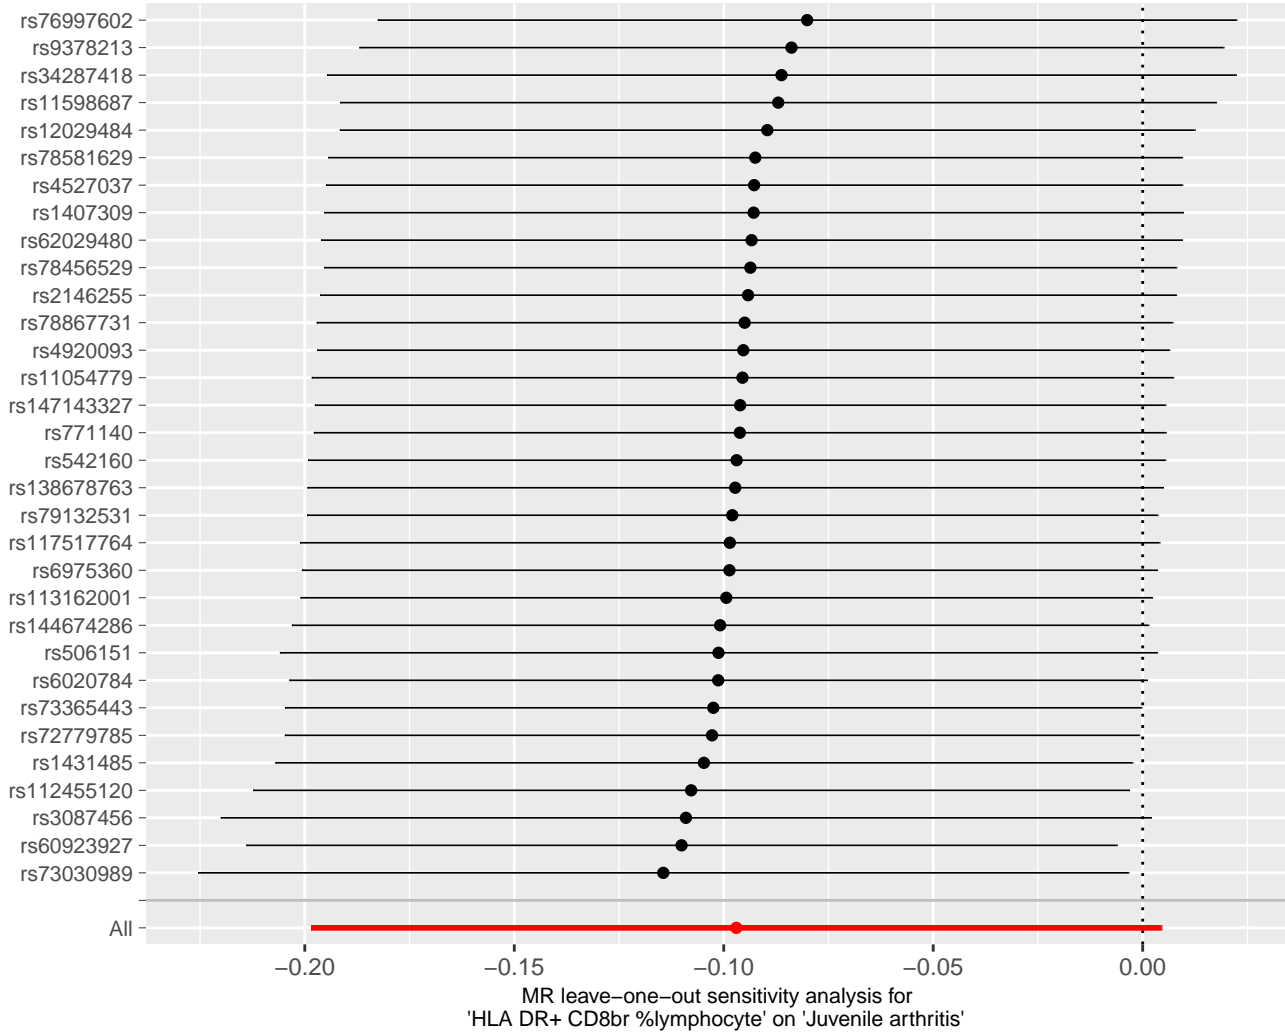



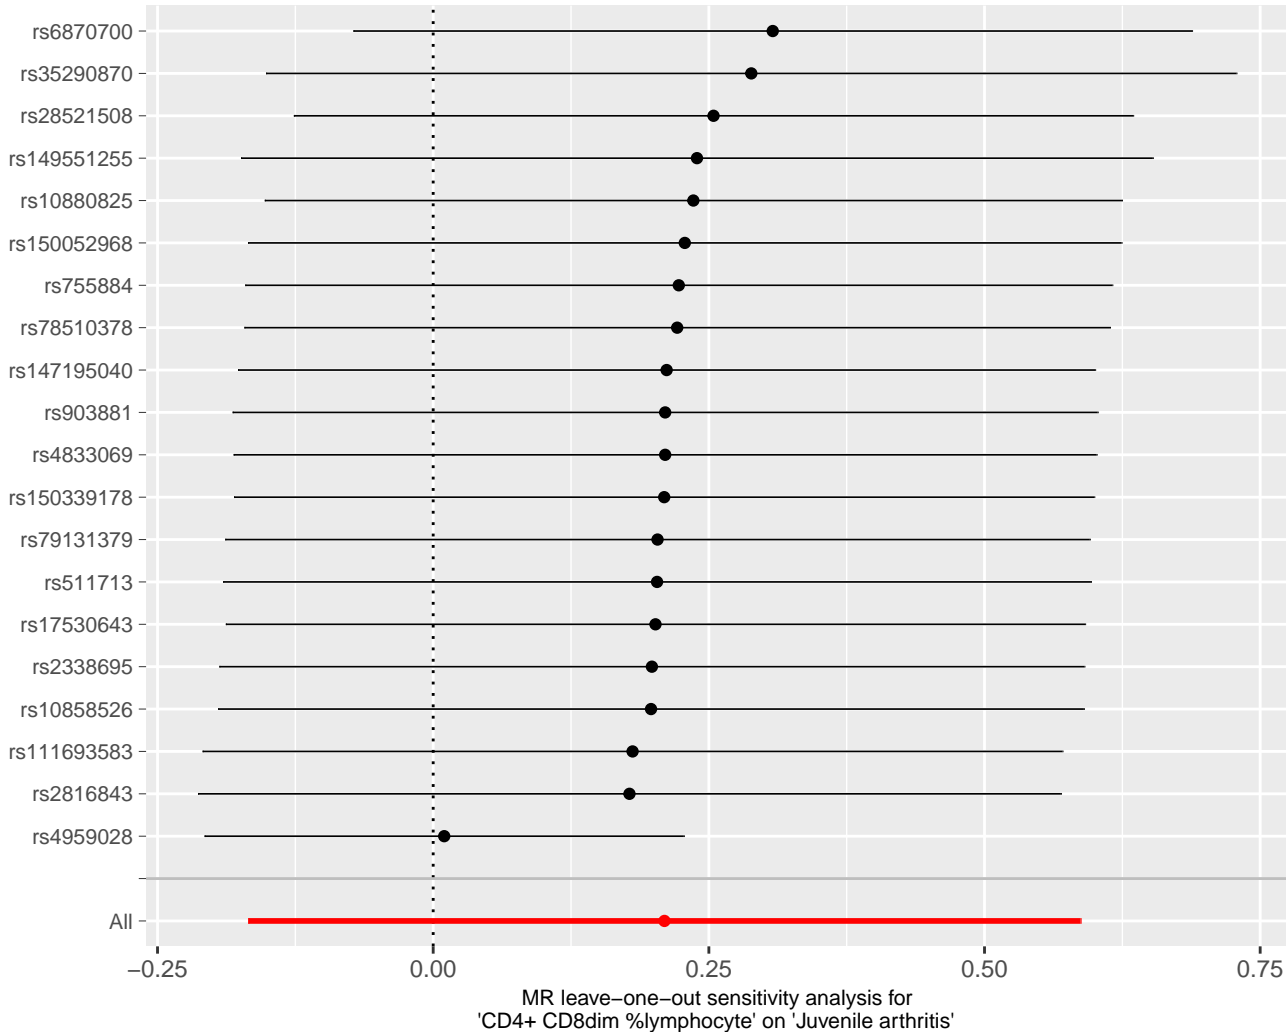

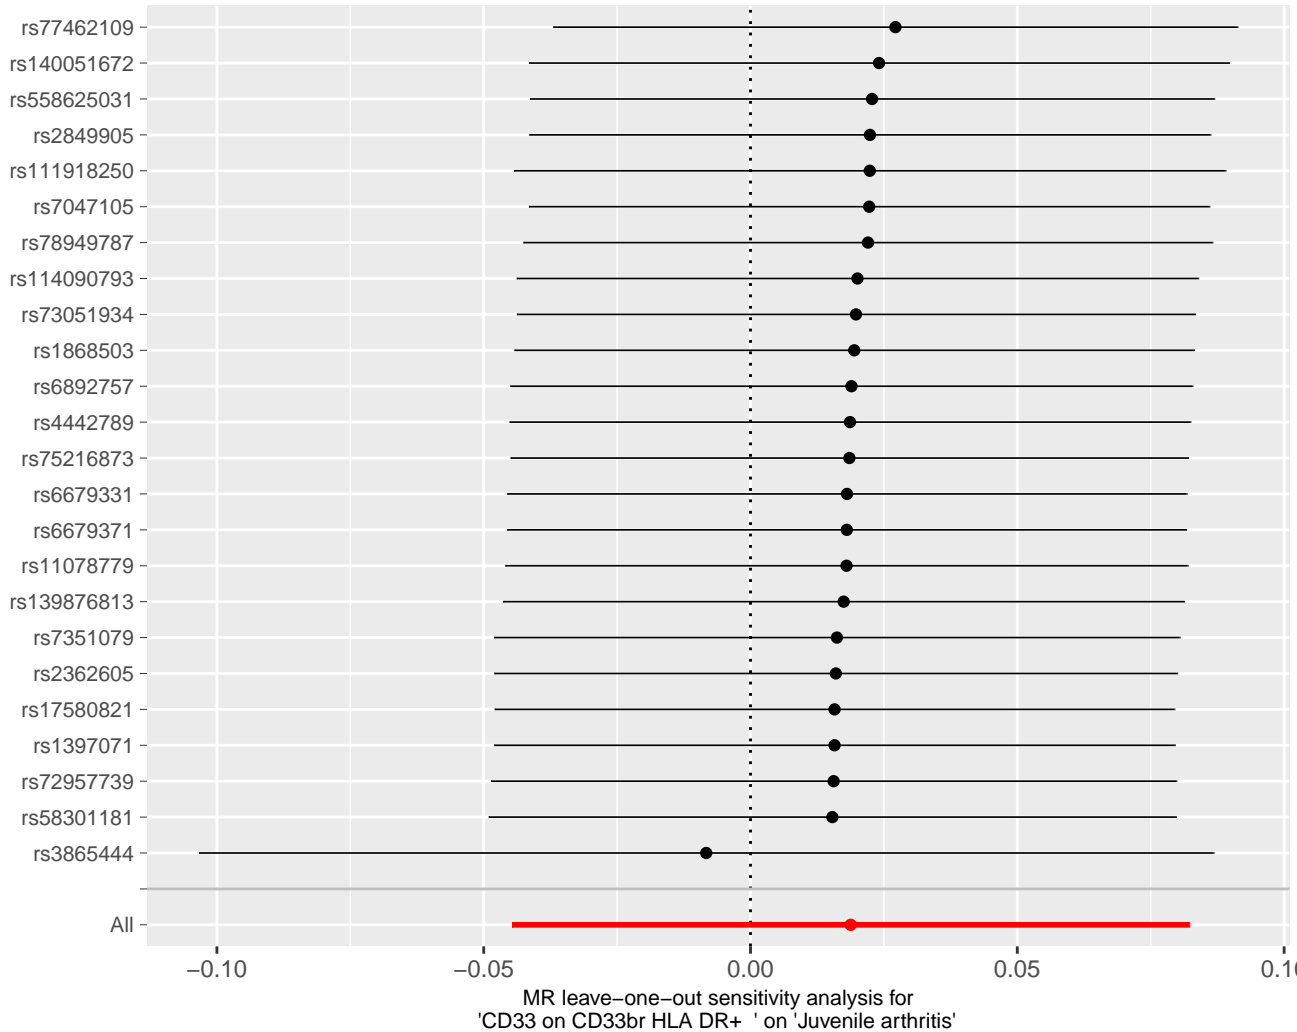

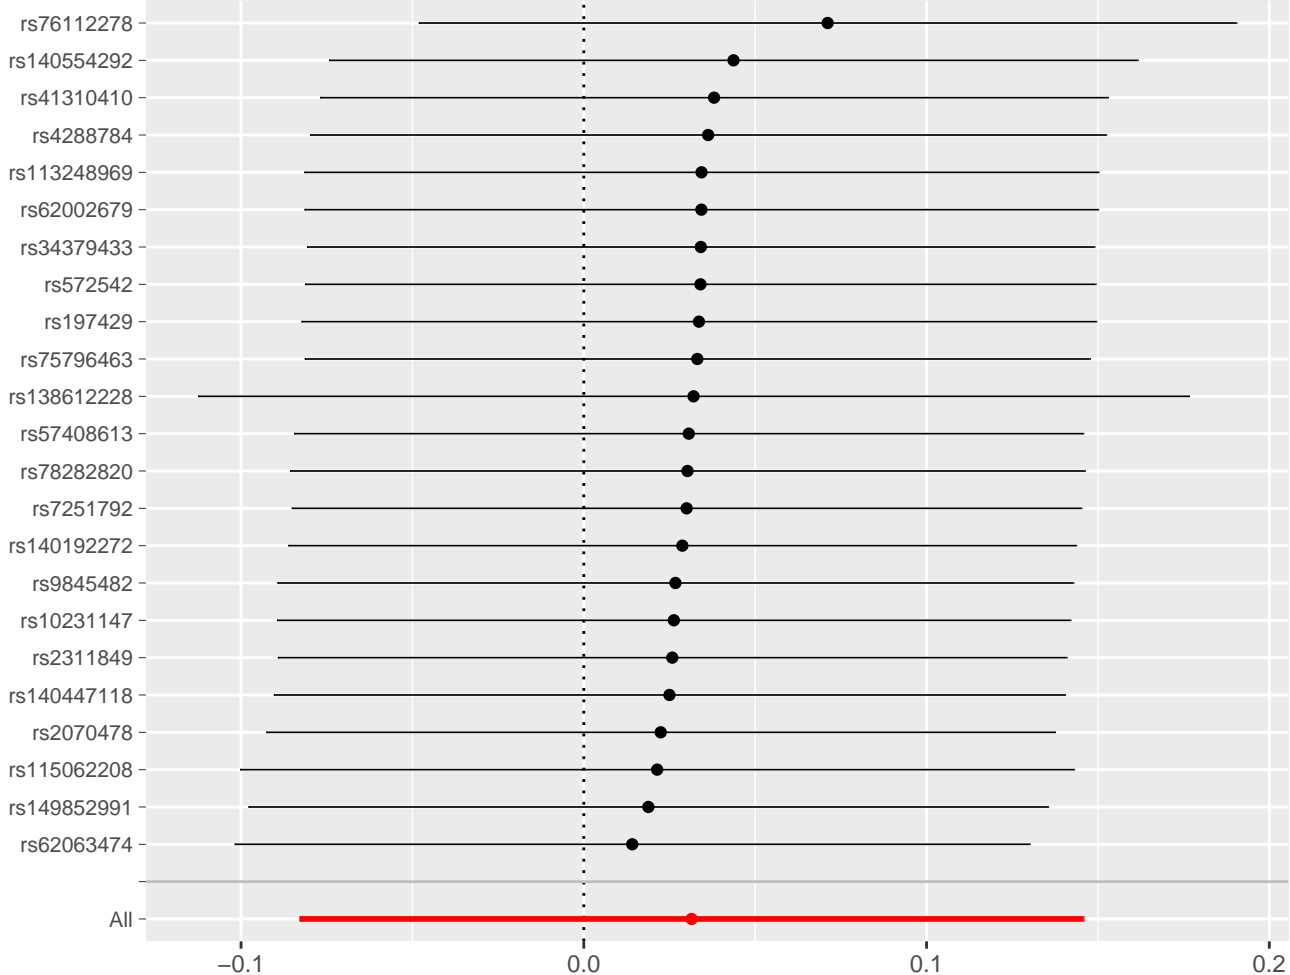

MR leave-one-out sensitivity analysis for 'CD38 on transitional' on 'Juvenile arthritis'

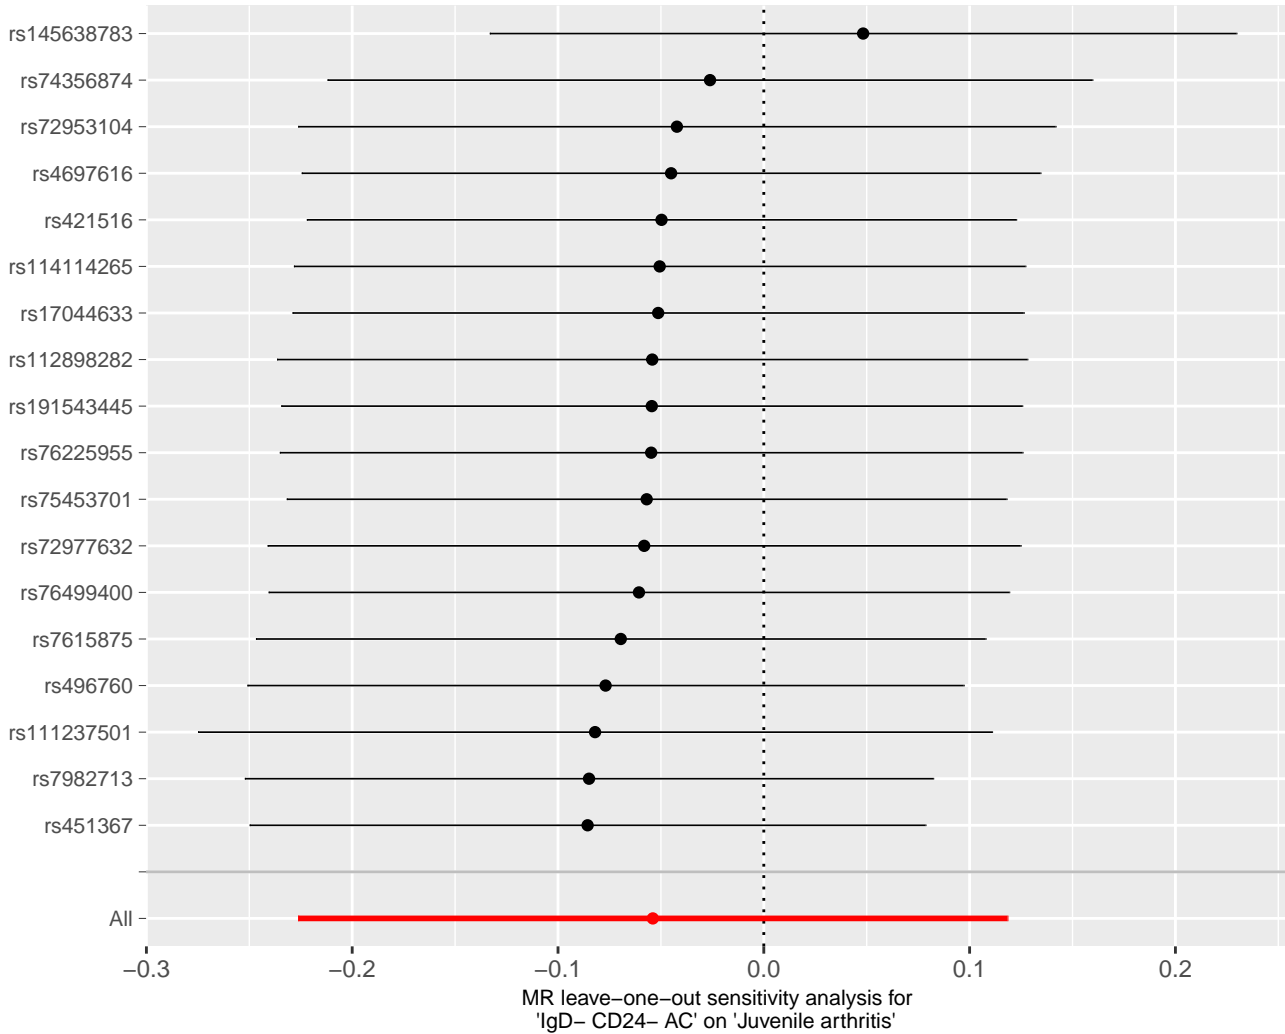

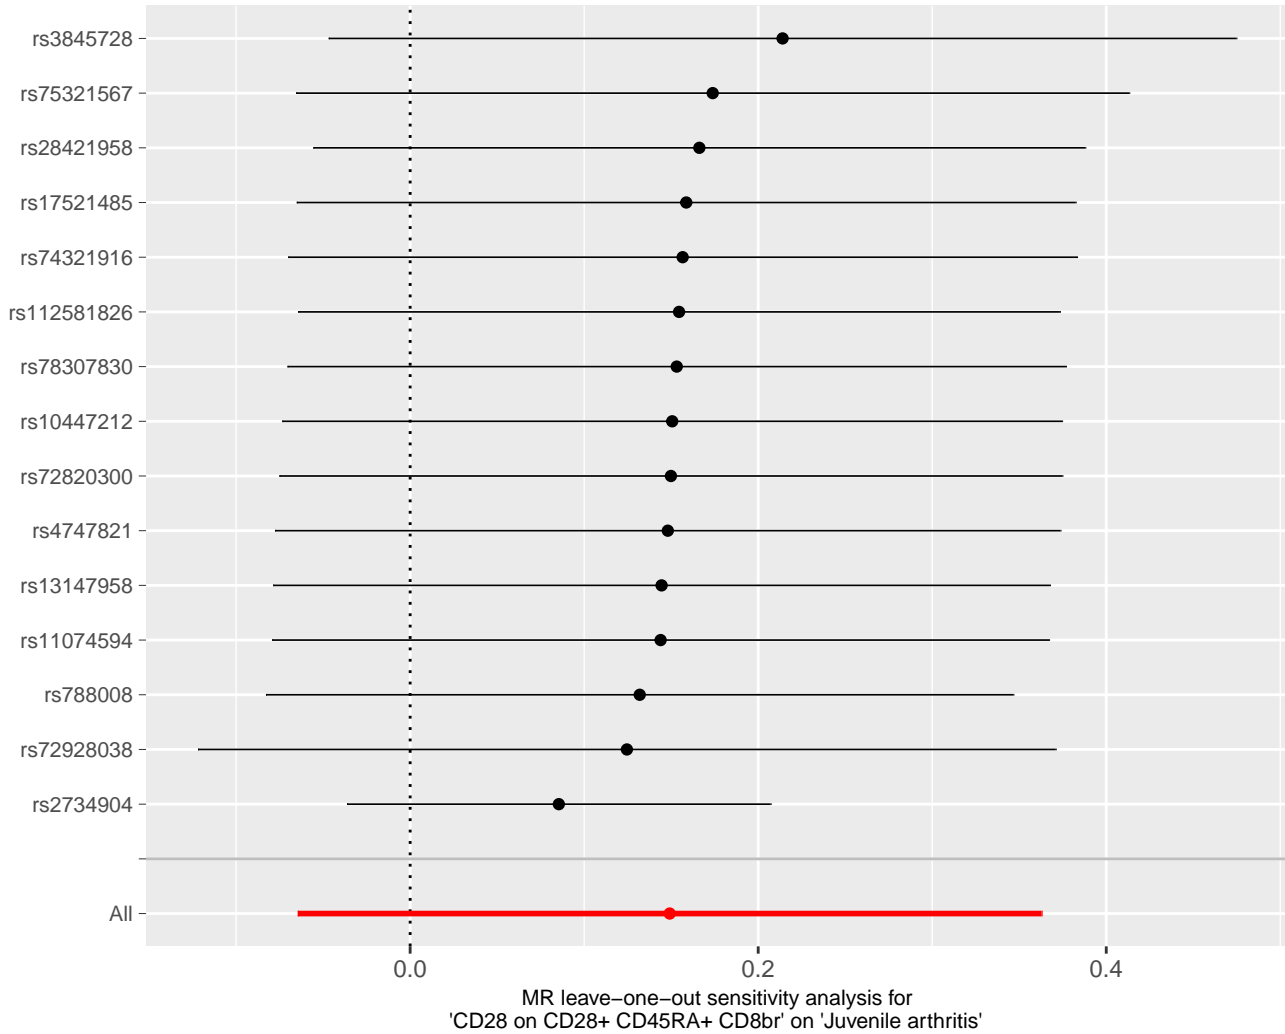

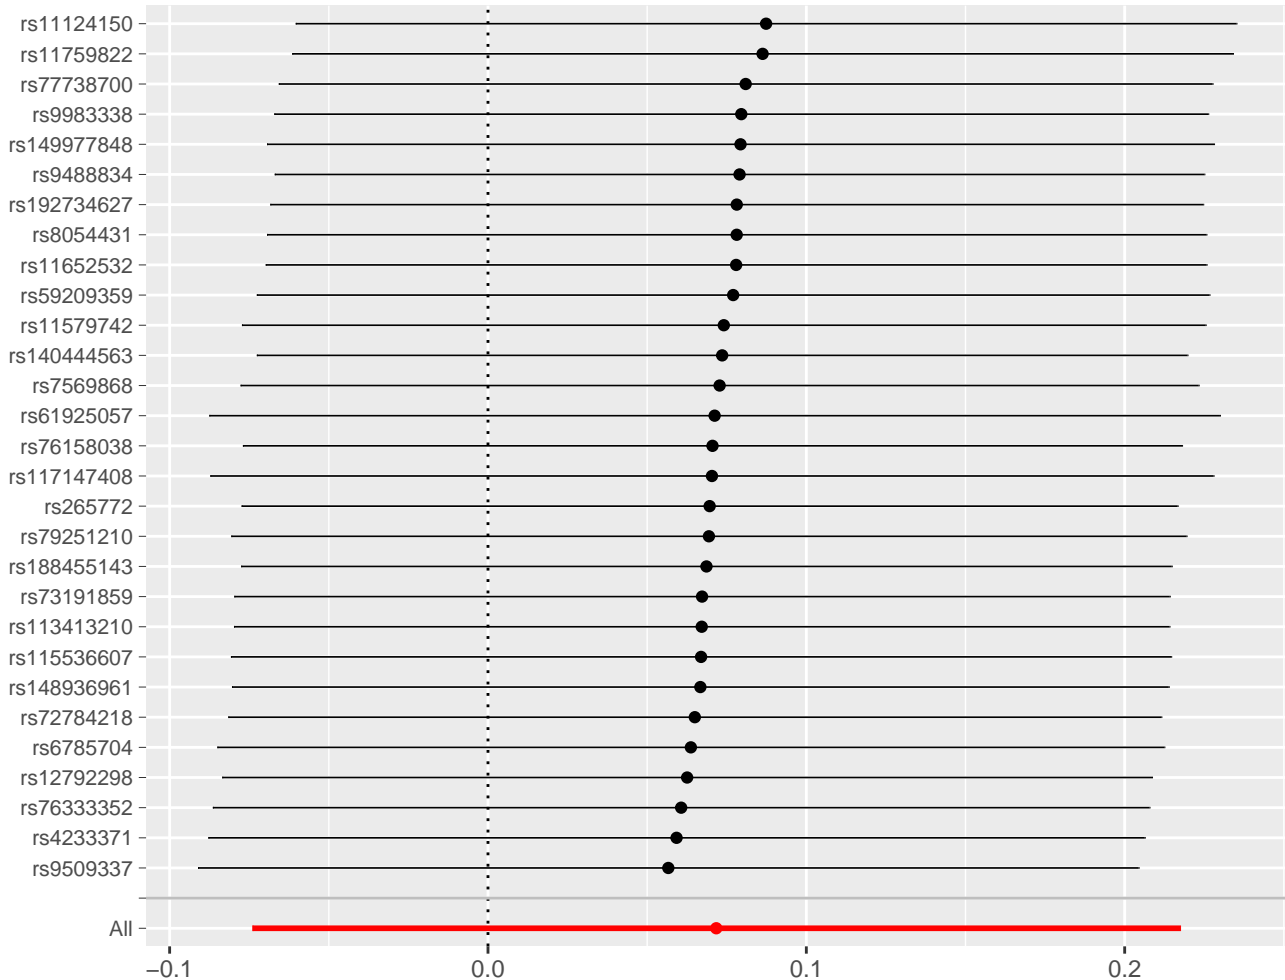

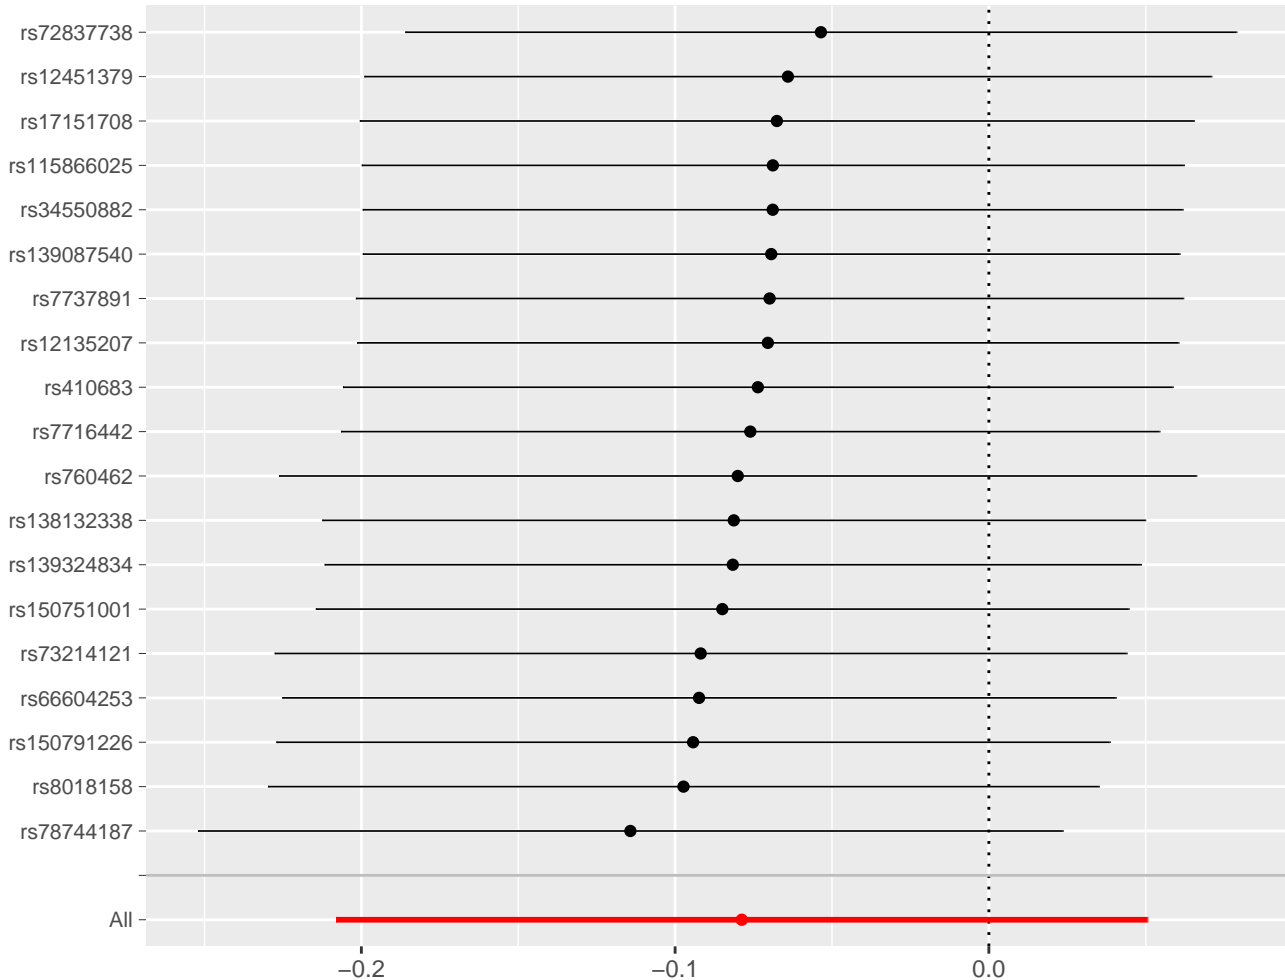

MR leave-one-out sensitivity analysis for 'CD11b on basophil' on 'Juvenile arthritis'

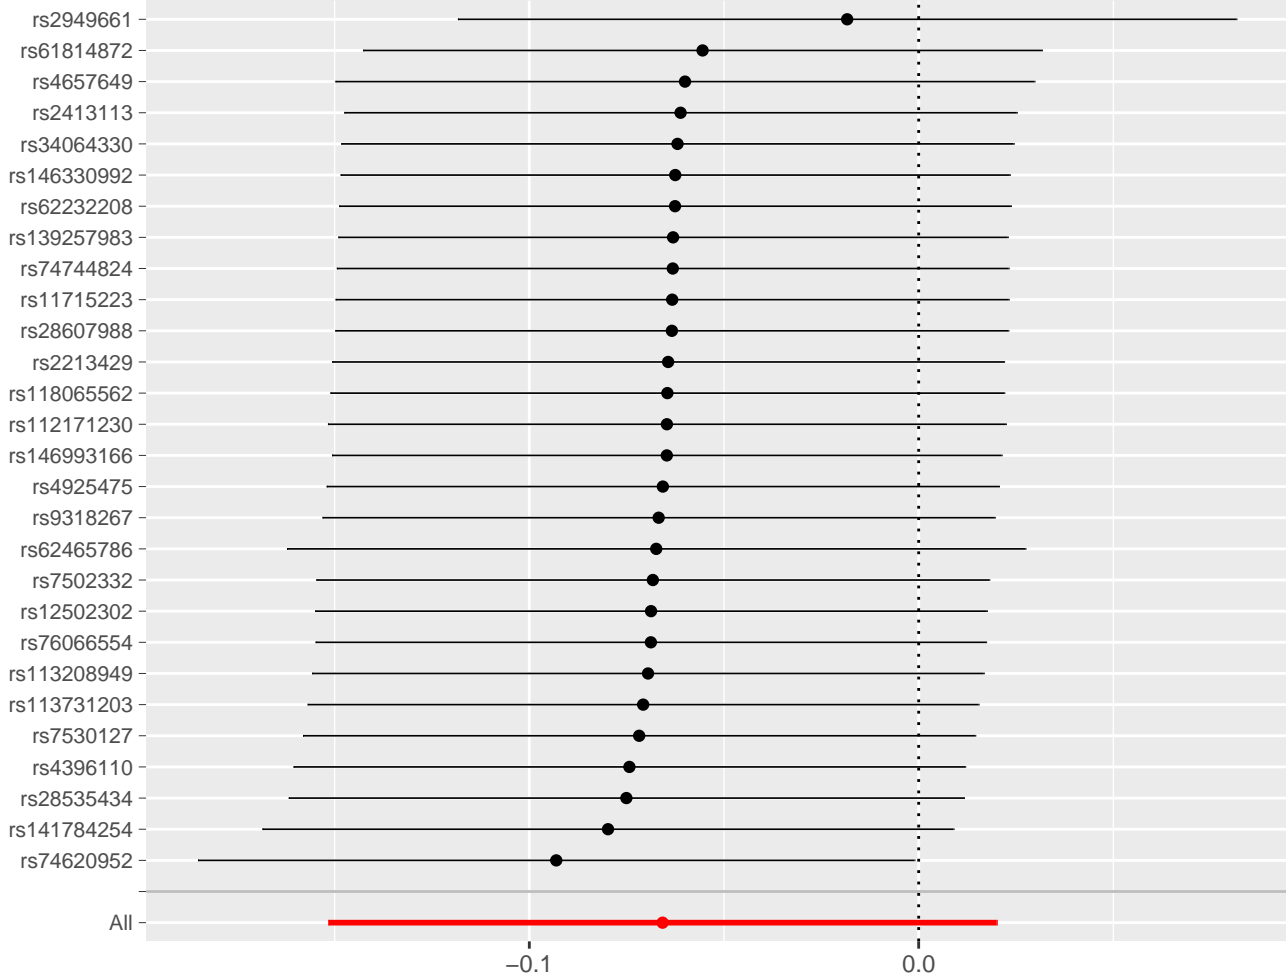

MR leave-one-out sensitivity analysis for  
'CD3 on Naive CD4+' on 'Juvenile arthritis'



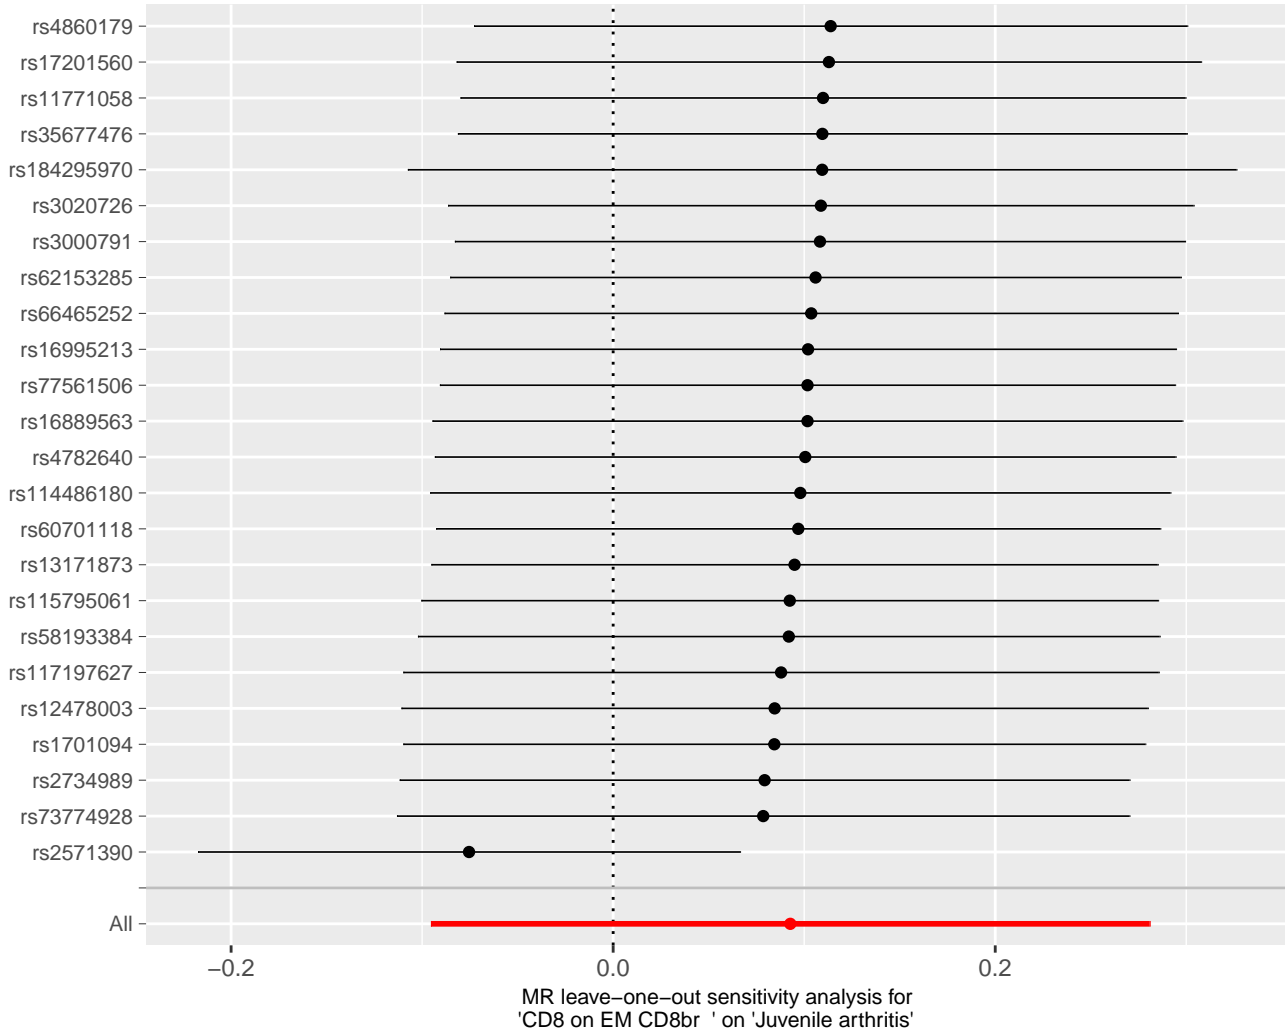

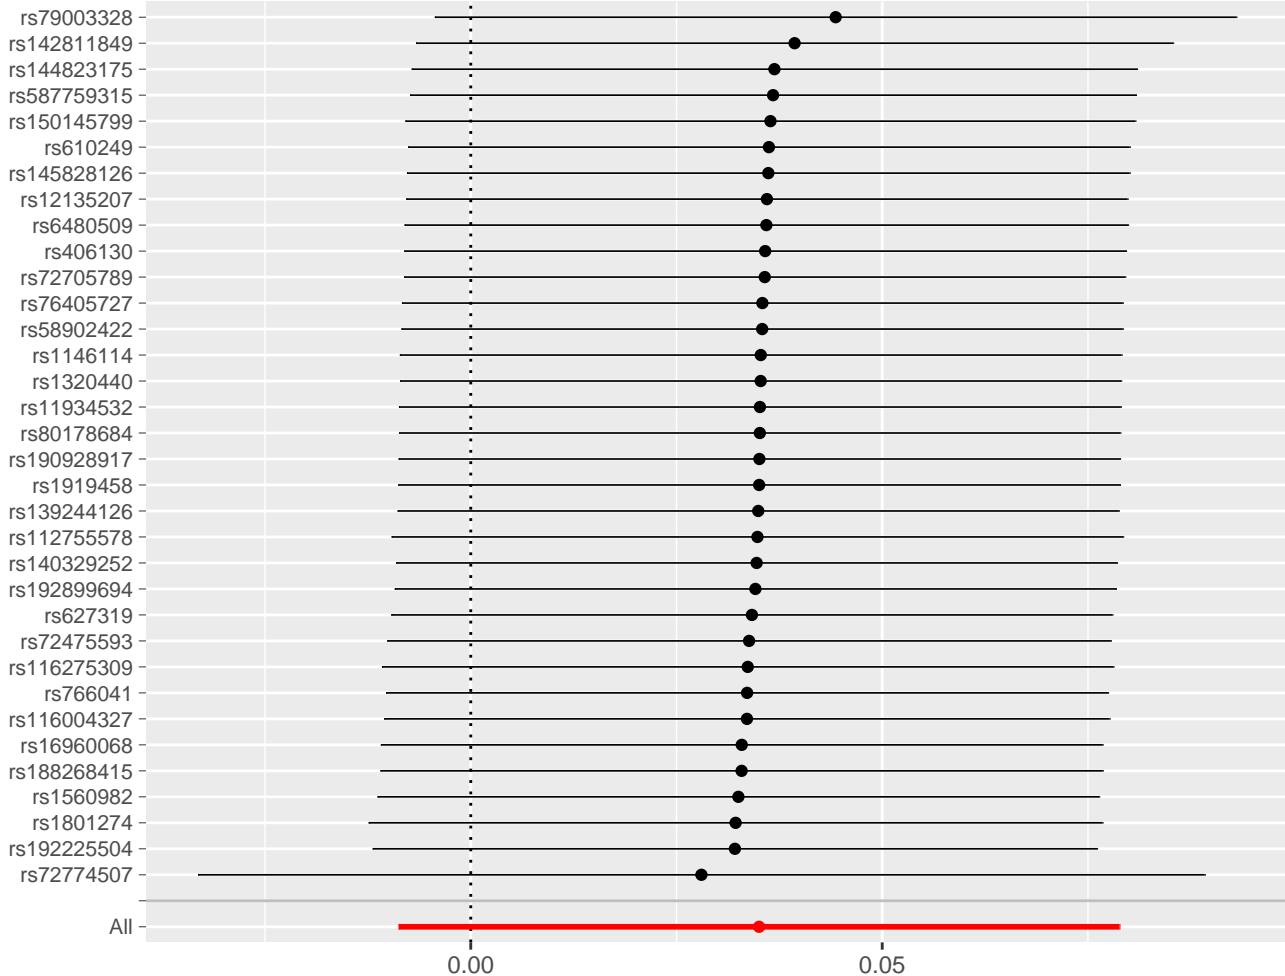

MR leave-one-out sensitivity analysis for 'CD64 on CD14+ CD16- monocyte' on 'Juvenile arthritis'

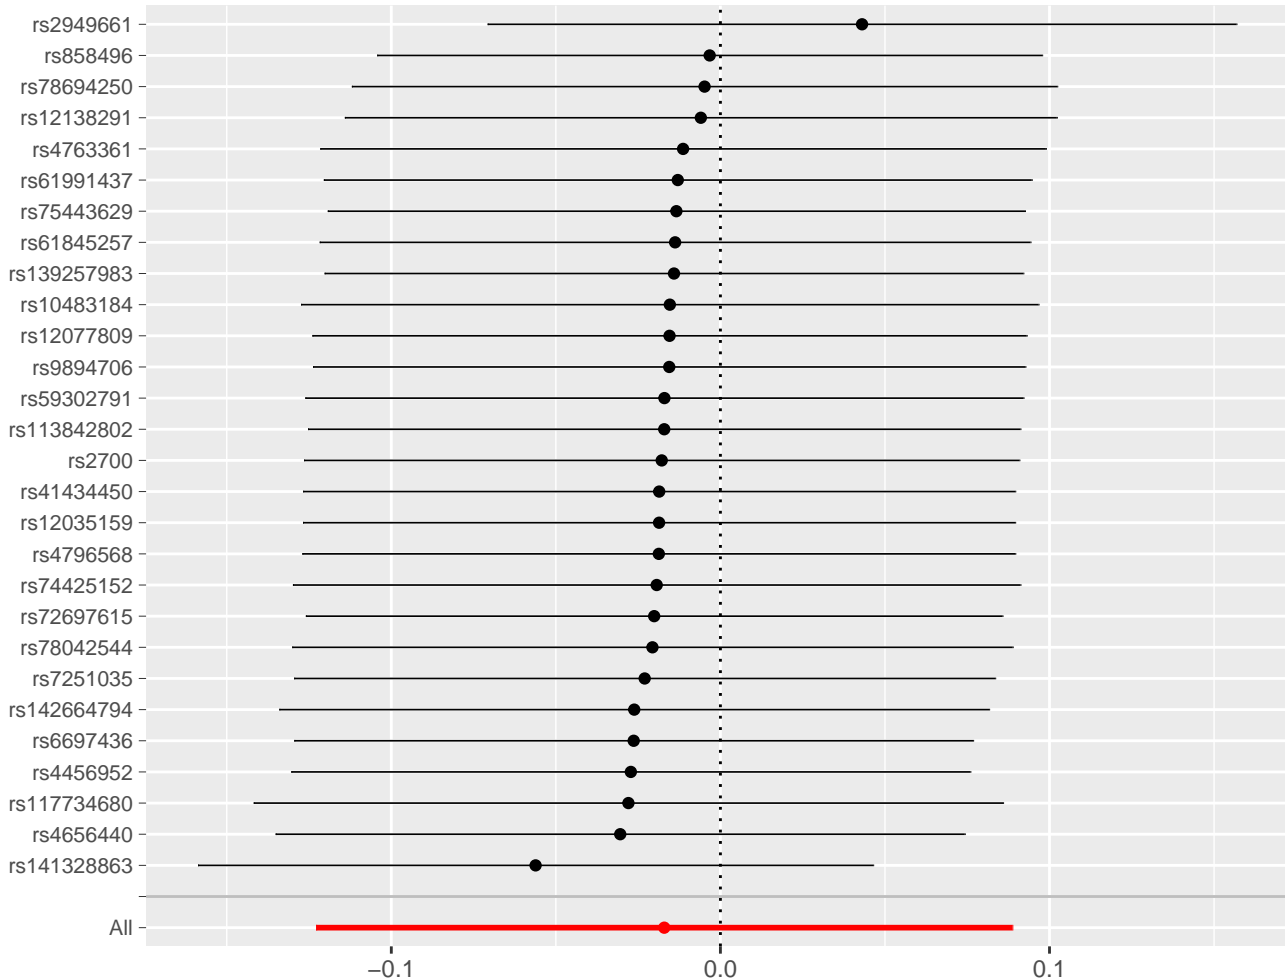

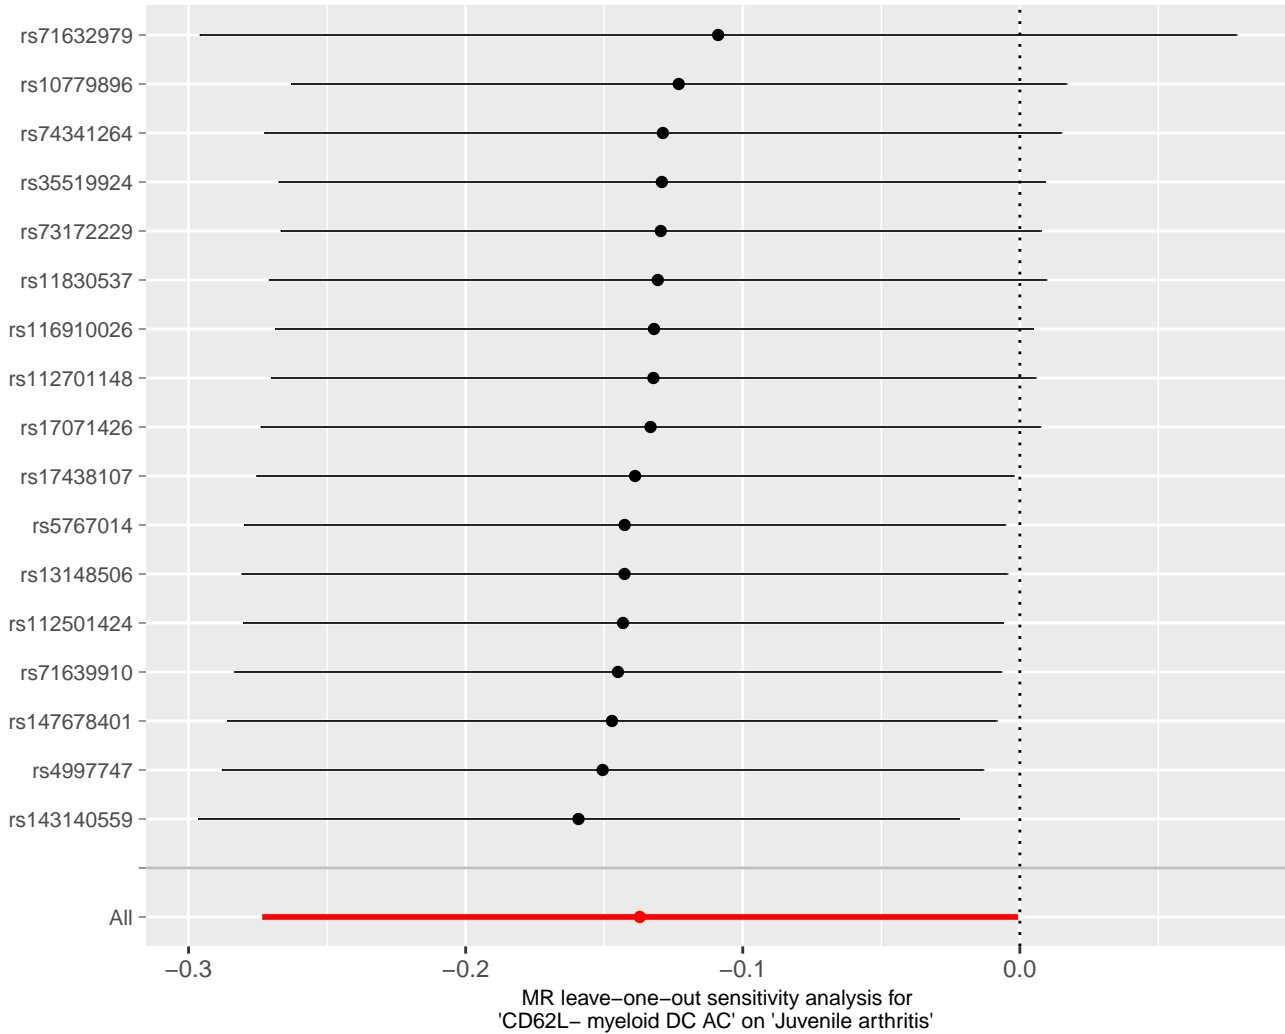

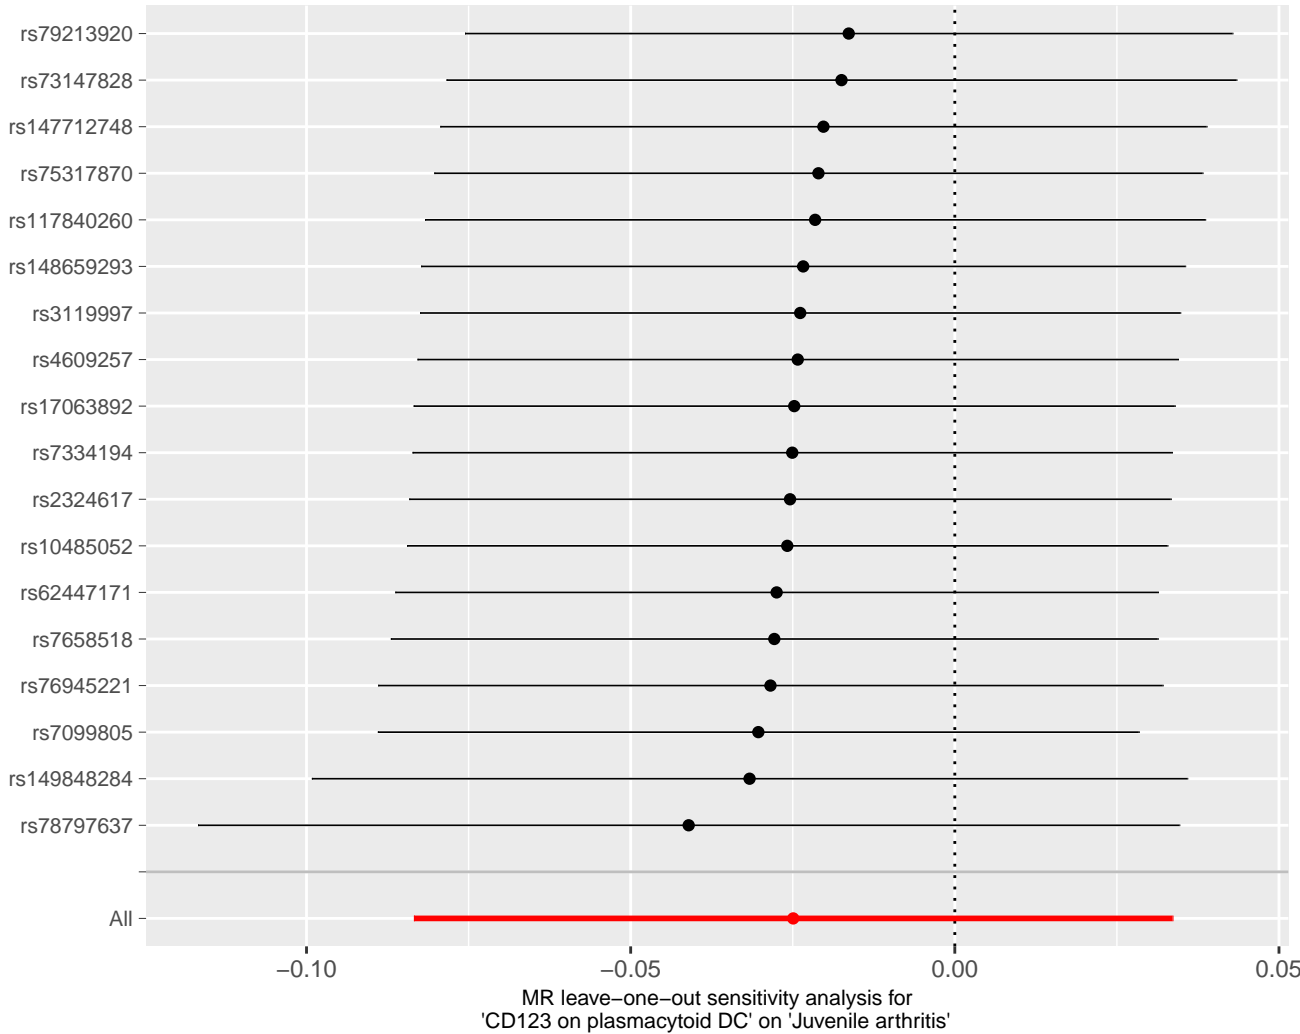

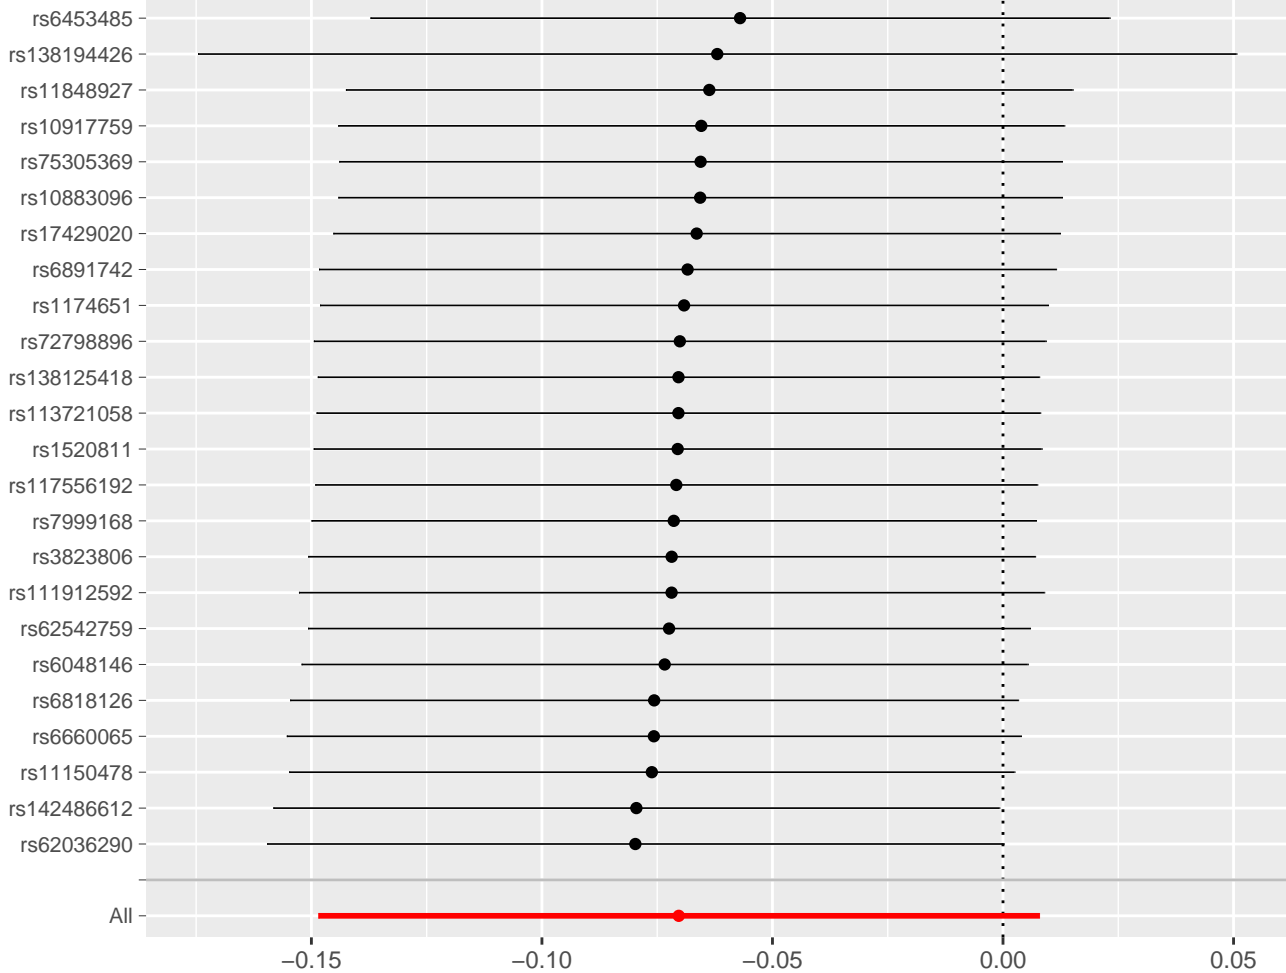

MR leave-one-out sensitivity analysis for 'CD14 on Mo MDSC' on 'Juvenile arthritis'

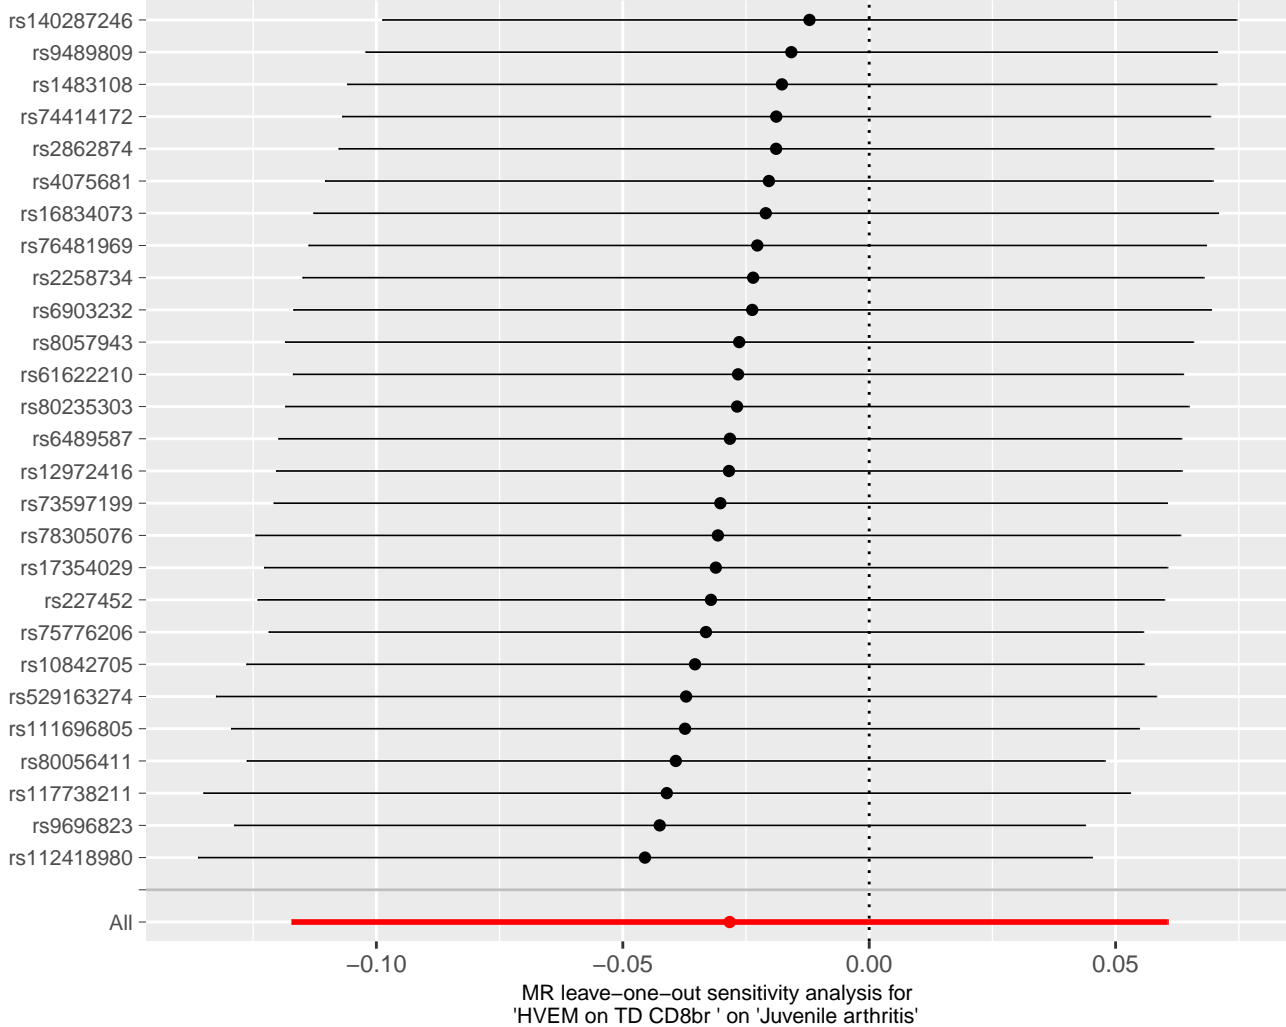

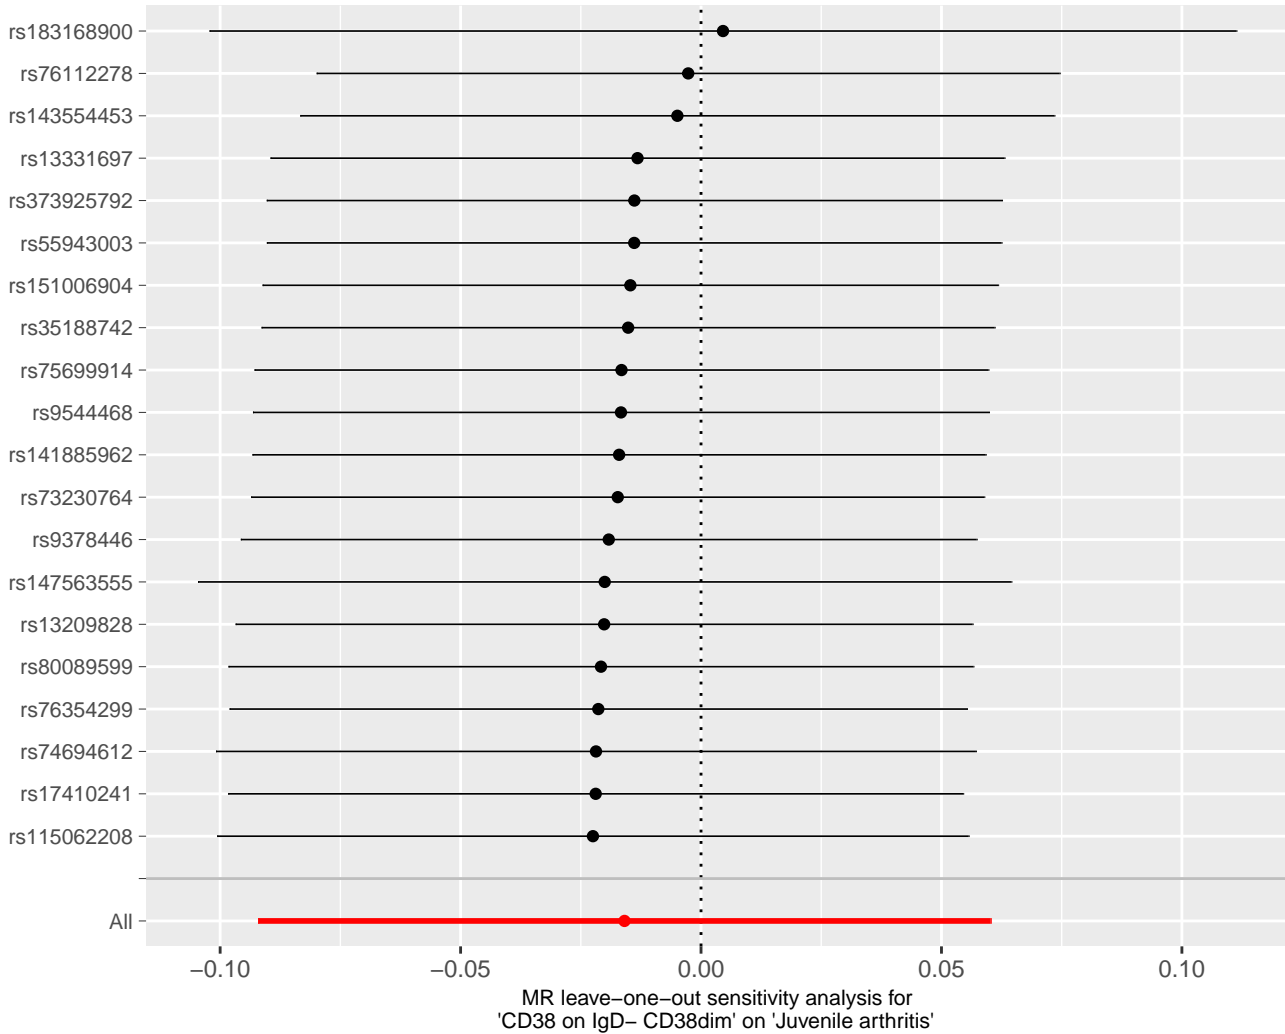



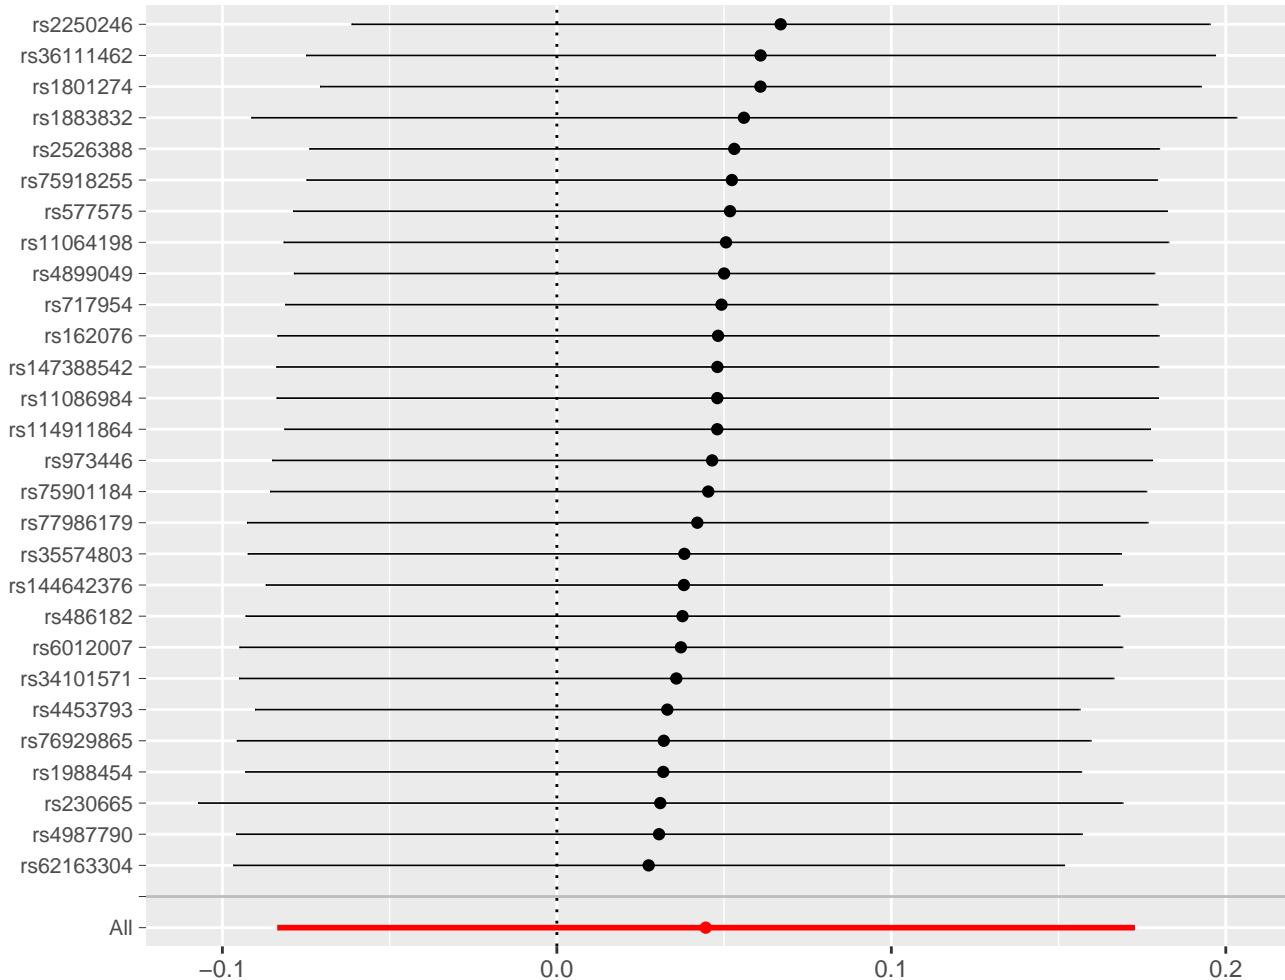

MR leave-one-out sensitivity analysis for 'CD27 on IgD- CD38-' on 'Juvenile arthritis'

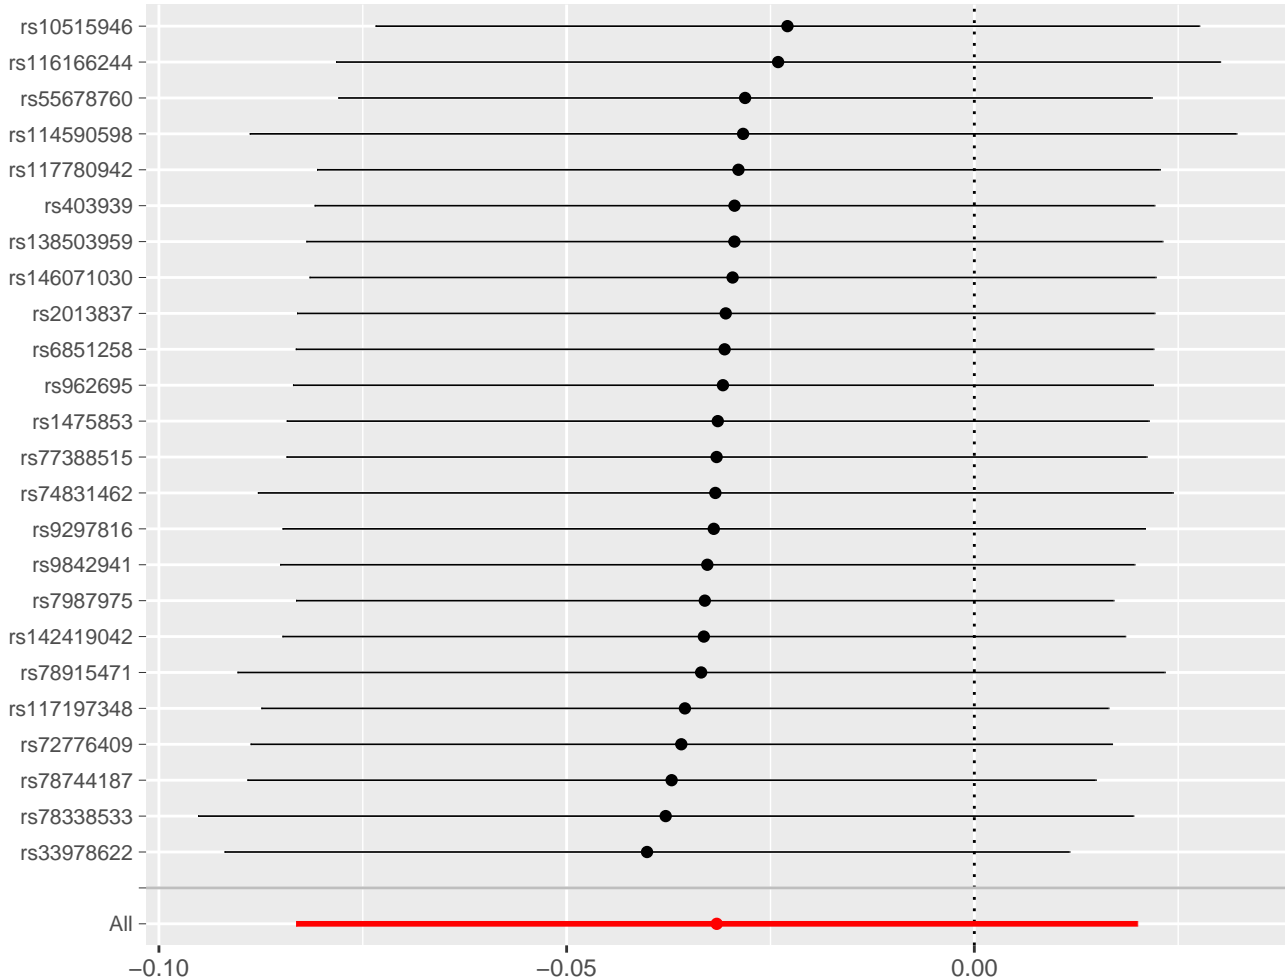

MR leave-one-out sensitivity analysis for 'CD33dim HLA DR- AC' on 'Juvenile arthritis'

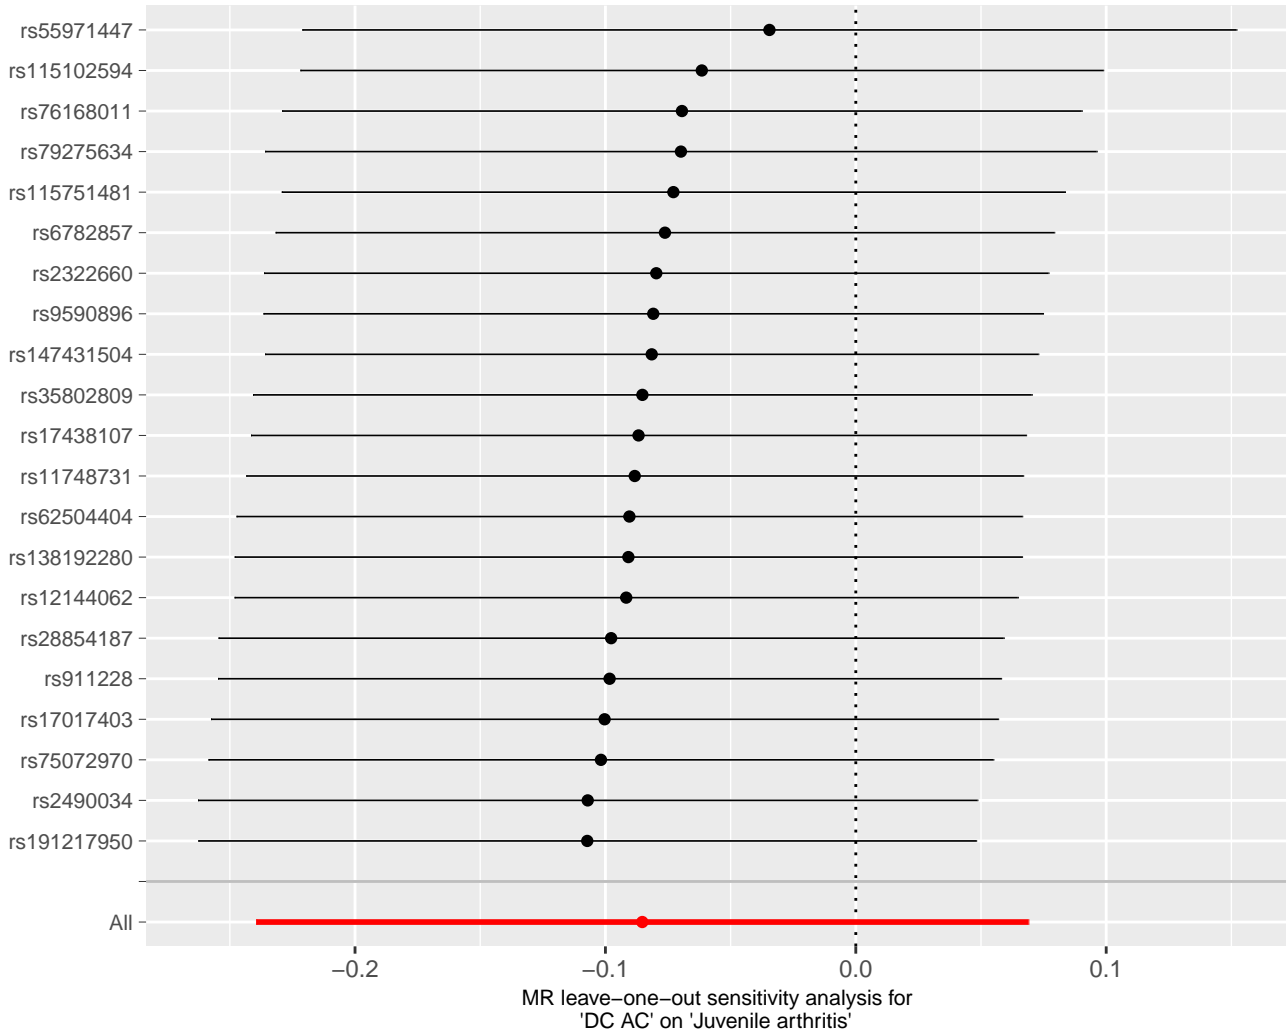

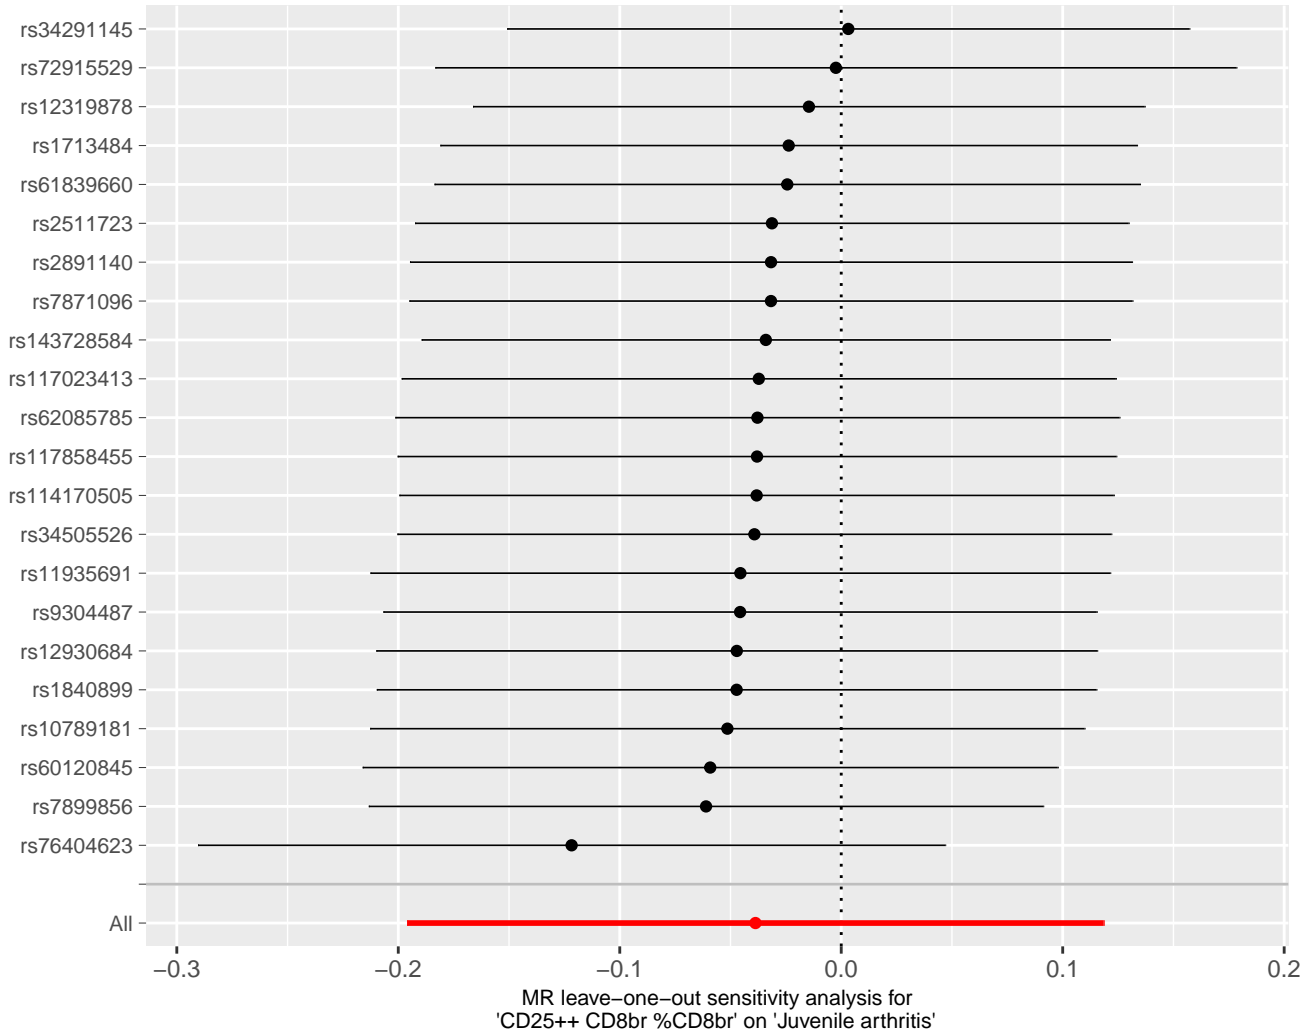

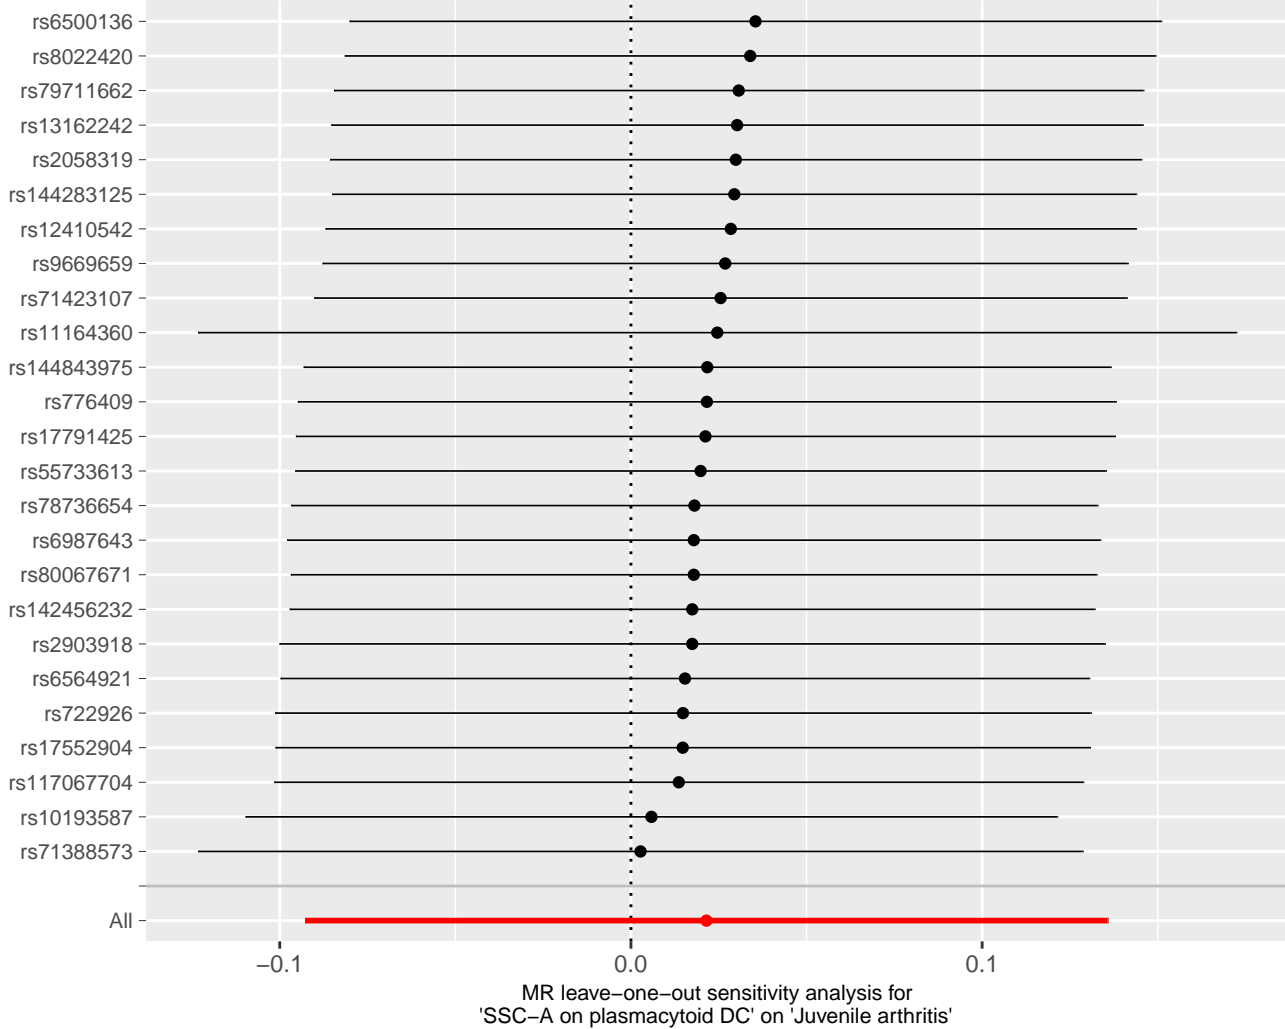

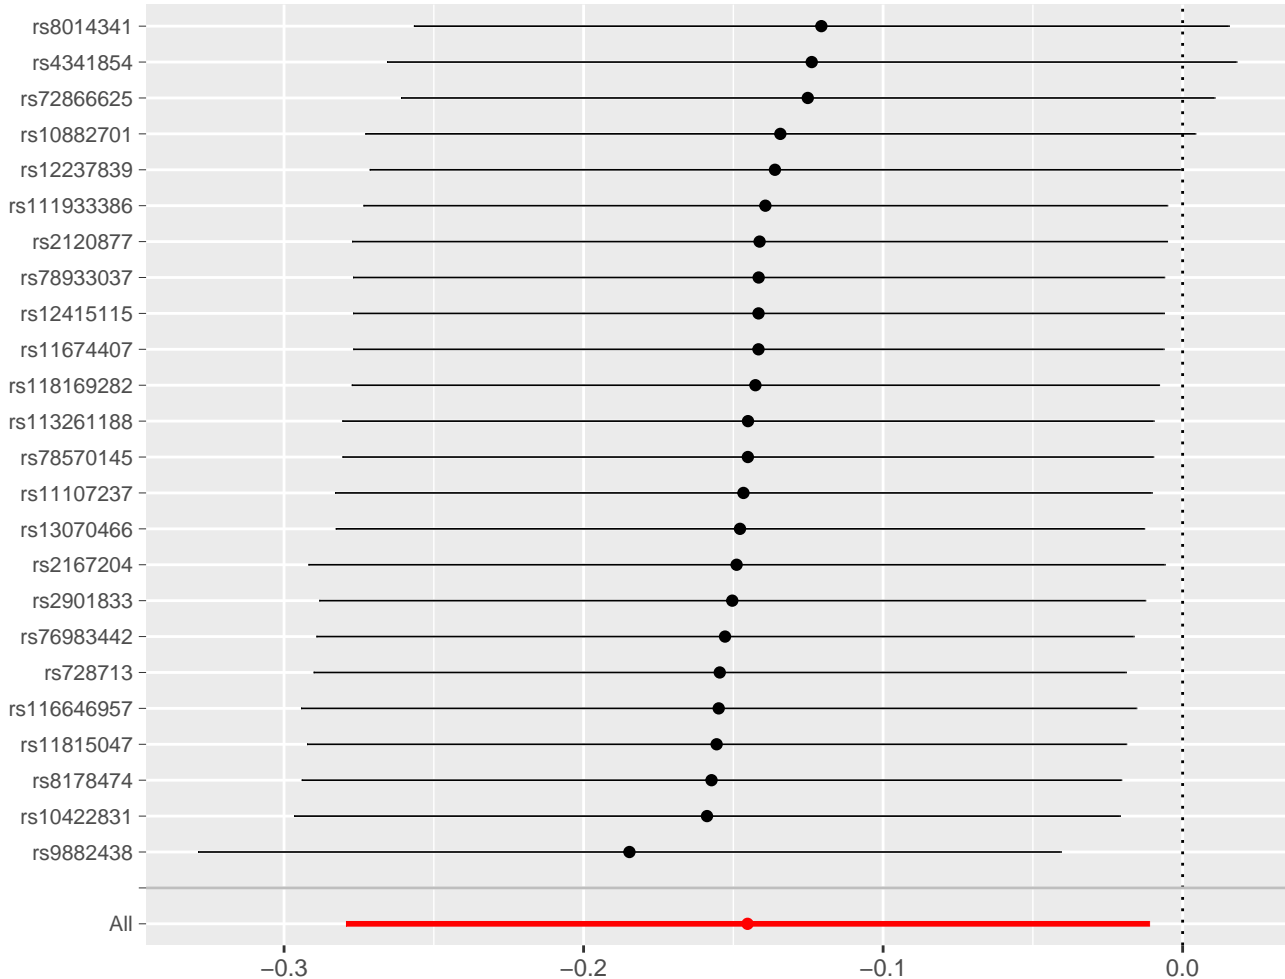

MR leave-one-out sensitivity analysis for 'CD39 on CD39+ CD8br' on 'Juvenile arthritis'

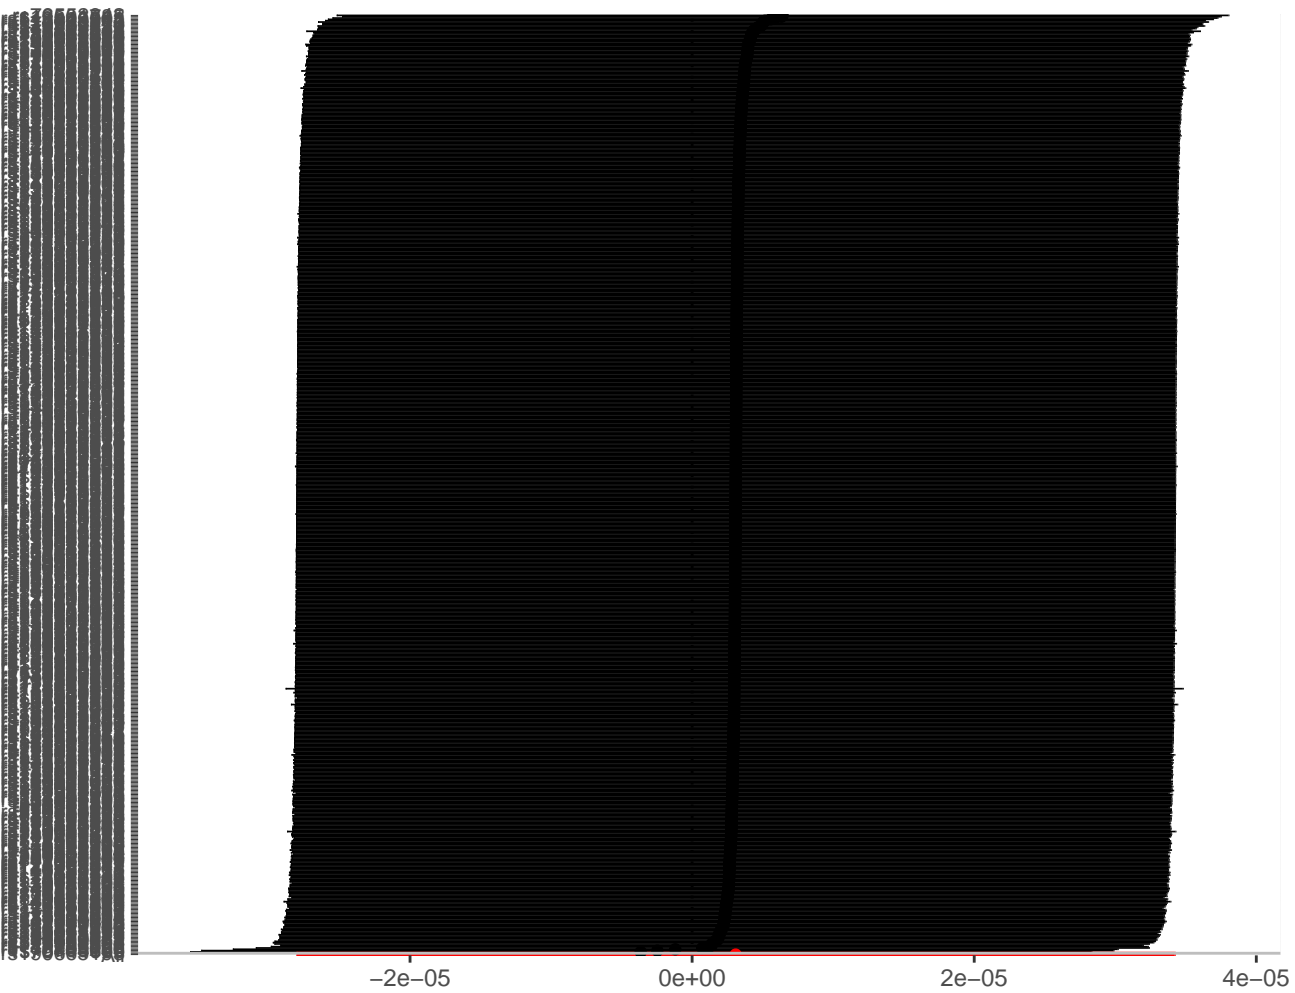

MR leave-one-out sensitivity analysis for  
'CD45RA+ CD28- CD8br AC' on 'Juvenile arthritis'

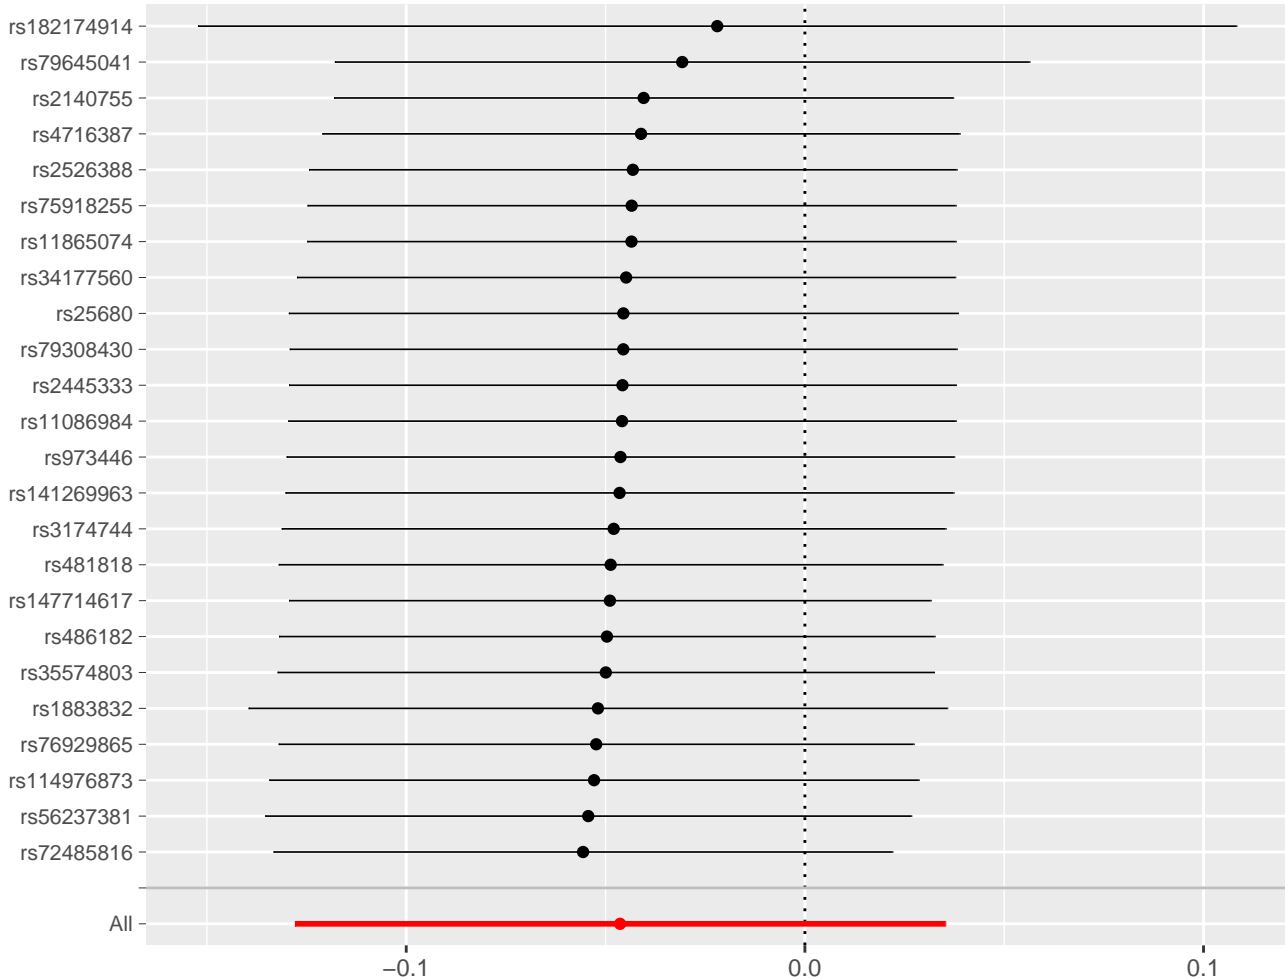

MR leave-one-out sensitivity analysis for 'CD27 on memory B cell' on 'Juvenile arthritis'



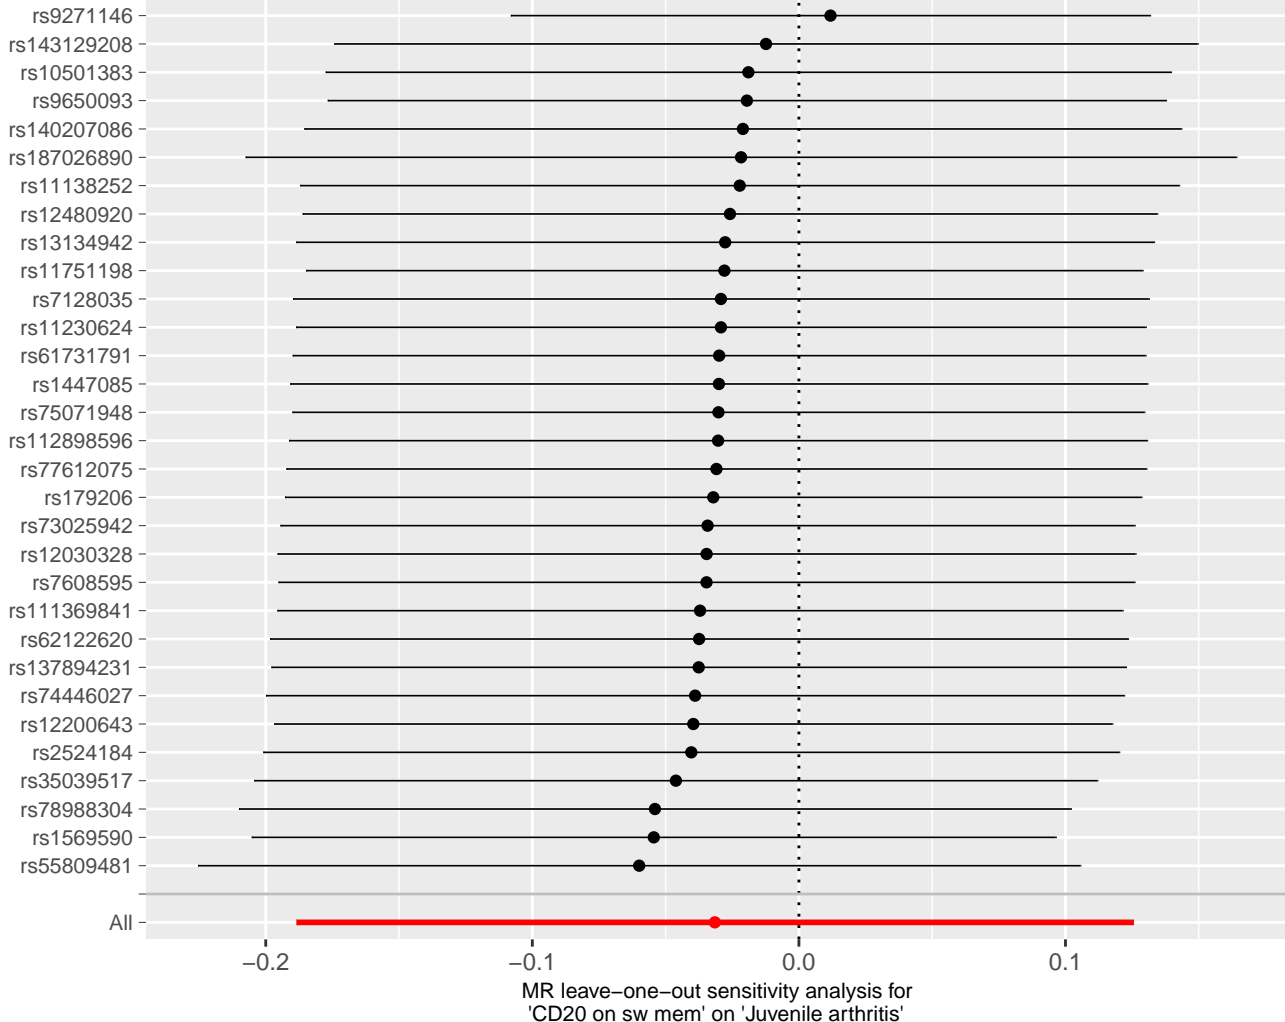

MR leave-one-out sensitivity analysis for 'CD20 on sw mem' on 'Juvenile arthritis'

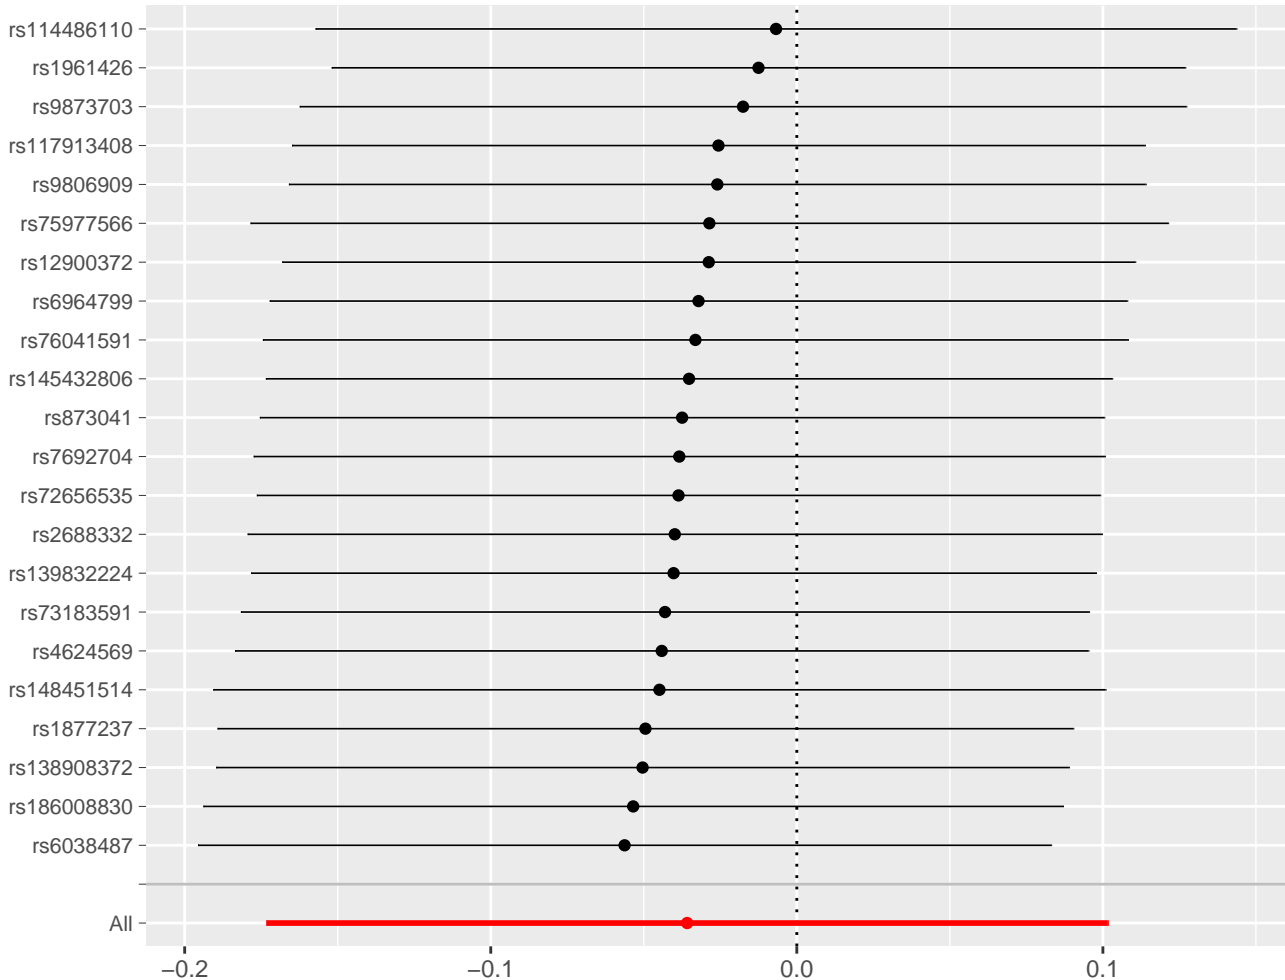

MR leave-one-out sensitivity analysis for 'CD127 on CD28+ DN (CD4-CD8-)' on 'Juvenile arthritis'

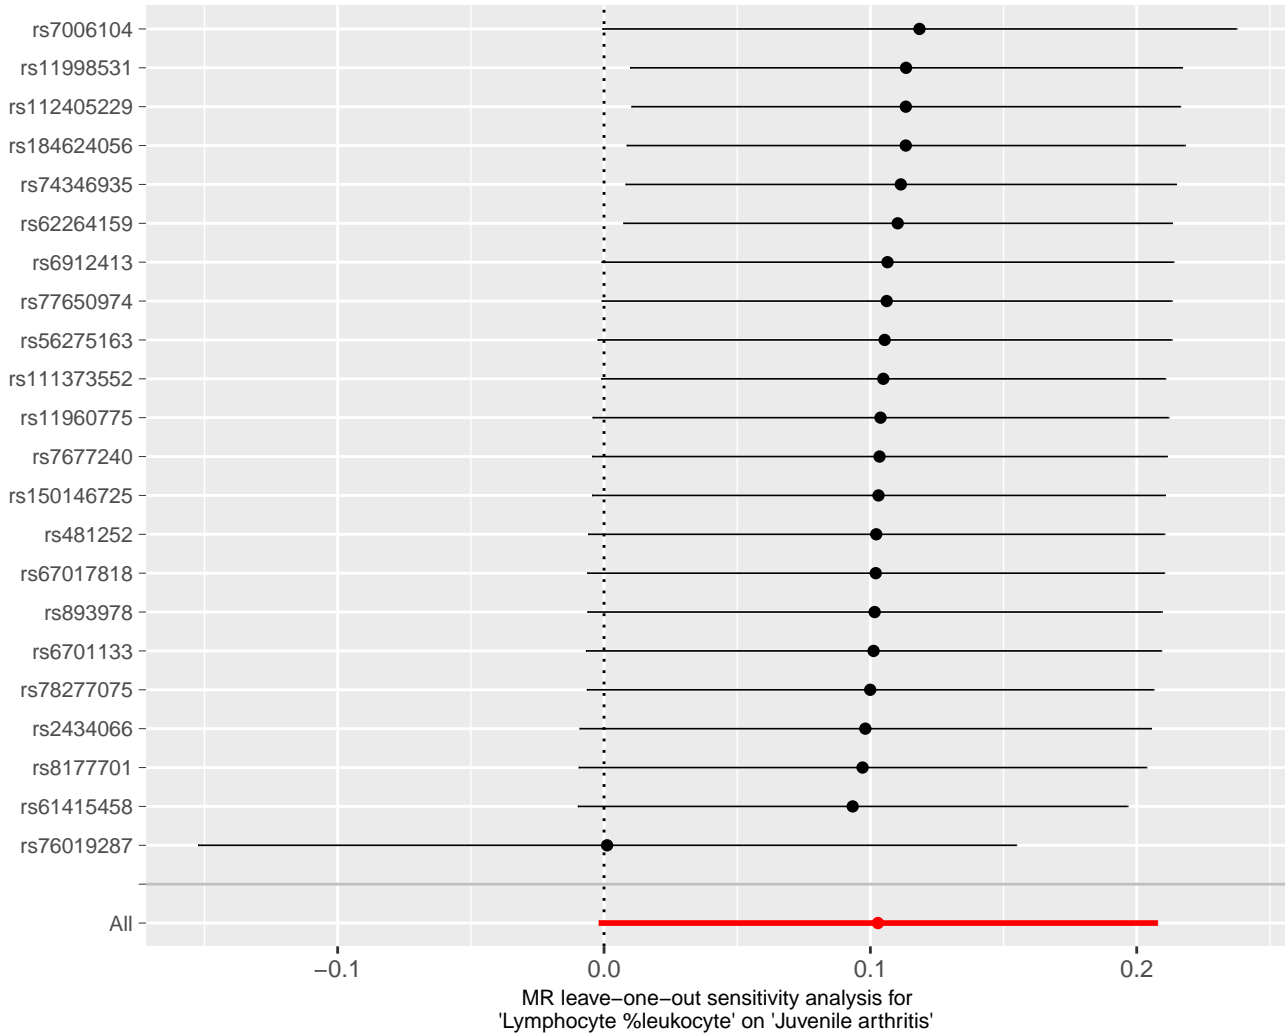

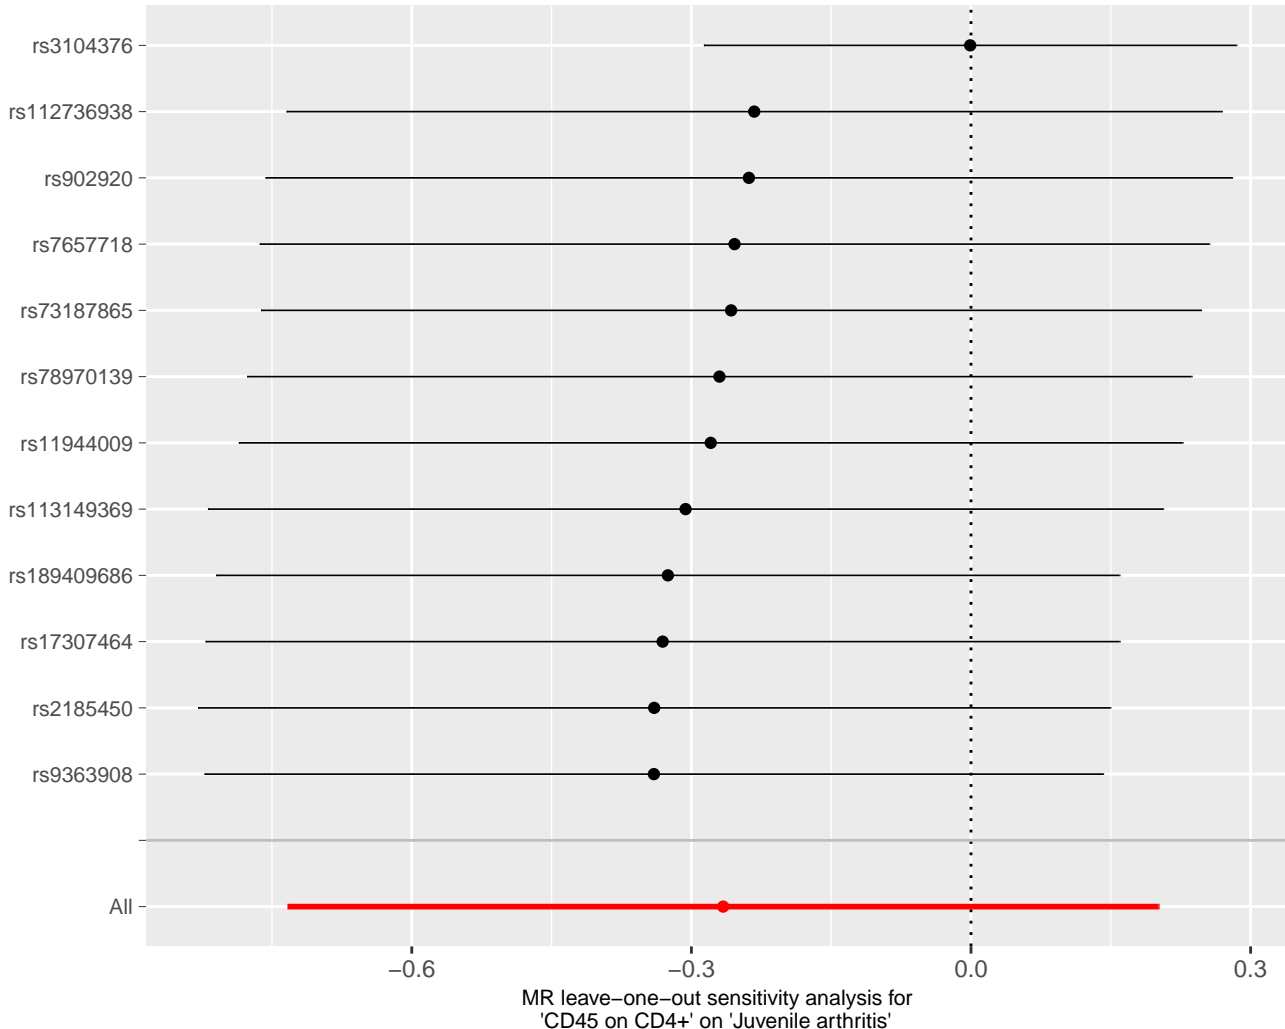

MR leave-one-out sensitivity analysis for 'CD45 on CD4+' on 'Juvenile arthritis'

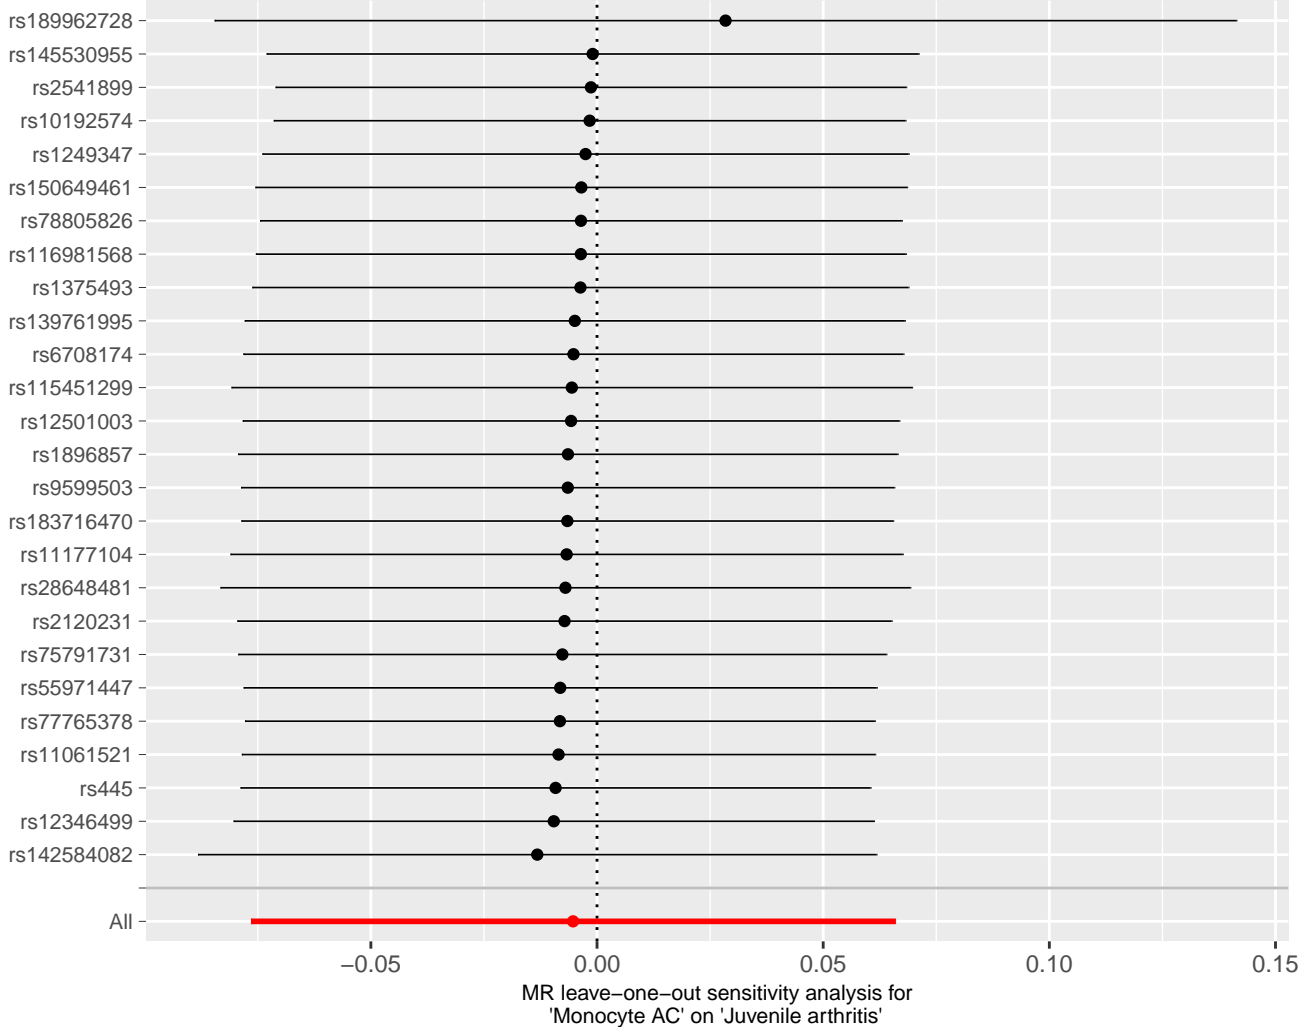

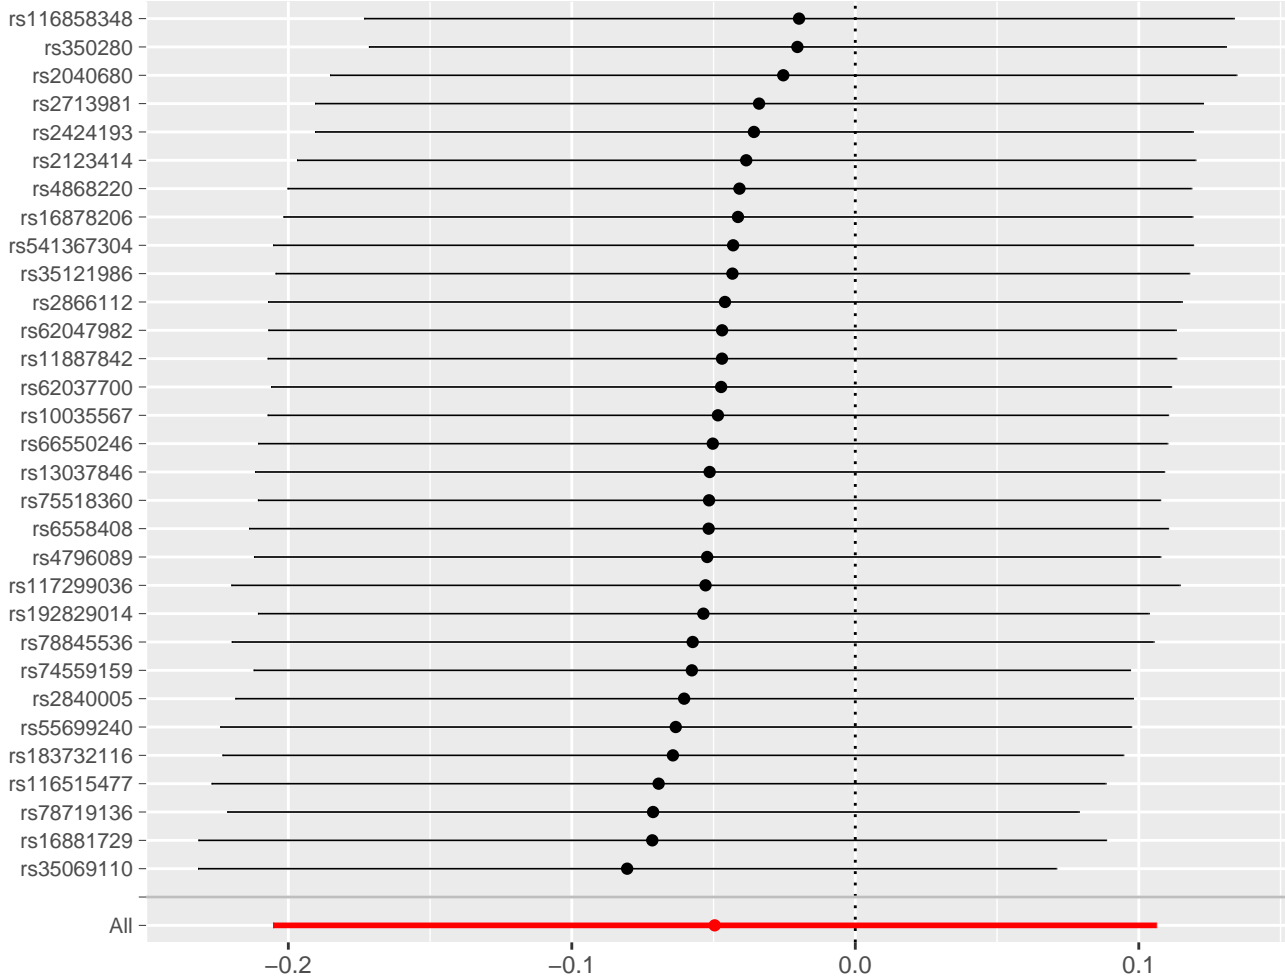

MR leave-one-out sensitivity analysis for 'CM CD8br %CD8br' on 'Juvenile arthritis'

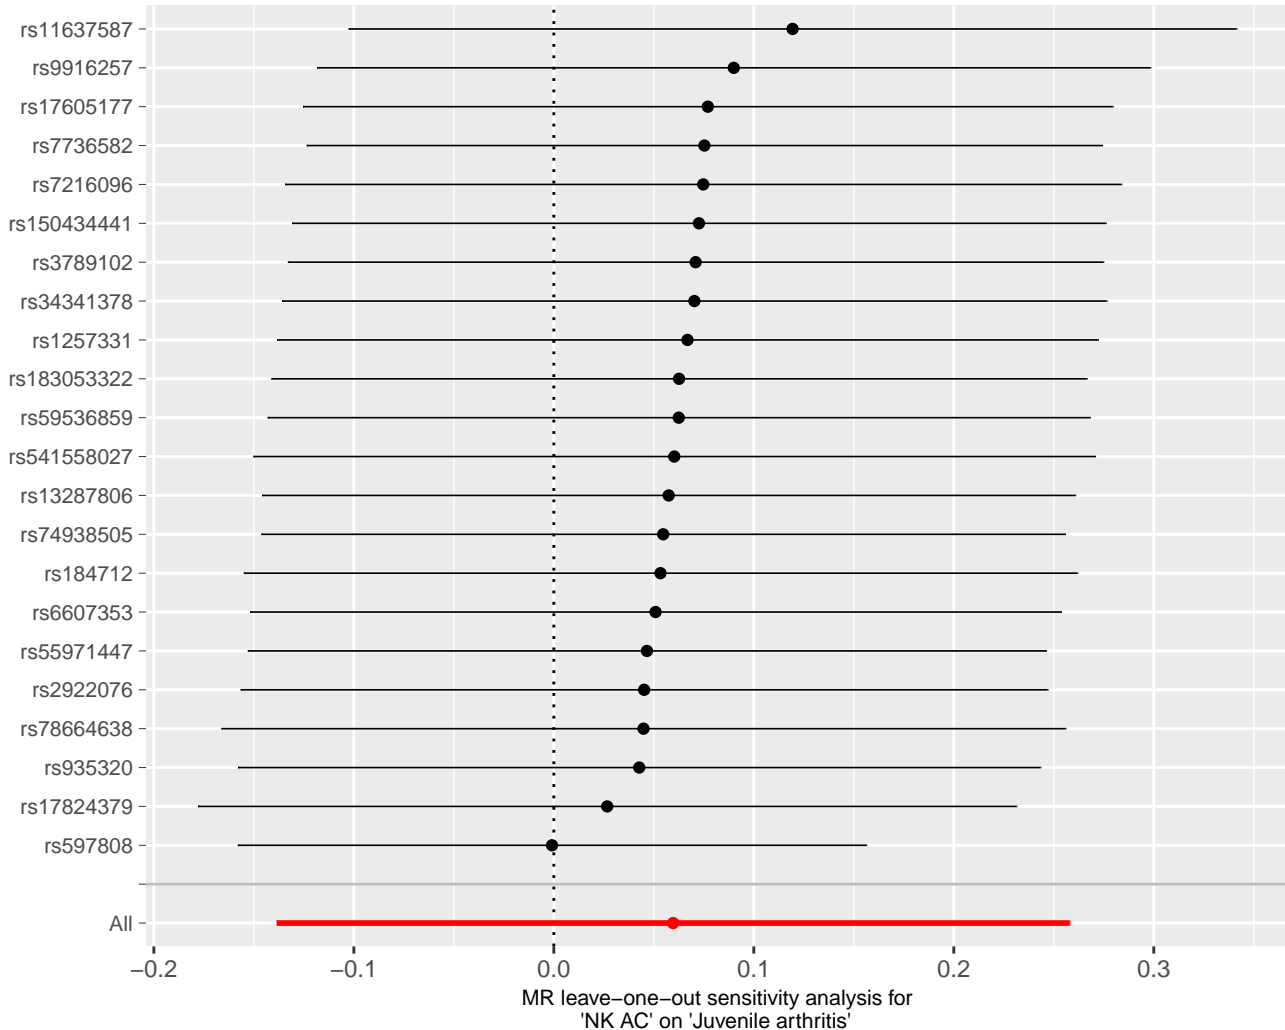

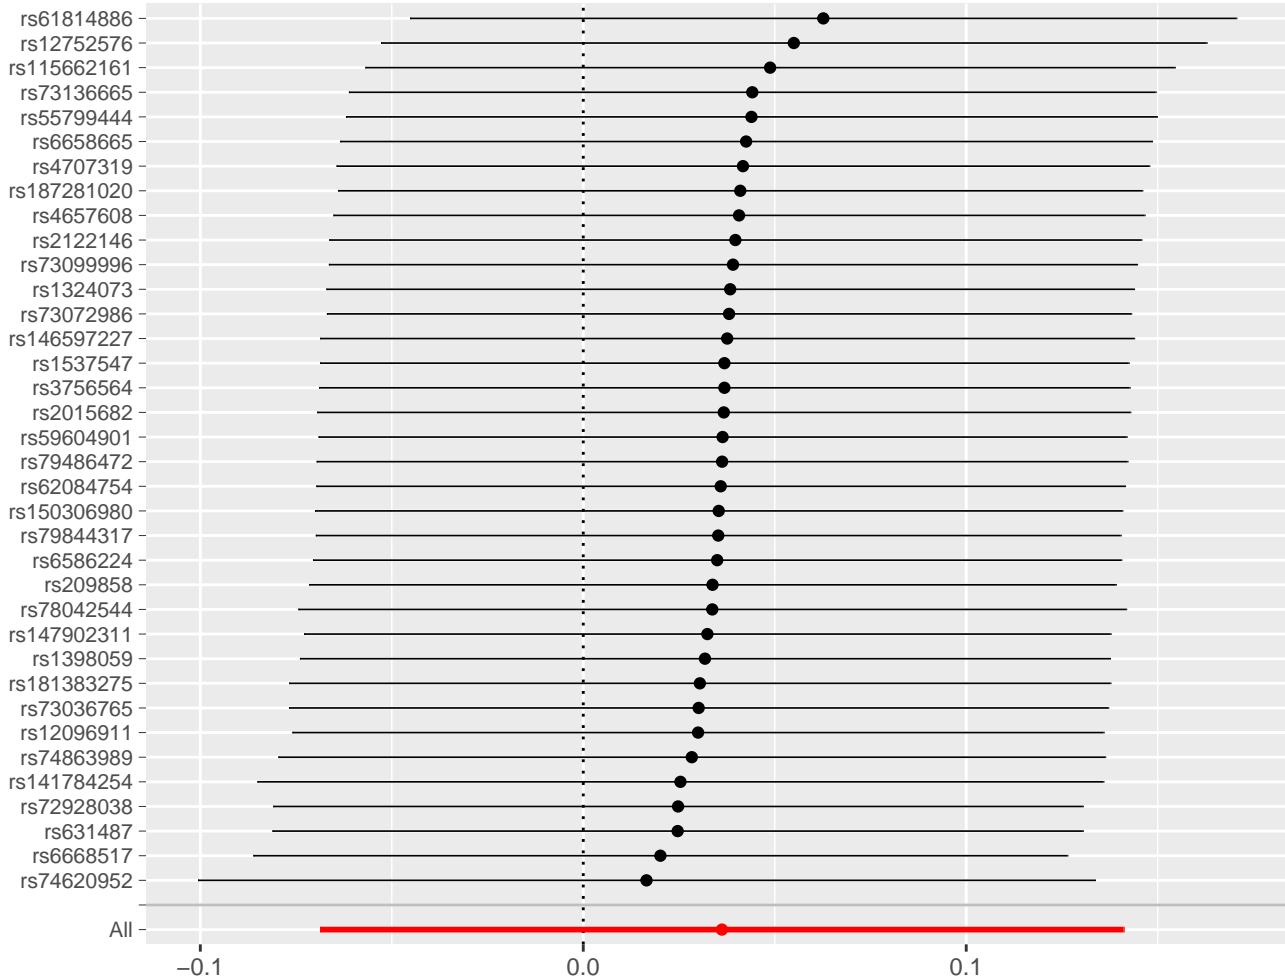

MR leave-one-out sensitivity analysis for 'CD3 on resting Treg' on 'Juvenile arthritis'



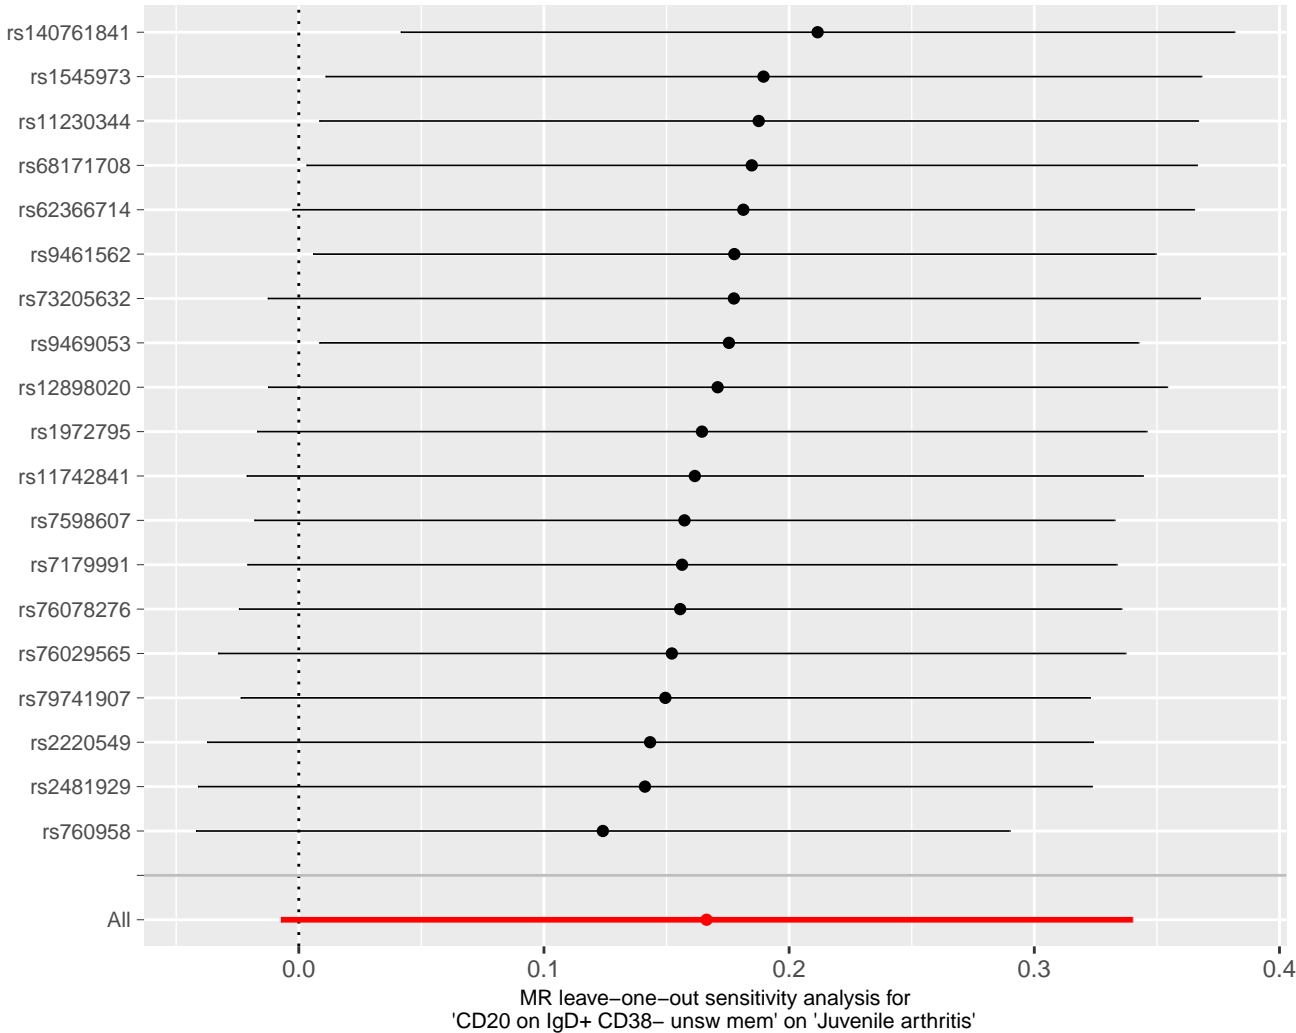

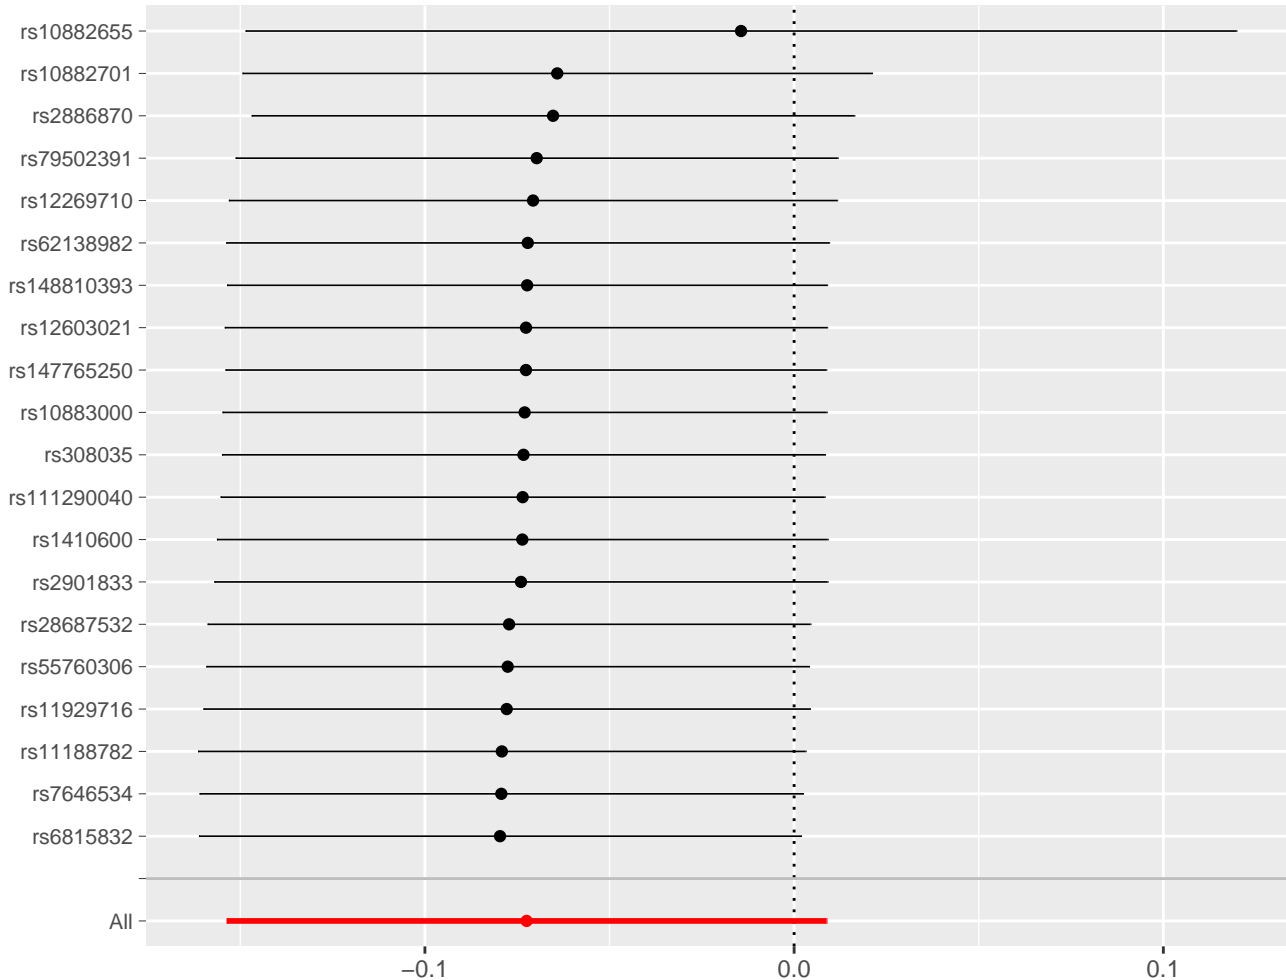

MR leave-one-out sensitivity analysis for 'CD39 on CD39+ CD4+ ' on 'Juvenile arthritis'

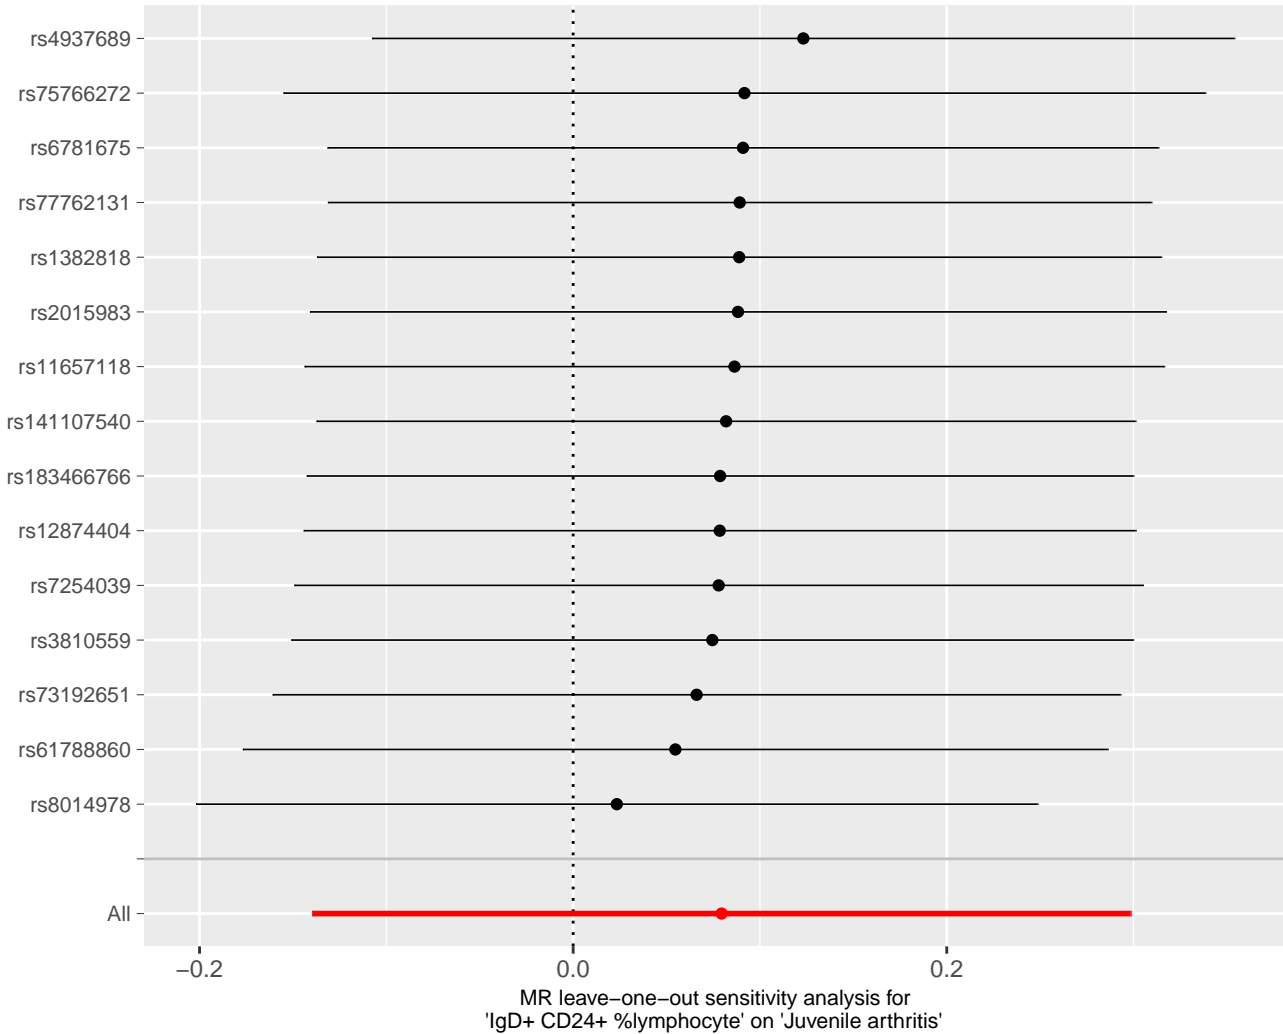

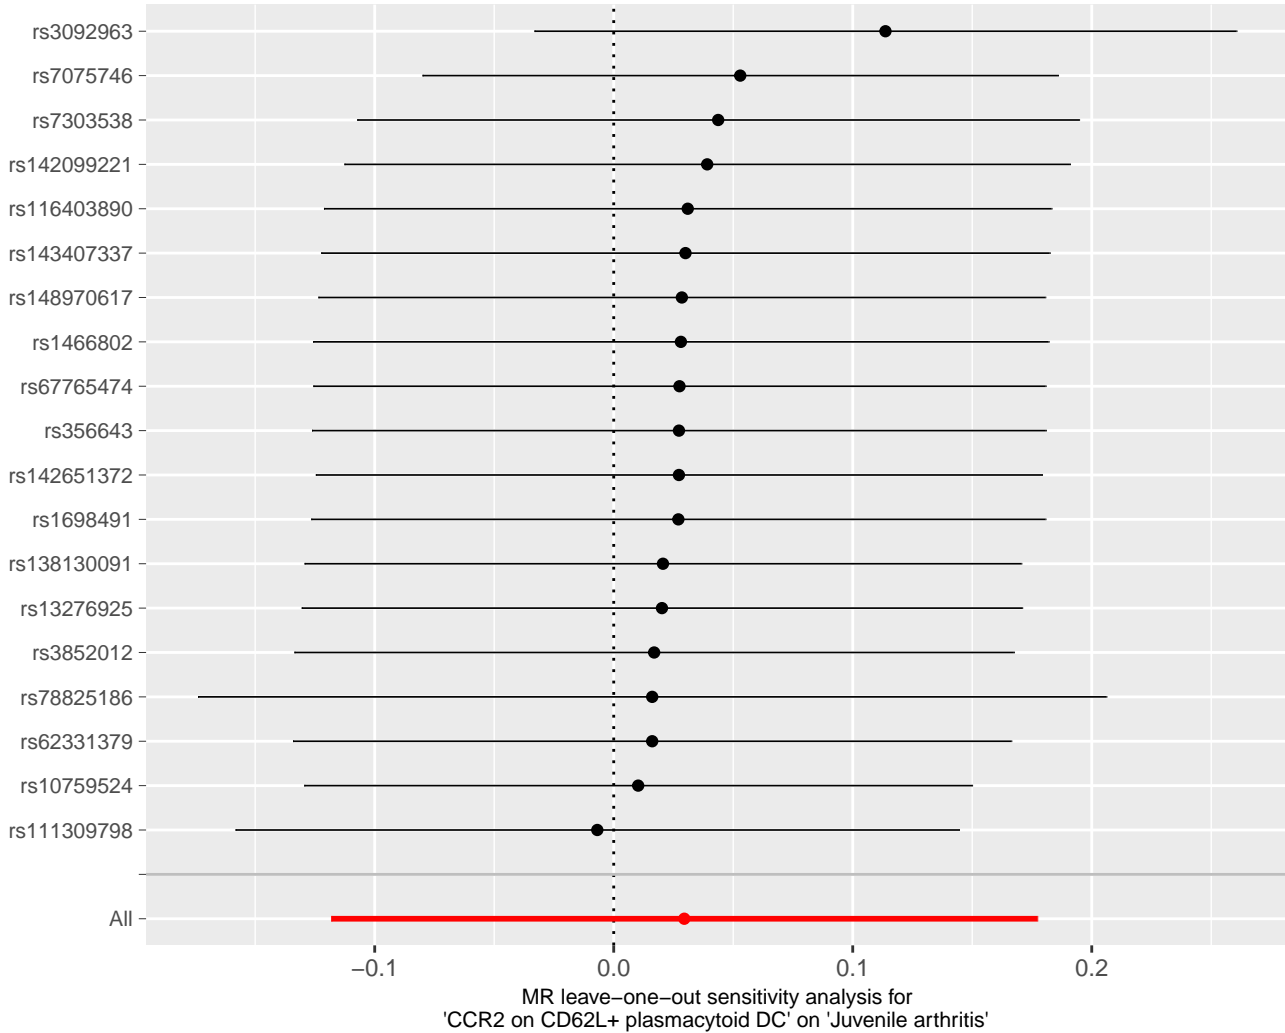

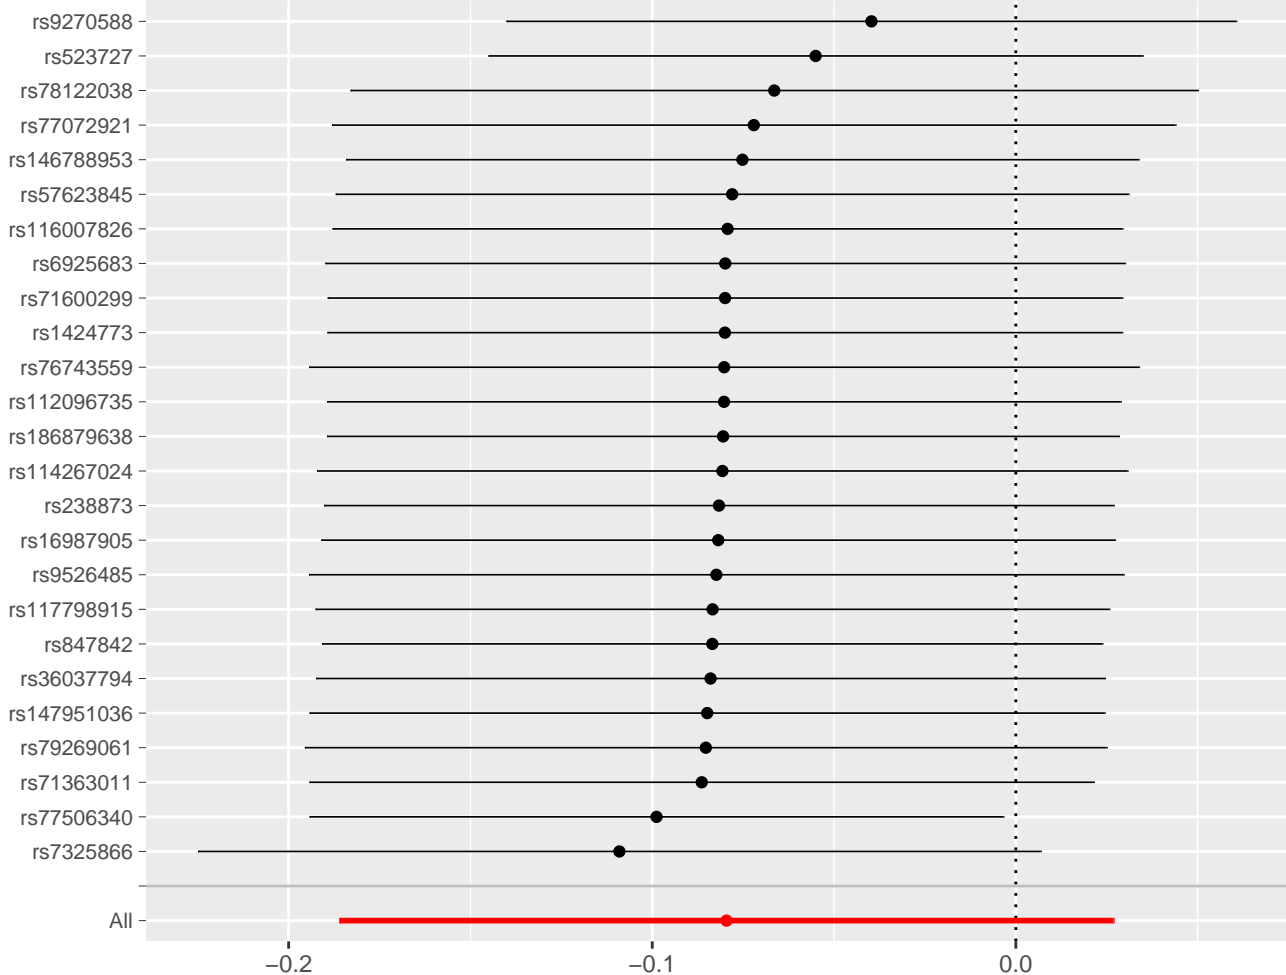

MR leave-one-out sensitivity analysis for 'HLA DR on CD33br HLA DR+ CD14-' on 'Juvenile arthritis'

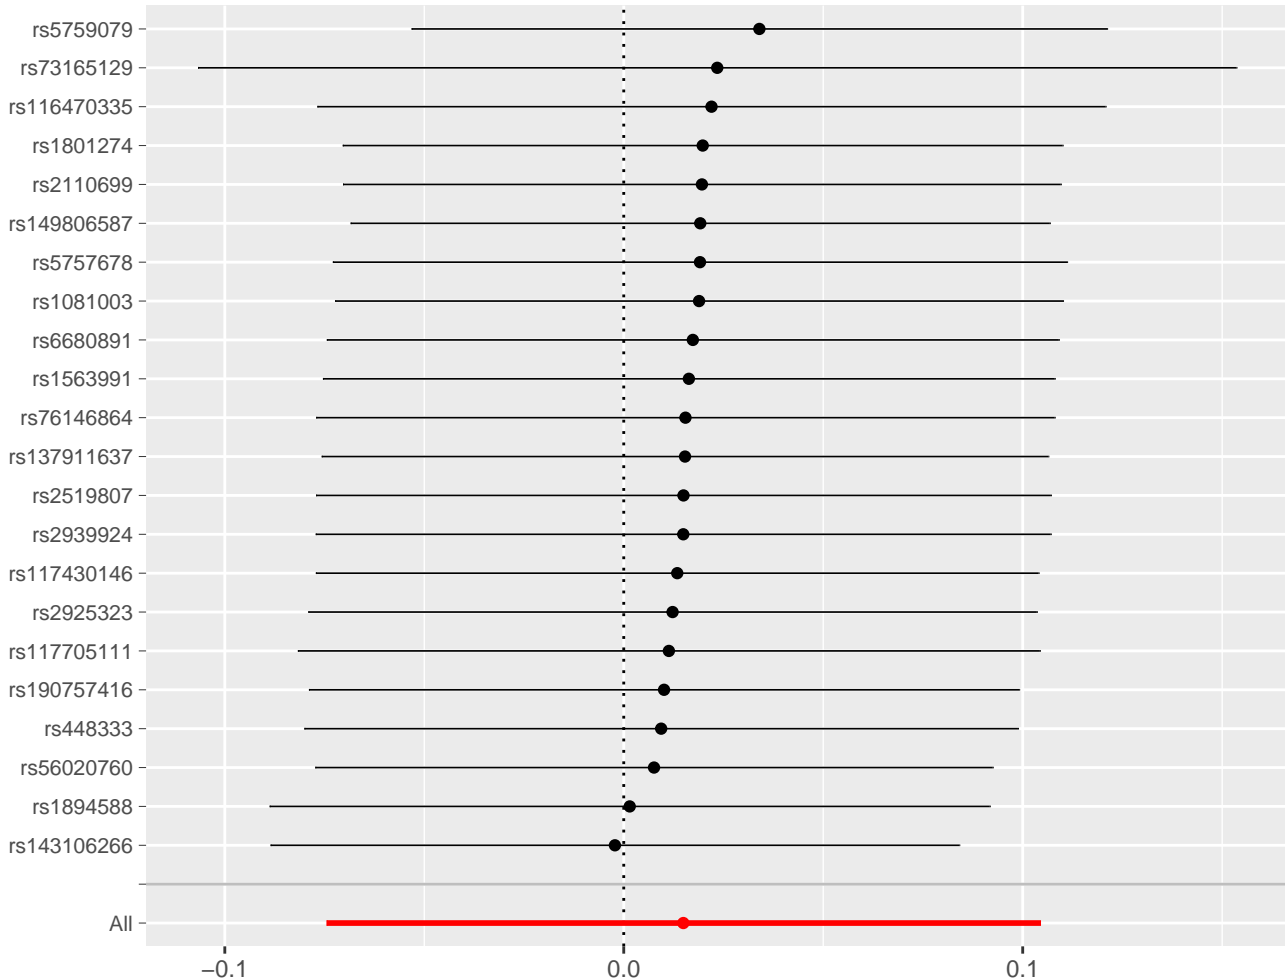

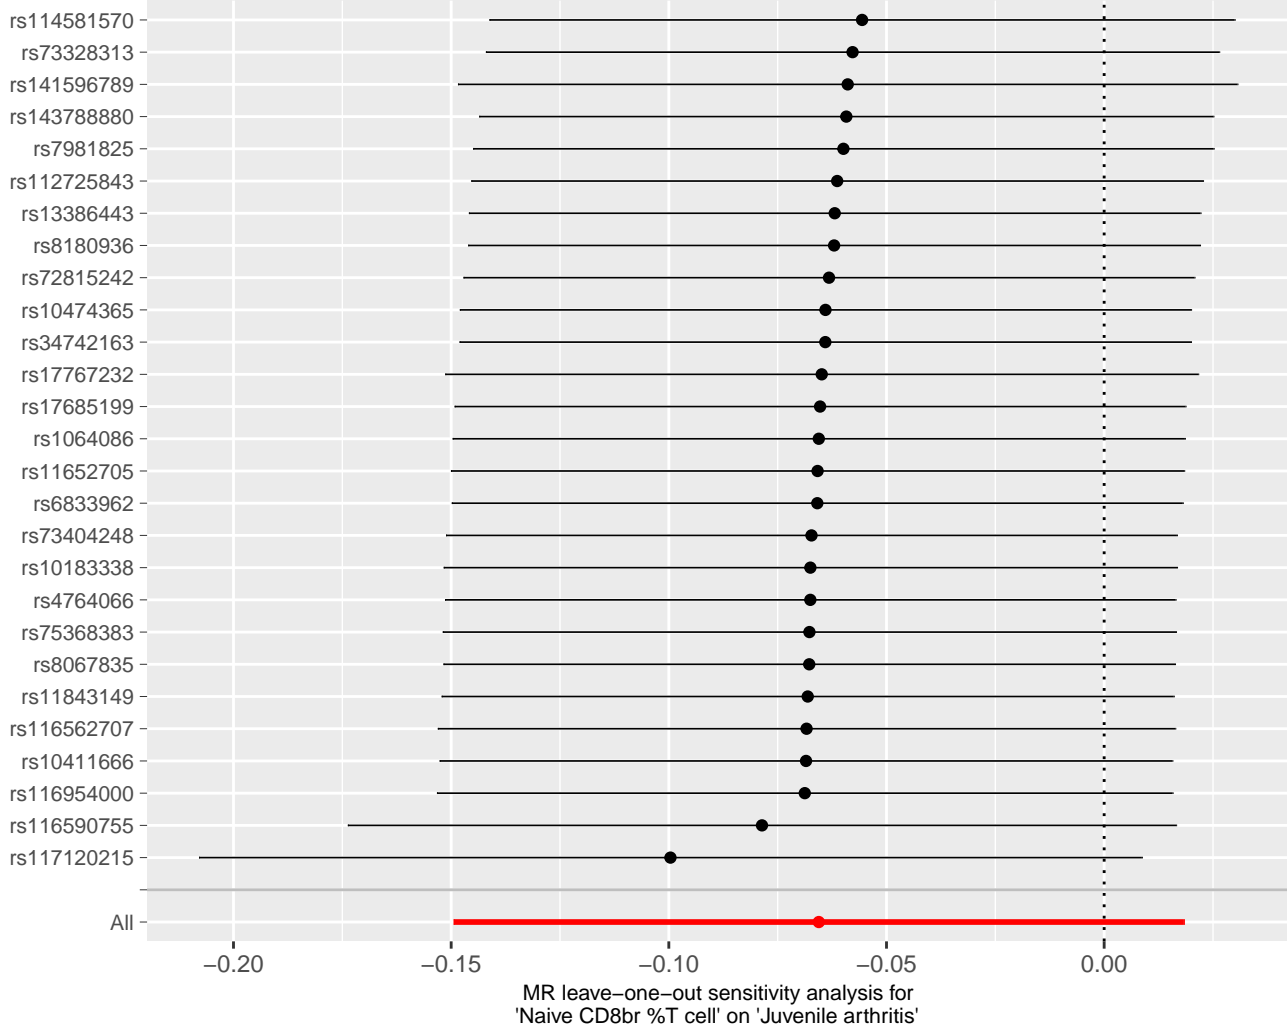

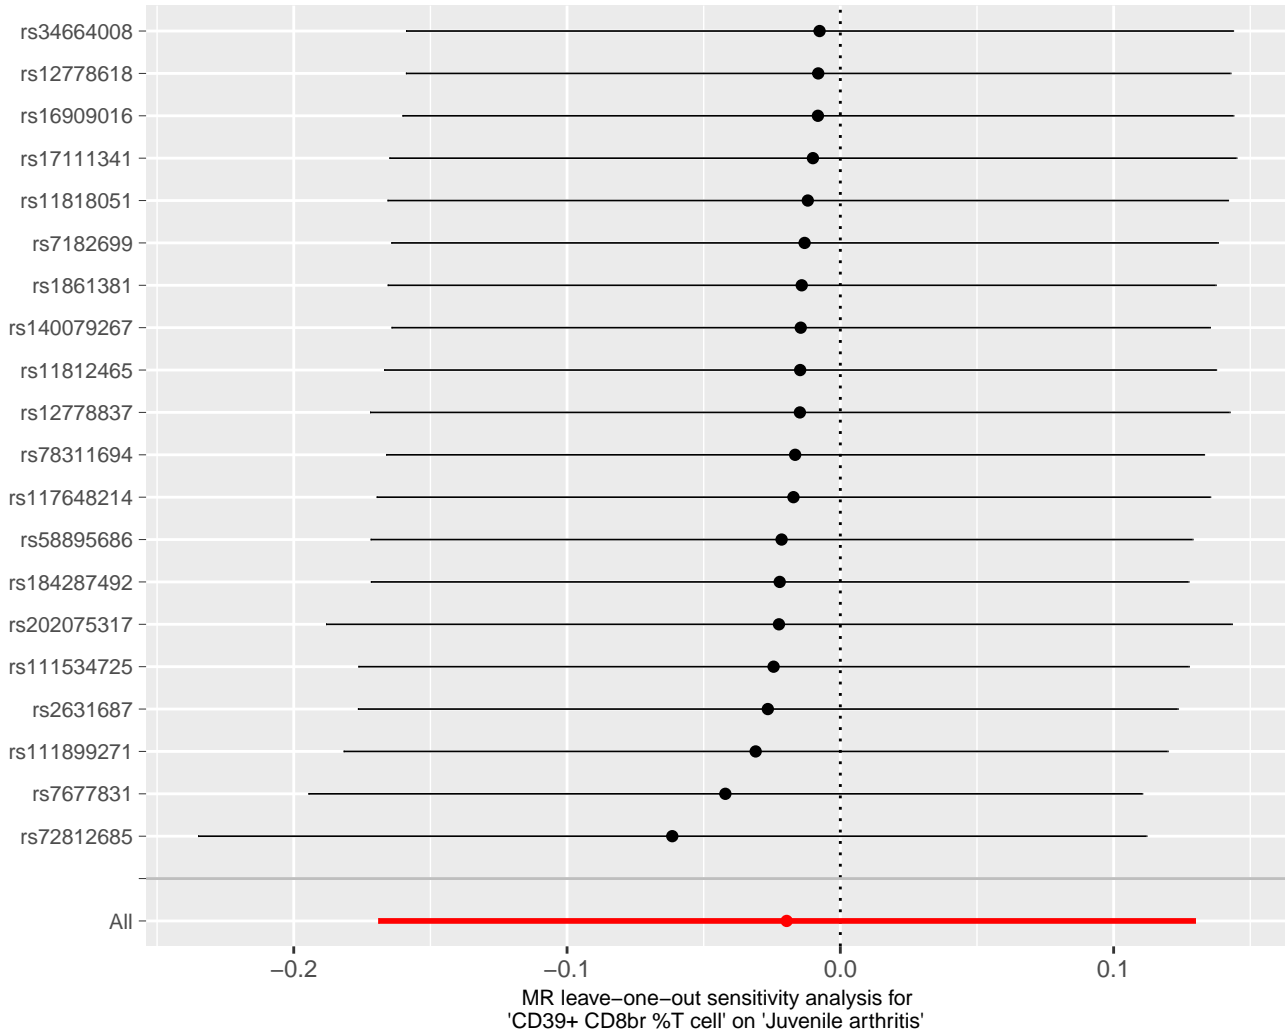



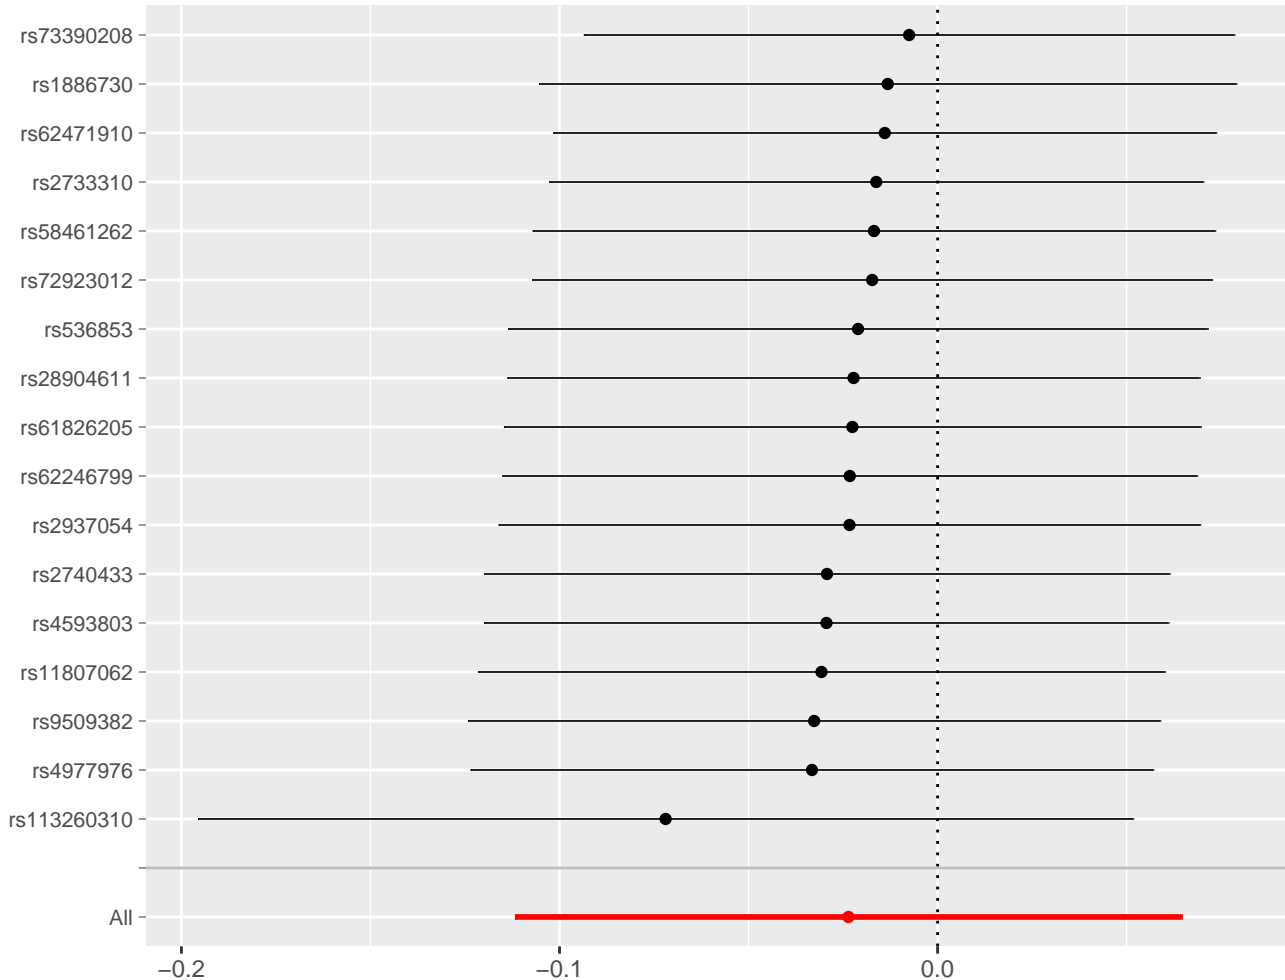

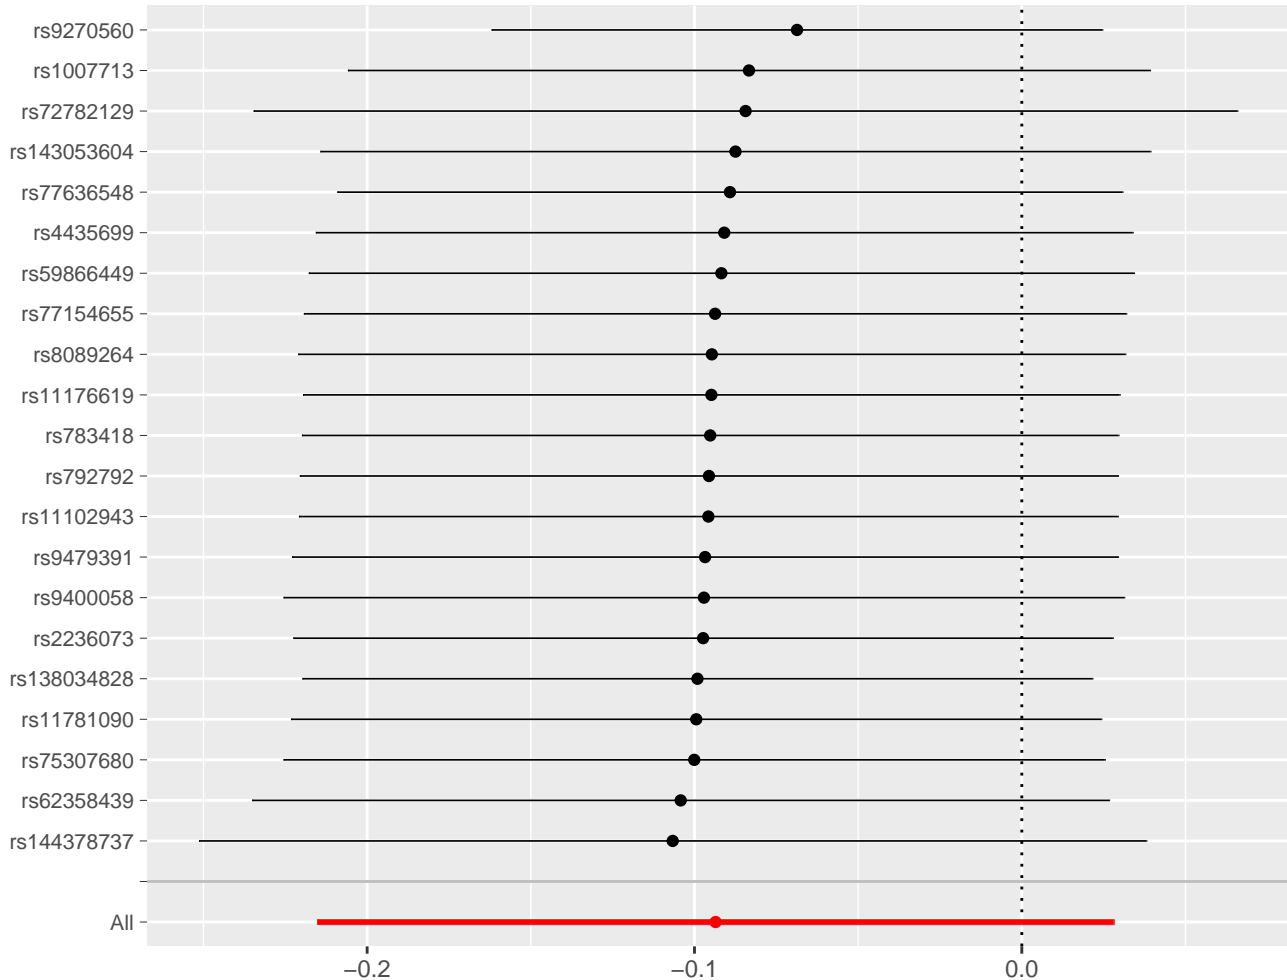

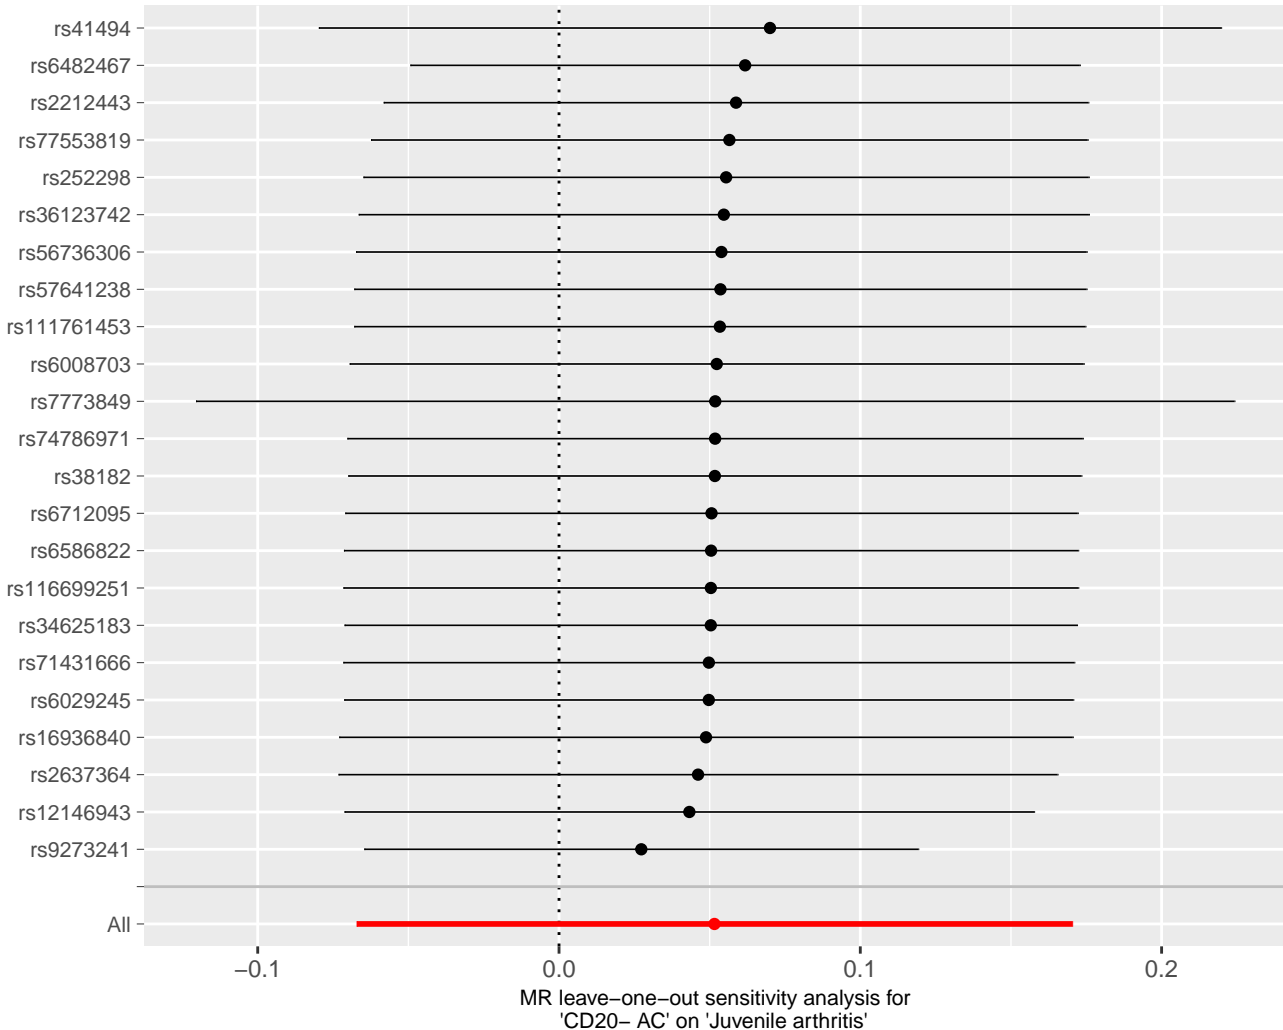

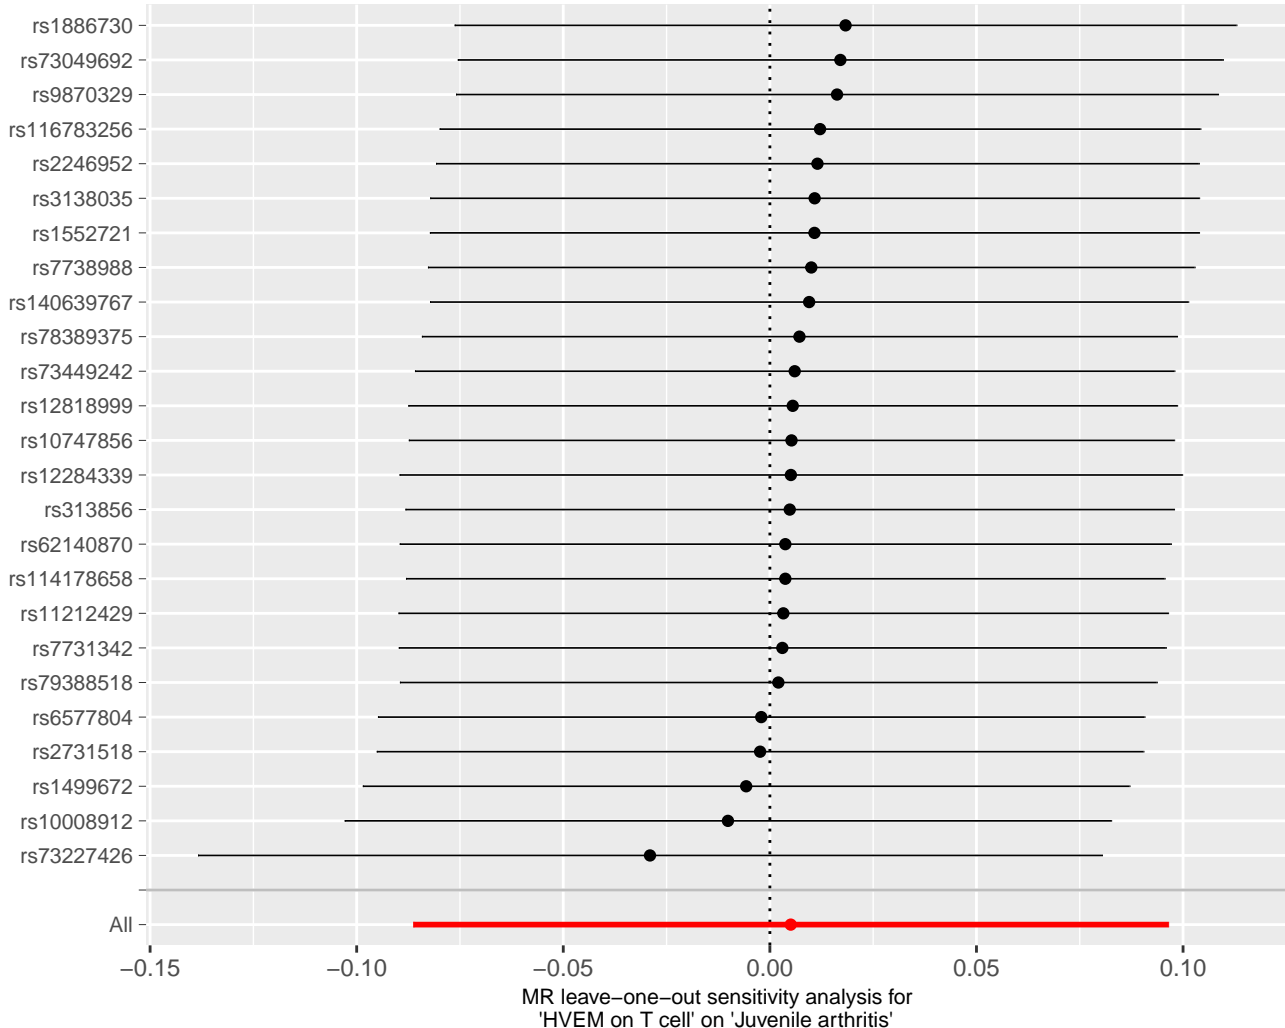

MR leave-one-out sensitivity analysis for 'HVEM on T cell' on 'Juvenile arthritis'

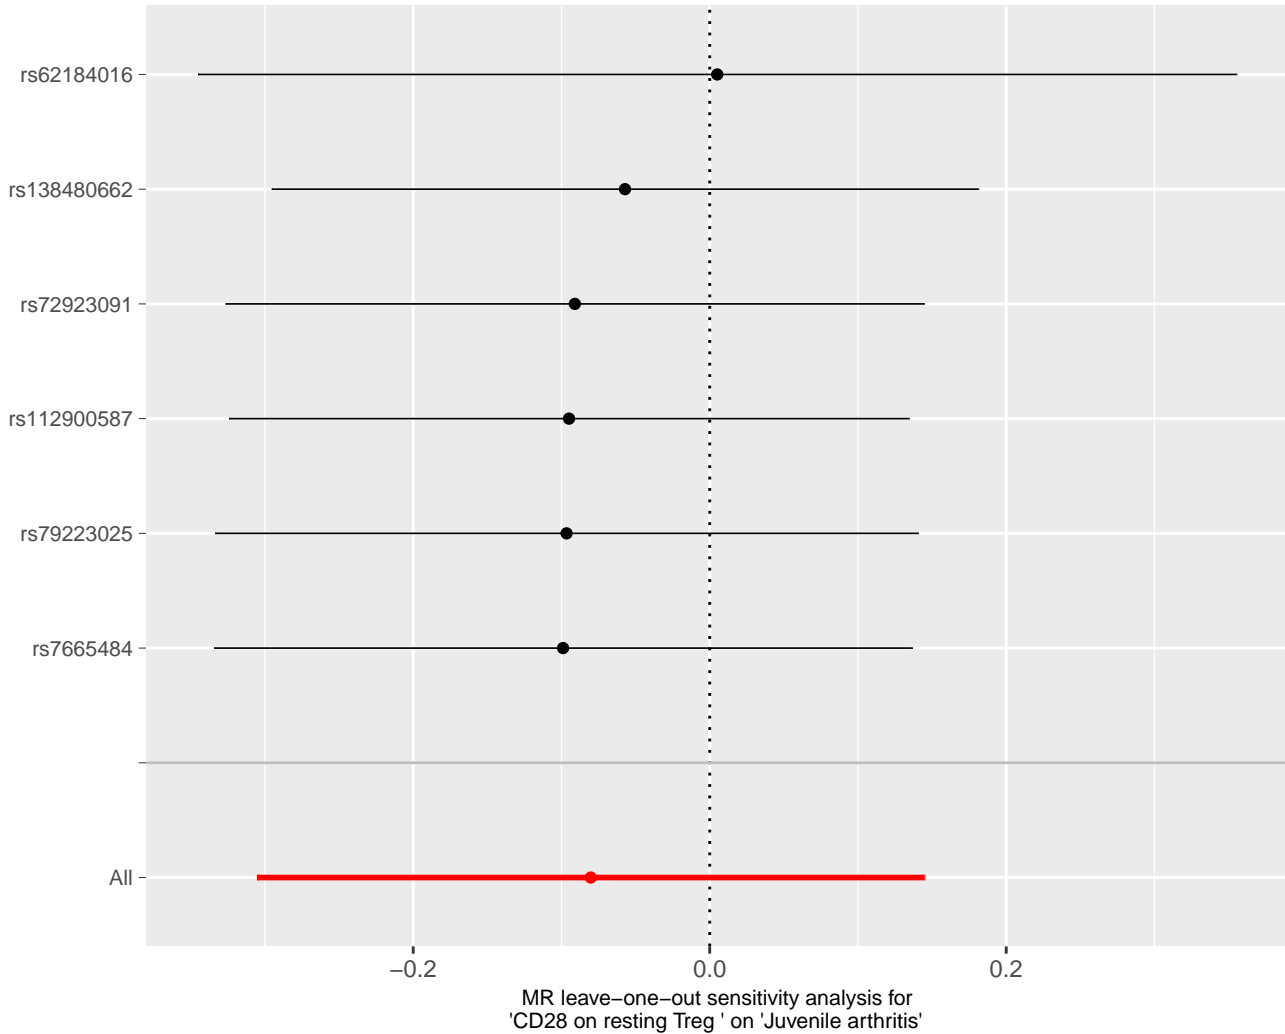

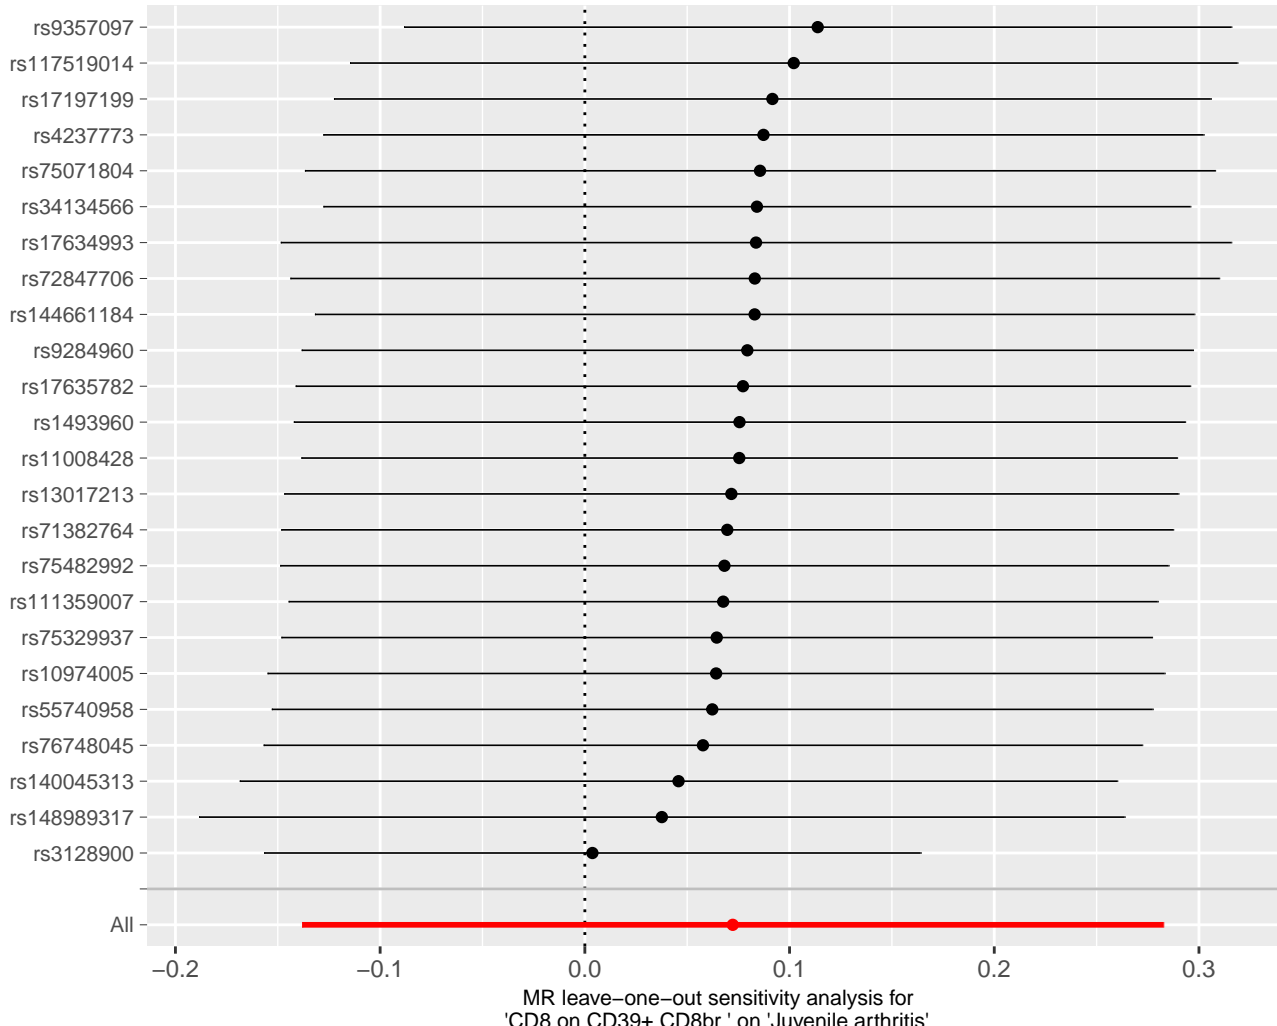

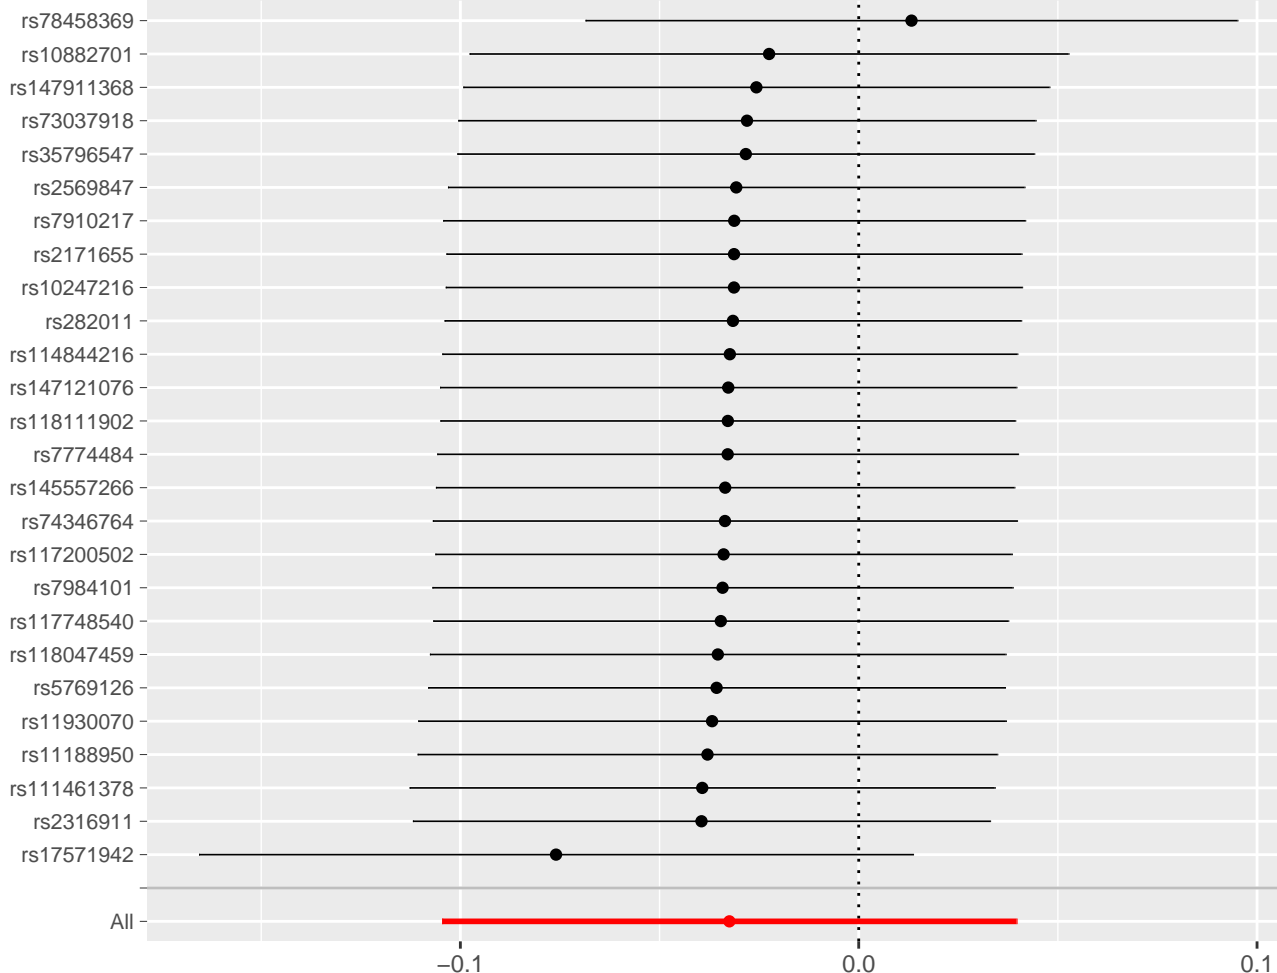

MR leave-one-out sensitivity analysis for 'CD39+ secreting Treg %secreting Treg' on 'Juvenile arthritis'

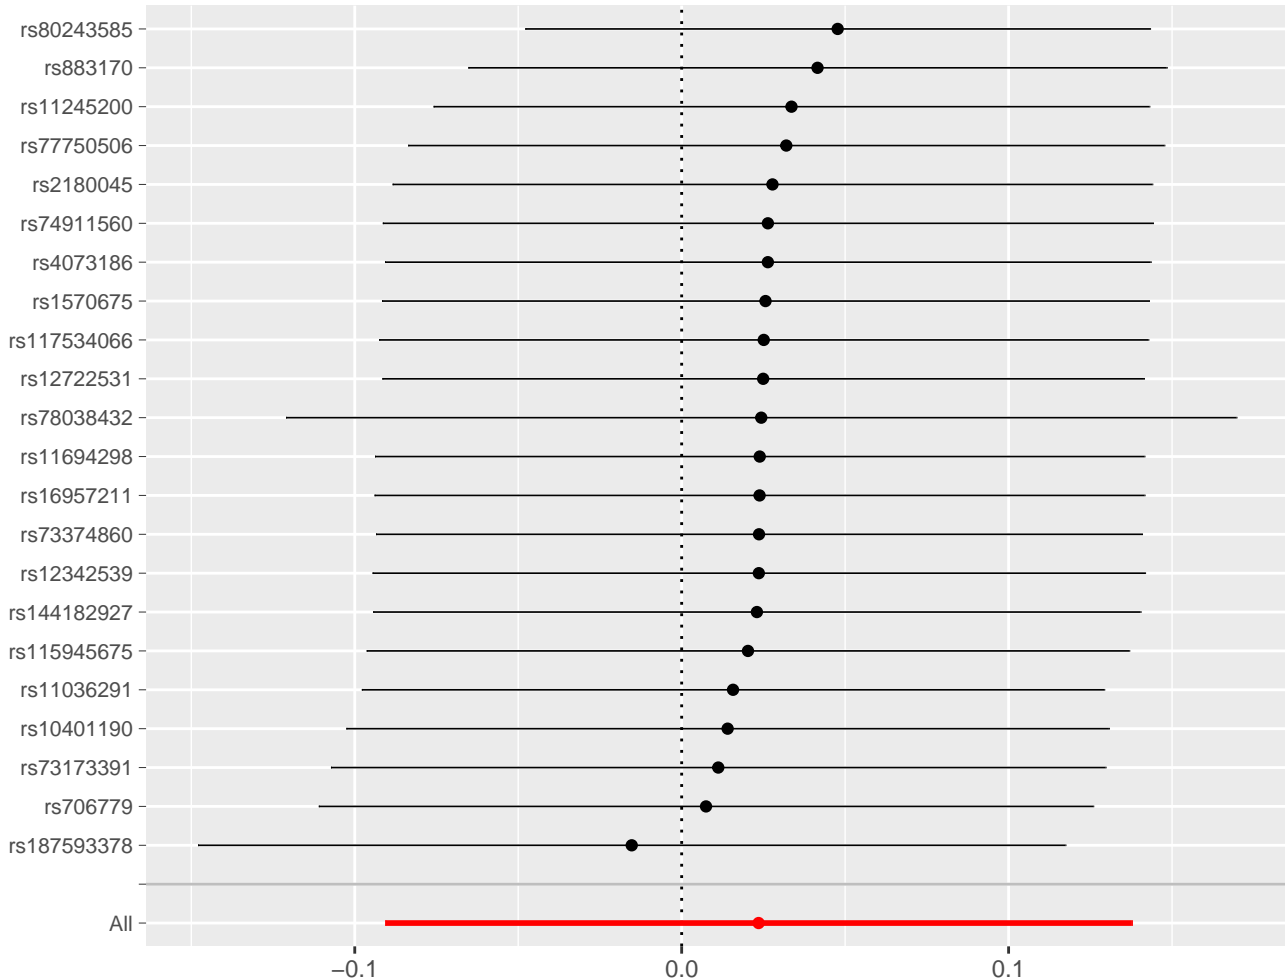



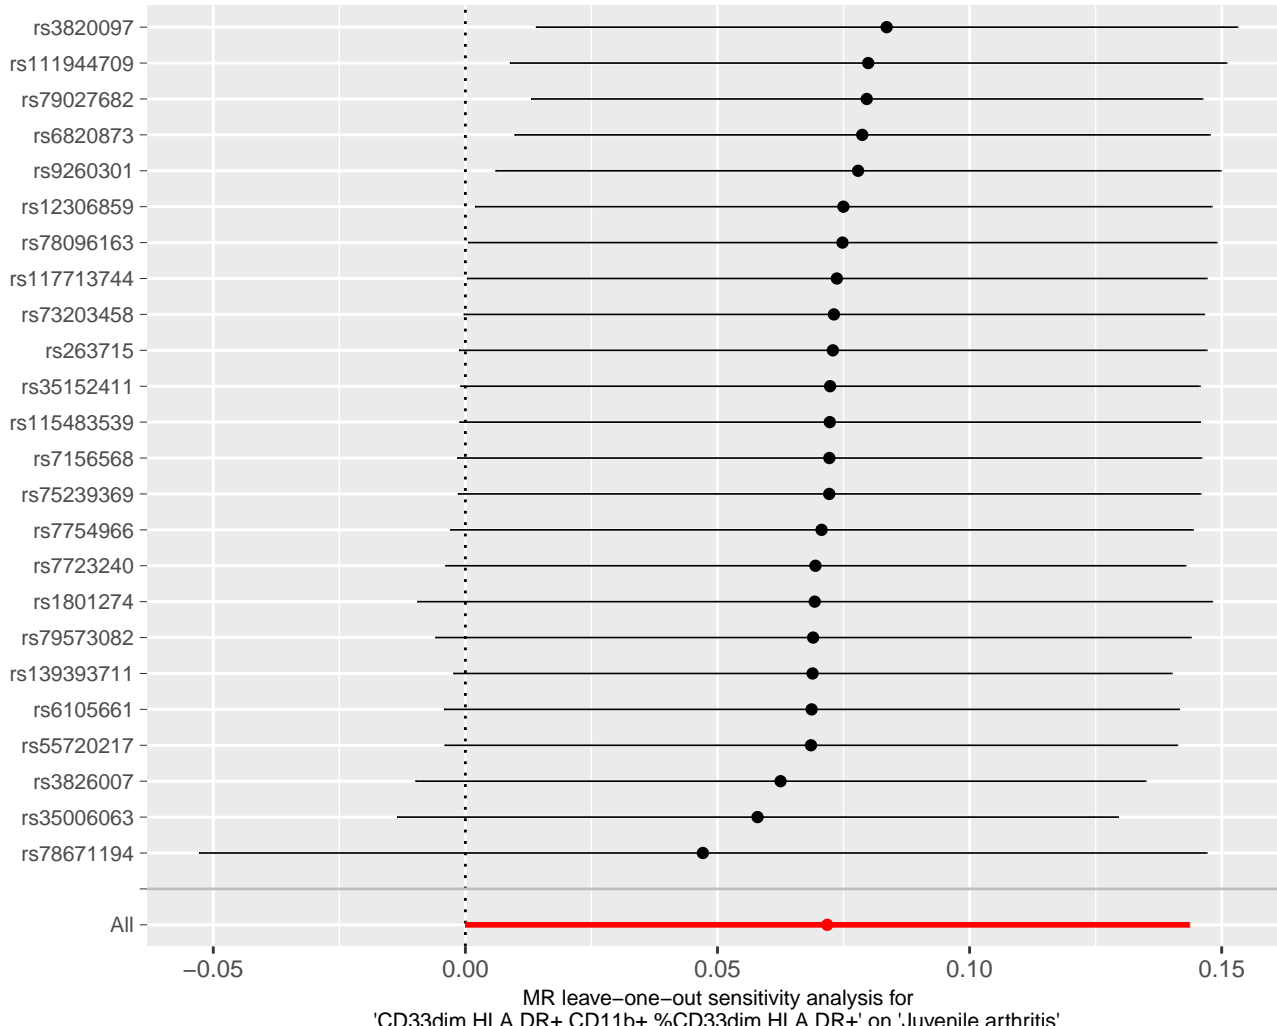

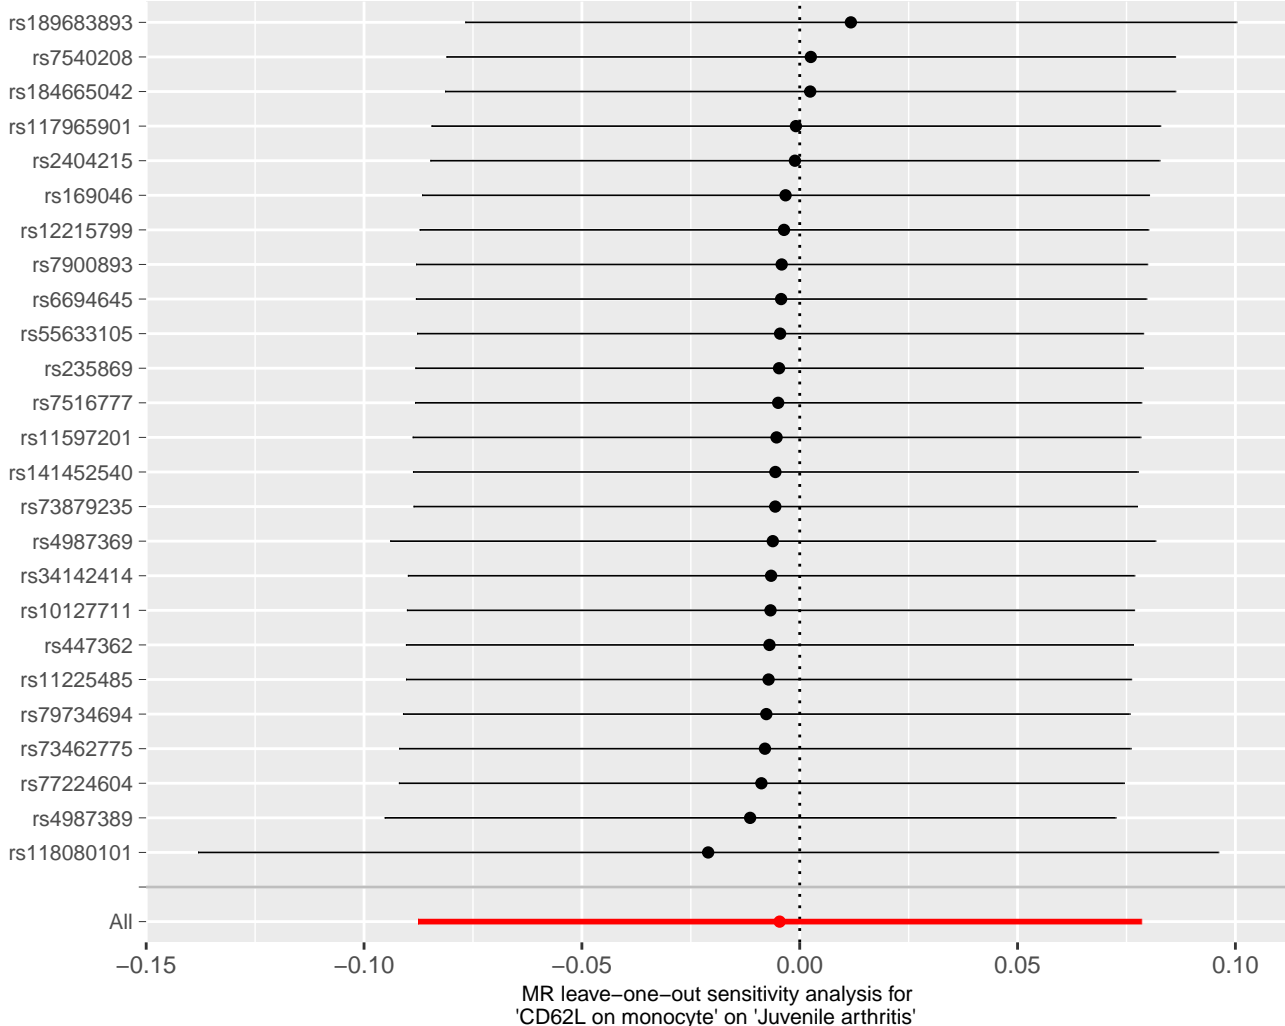

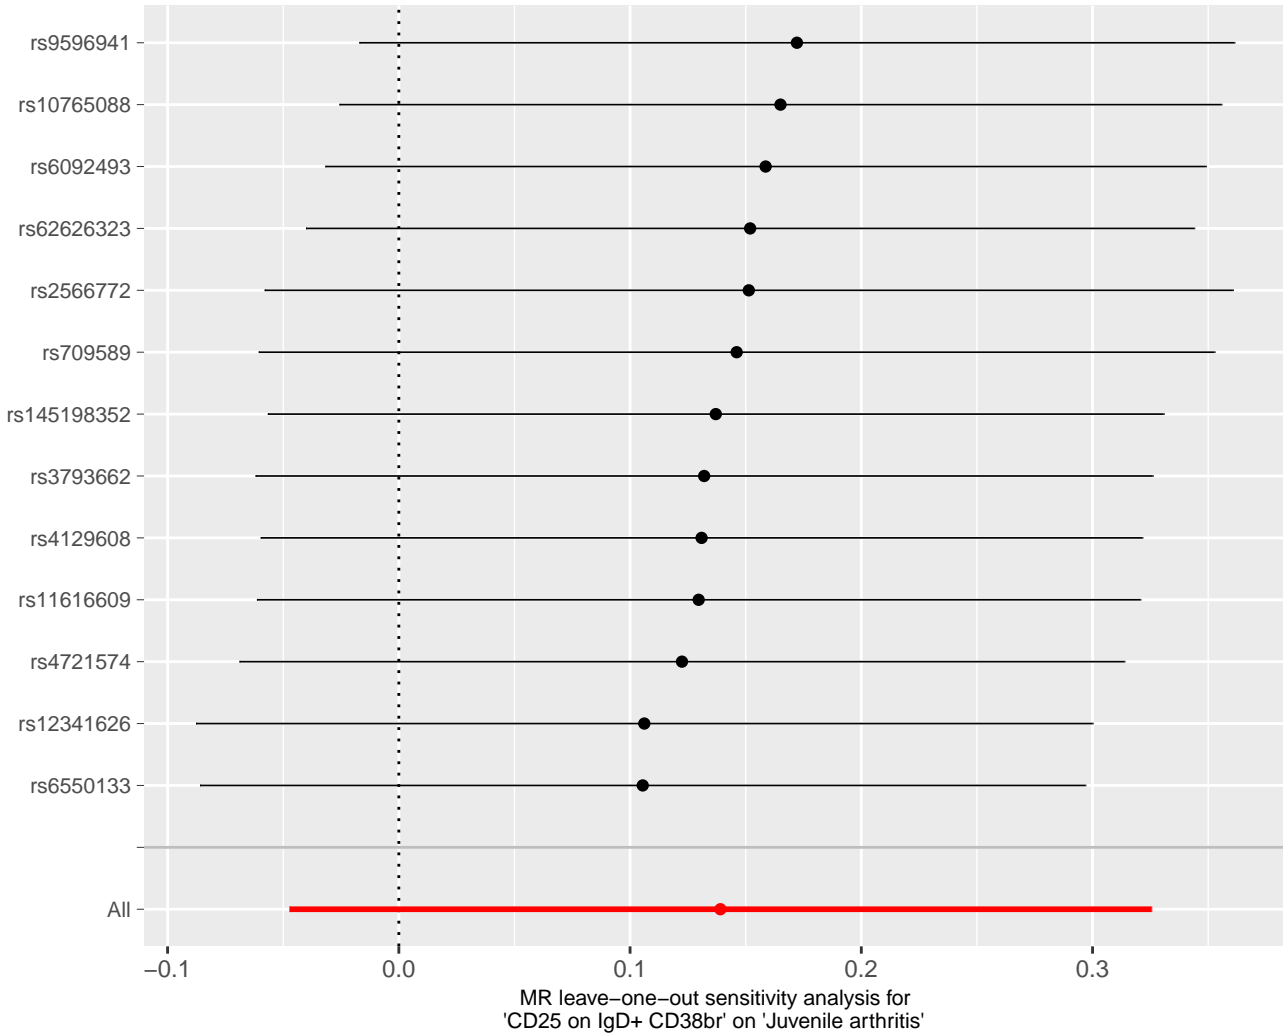

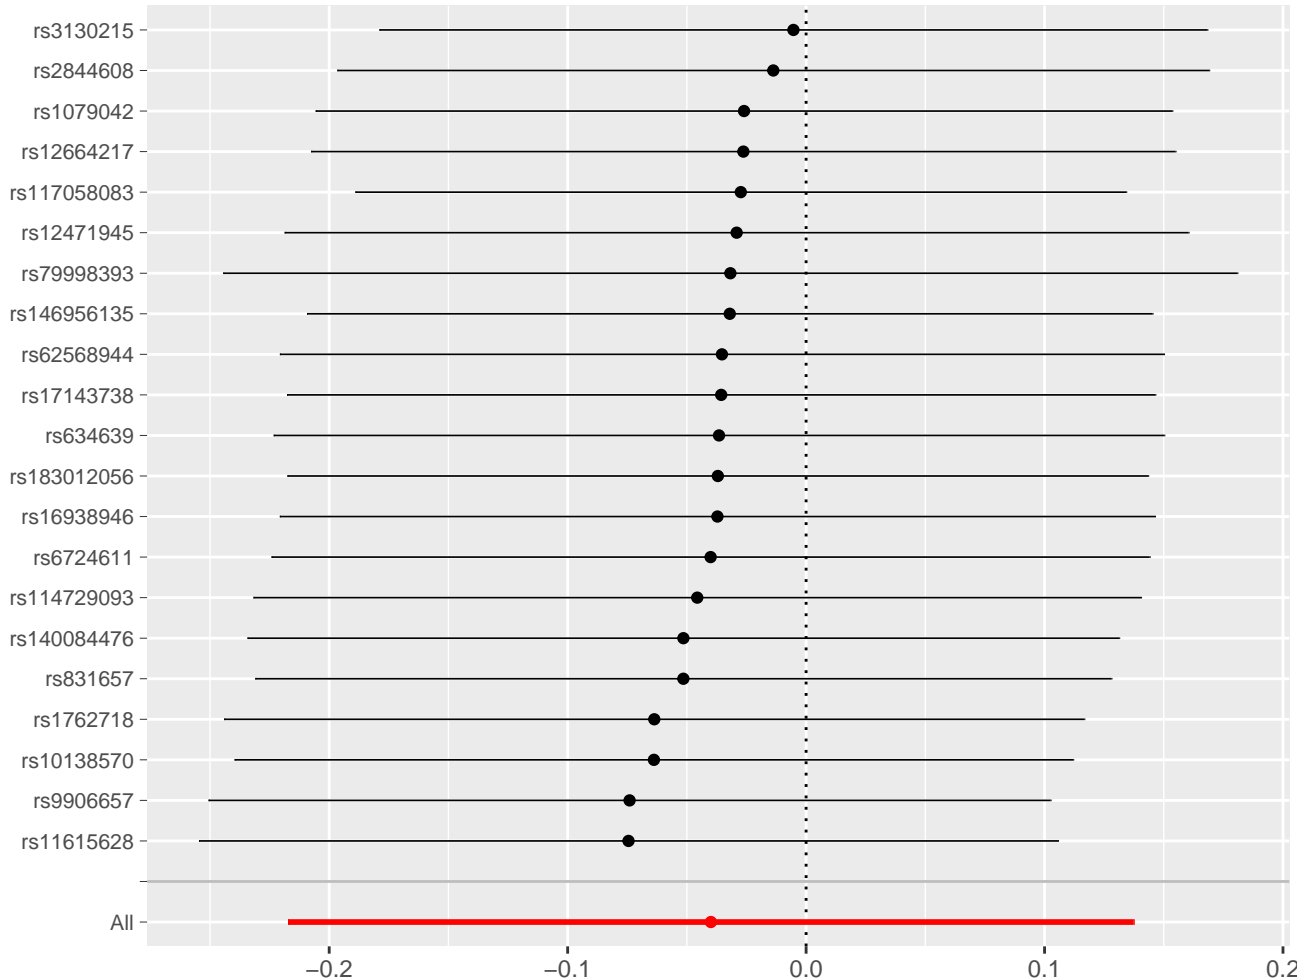

MR leave-one-out sensitivity analysis for 'CD4 on CD28+ CD4+' on 'Juvenile arthritis'

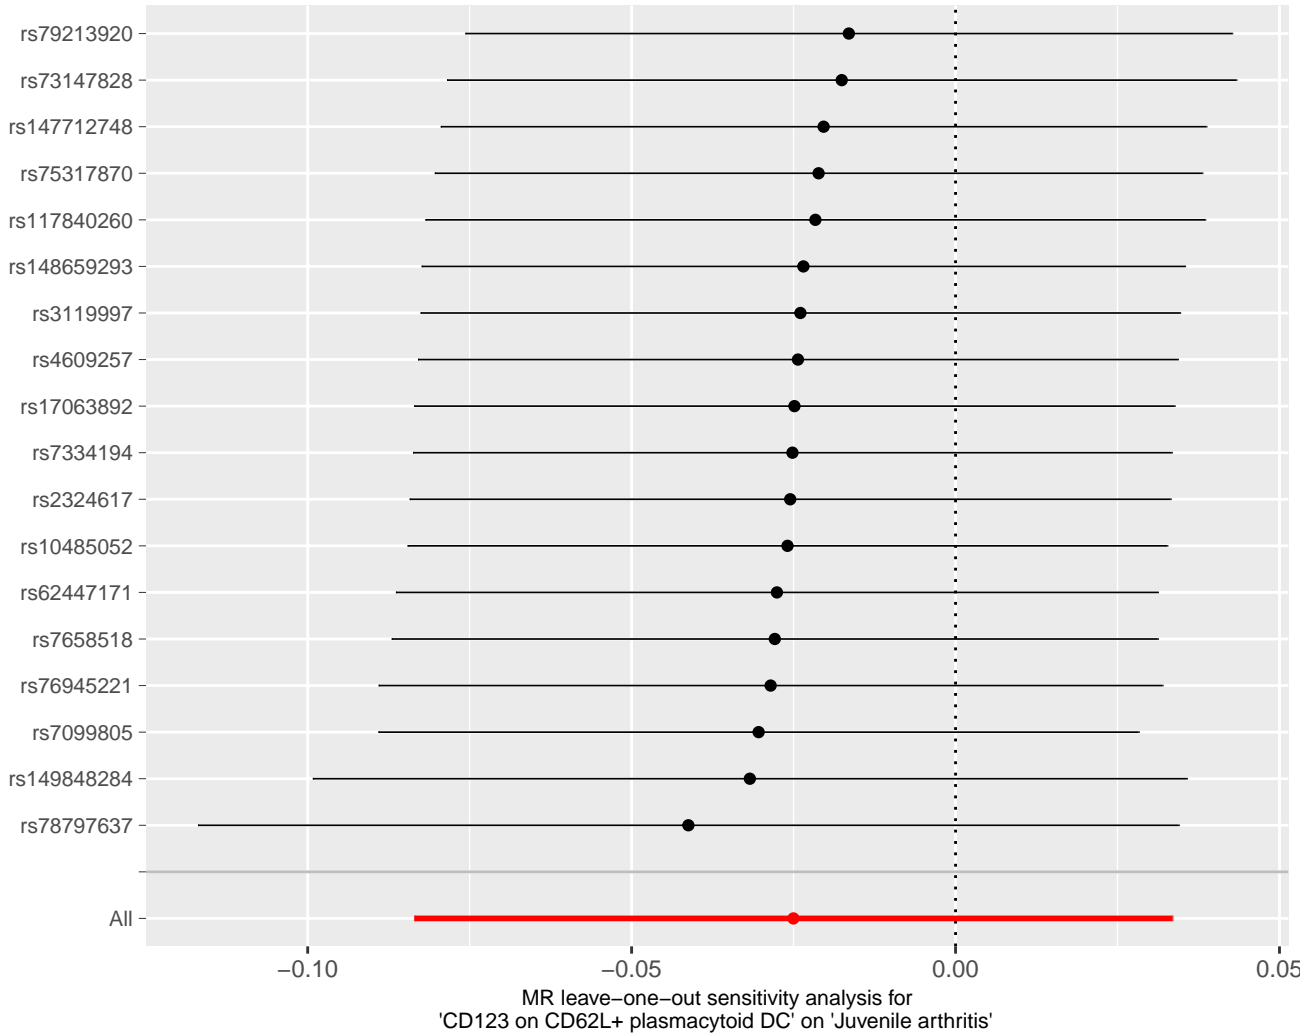

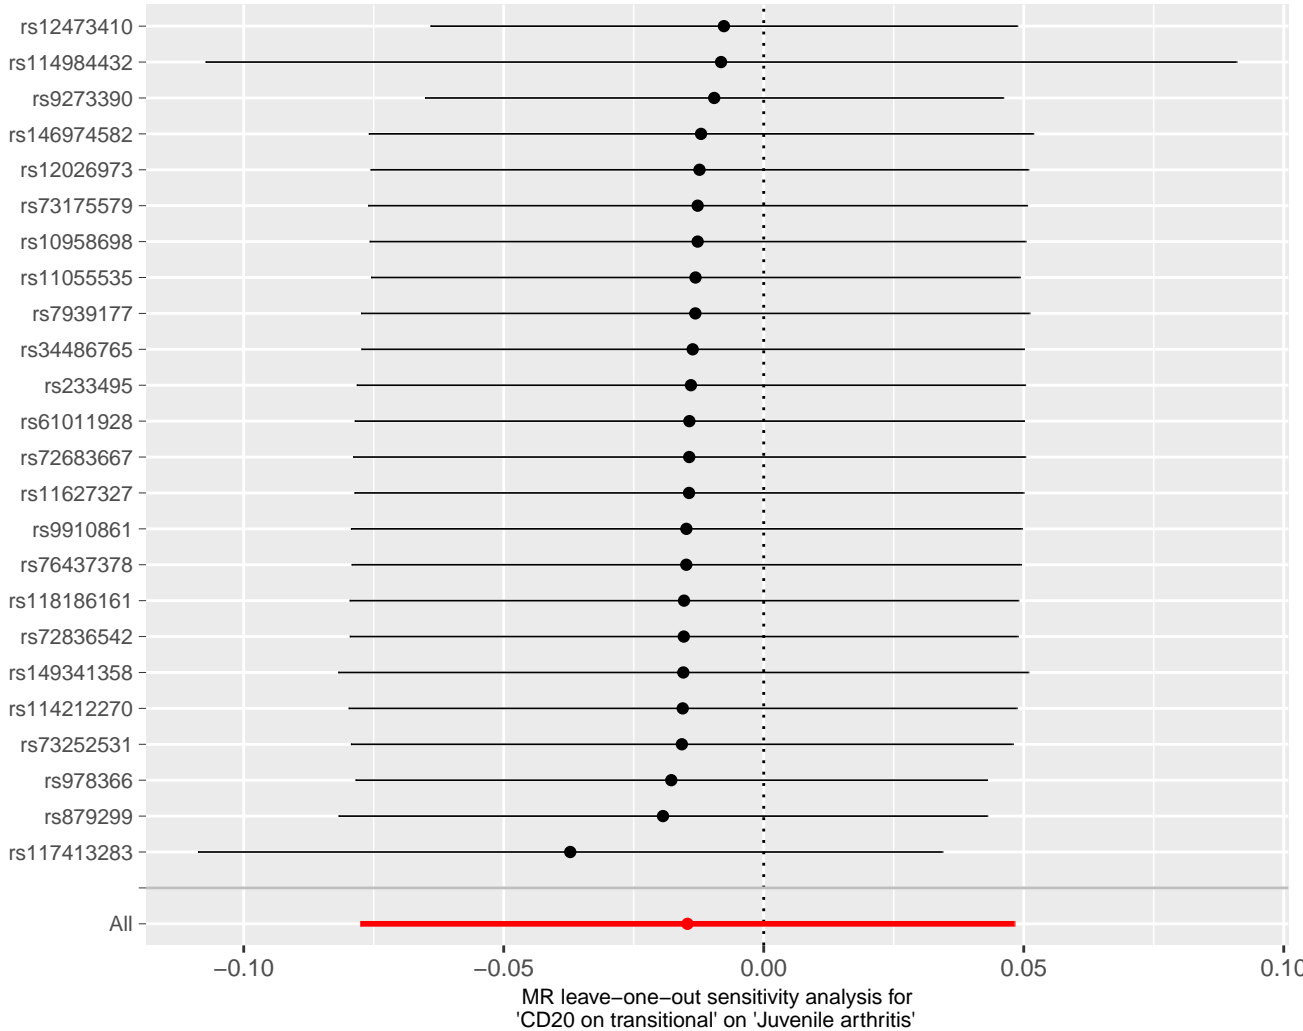

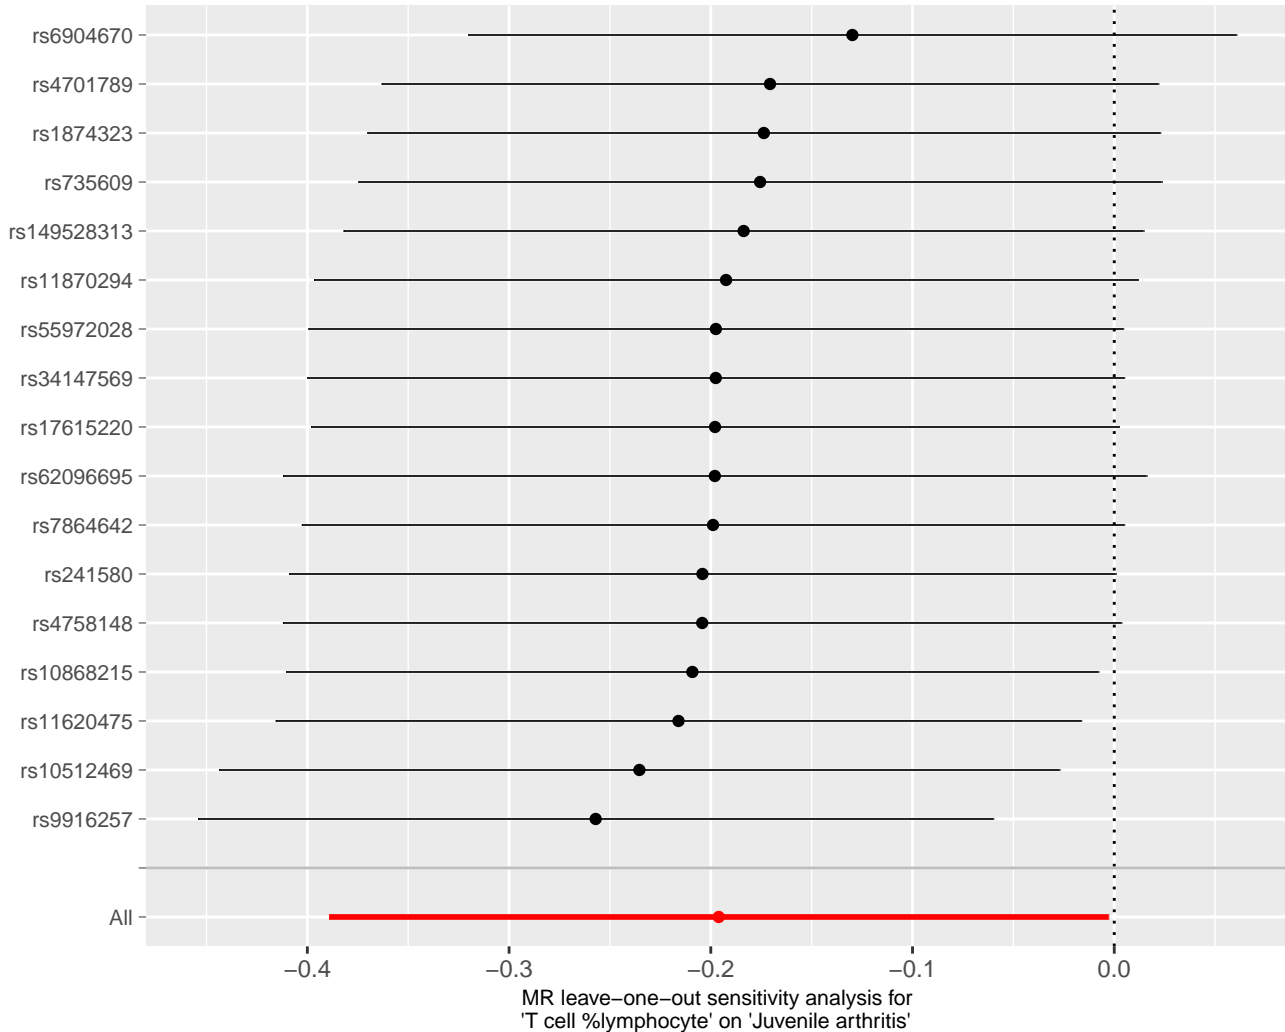

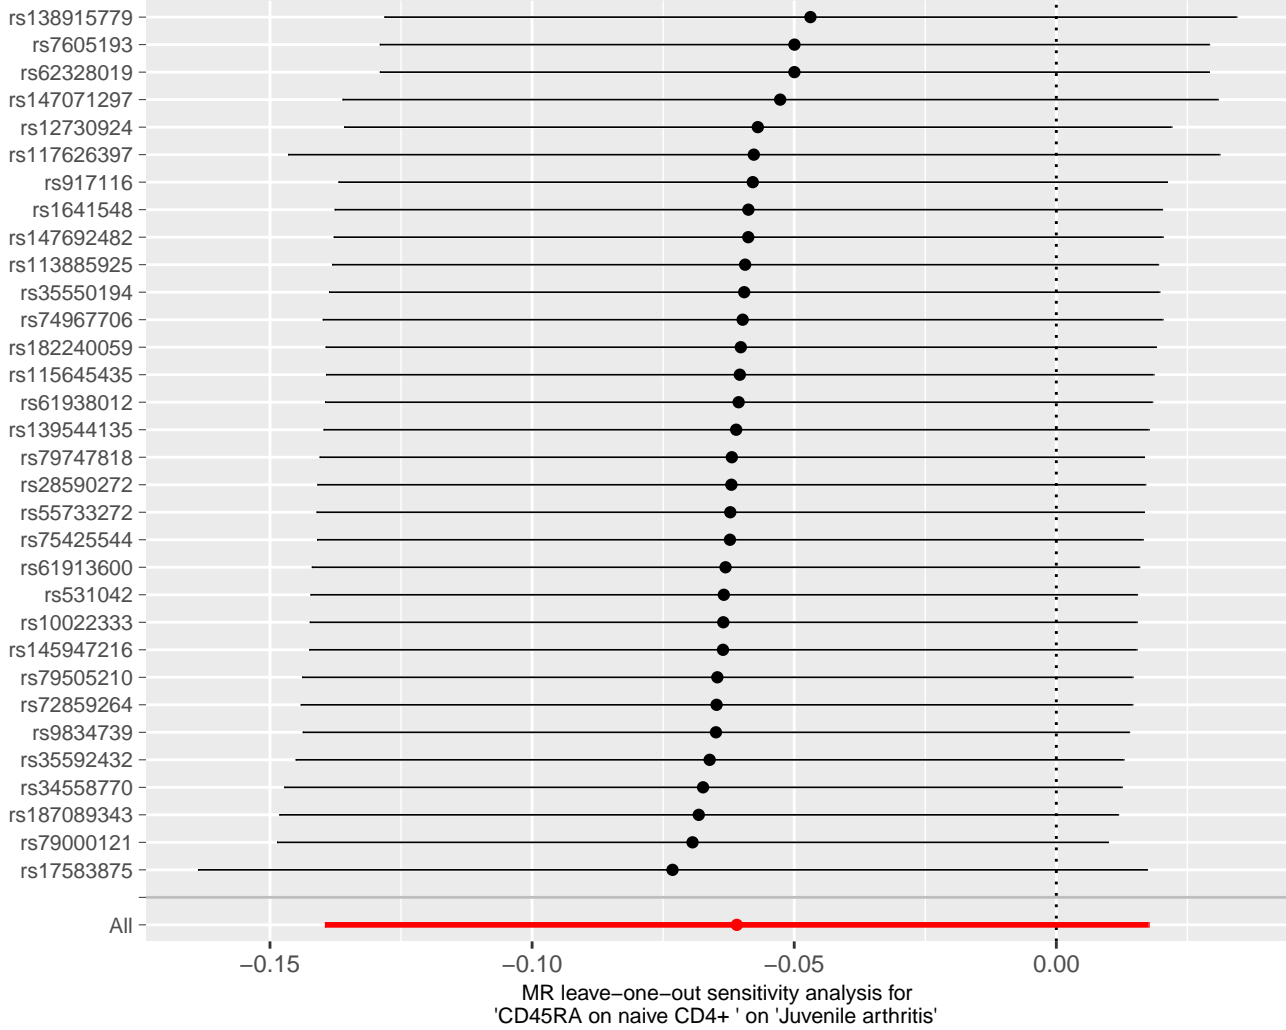



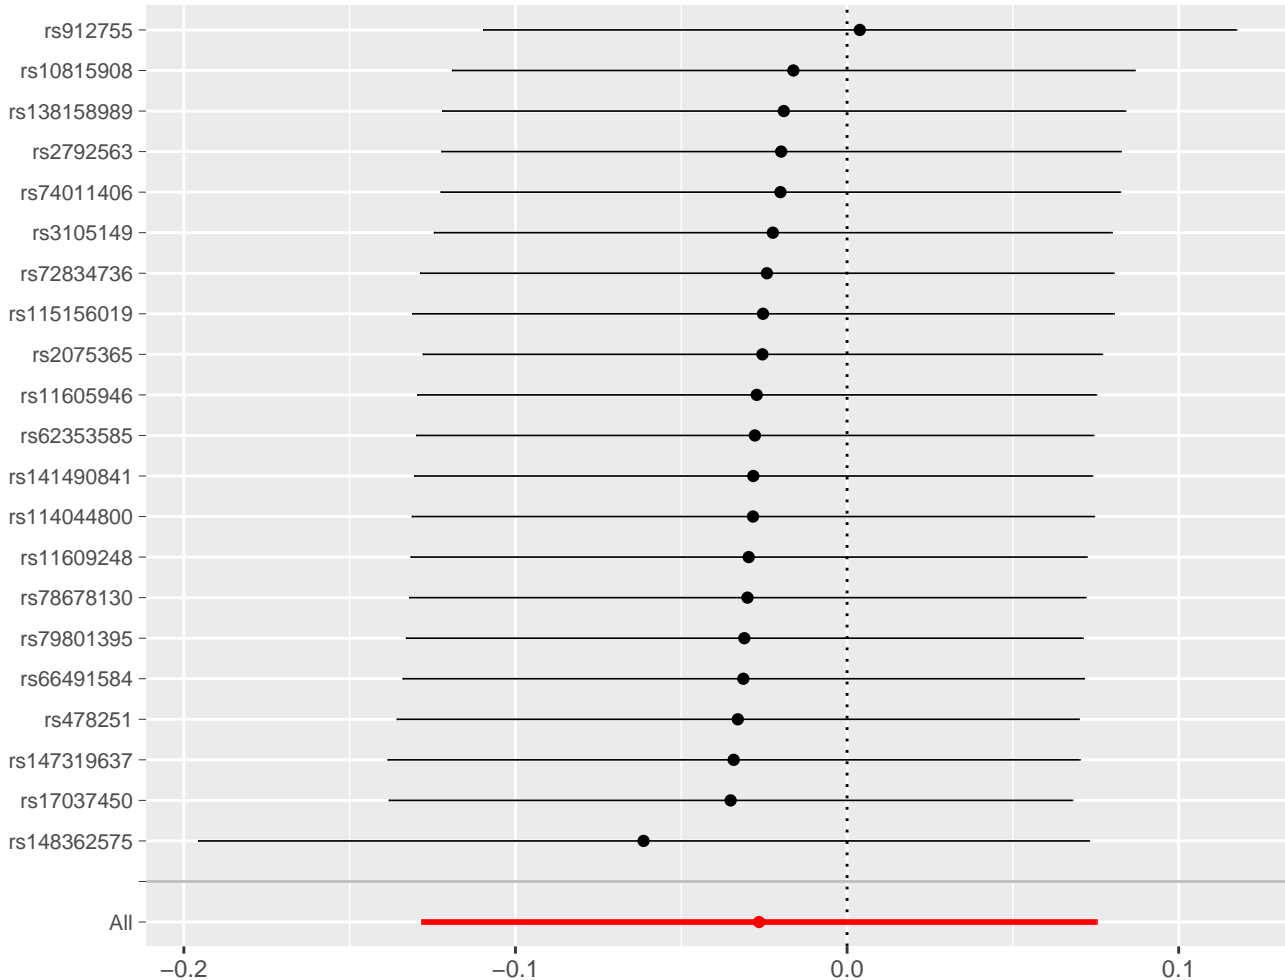

MR leave-one-out sensitivity analysis for 'IgD- CD38br AC' on 'Juvenile arthritis'

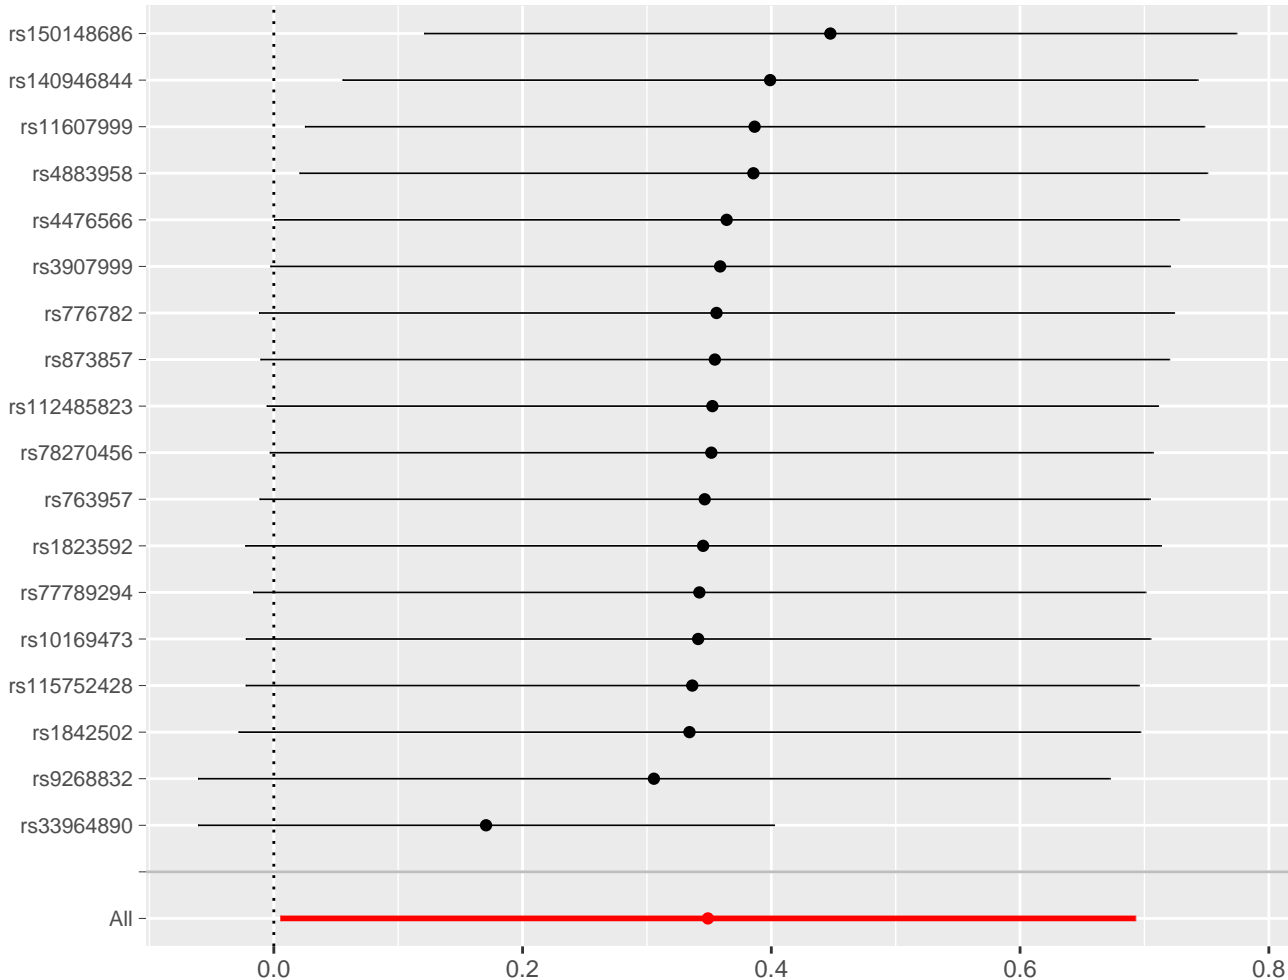

MR leave-one-out sensitivity analysis for 'SSC-A on lymphocyte' on 'Juvenile arthritis'

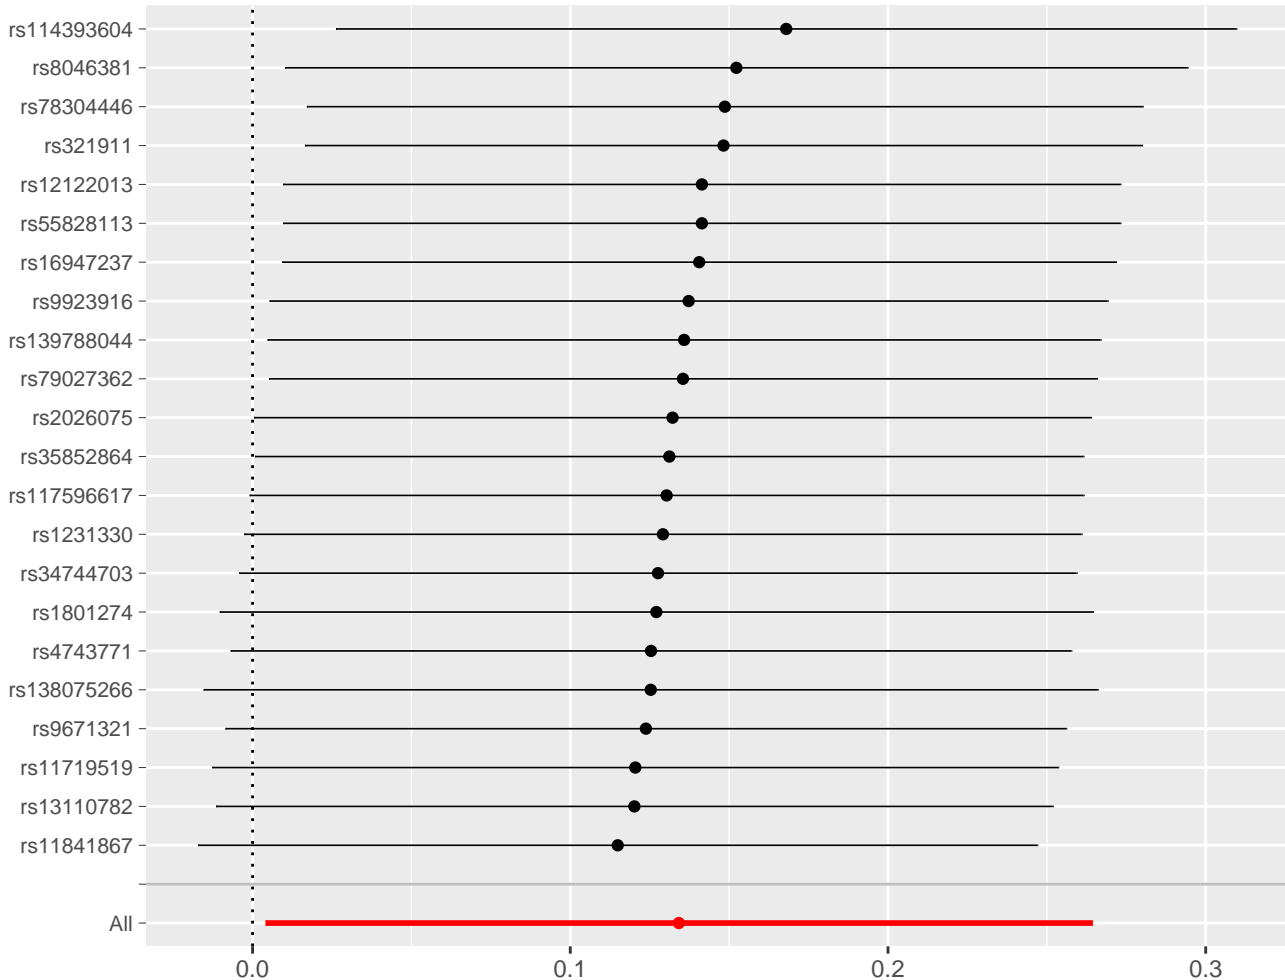

MR leave-one-out sensitivity analysis for 'CD11c on granulocyte' on 'Juvenile arthritis'

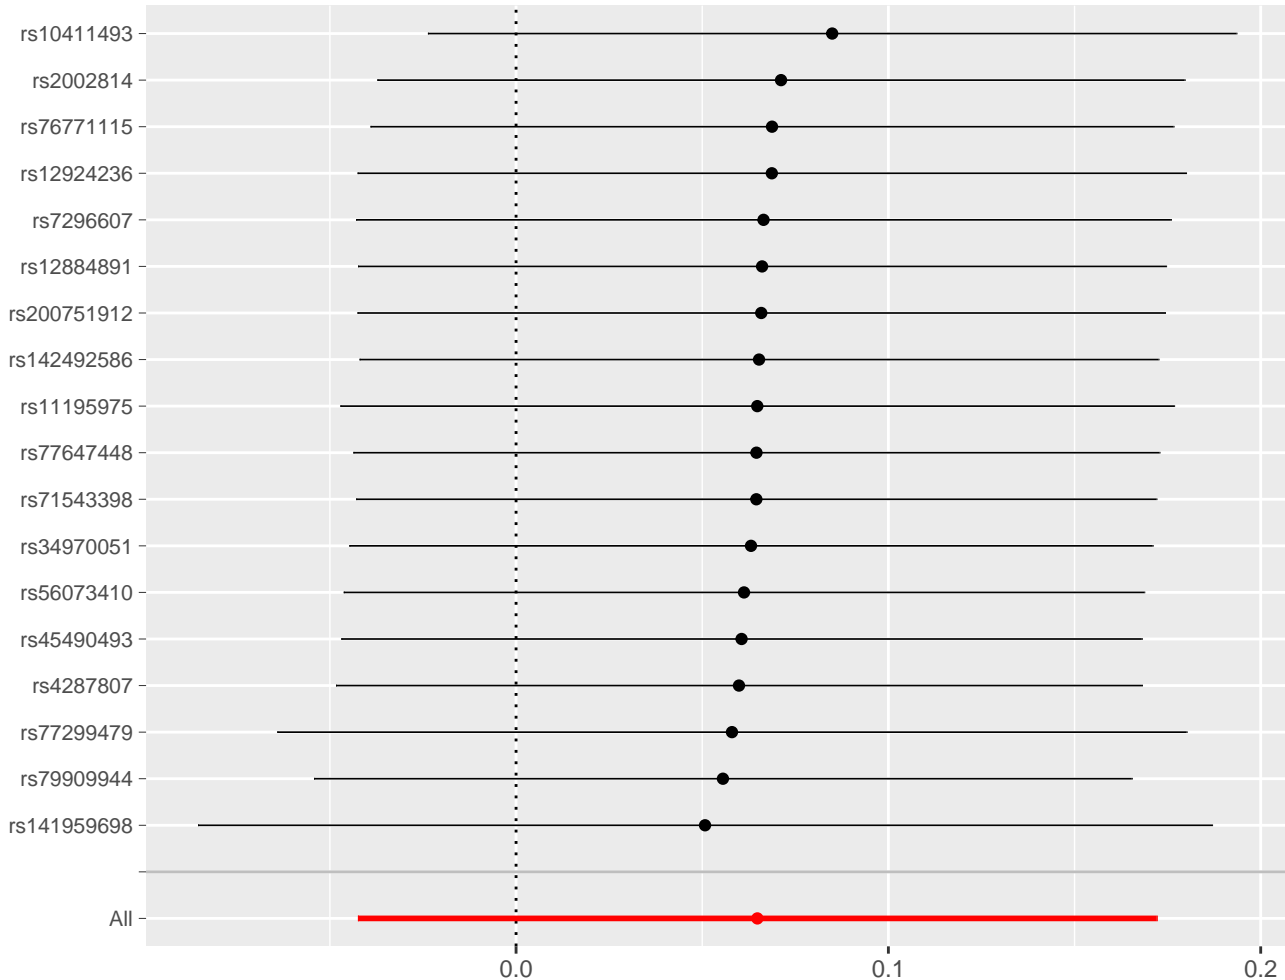

MR leave-one-out sensitivity analysis for 'CD45 on HLA DR+ T cell' on 'Juvenile arthritis'

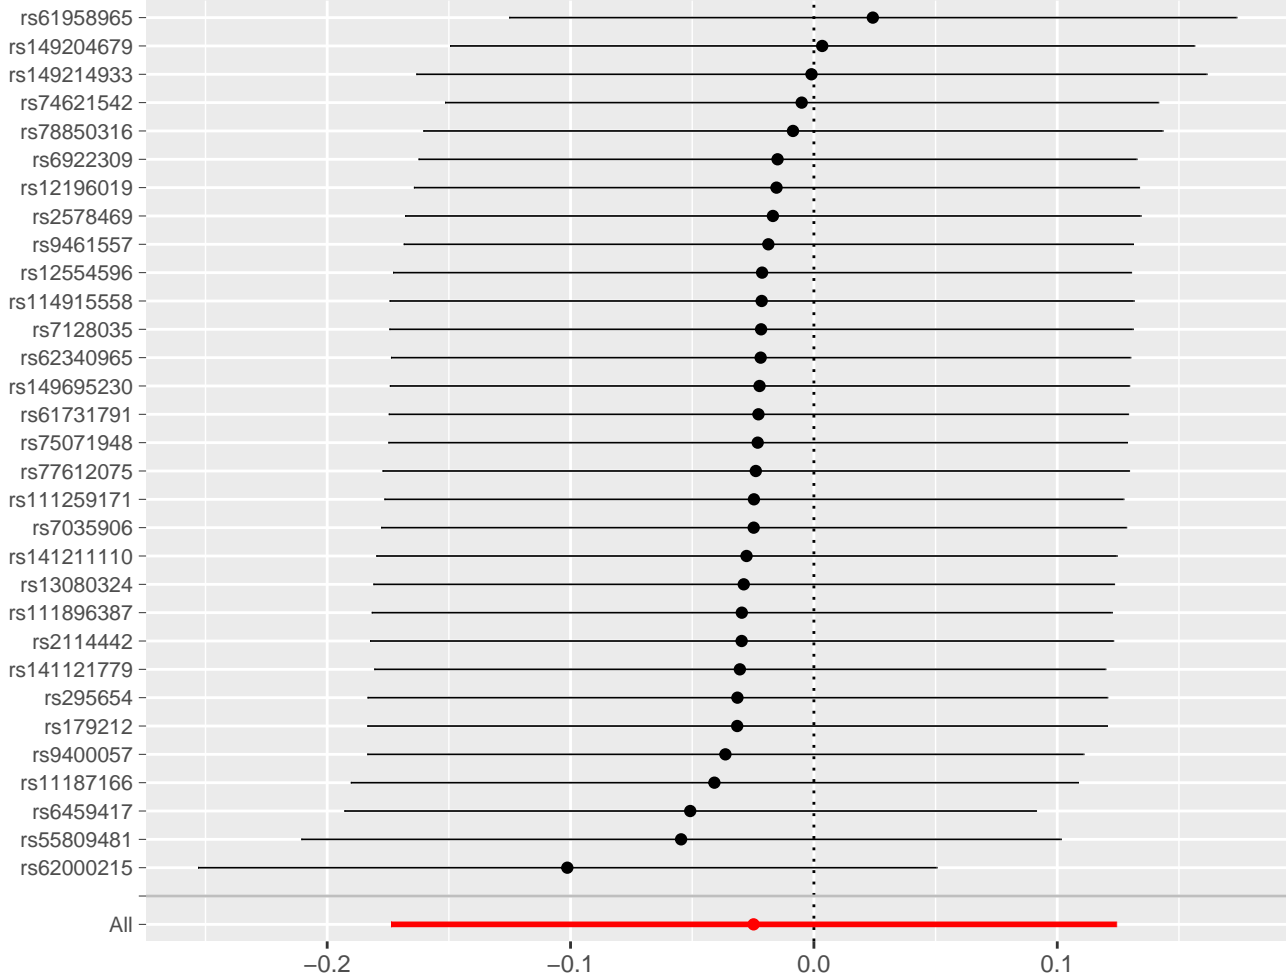

MR leave-one-out sensitivity analysis for 'CD20 on CD24+ CD27+' on 'Juvenile arthritis'

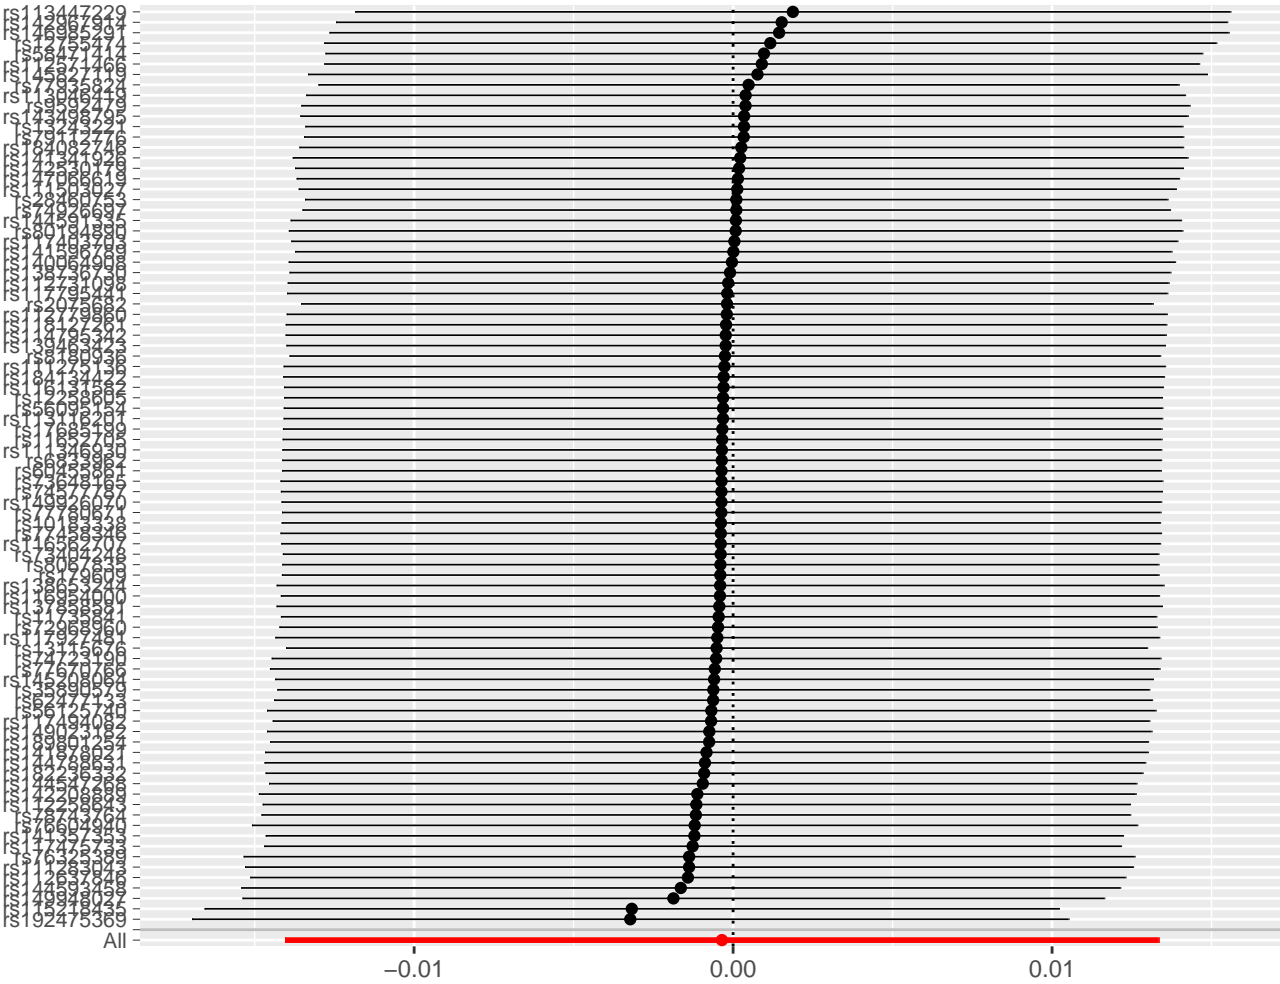

MR leave-one-out sensitivity analysis for  
'CD28+ CD45RA+ CD8br %T cell' on 'Juvenile arthritis'

All

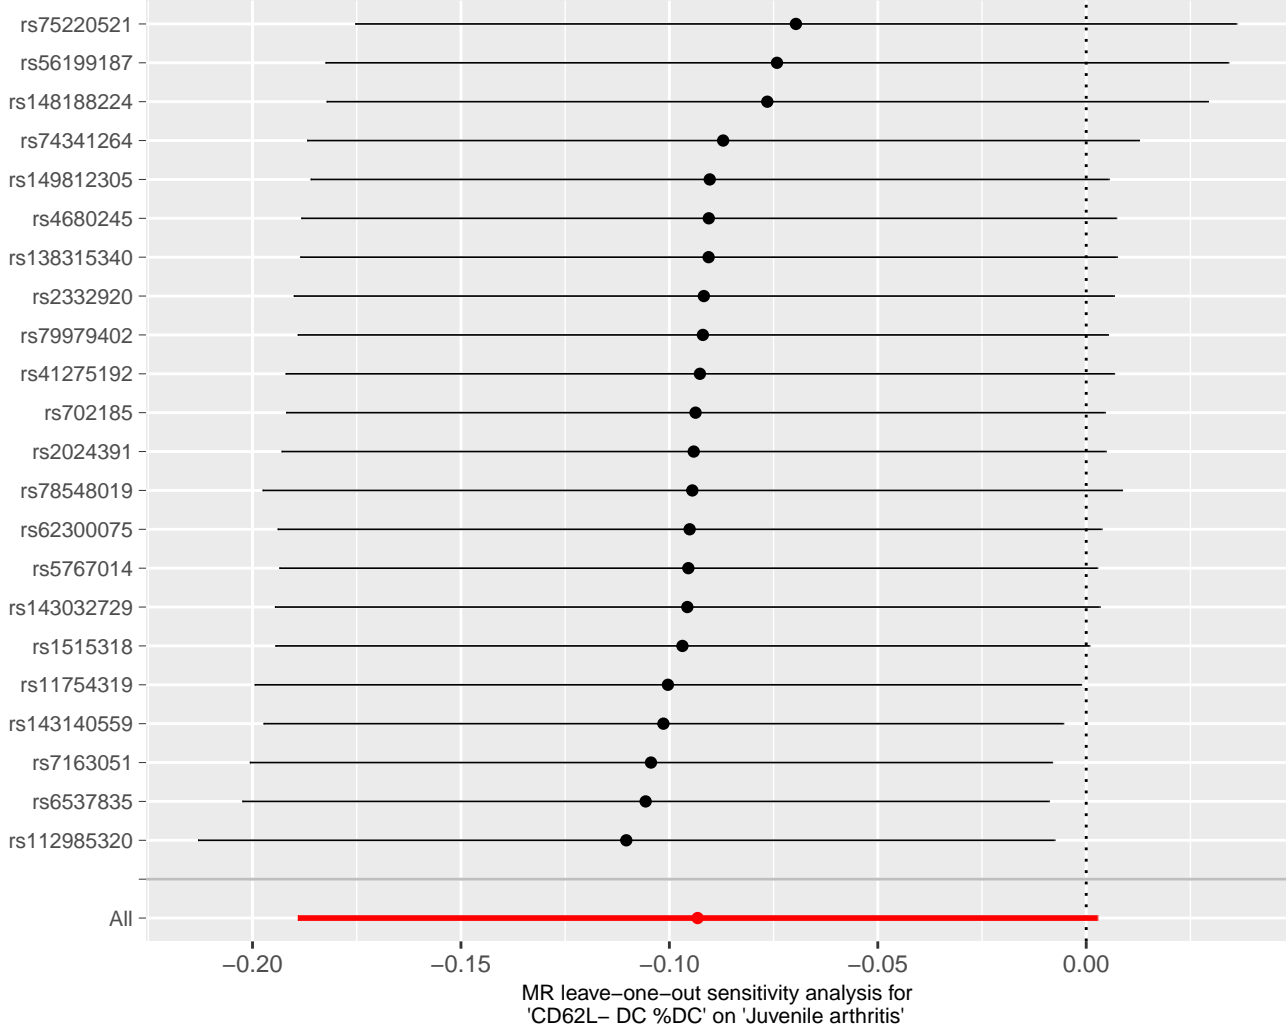

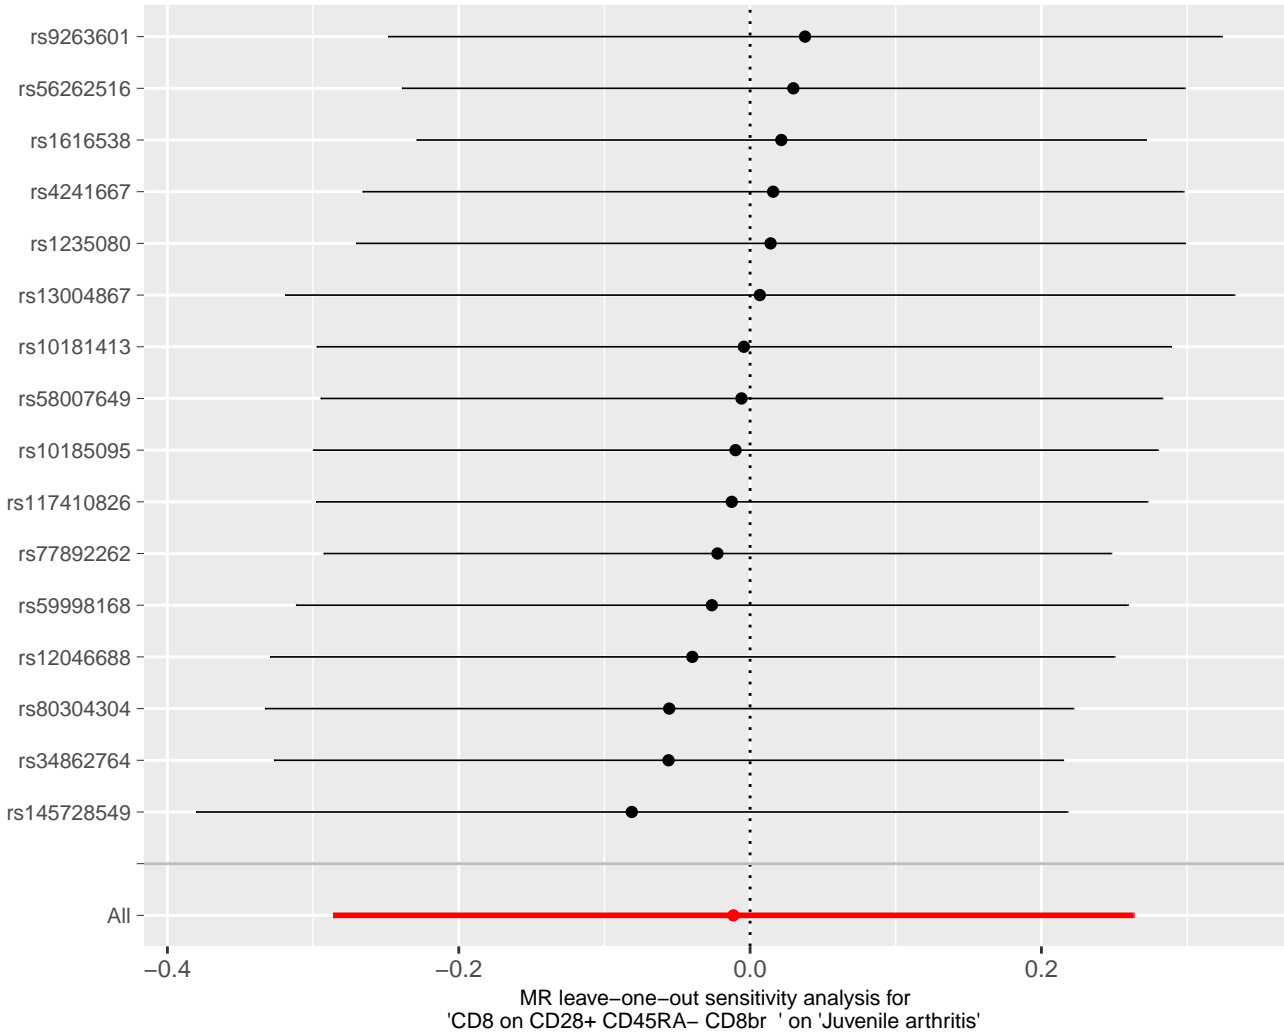



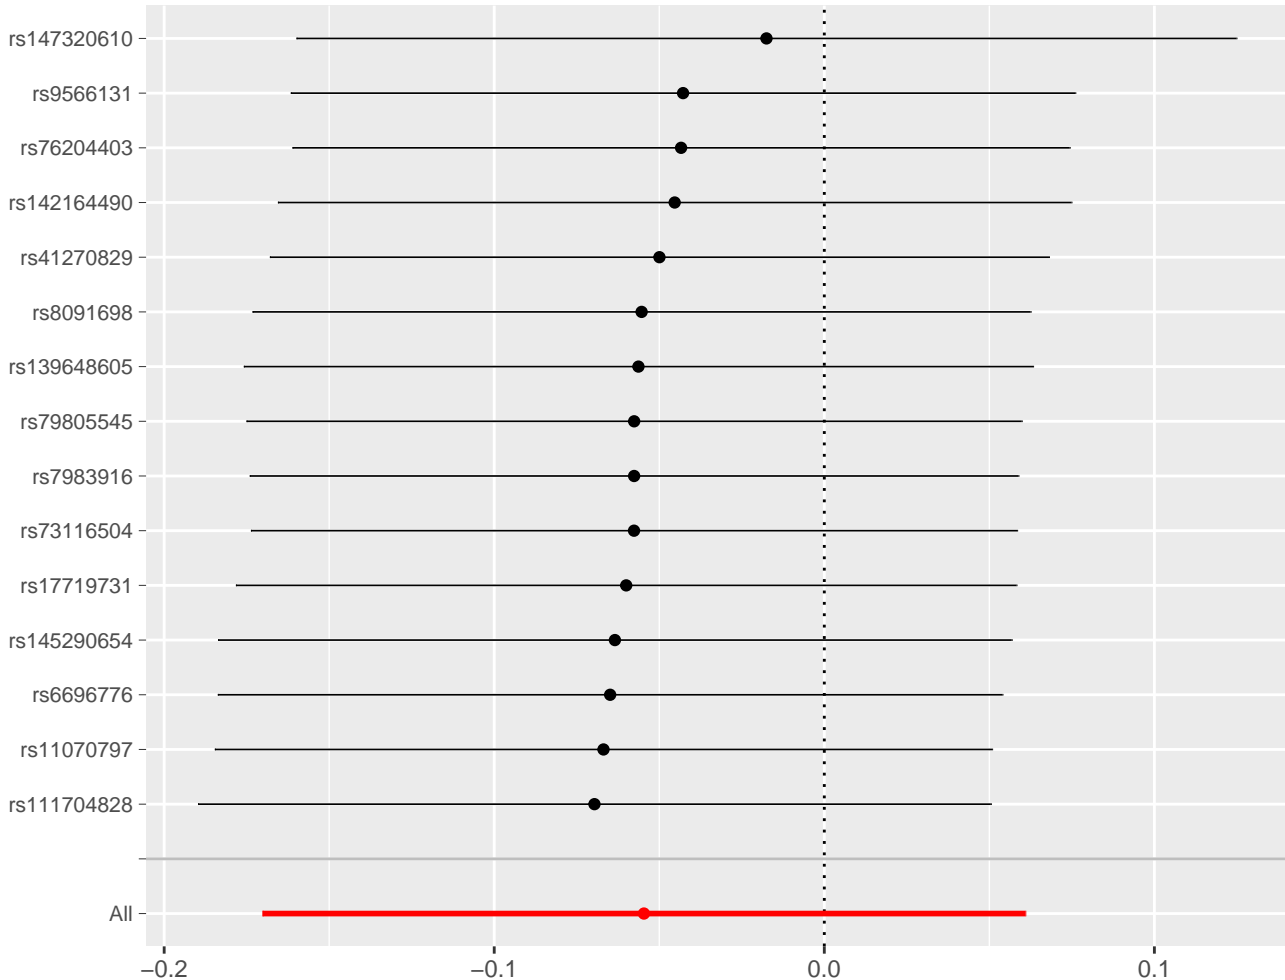

MR leave-one-out sensitivity analysis for 'CD45 on Mo MDSC ' on 'Juvenile arthritis'

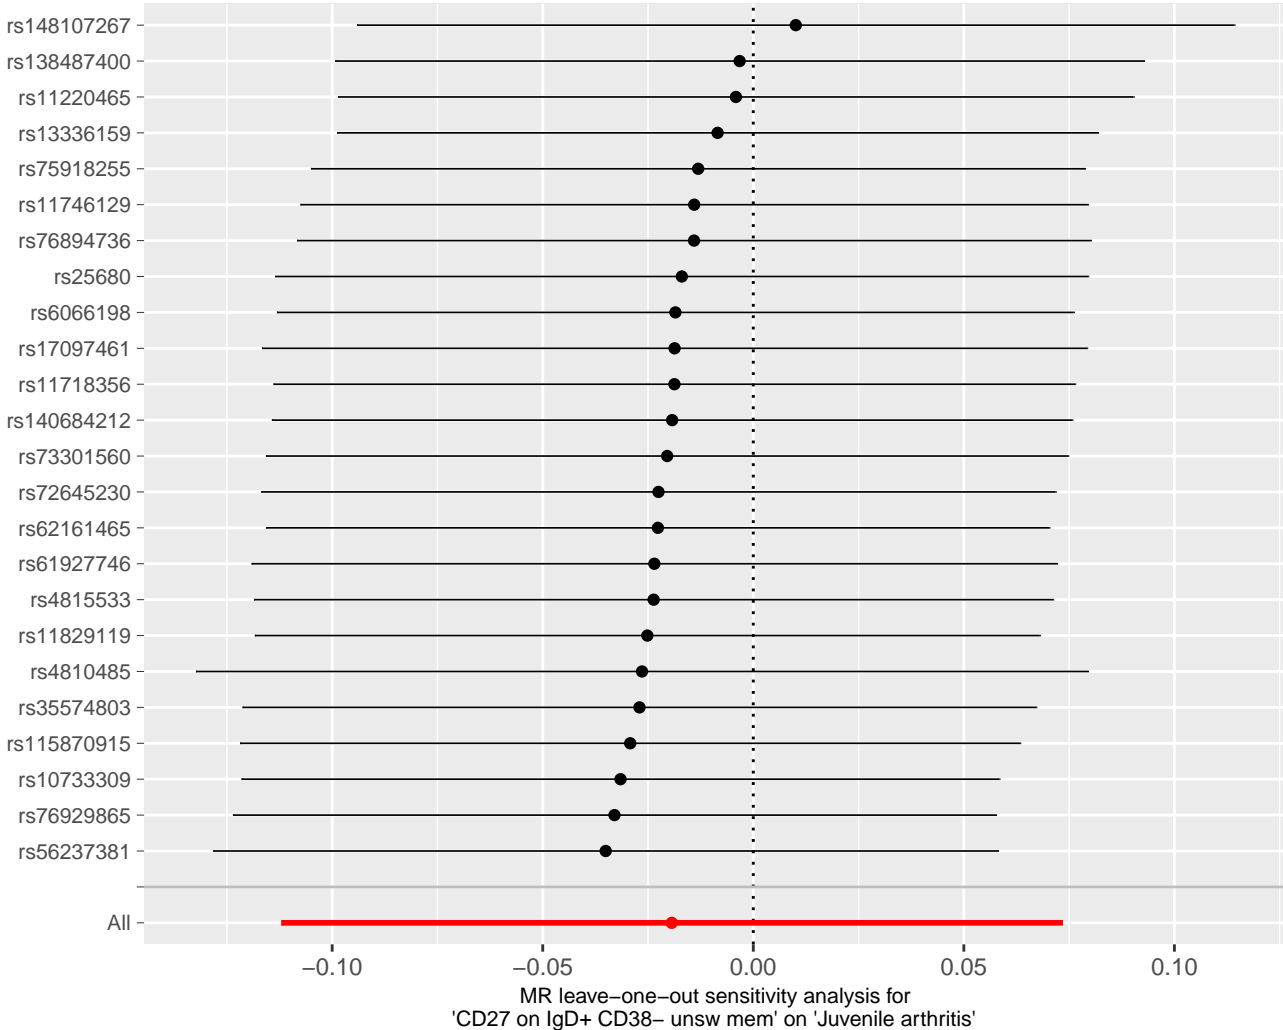

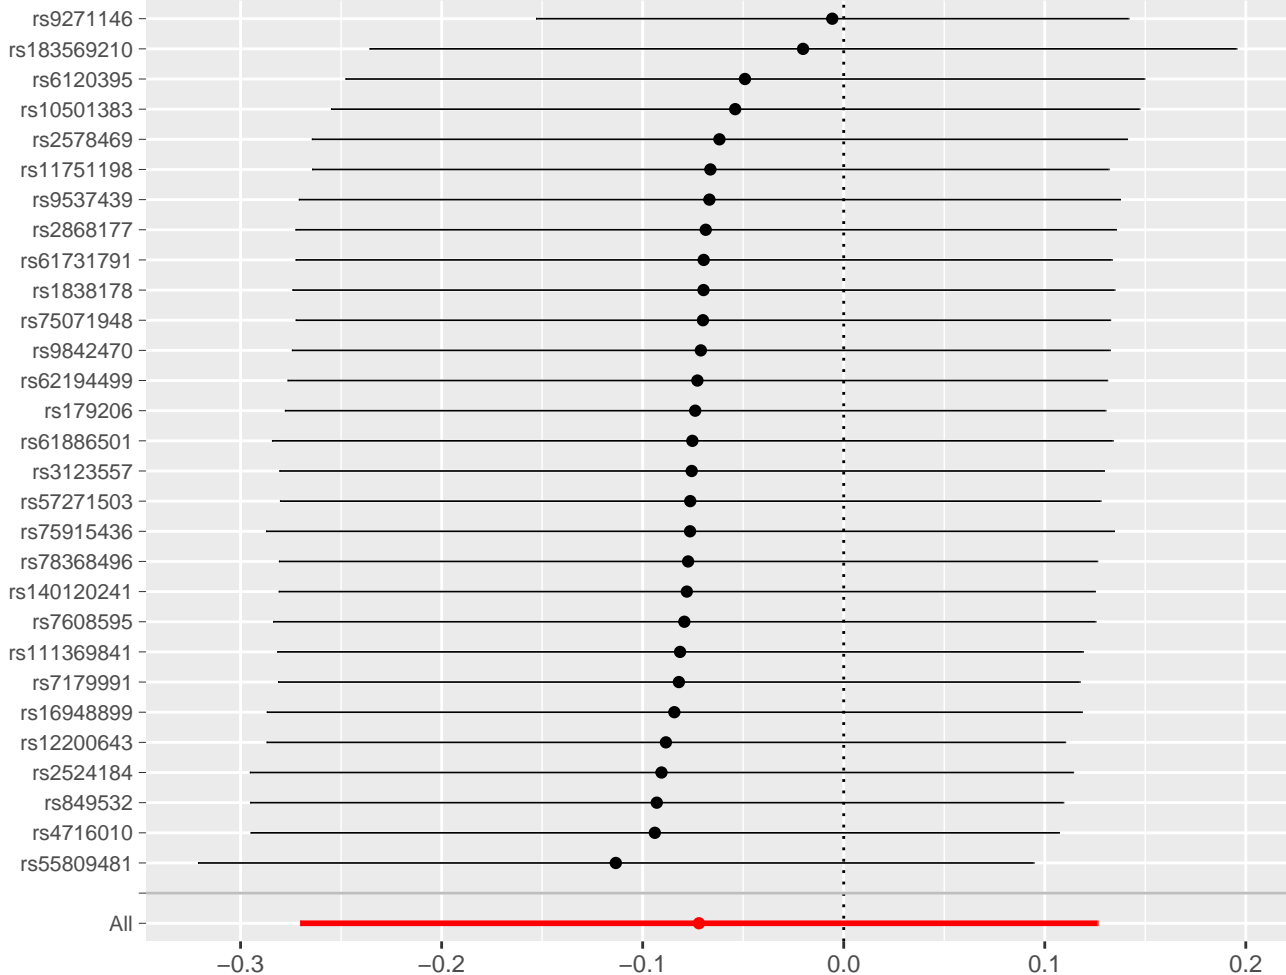

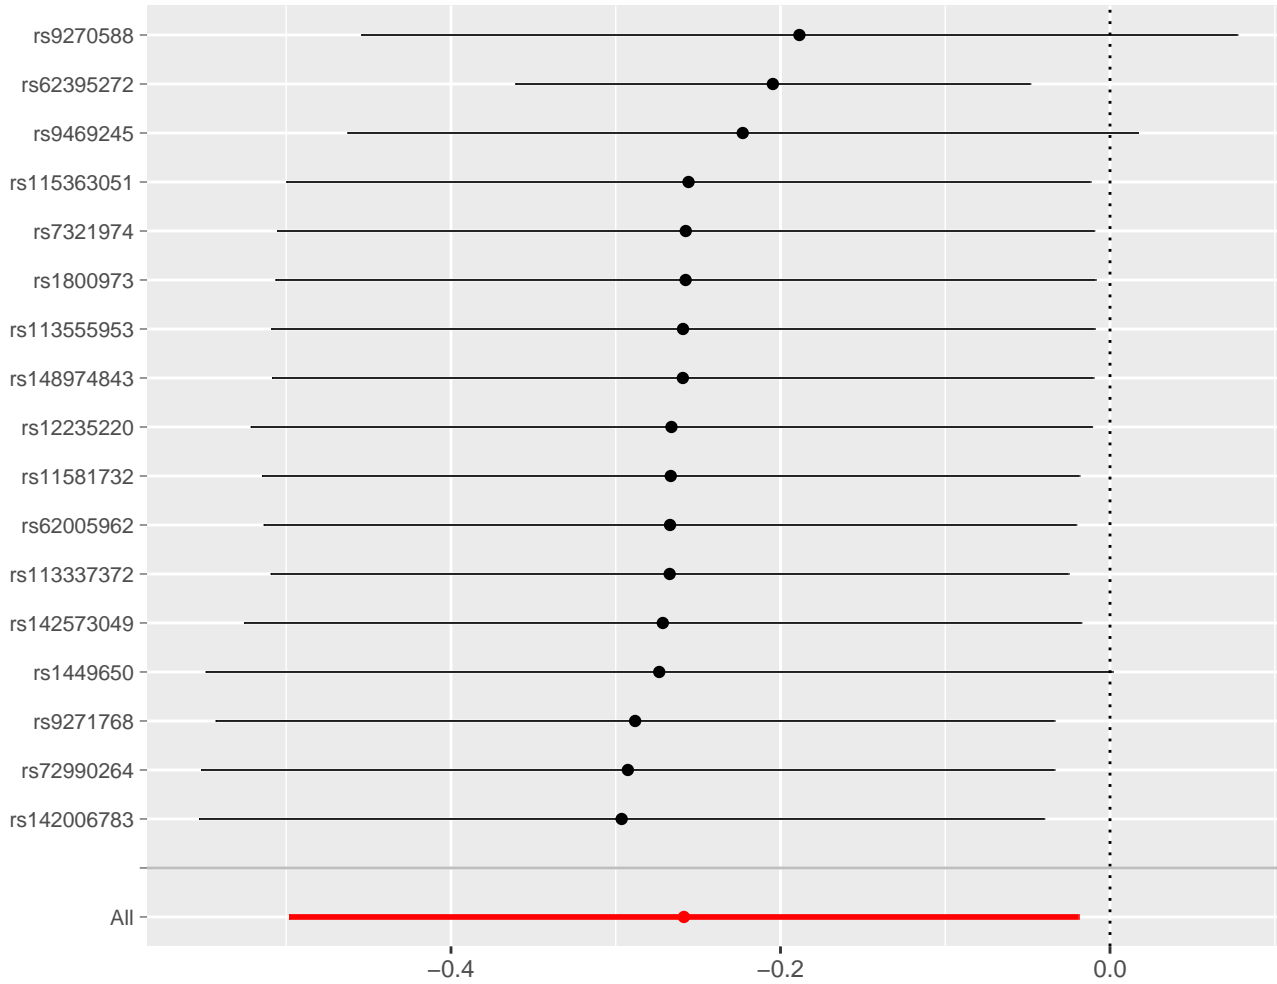

MR leave-one-out sensitivity analysis for 'HLA DR on monocyte' on 'Juvenile arthritis'

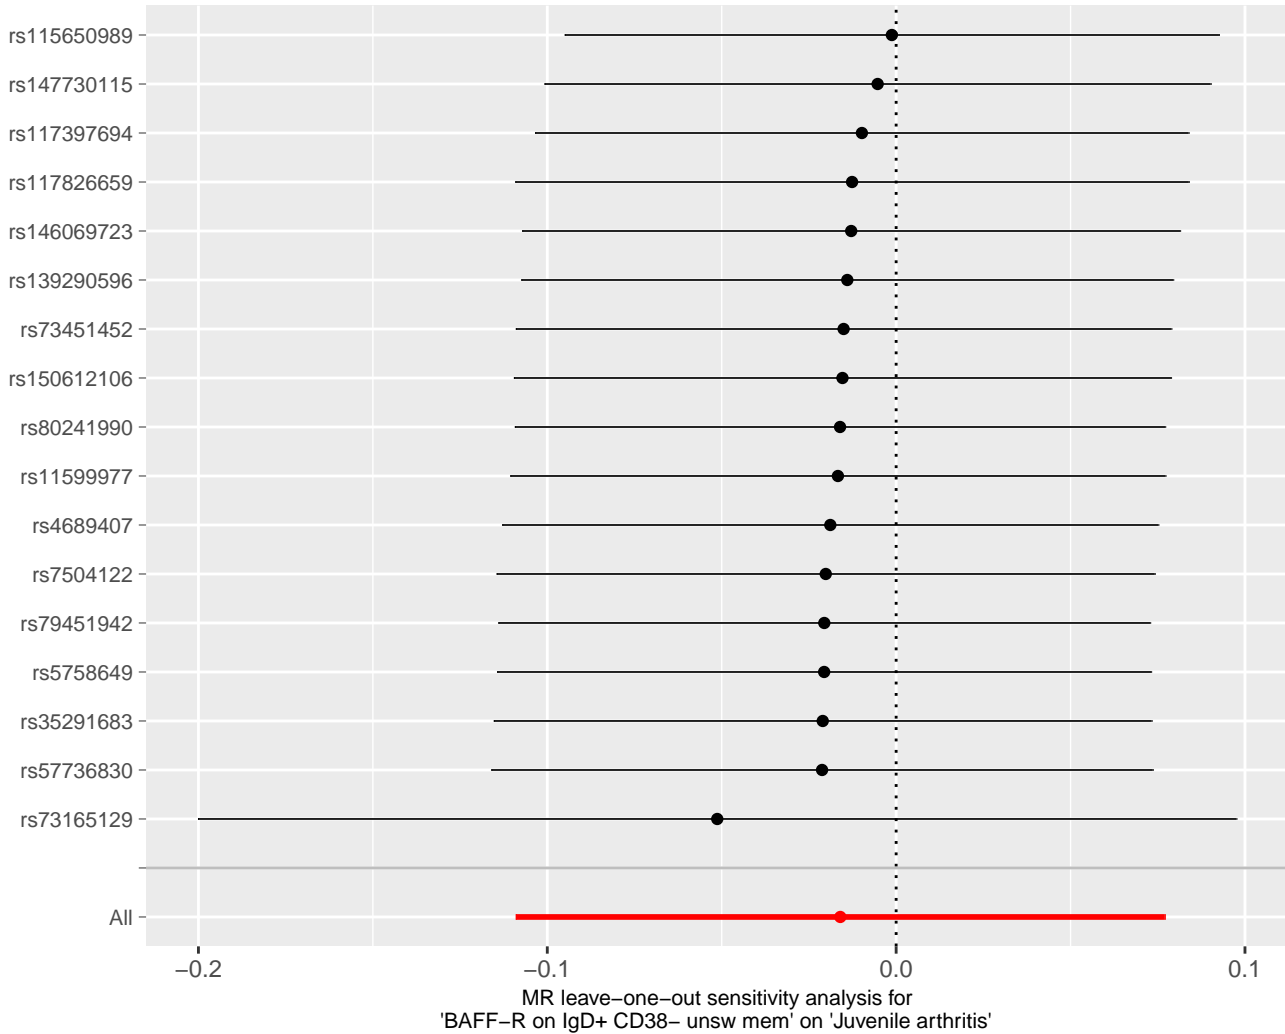

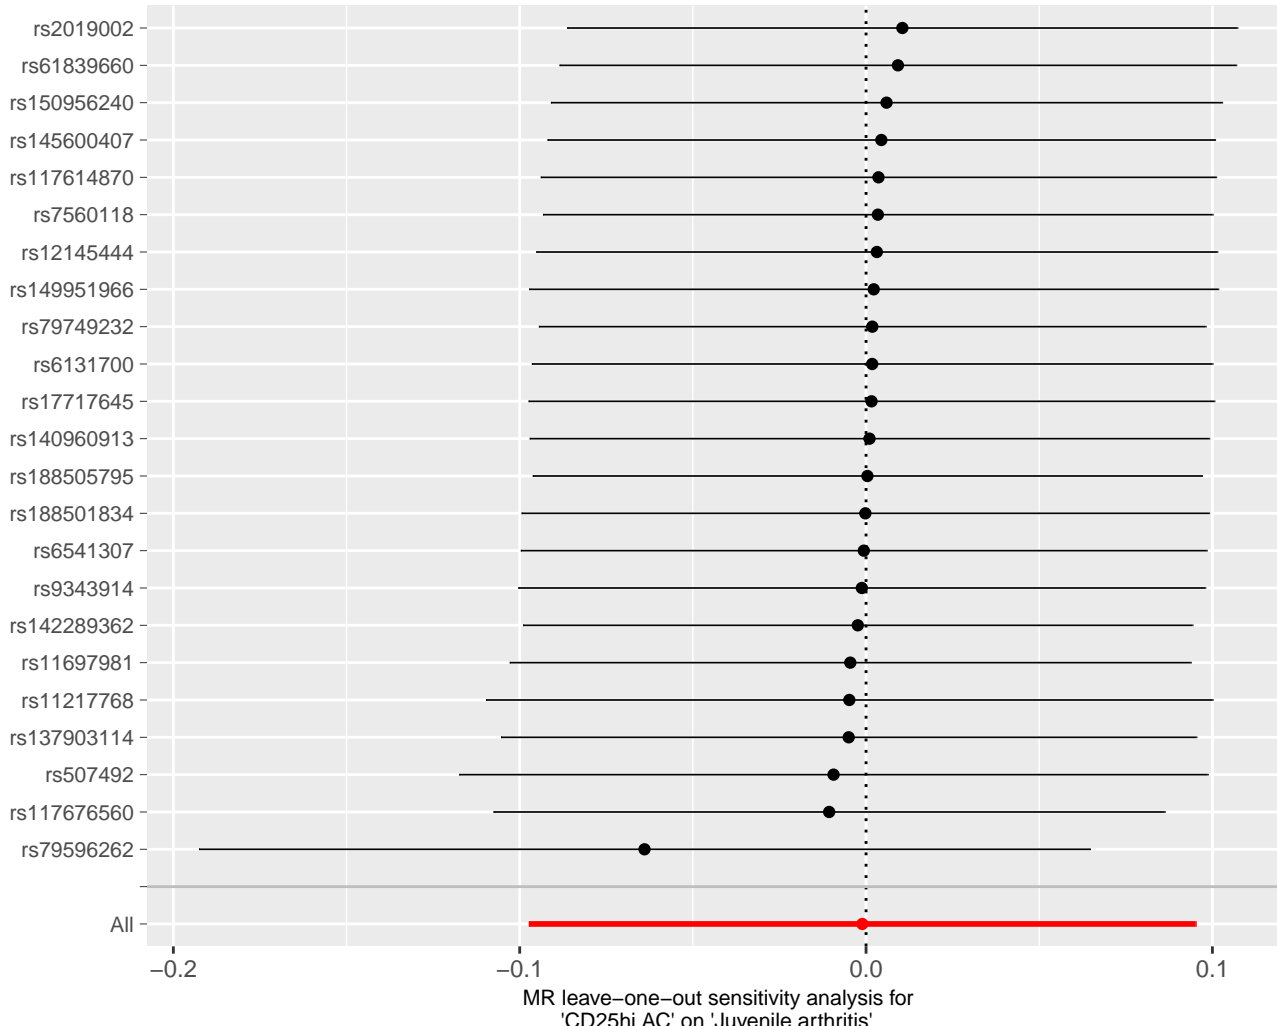

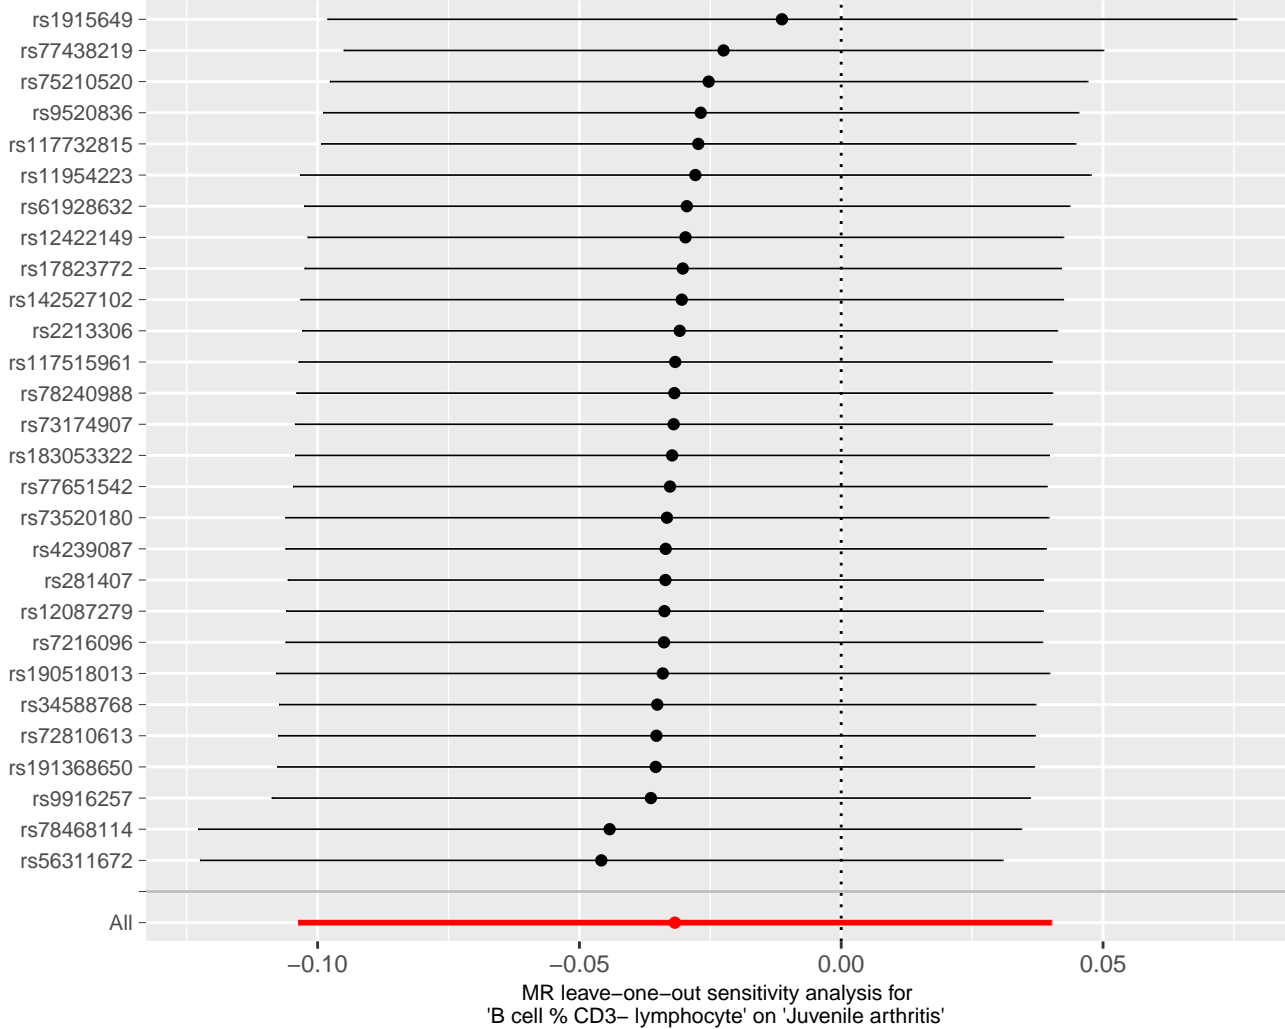

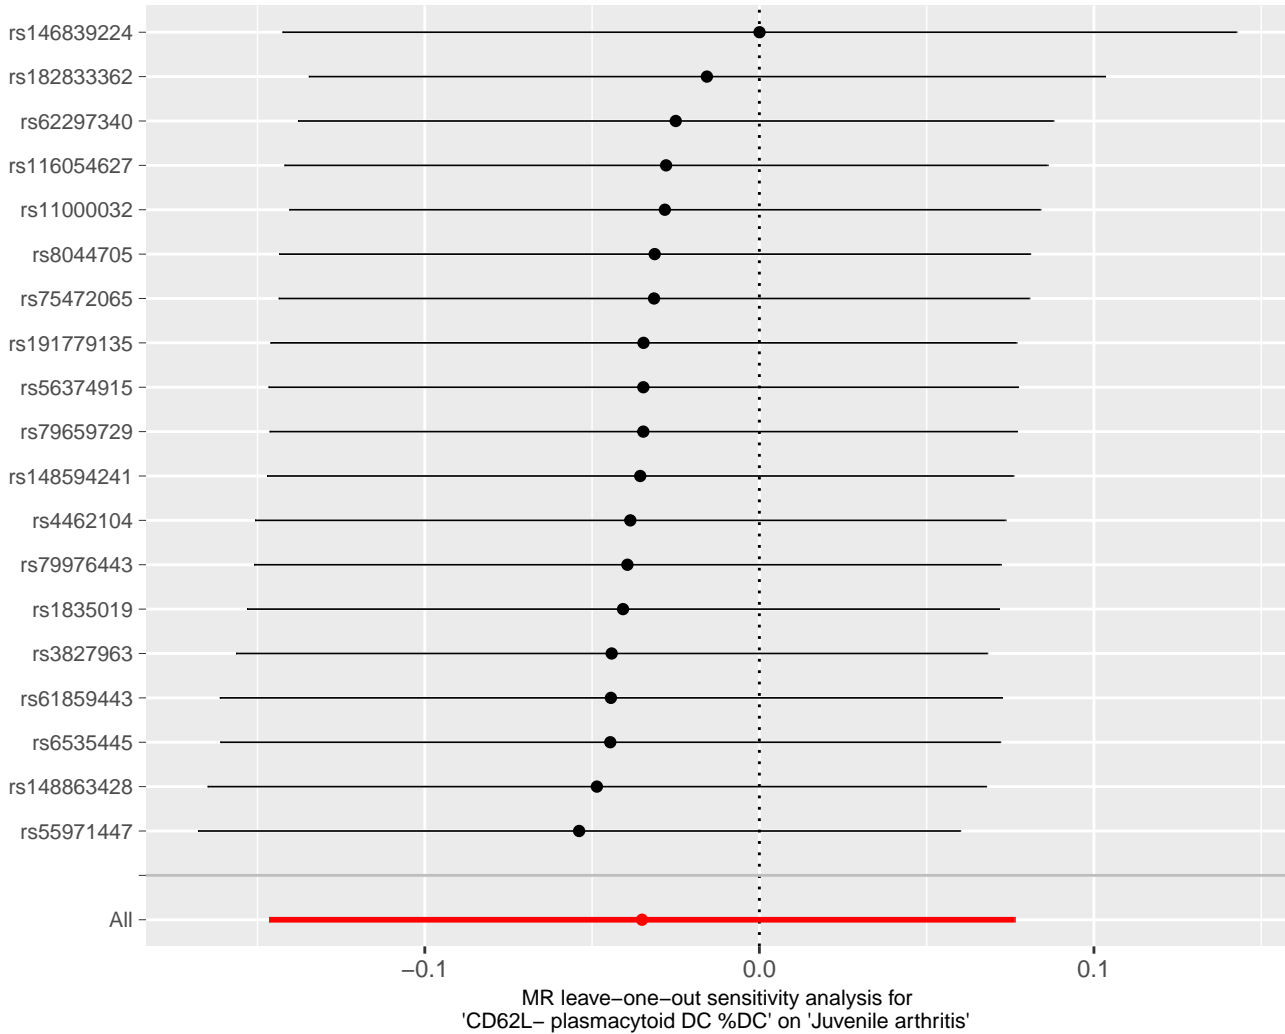



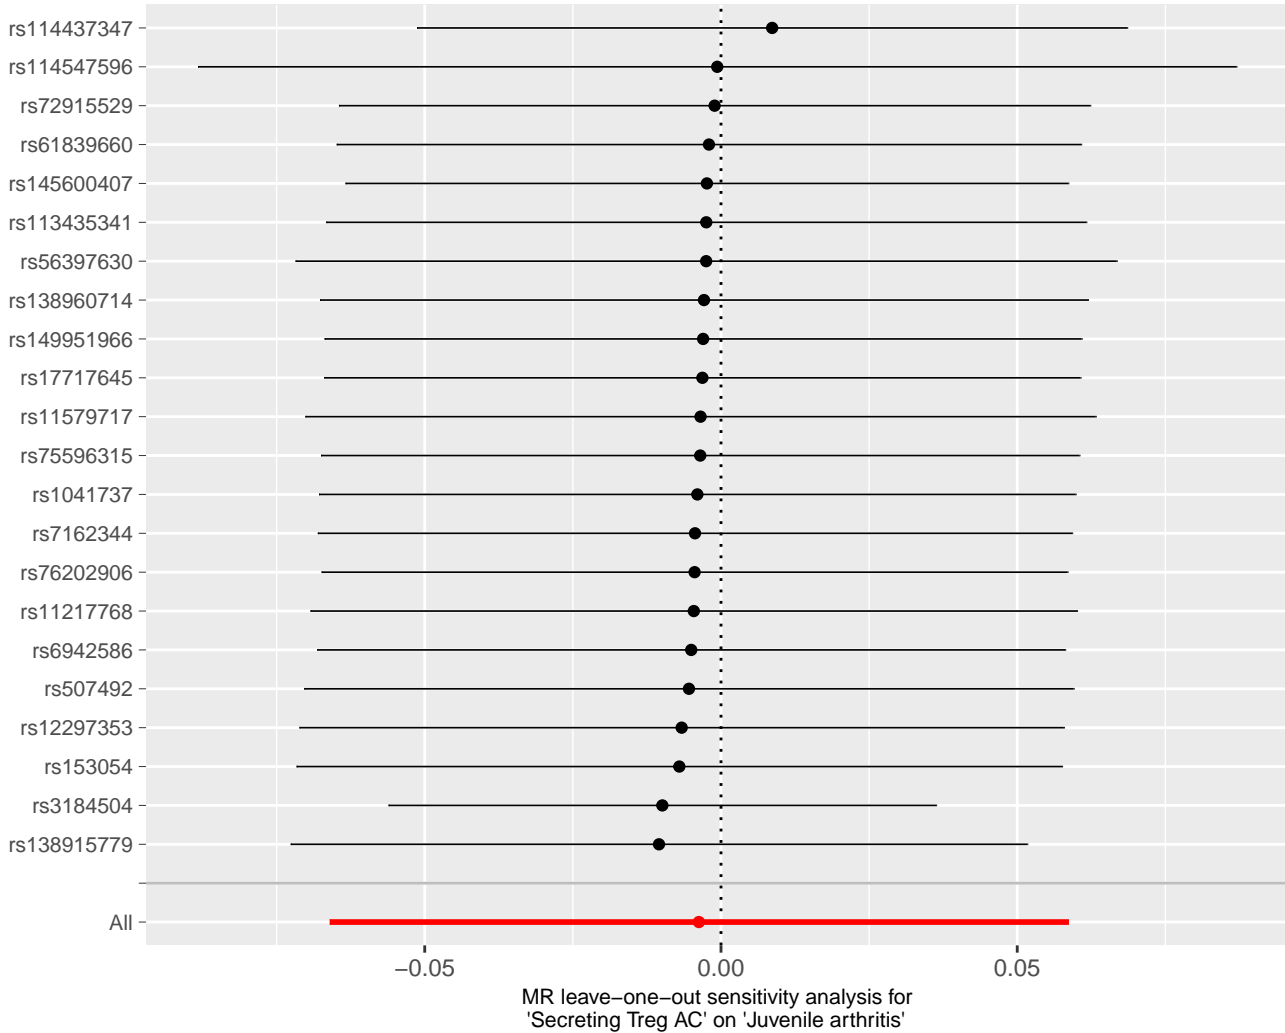

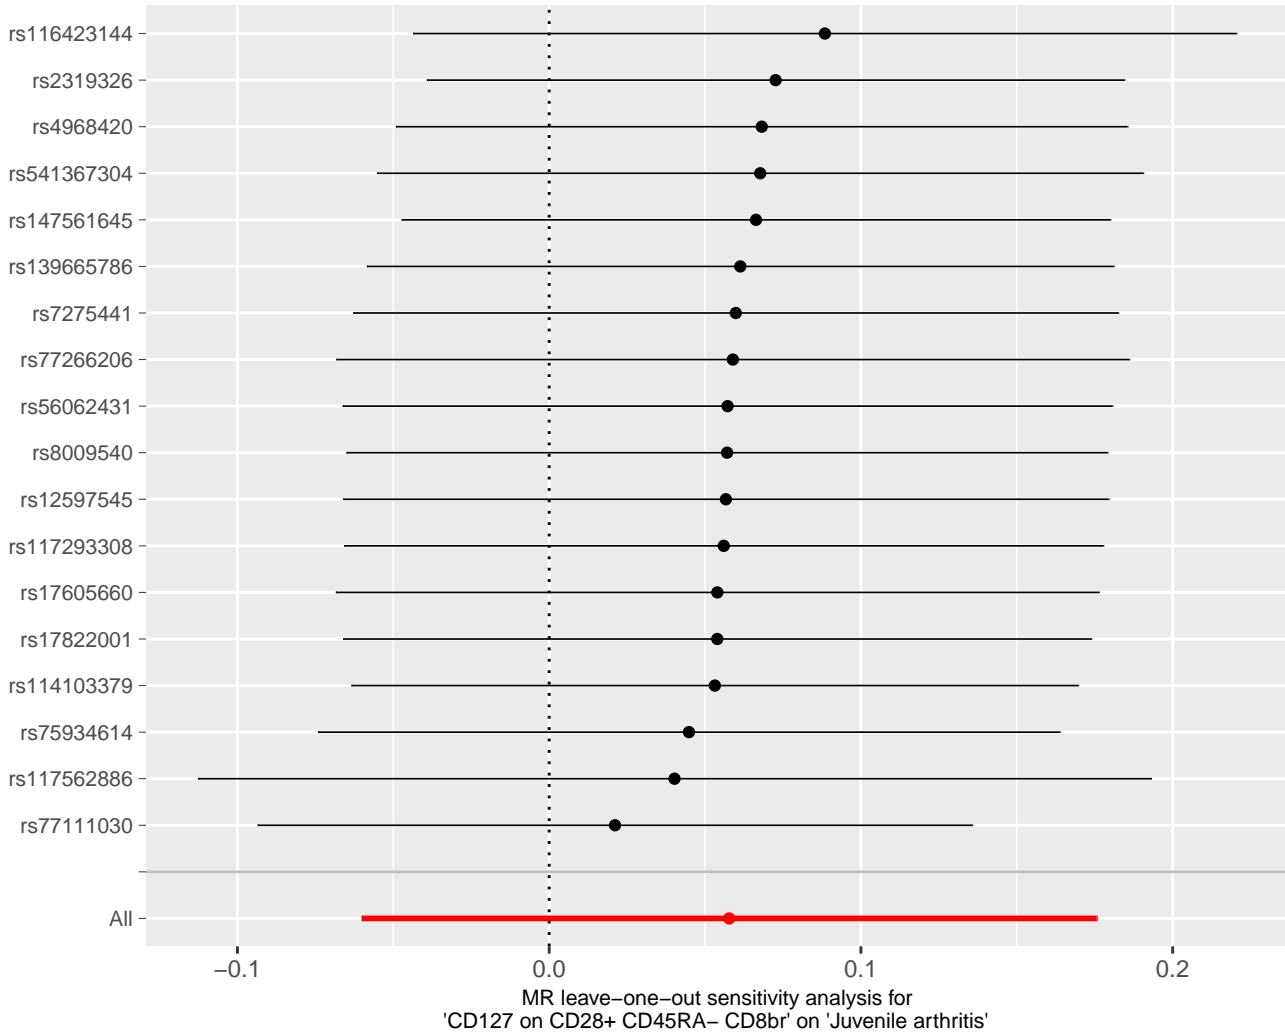

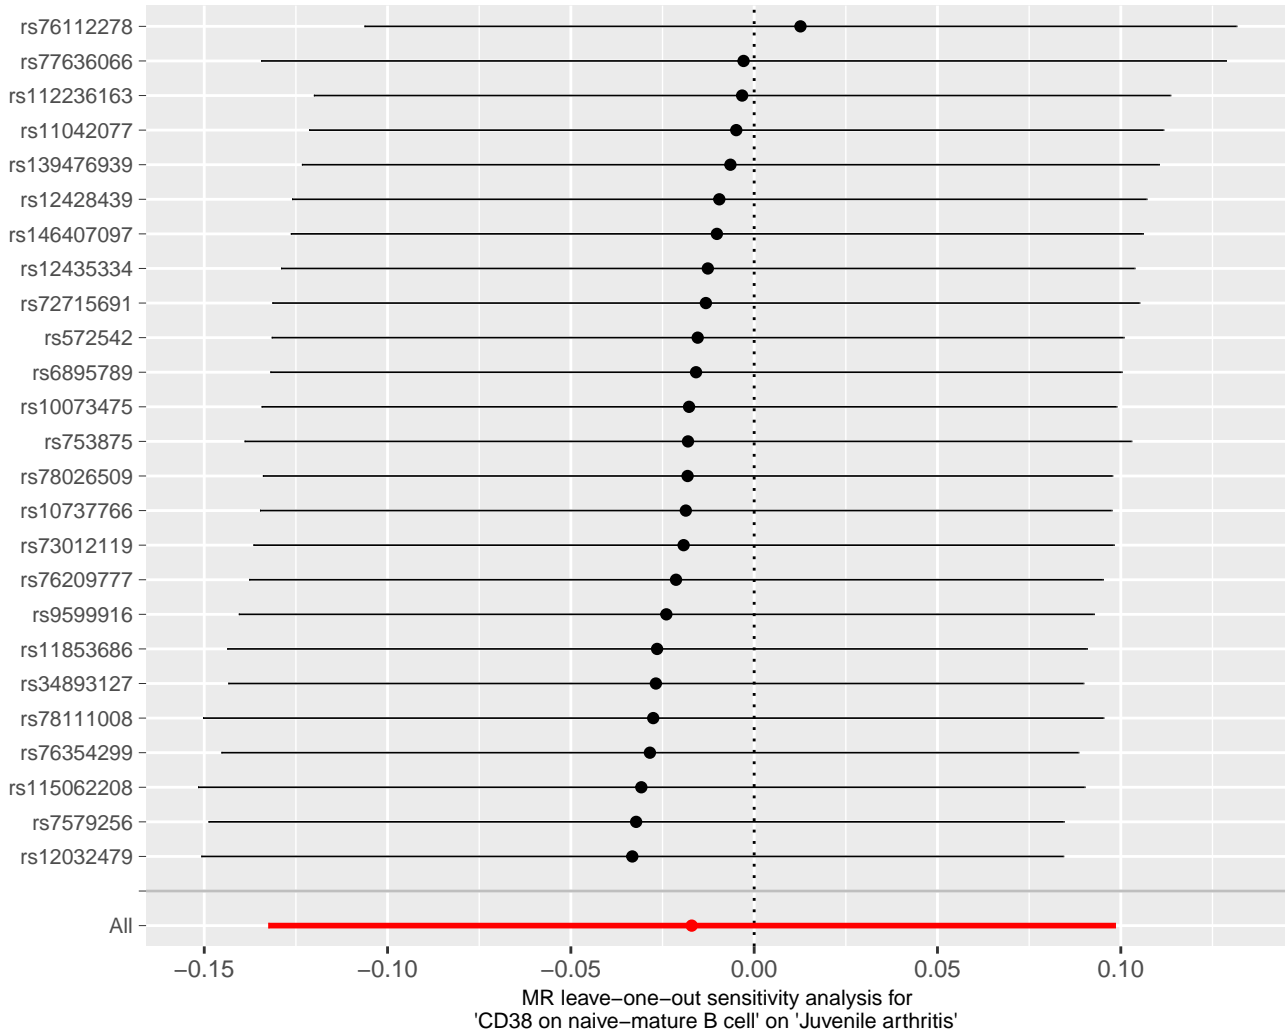

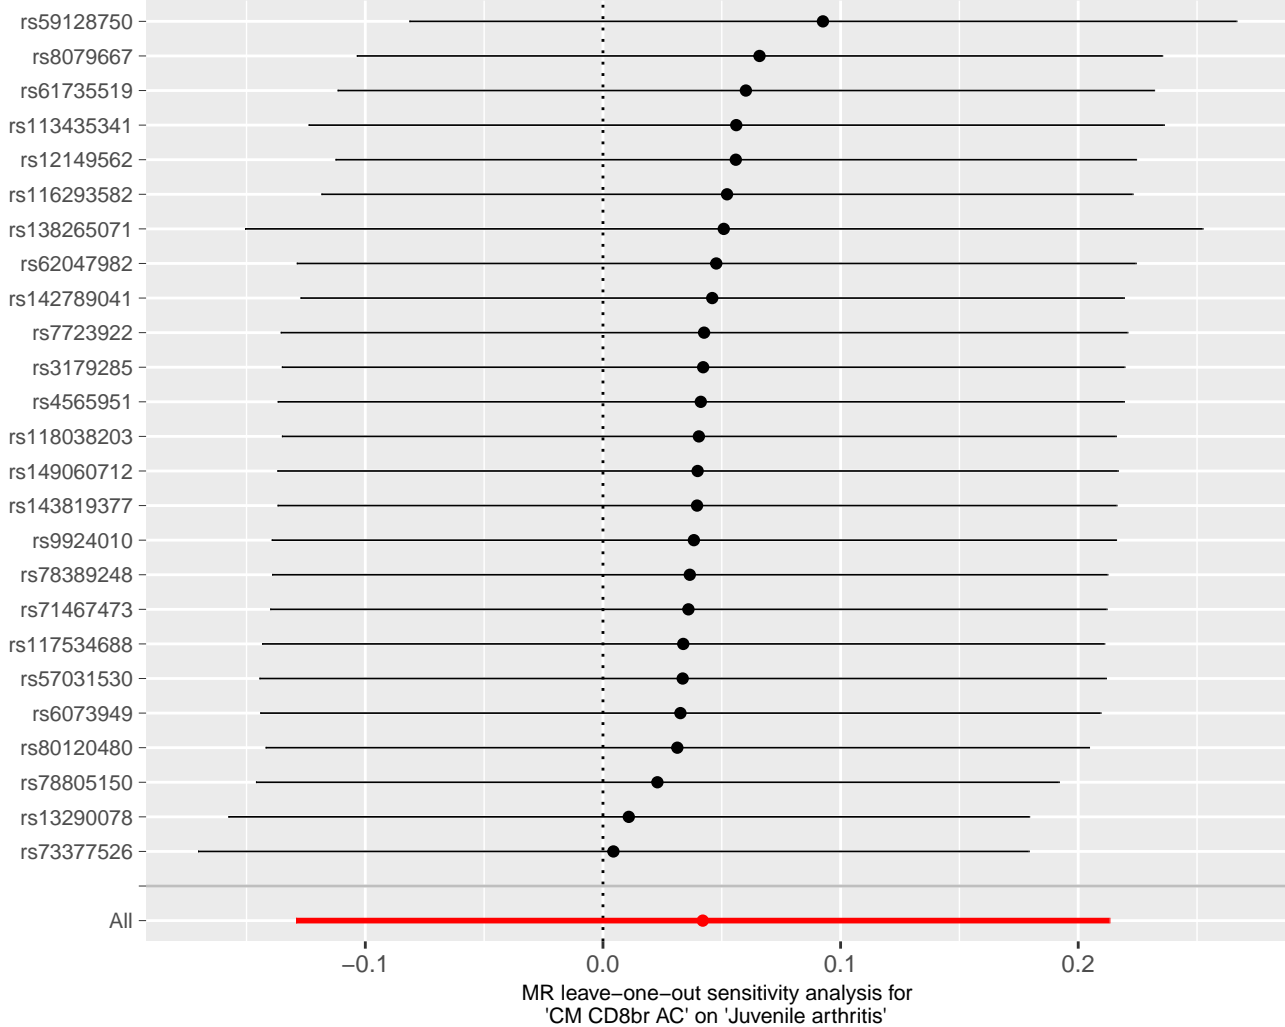

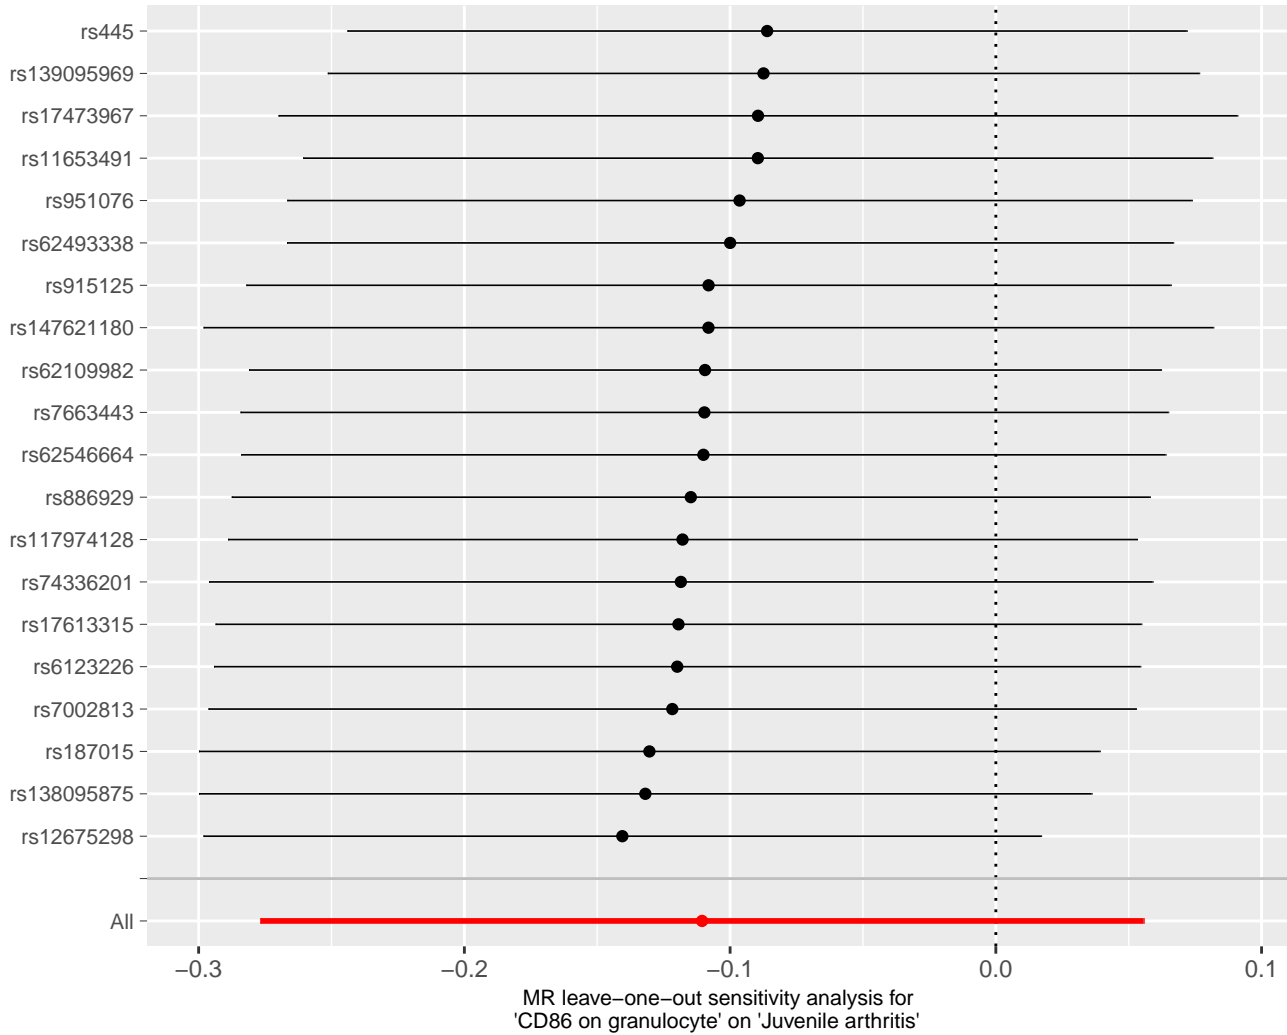

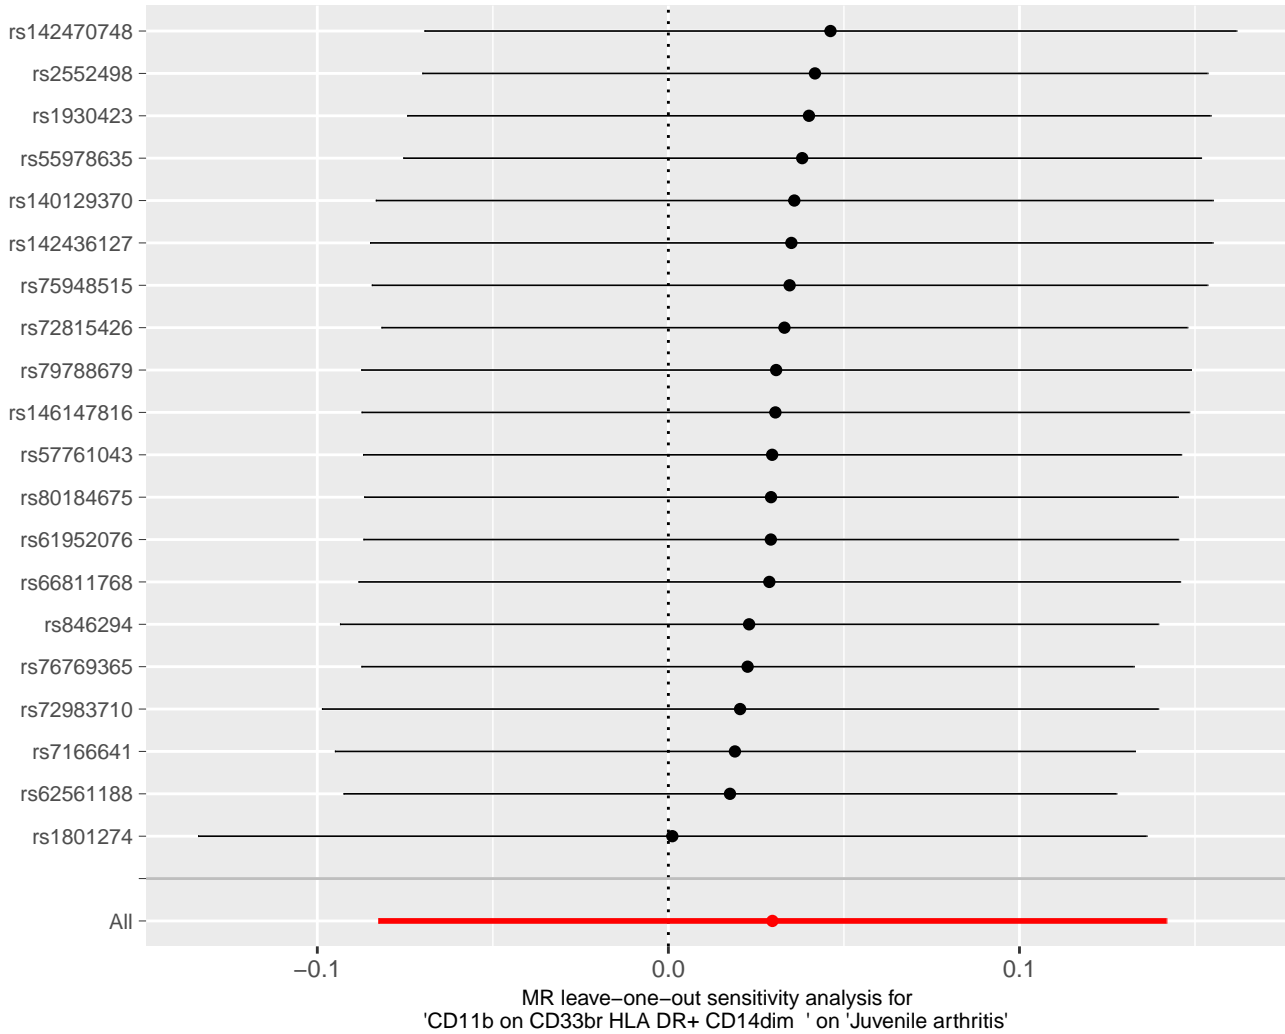

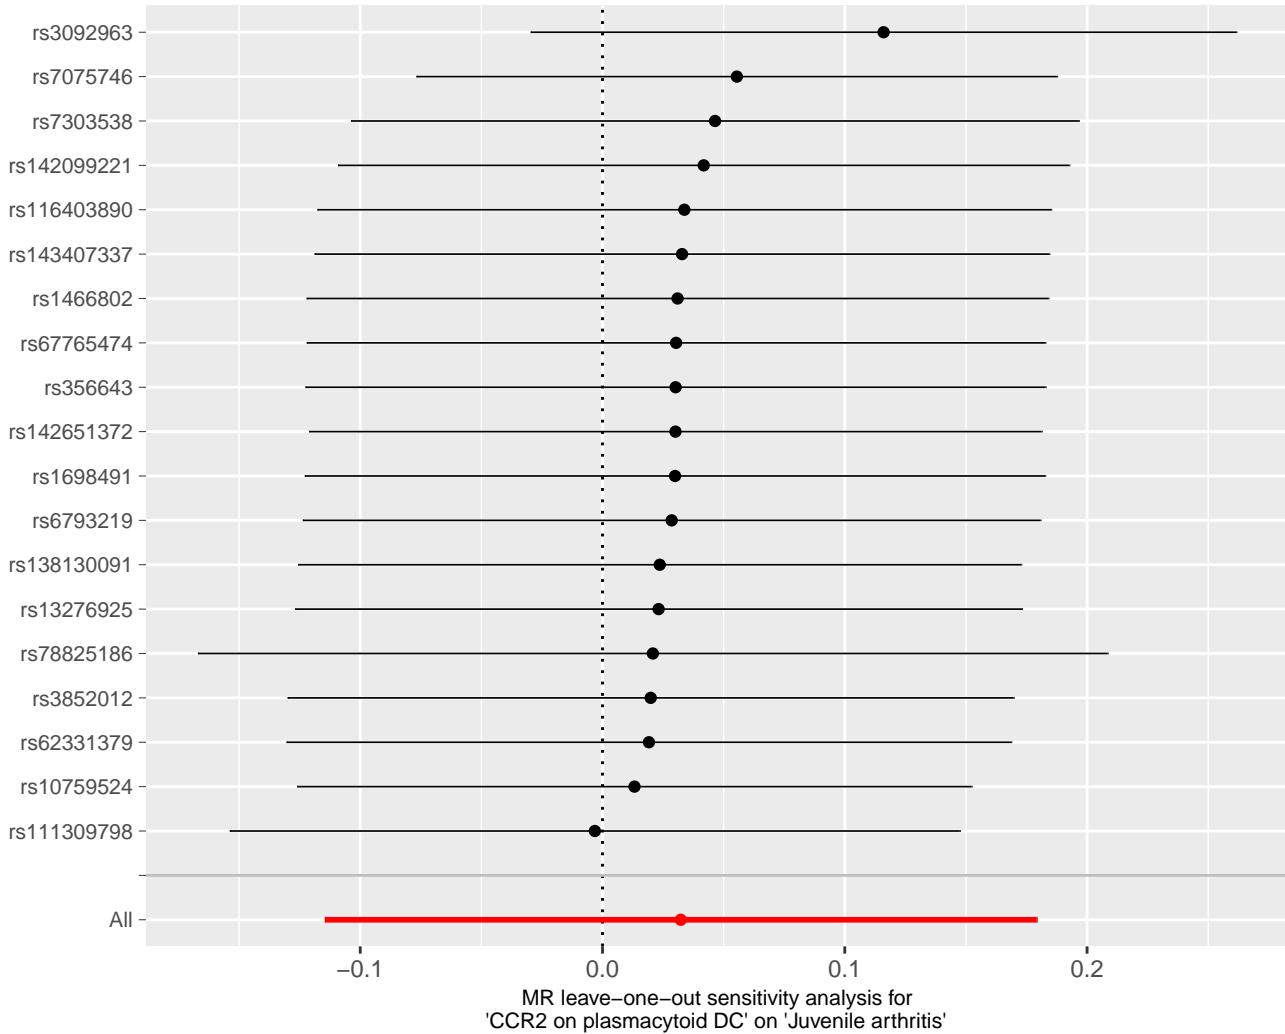

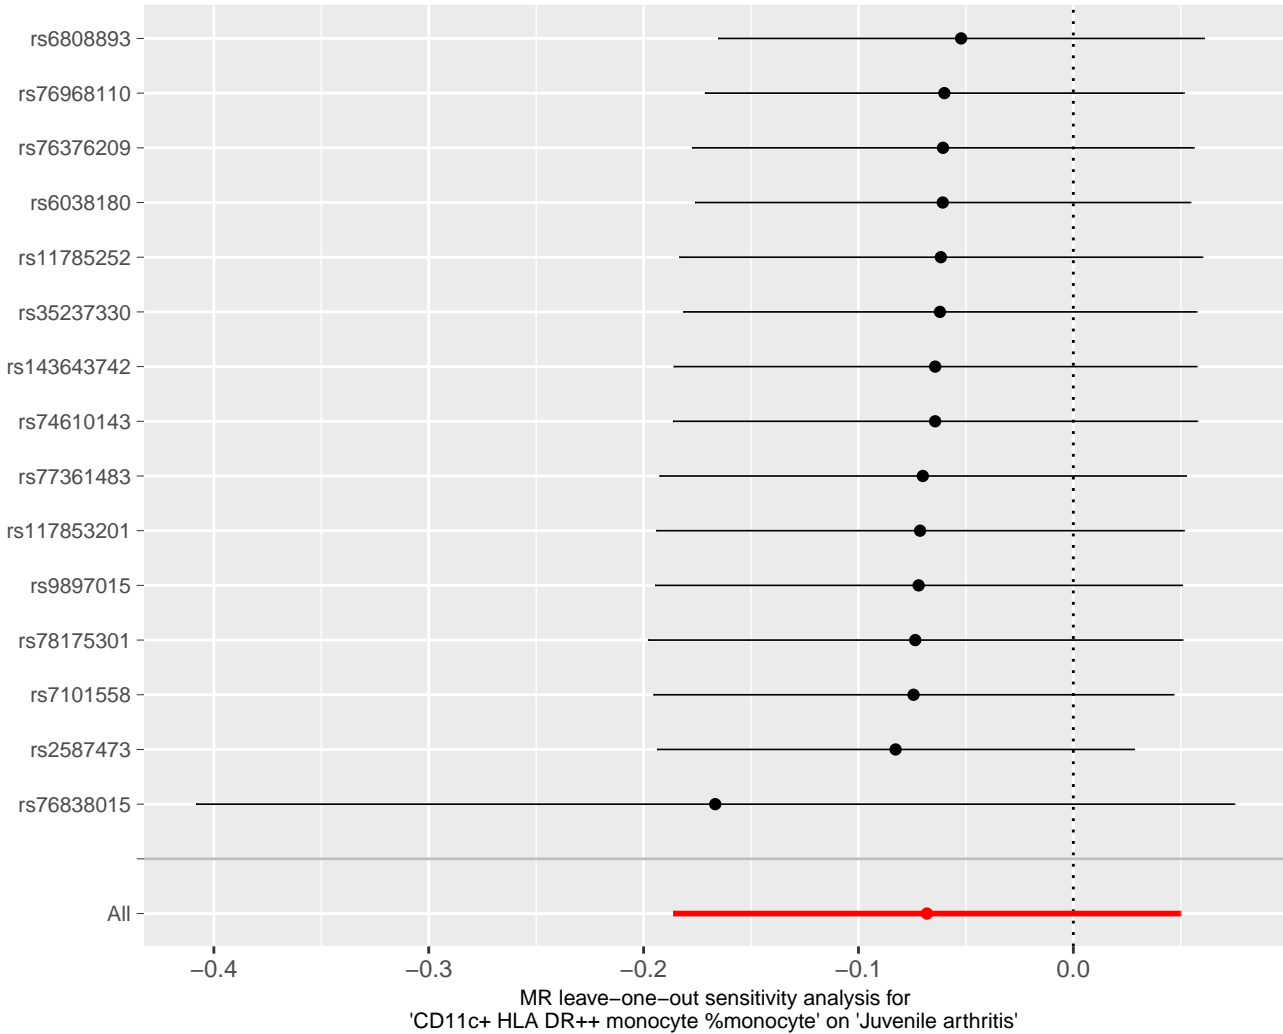



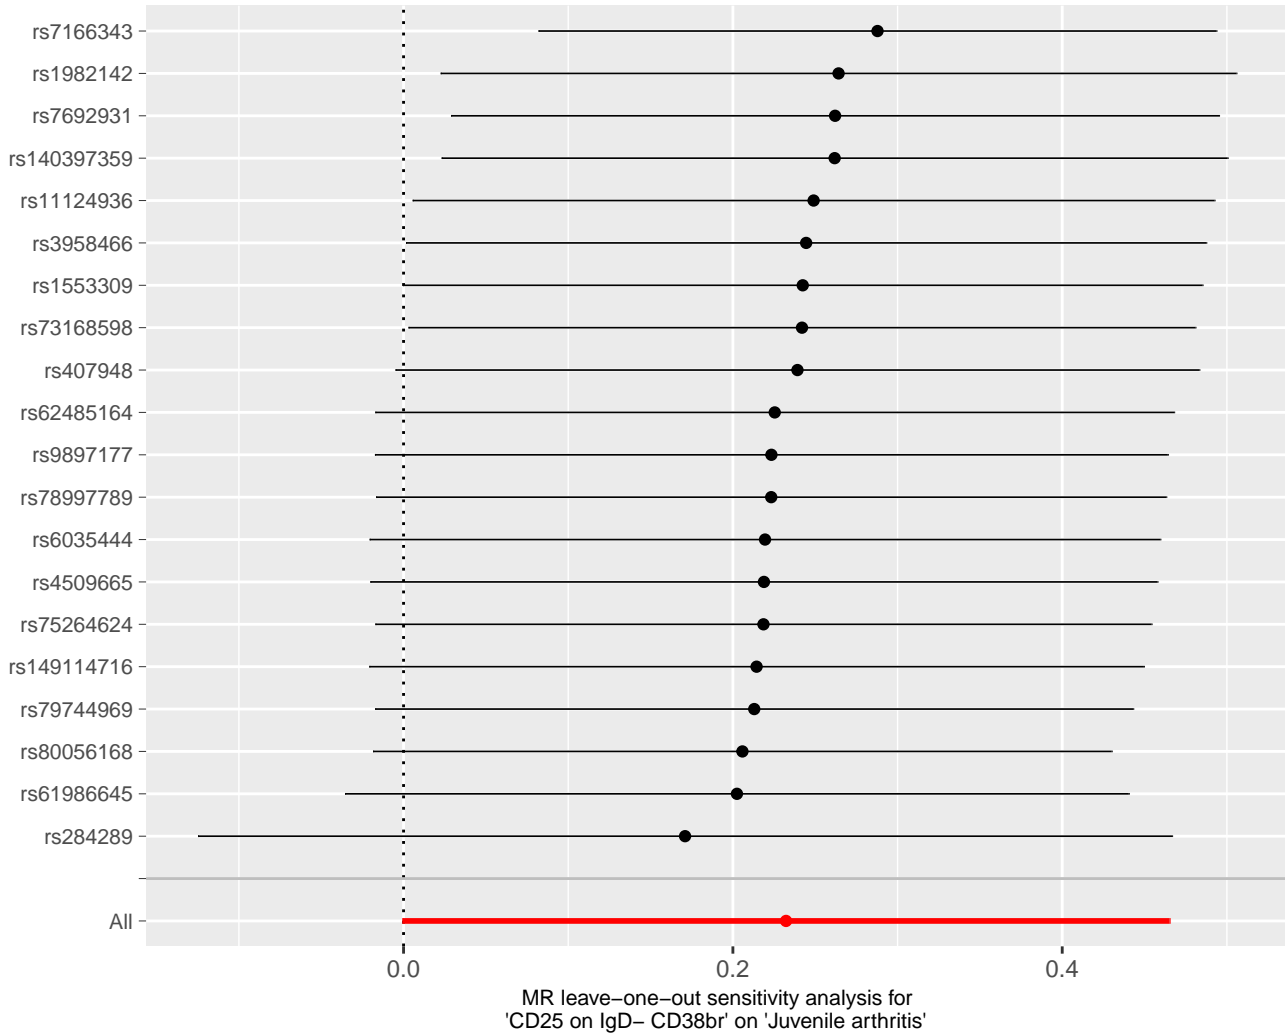

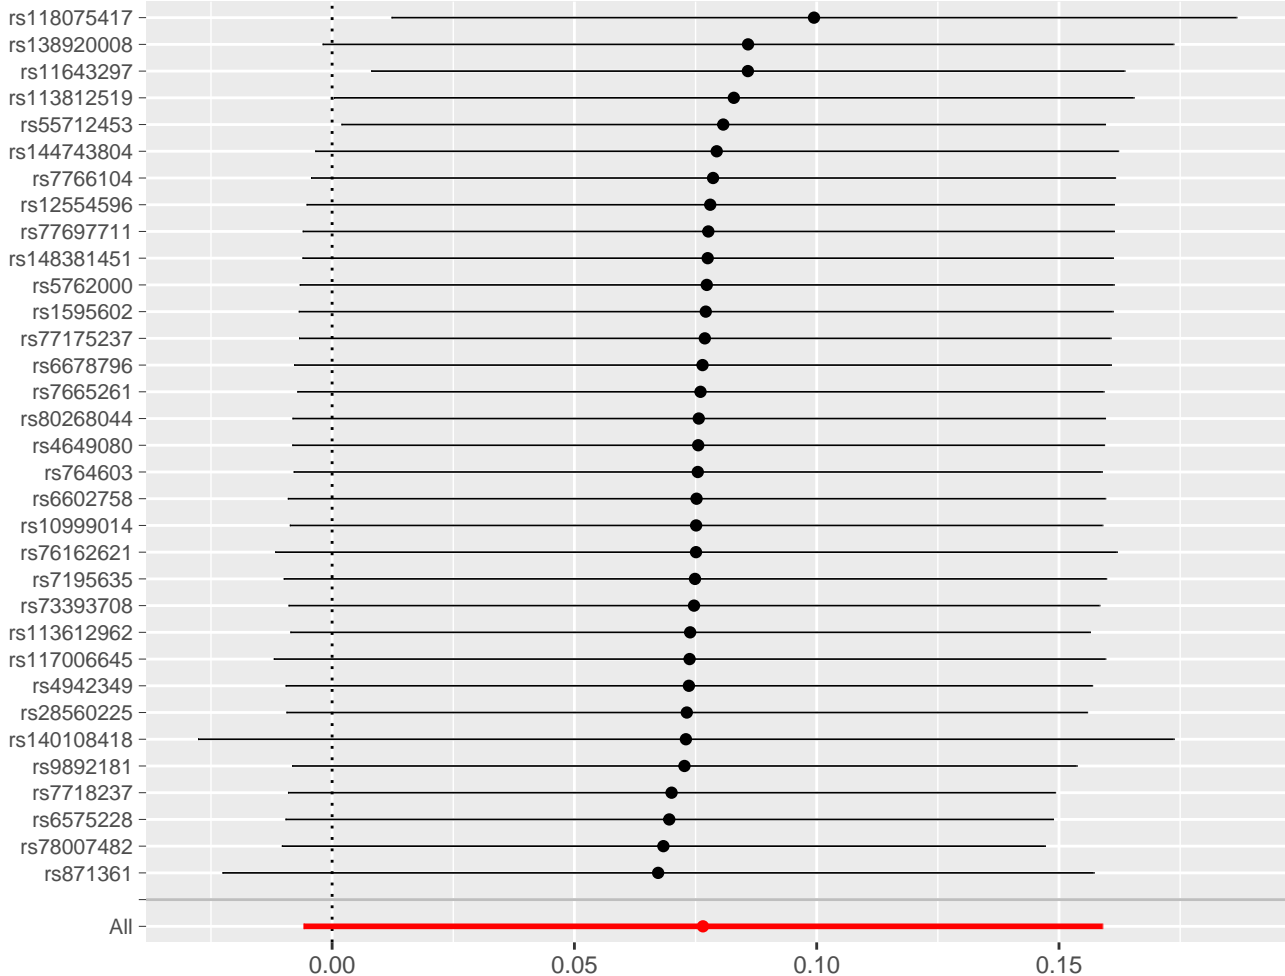

MR leave-one-out sensitivity analysis for 'CD19 on IgD+ CD24+' on 'Juvenile arthritis'

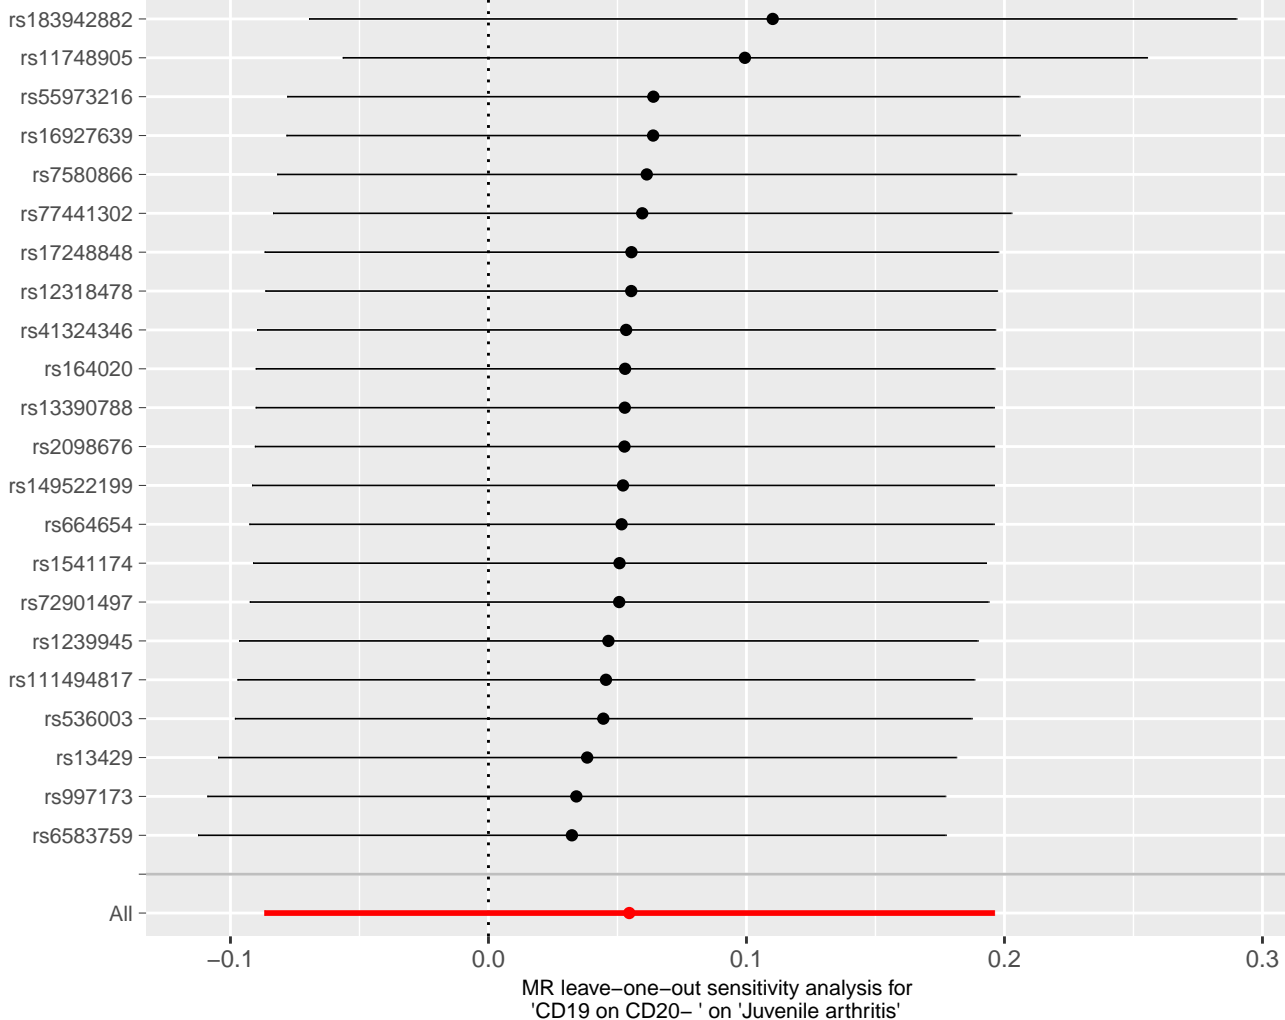

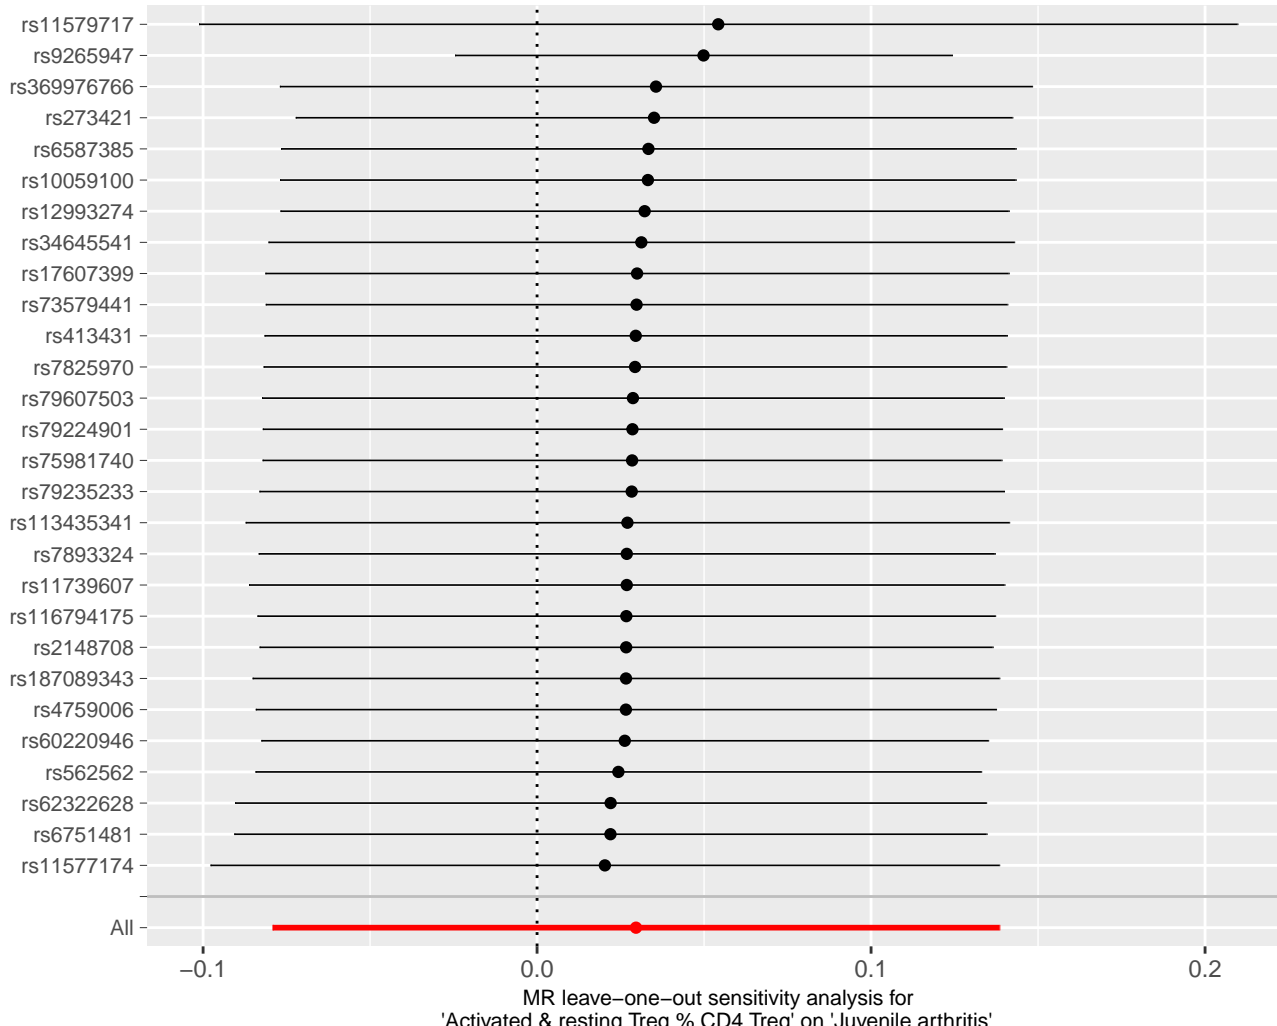

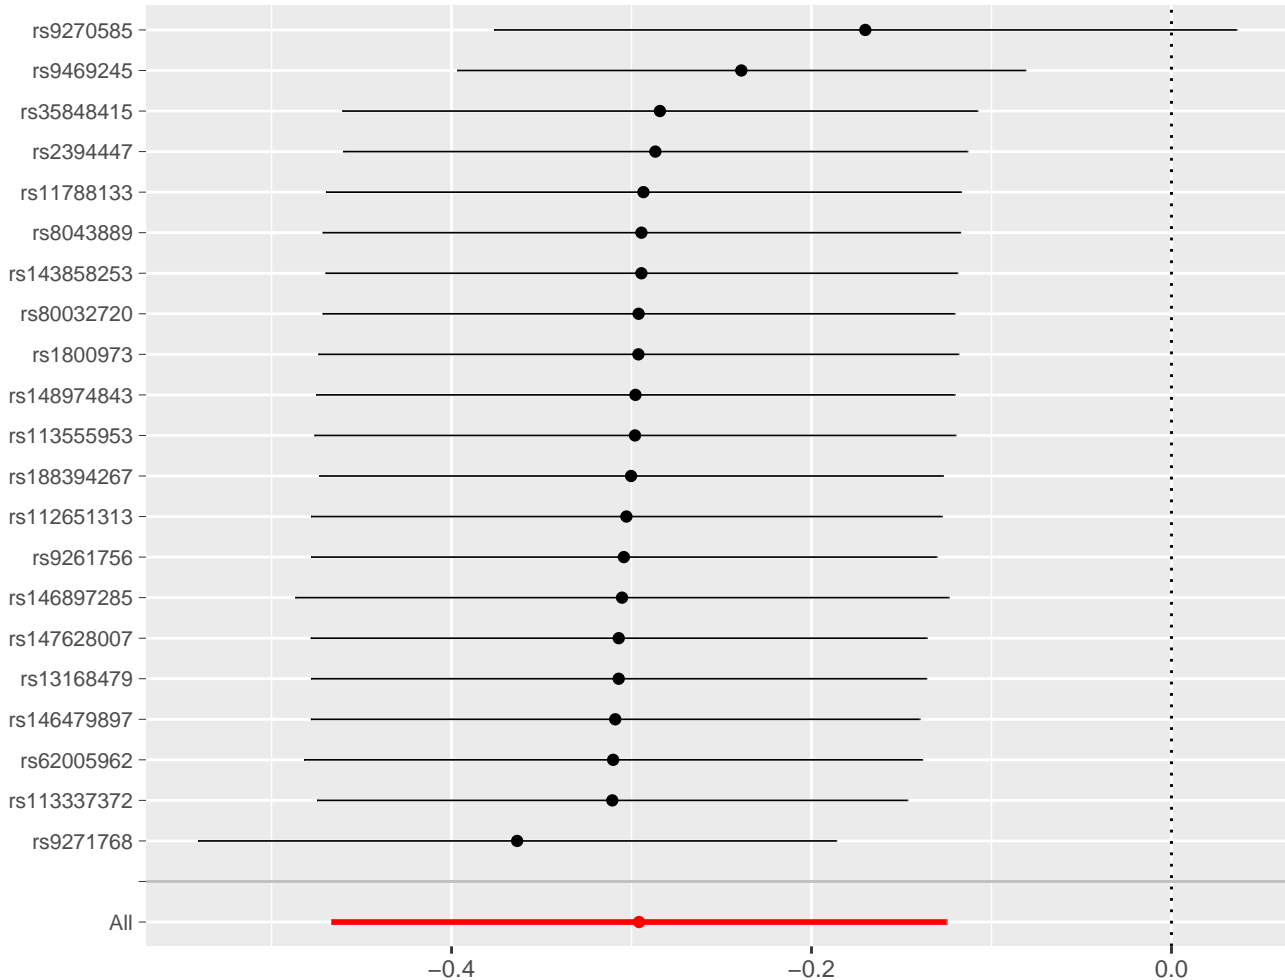

MR leave-one-out sensitivity analysis for  
'HLA DR on CD14+ monocyte' on 'Juvenile arthritis'

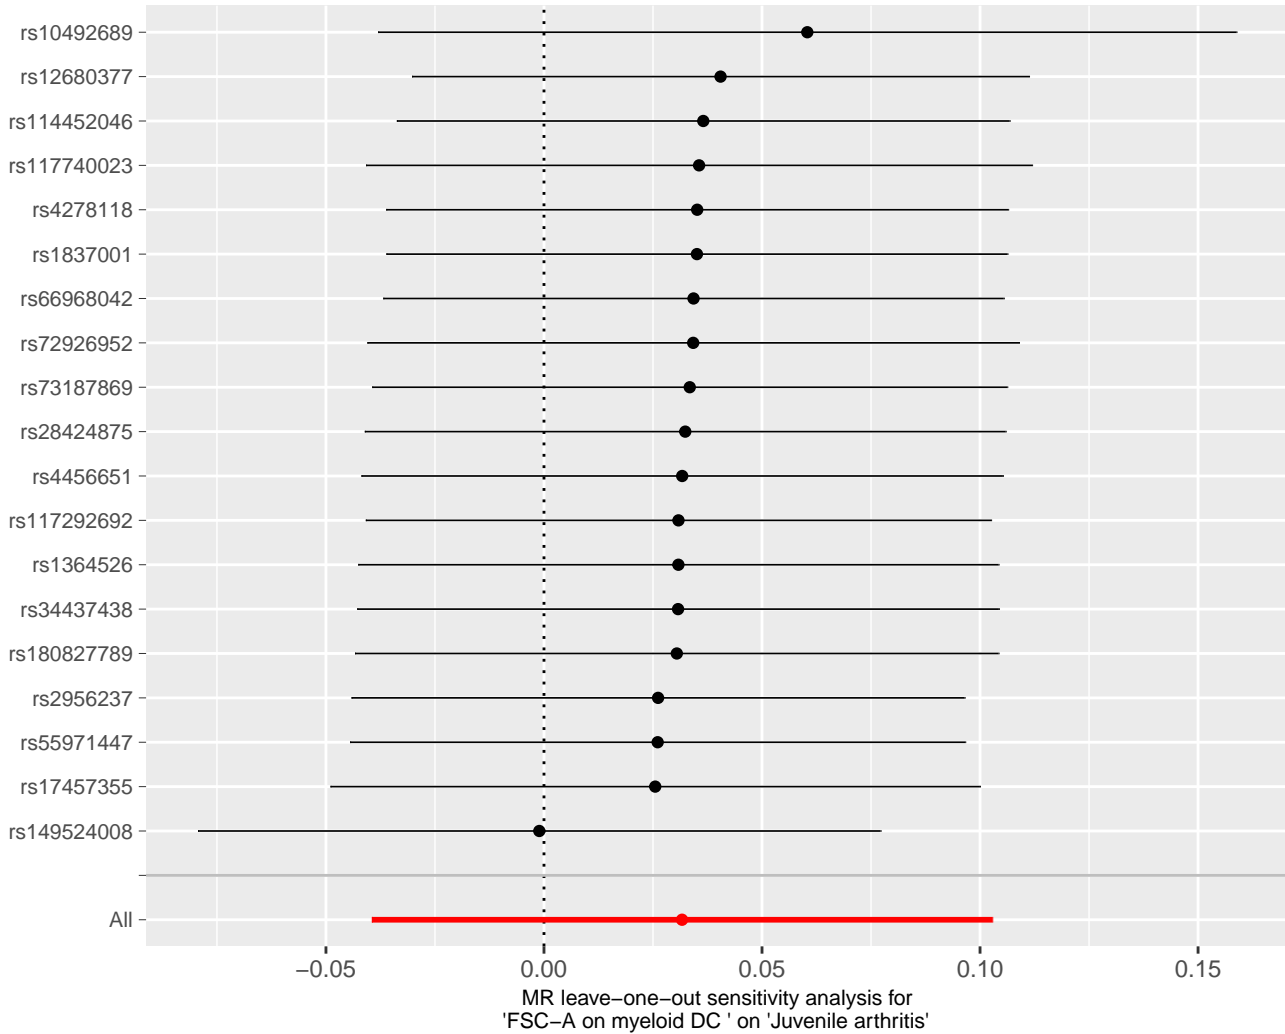

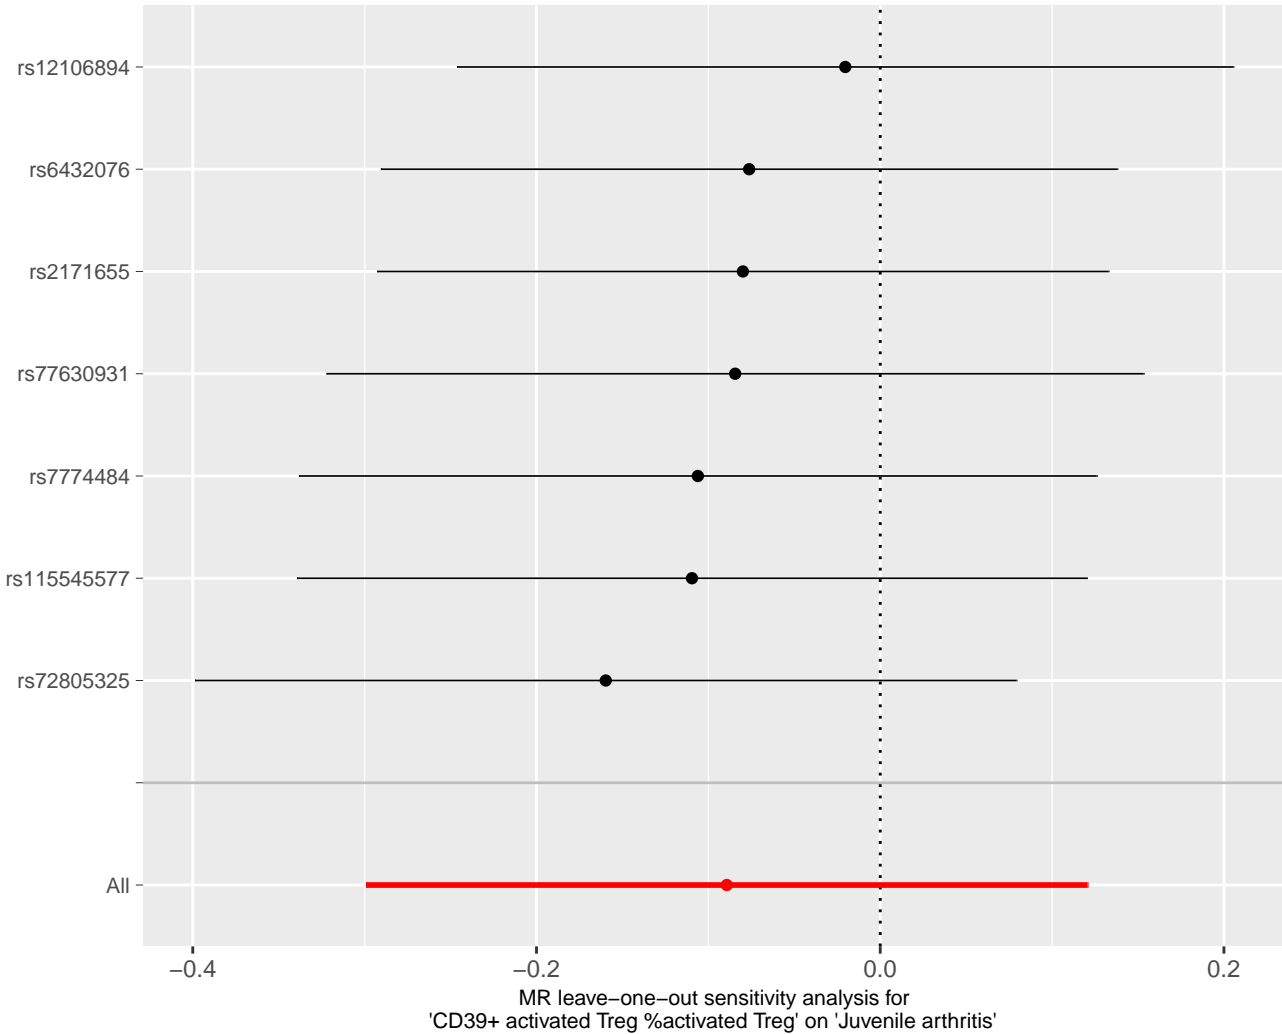

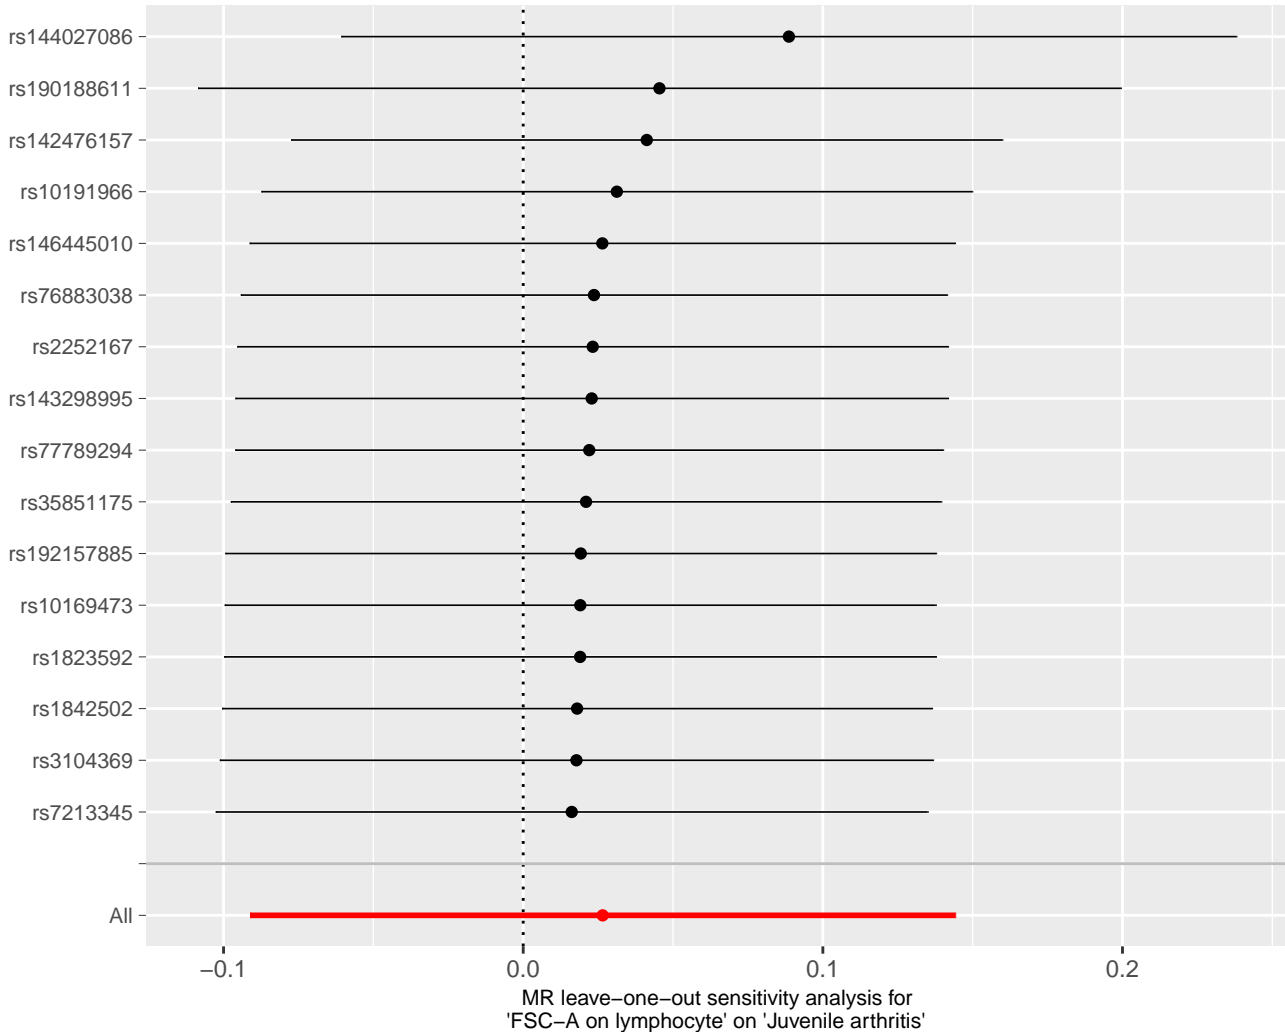



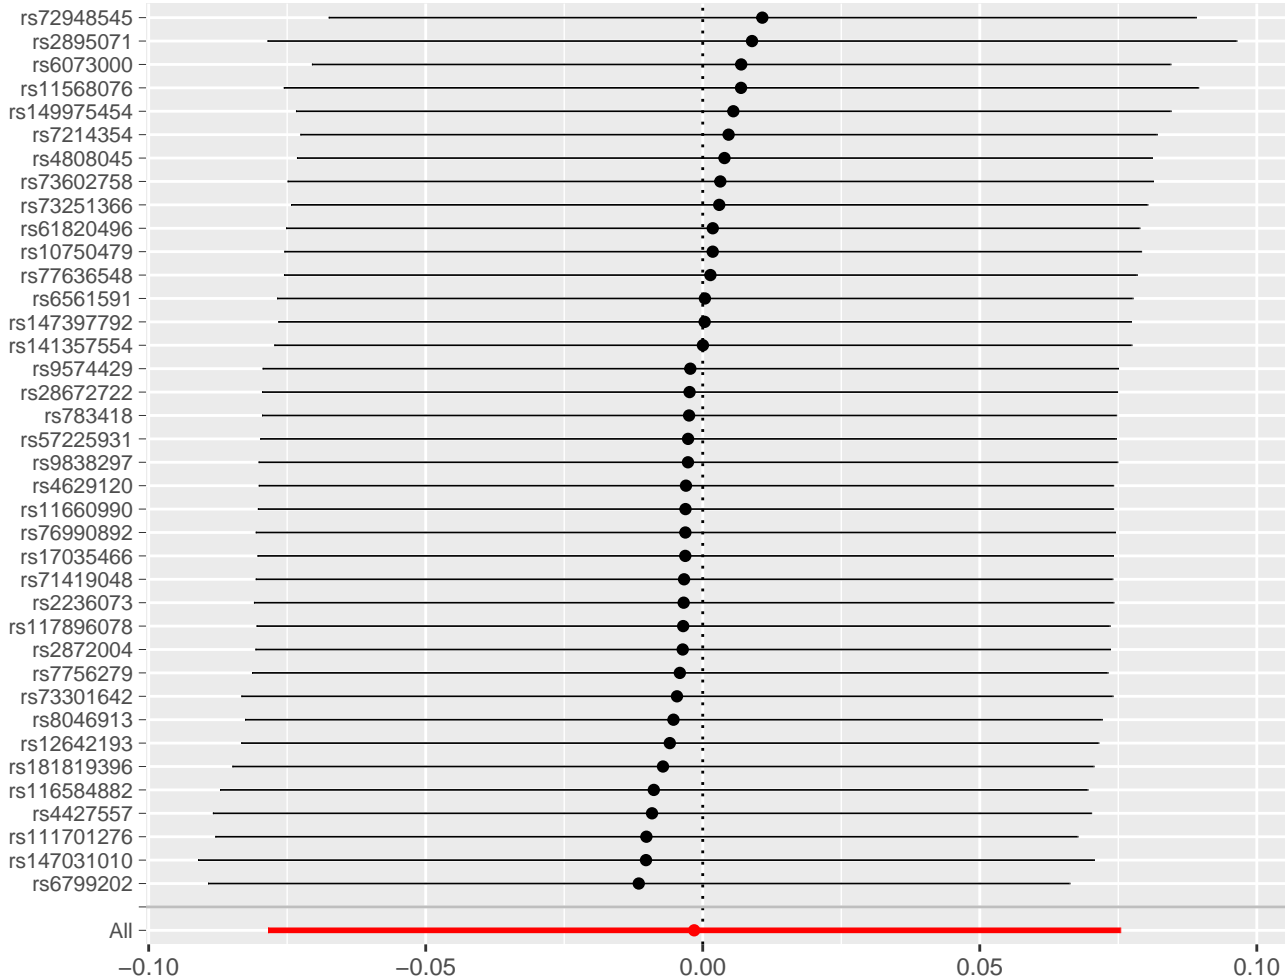

MR leave-one-out sensitivity analysis for 'CD24 on sw mem' on 'Juvenile arthritis'

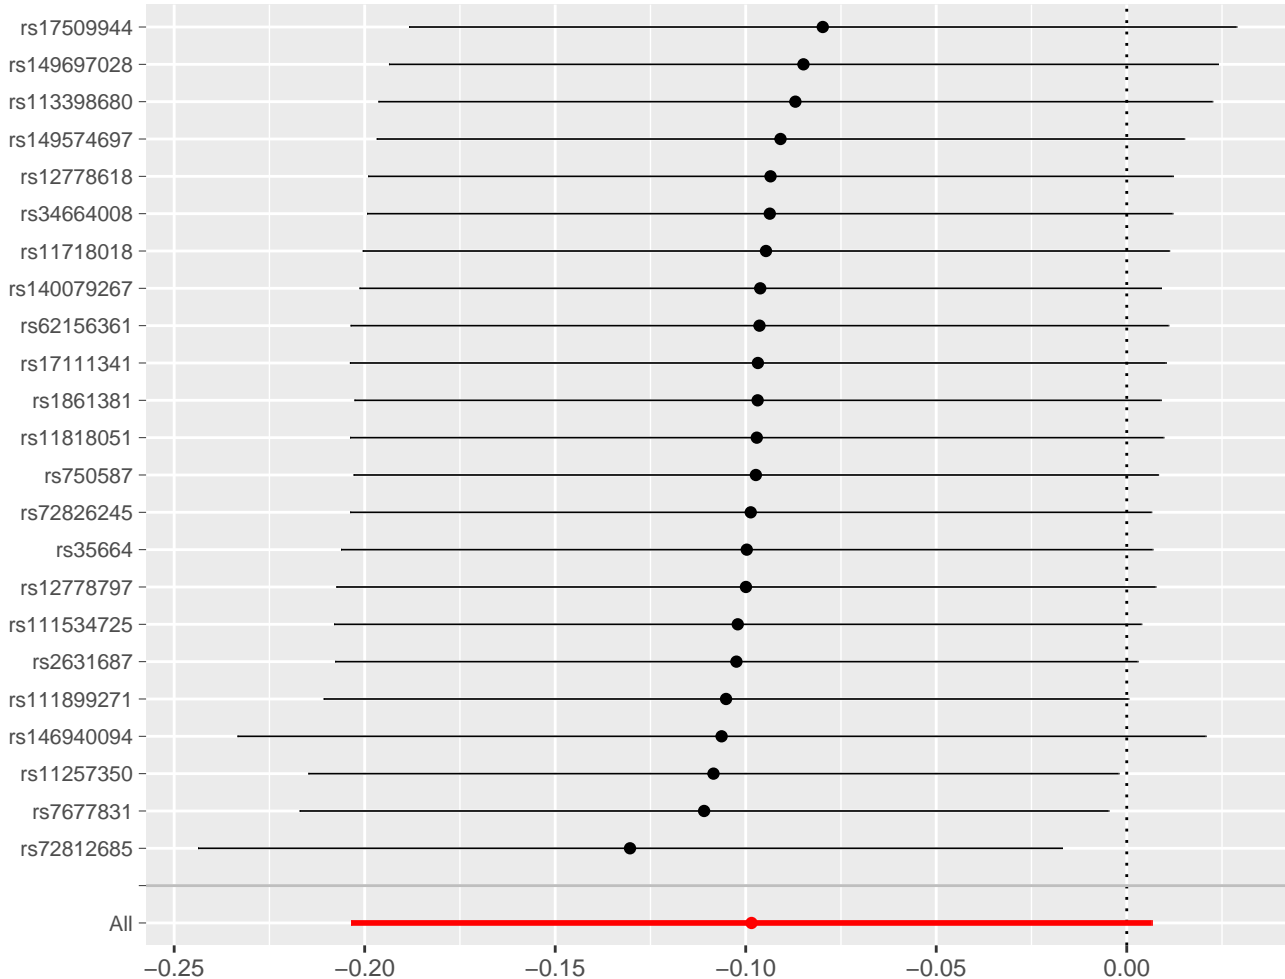

MR leave-one-out sensitivity analysis for 'CD39+ CD8br AC' on 'Juvenile arthritis'

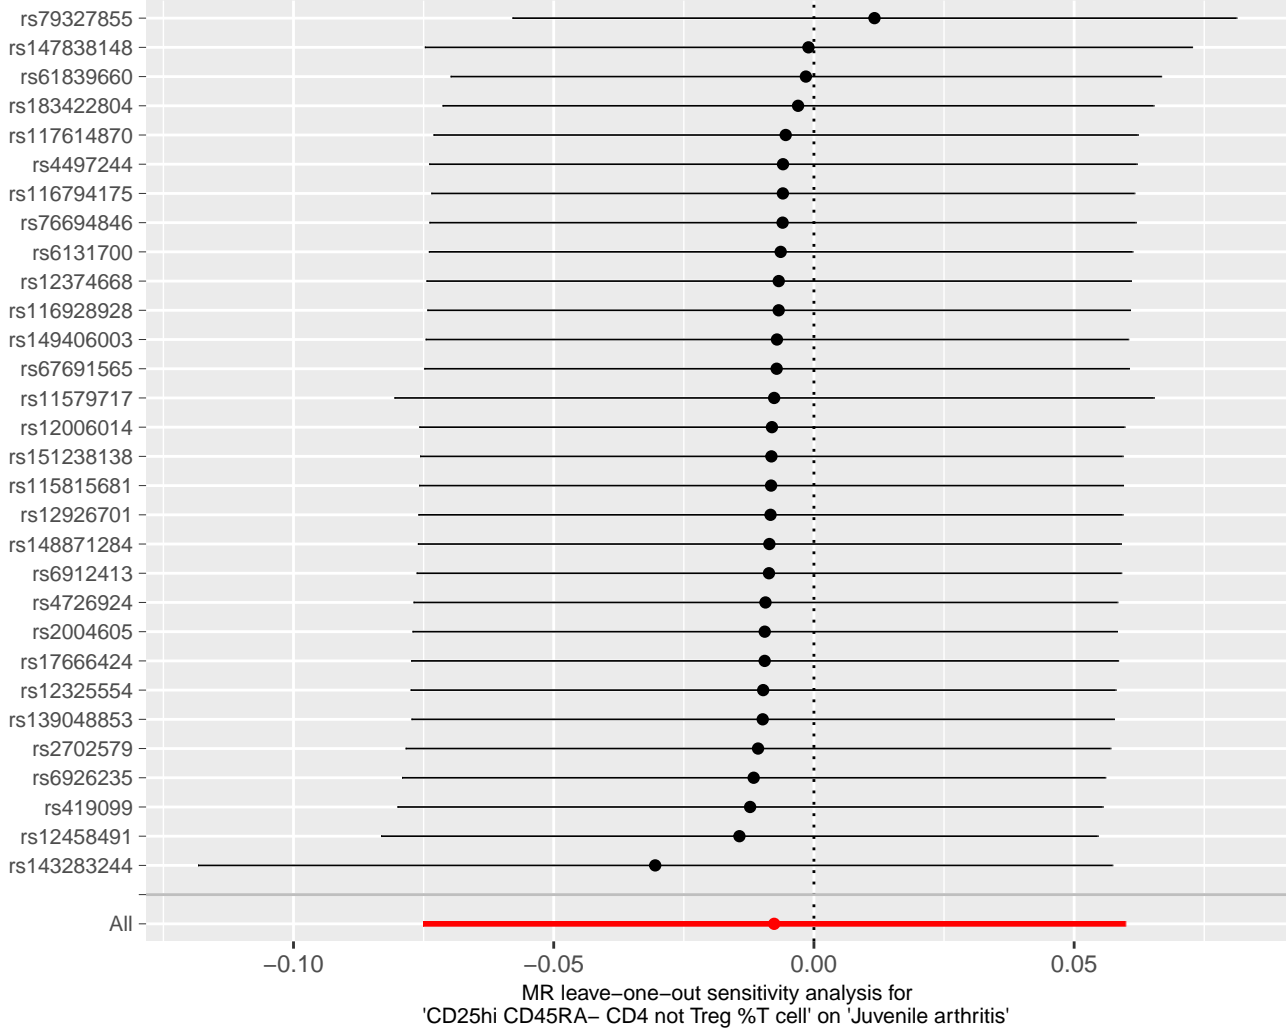

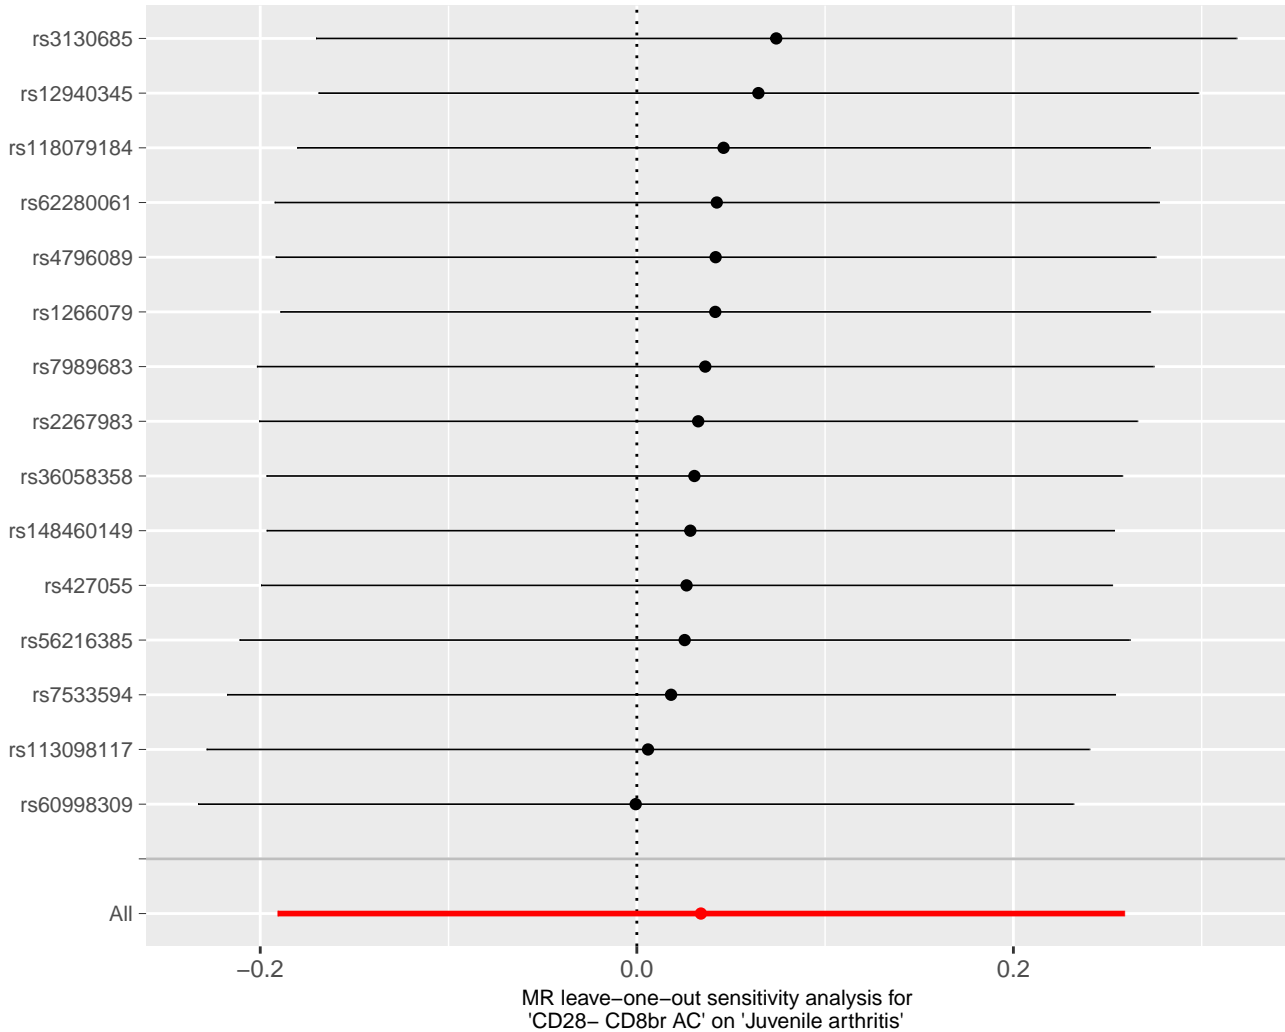

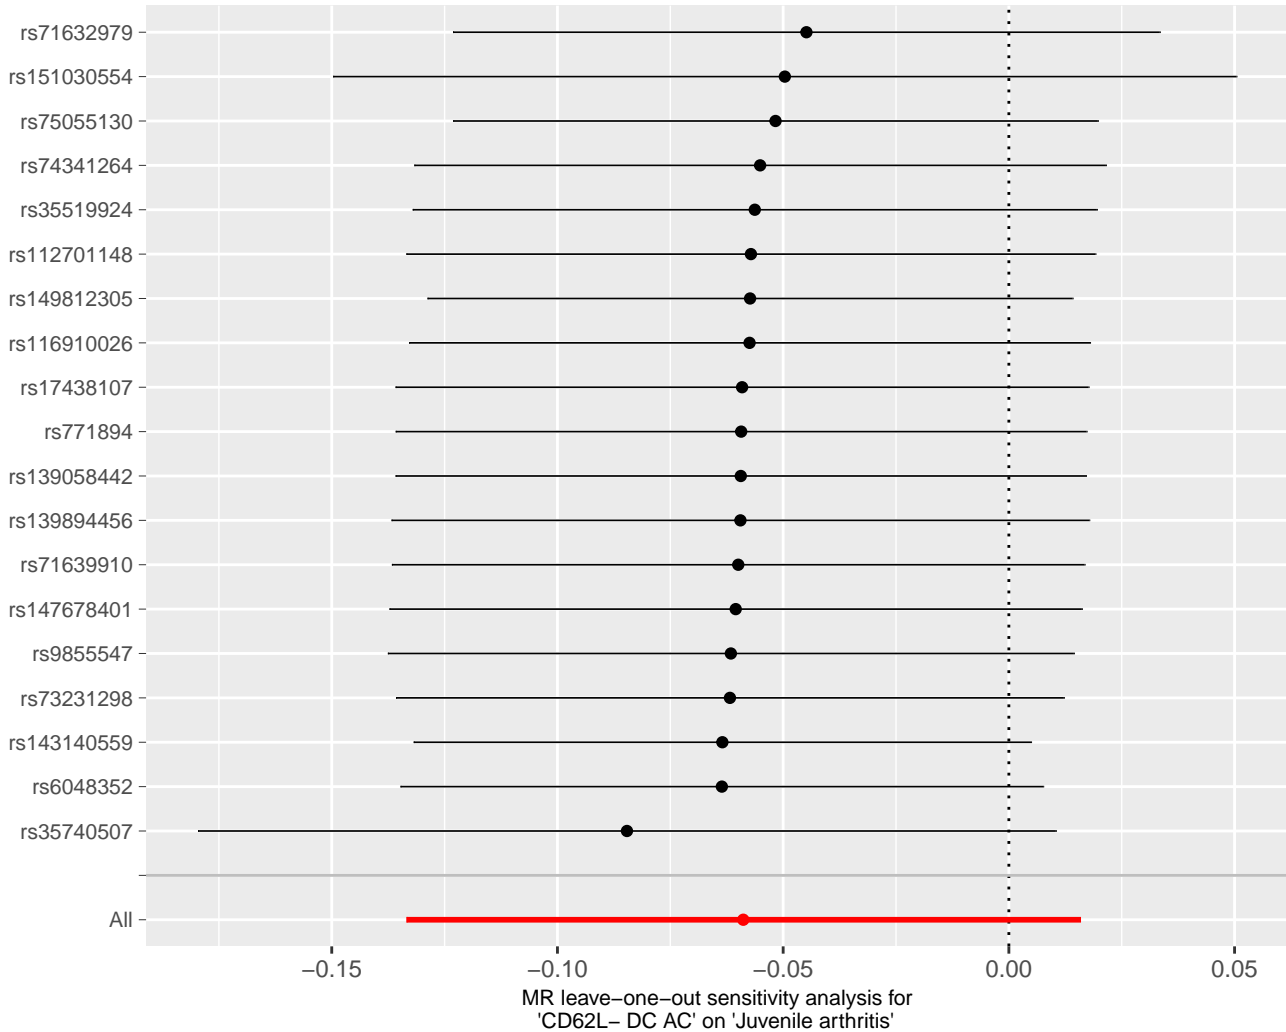

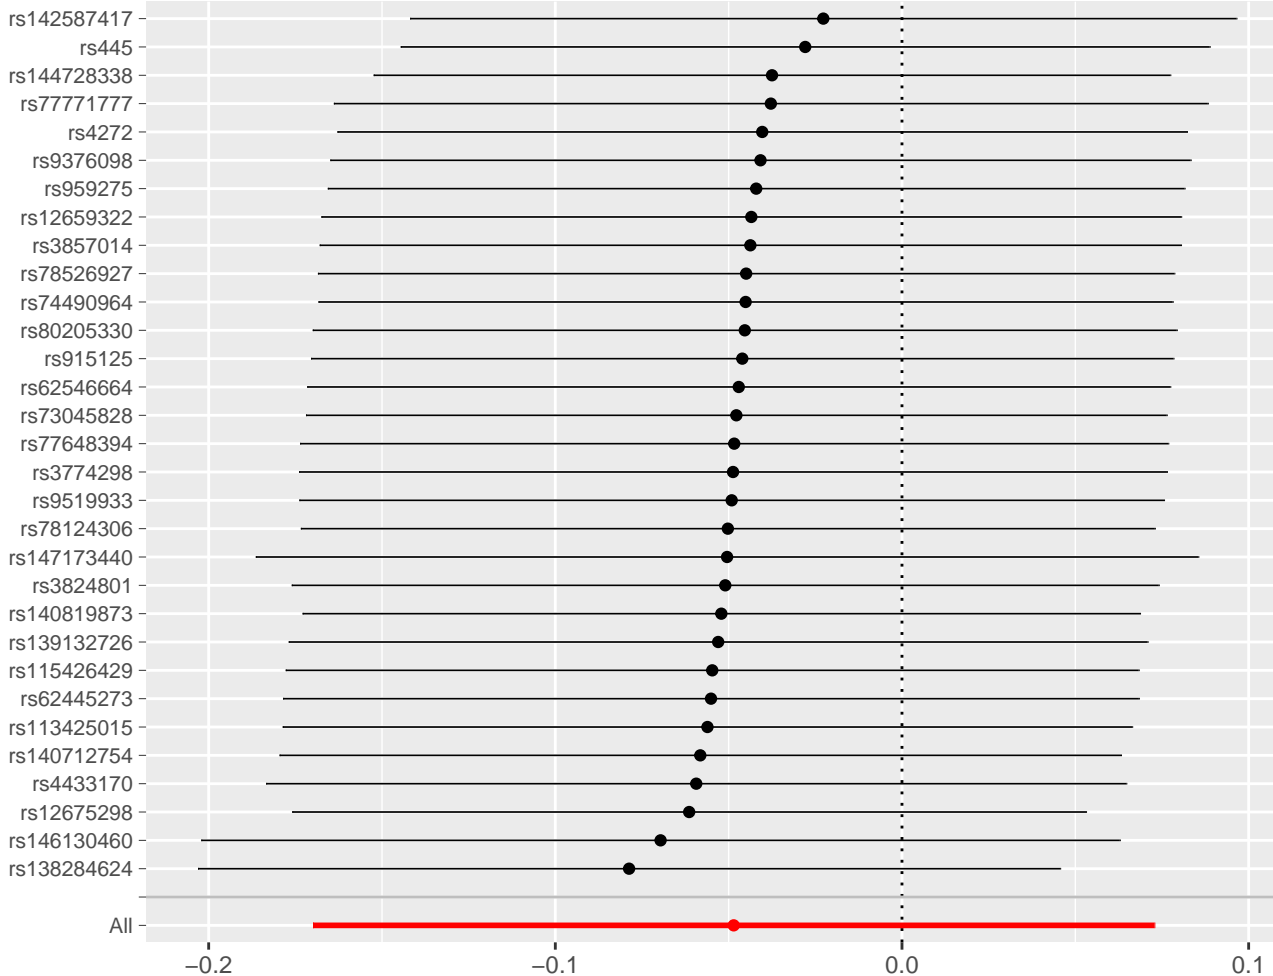

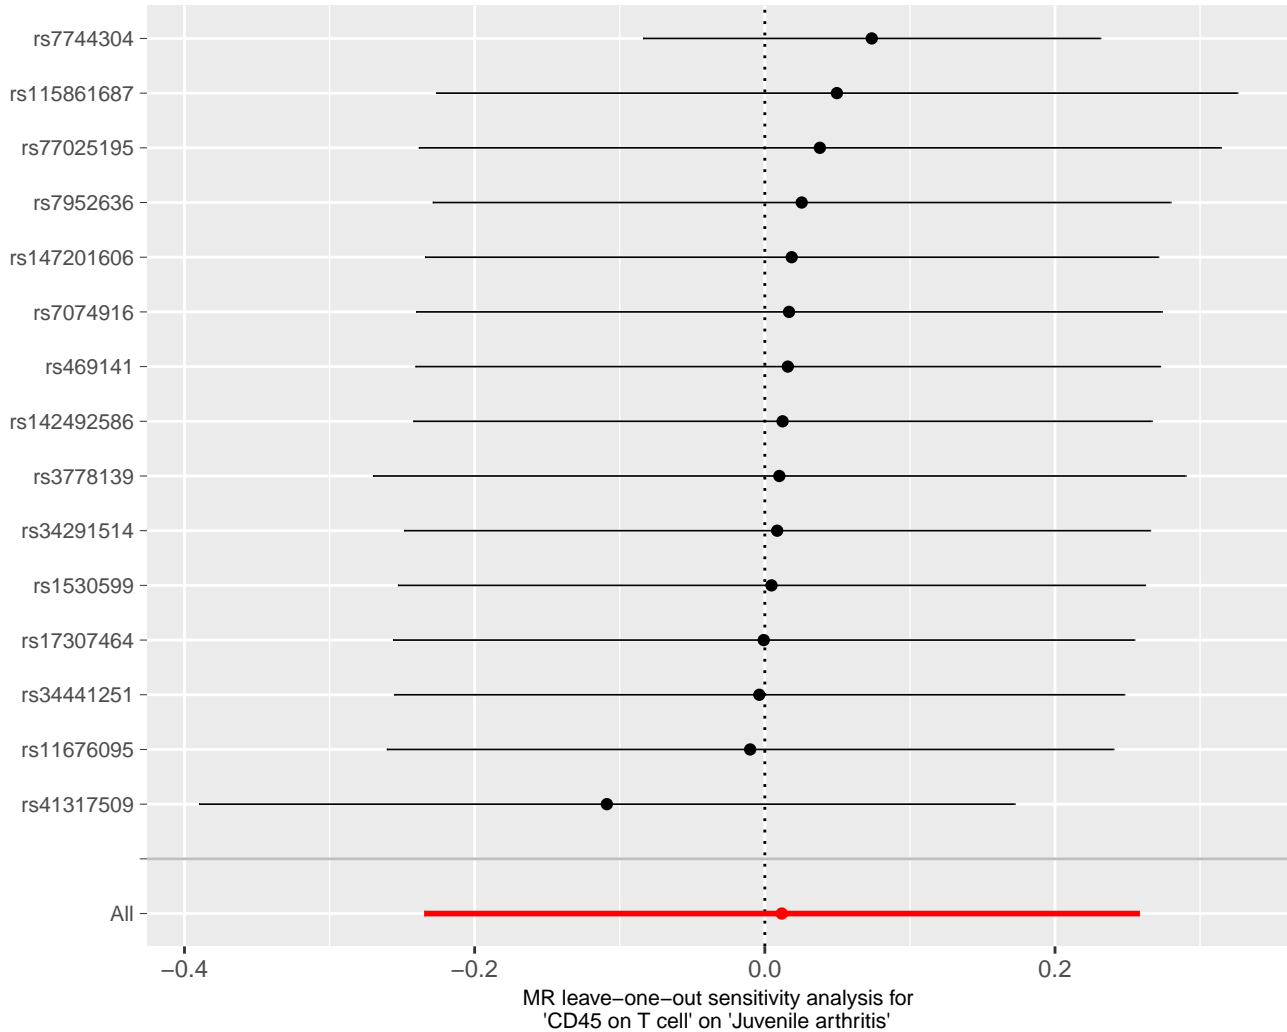

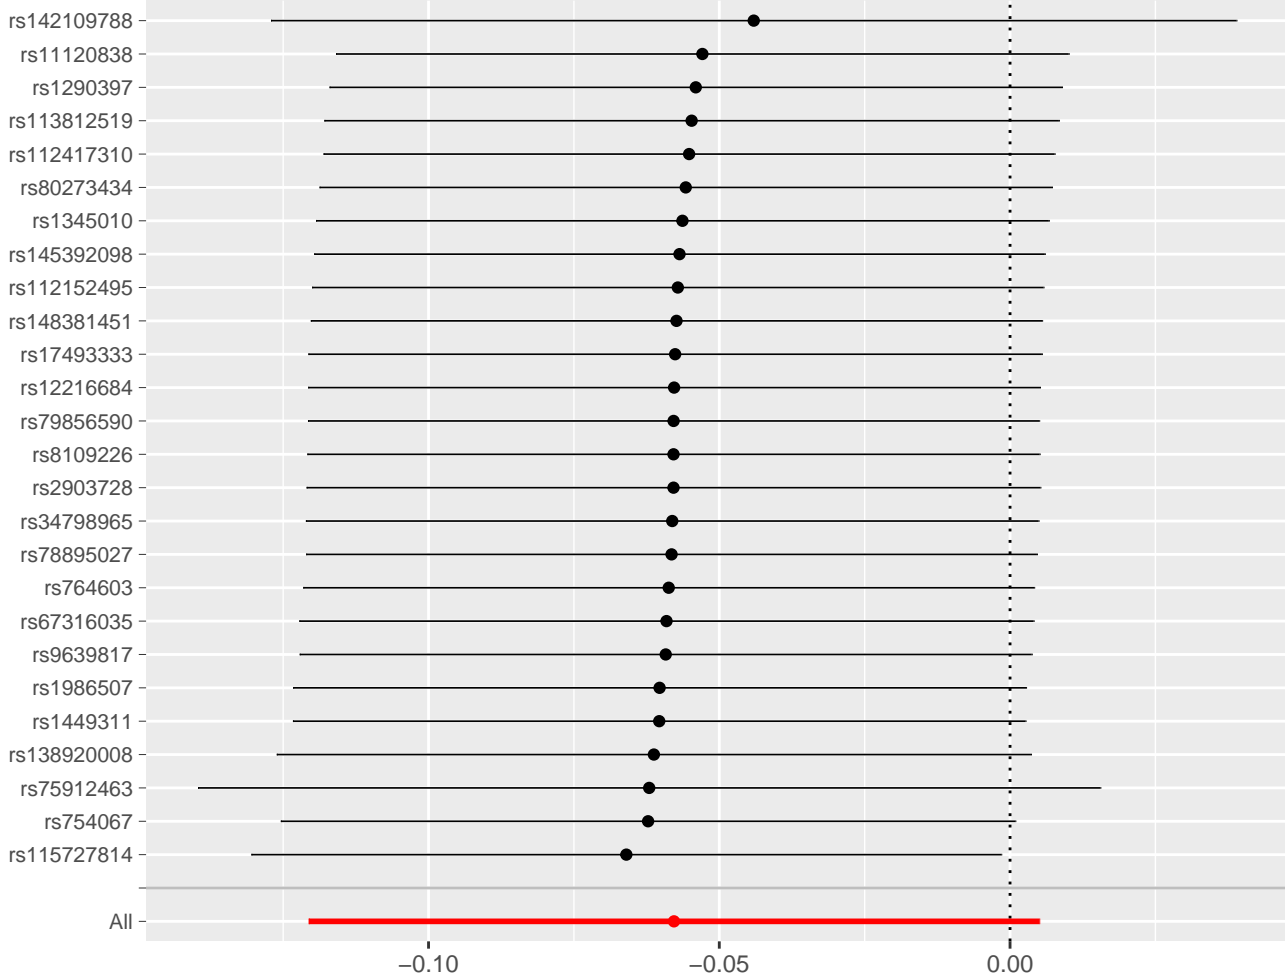

MR leave-one-out sensitivity analysis for 'CD19 on IgD+ CD24-' on 'Juvenile arthritis'



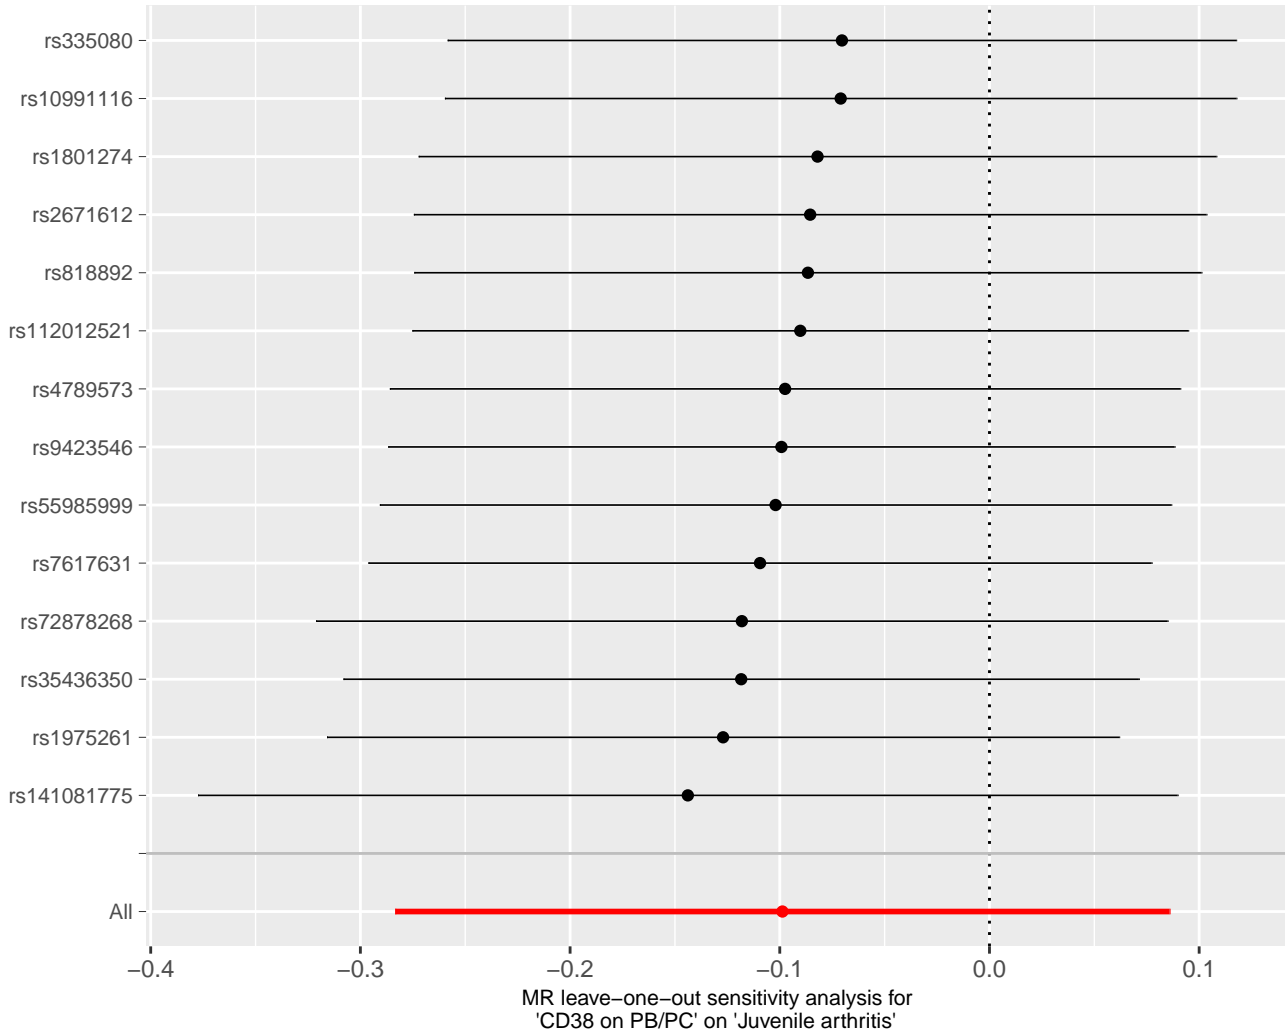

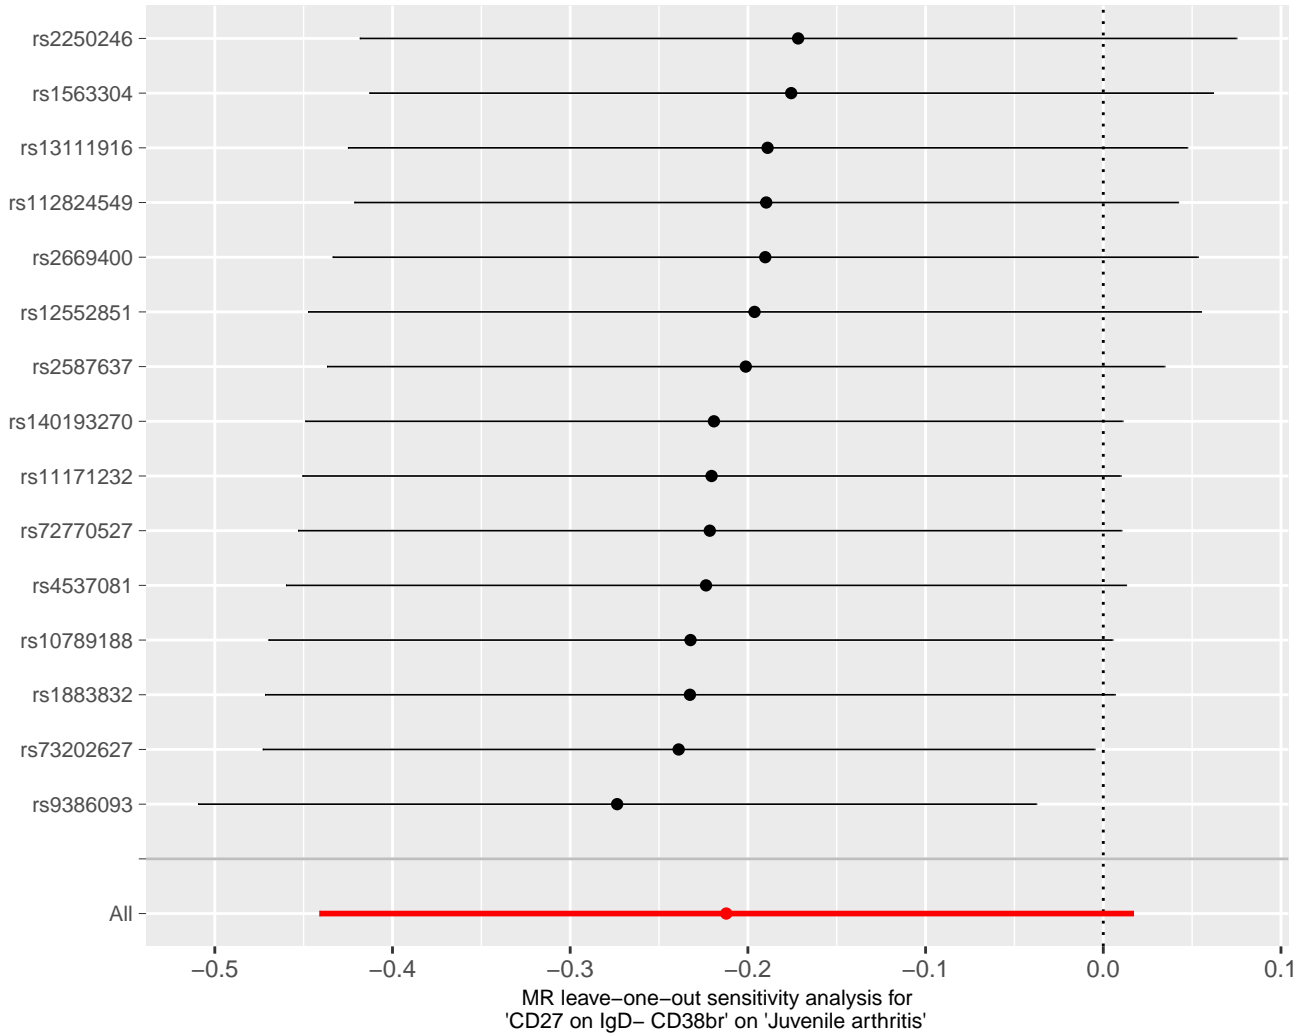

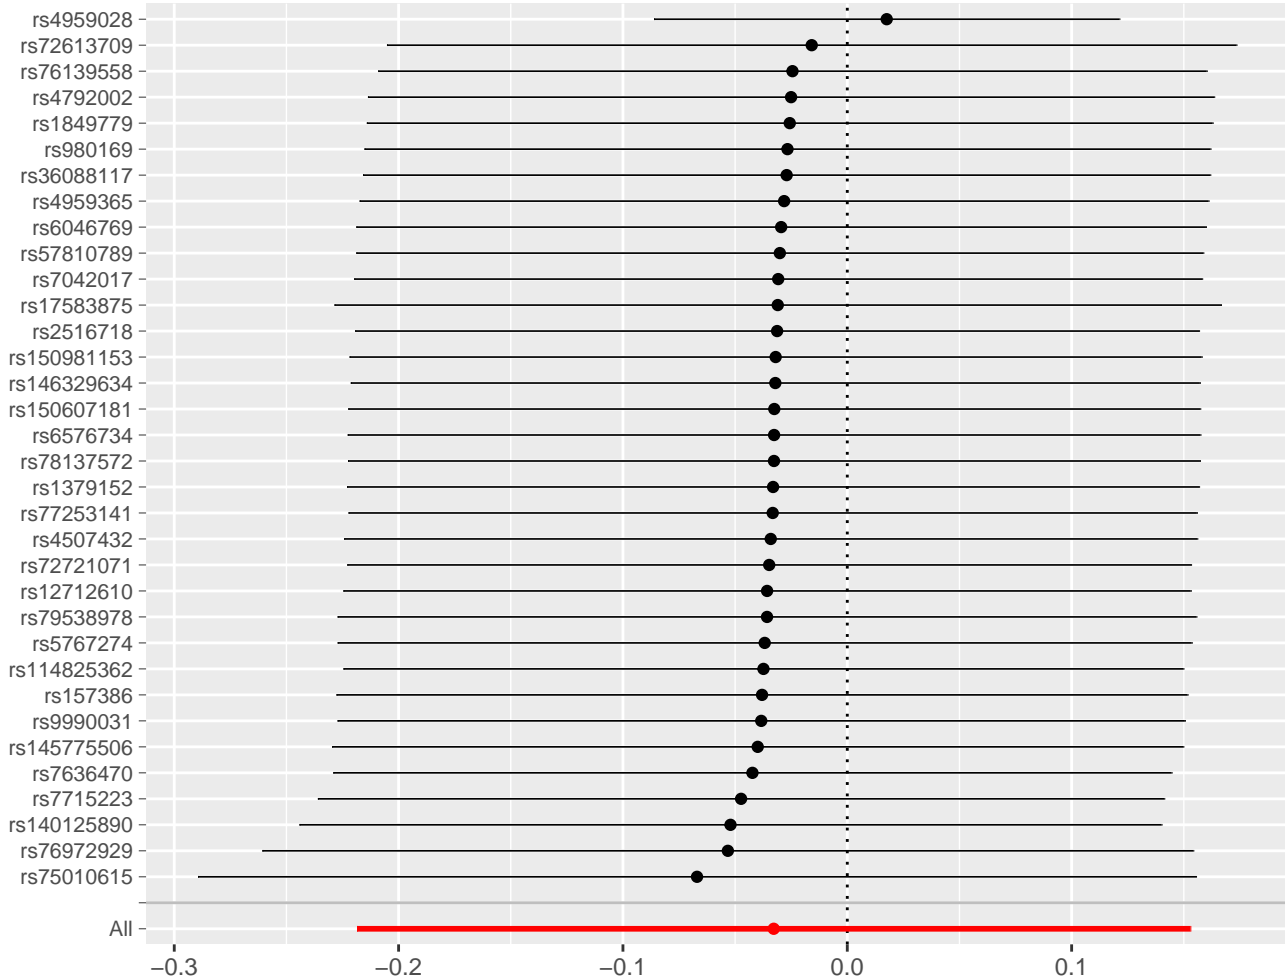

MR leave-one-out sensitivity analysis for 'Naive CD4+ %T cell' on 'Juvenile arthritis'

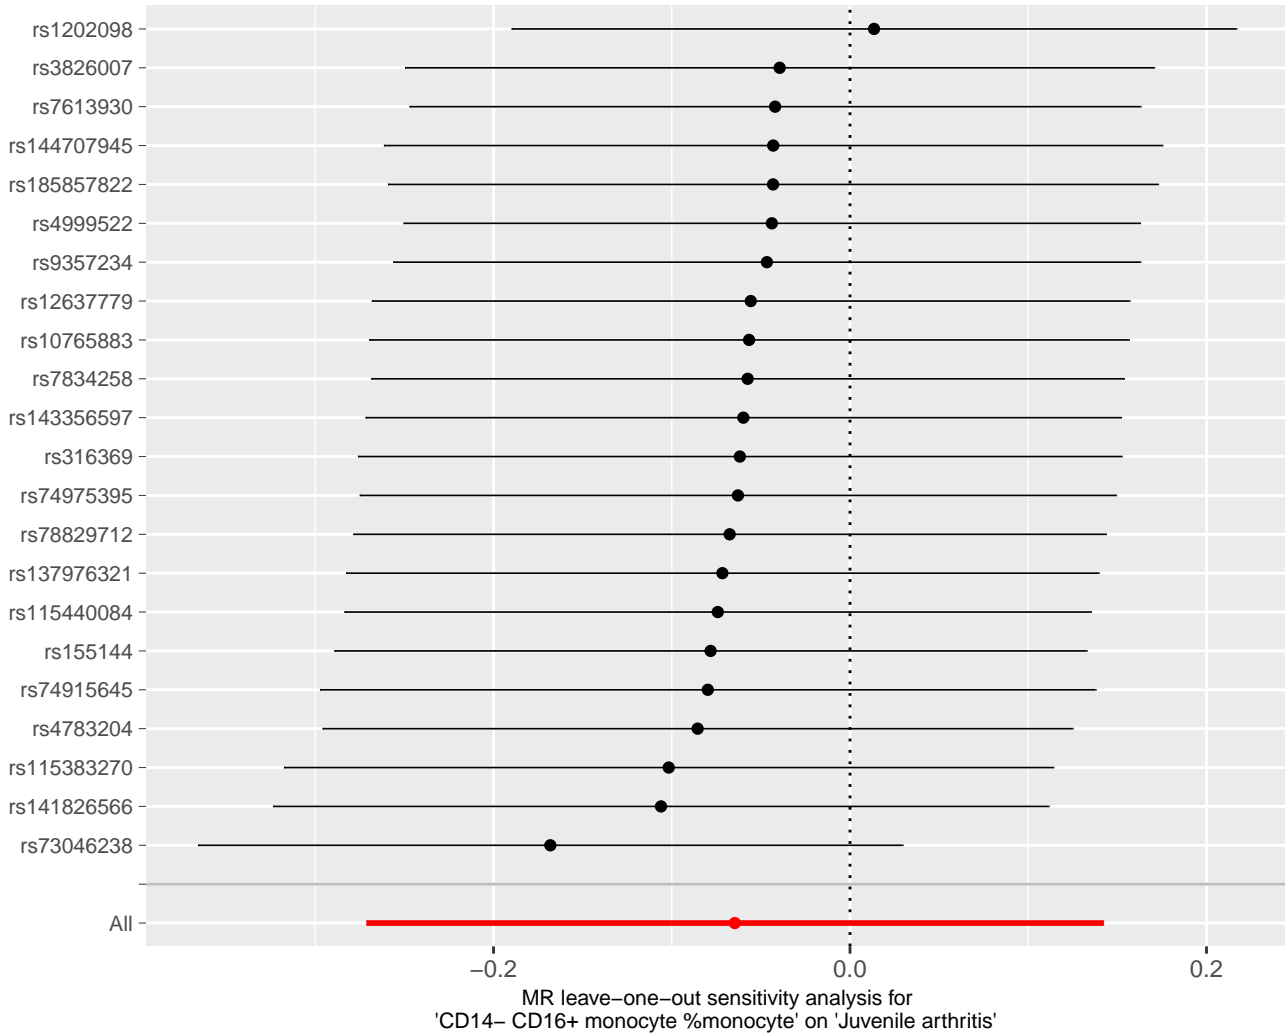

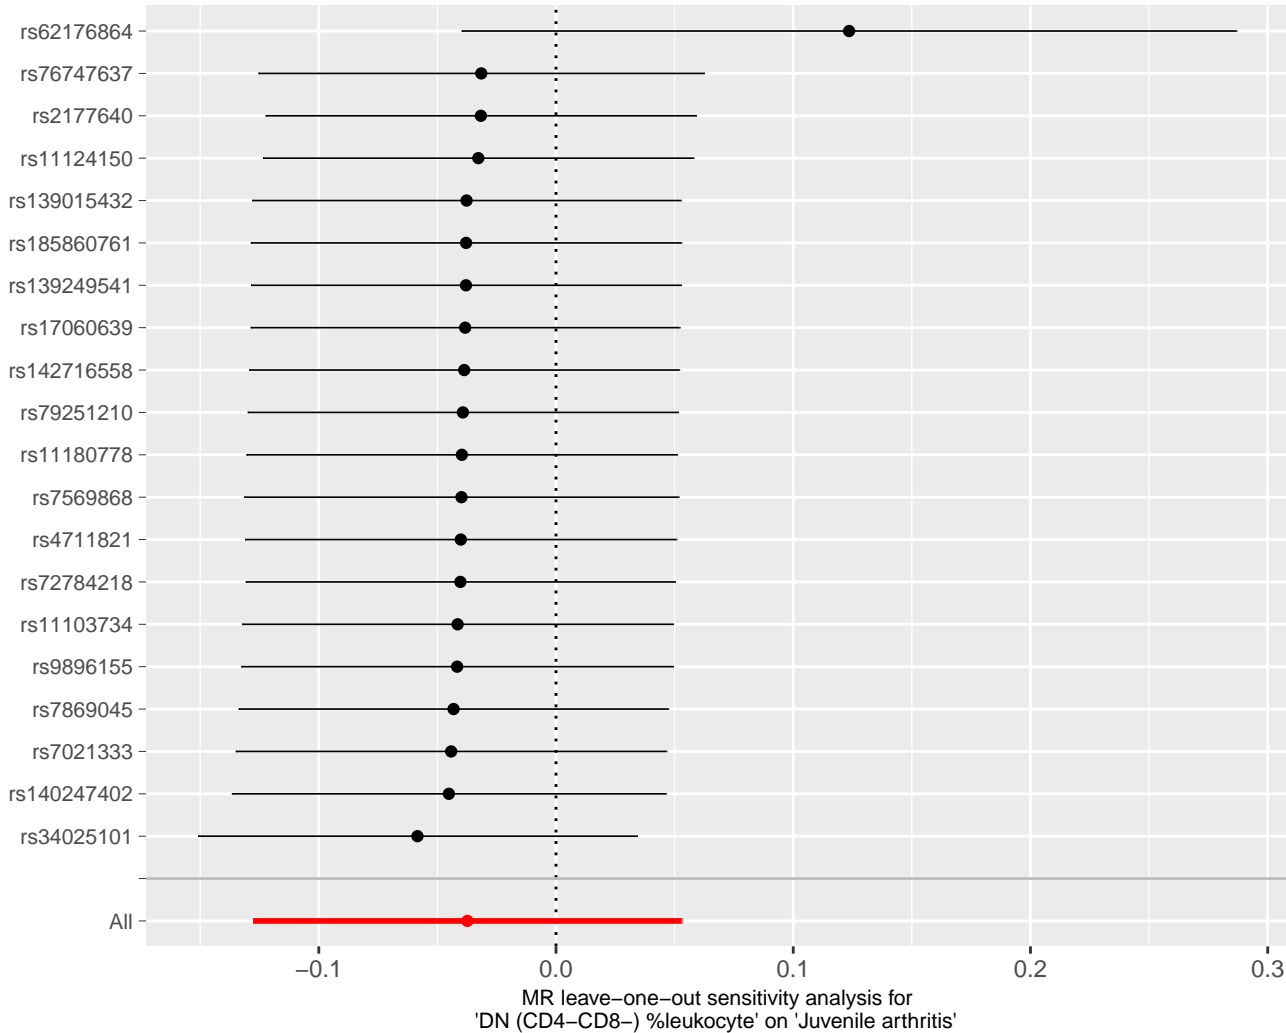

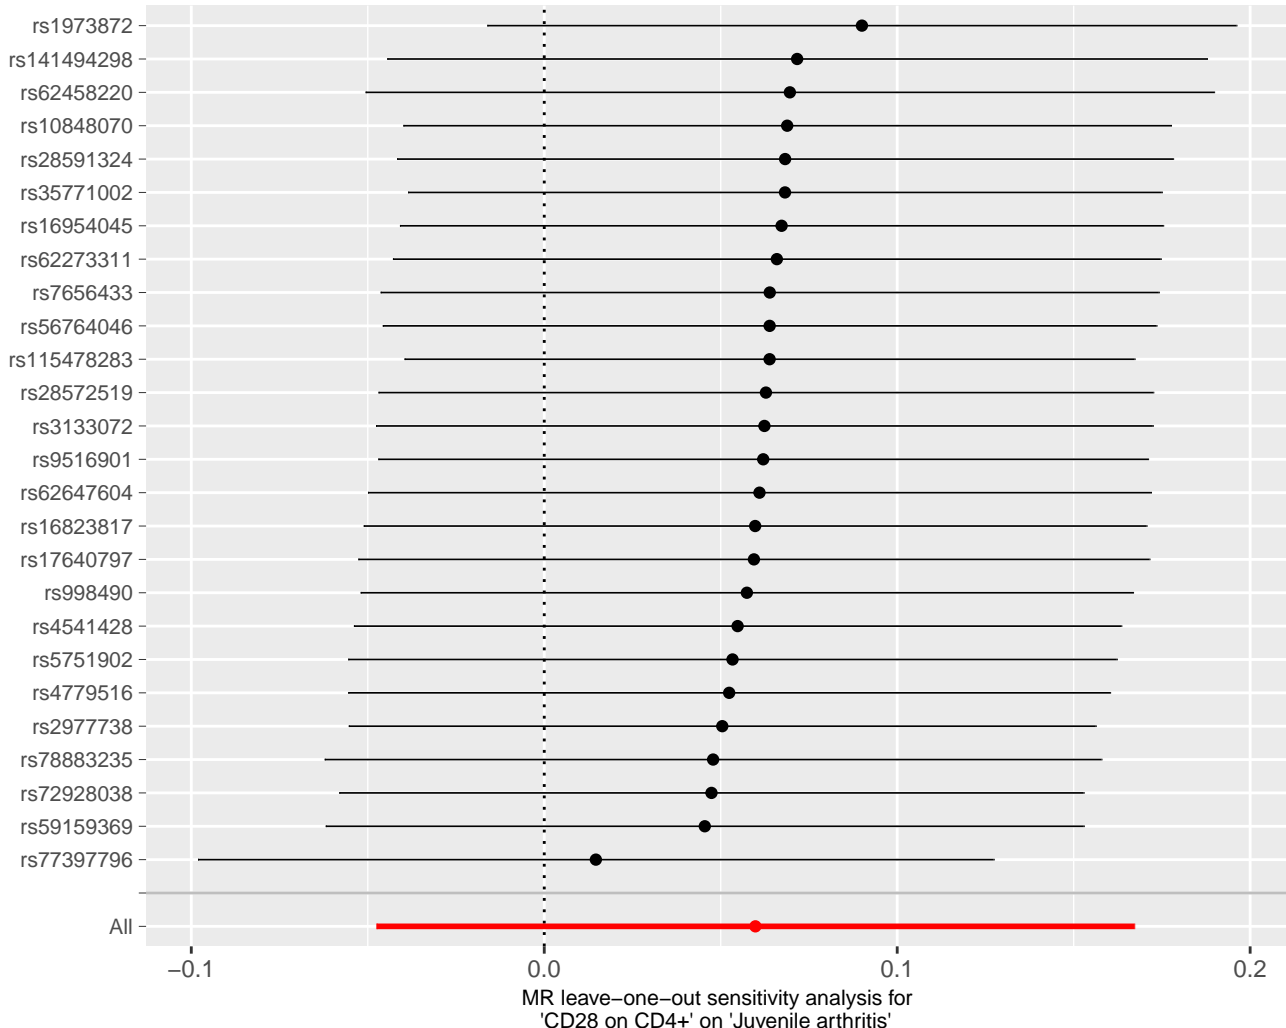

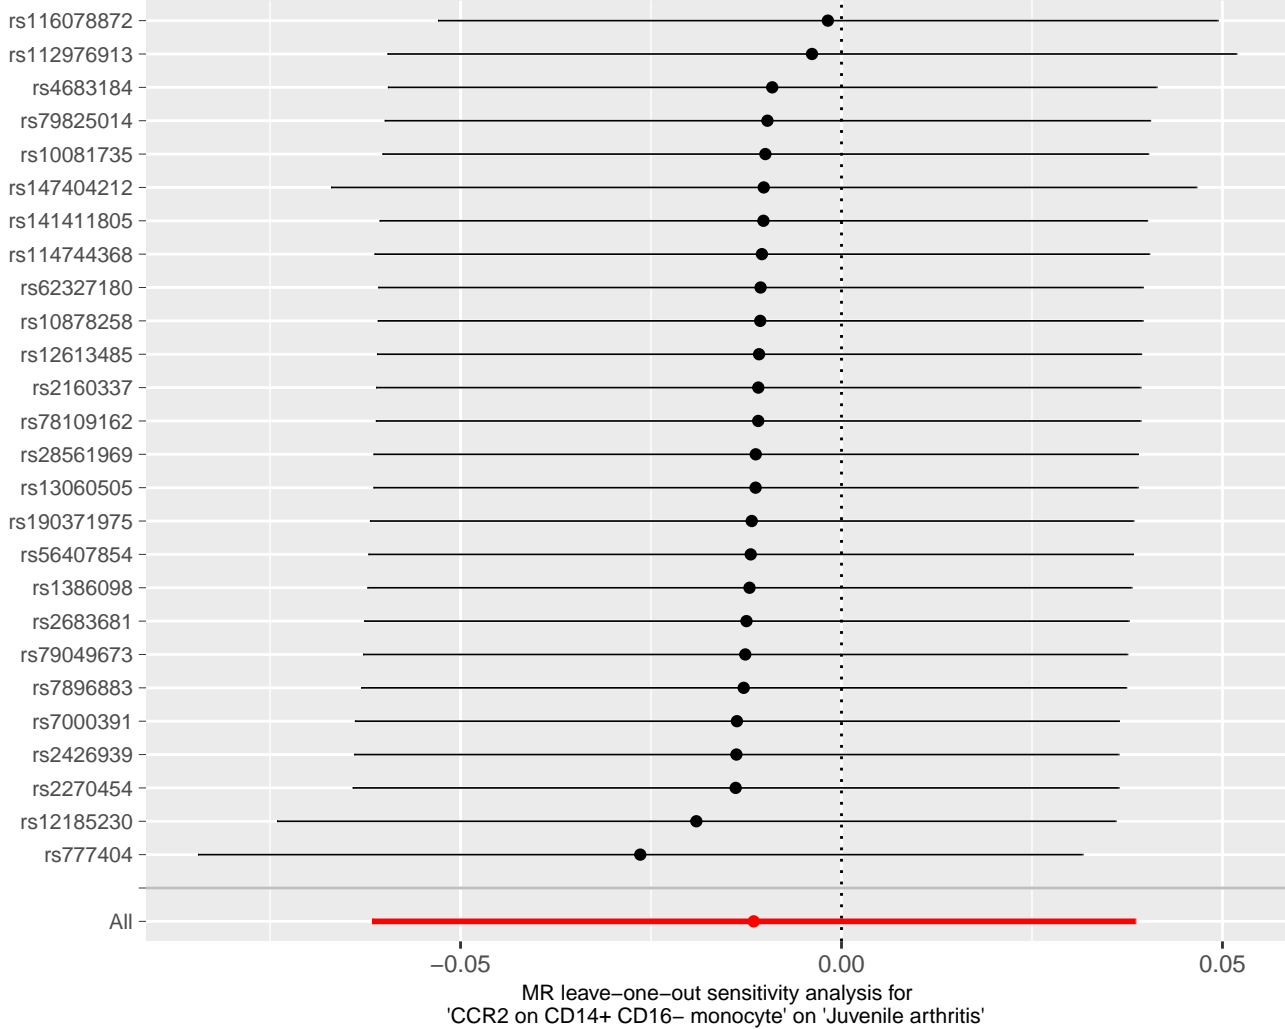

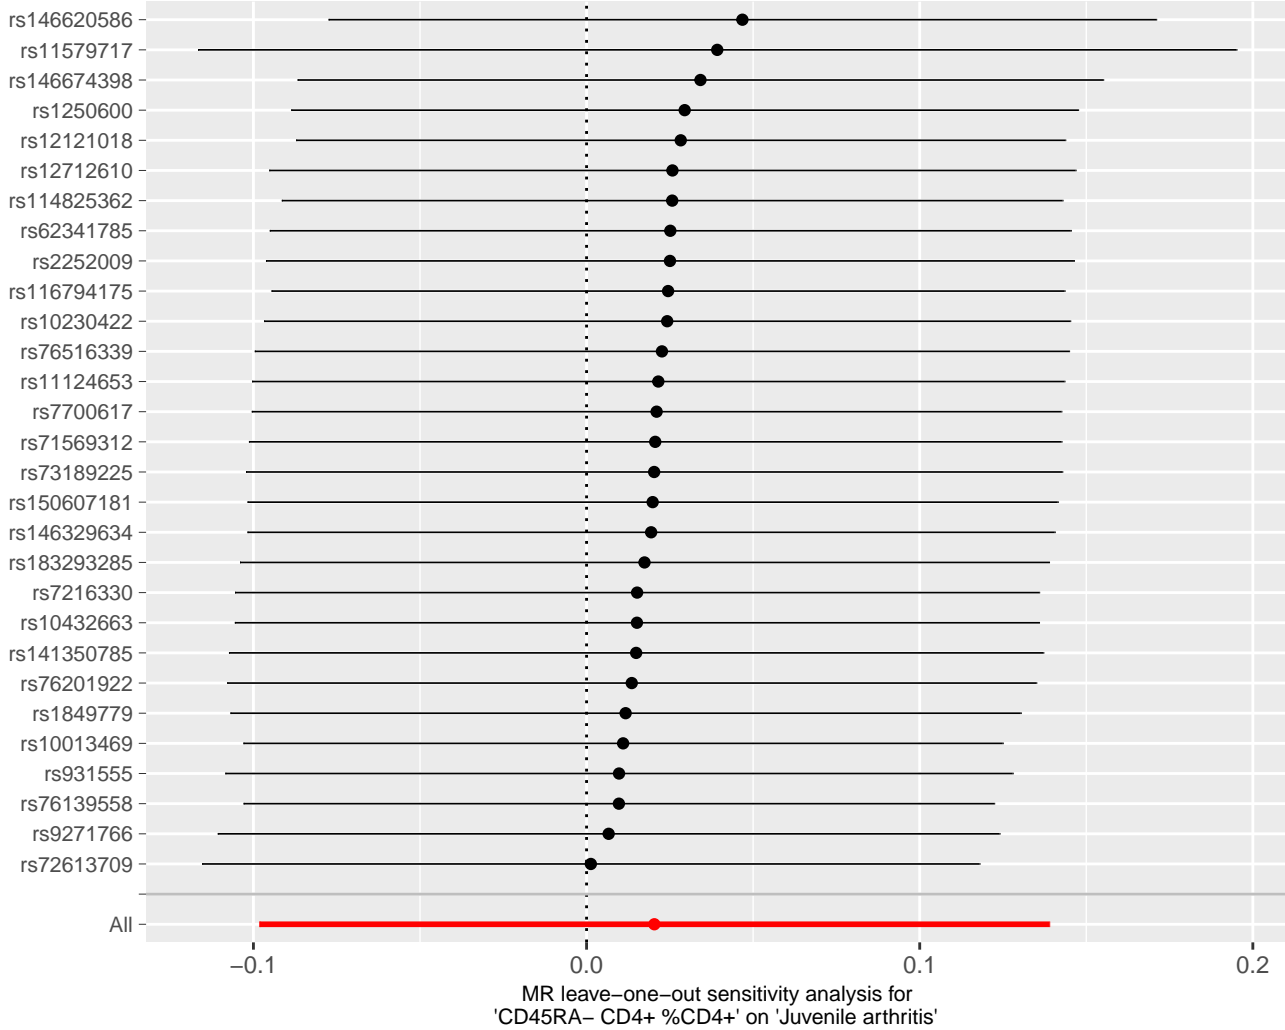



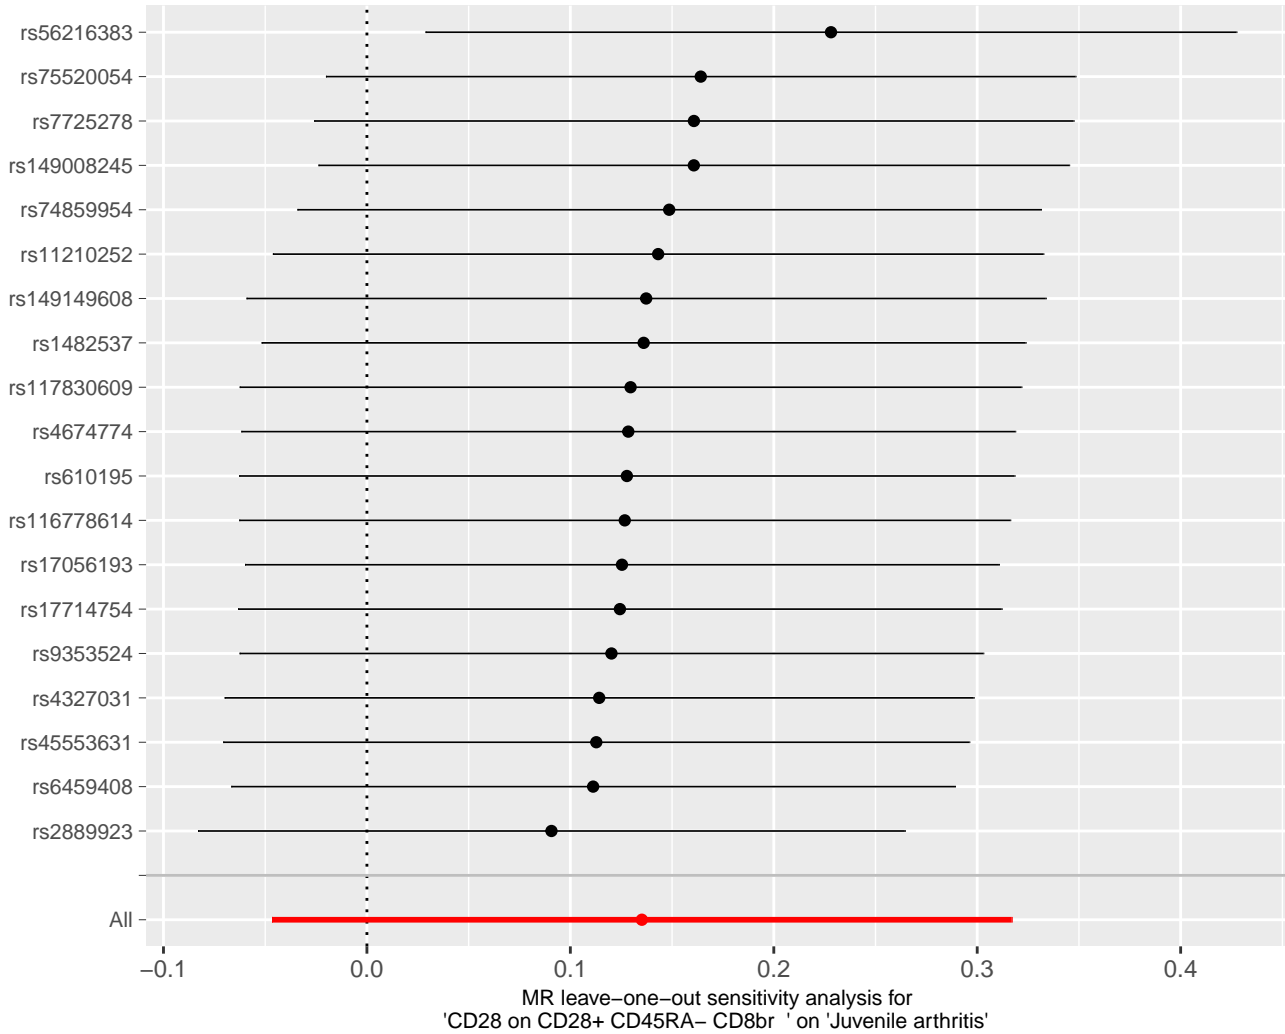

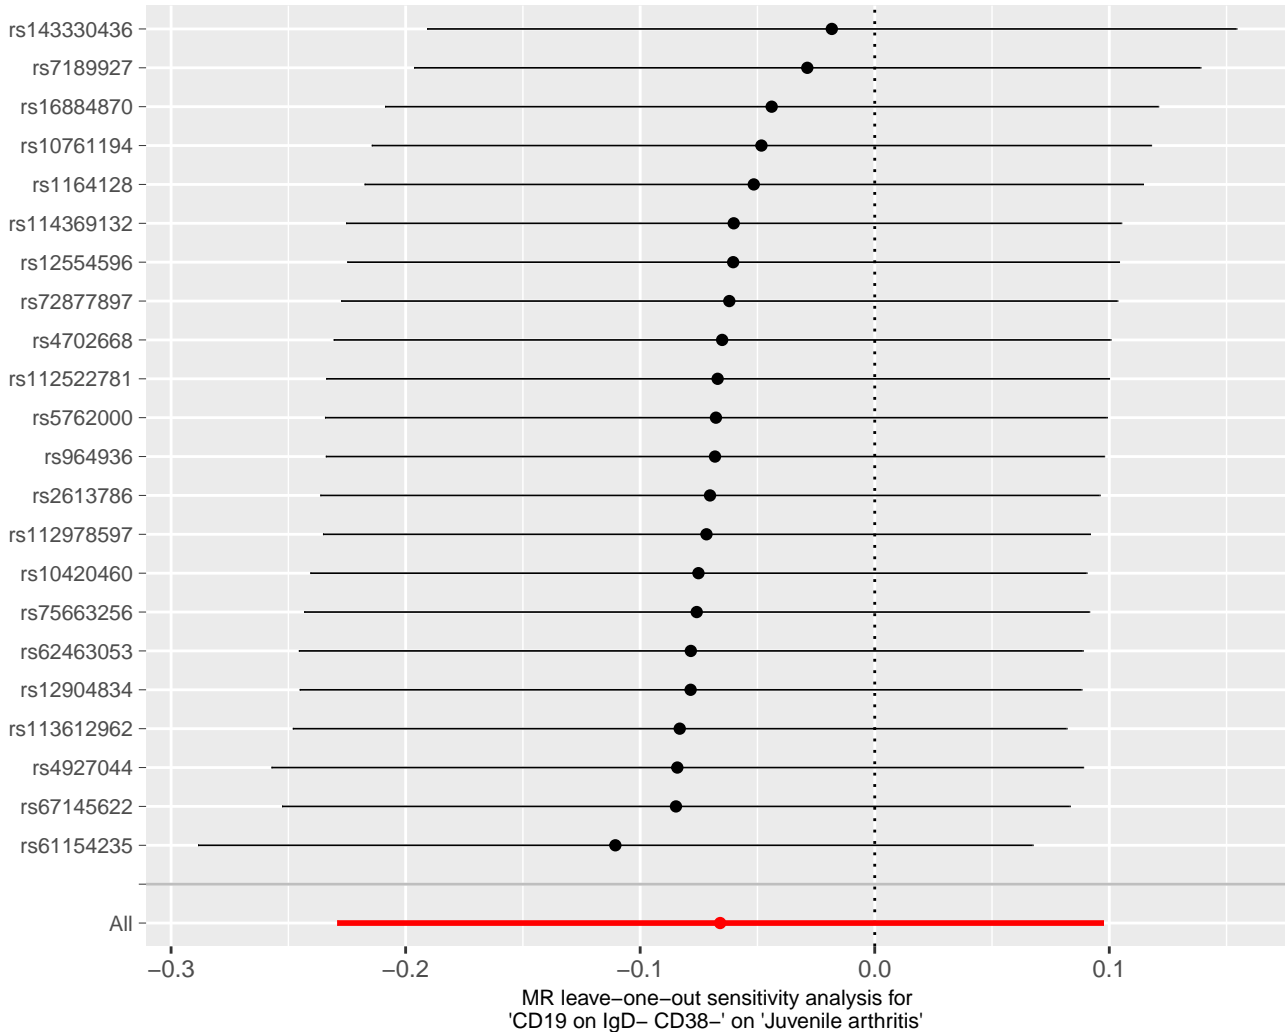

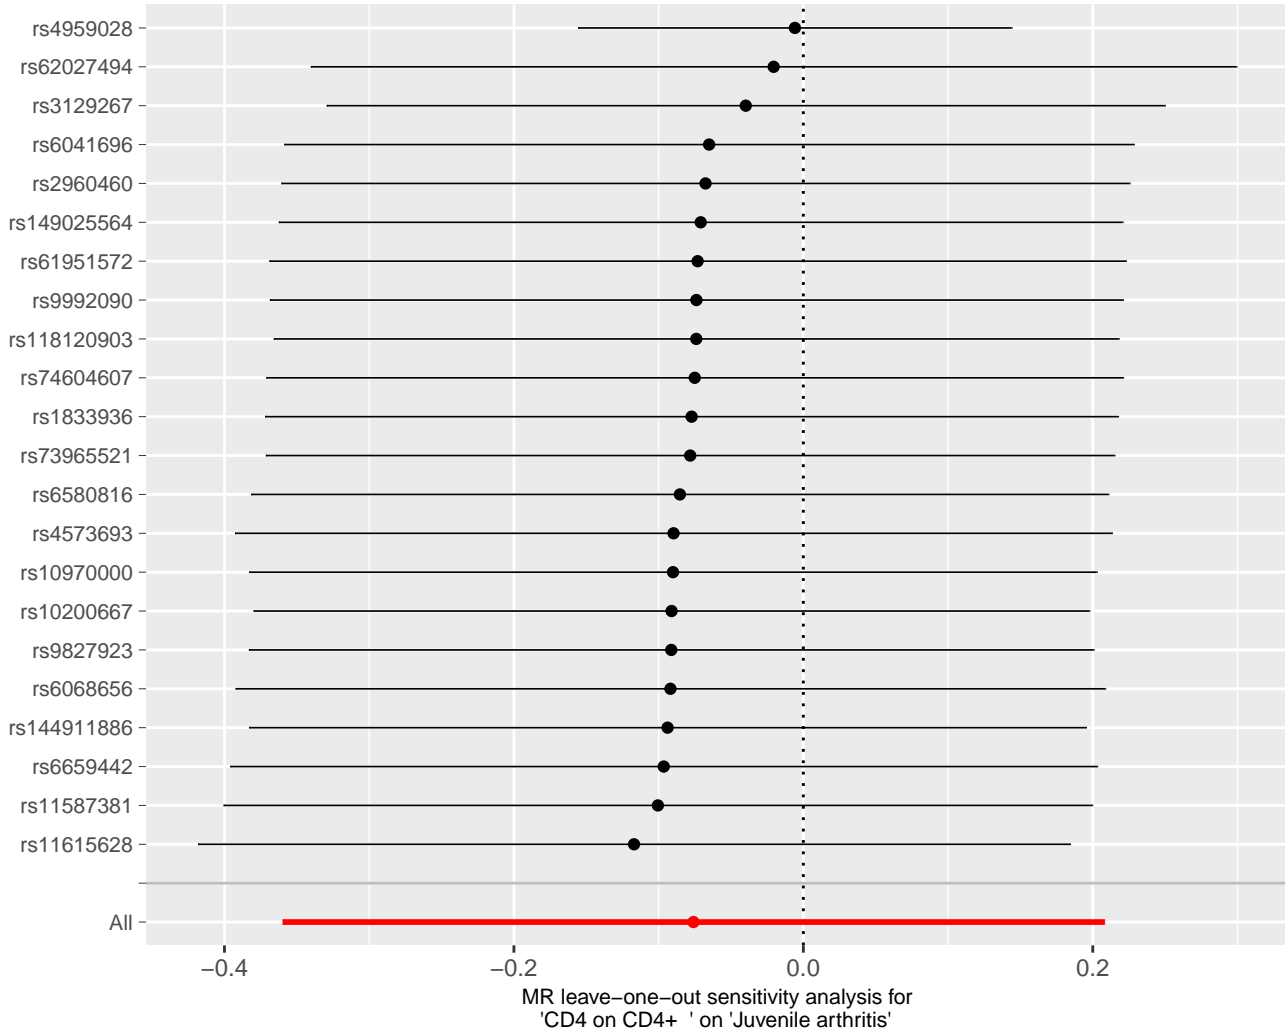

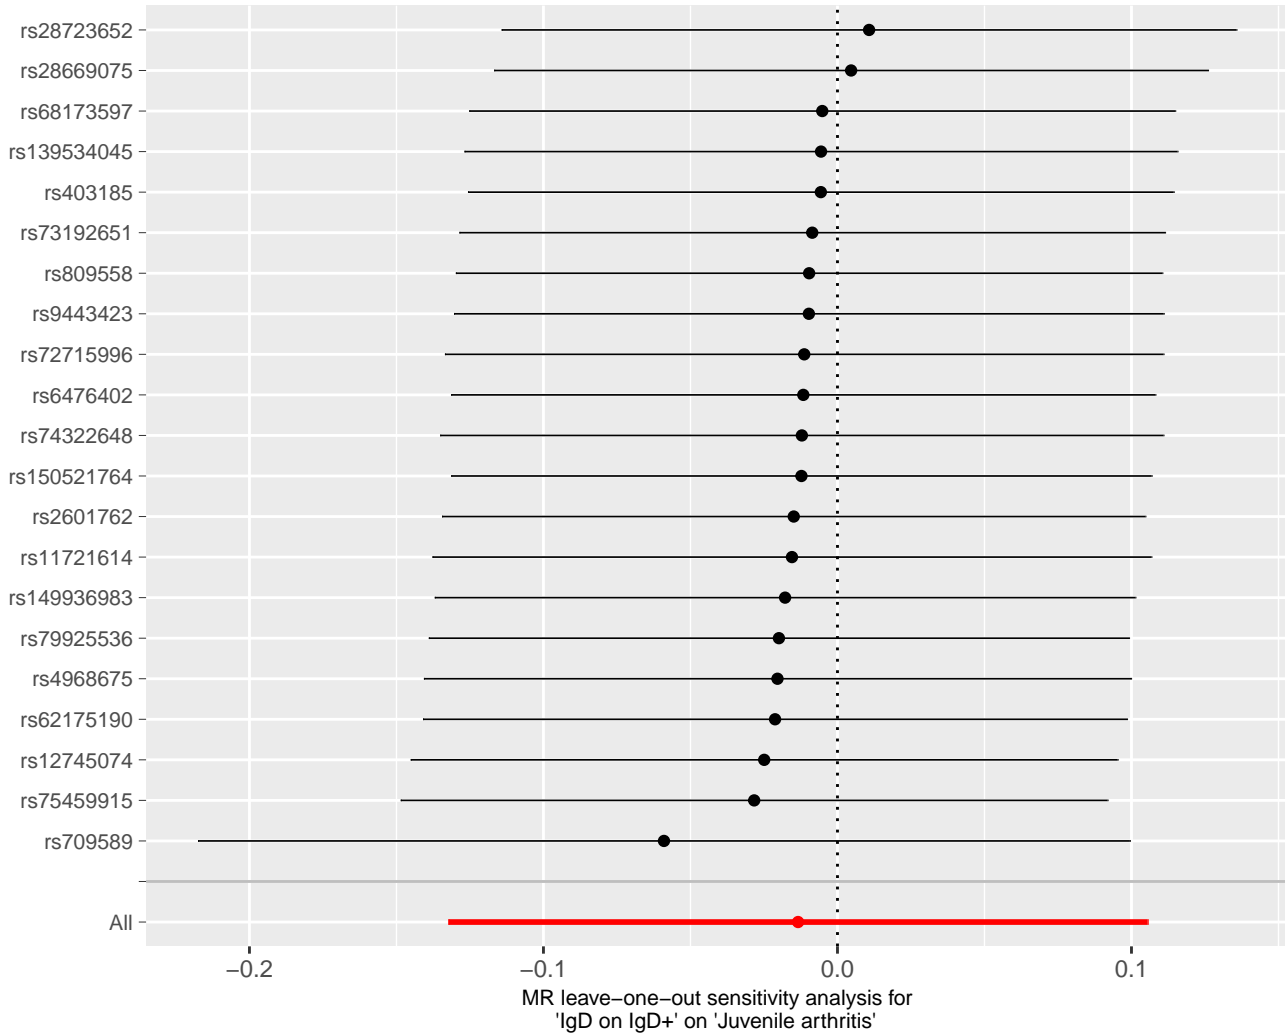

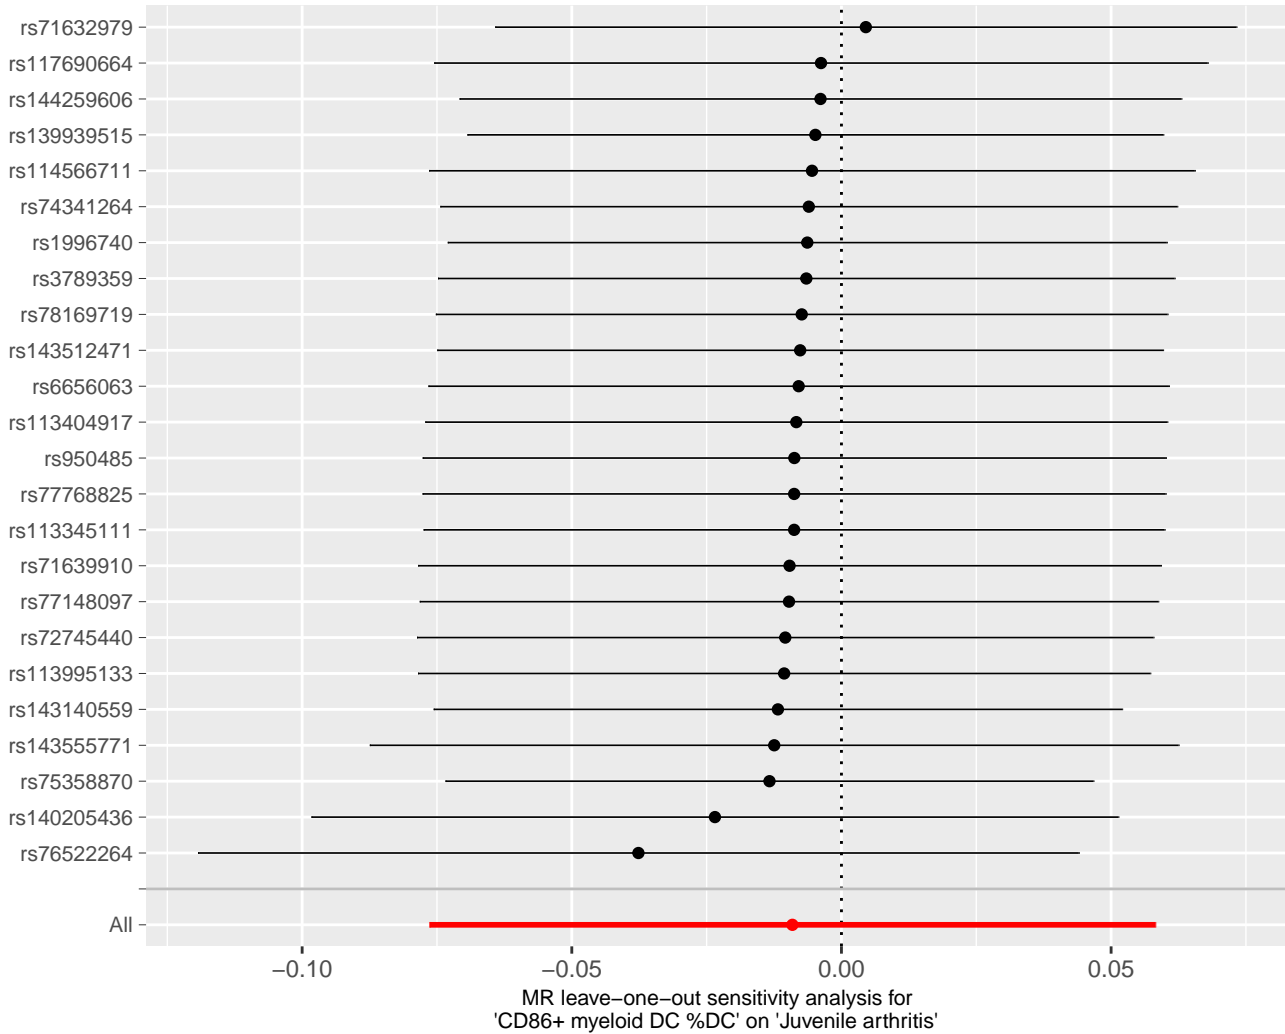

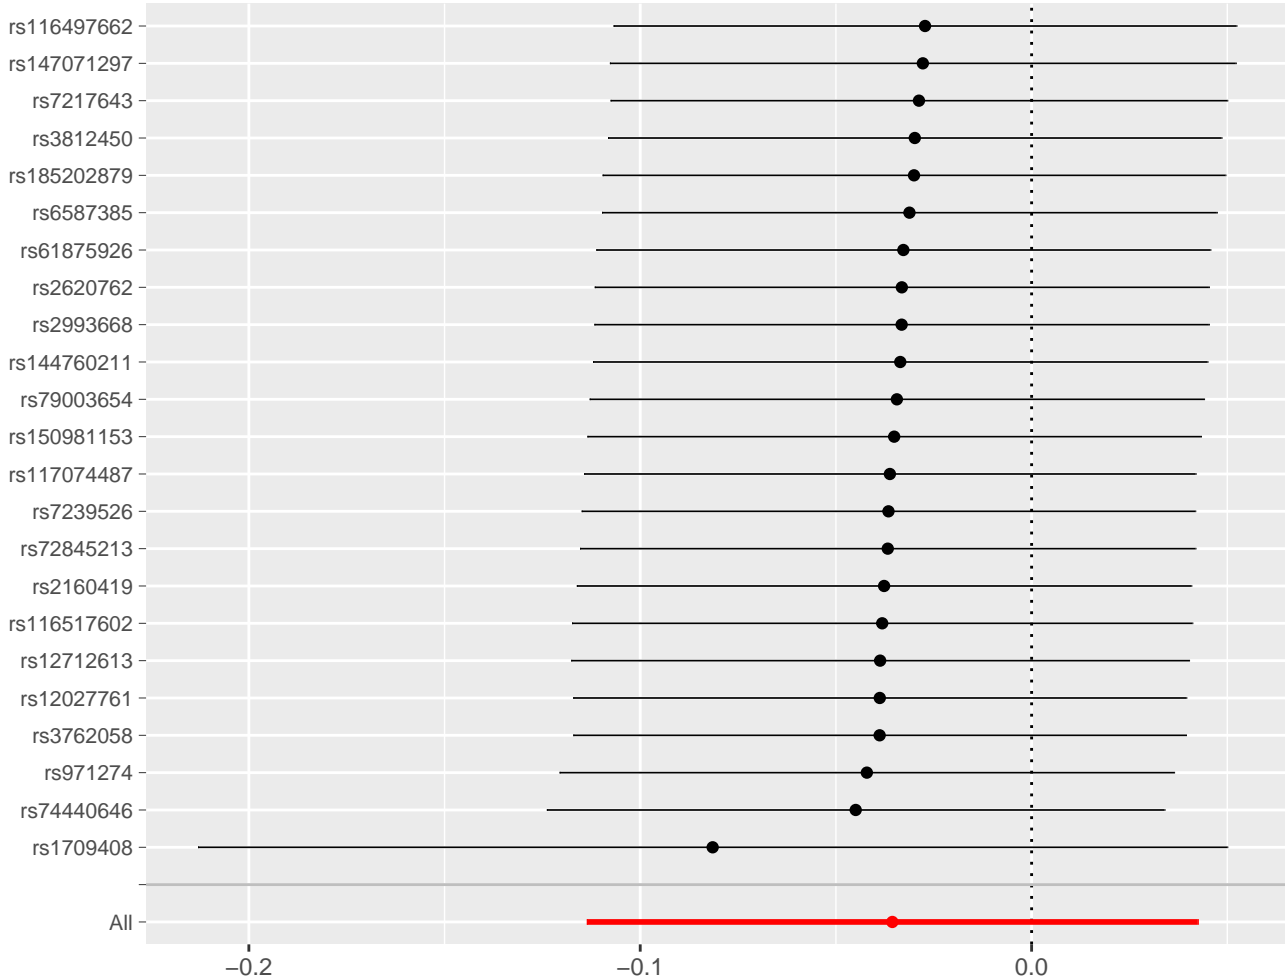

MR leave-one-out sensitivity analysis for 'CD45RA on naive CD8br' on 'Juvenile arthritis'

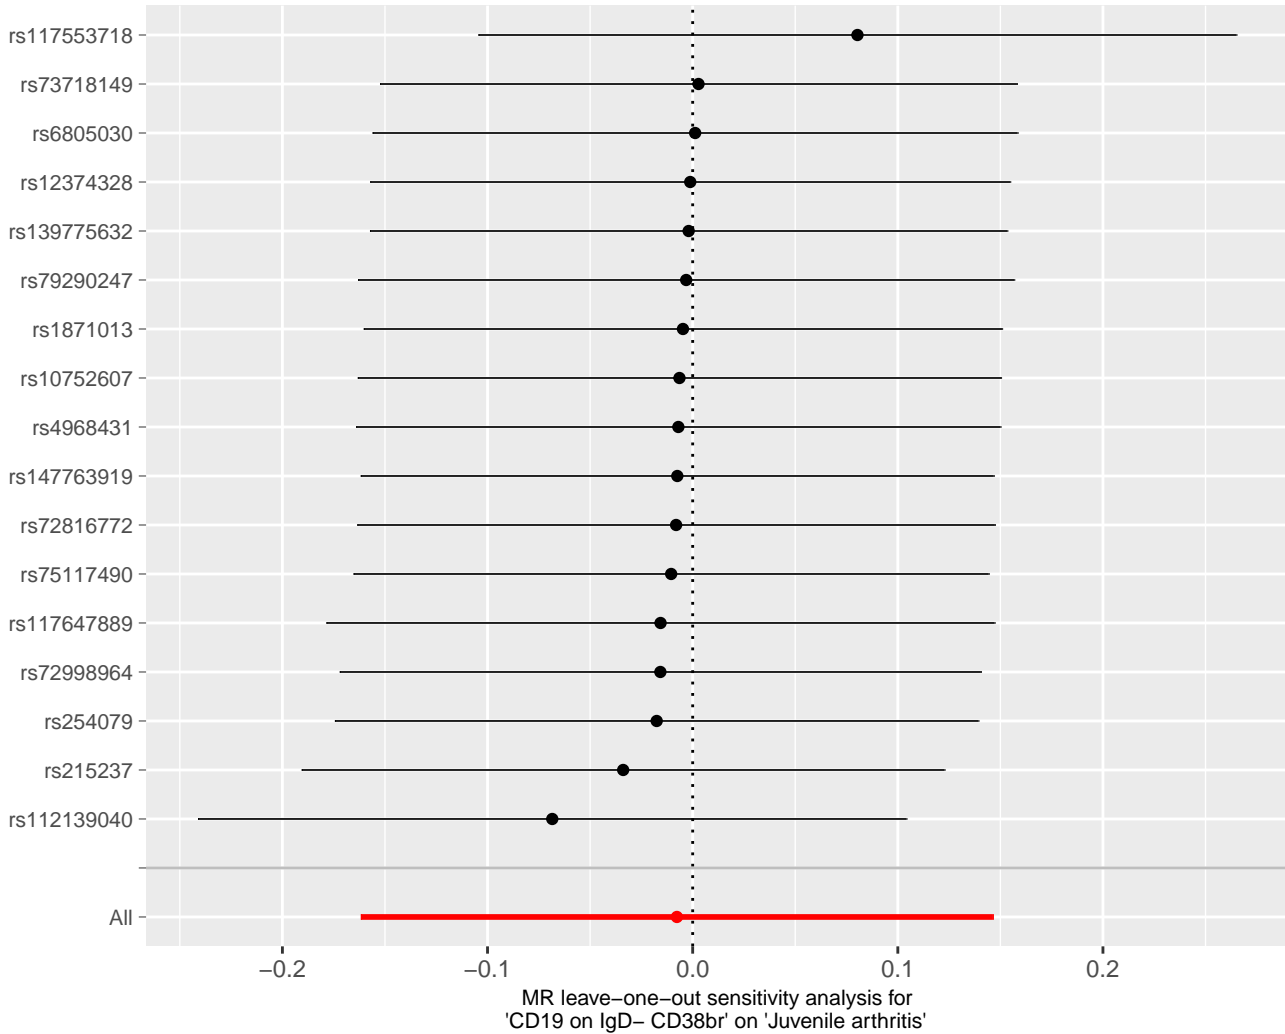

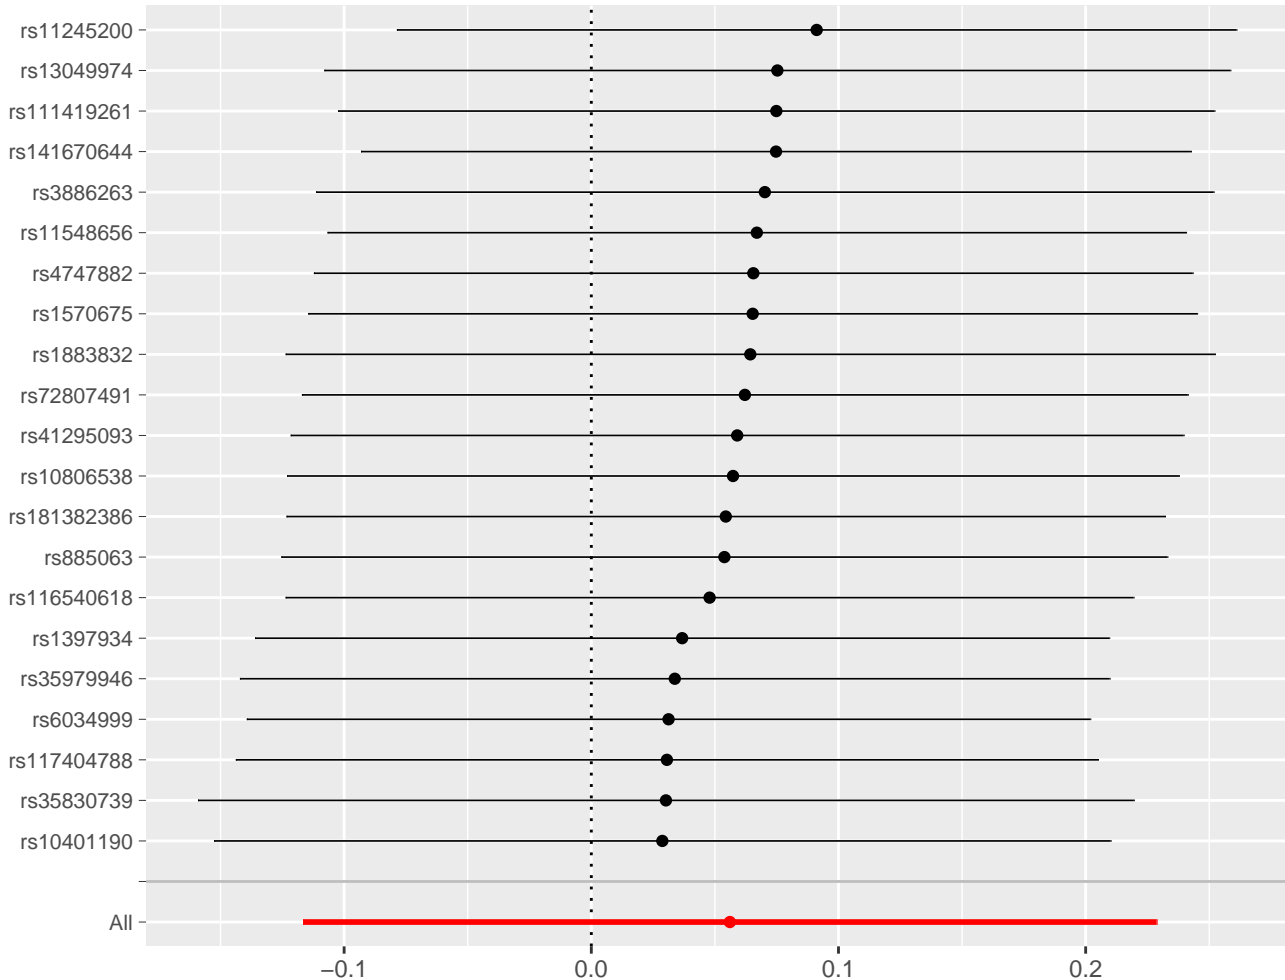



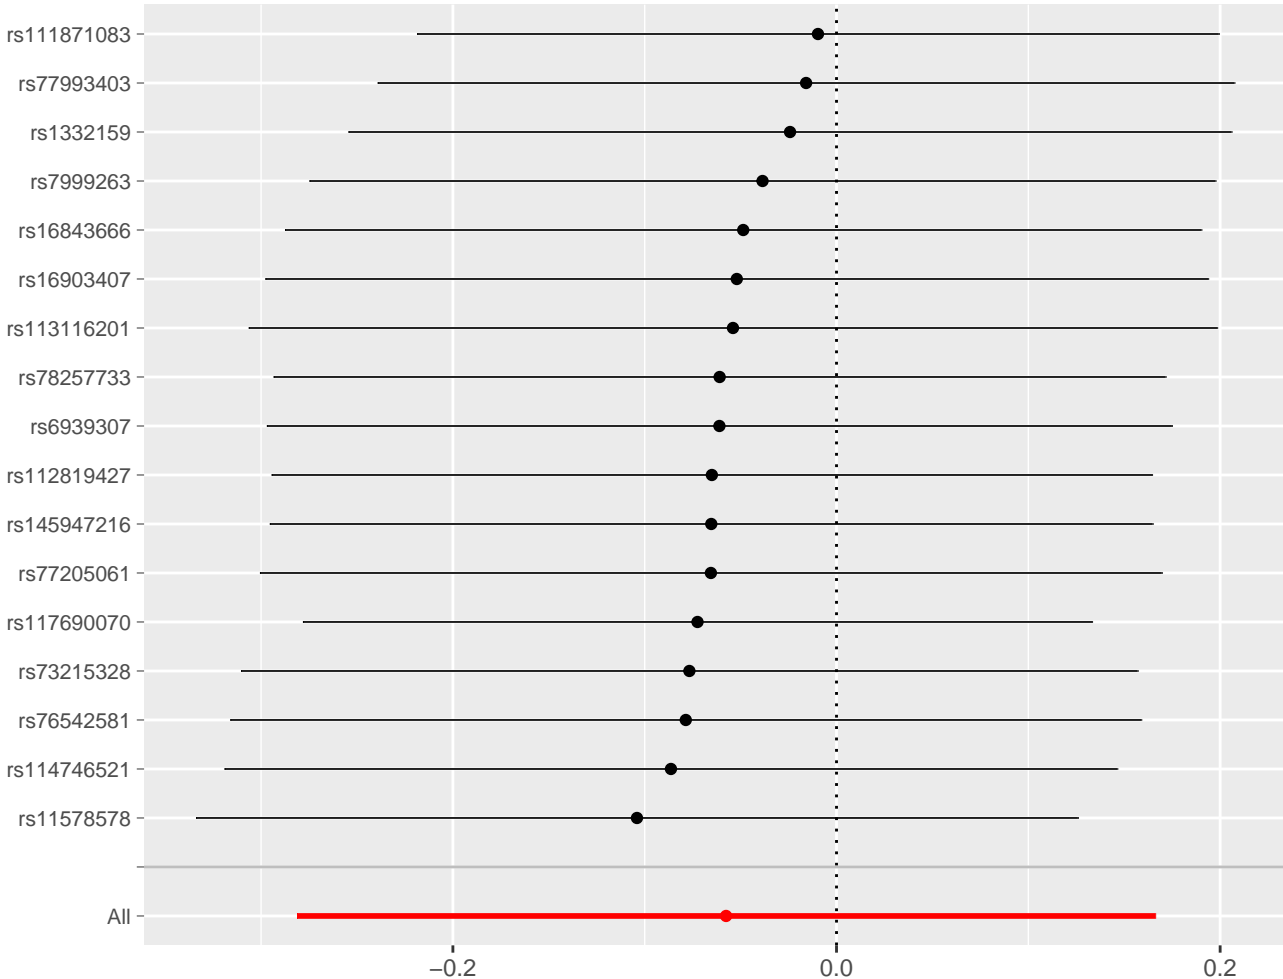

MR leave-one-out sensitivity analysis for 'CD25 on activated Treg' on 'Juvenile arthritis'

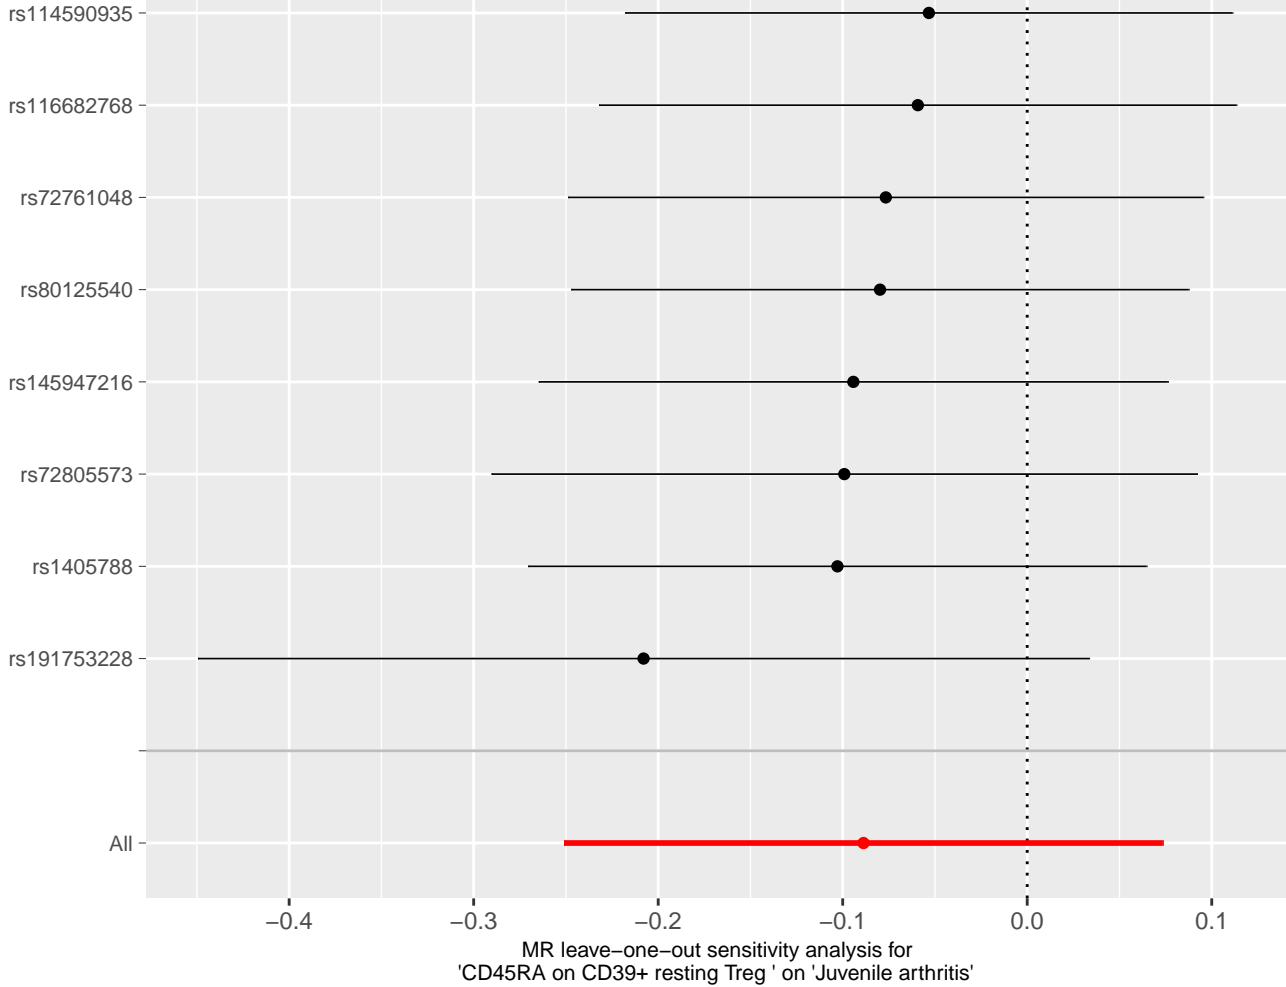

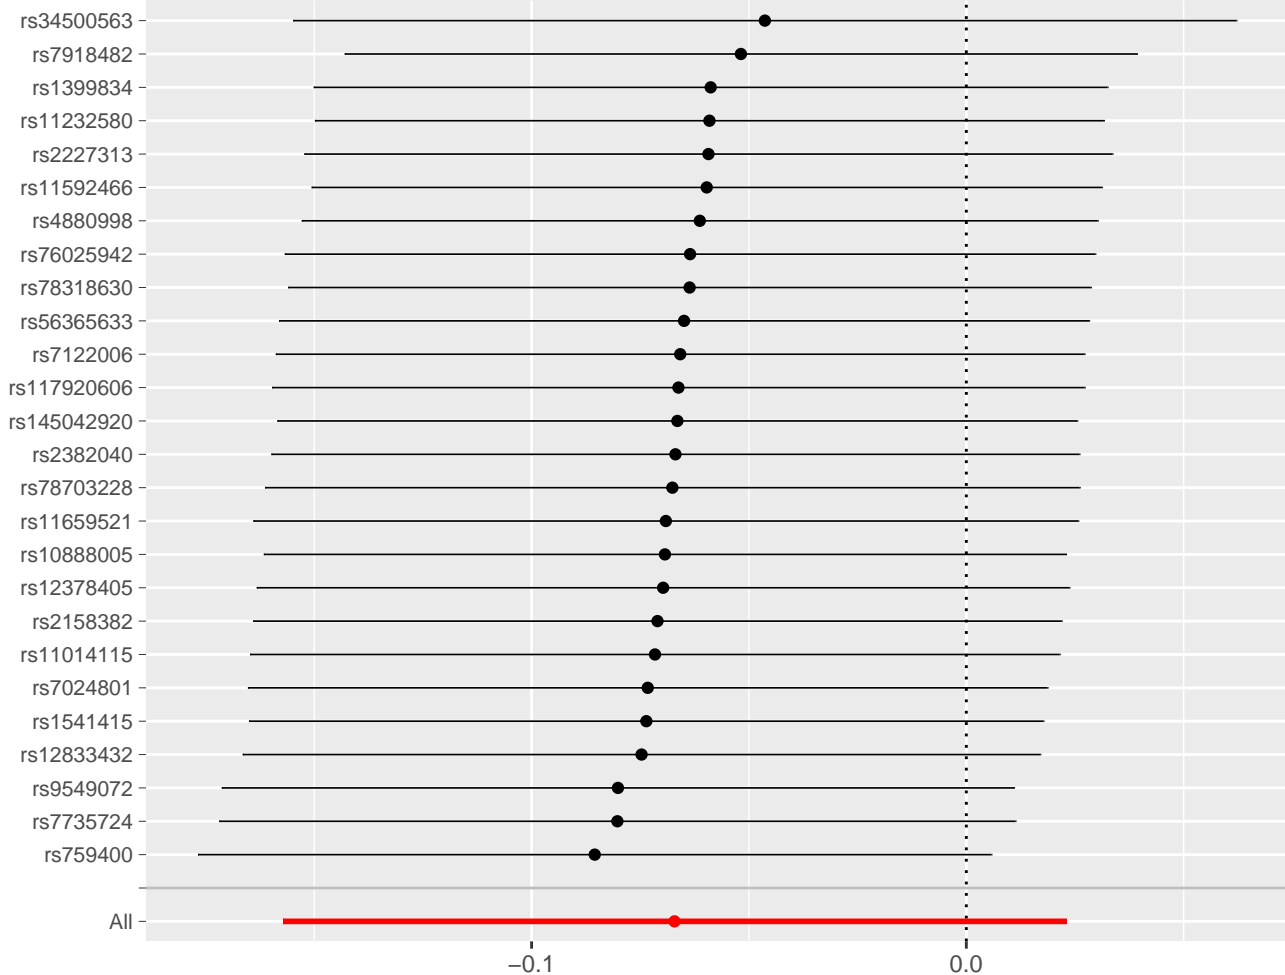

MR leave-one-out sensitivity analysis for 'HVEM on TD CD4+' on 'Juvenile arthritis'

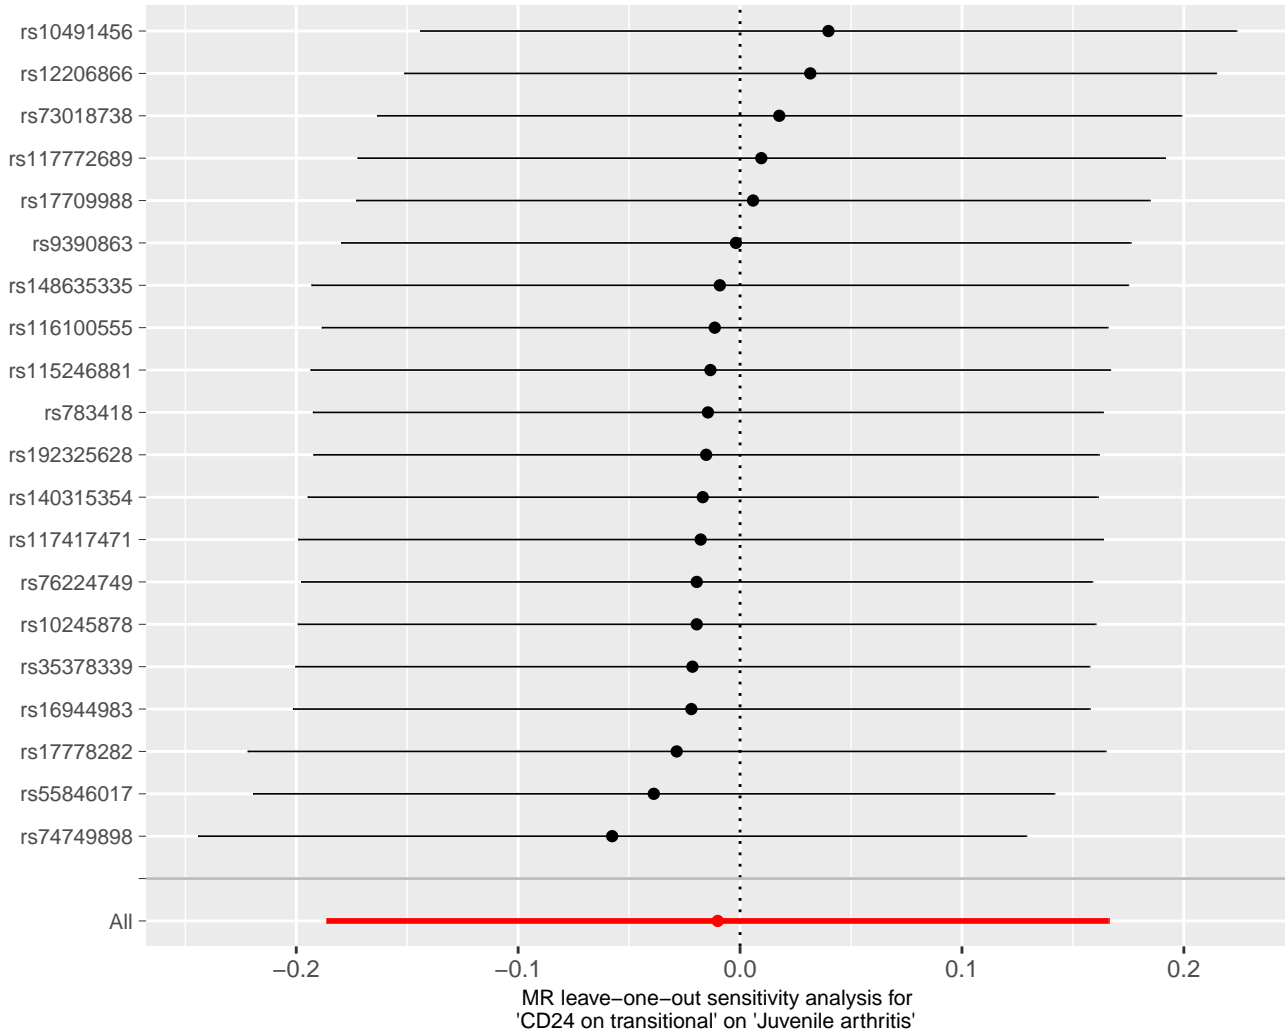

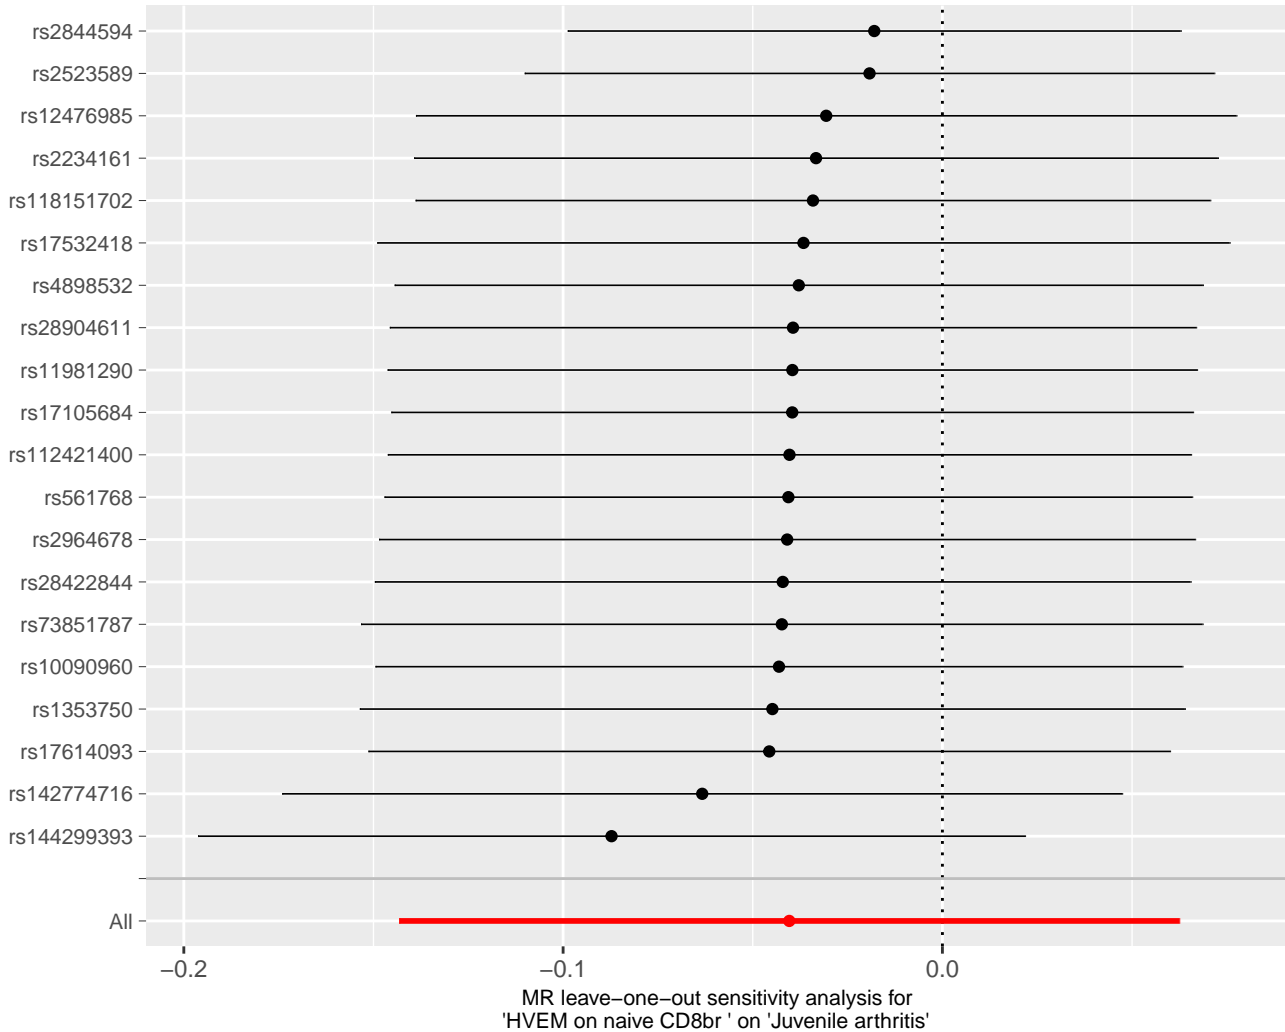

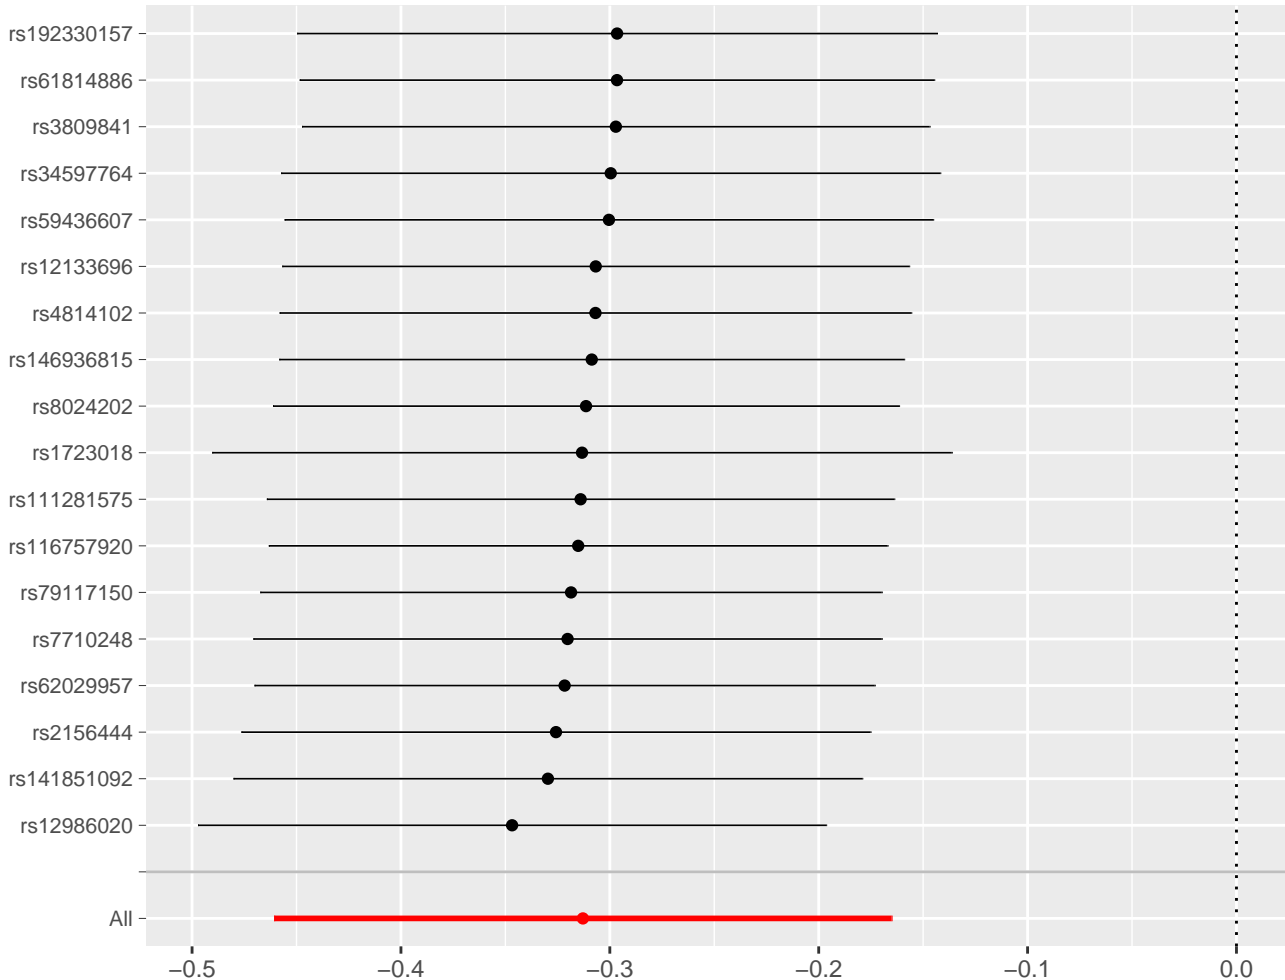

MR leave-one-out sensitivity analysis for 'CD3 on CM CD8br ' on 'Juvenile arthritis'

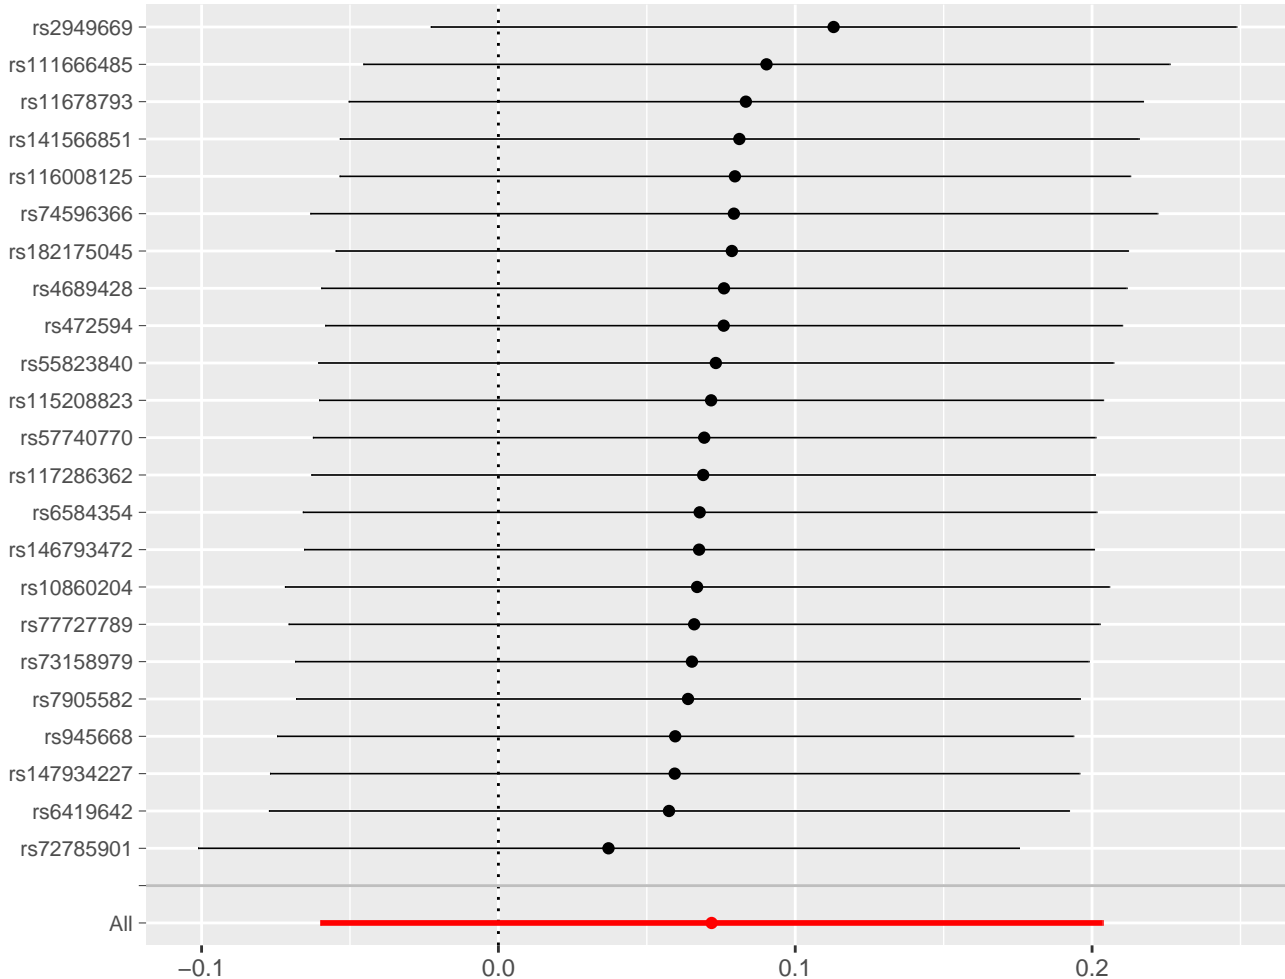

MR leave-one-out sensitivity analysis for  
'CD3 on TD CD8br' on 'Juvenile arthritis'

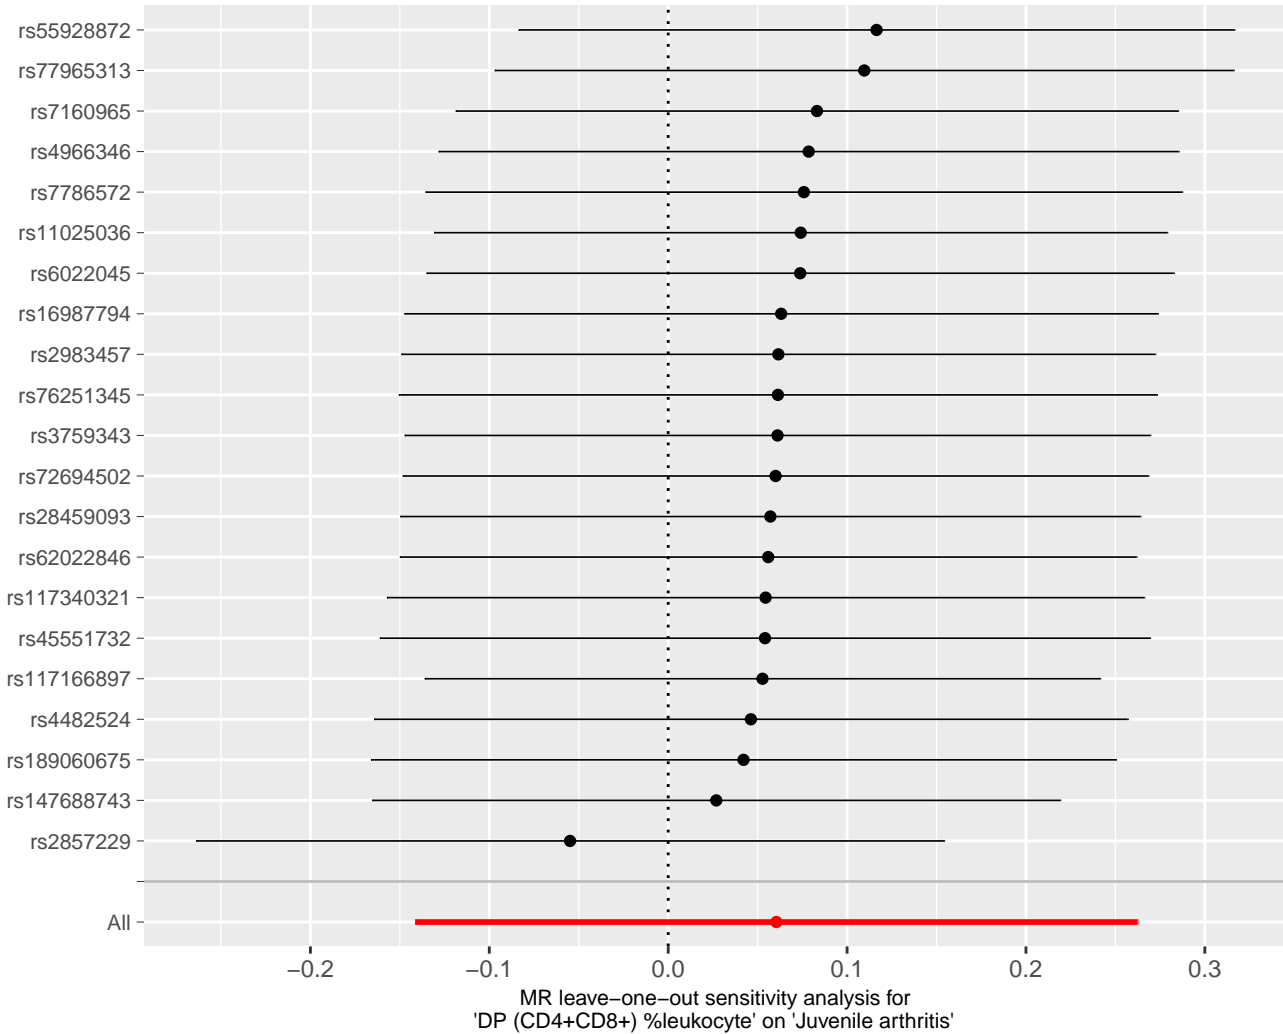



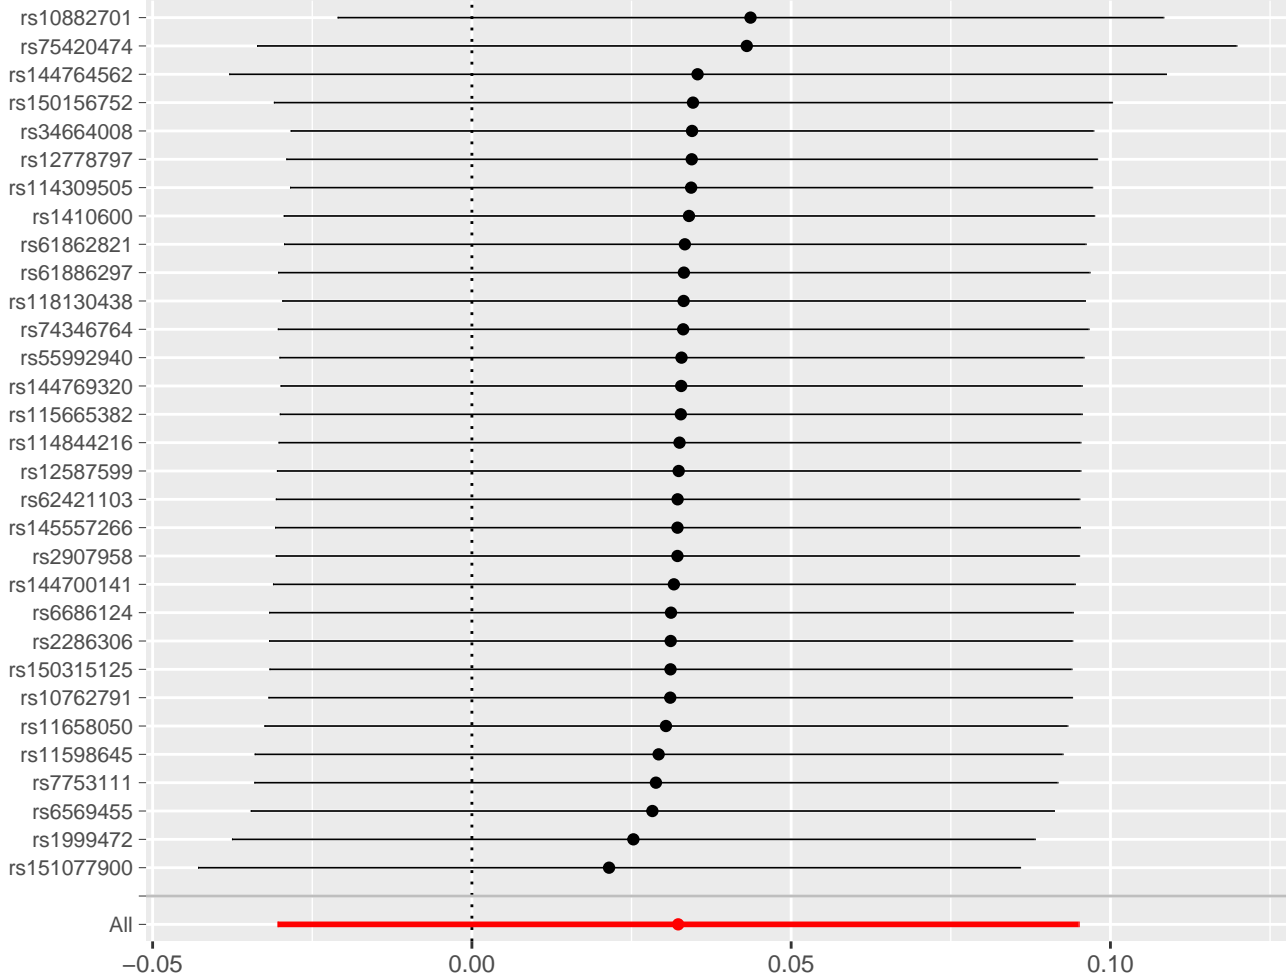

MR leave-one-out sensitivity analysis for 'CD39+ CD4+ %T cell' on 'Juvenile arthritis'

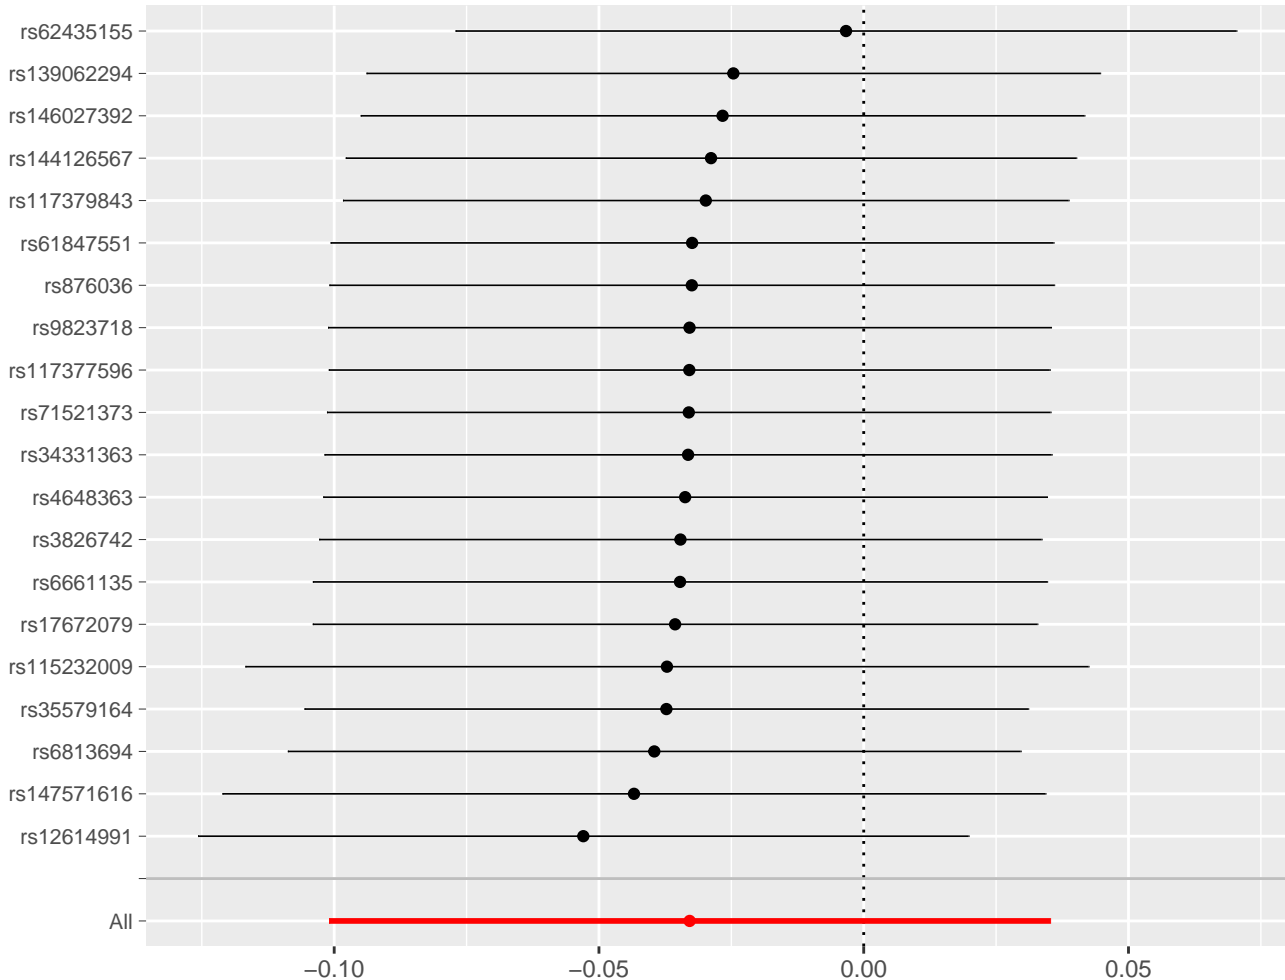

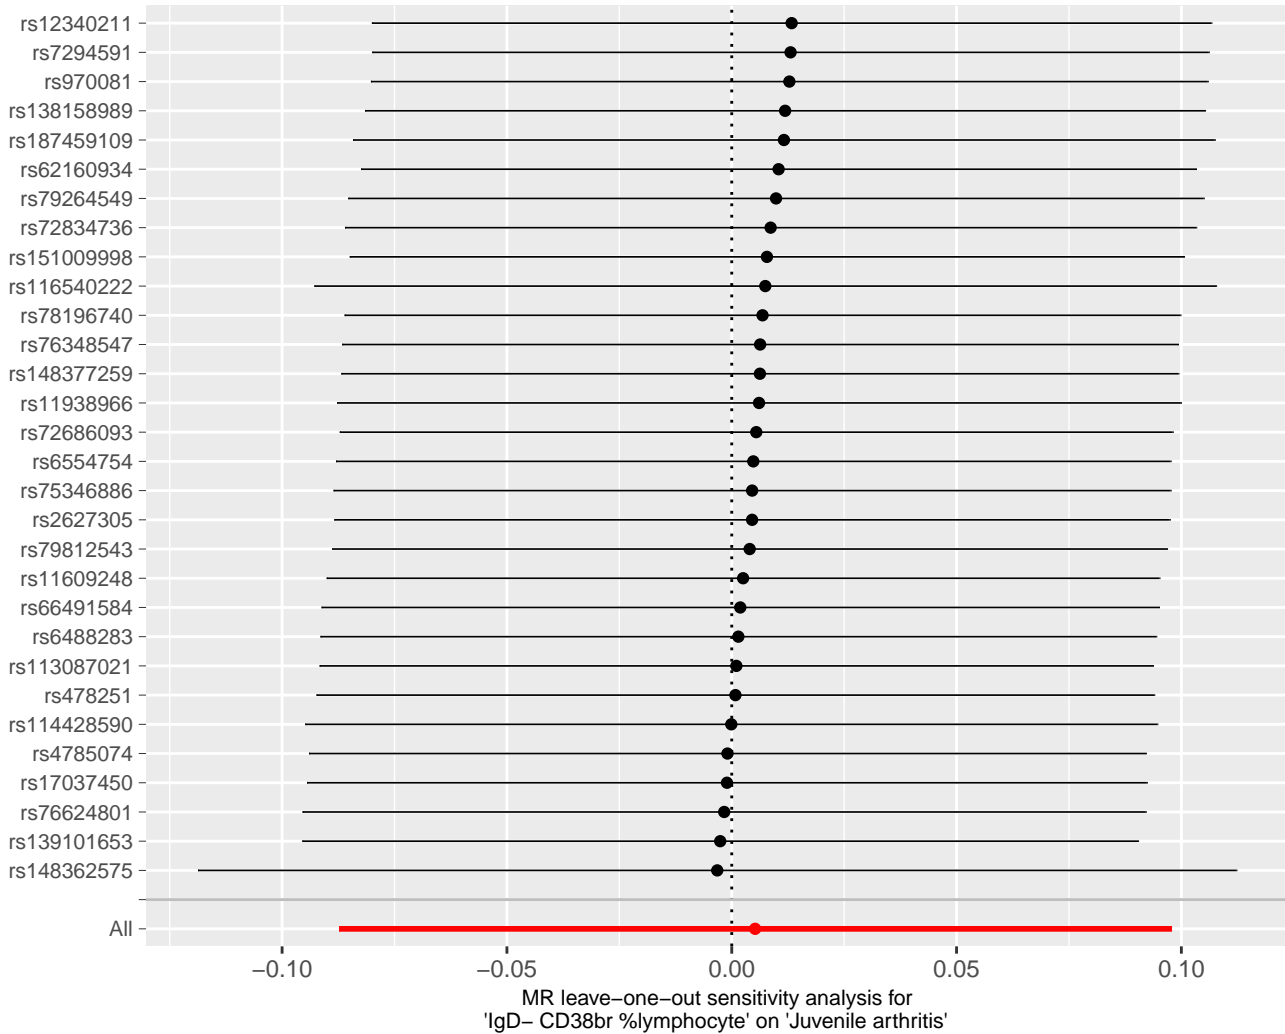

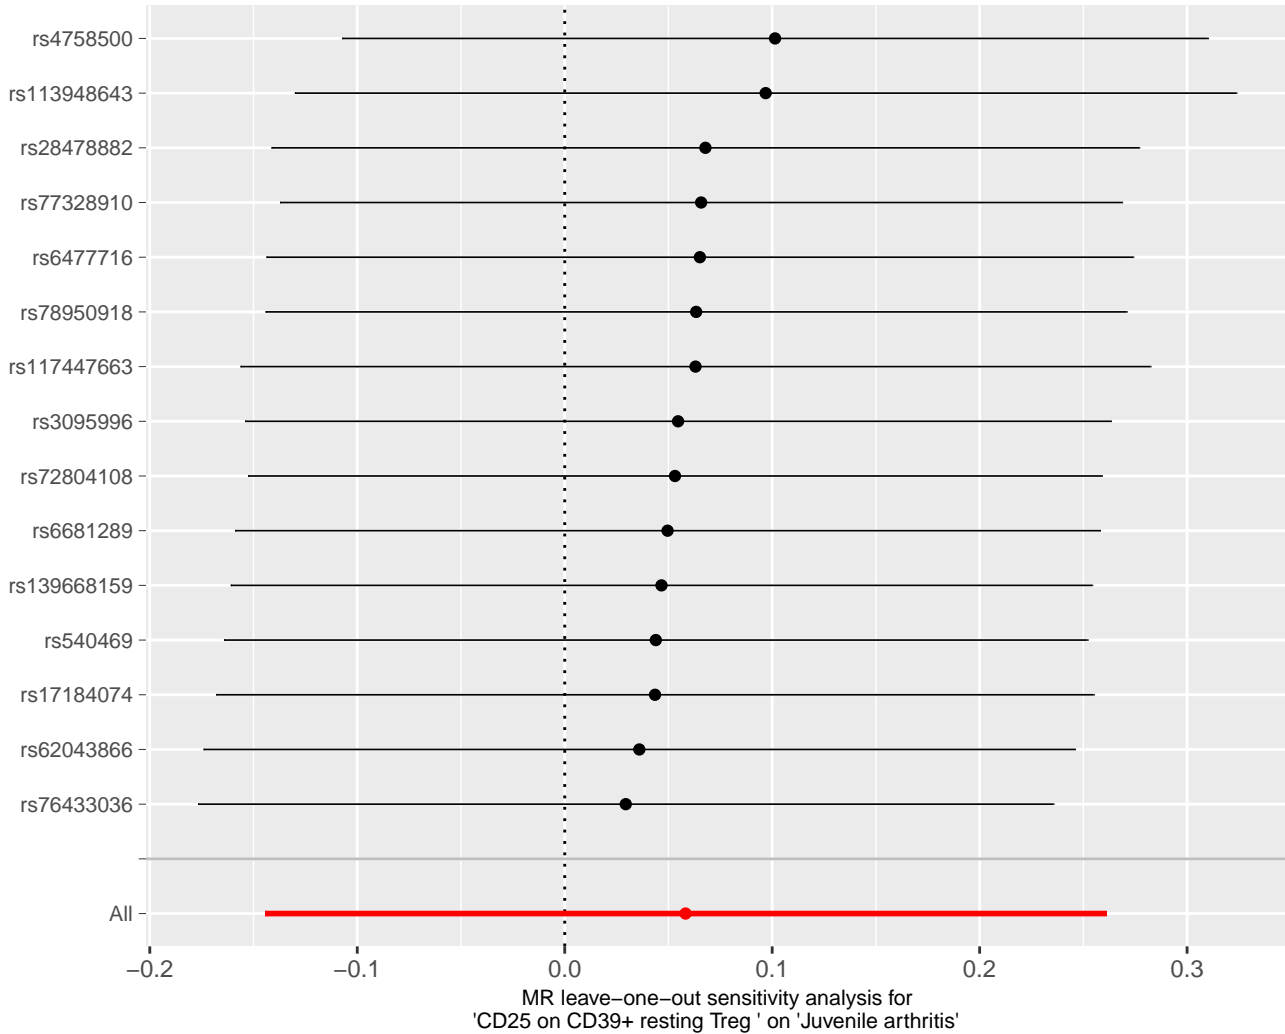

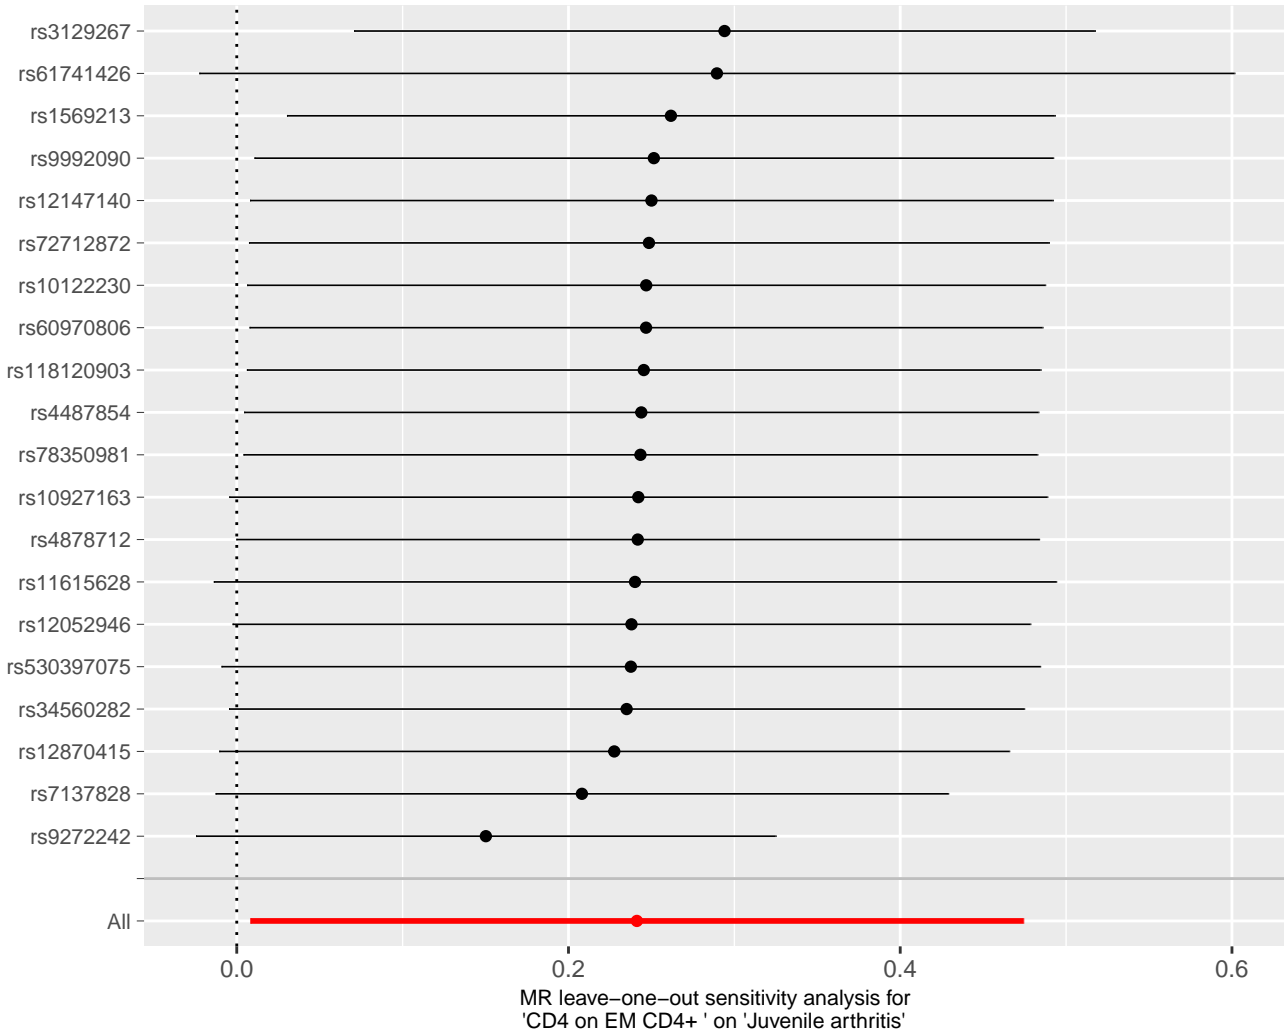

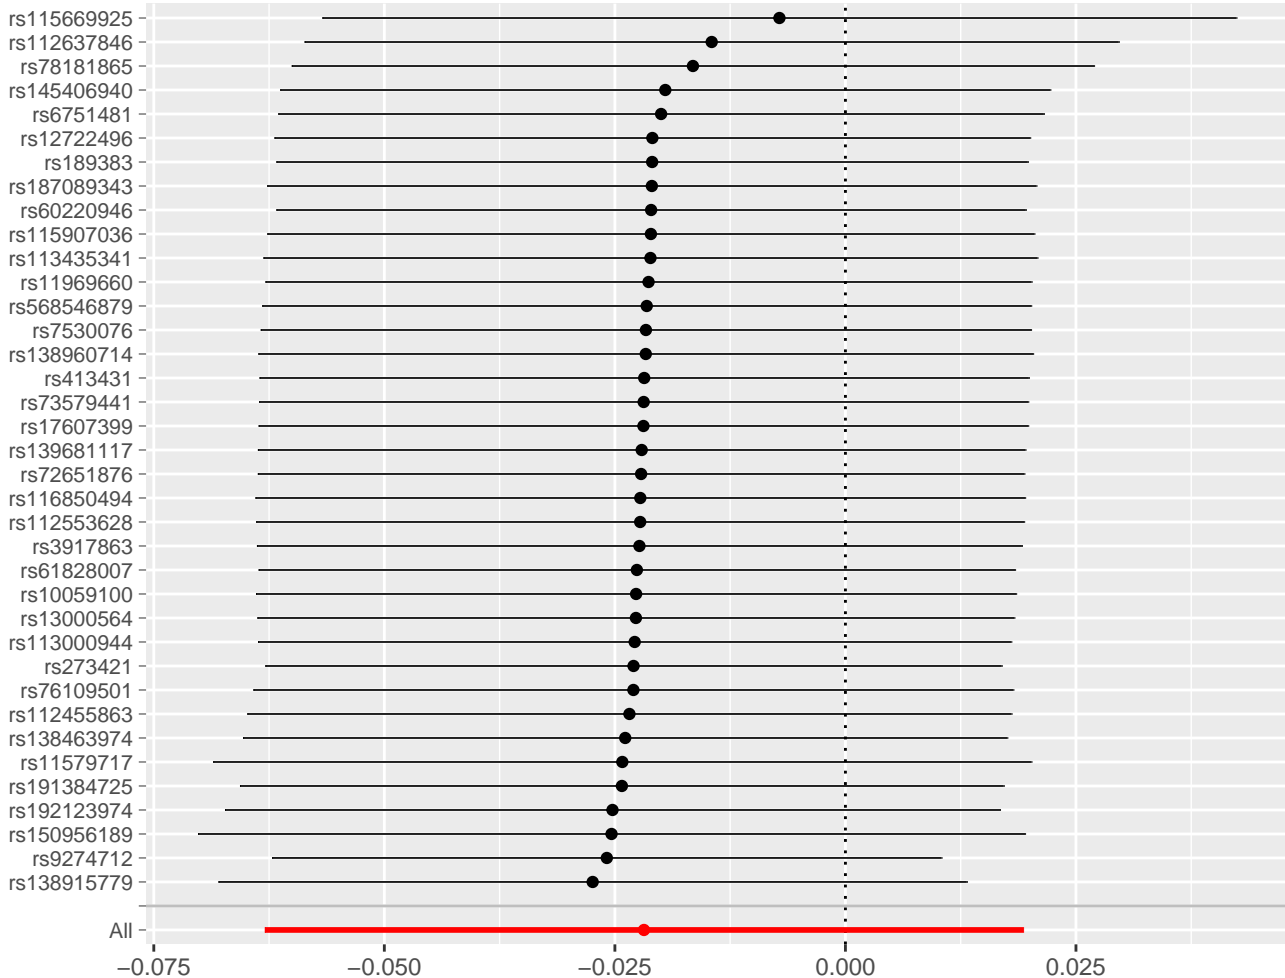

MR leave-one-out sensitivity analysis for  
'Activated & secreting Treg %CD4 Treg' on 'Juvenile arthritis'

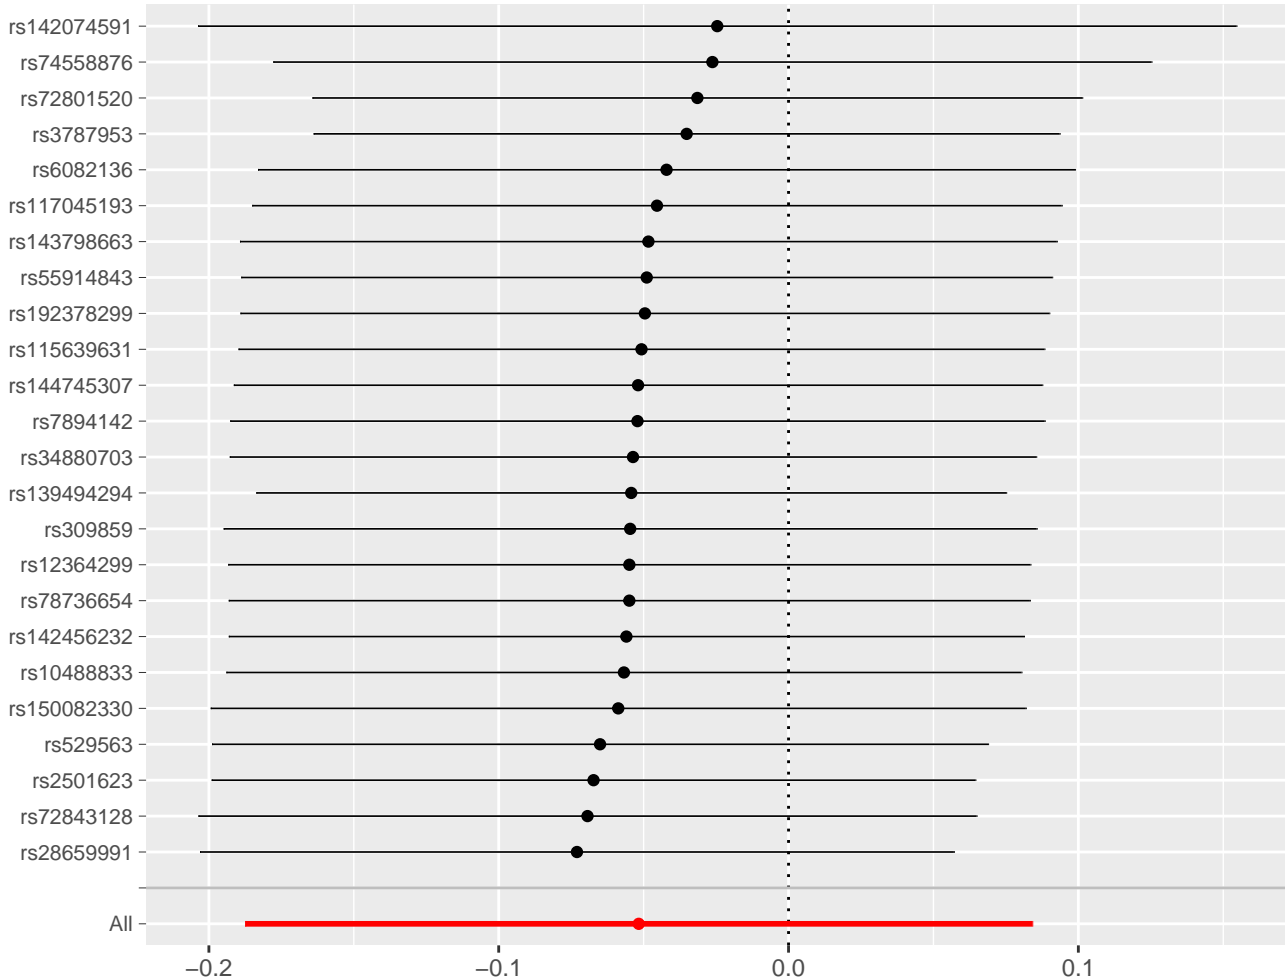

MR leave-one-out sensitivity analysis for 'FSC-A on CD14+ monocyte' on 'Juvenile arthritis'

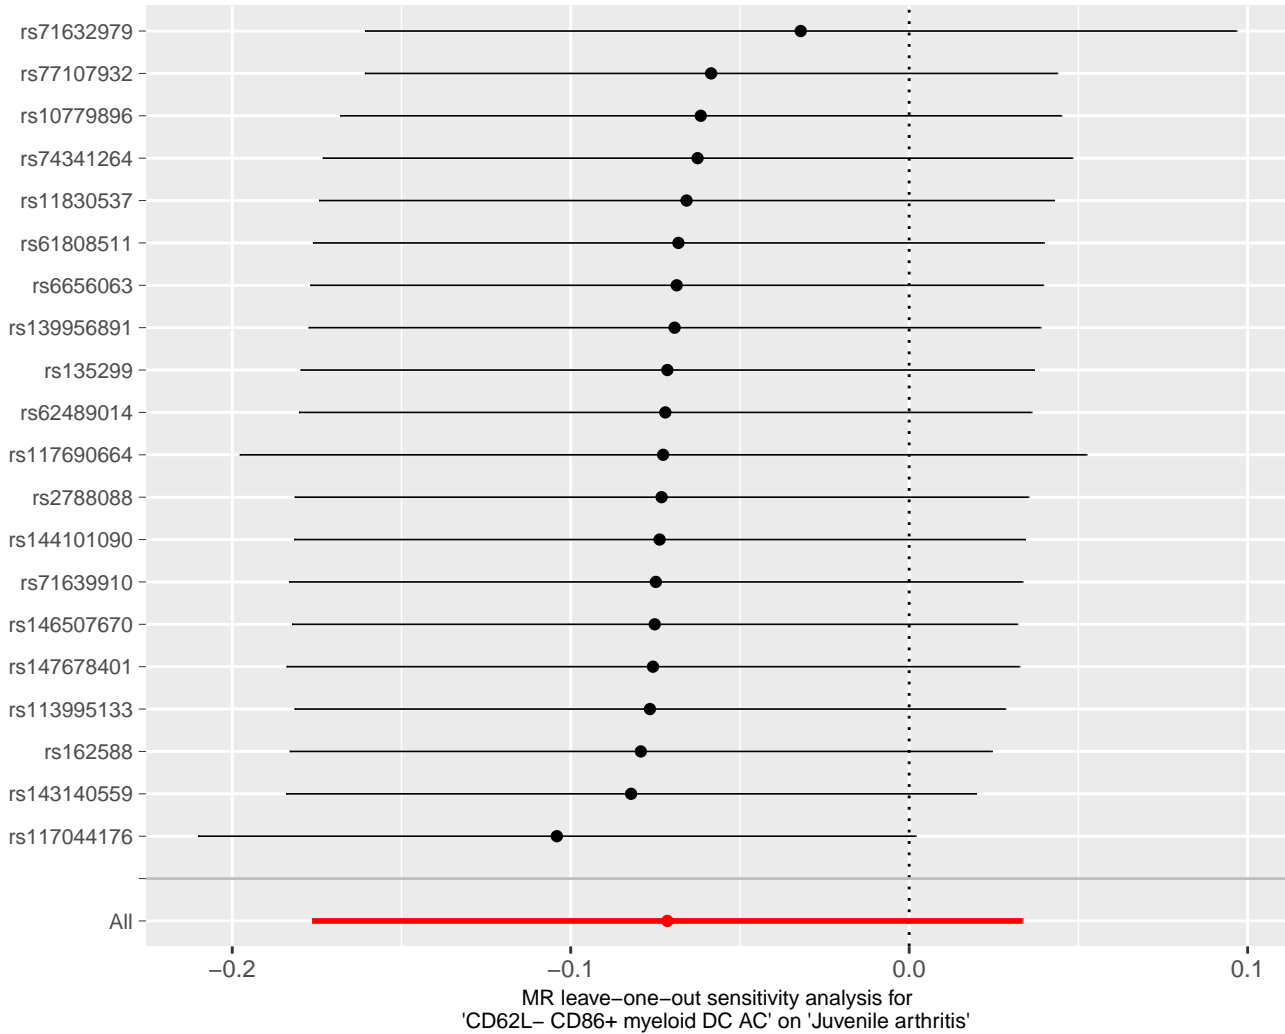



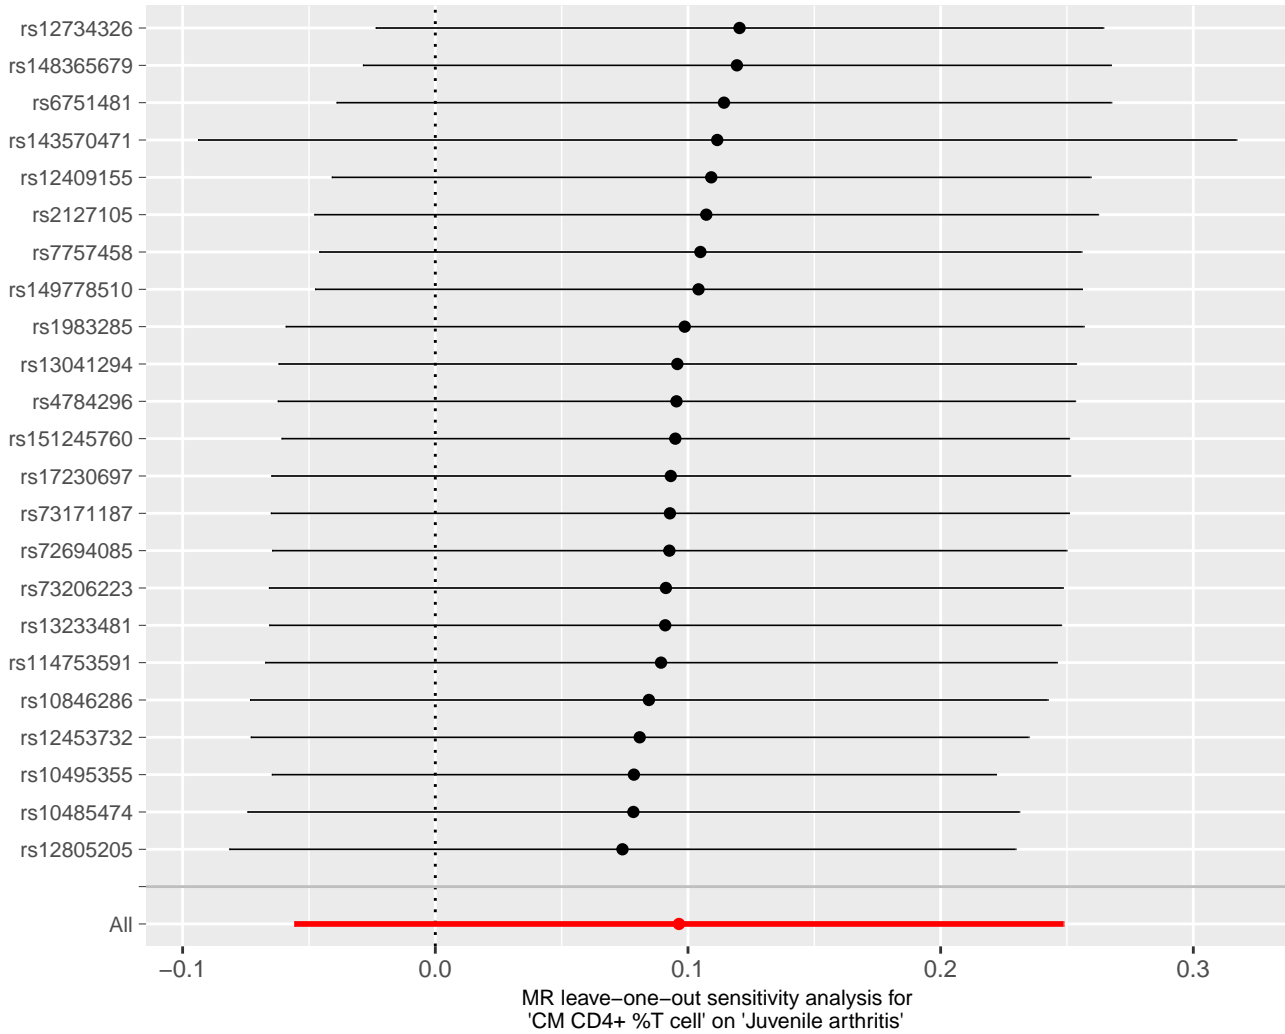

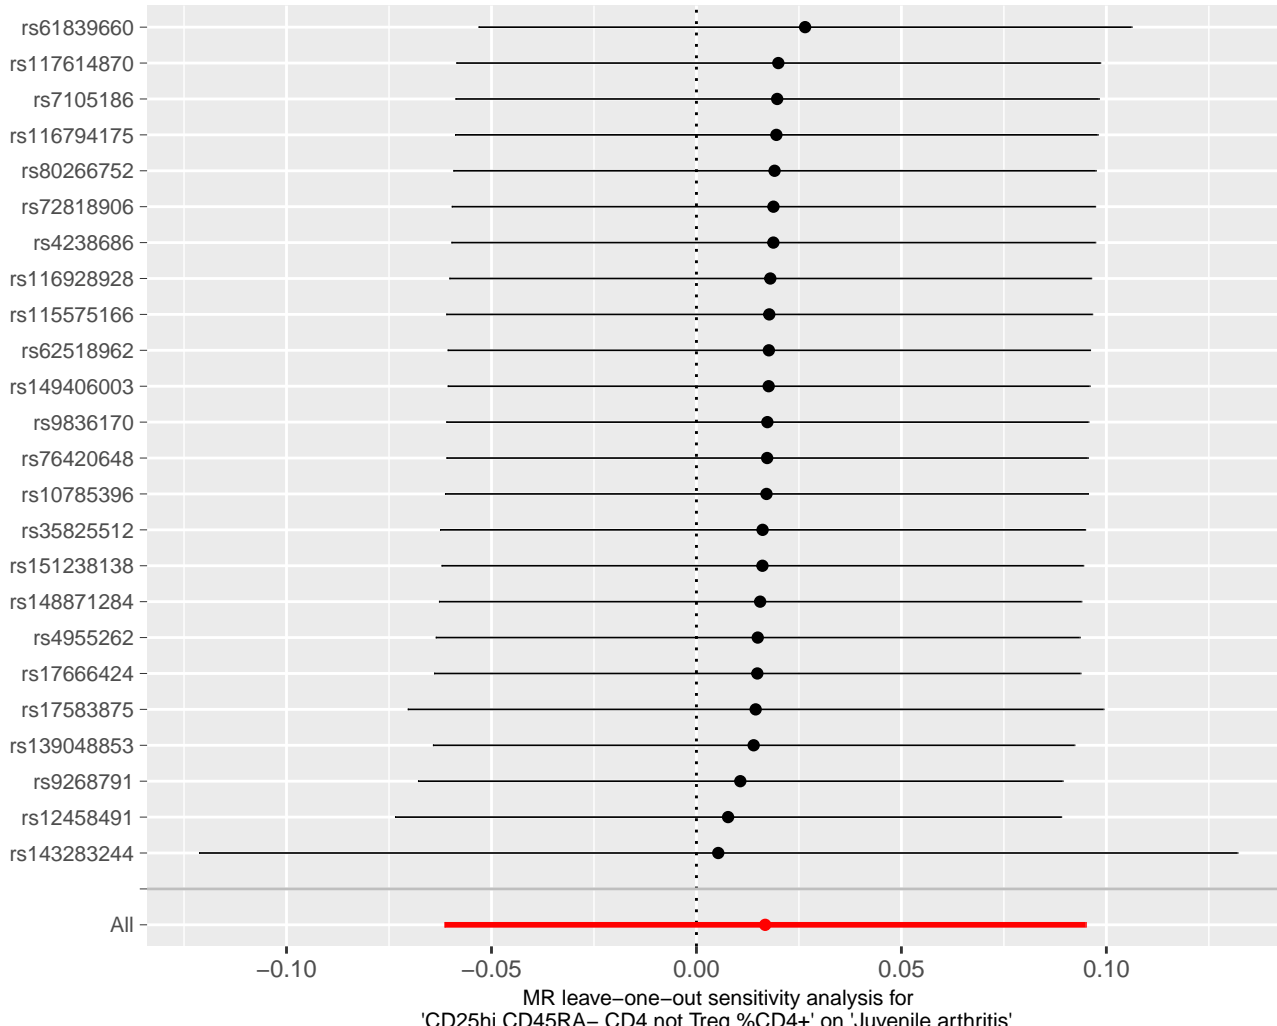

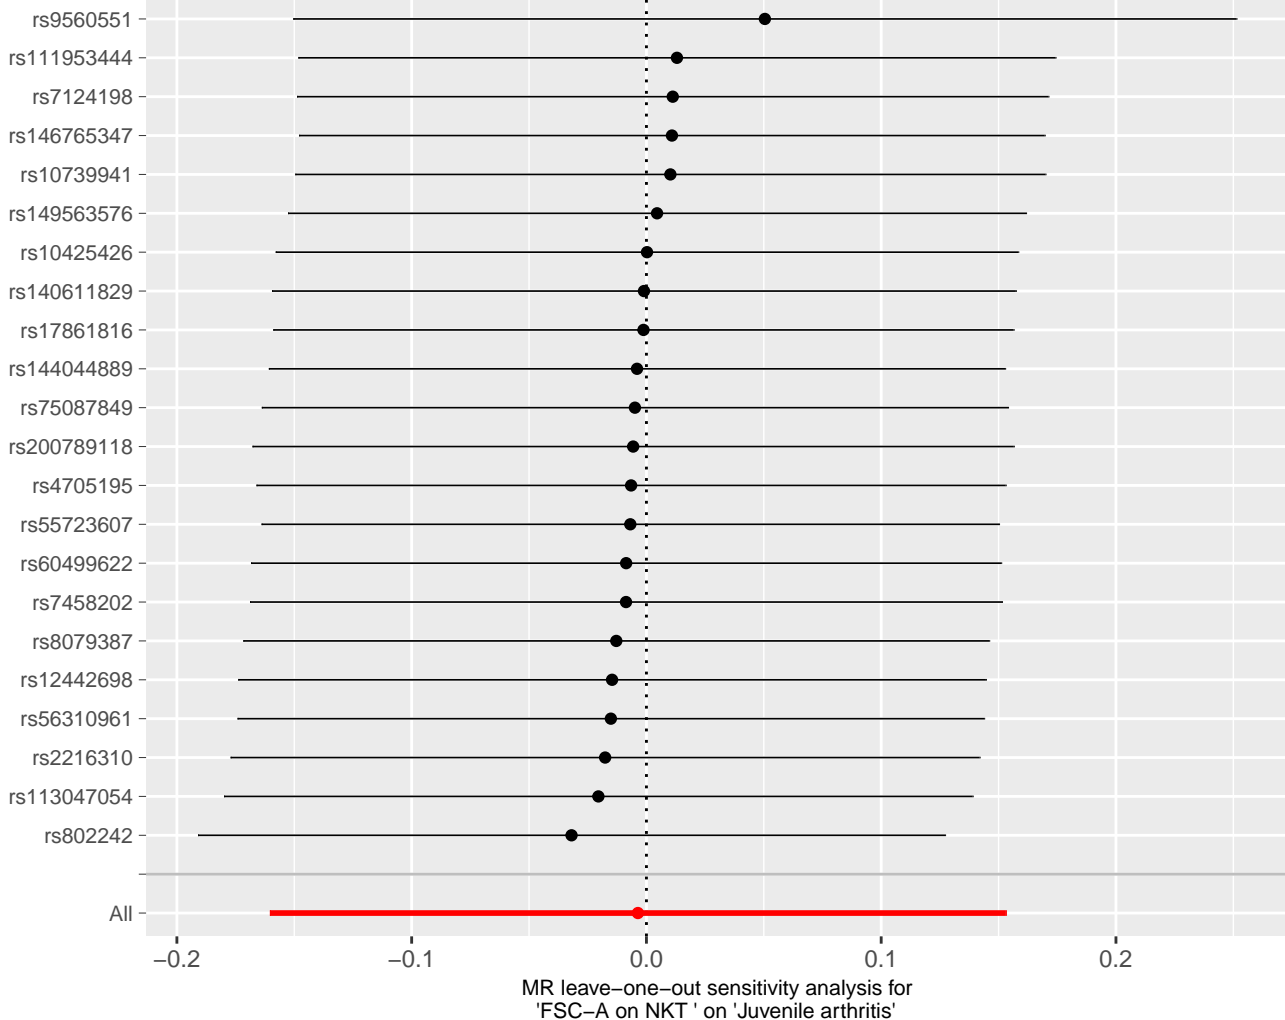

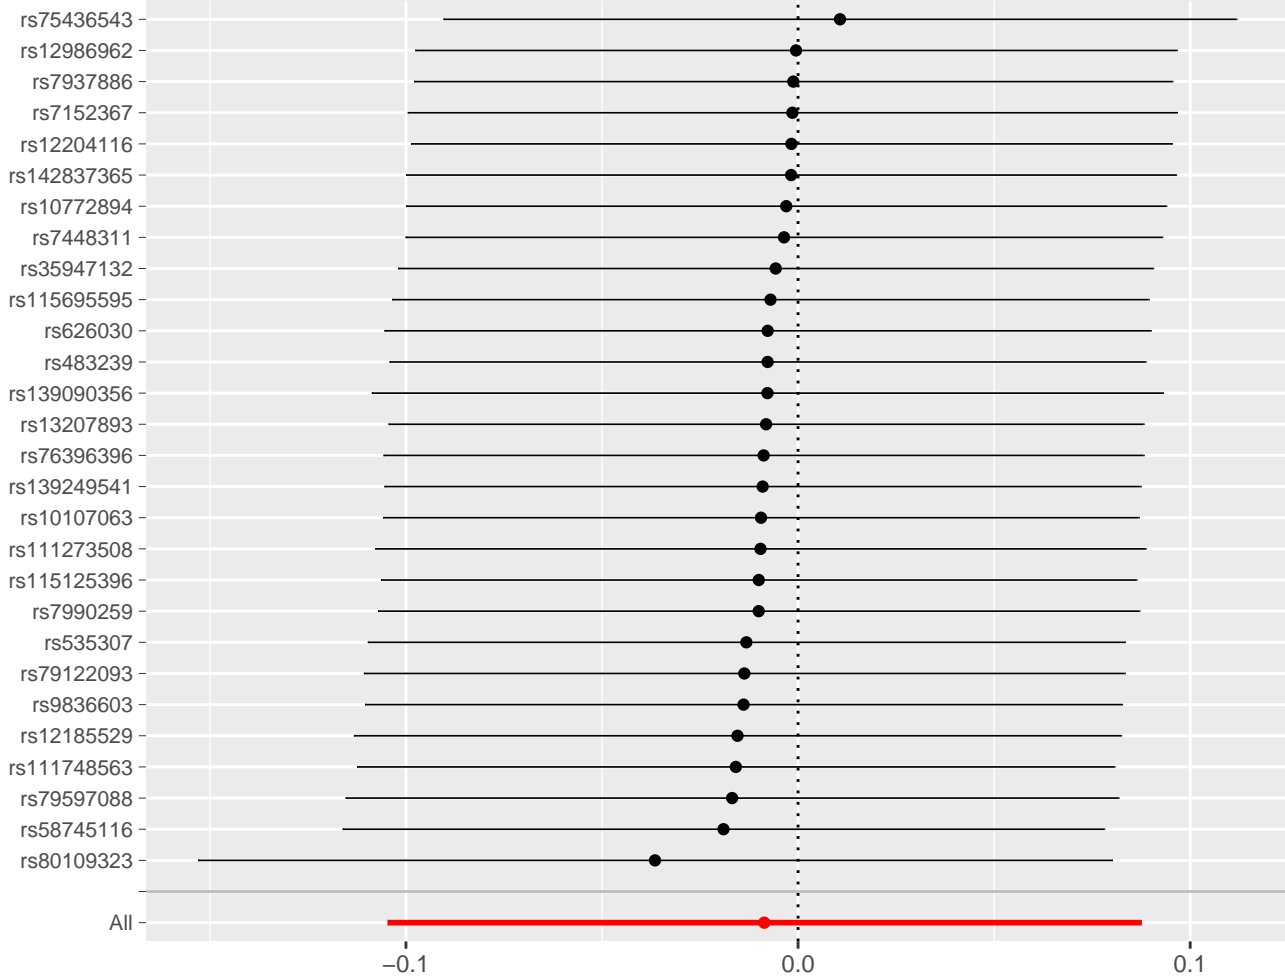

MR leave-one-out sensitivity analysis for 'CD28- CD8dim AC' on 'Juvenile arthritis'

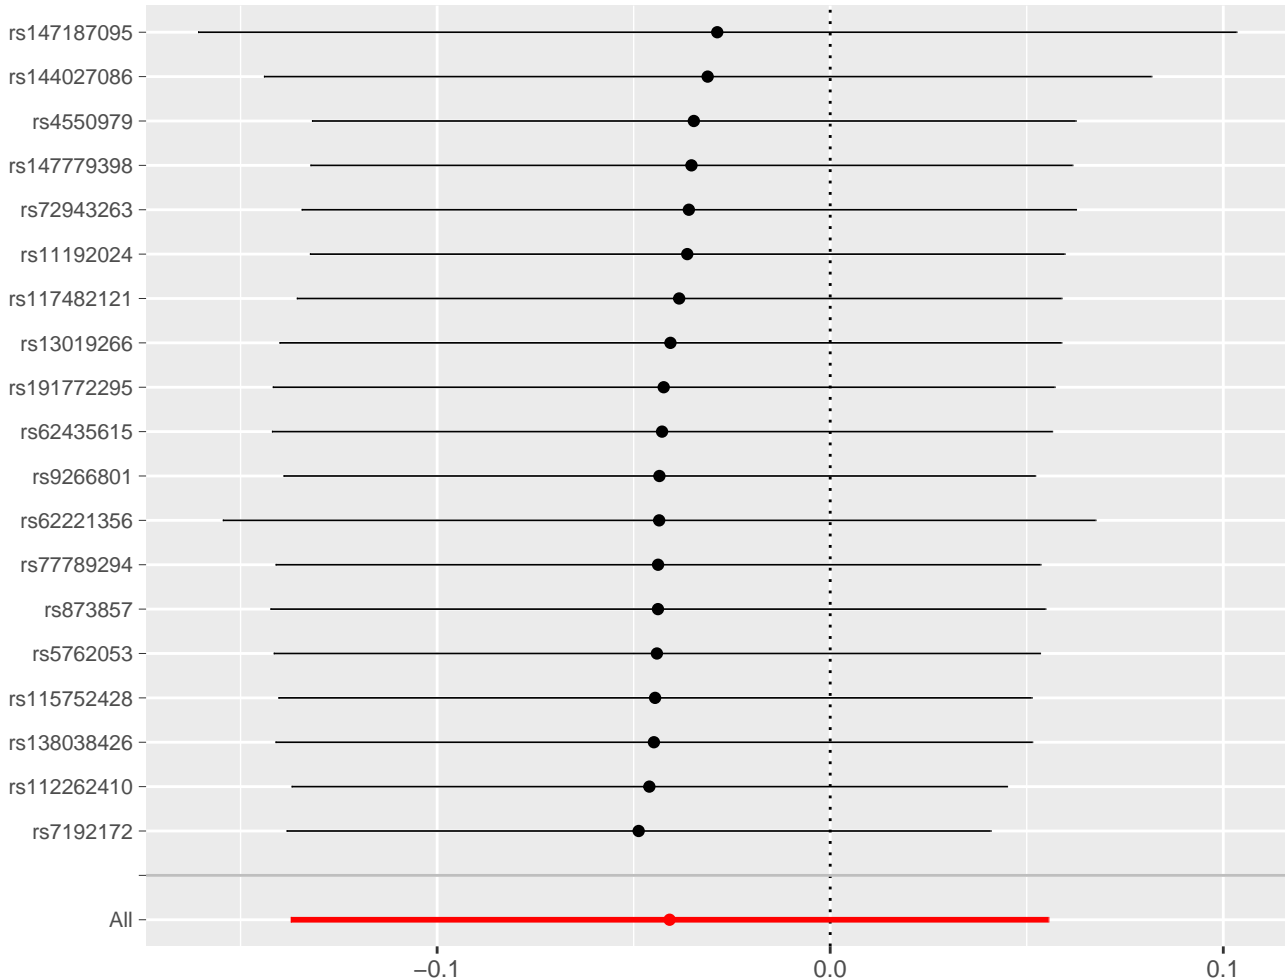

MR leave-one-out sensitivity analysis for 'SSC-A on CD8br' on 'Juvenile arthritis'

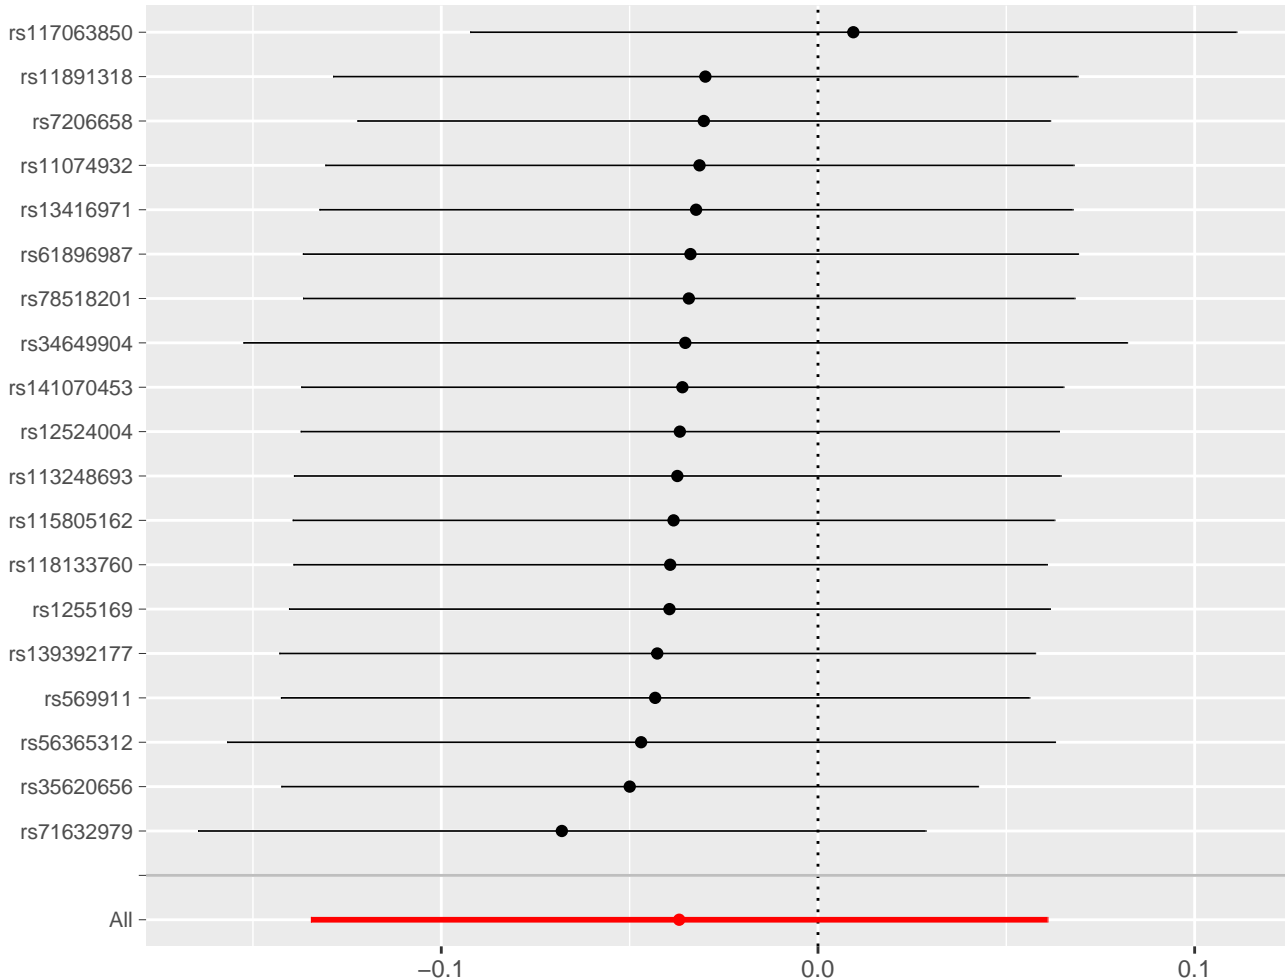

MR leave-one-out sensitivity analysis for 'FSC-A on HLA DR+ NK' on 'Juvenile arthritis'

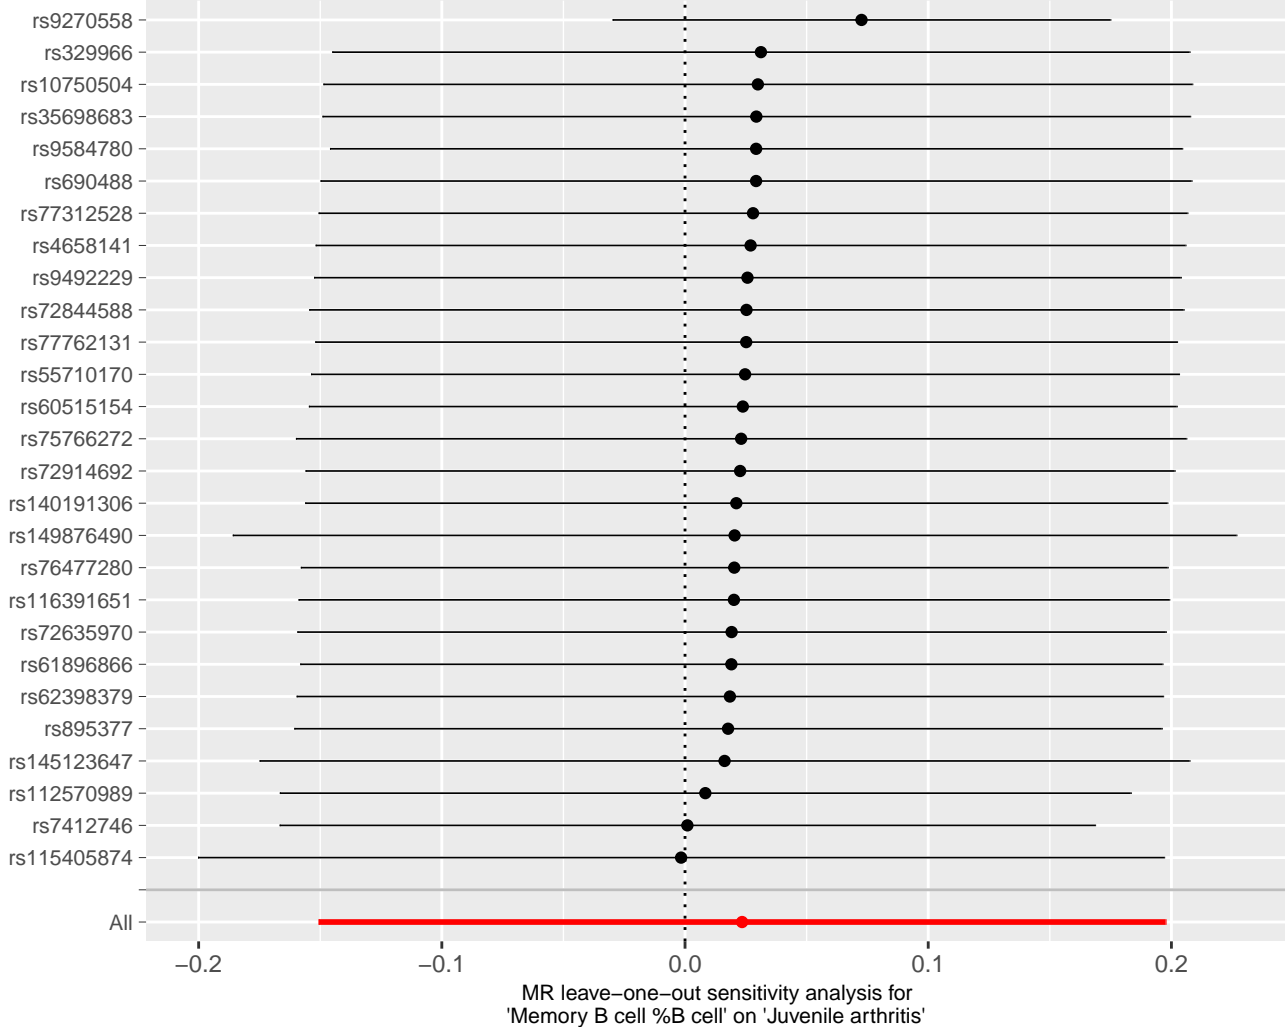

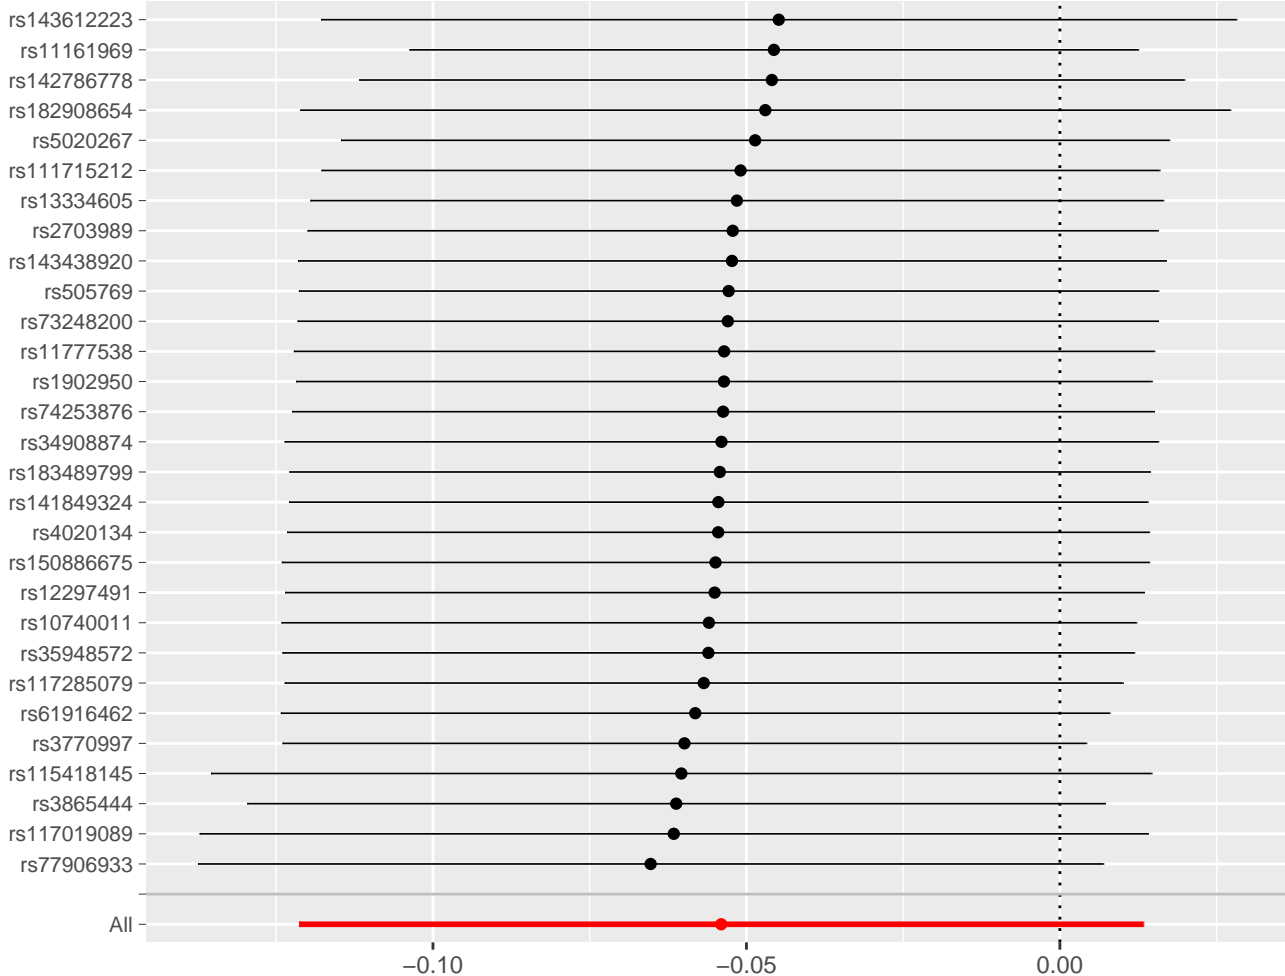

MR leave-one-out sensitivity analysis for 'CD33br HLA DR+ AC' on 'Juvenile arthritis'



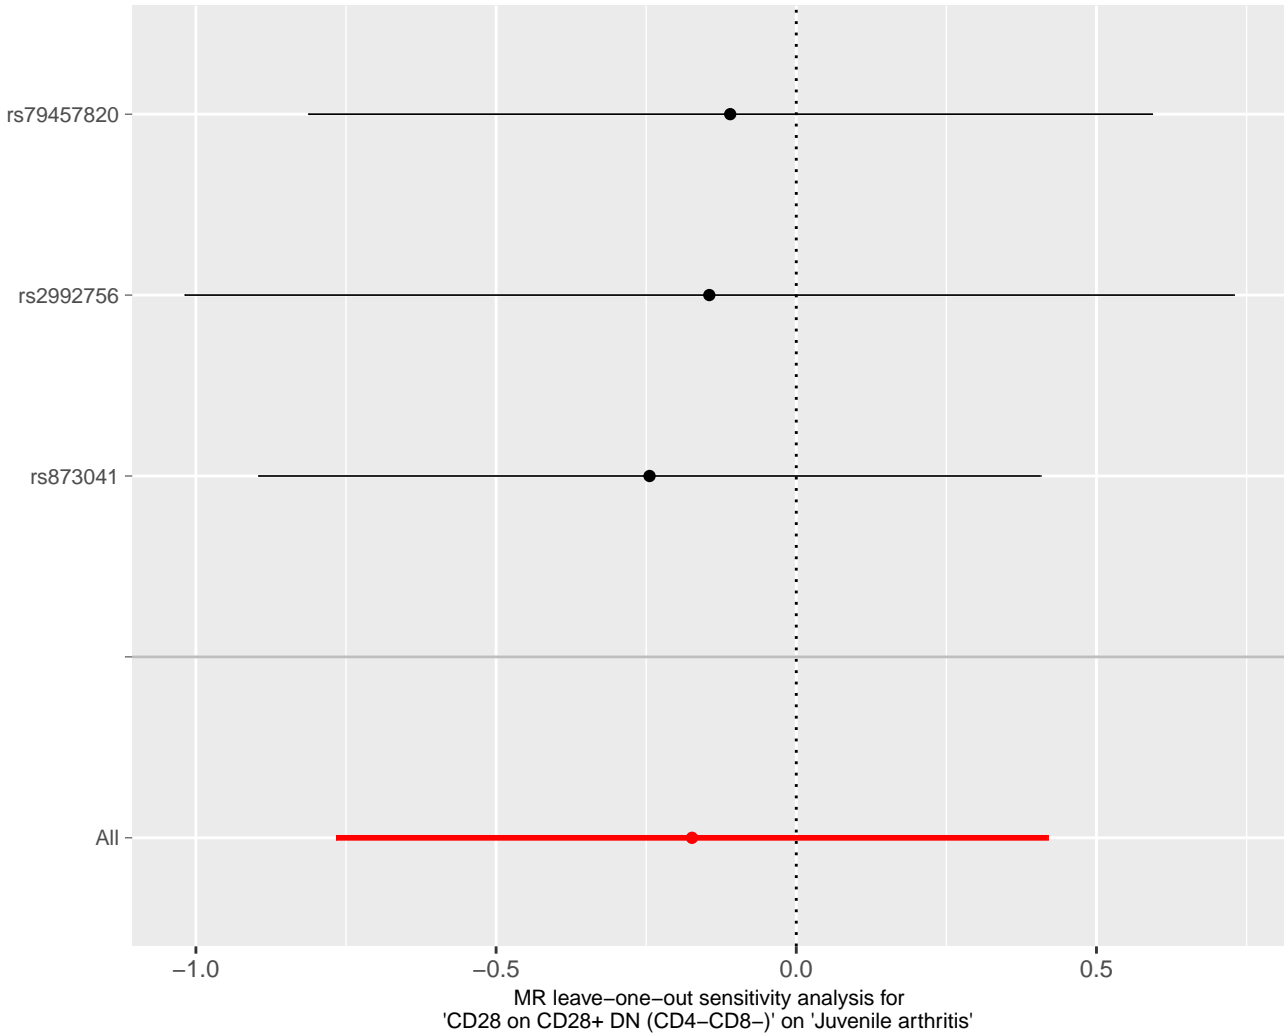

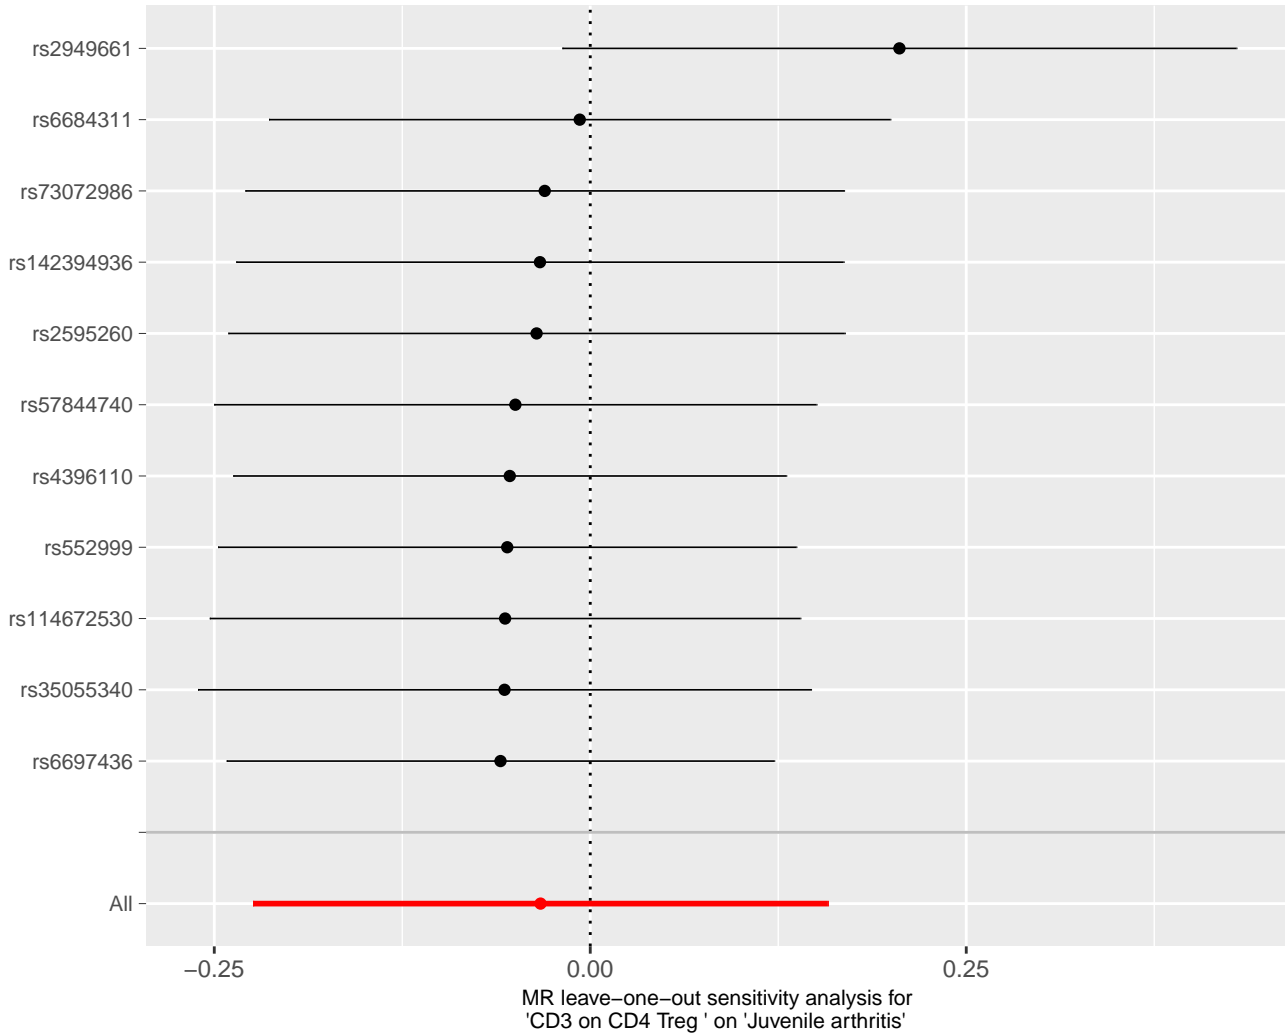

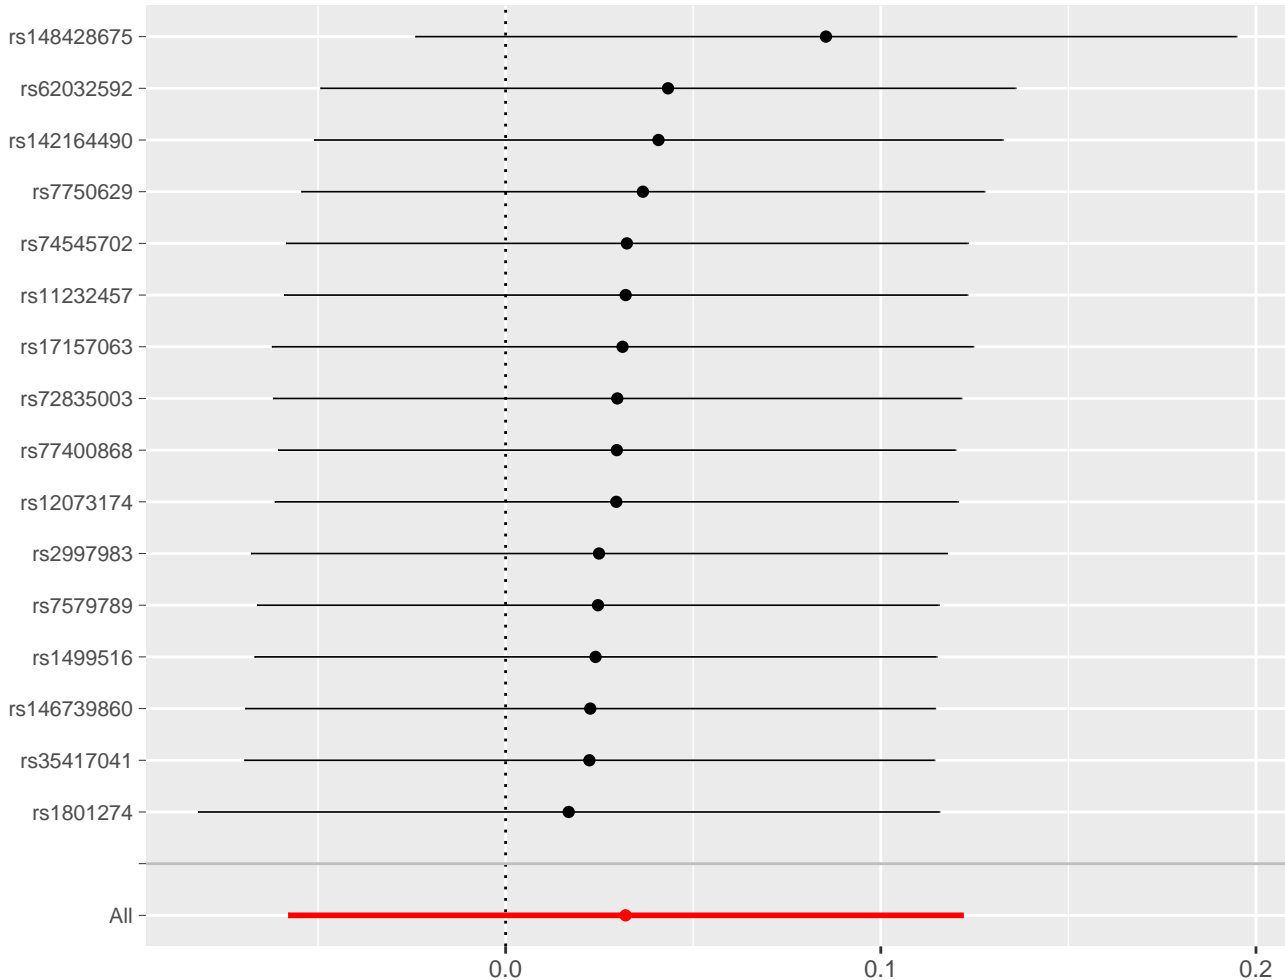

MR leave-one-out sensitivity analysis for 'CD11b on Mo MDSC ' on 'Juvenile arthritis'

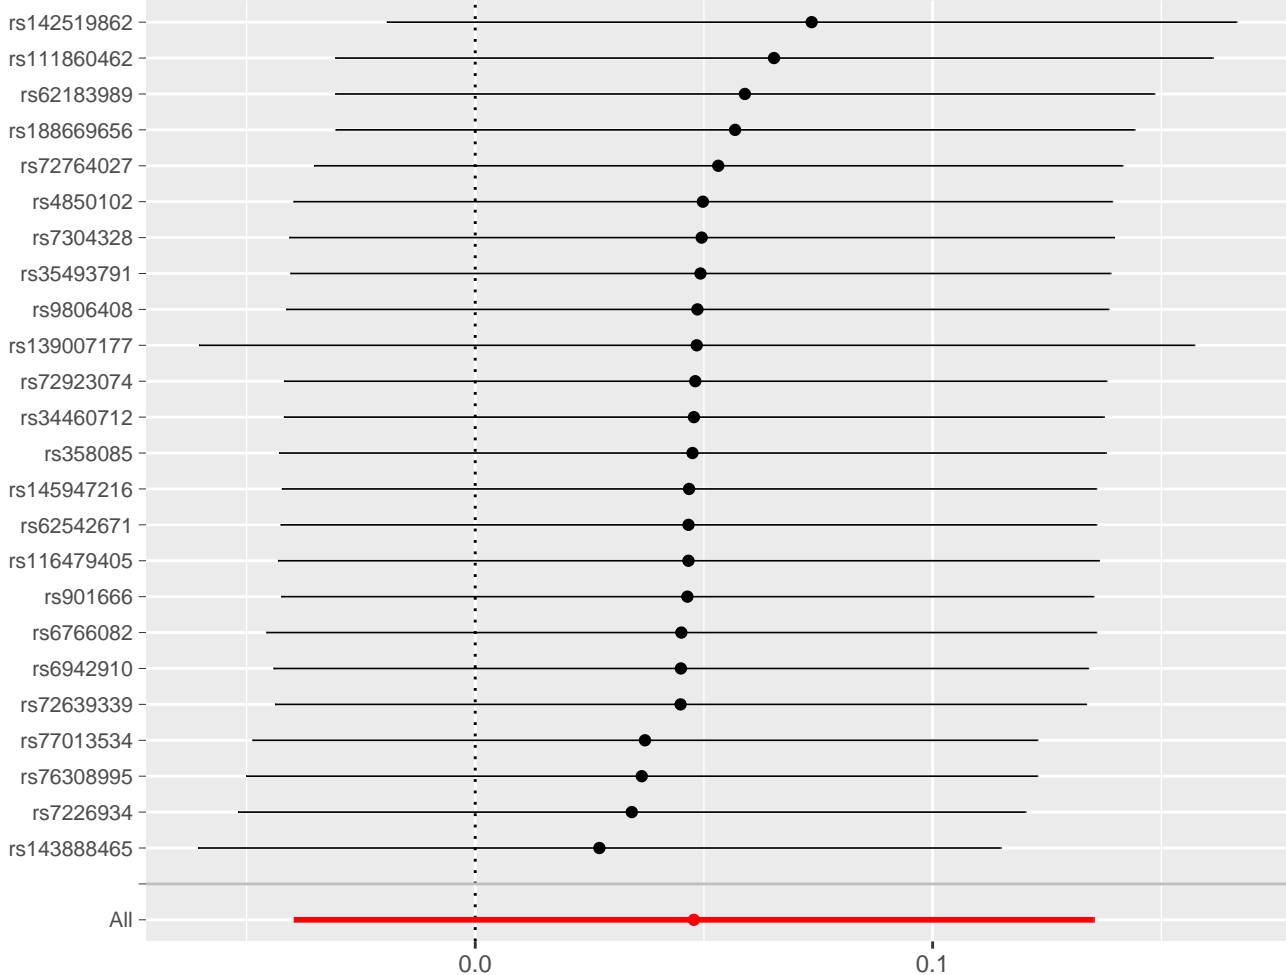

MR leave-one-out sensitivity analysis for  
'CD28 on activated & secreting Treg' on 'Juvenile arthritis'

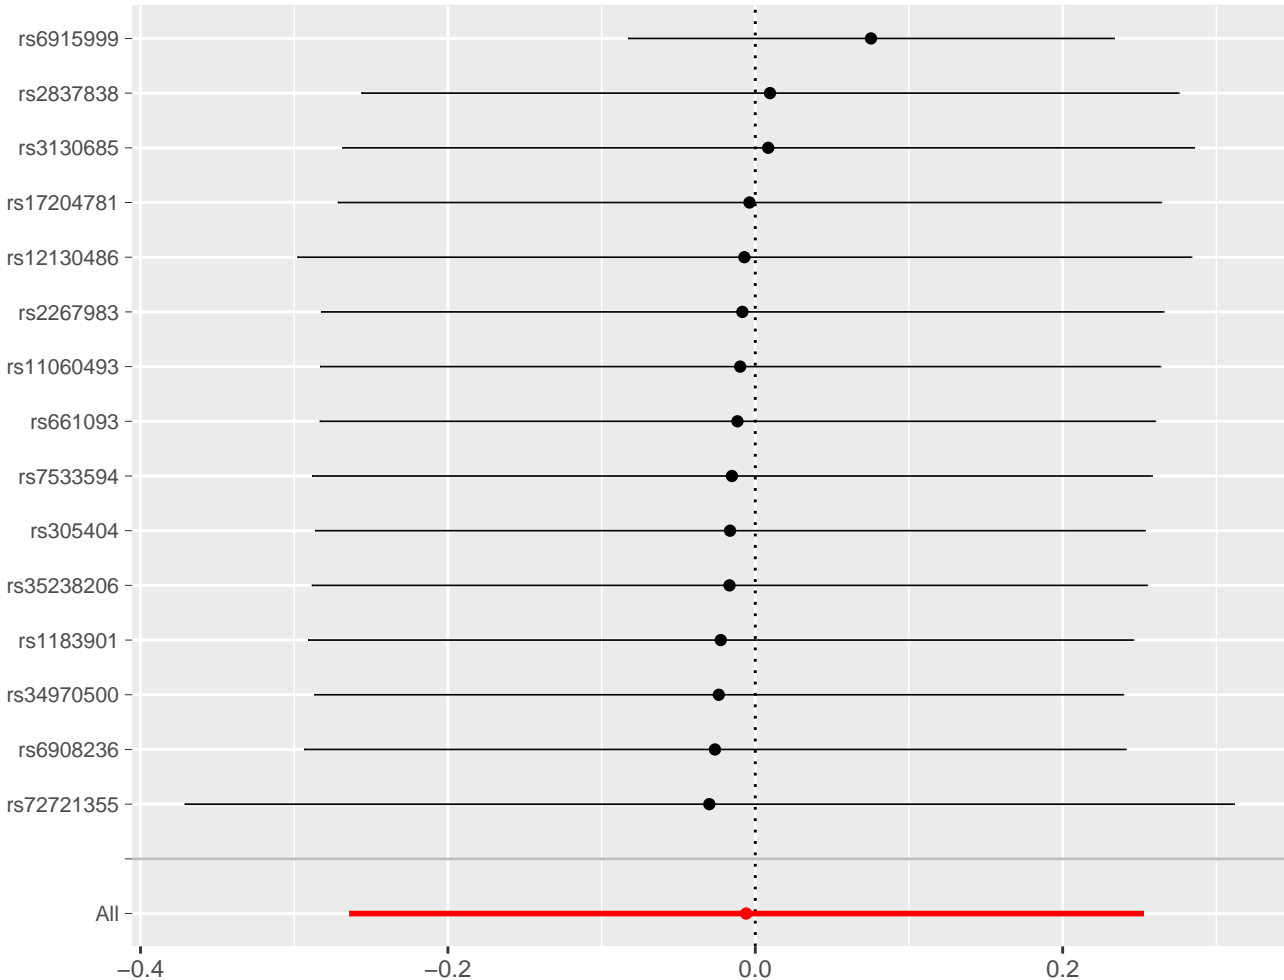

MR leave-one-out sensitivity analysis for 'CD127- CD8br AC' on 'Juvenile arthritis'

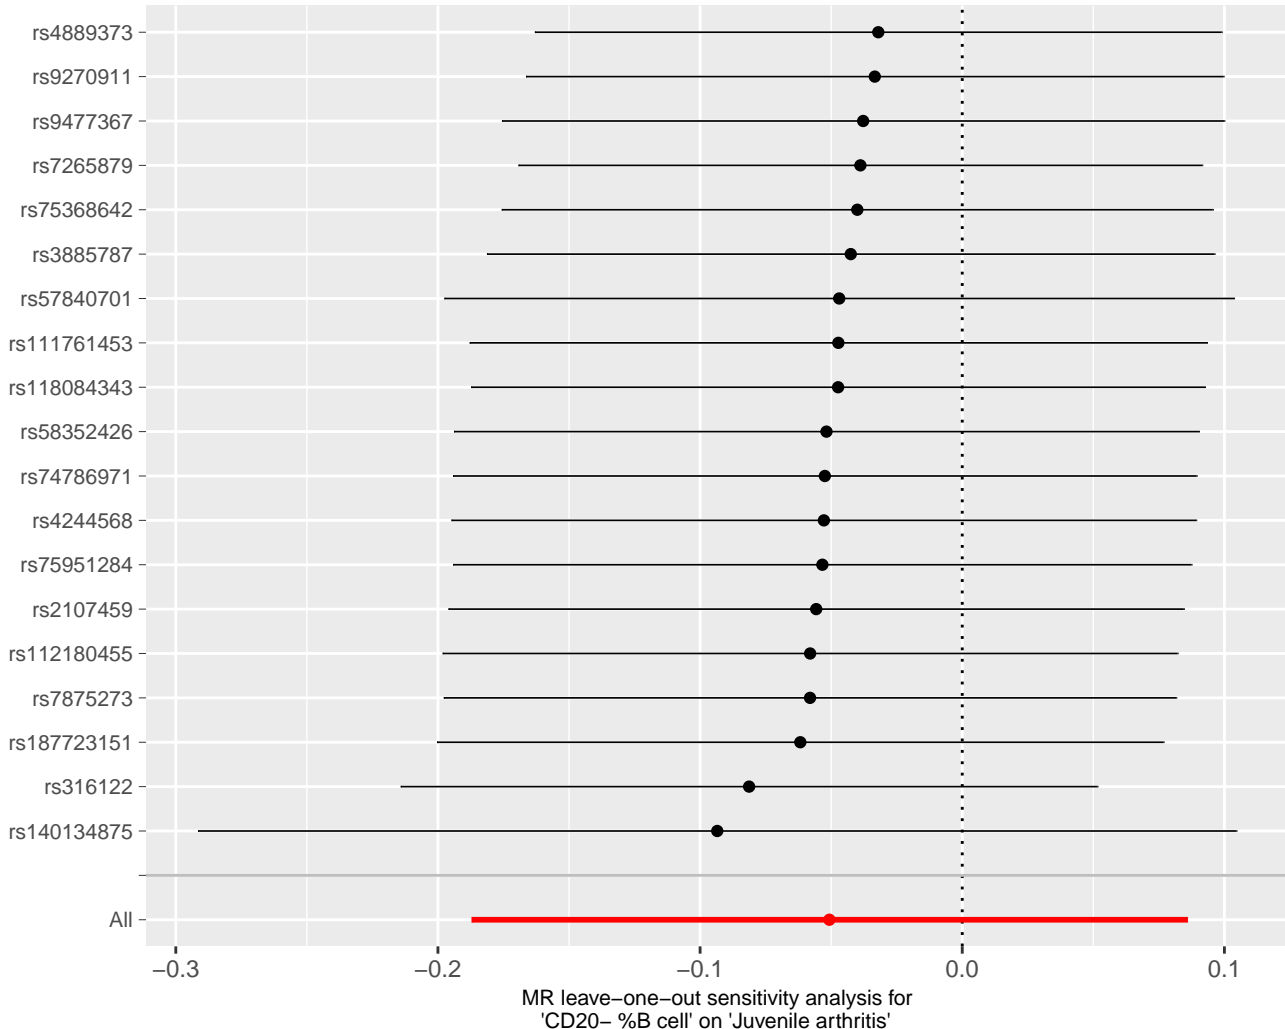

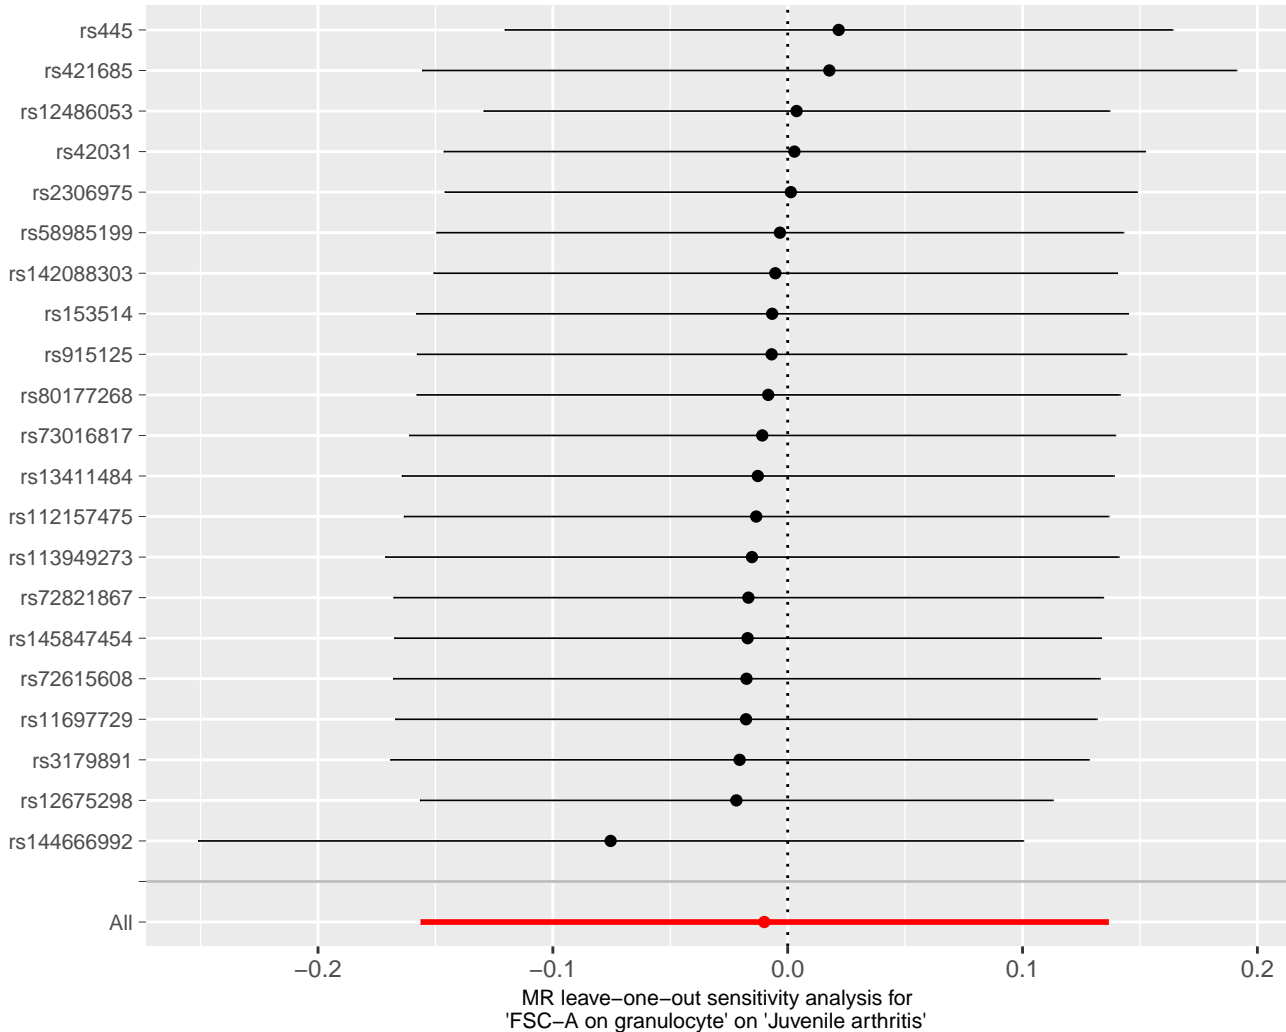

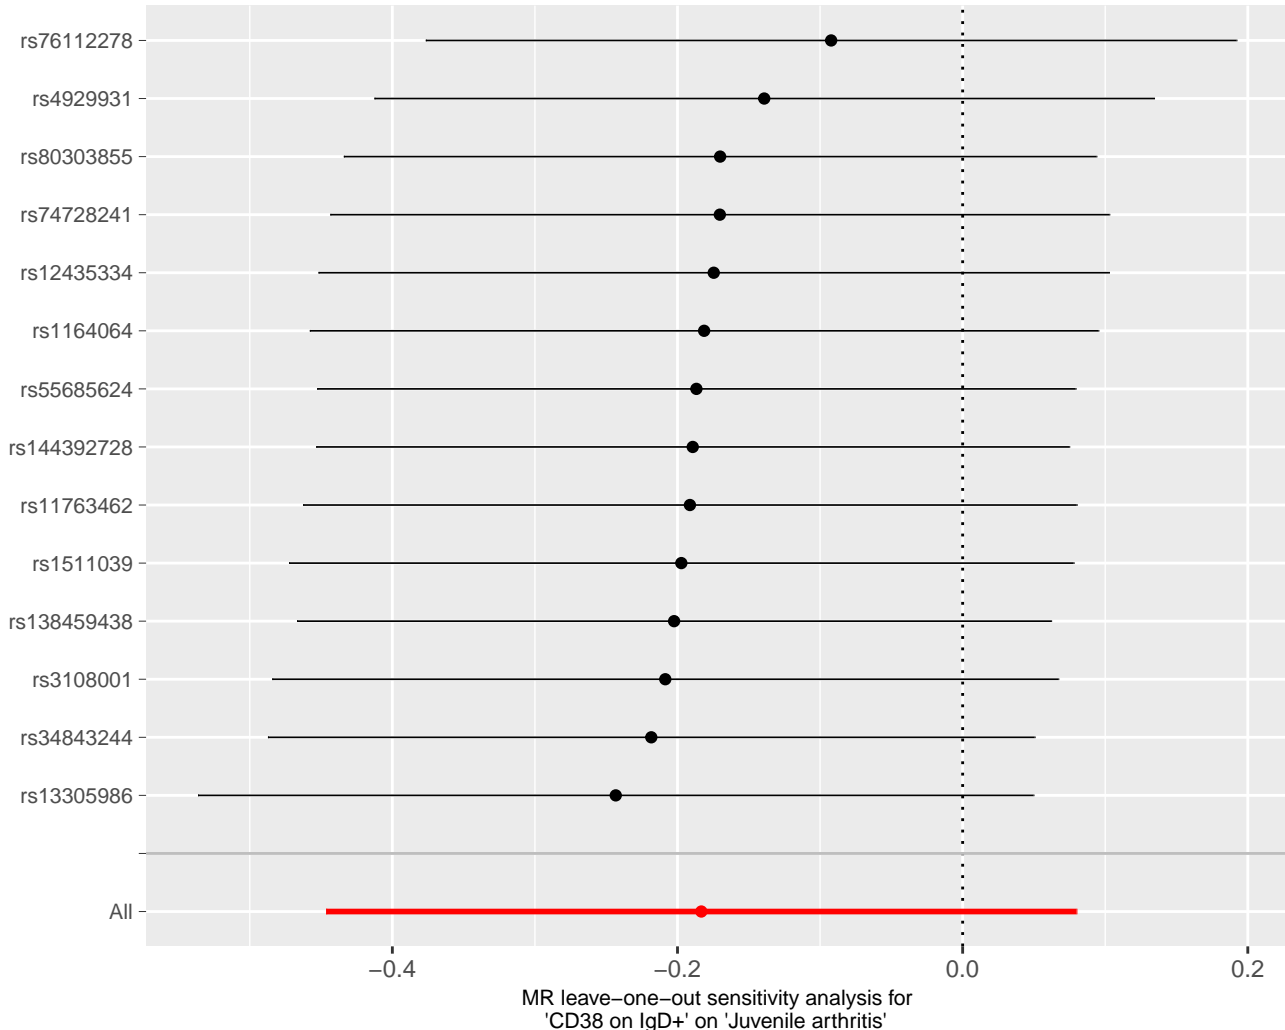



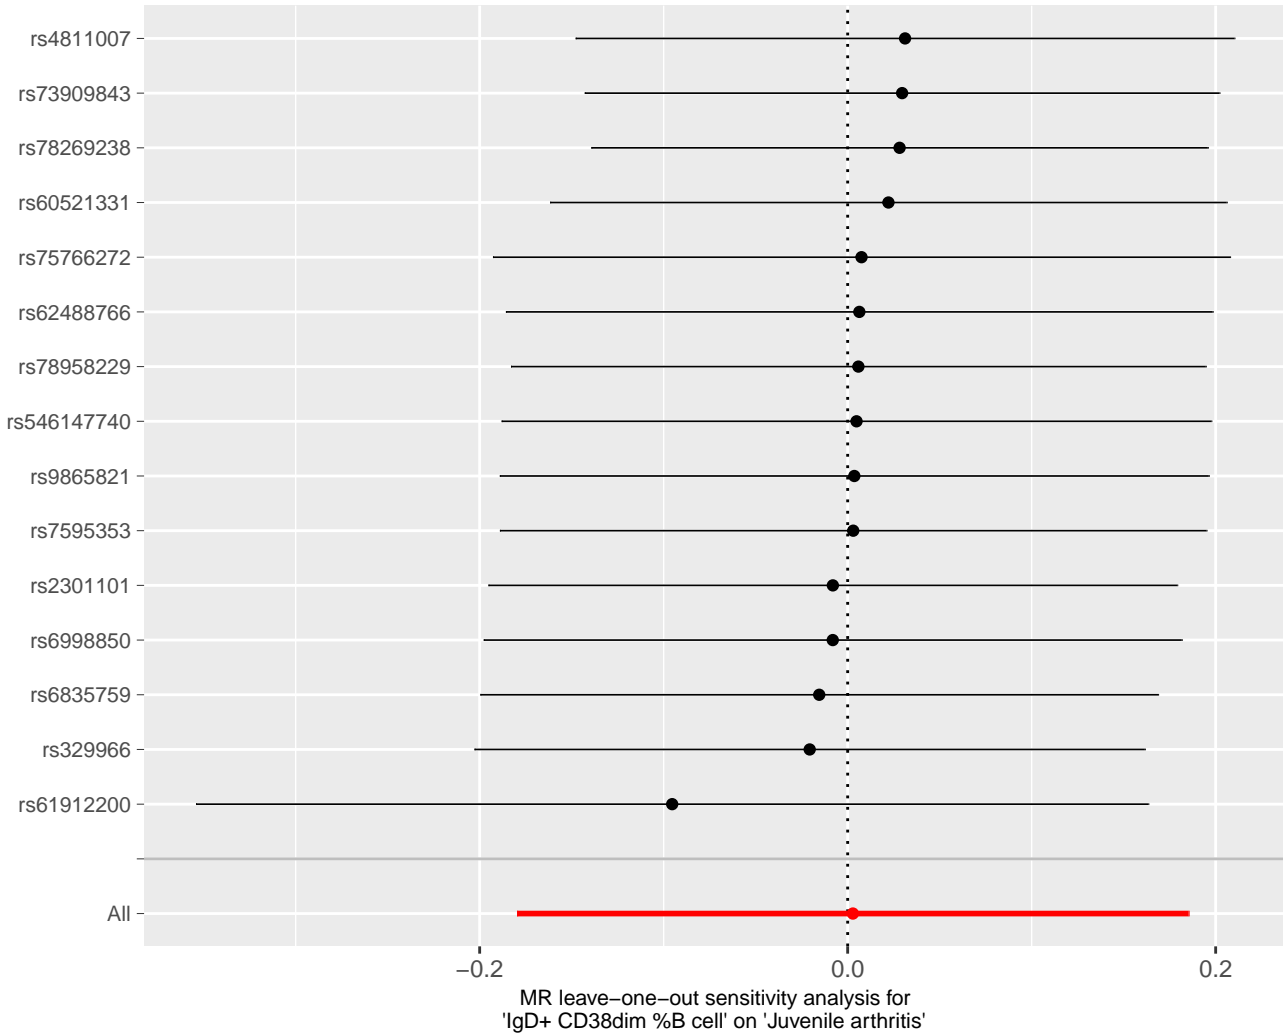

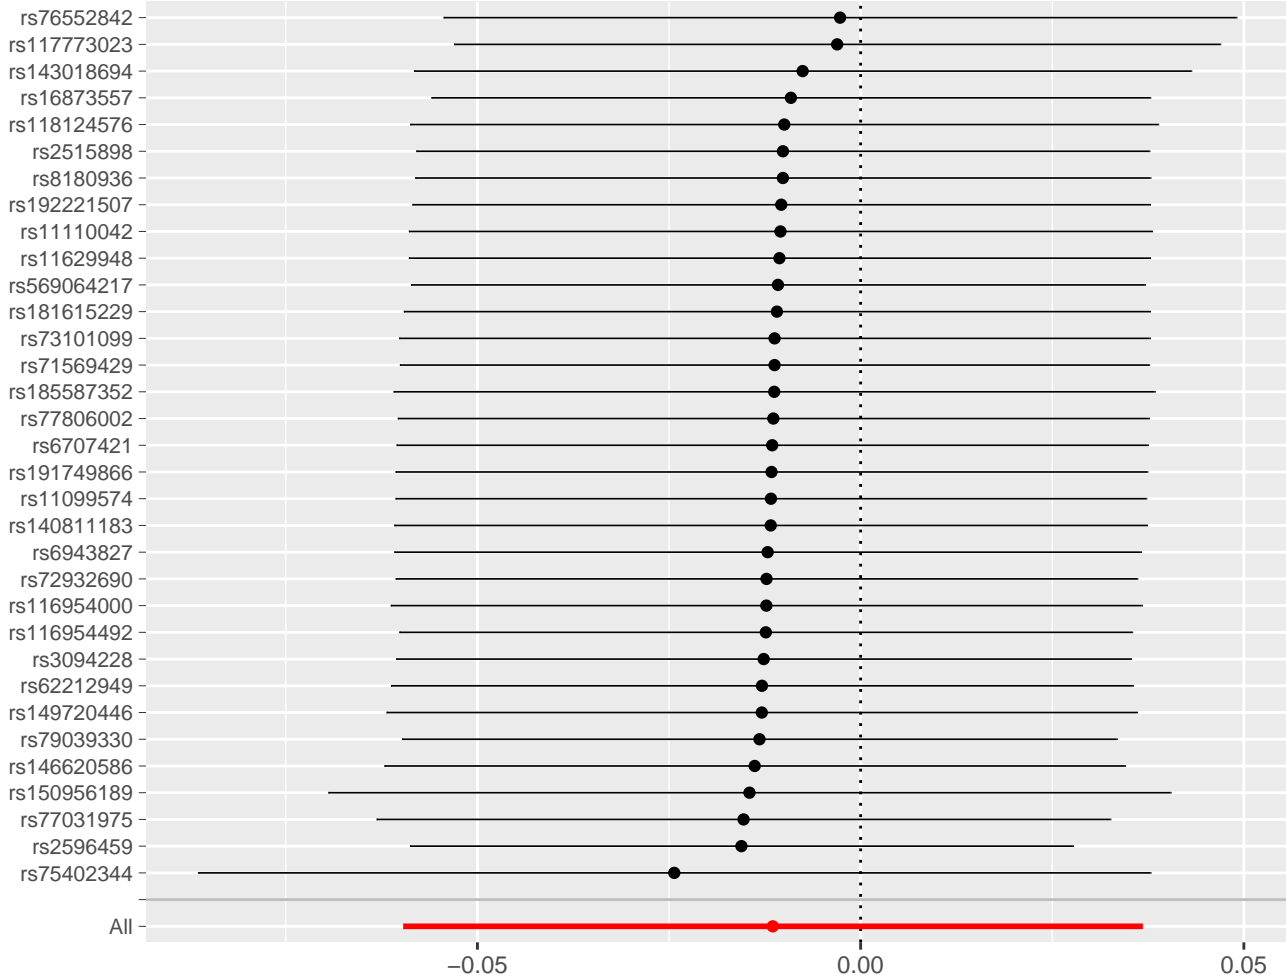

MR leave-one-out sensitivity analysis for 'CD45RA+ CD8br %T cell' on 'Juvenile arthritis'

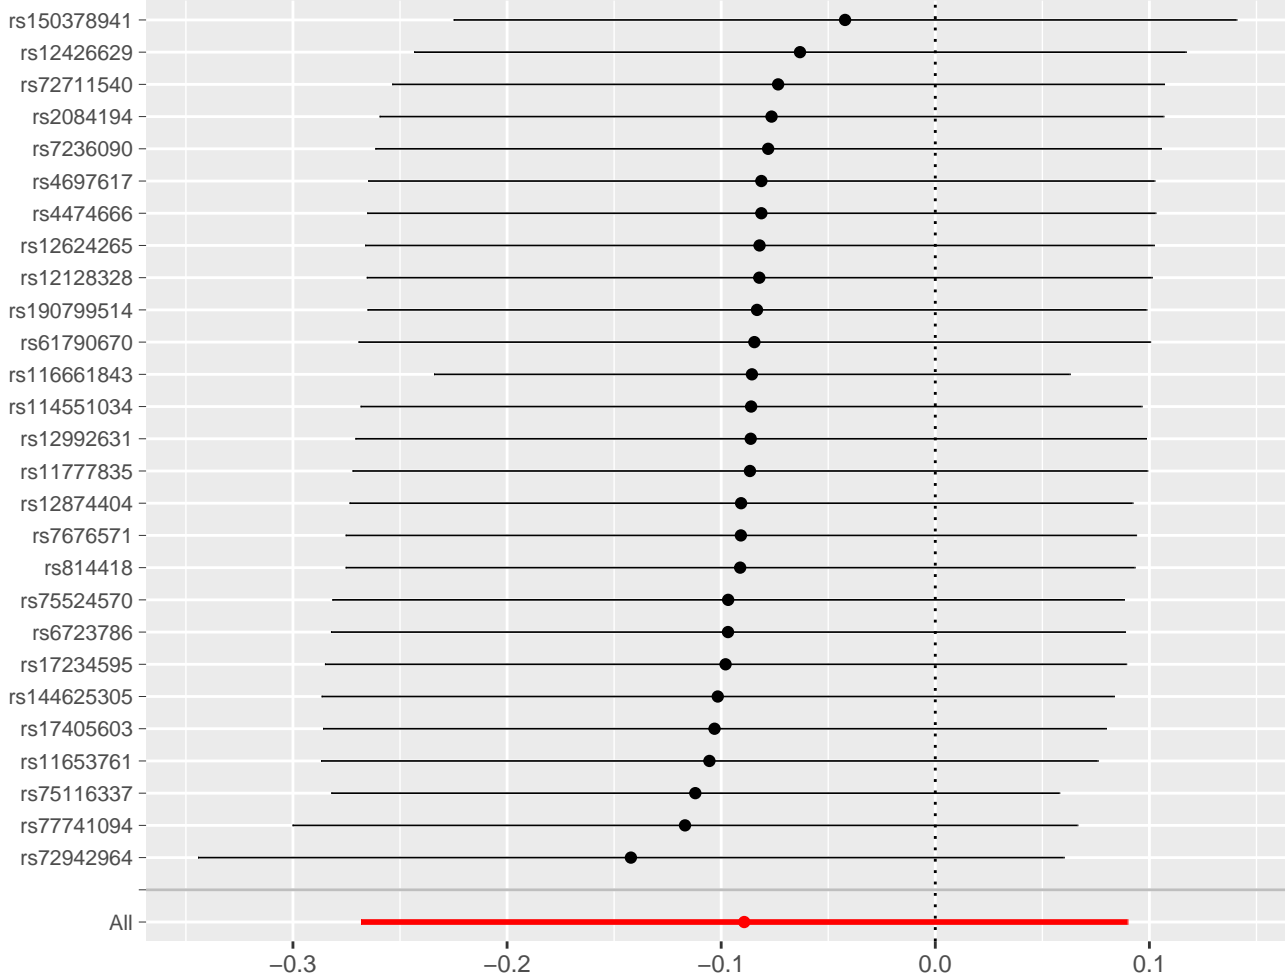

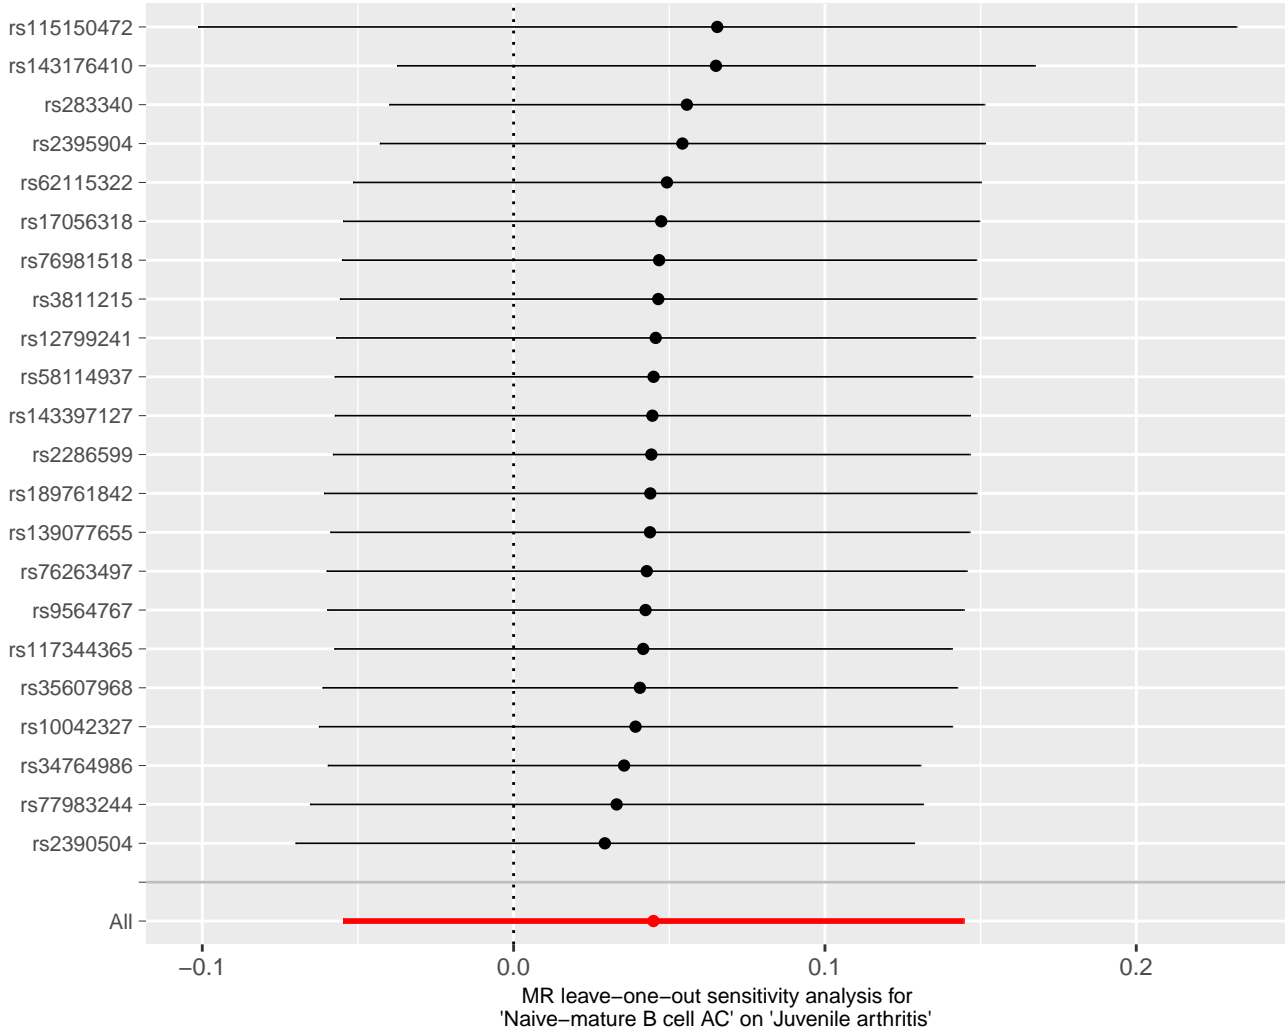

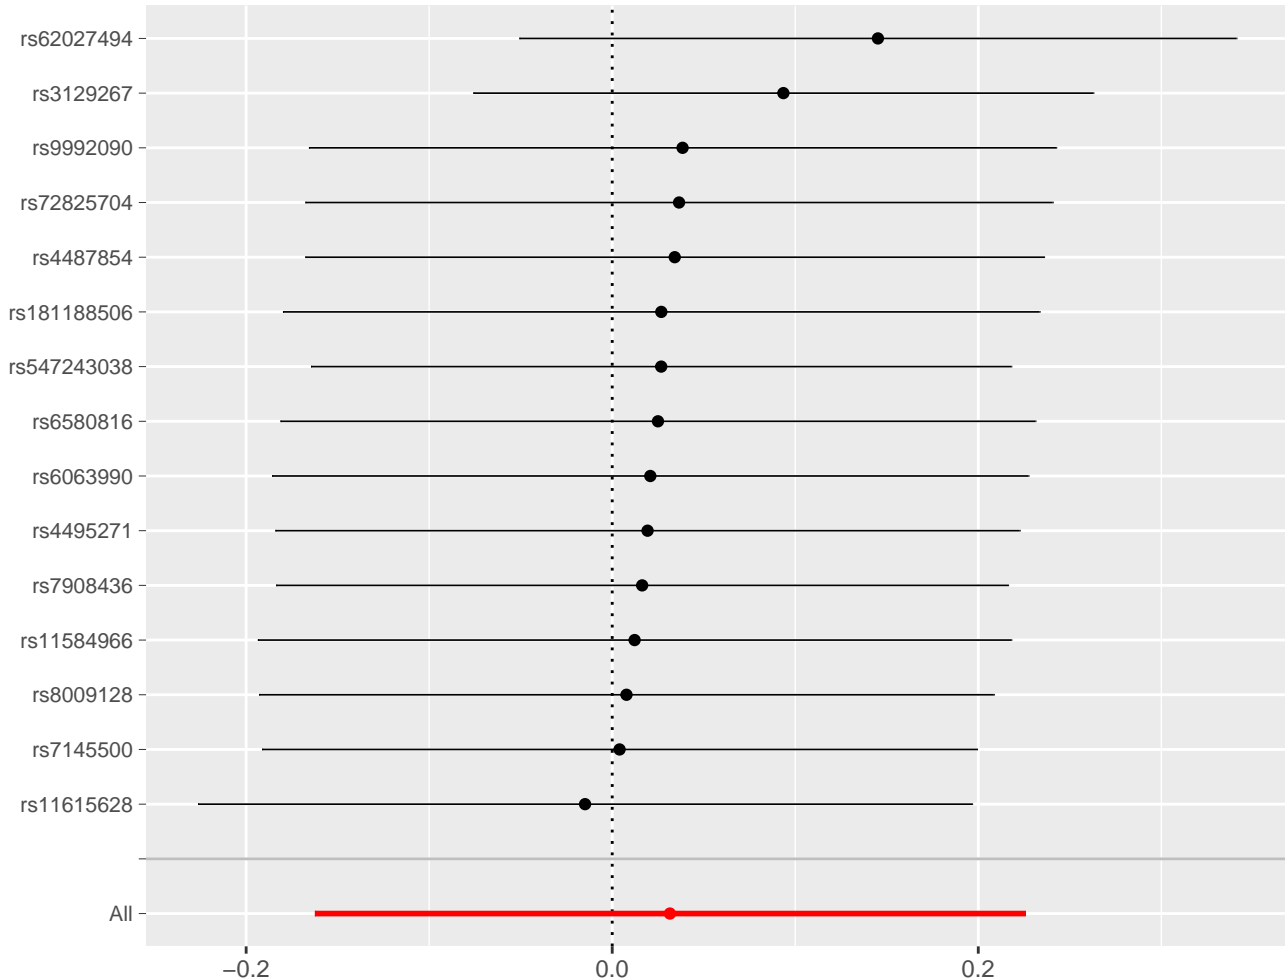

MR leave-one-out sensitivity analysis for 'CD4 on CM CD4 +' on 'Juvenile arthritis'

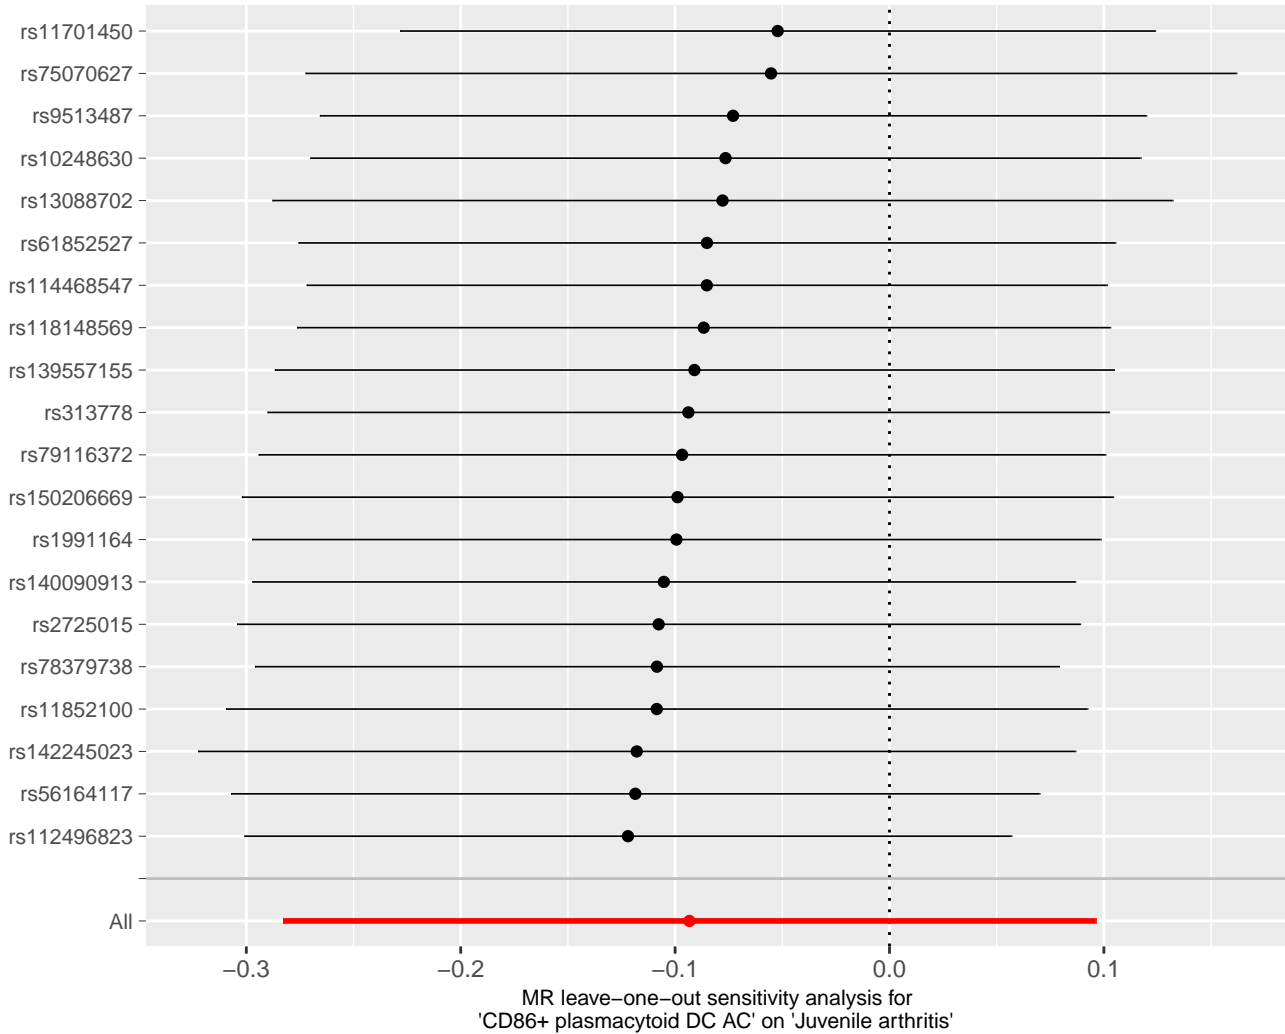

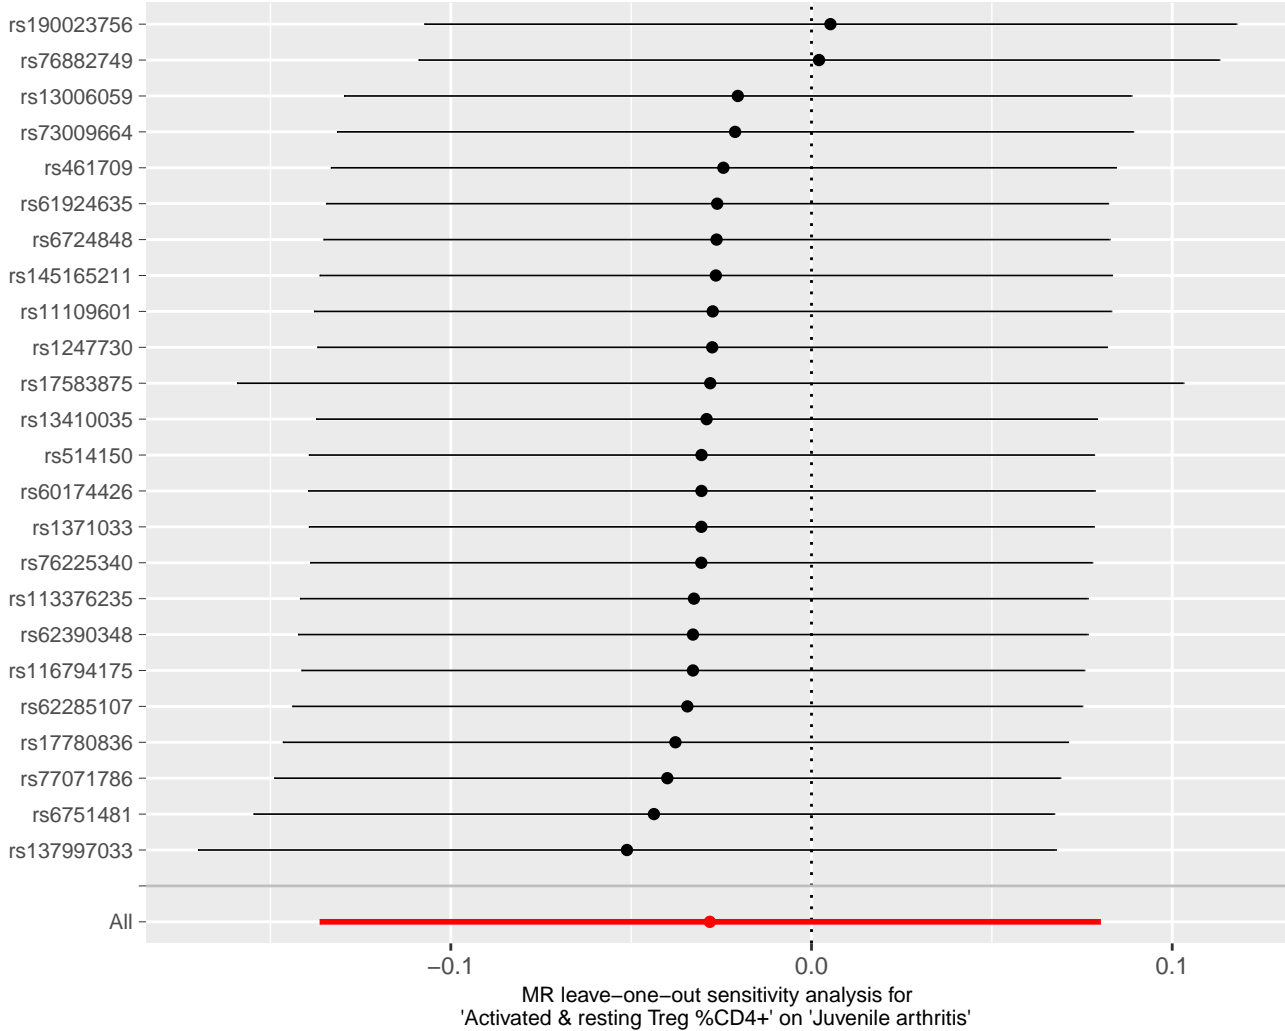

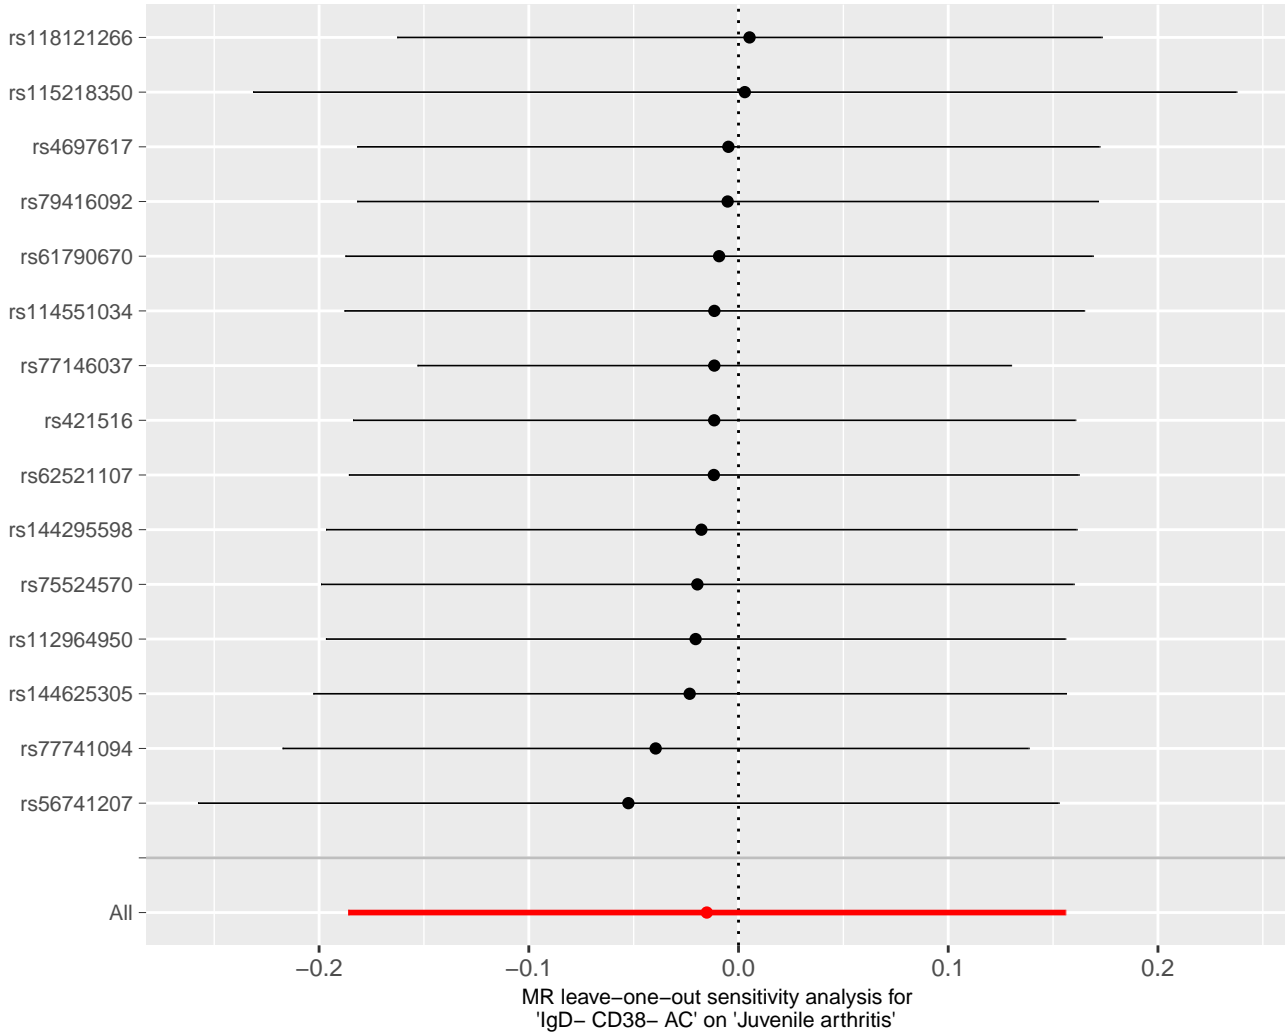



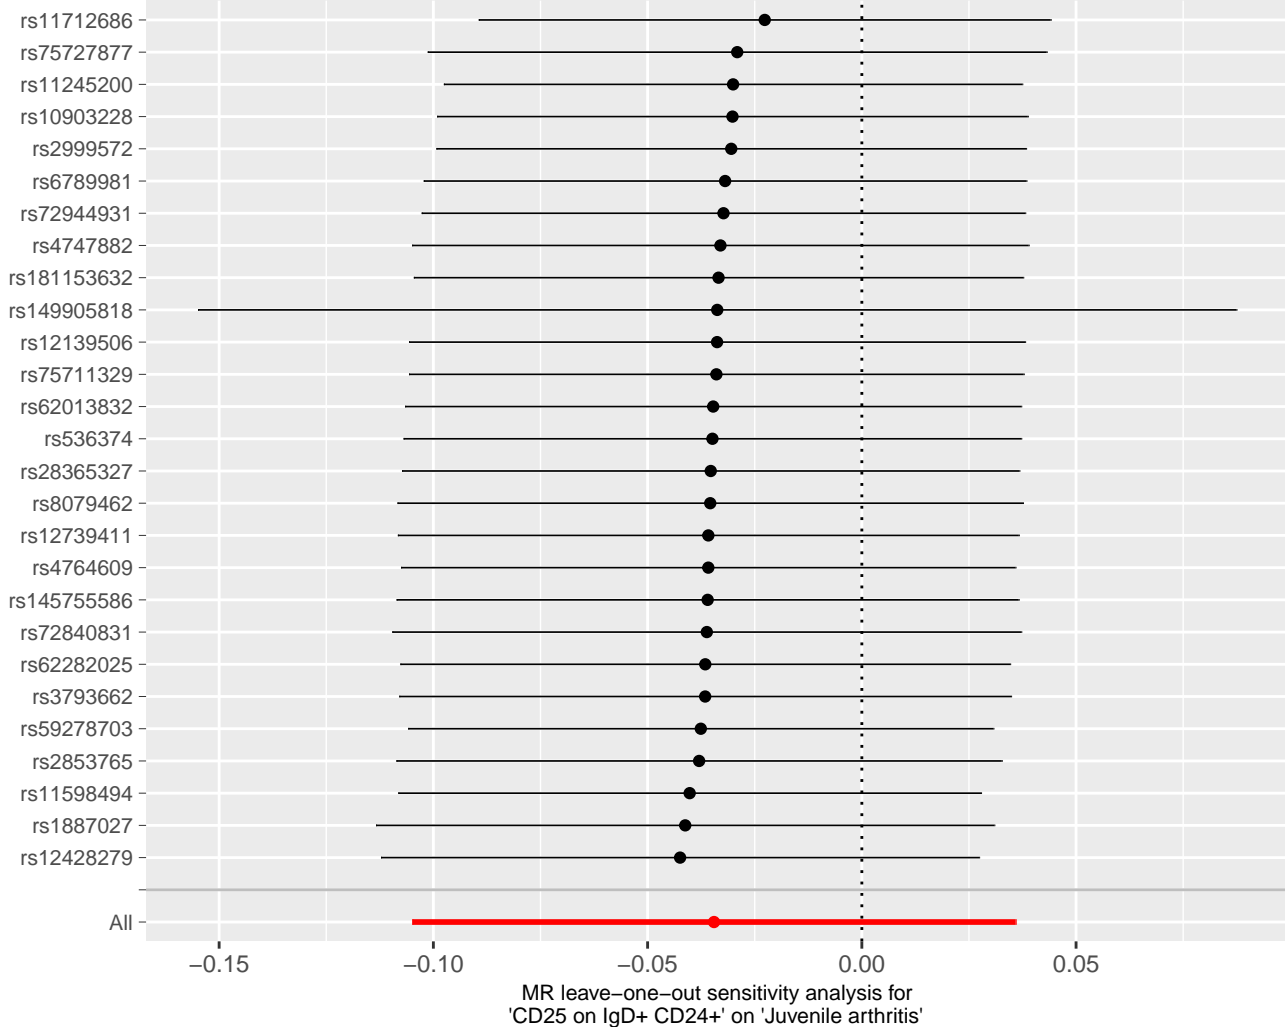

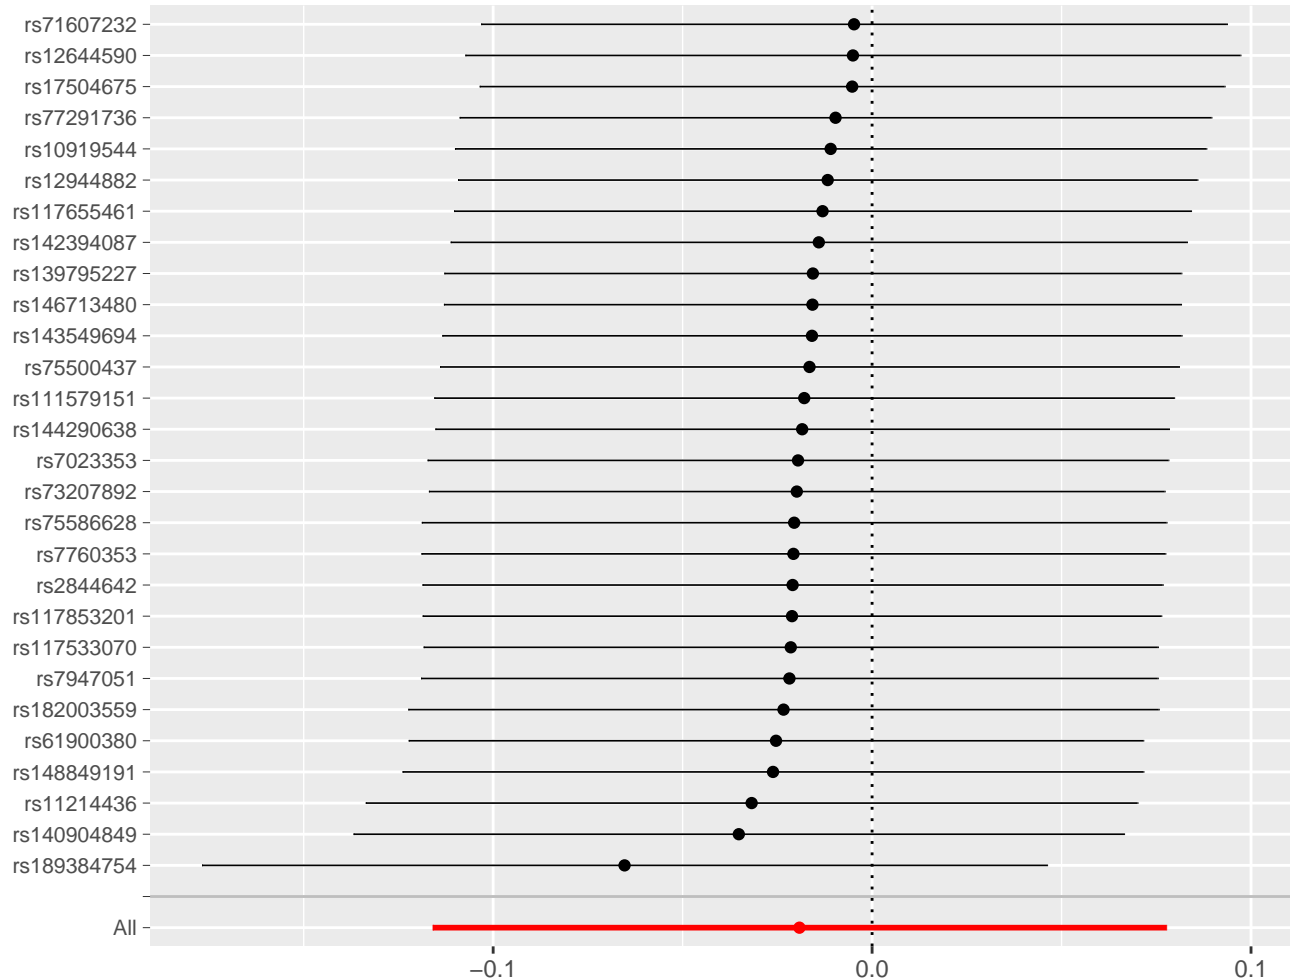

MR leave-one-out sensitivity analysis for 'CD16-CD56 on NK' on 'Juvenile arthritis'

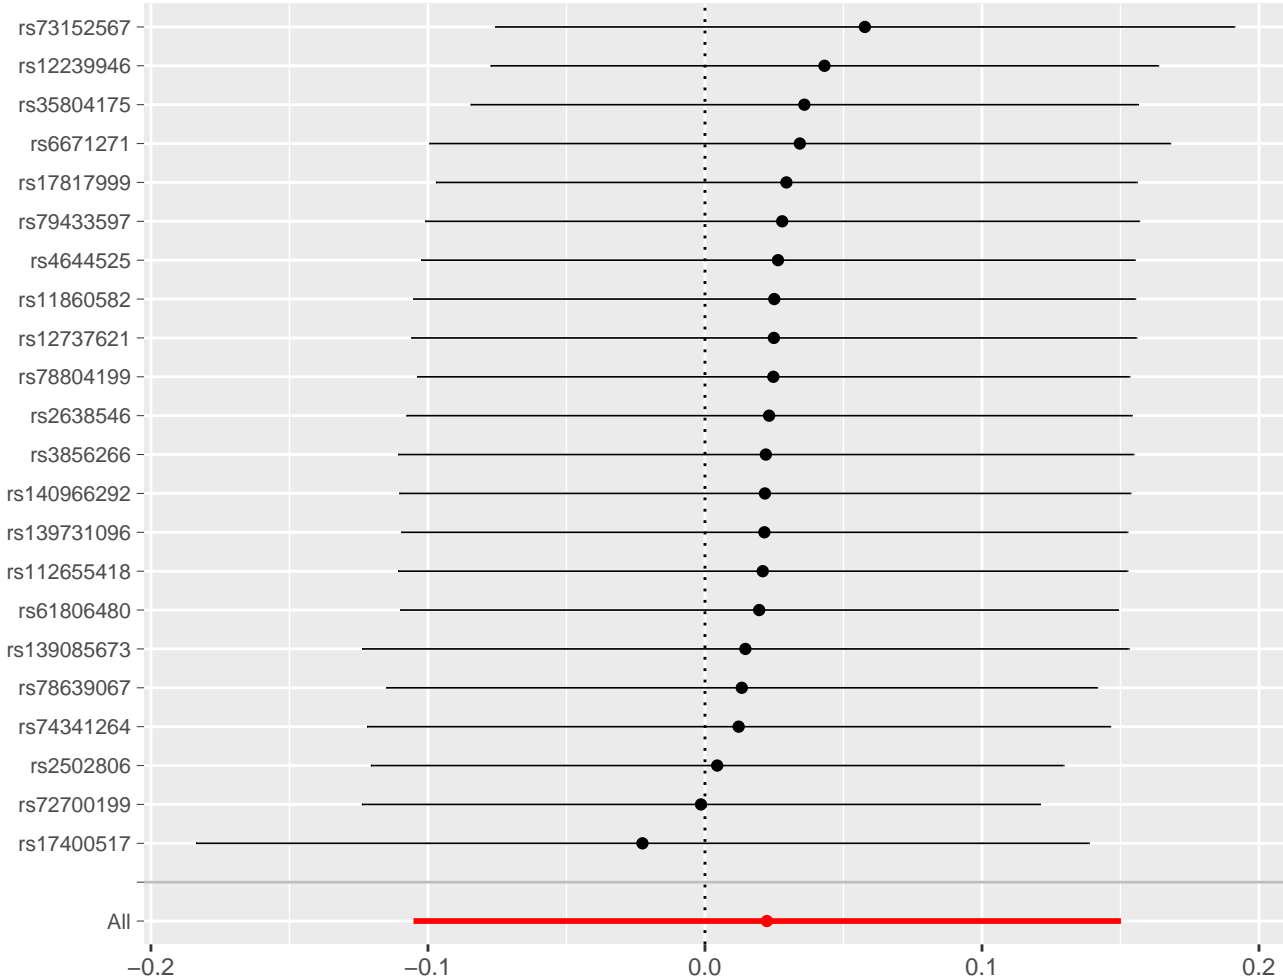

MR leave-one-out sensitivity analysis for 'CD16 on CD14- CD16+ monocyte' on 'Juvenile arthritis'

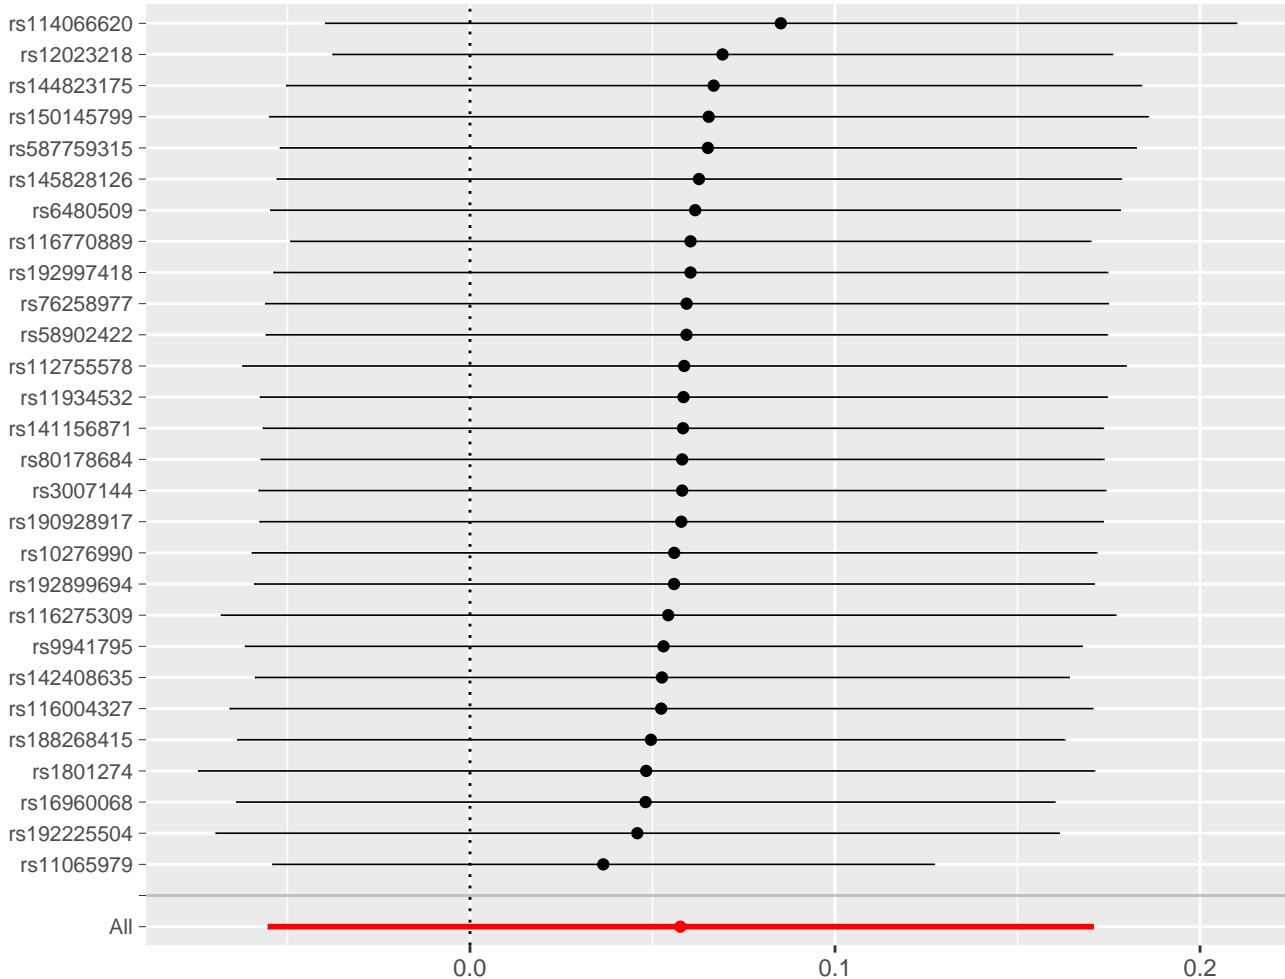

MR leave-one-out sensitivity analysis for 'CD64 on monocyte' on 'Juvenile arthritis'

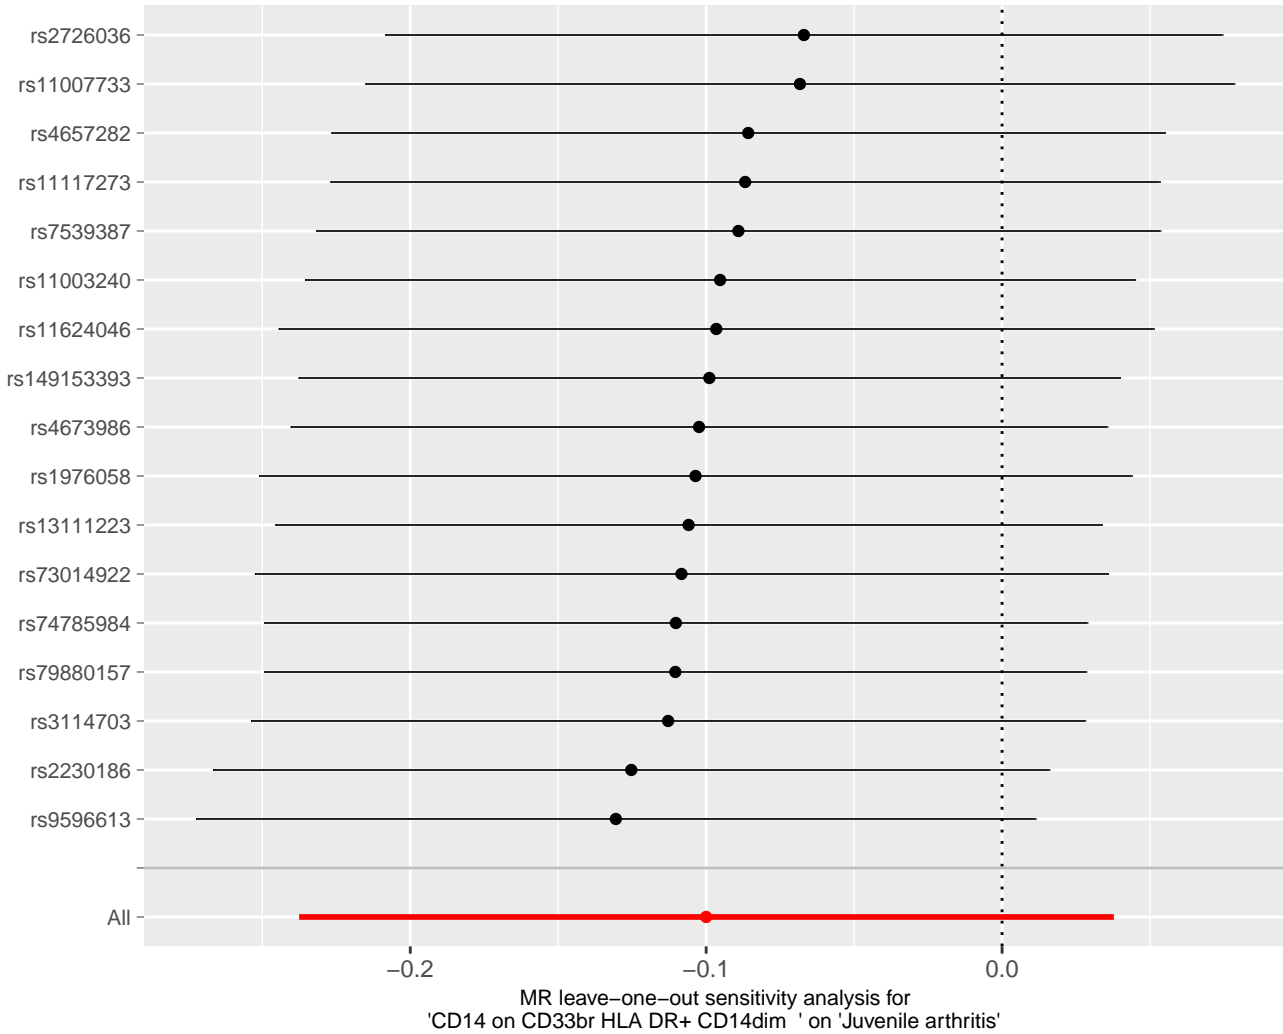

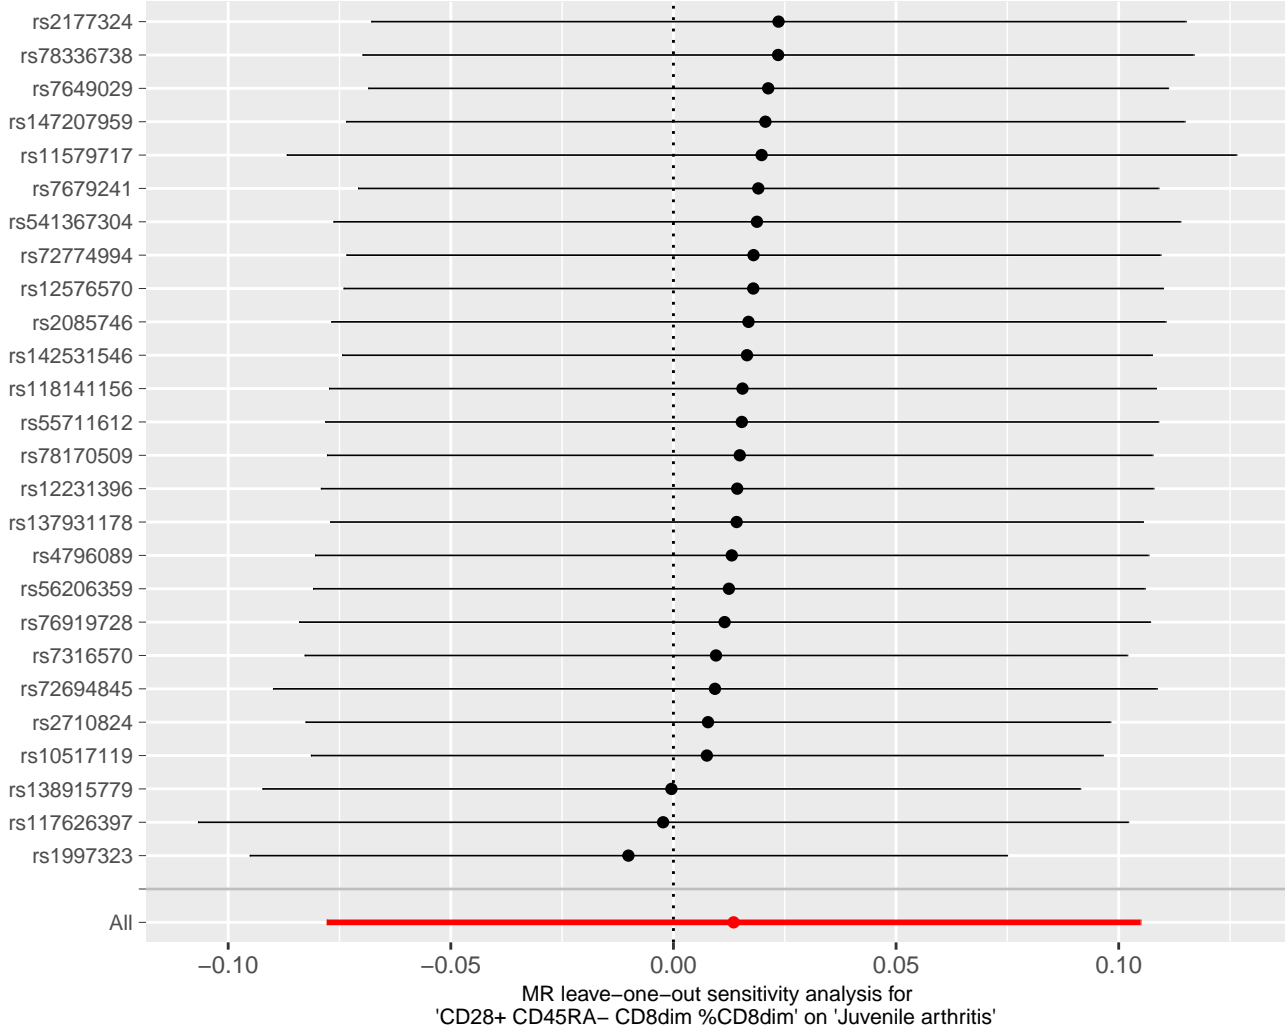

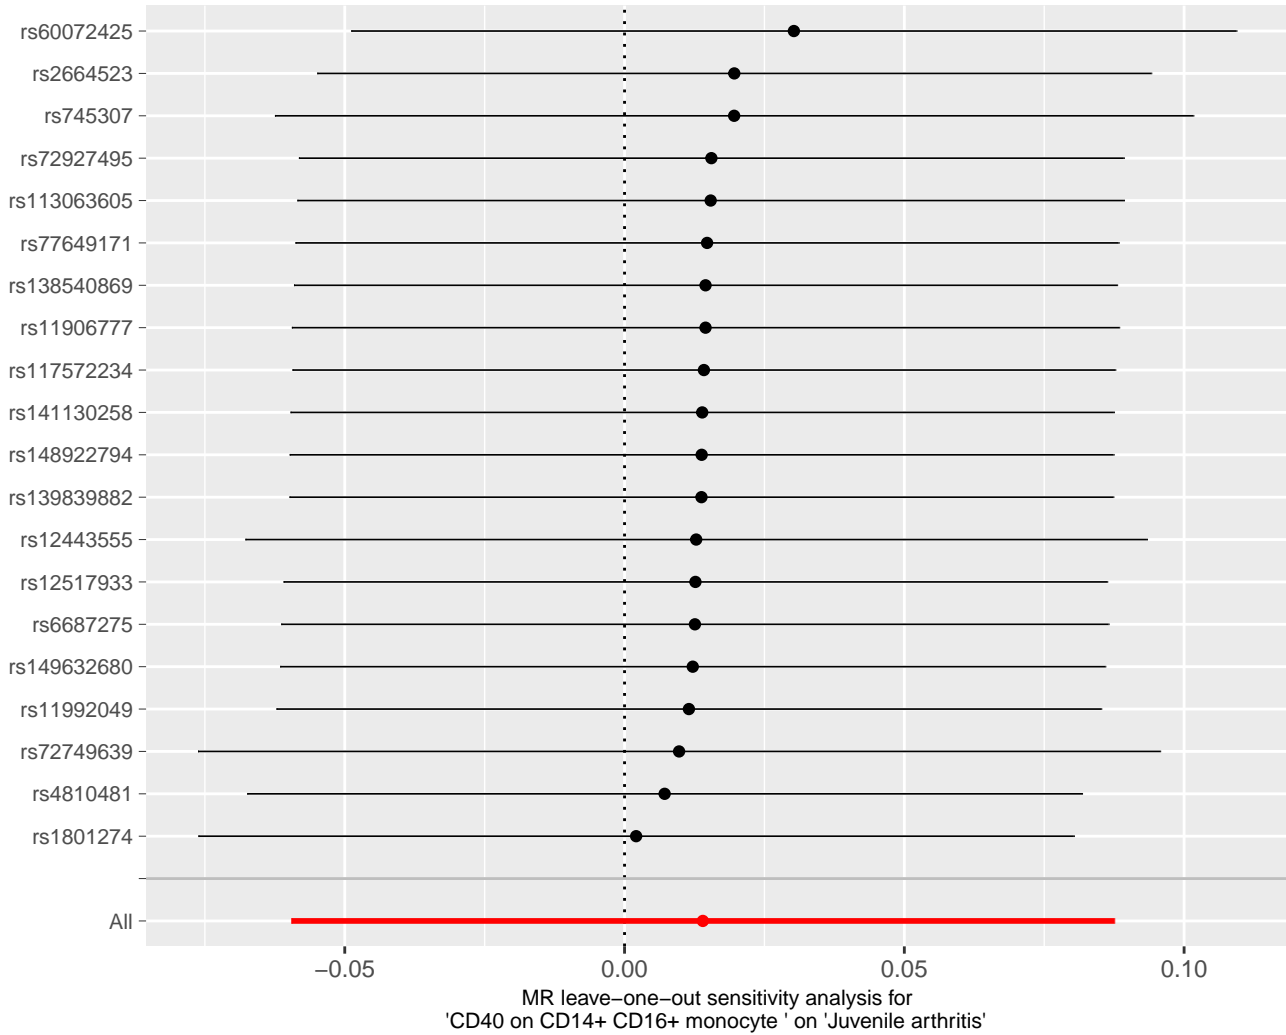

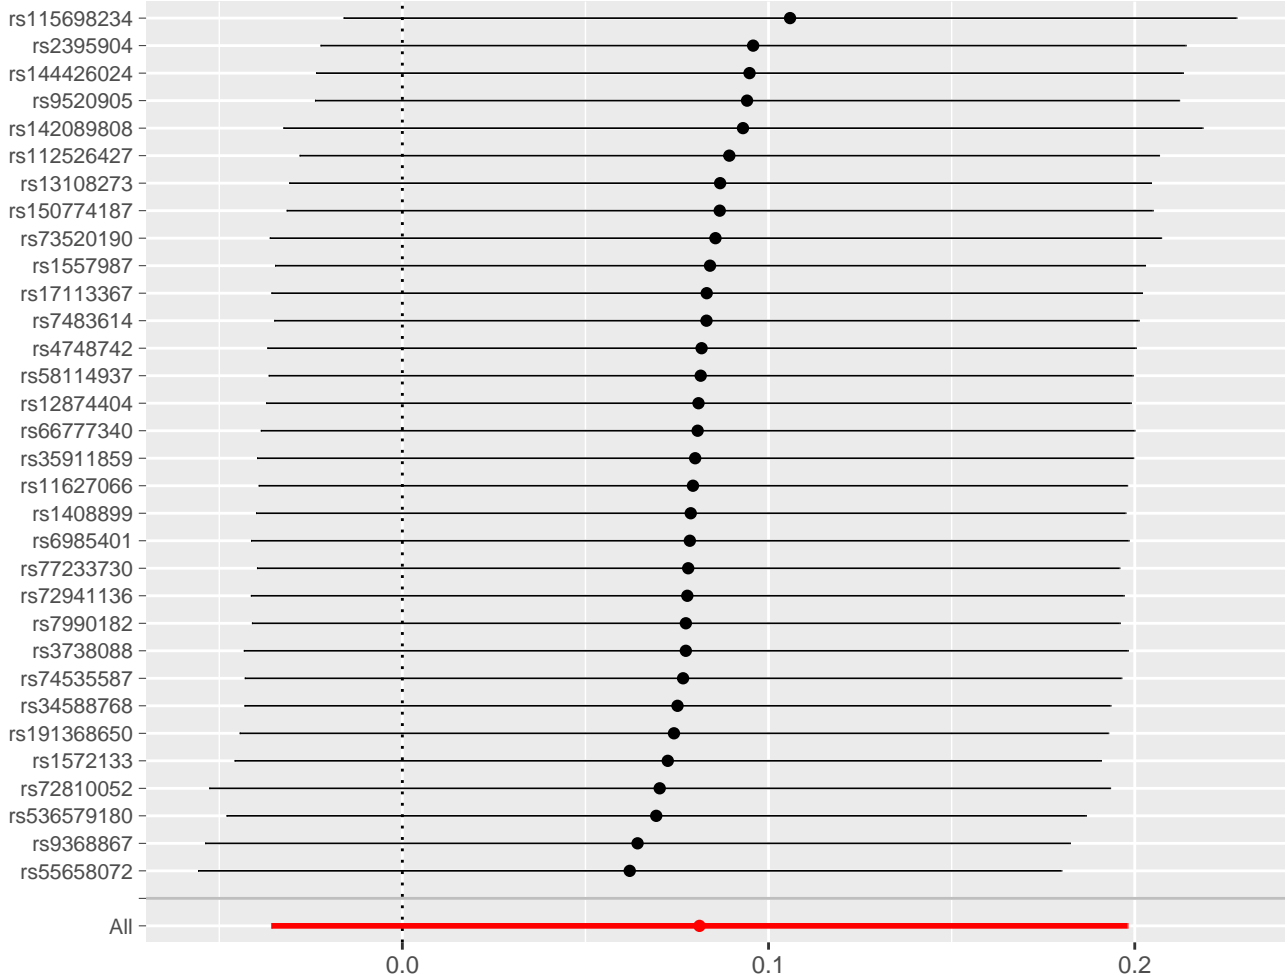

MR leave-one-out sensitivity analysis for 'B cell %lymphocyte' on 'Juvenile arthritis'



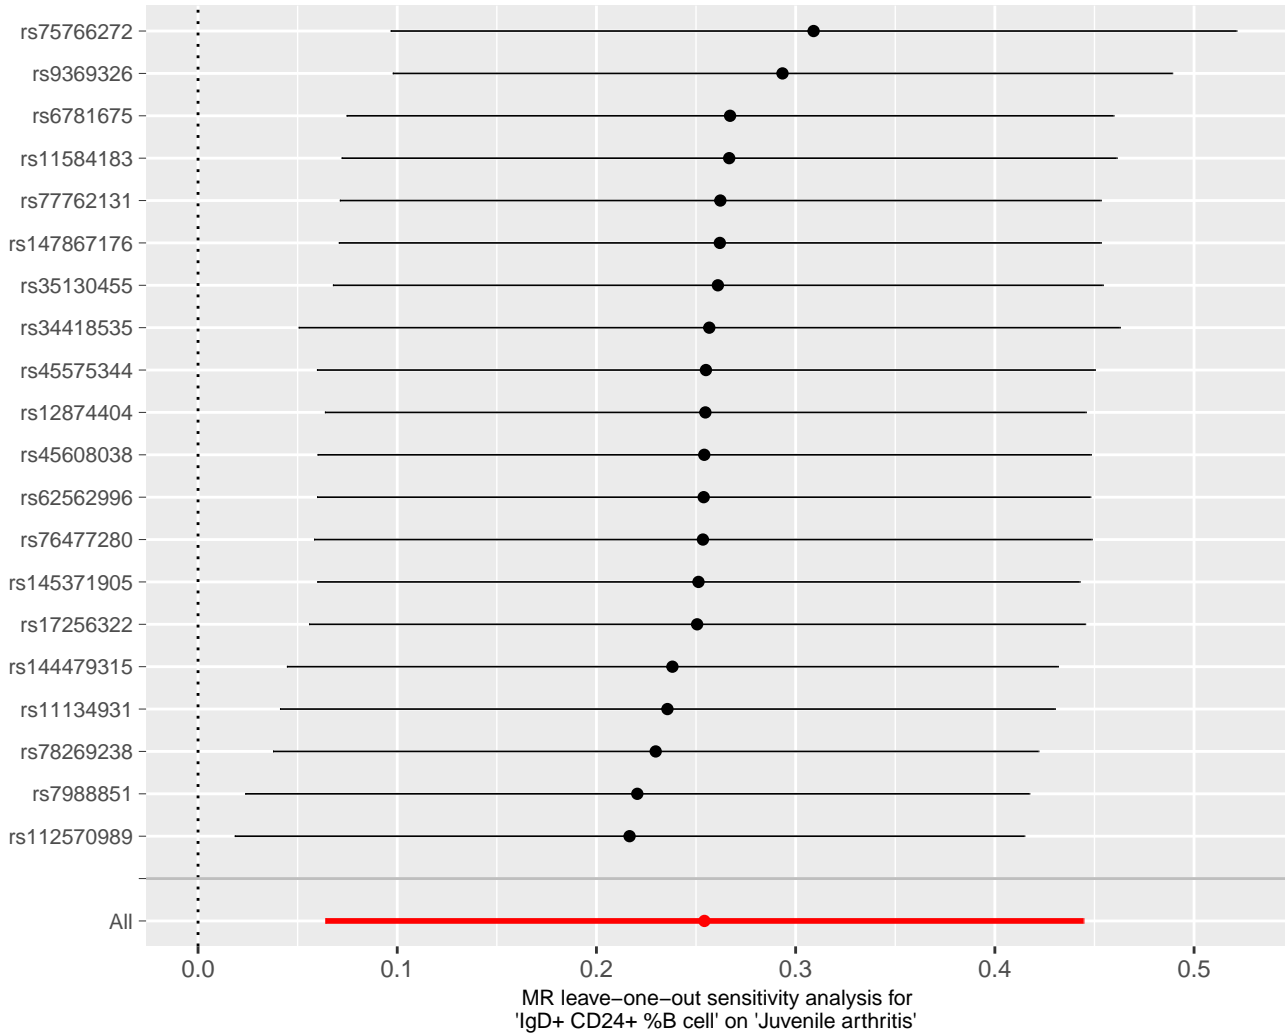

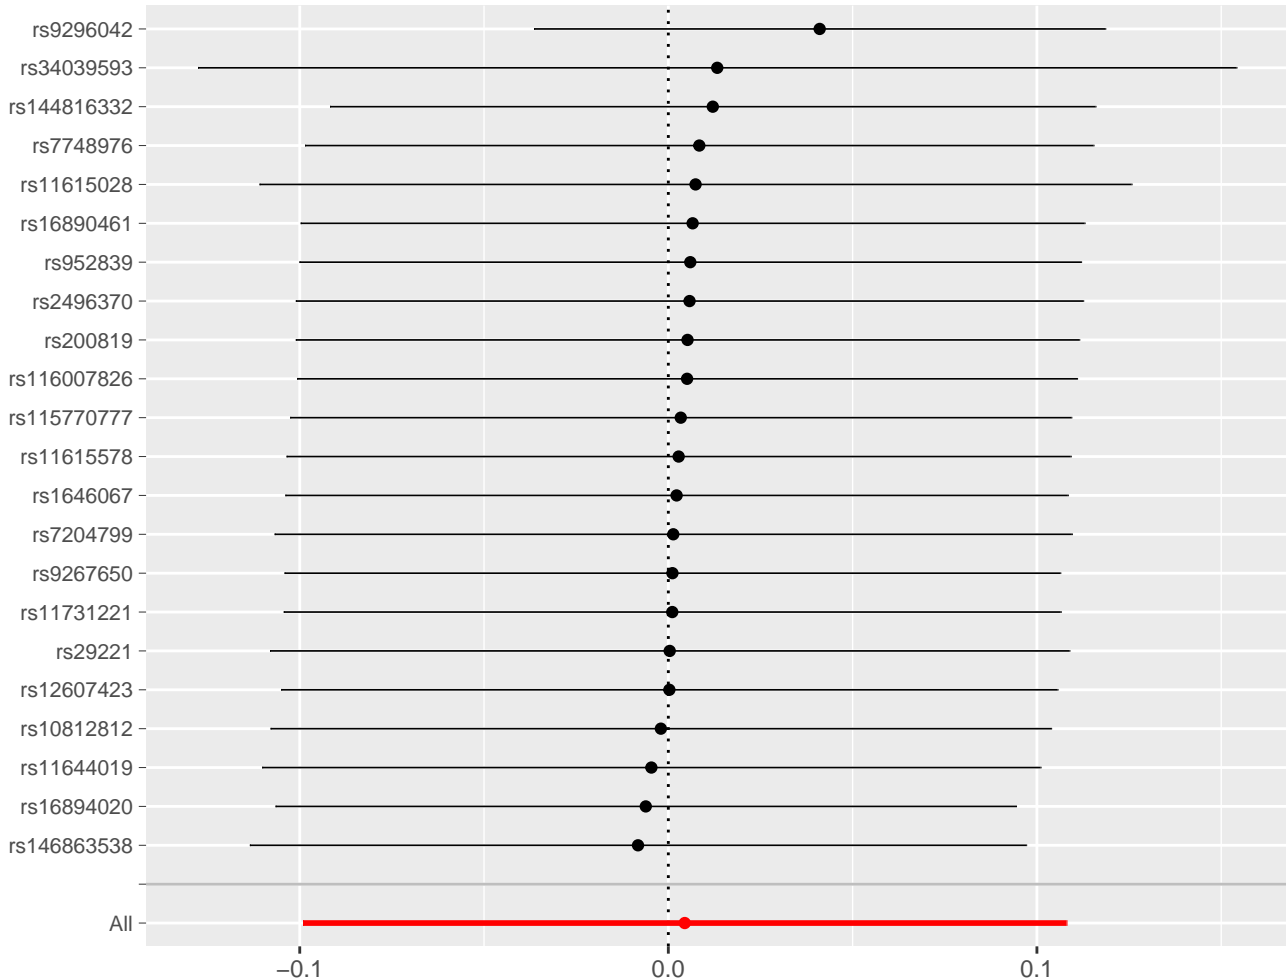

MR leave-one-out sensitivity analysis for 'HLA DR on plasmacytoid DC' on 'Juvenile arthritis'

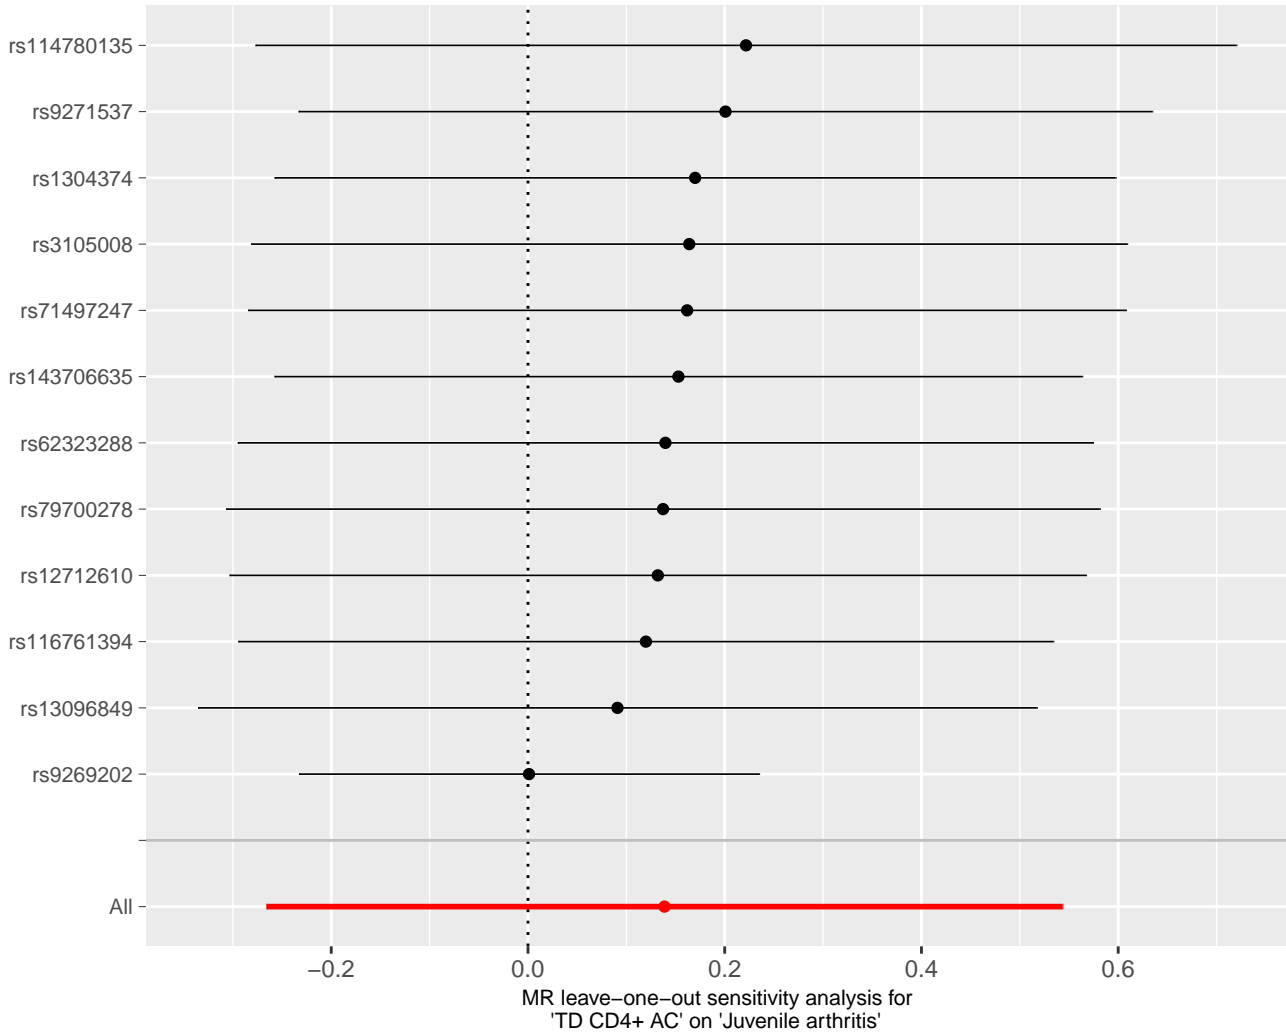

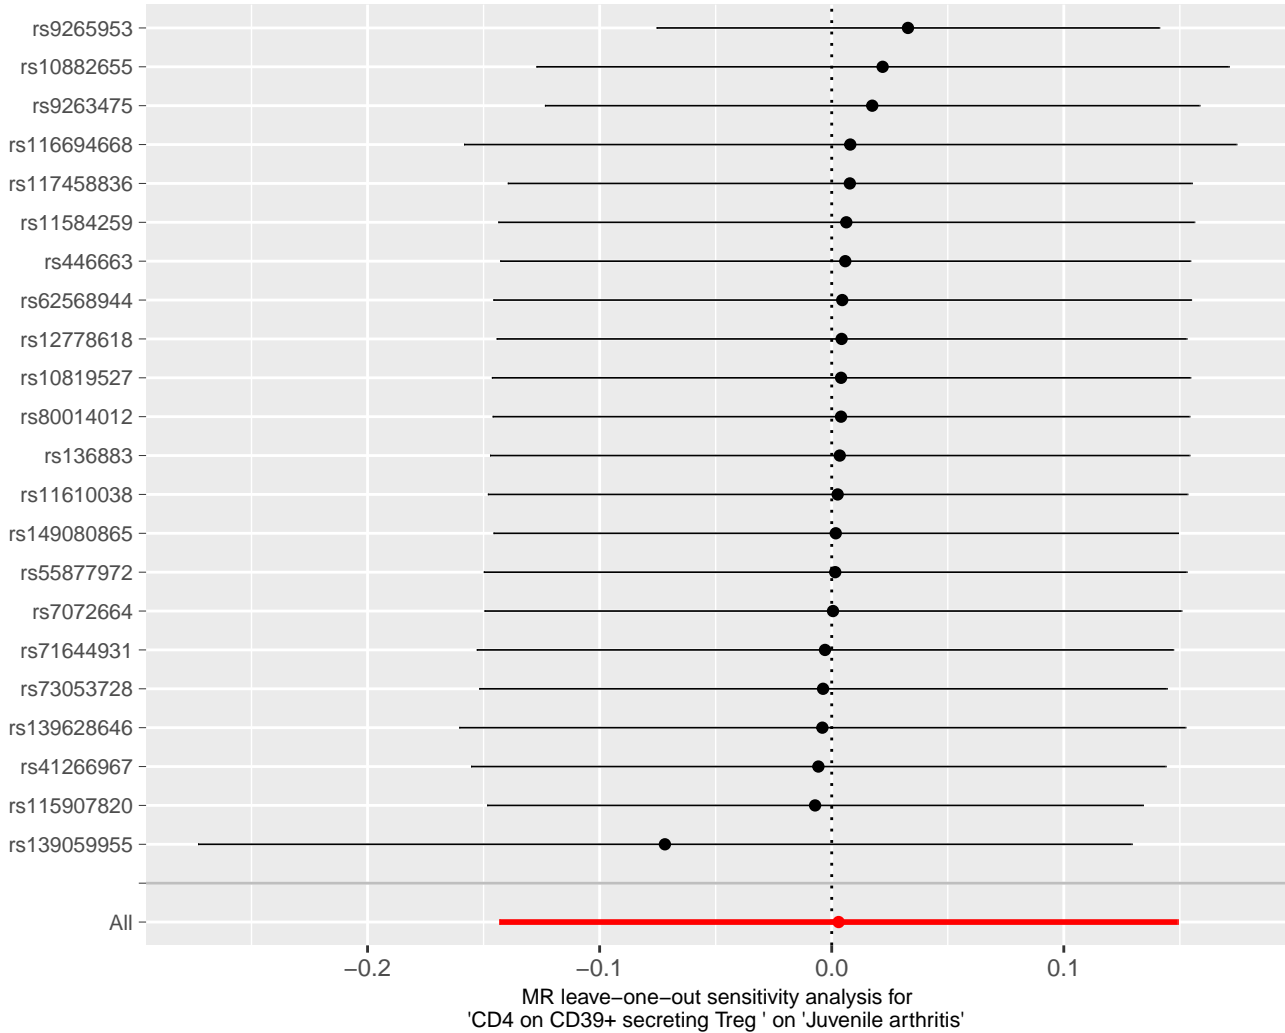

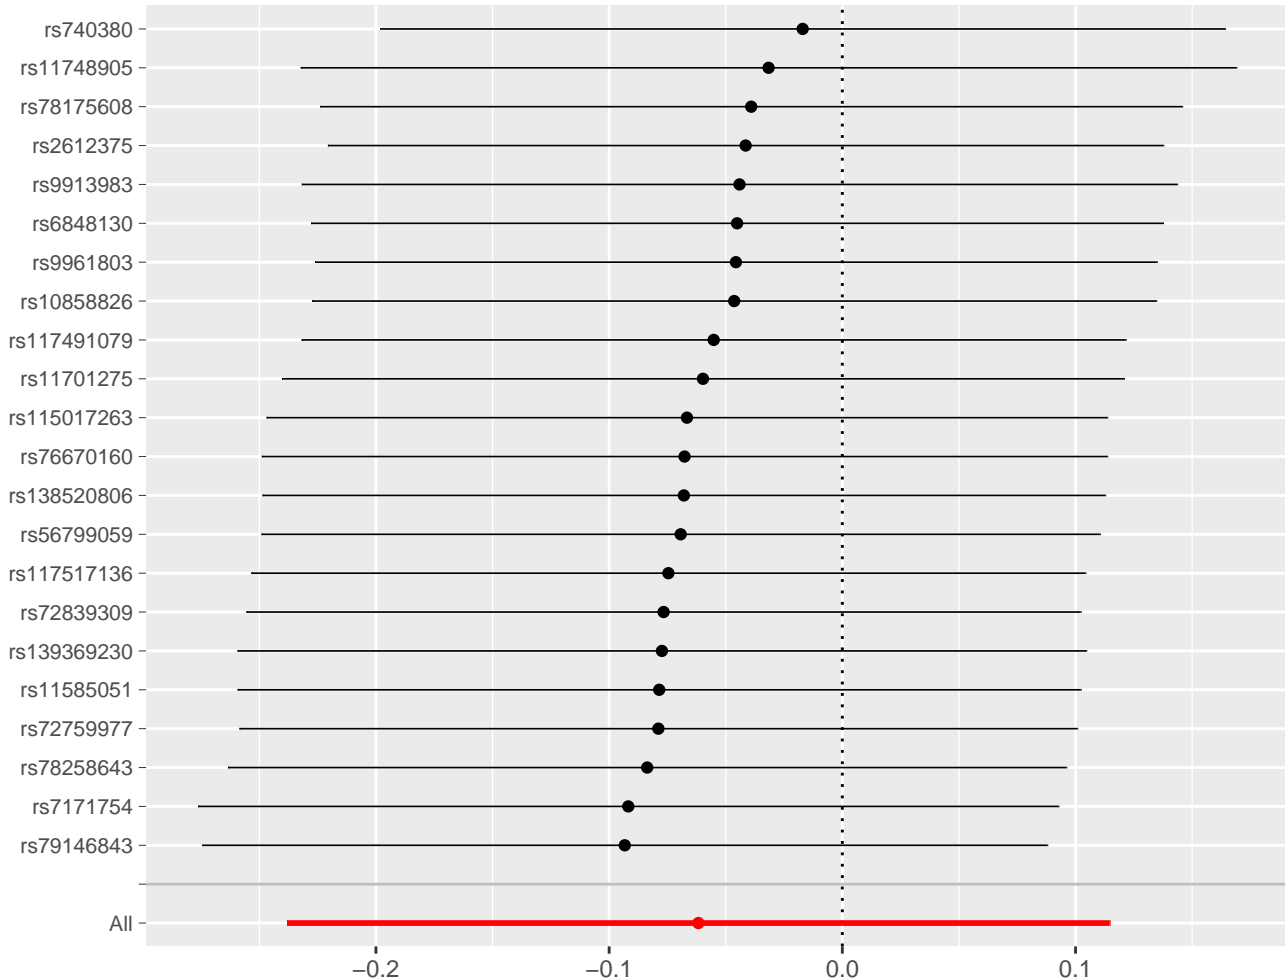

MR leave-one-out sensitivity analysis for 'CD19 on PB/PC' on 'Juvenile arthritis'

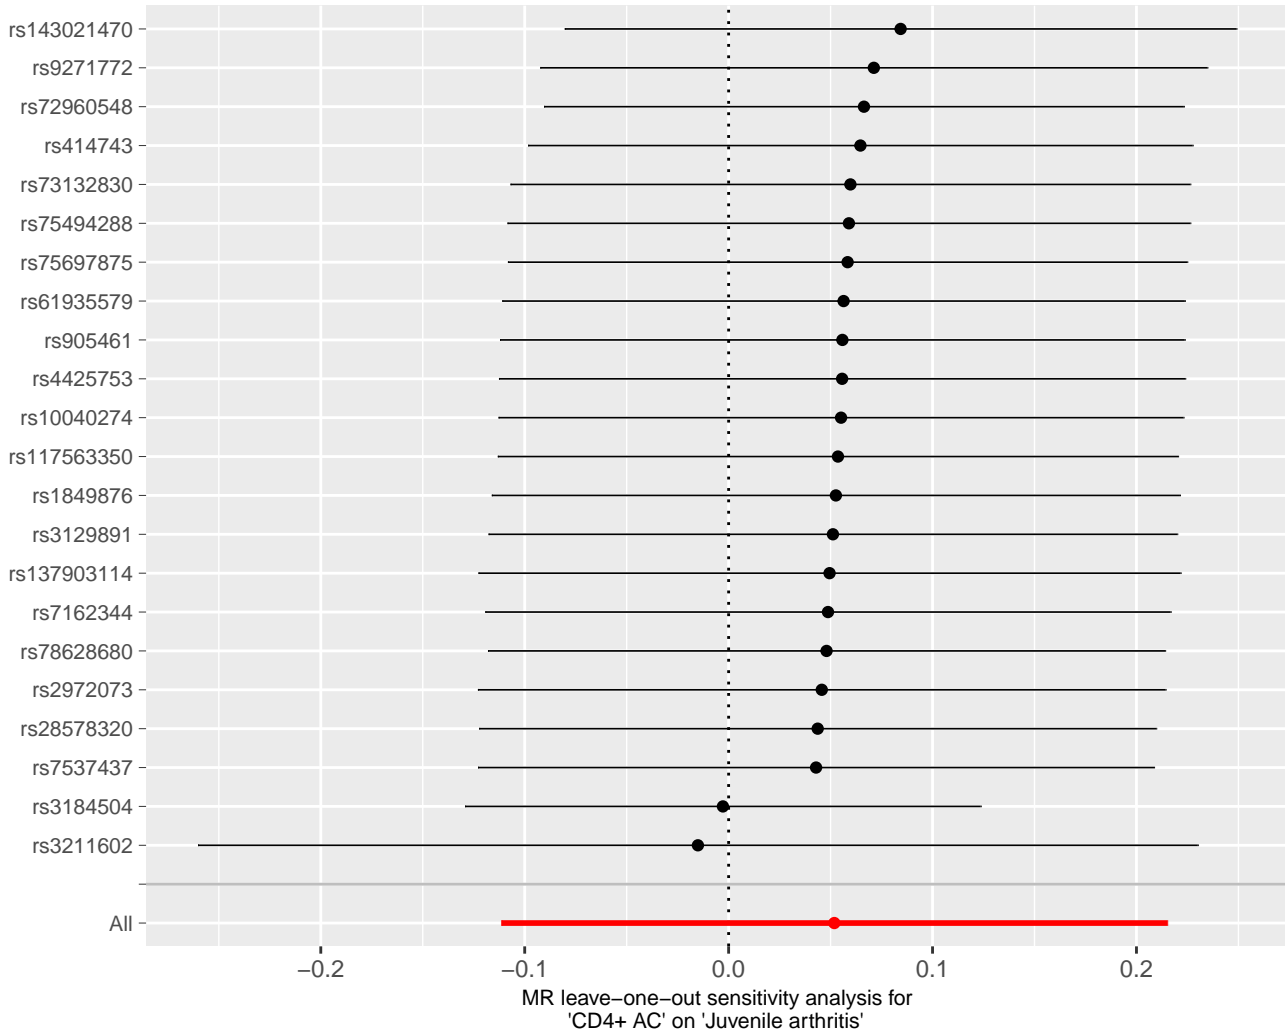

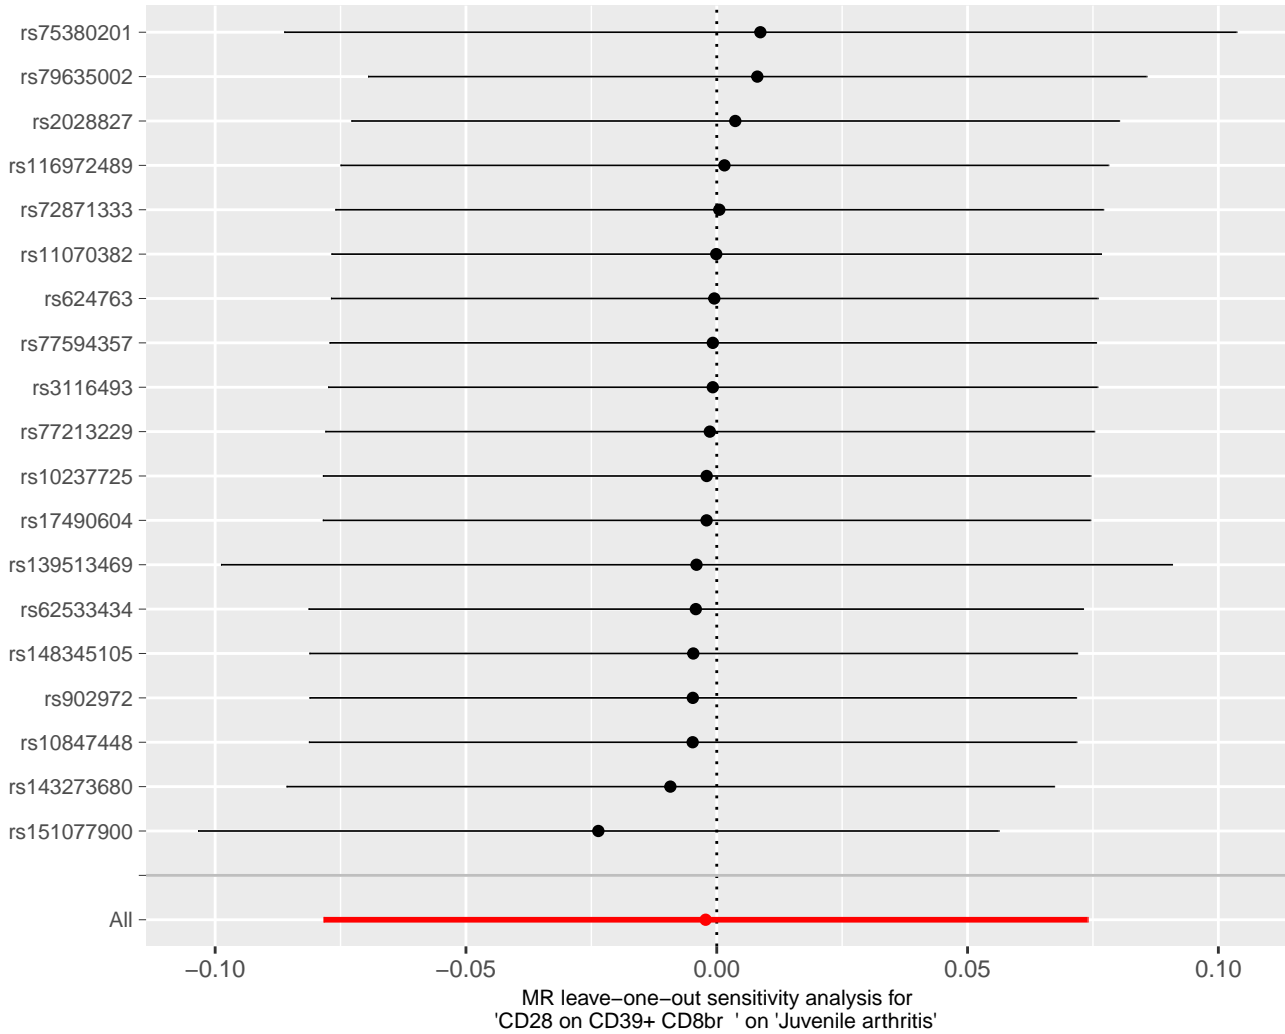

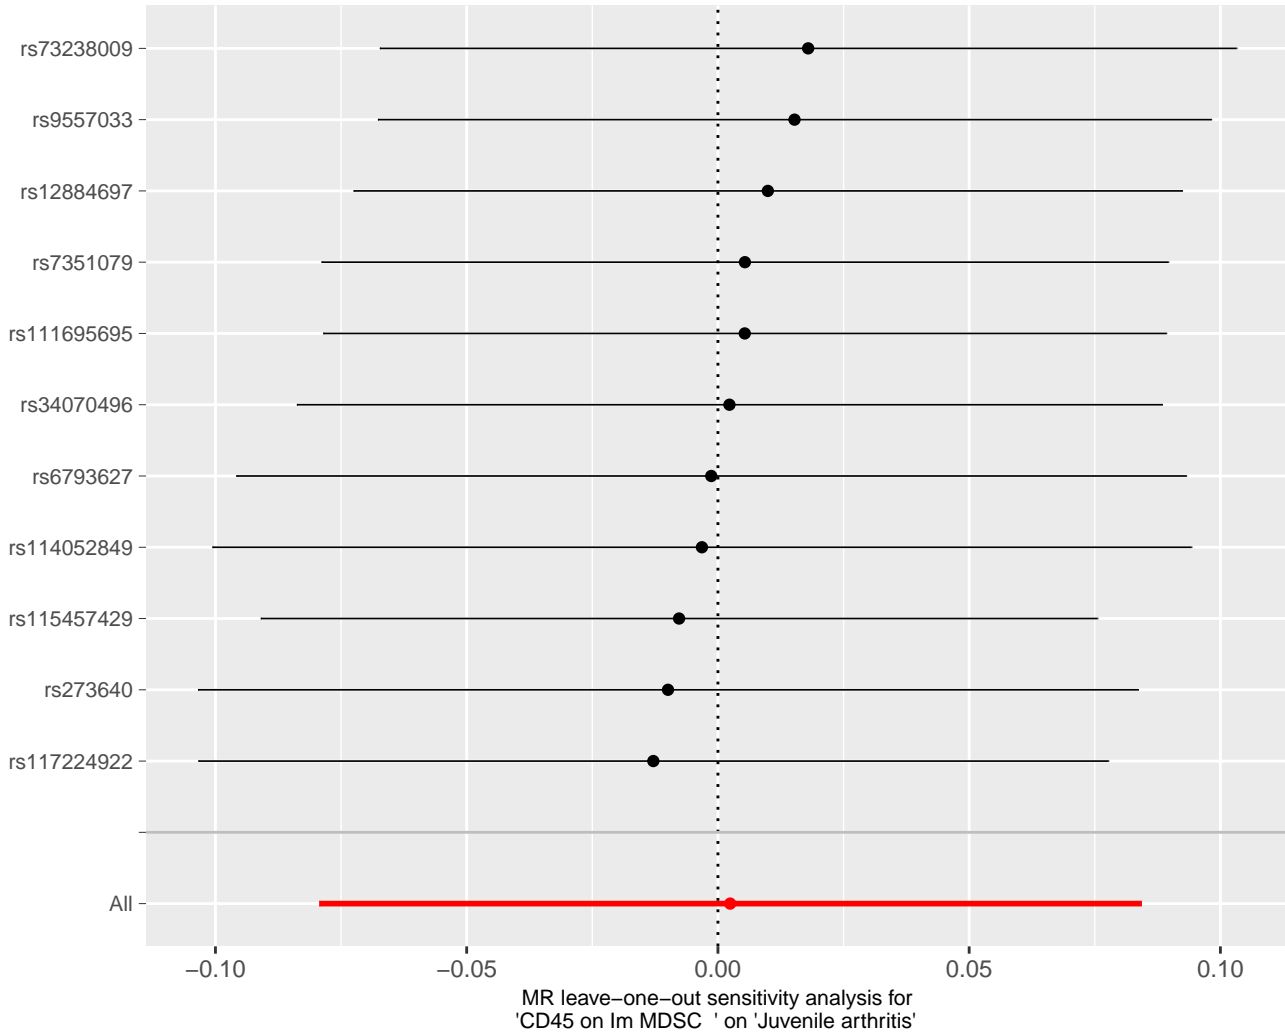



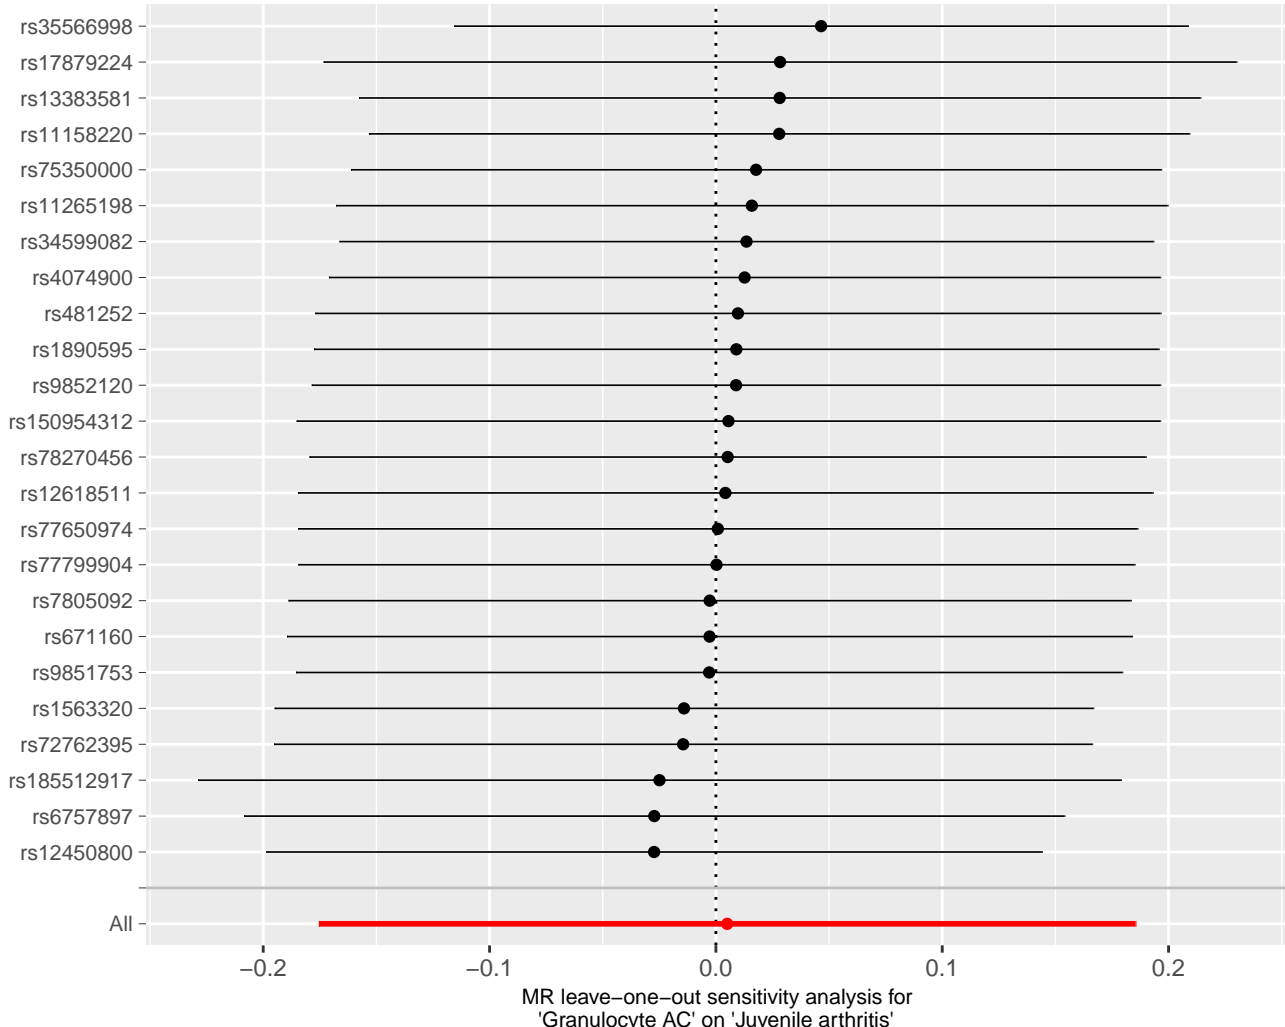

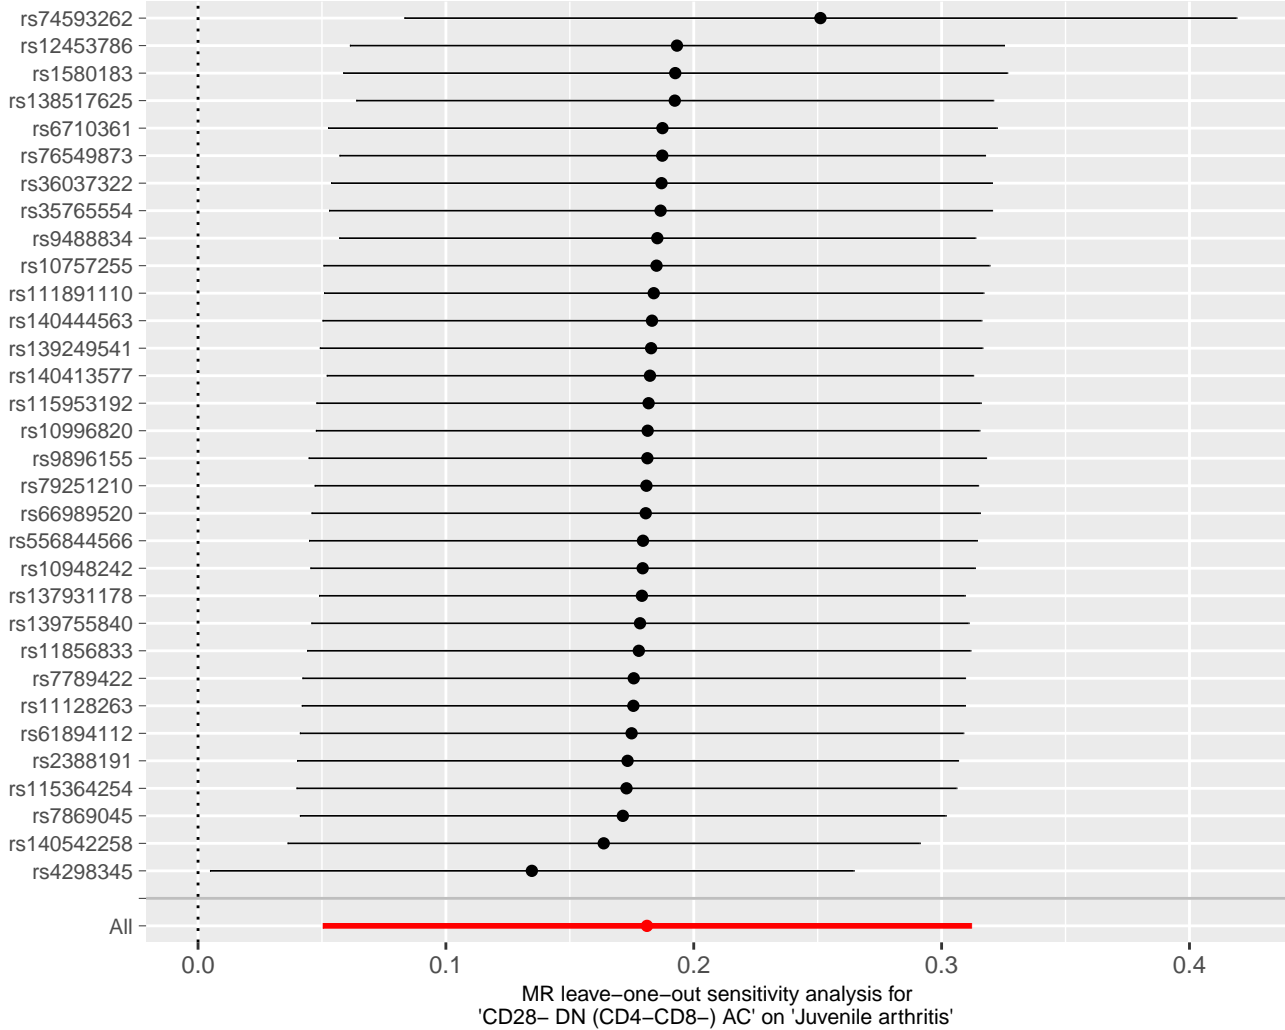

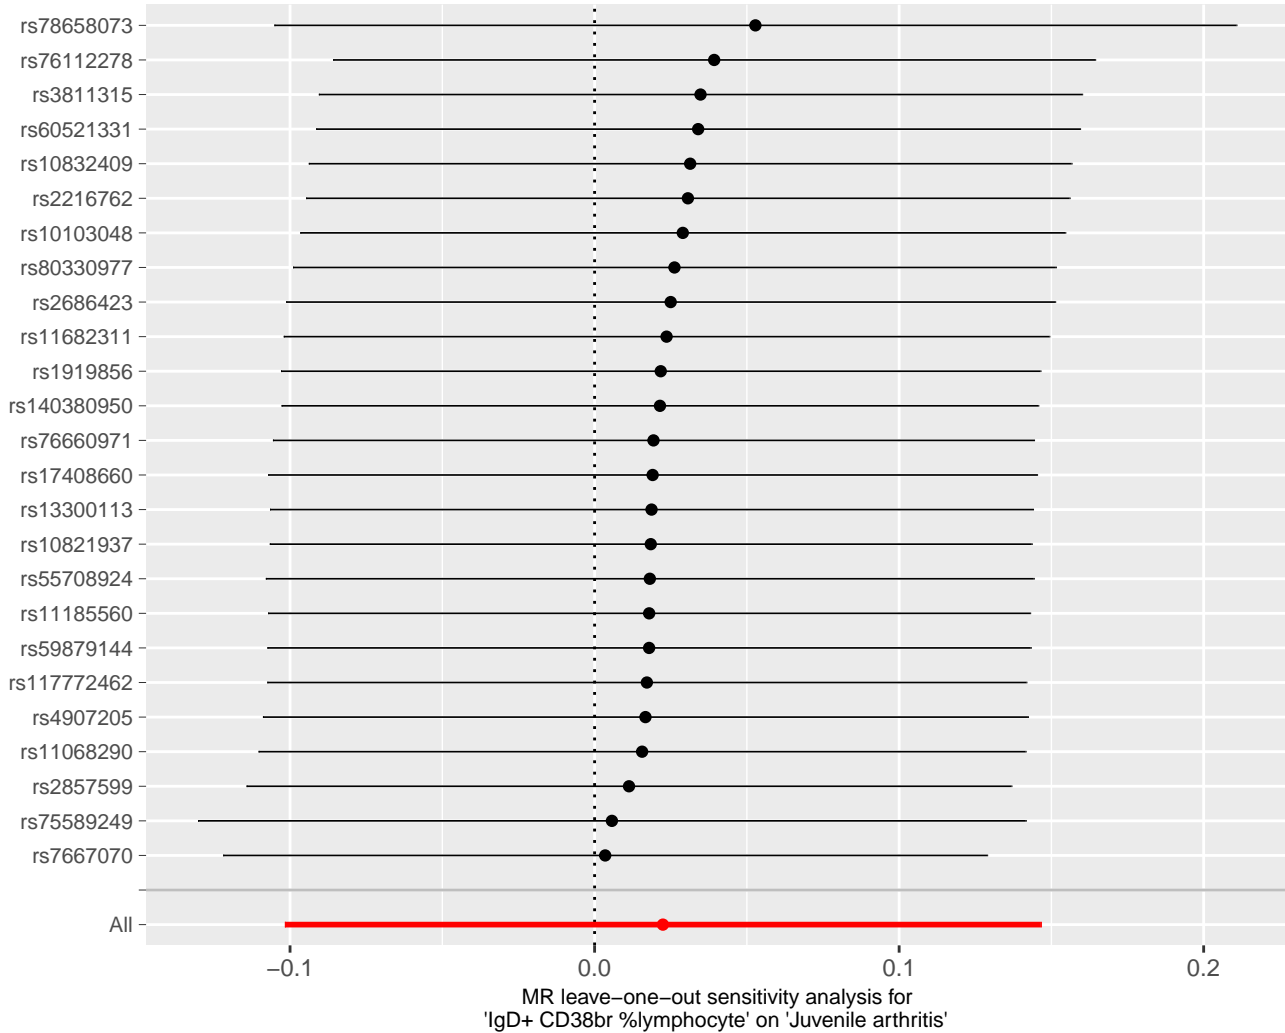

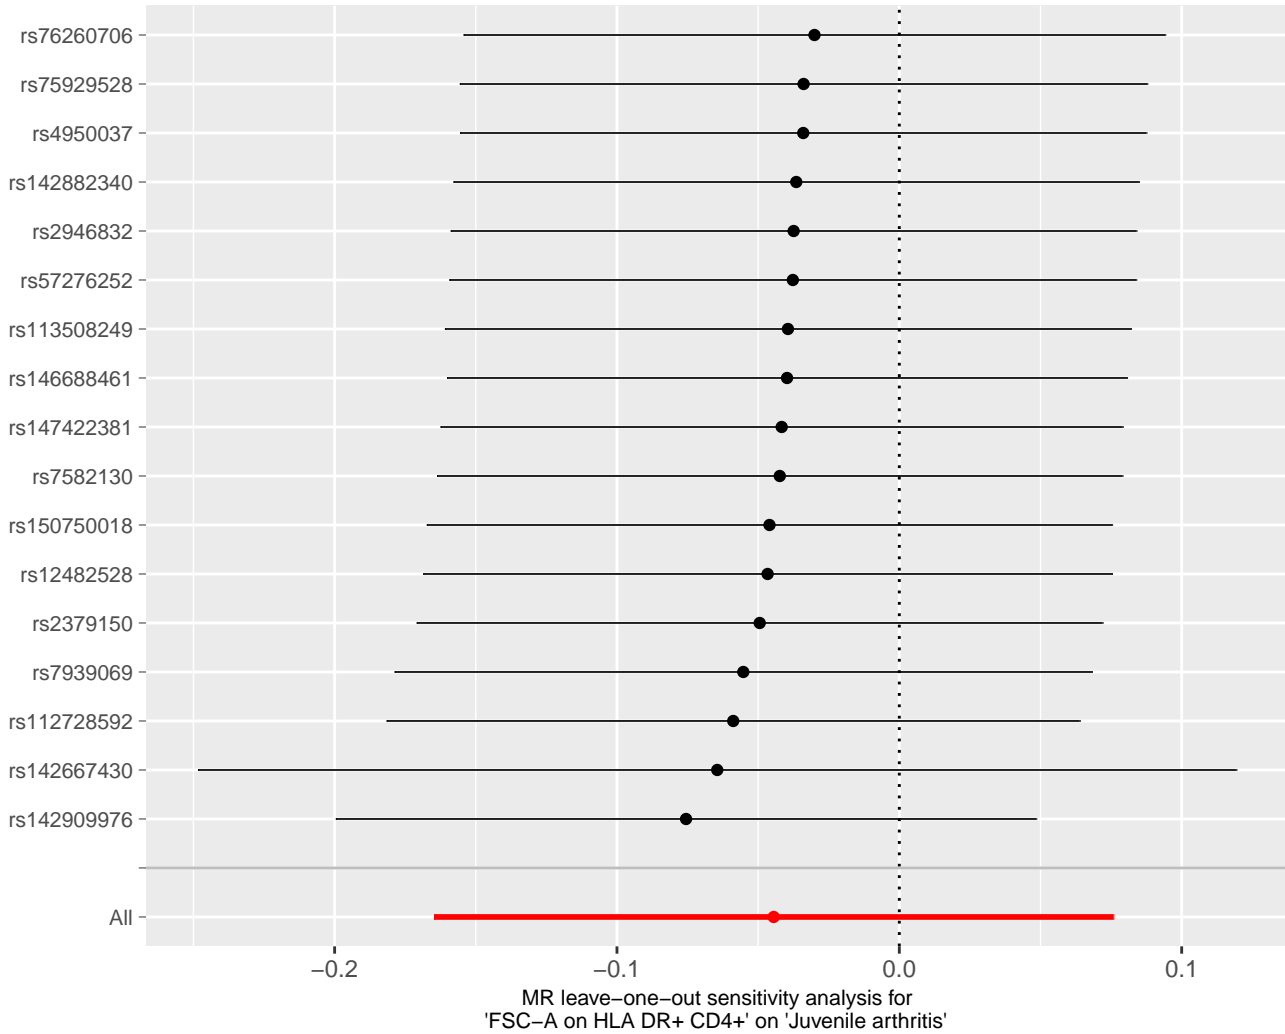

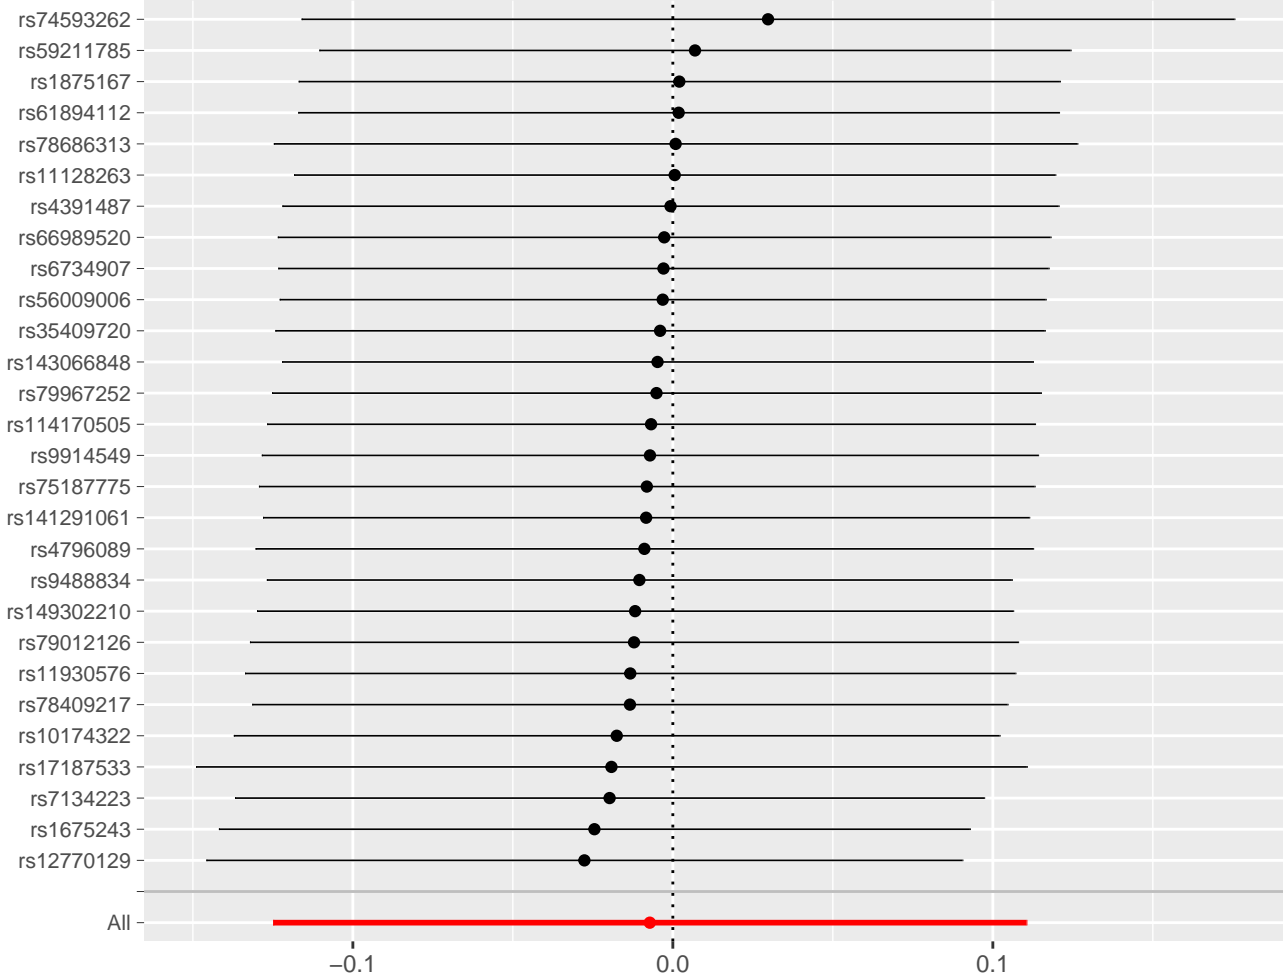

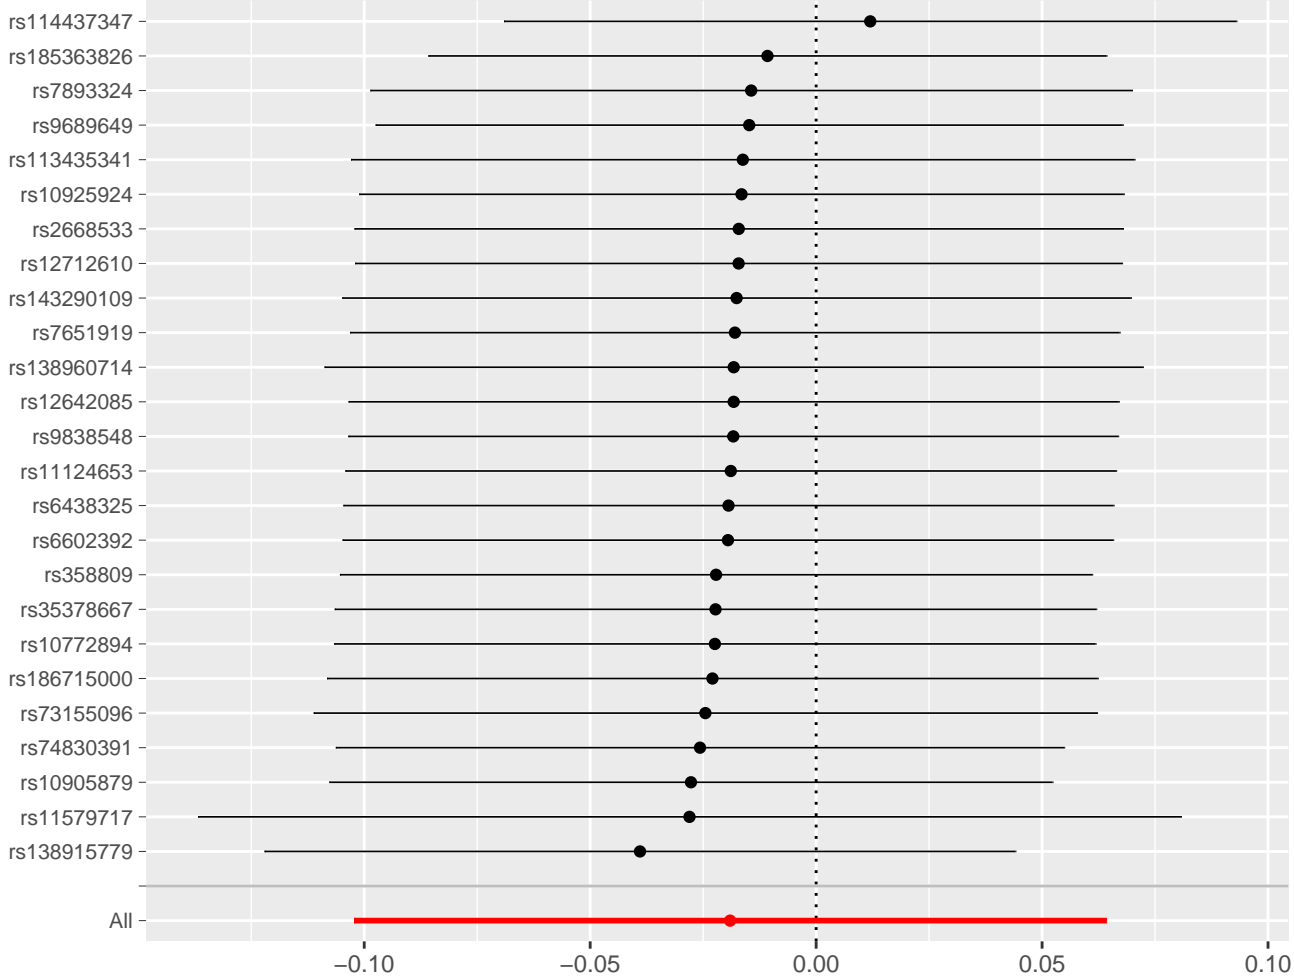

MR leave-one-out sensitivity analysis for 'Secreting Treg %CD4' on 'Juvenile arthritis'

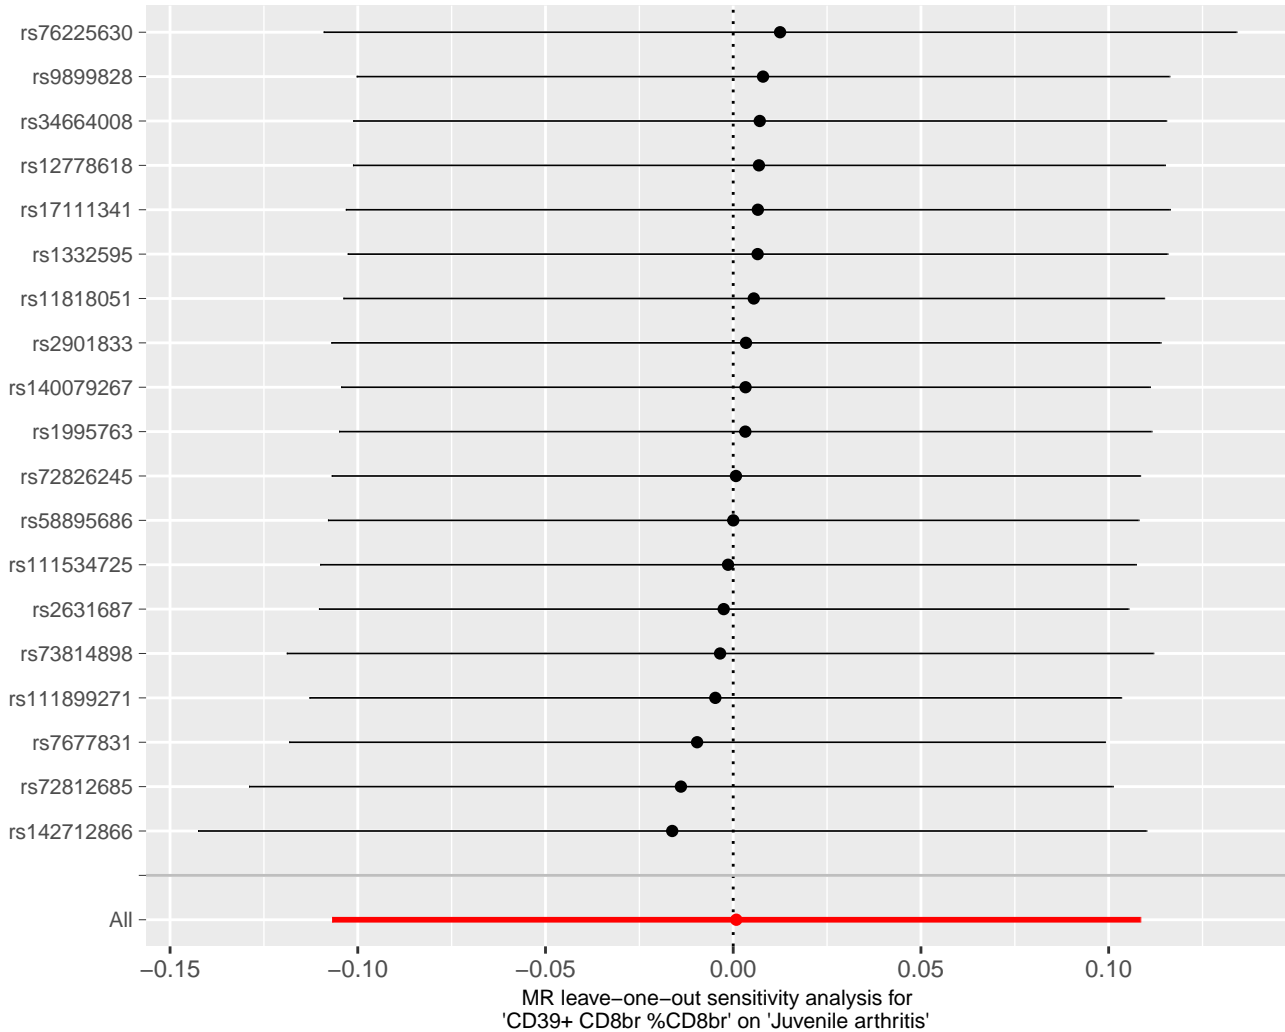

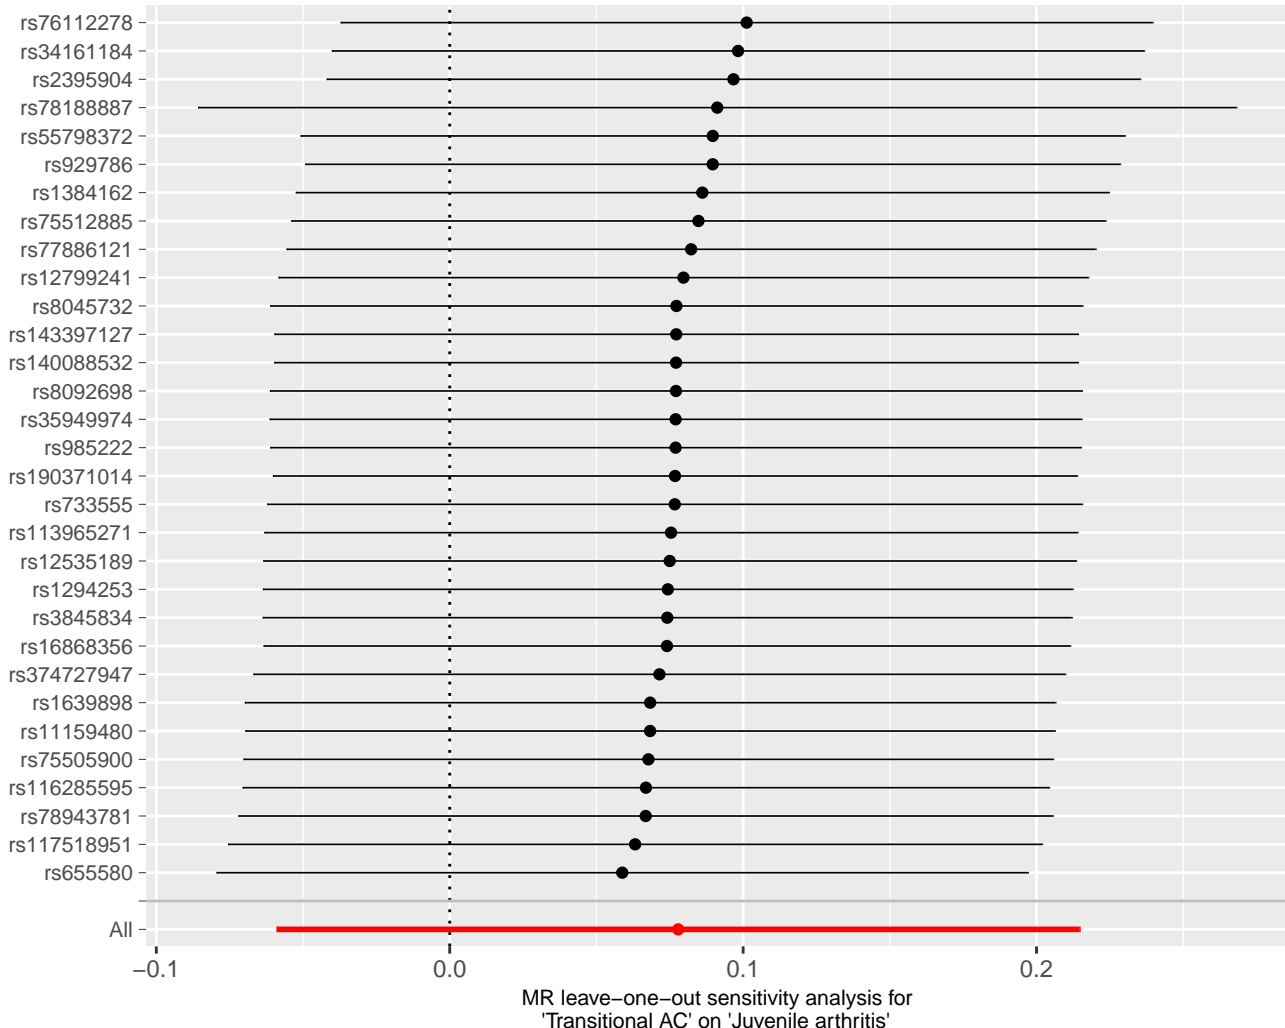



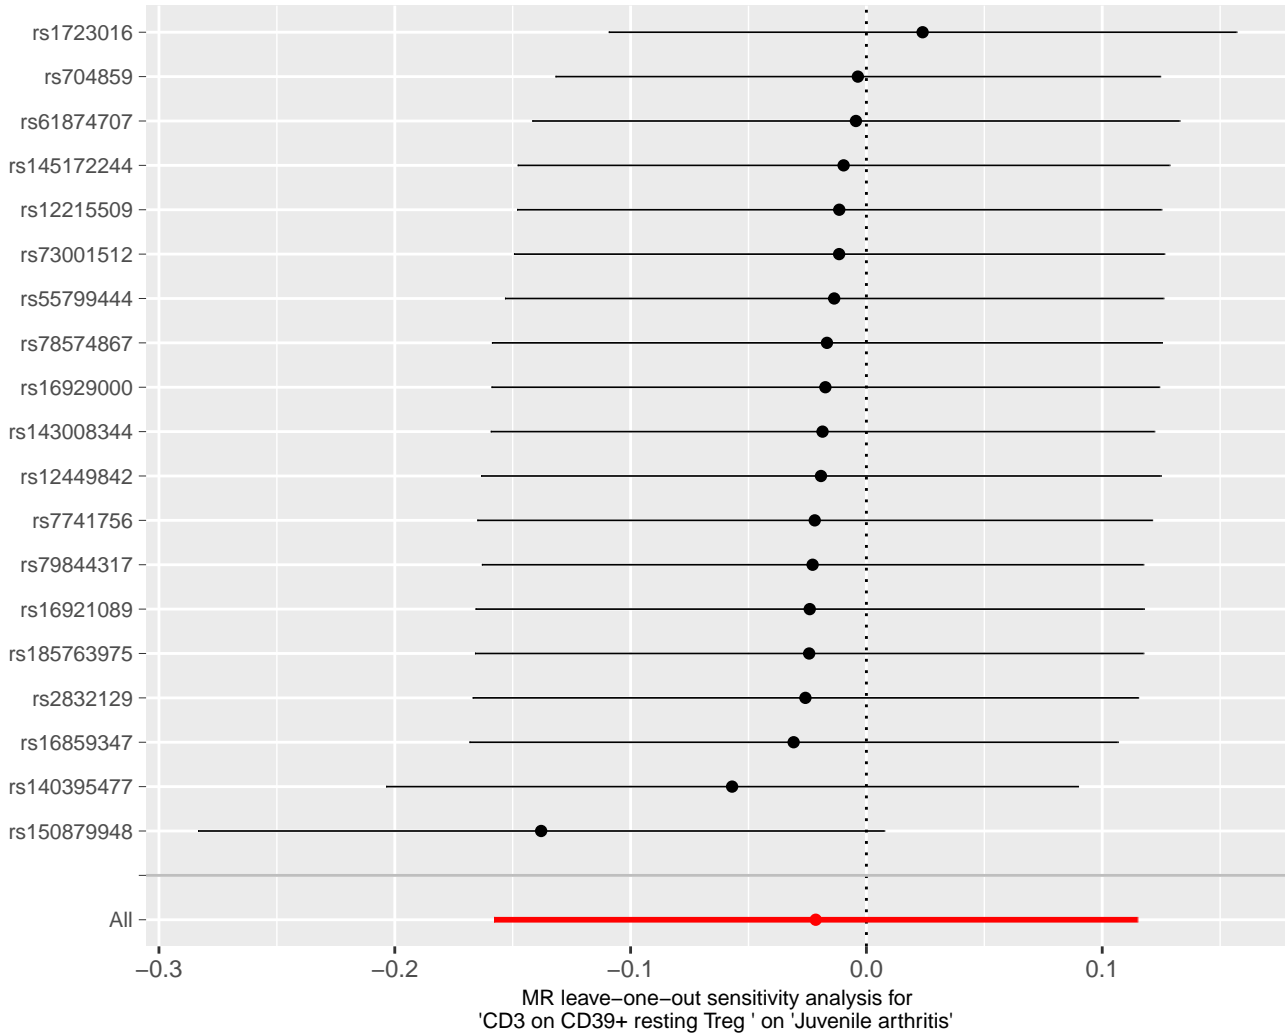

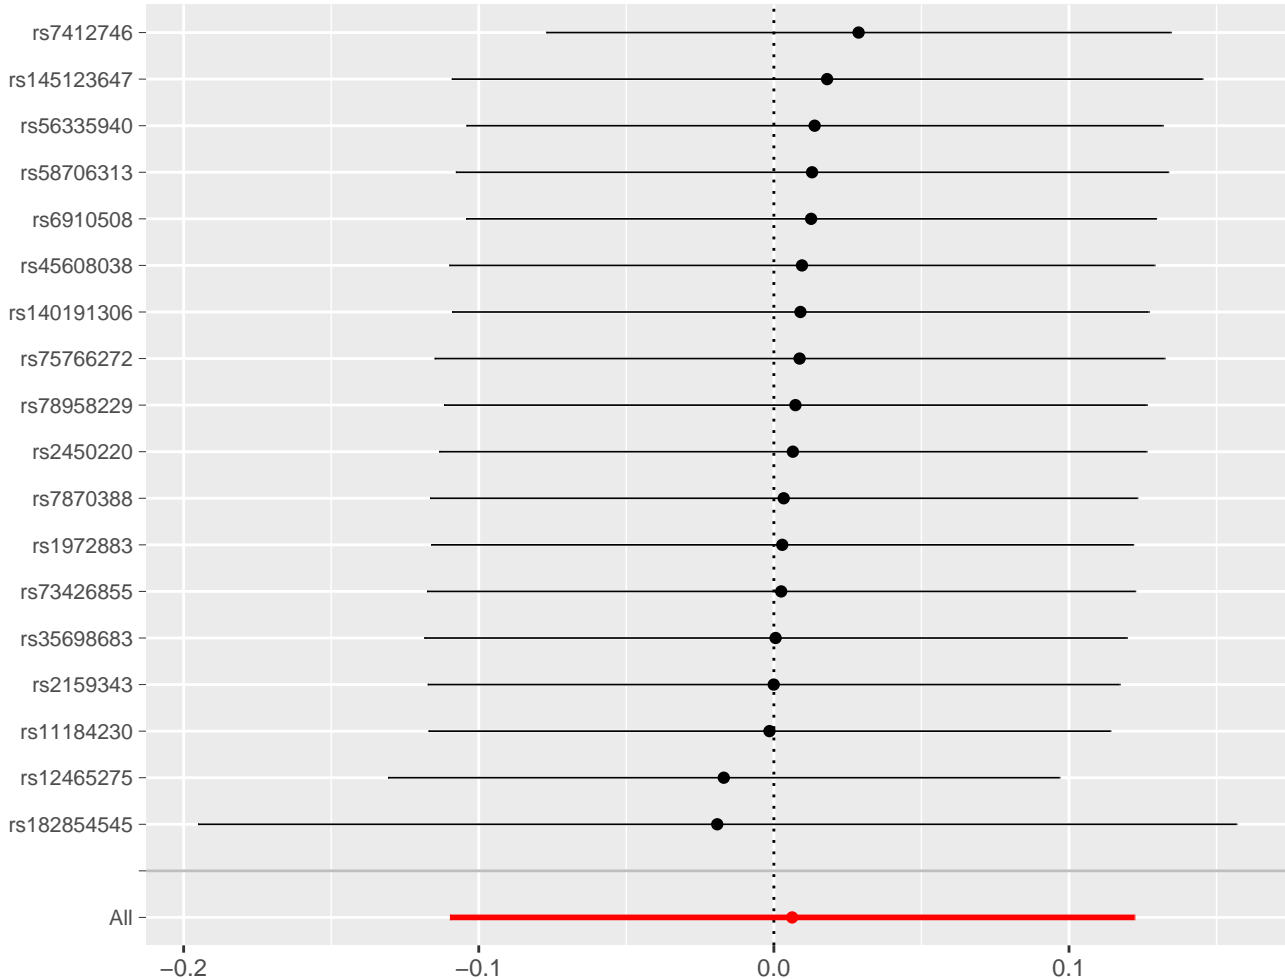

MR leave-one-out sensitivity analysis for 'IgD+ CD24- %B cell' on 'Juvenile arthritis'

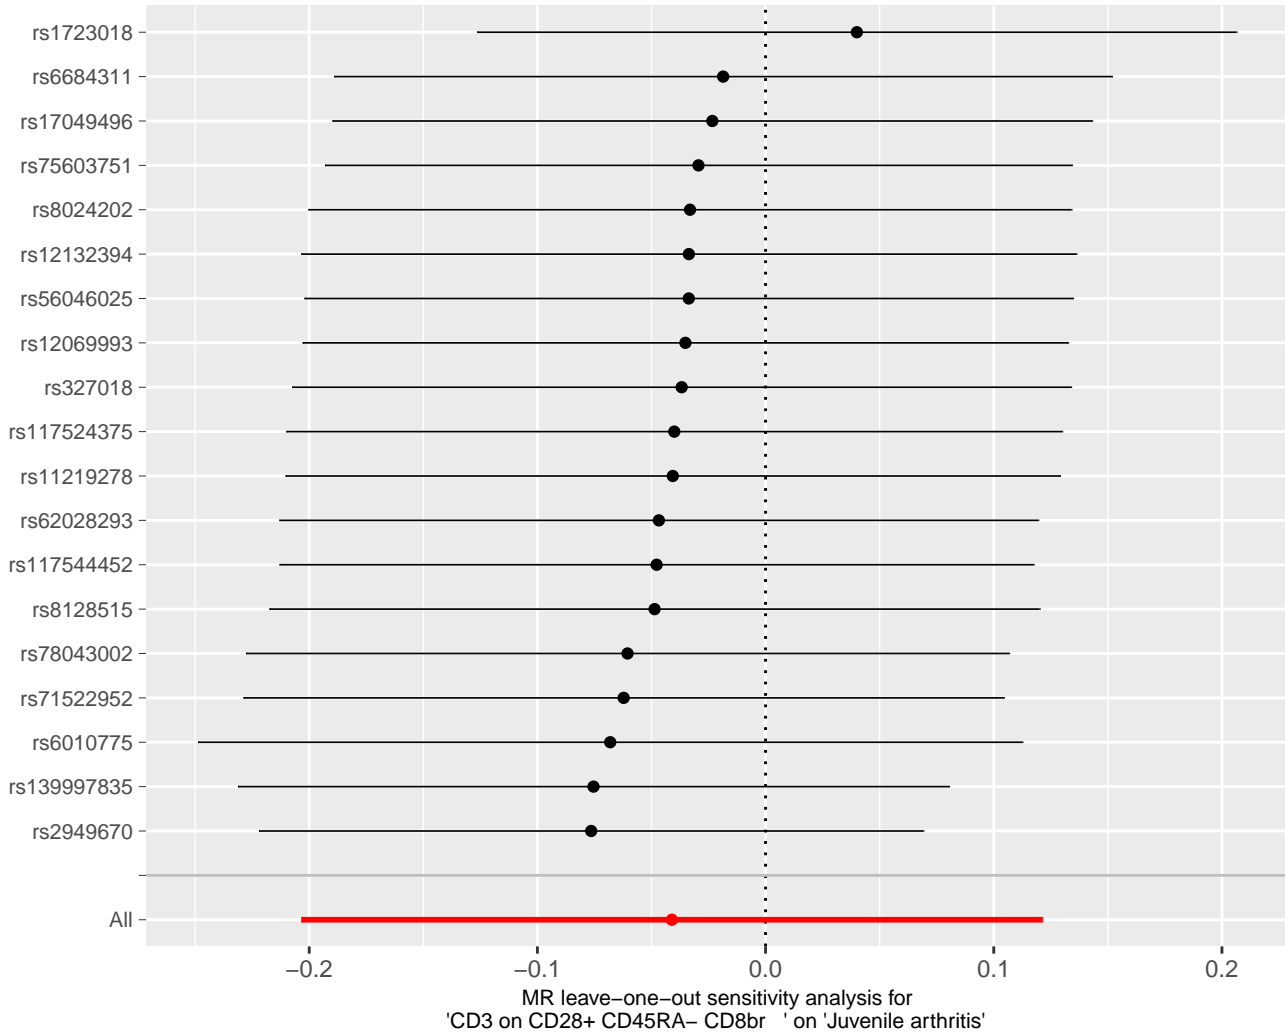

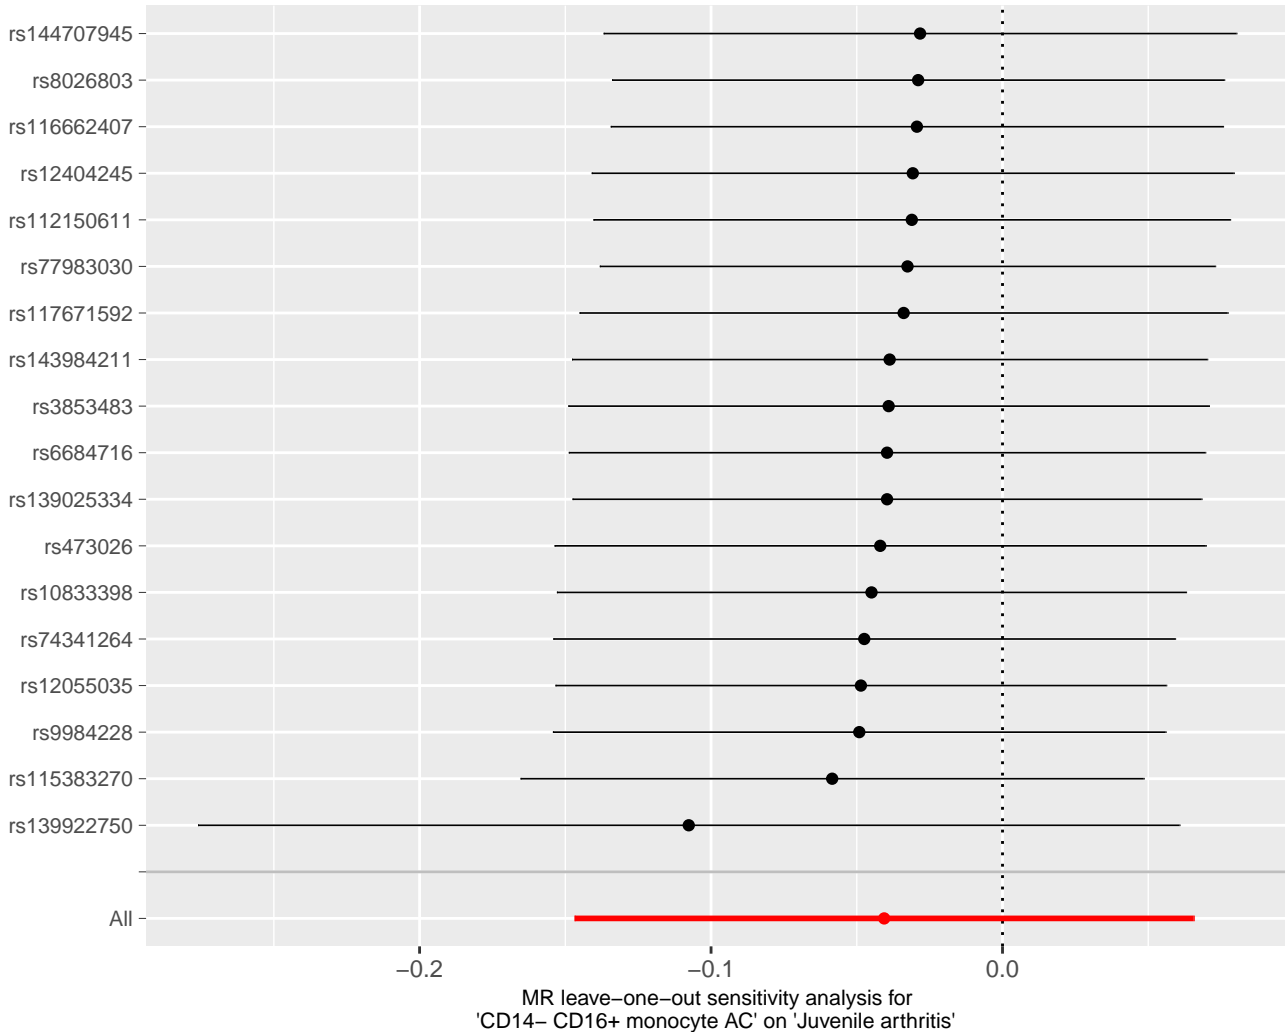

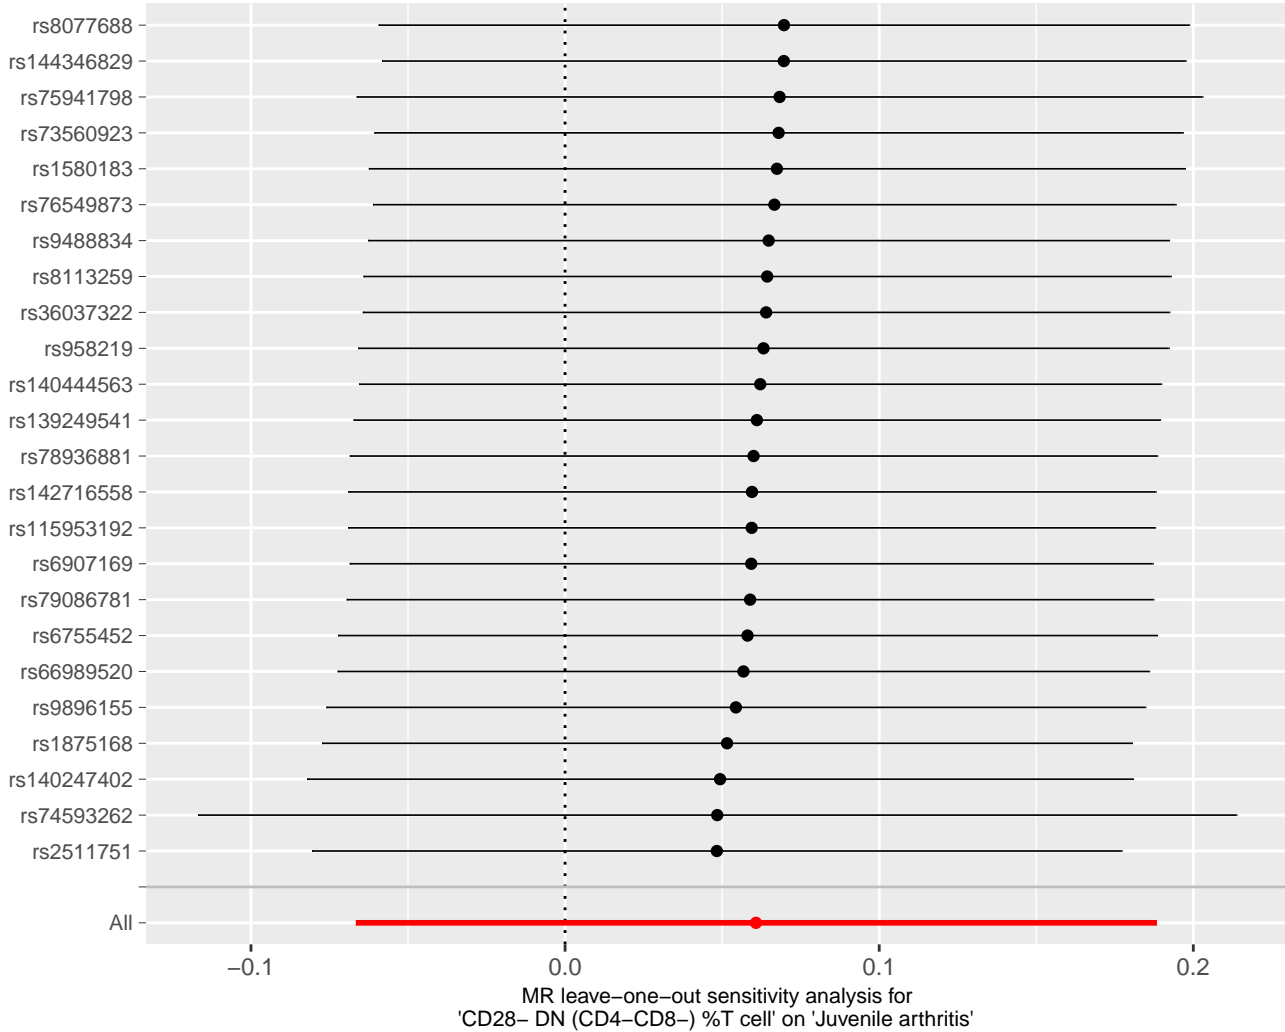

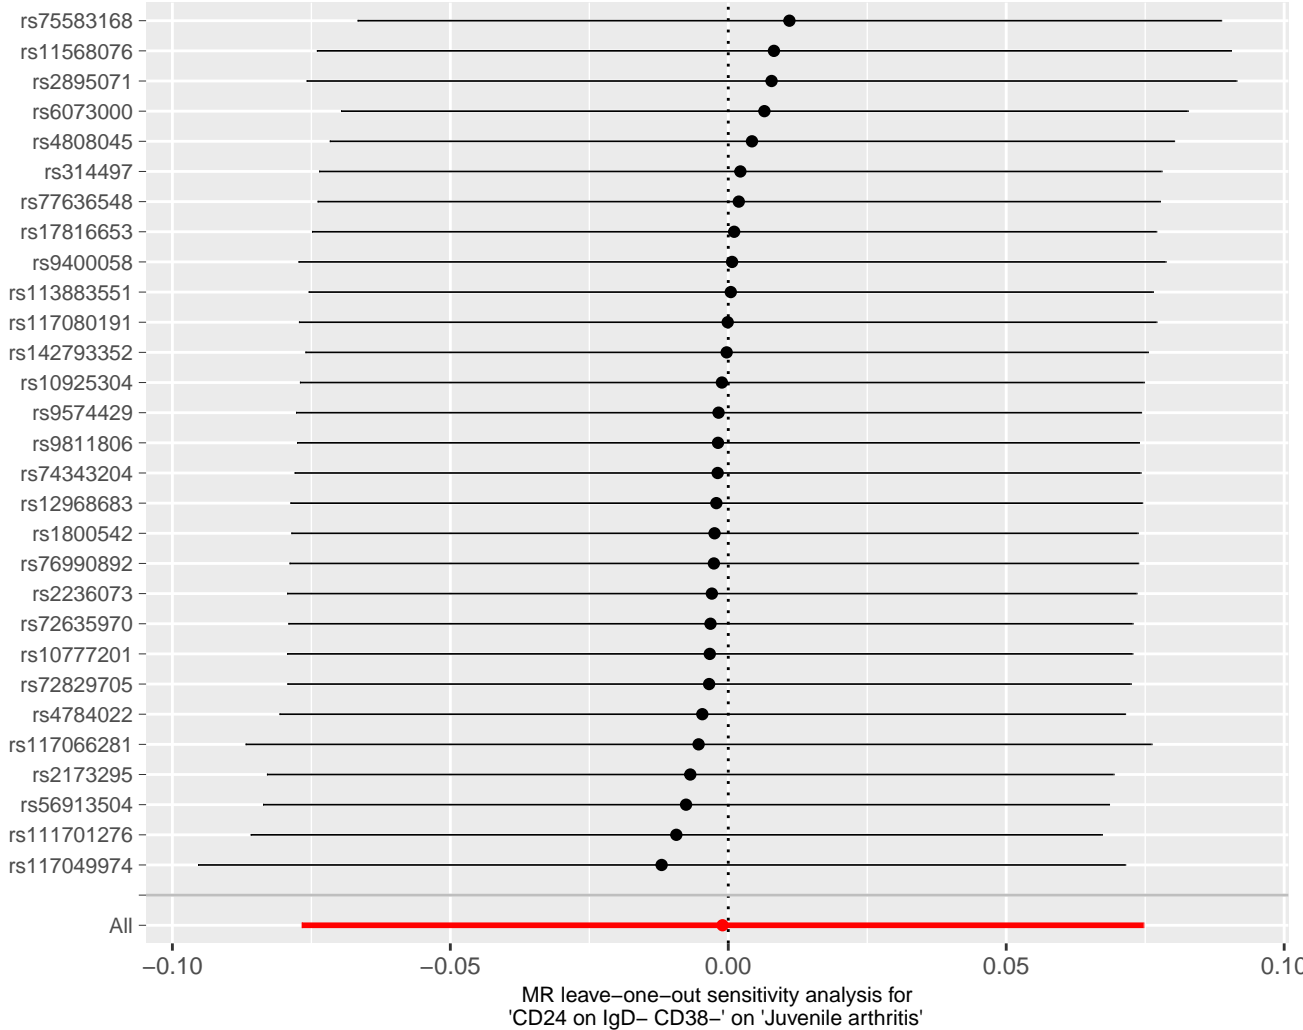

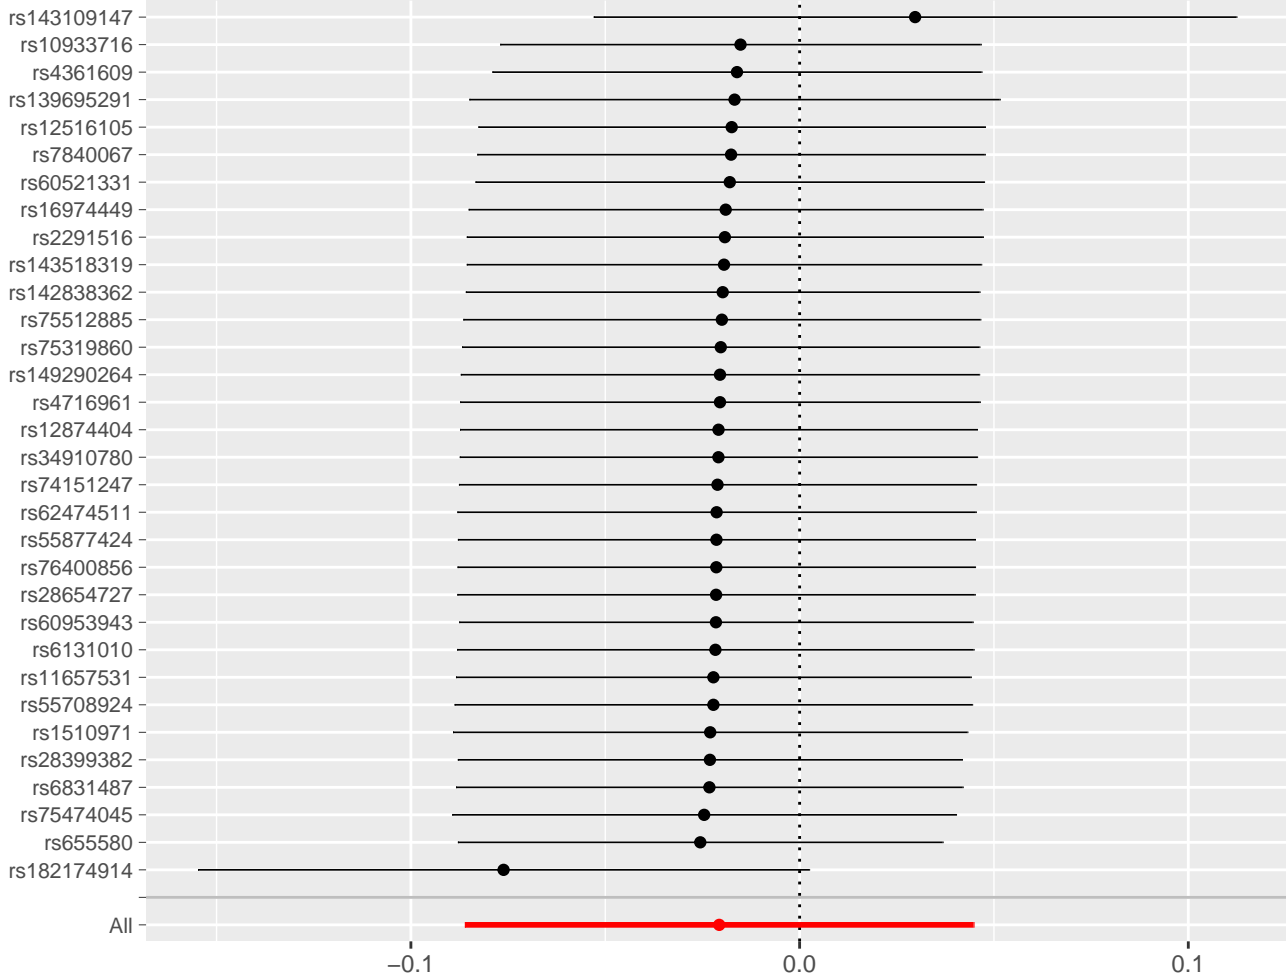

MR leave-one-out sensitivity analysis for 'IgD+ CD38dim %lymphocyte' on 'Juvenile arthritis'

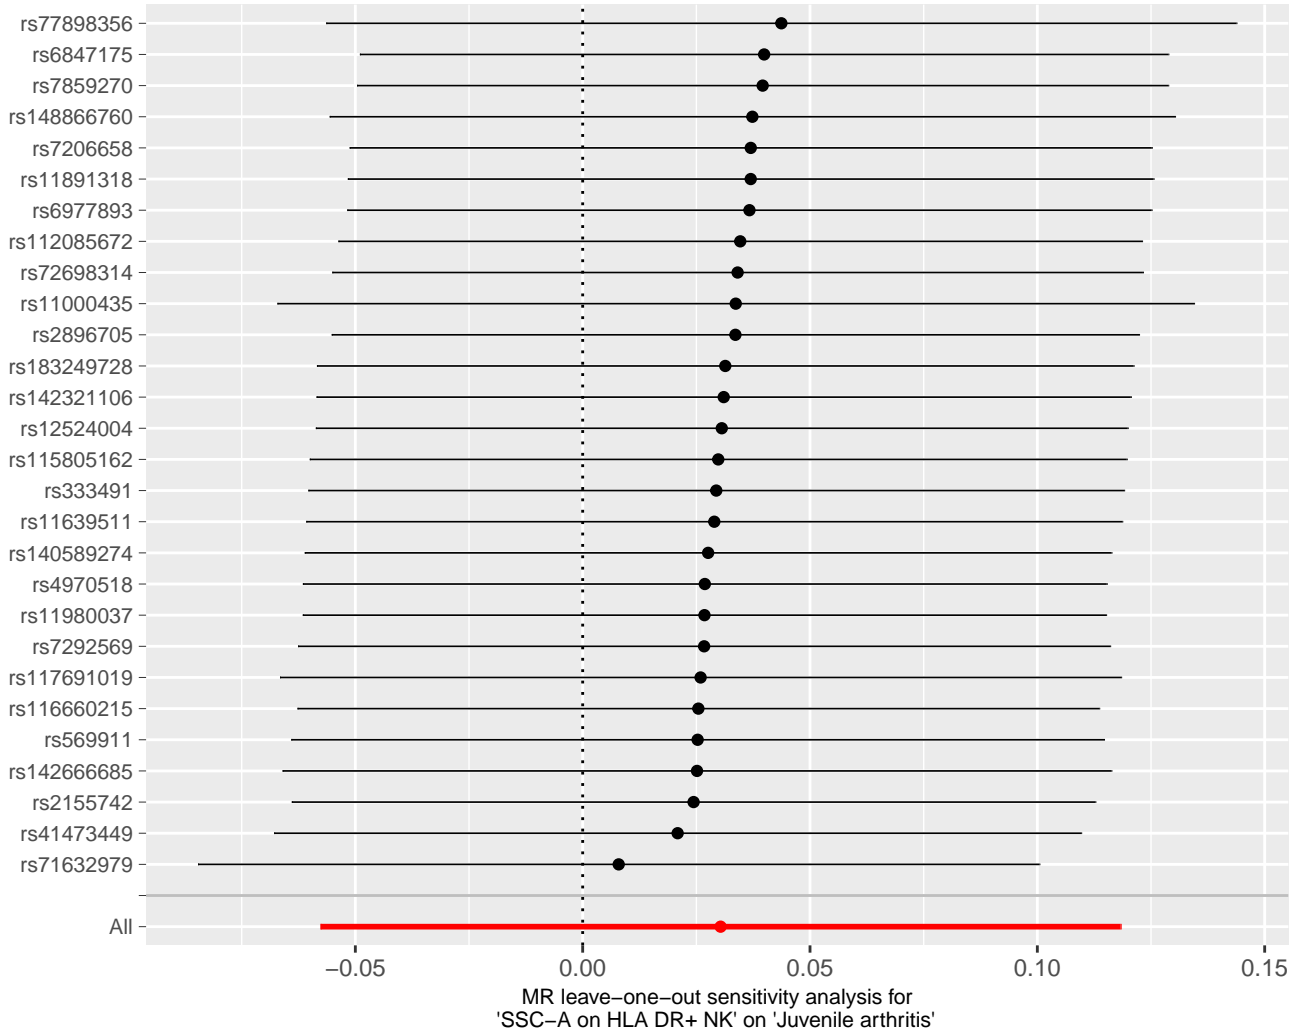



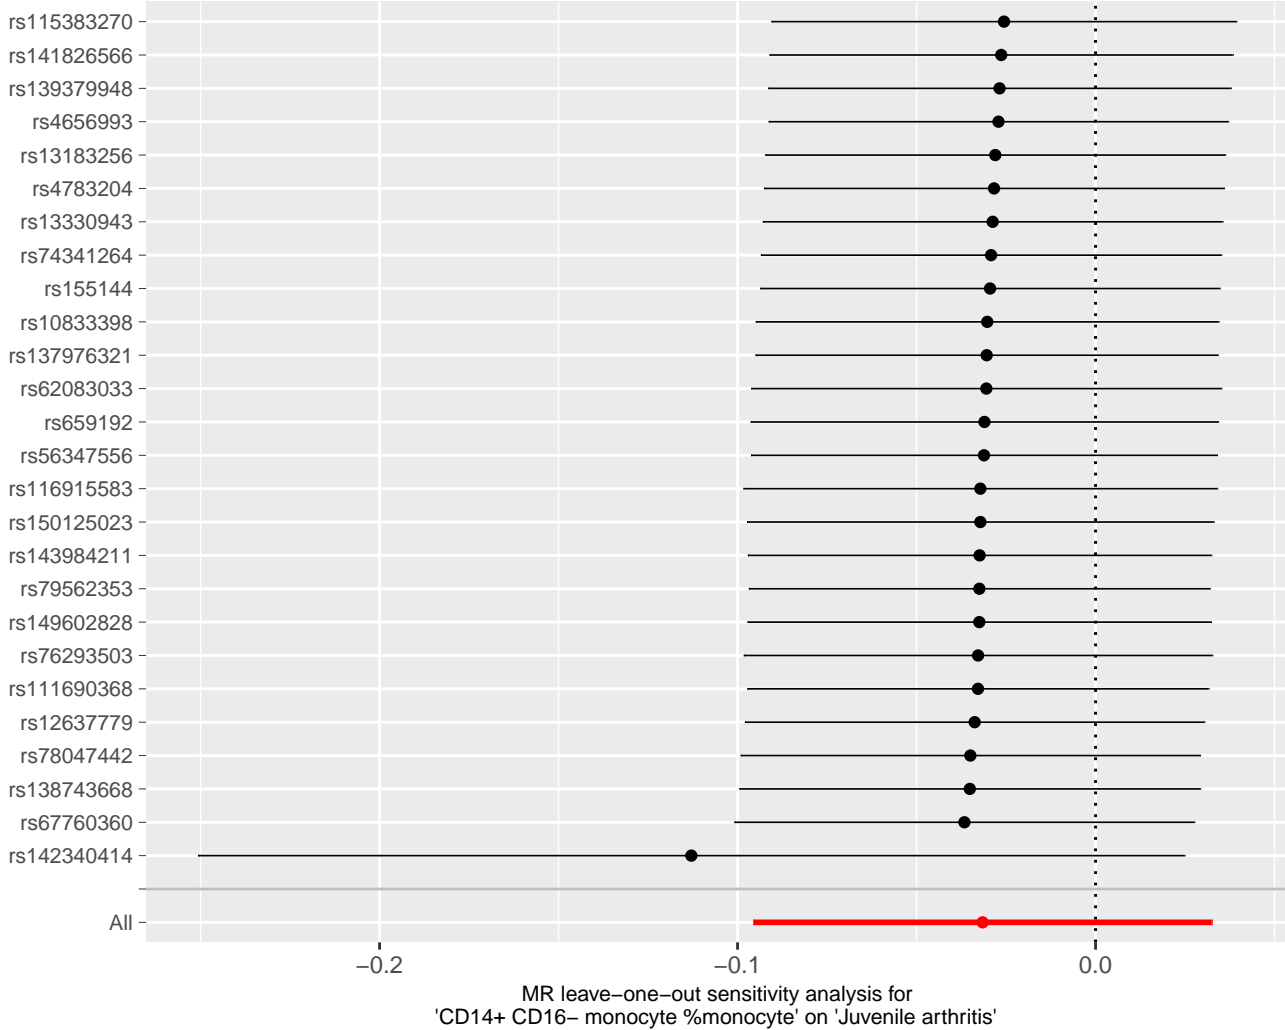

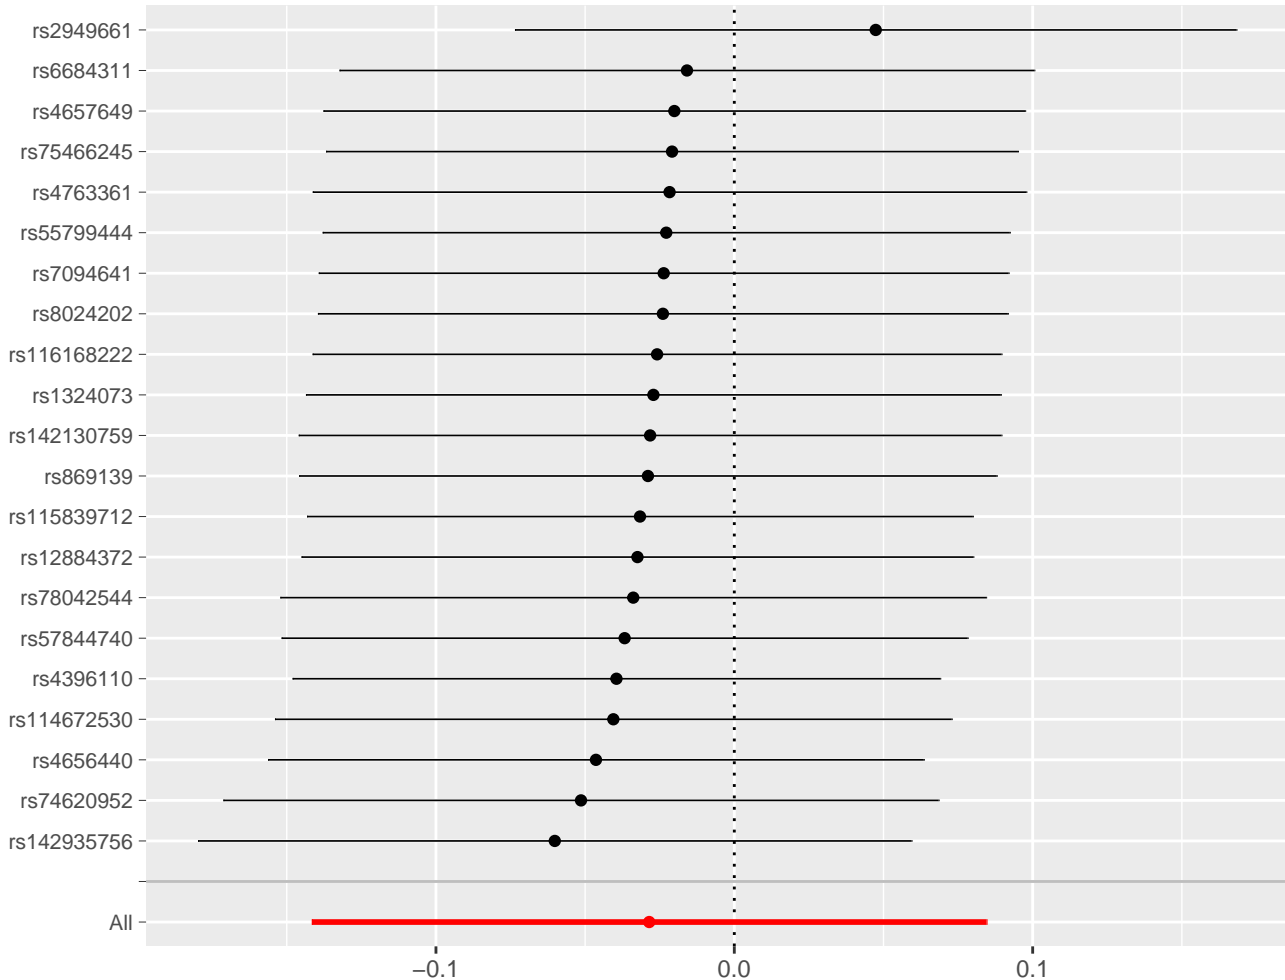

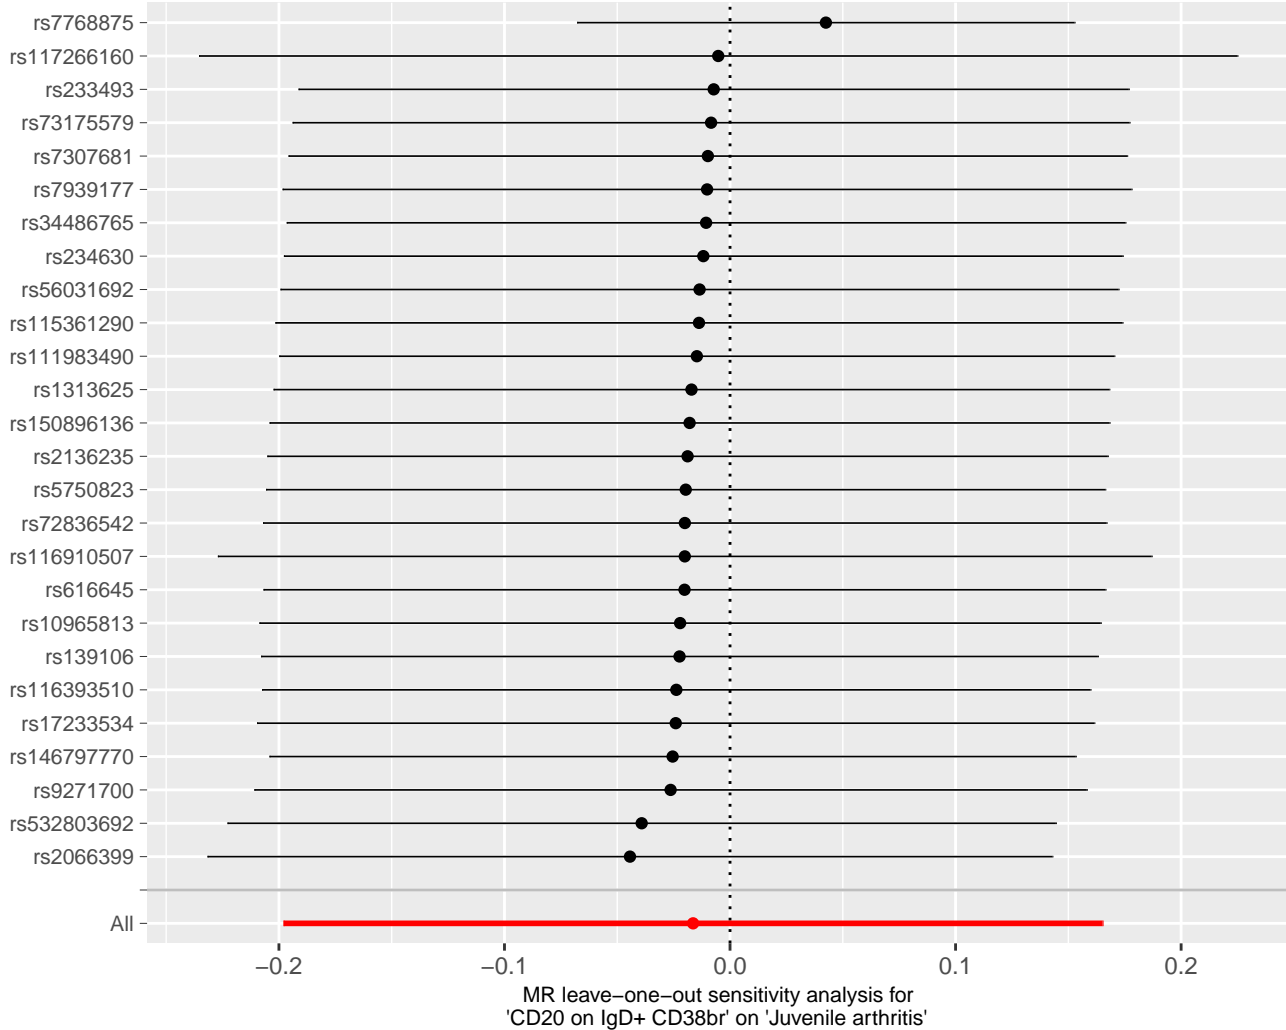

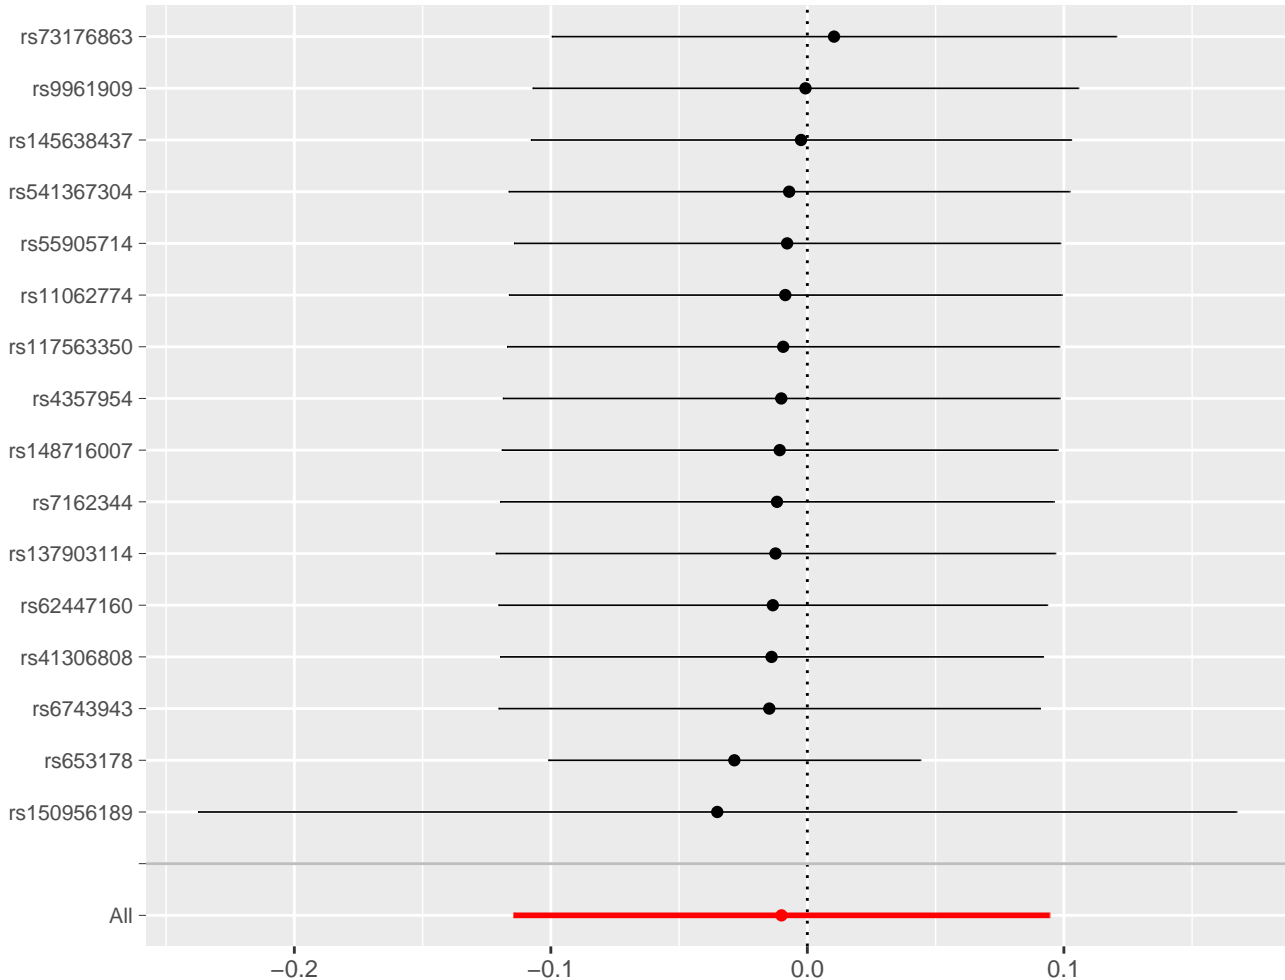

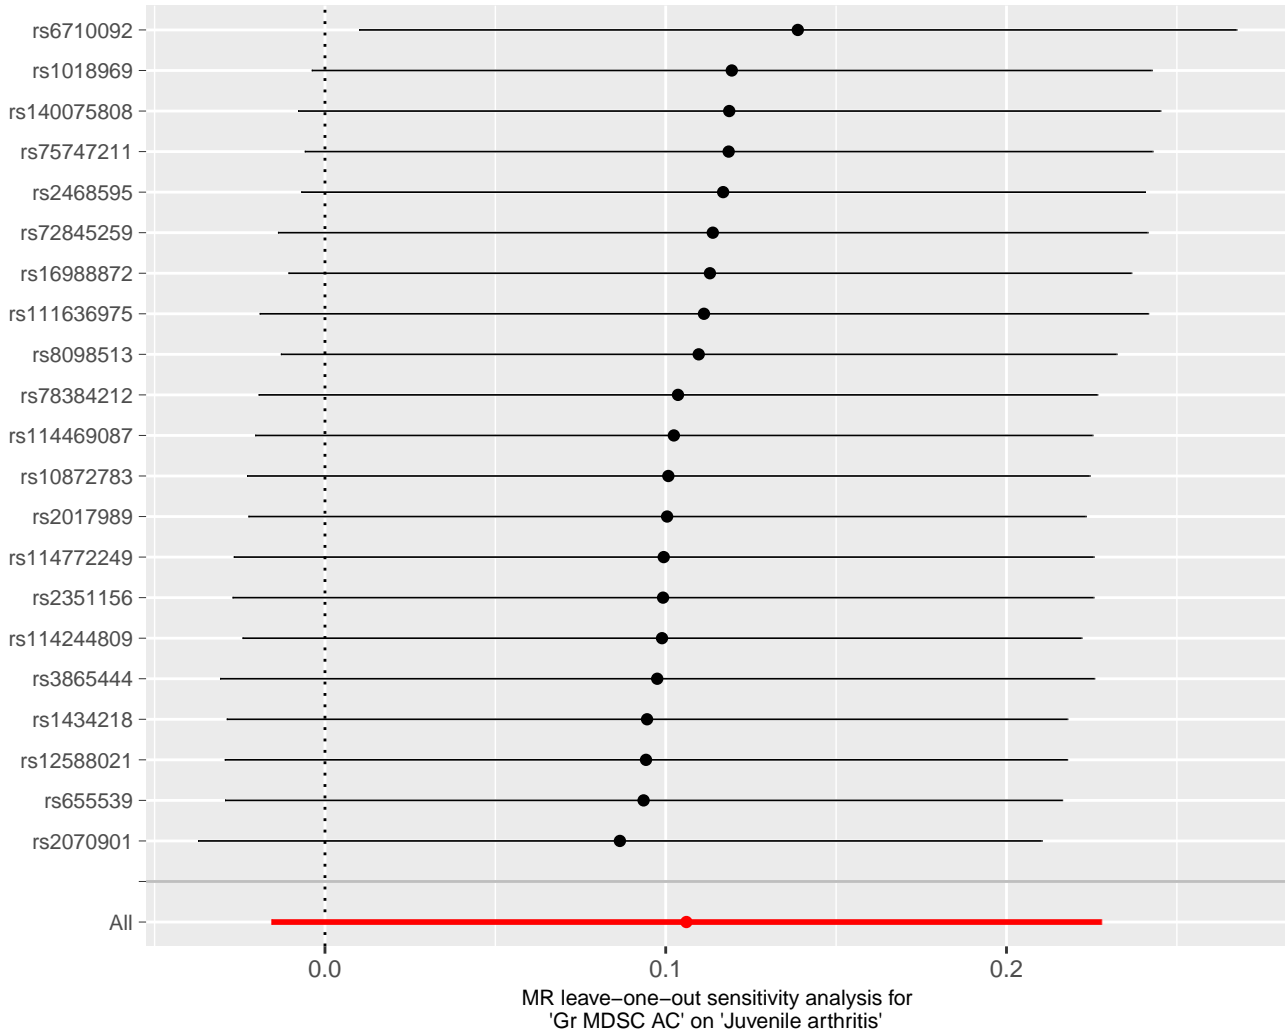

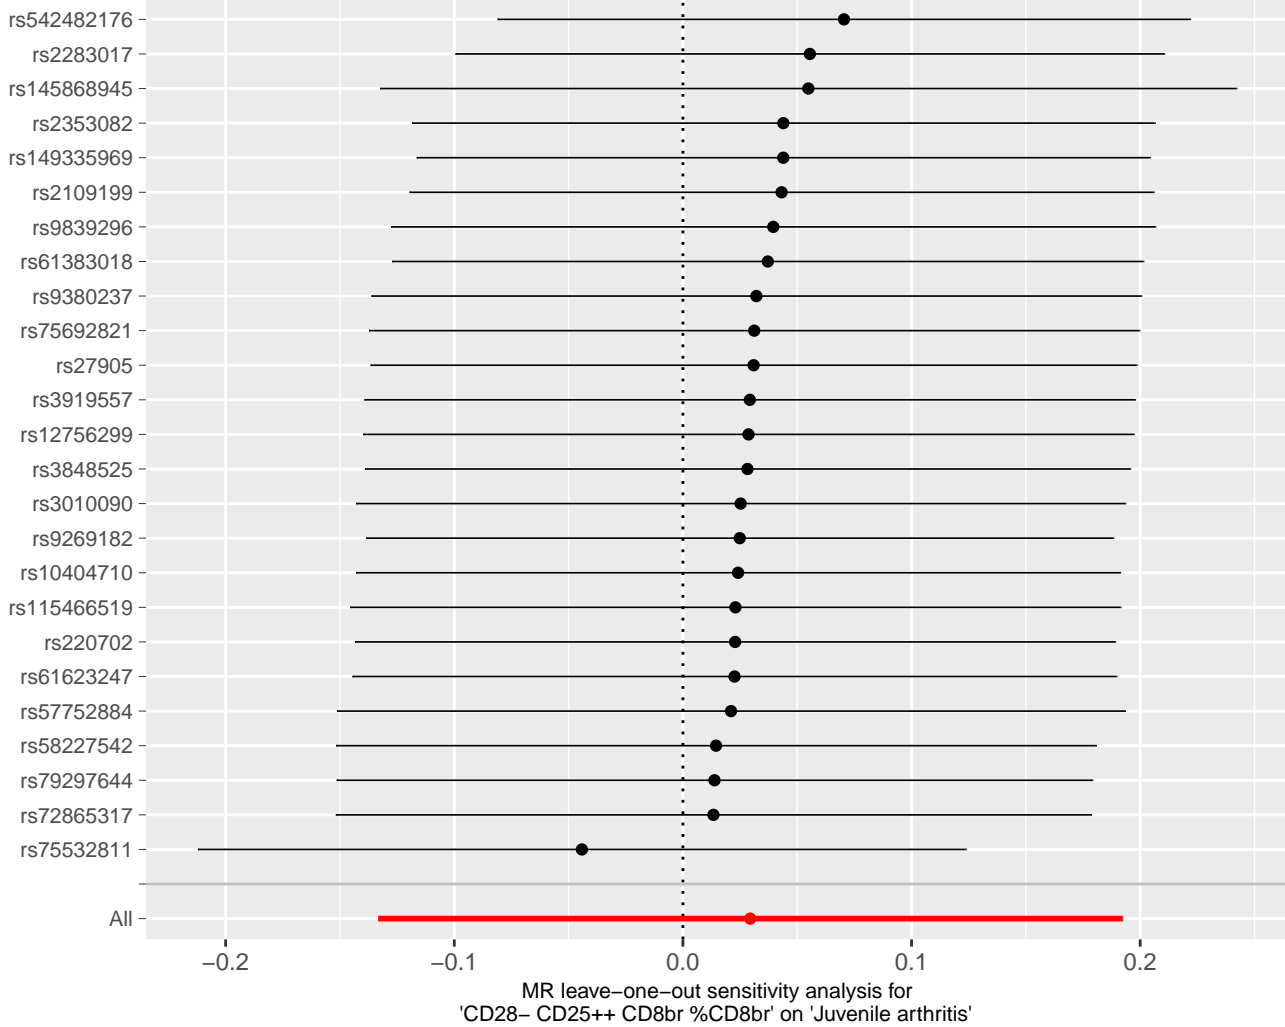

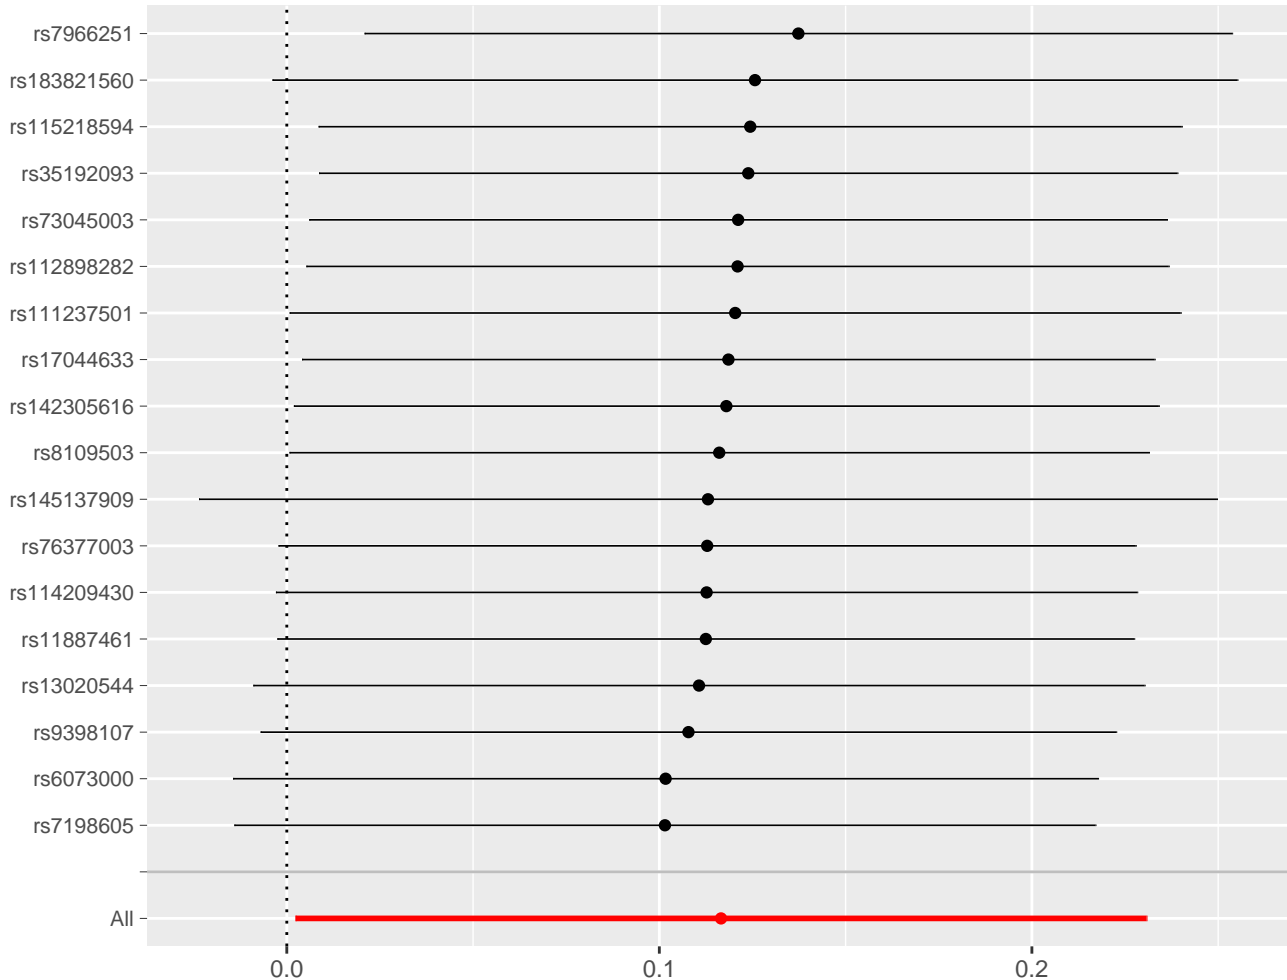

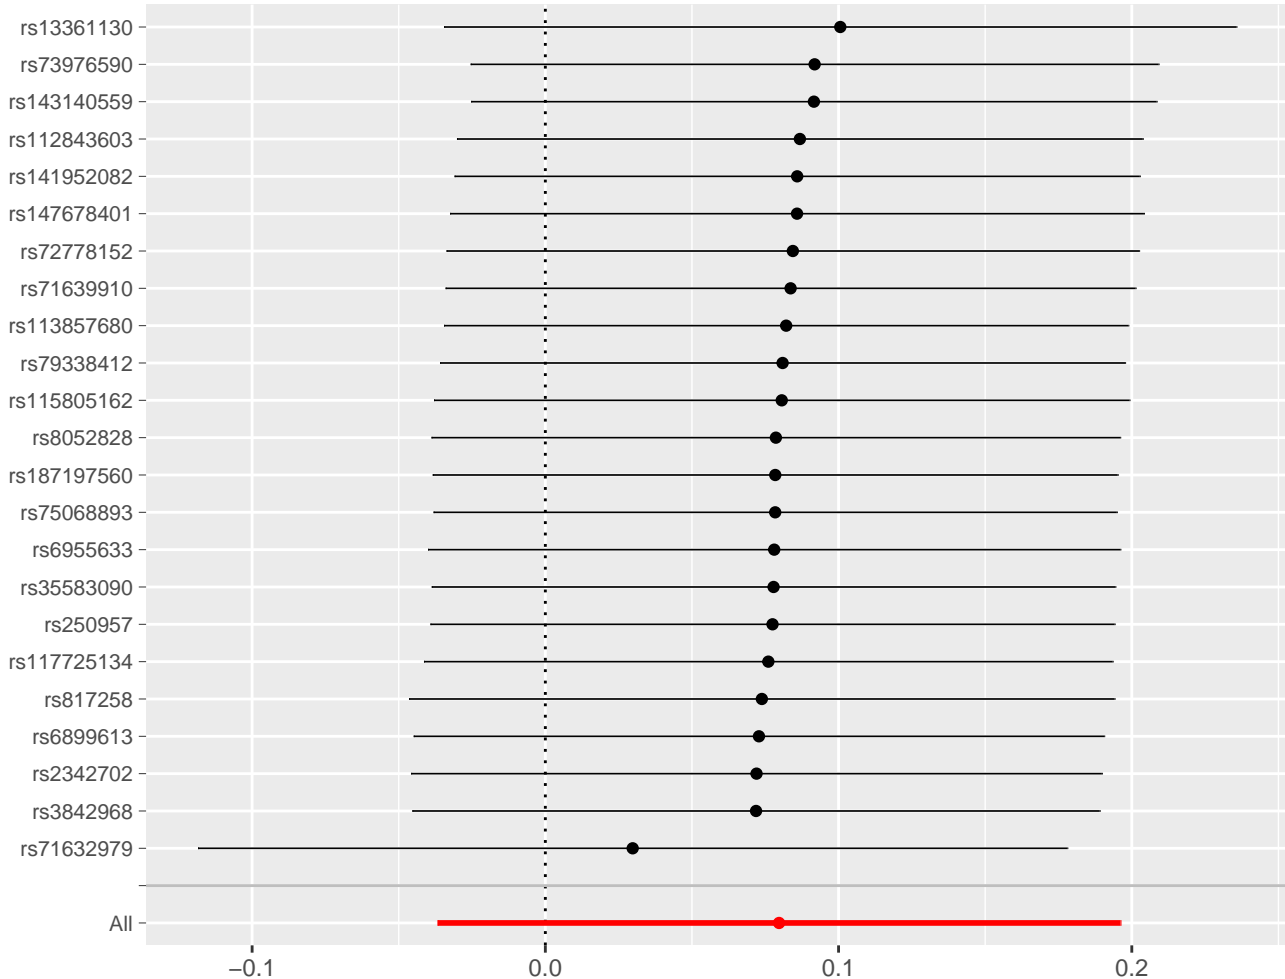

MR leave-one-out sensitivity analysis for  
'CD16 on CD14+ CD16+ monocyte' on 'Juvenile arthritis'



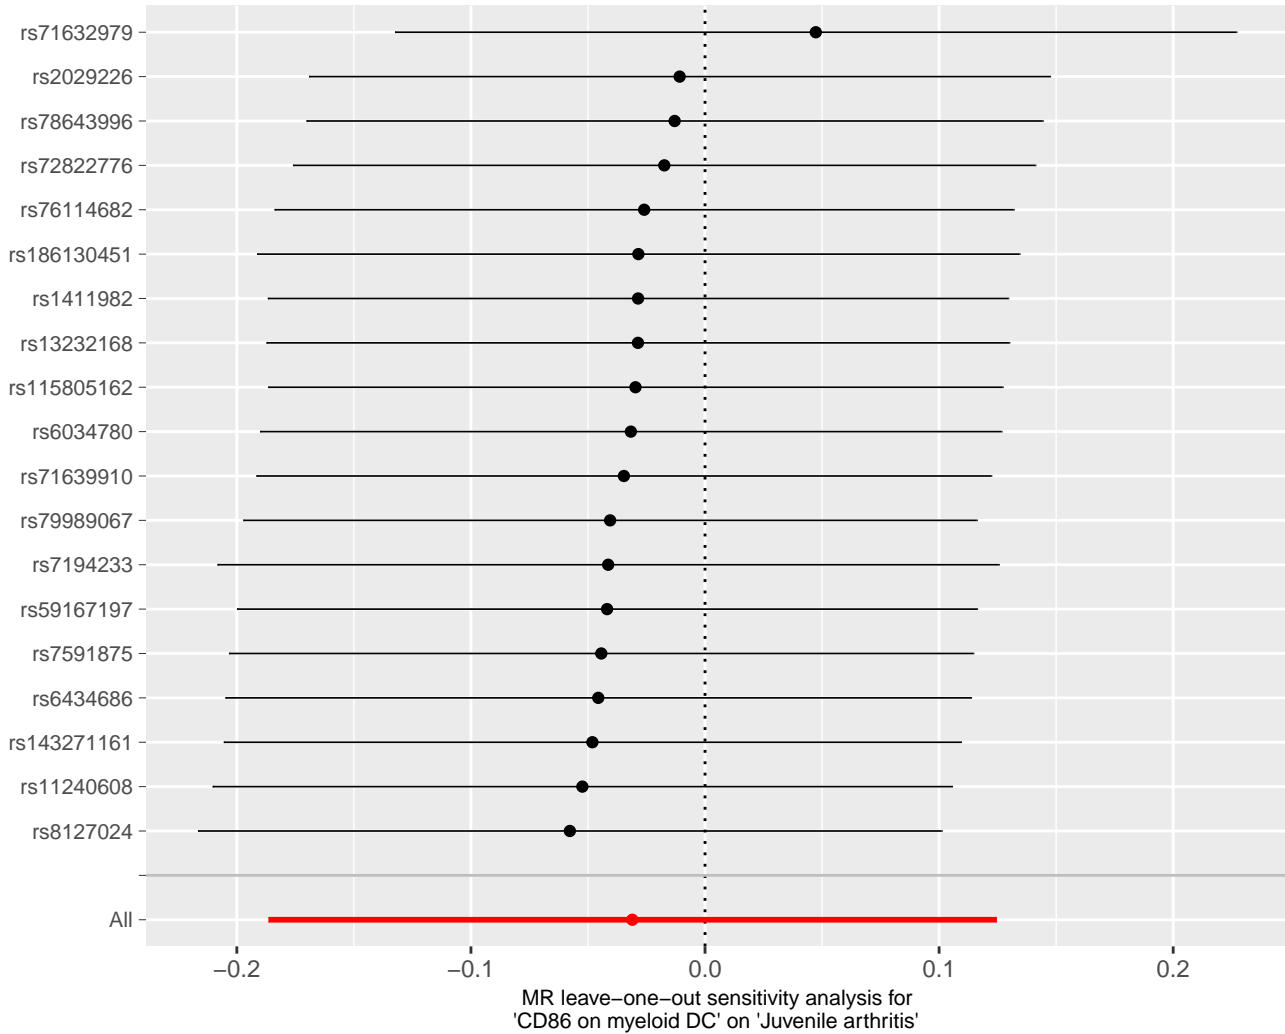

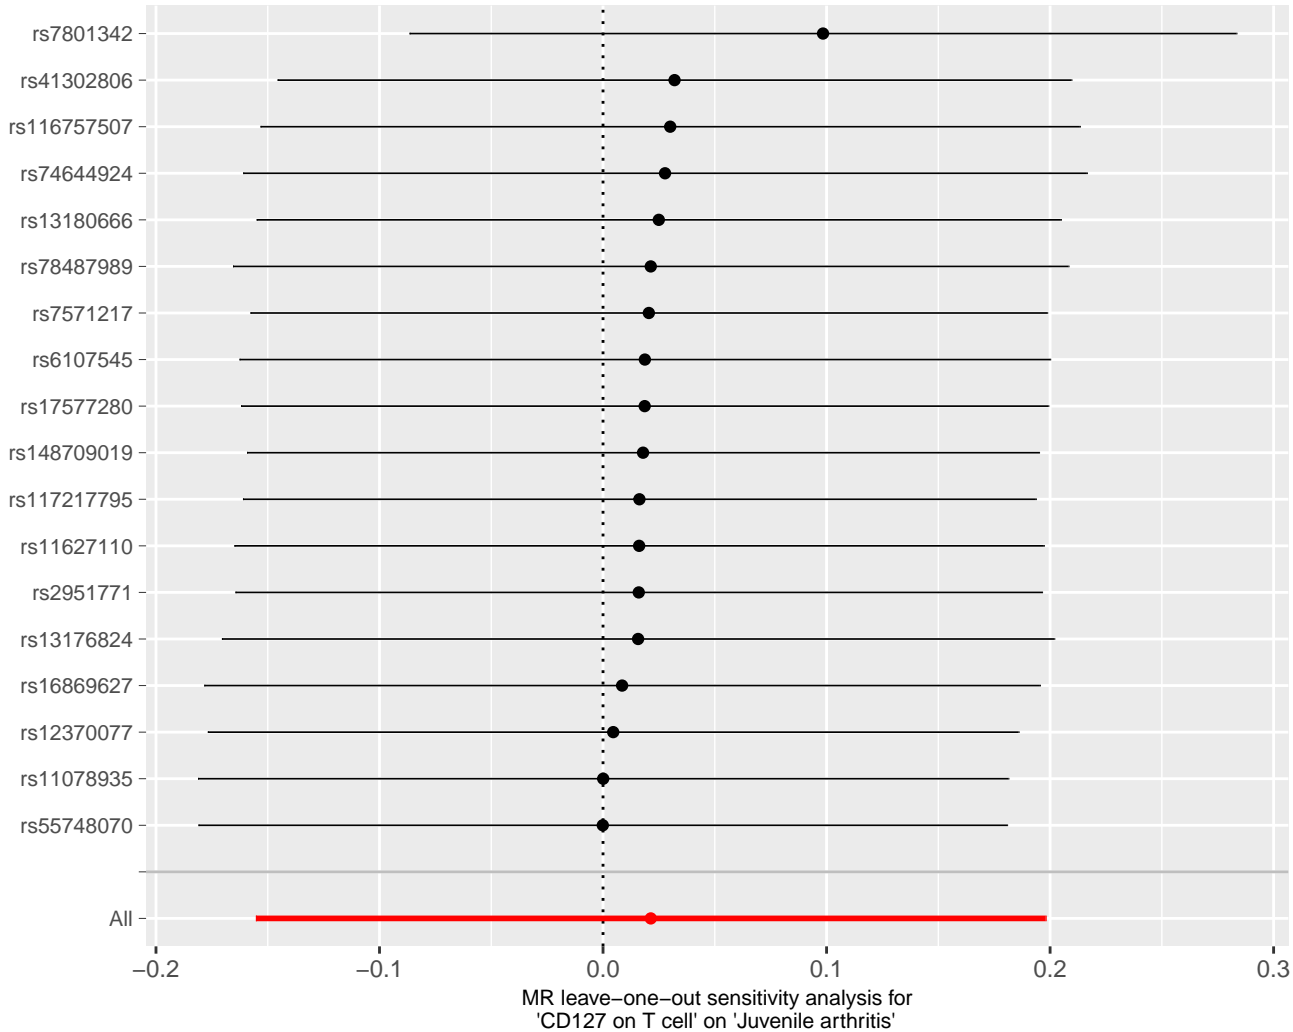

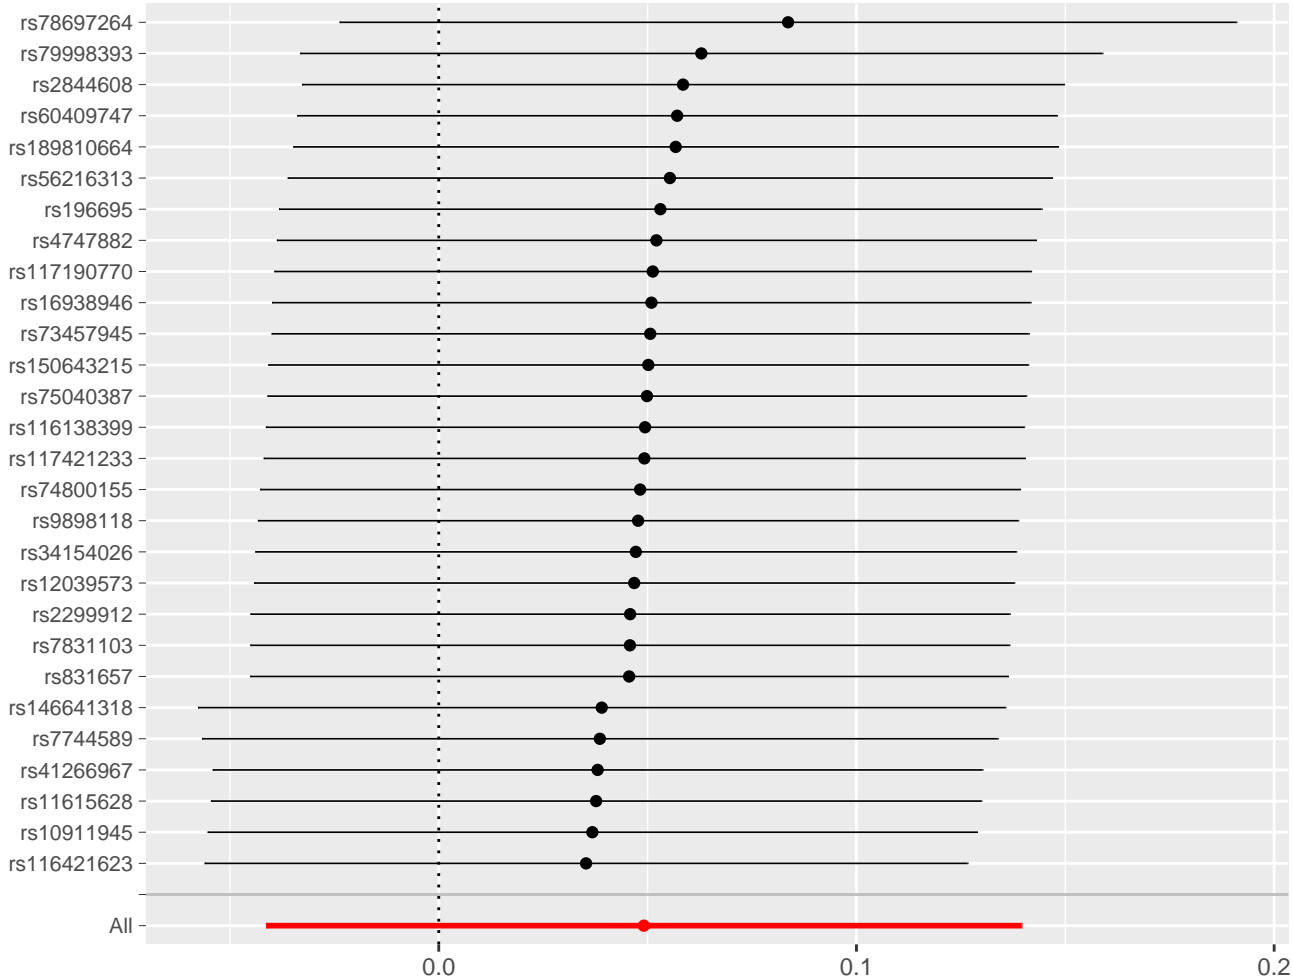

MR leave-one-out sensitivity analysis for 'CD4 on CD4 Treg' on 'Juvenile arthritis'

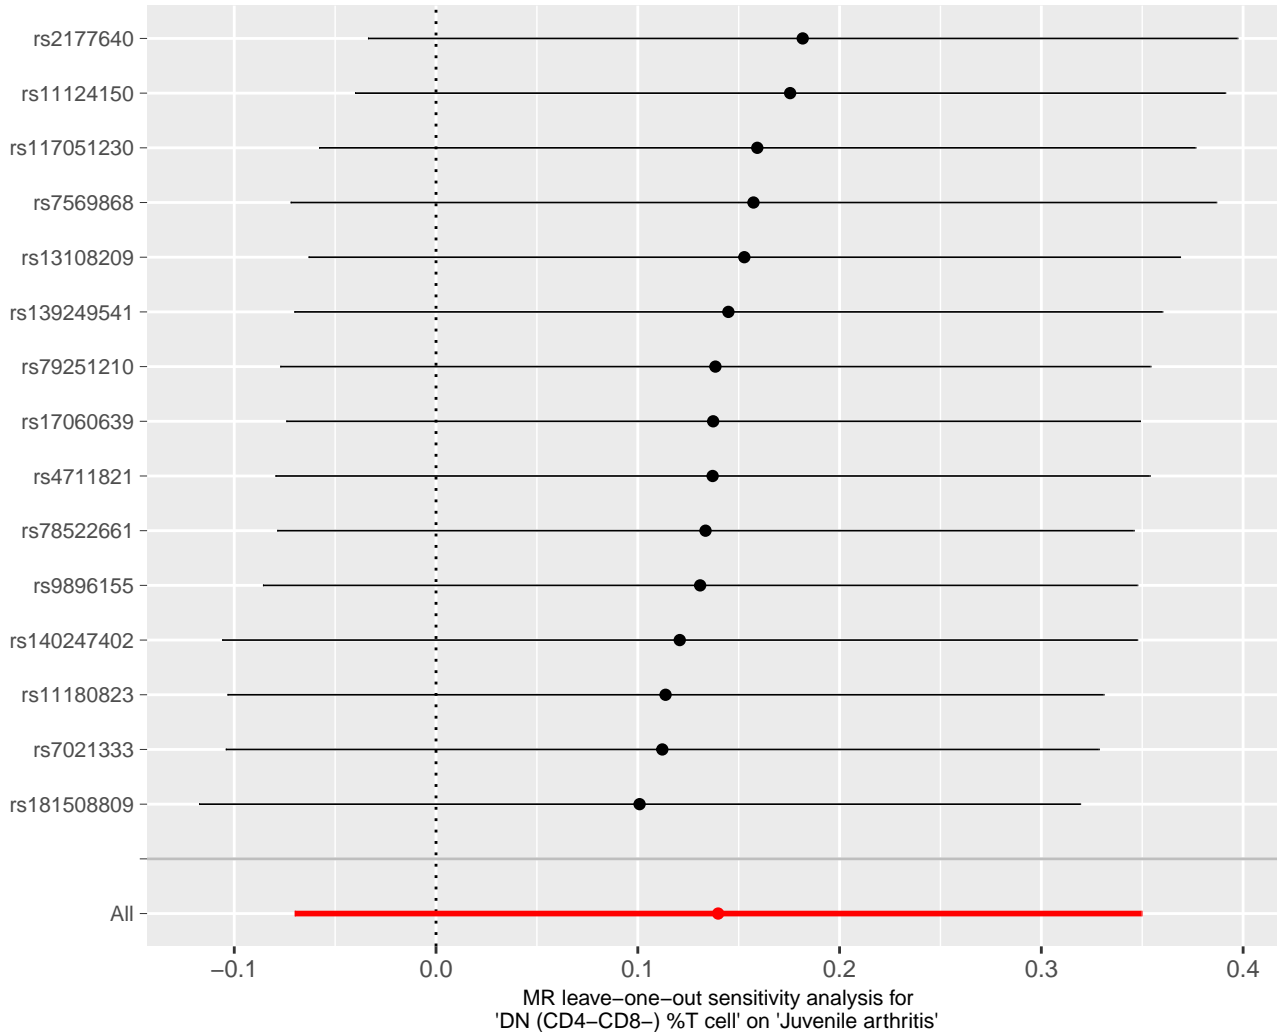

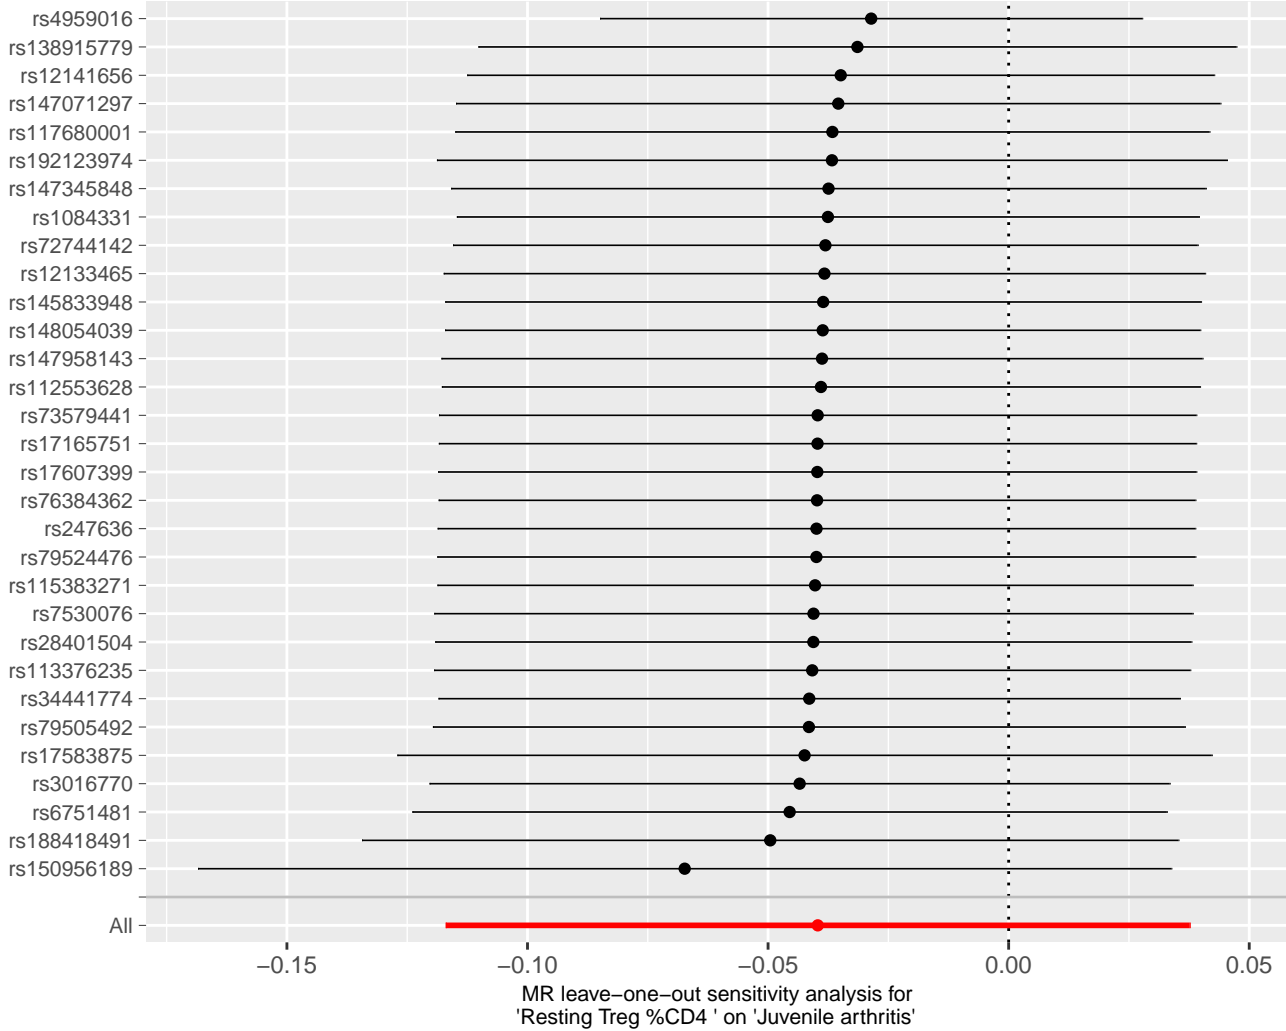

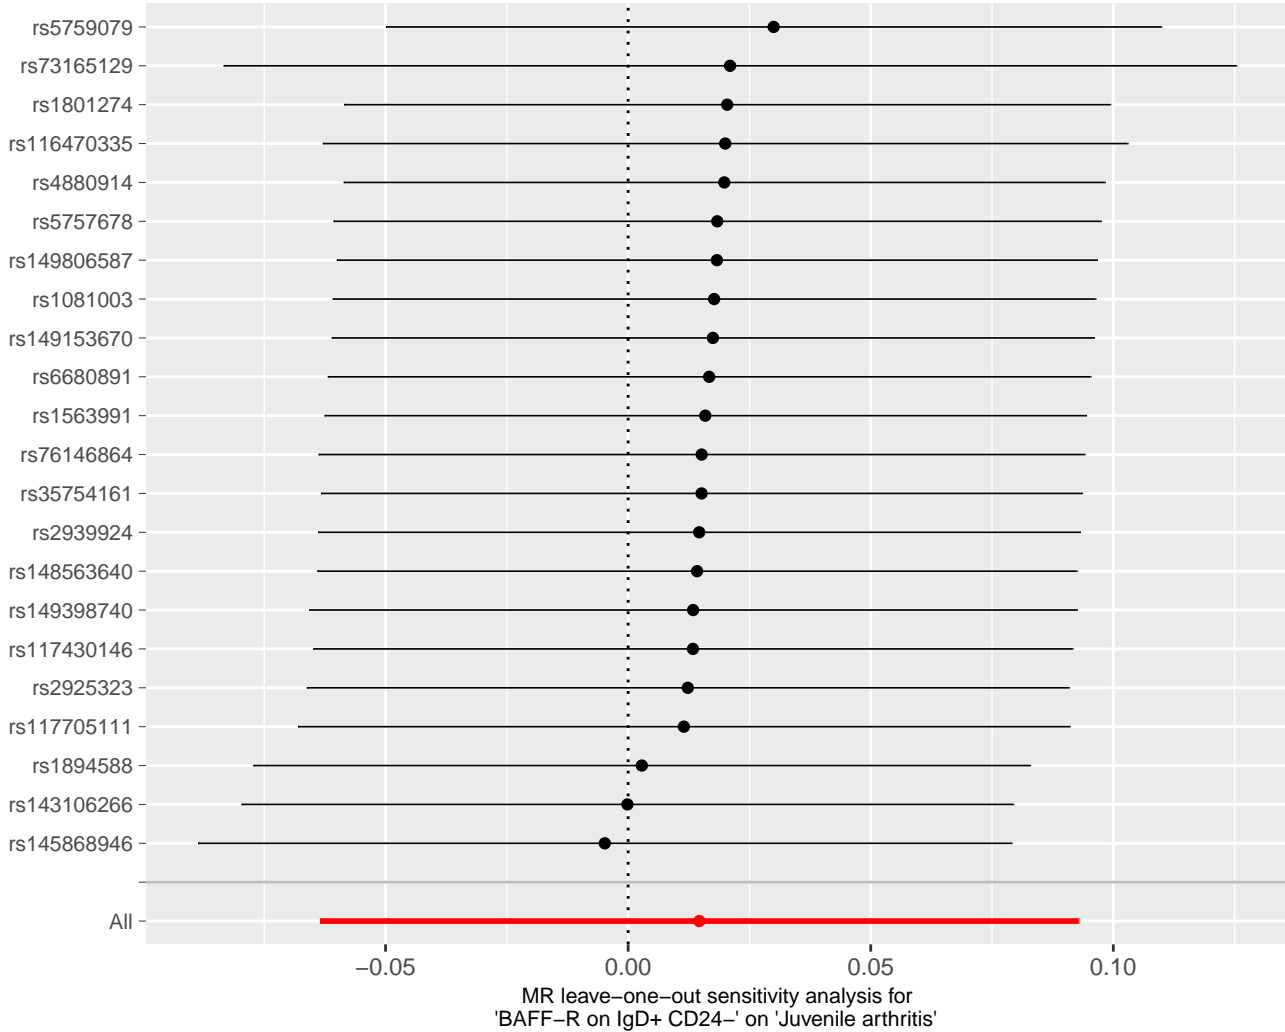

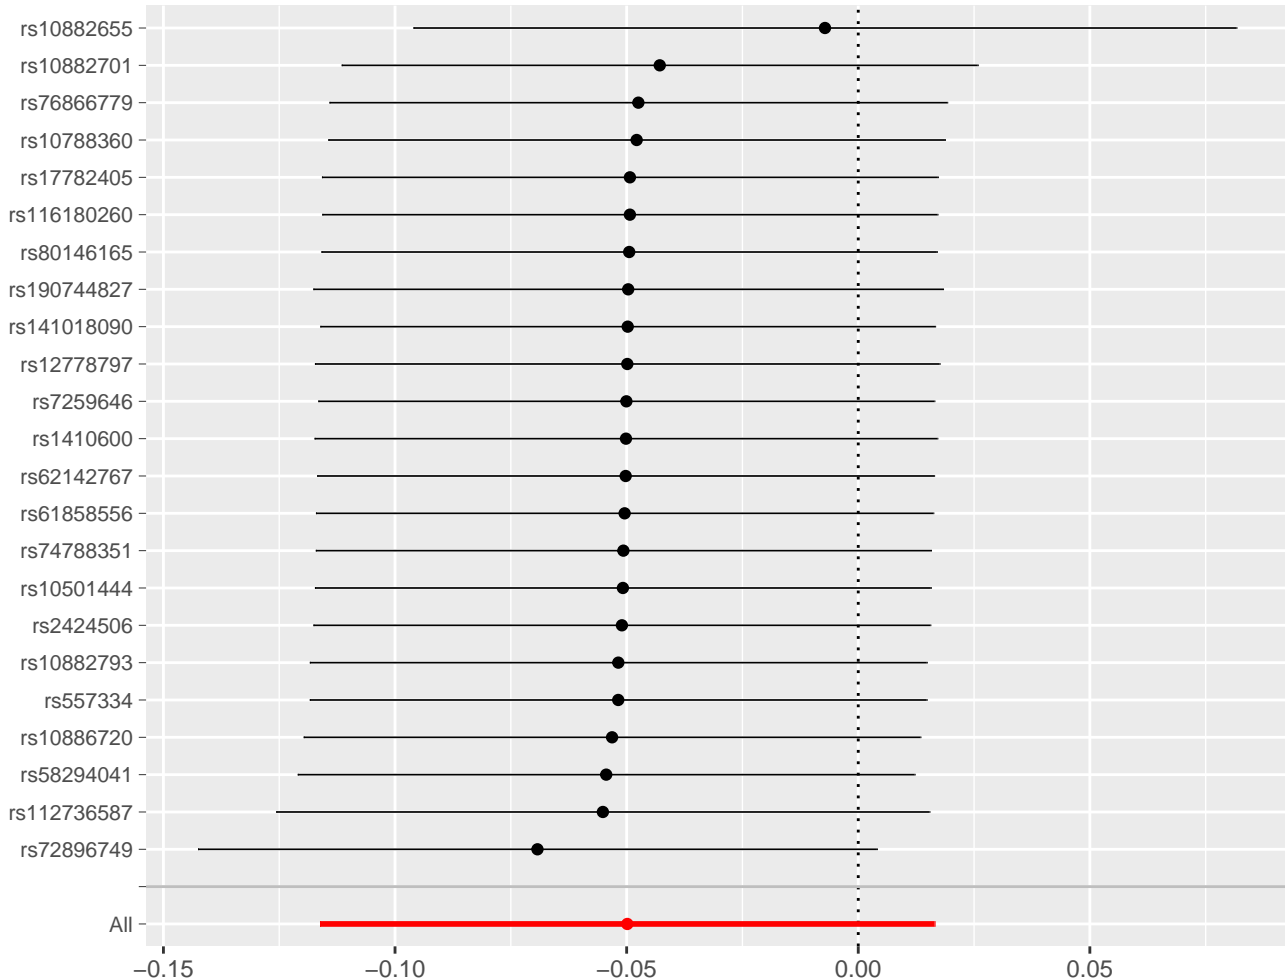

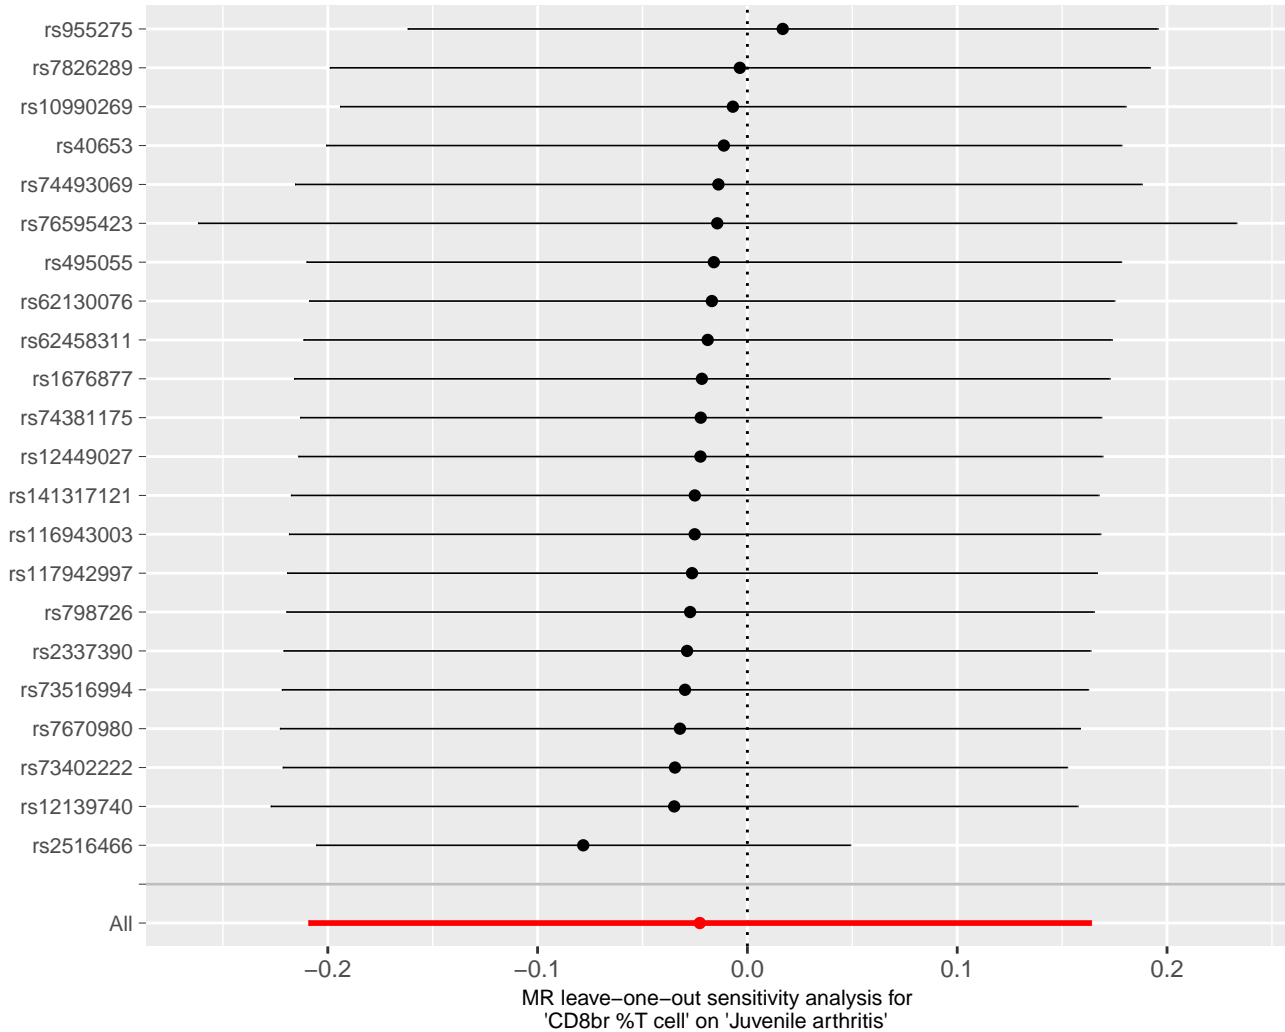



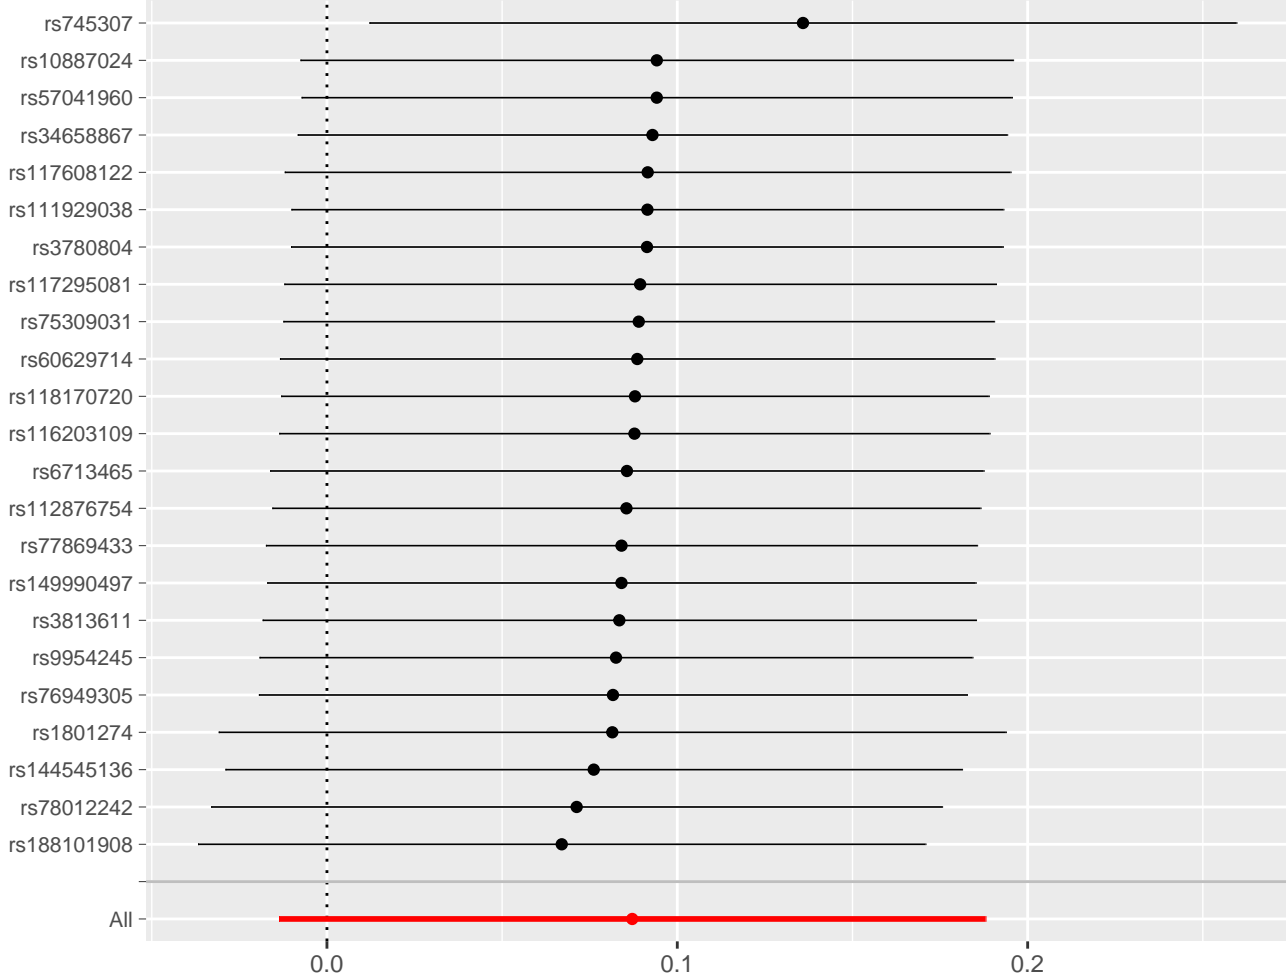

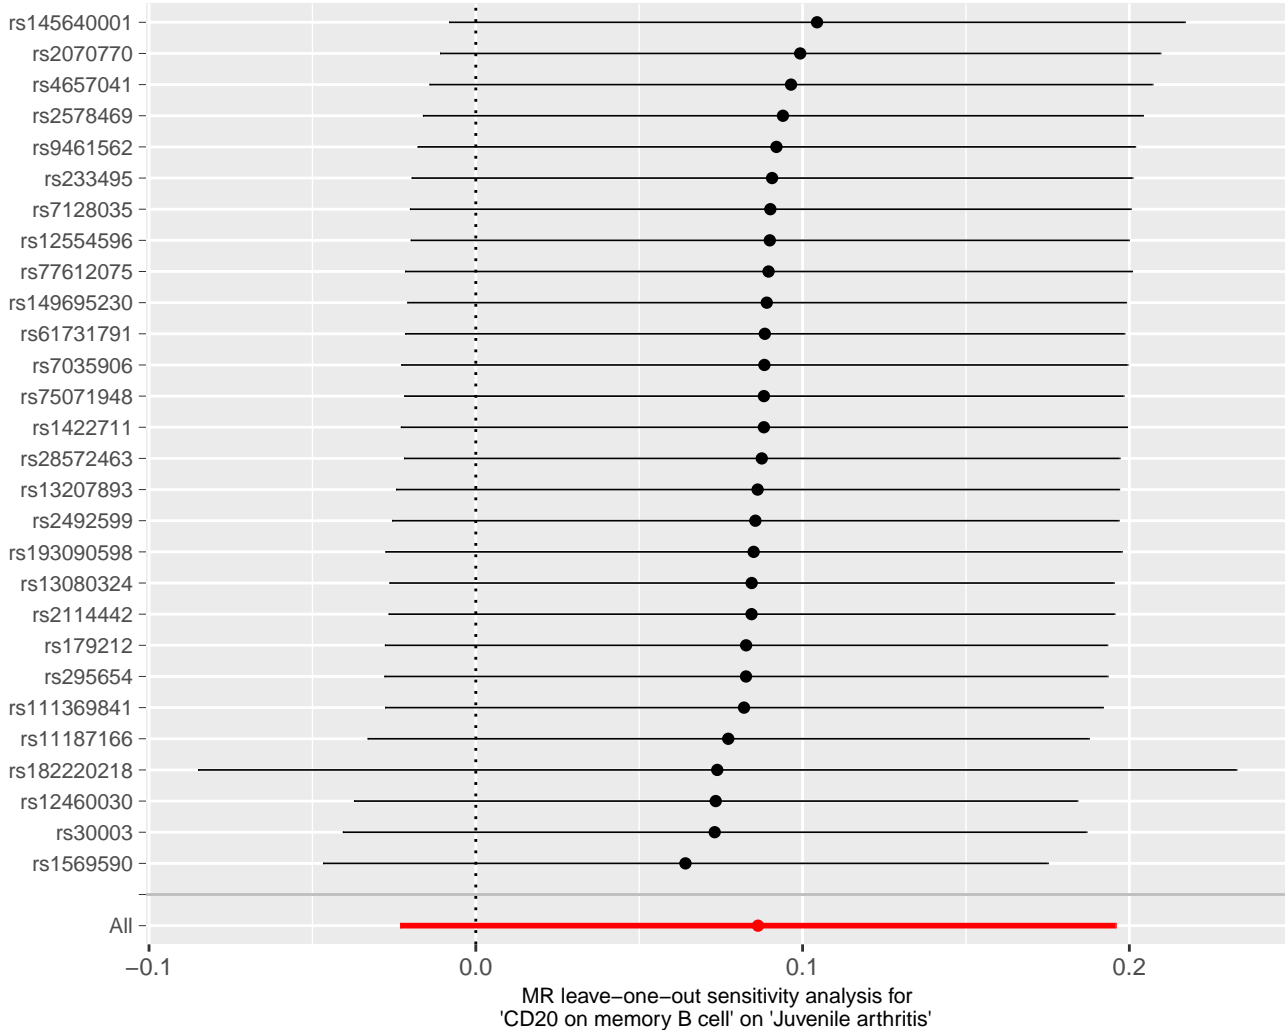

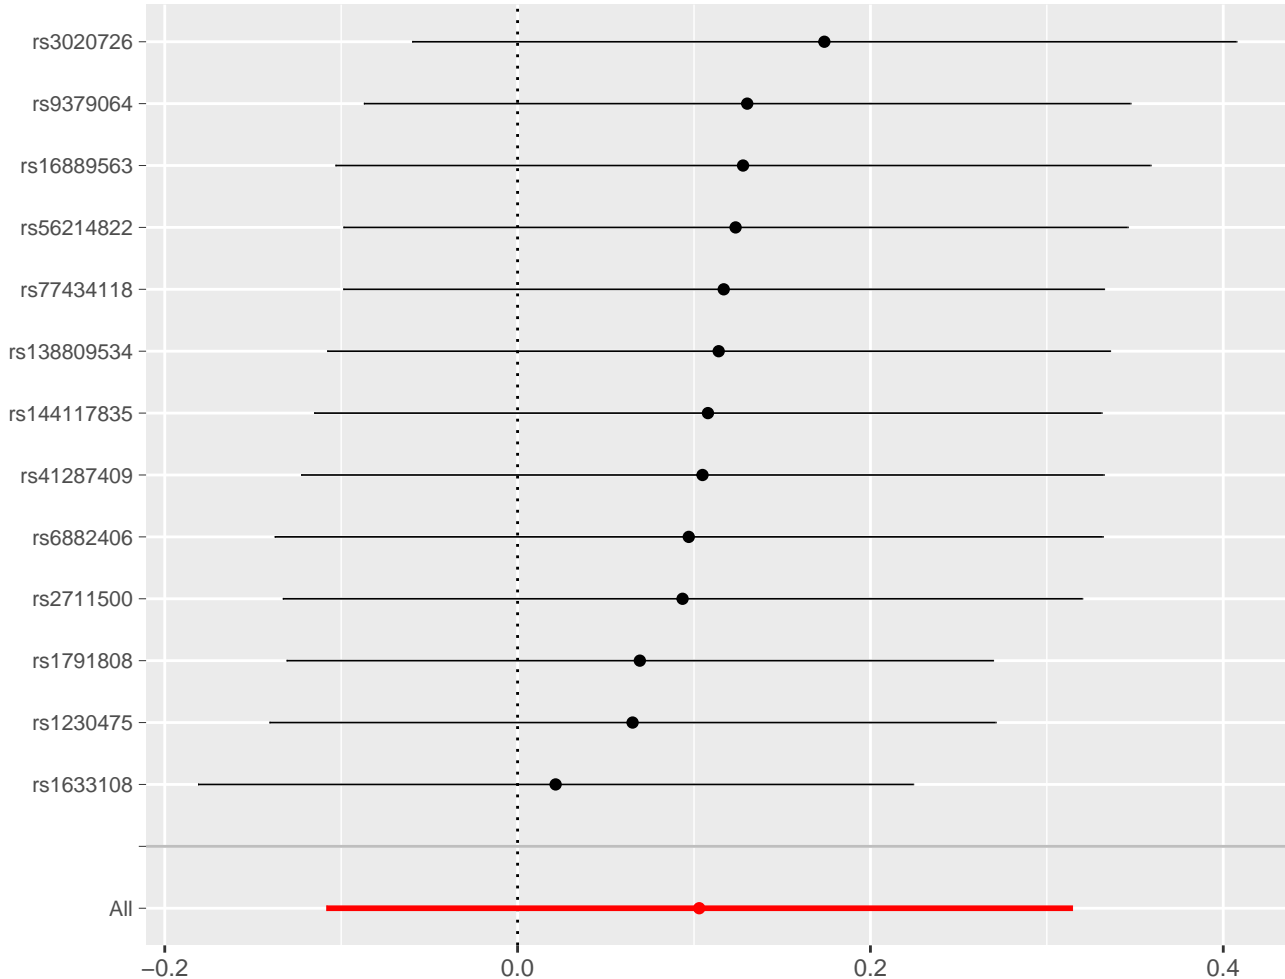

MR leave-one-out sensitivity analysis for 'CD8 on CM CD8br' on 'Juvenile arthritis'

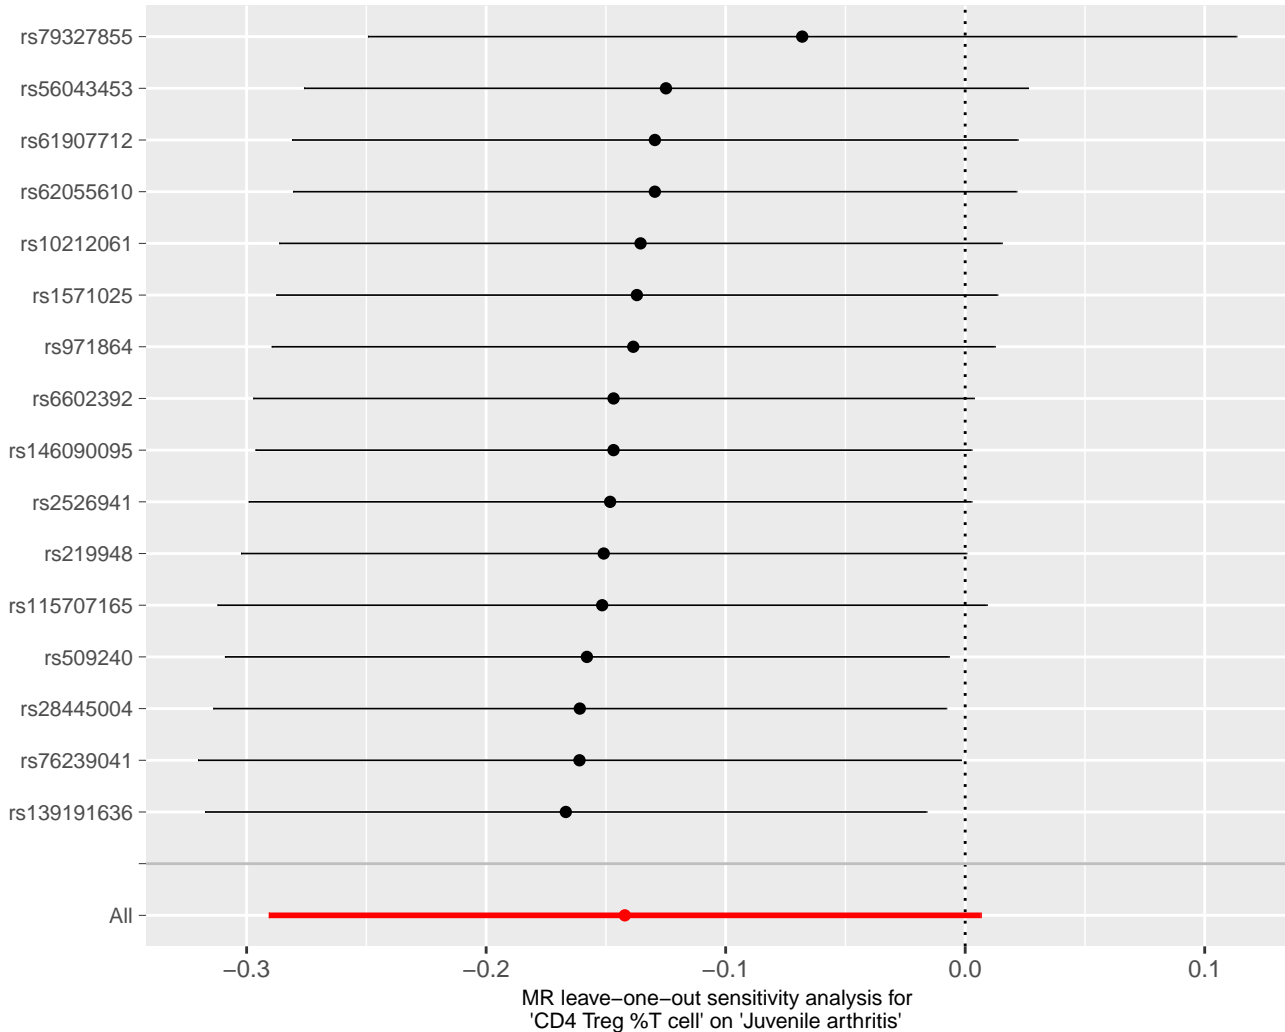

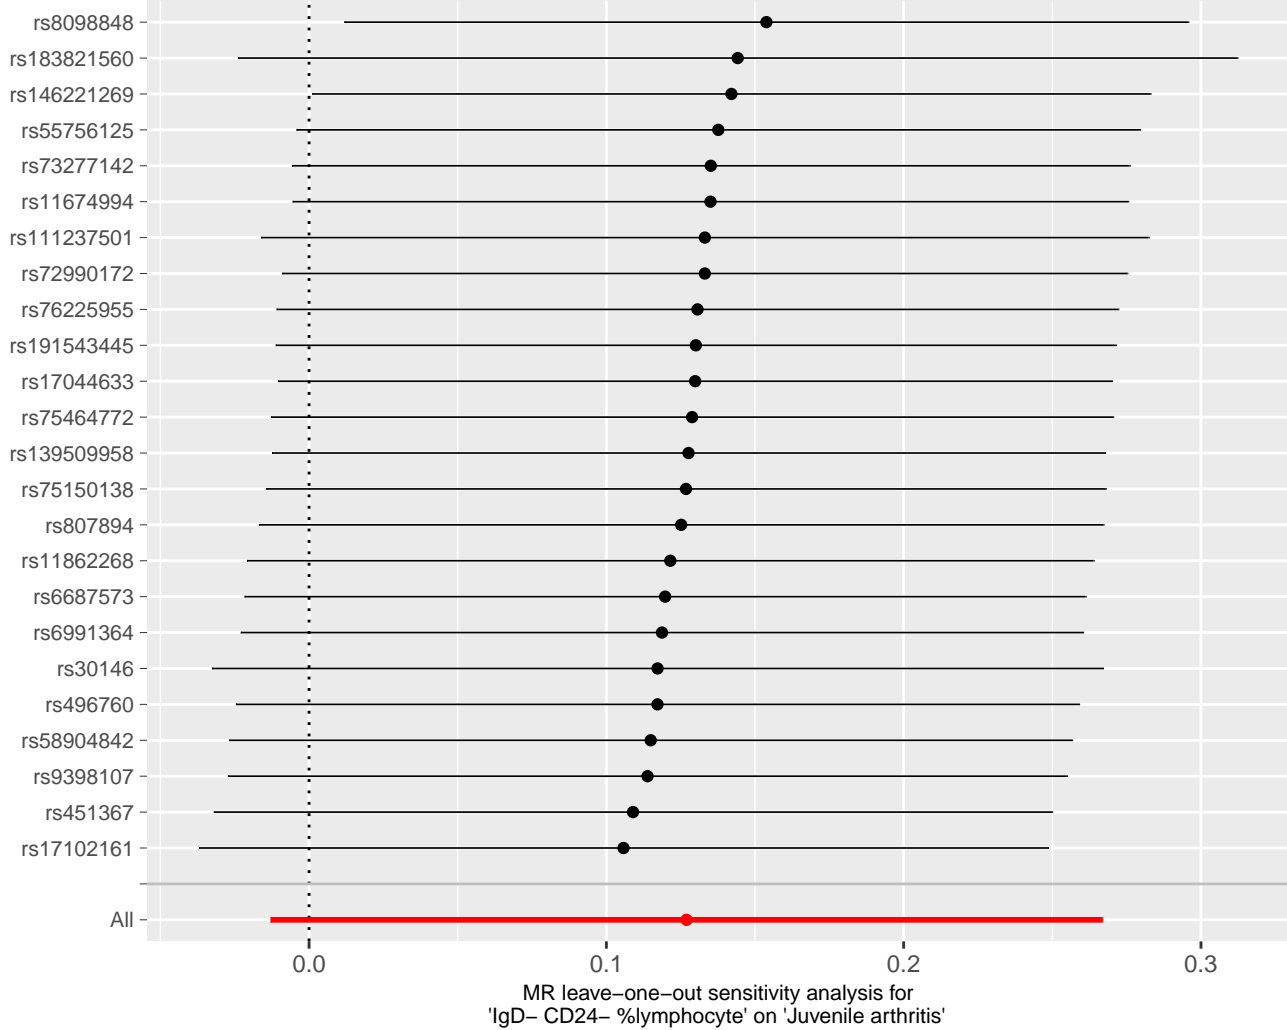

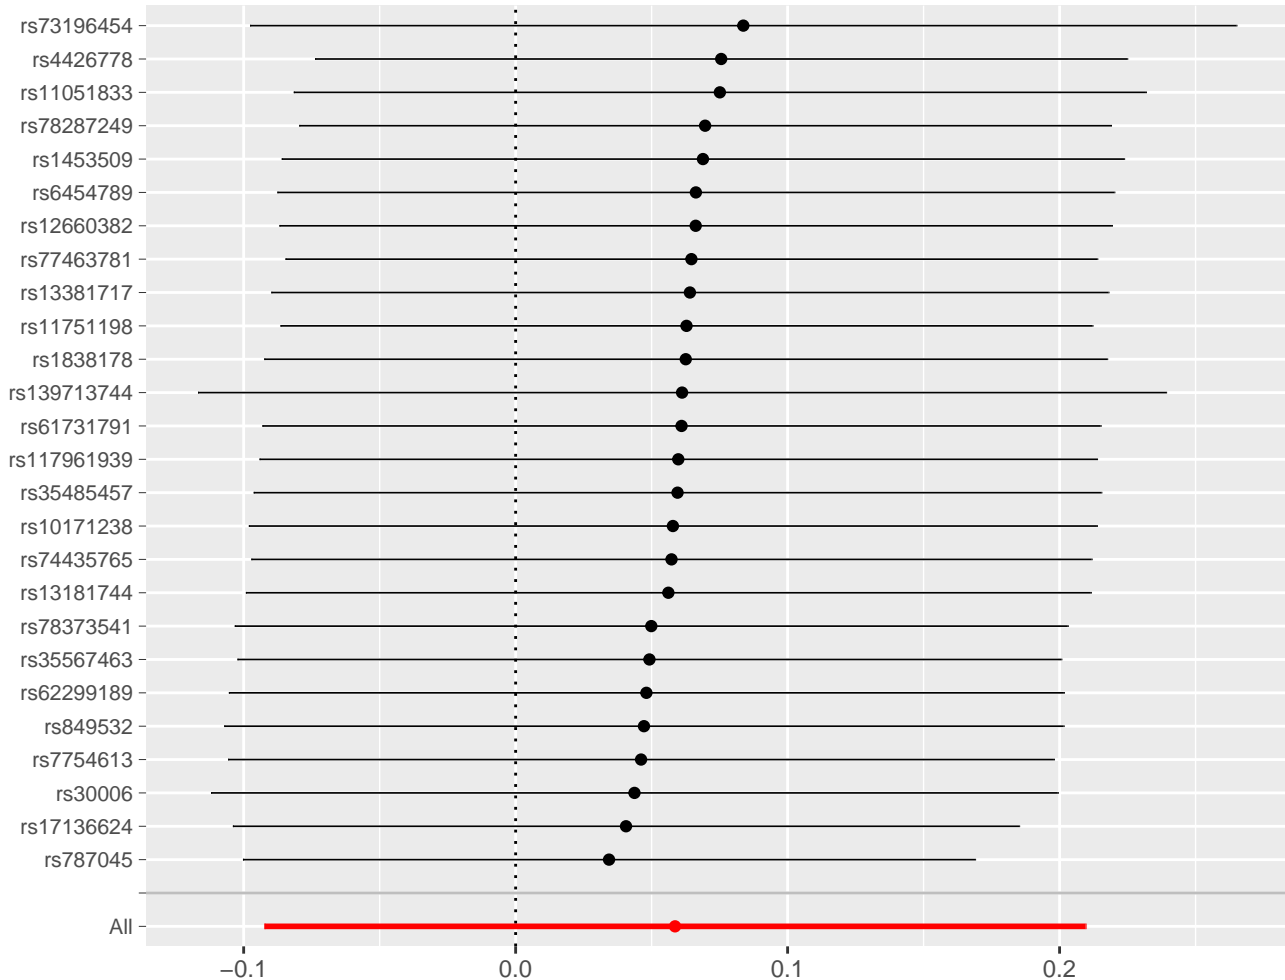

MR leave-one-out sensitivity analysis for 'CD20 on IgD- CD24-' on 'Juvenile arthritis'

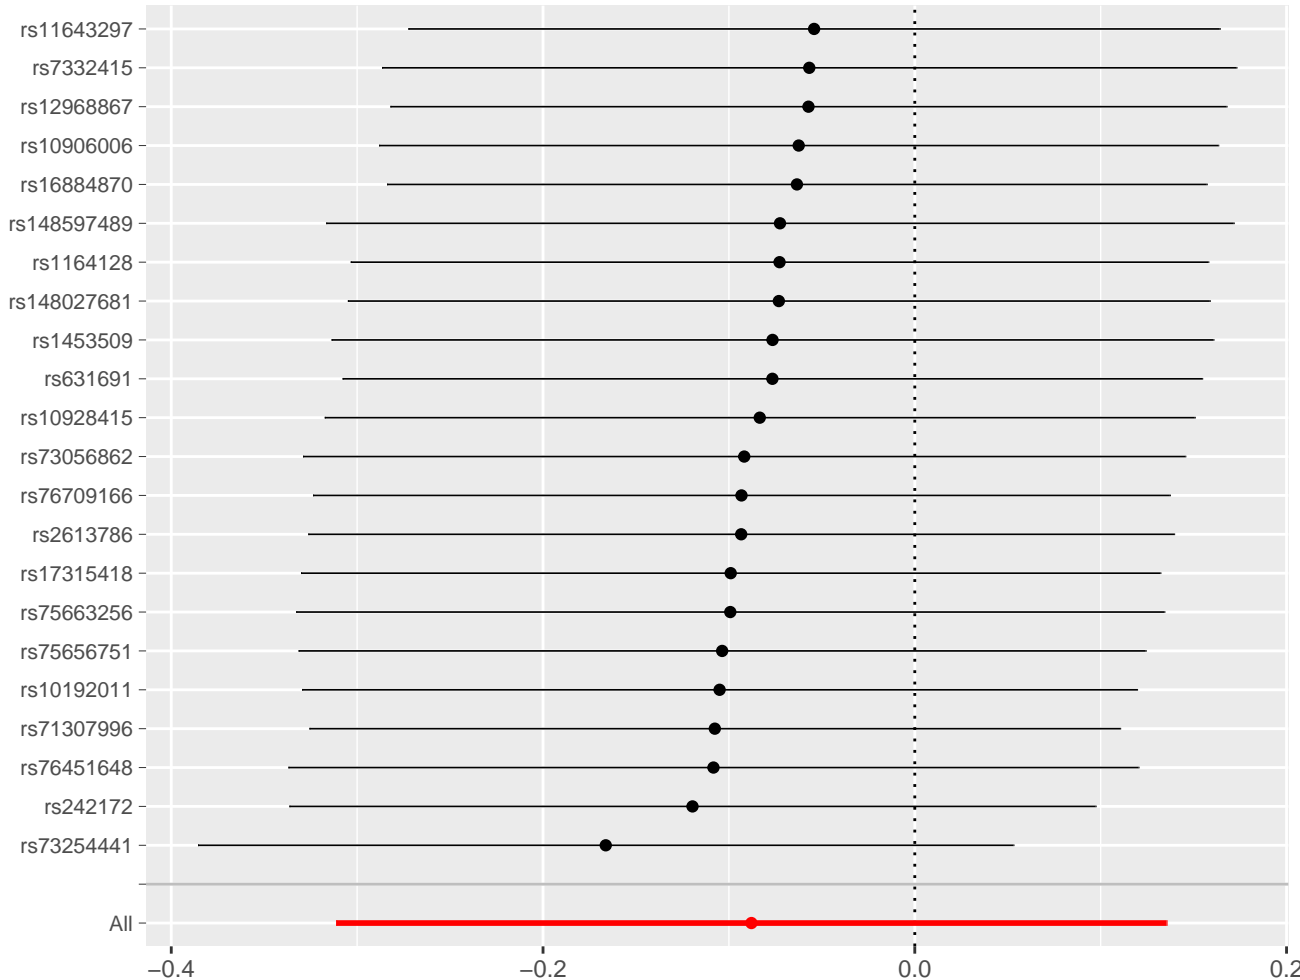

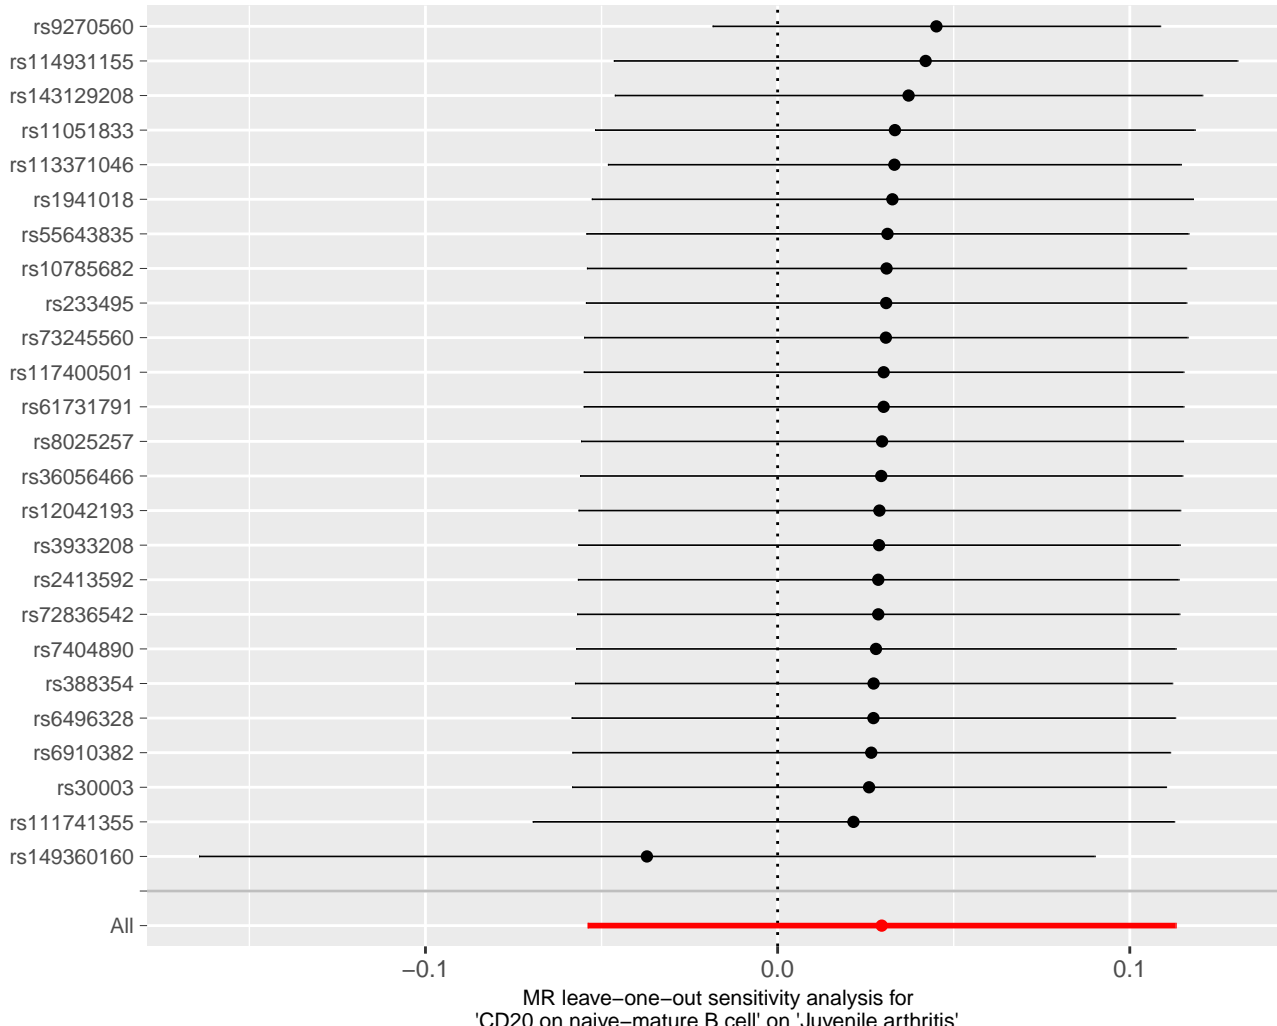



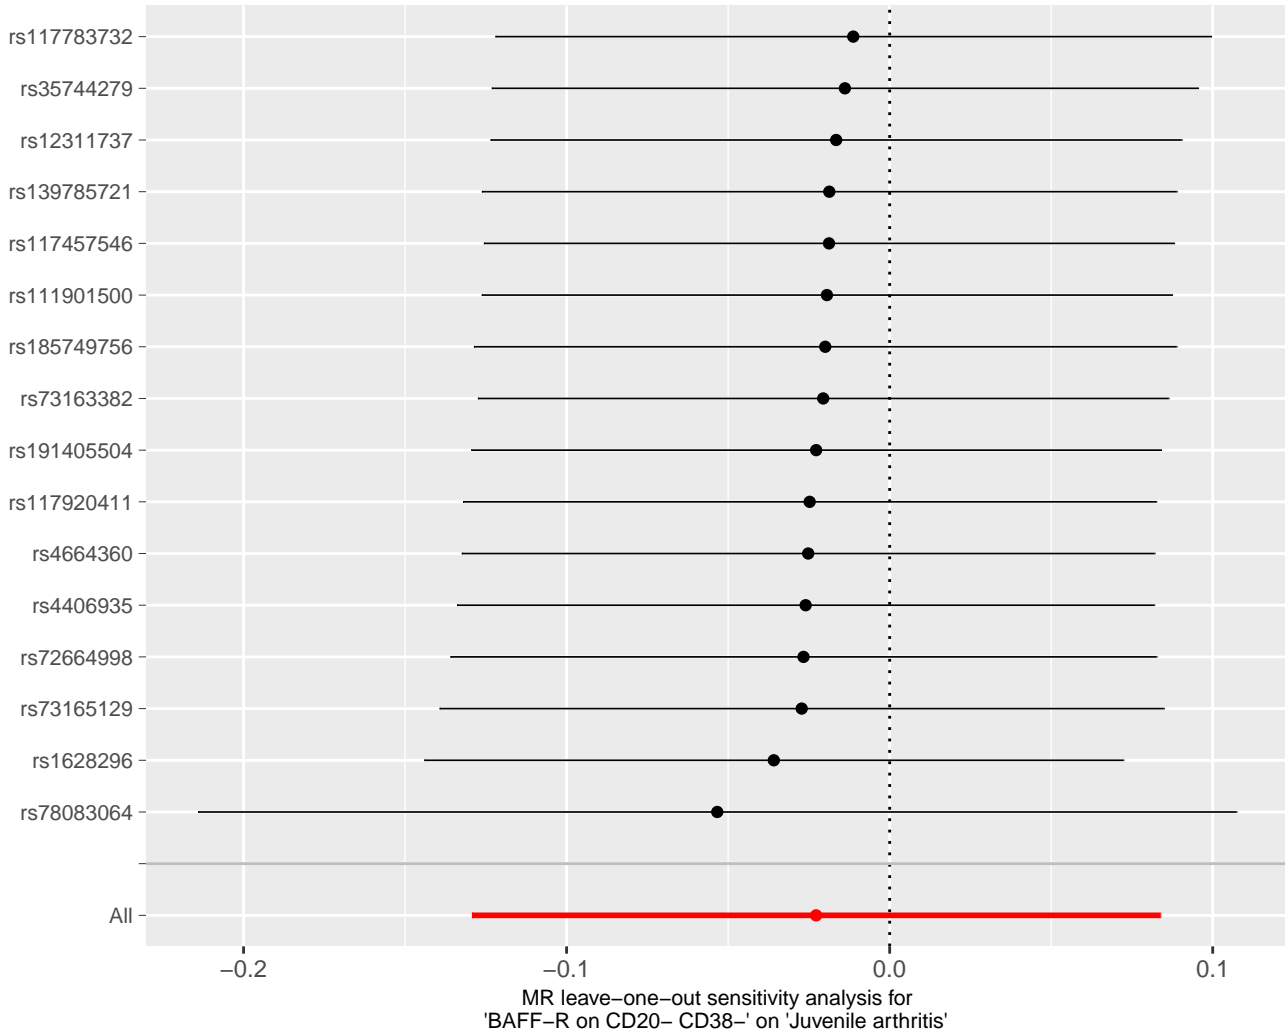

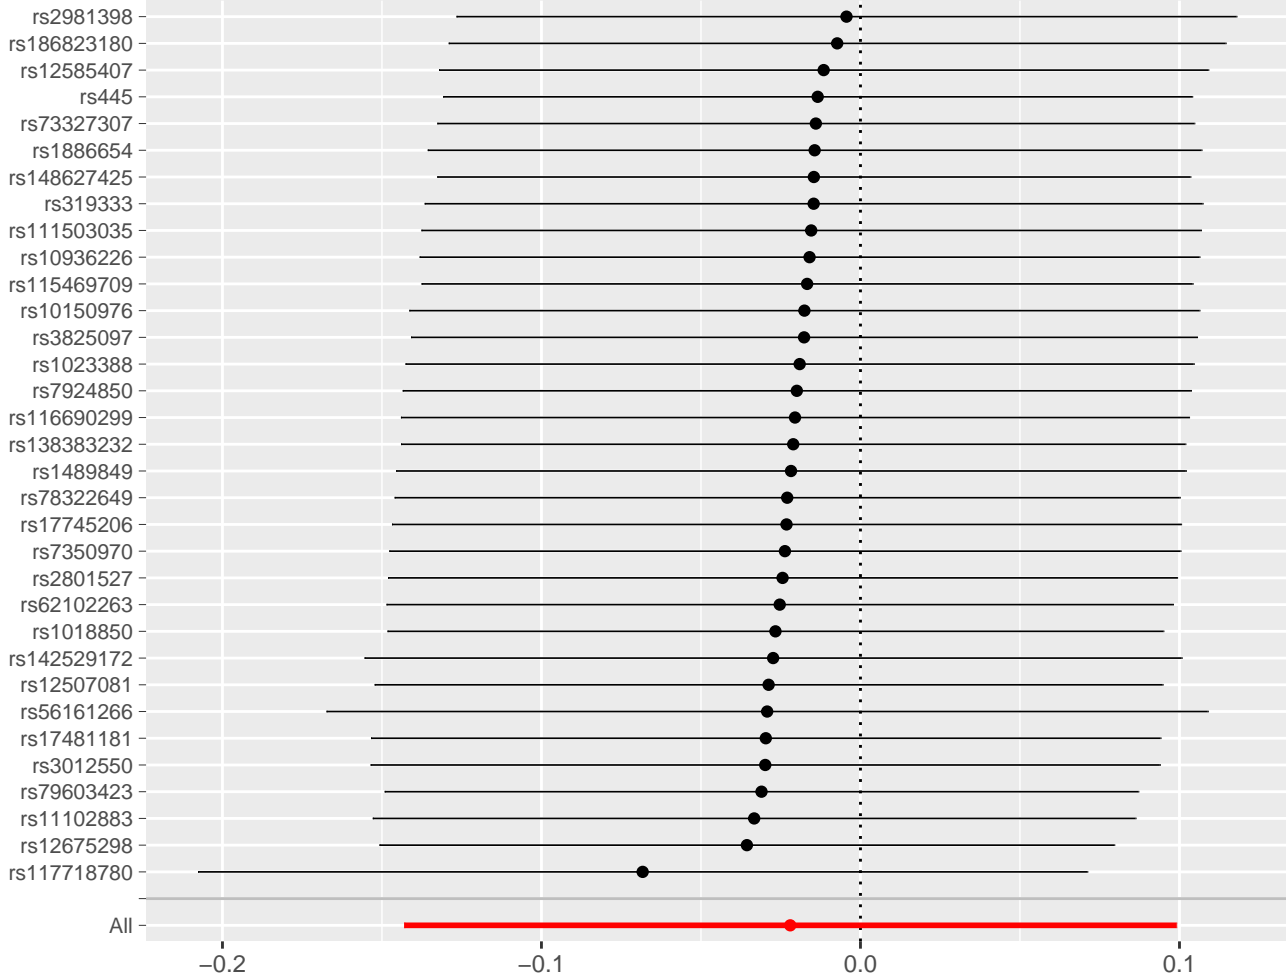

MR leave-one-out sensitivity analysis for 'CD80 on granulocyte' on 'Juvenile arthritis'

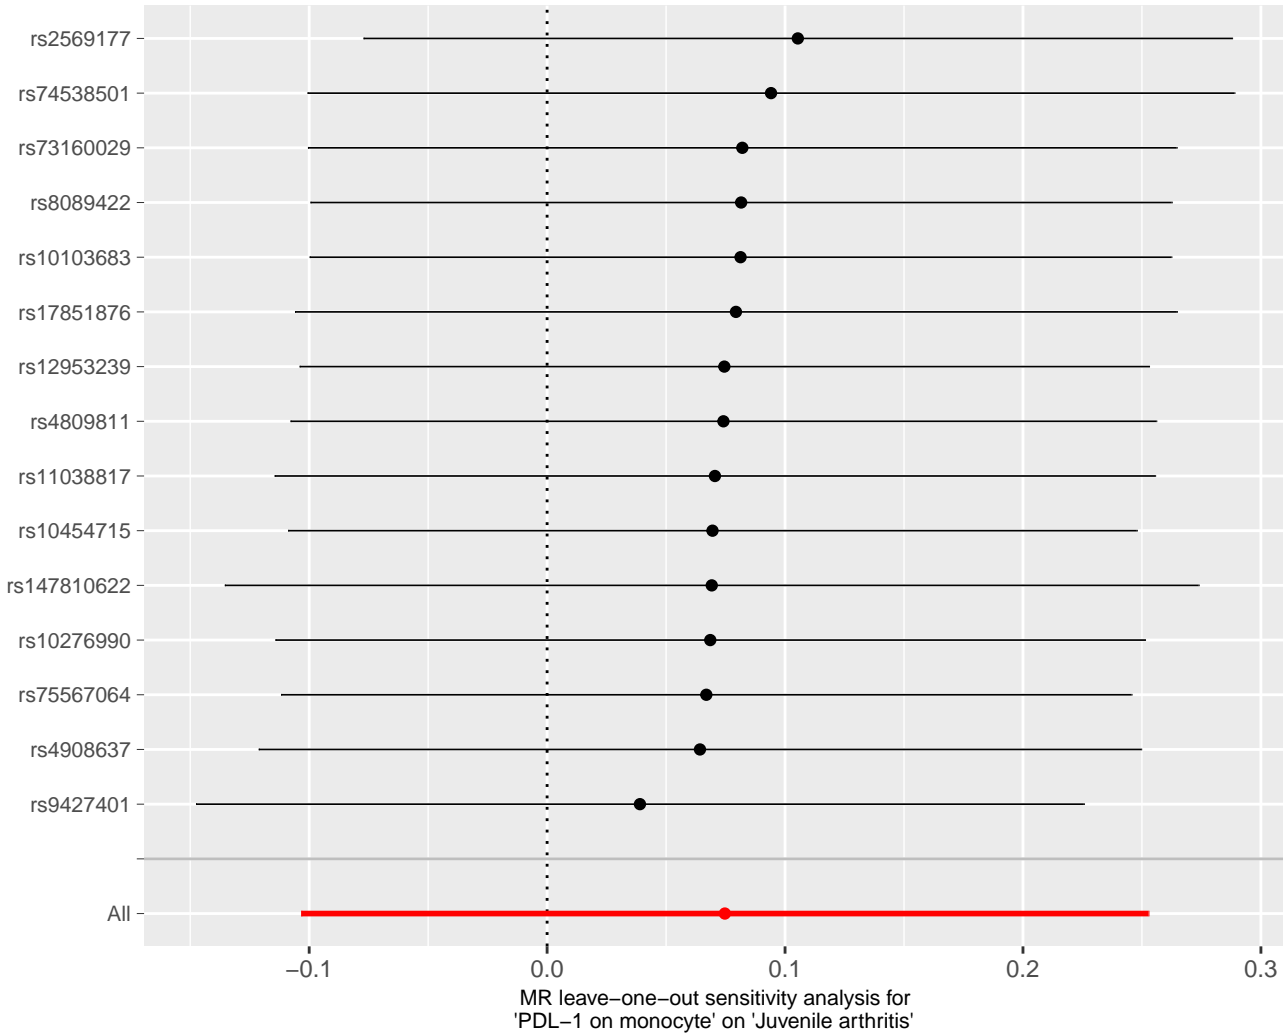

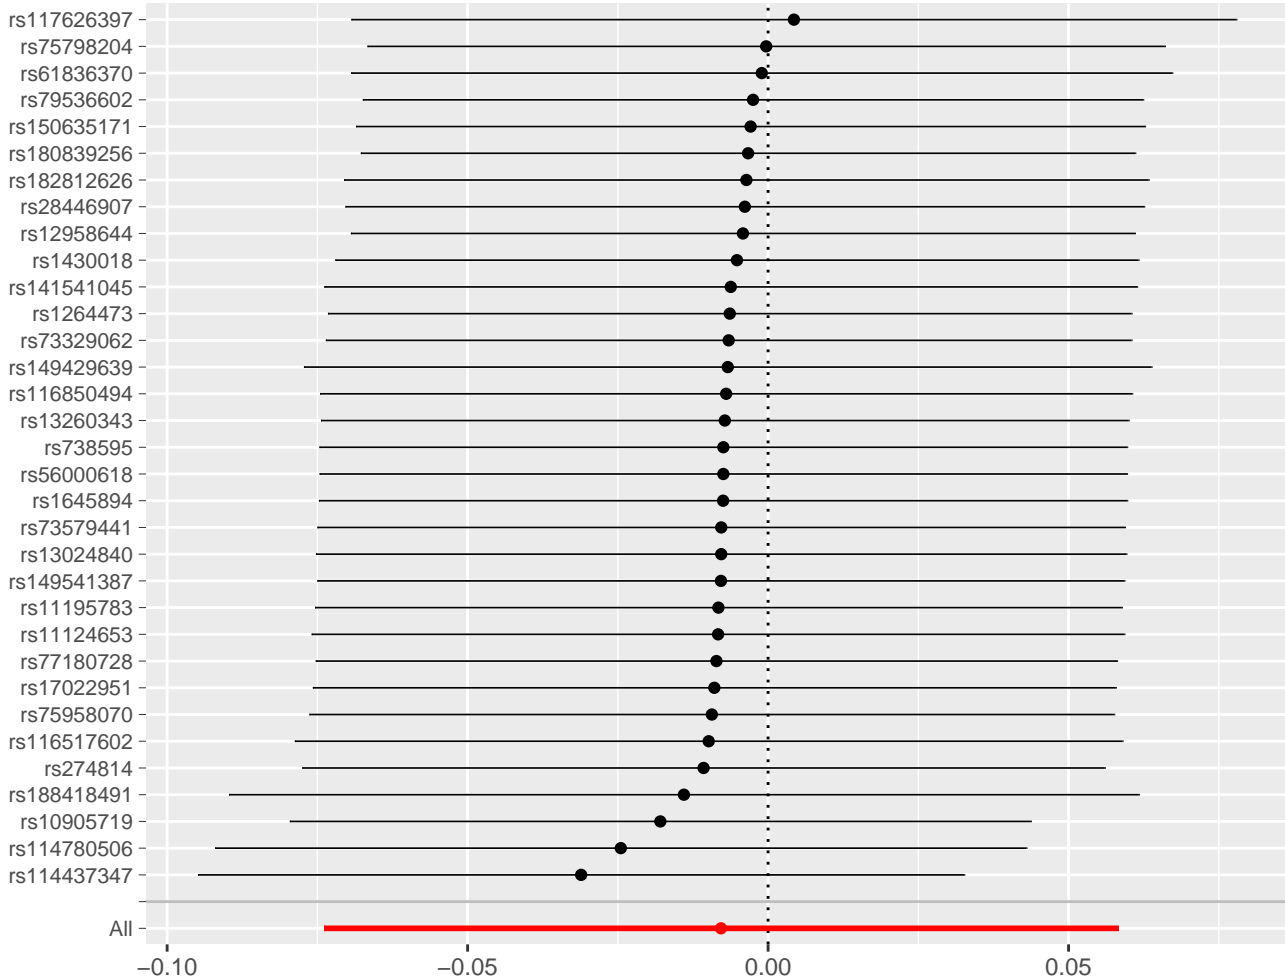

MR leave-one-out sensitivity analysis for 'CD25hi CD45RA+ CD4 not Treg %CD4+' on 'Juvenile arthritis'

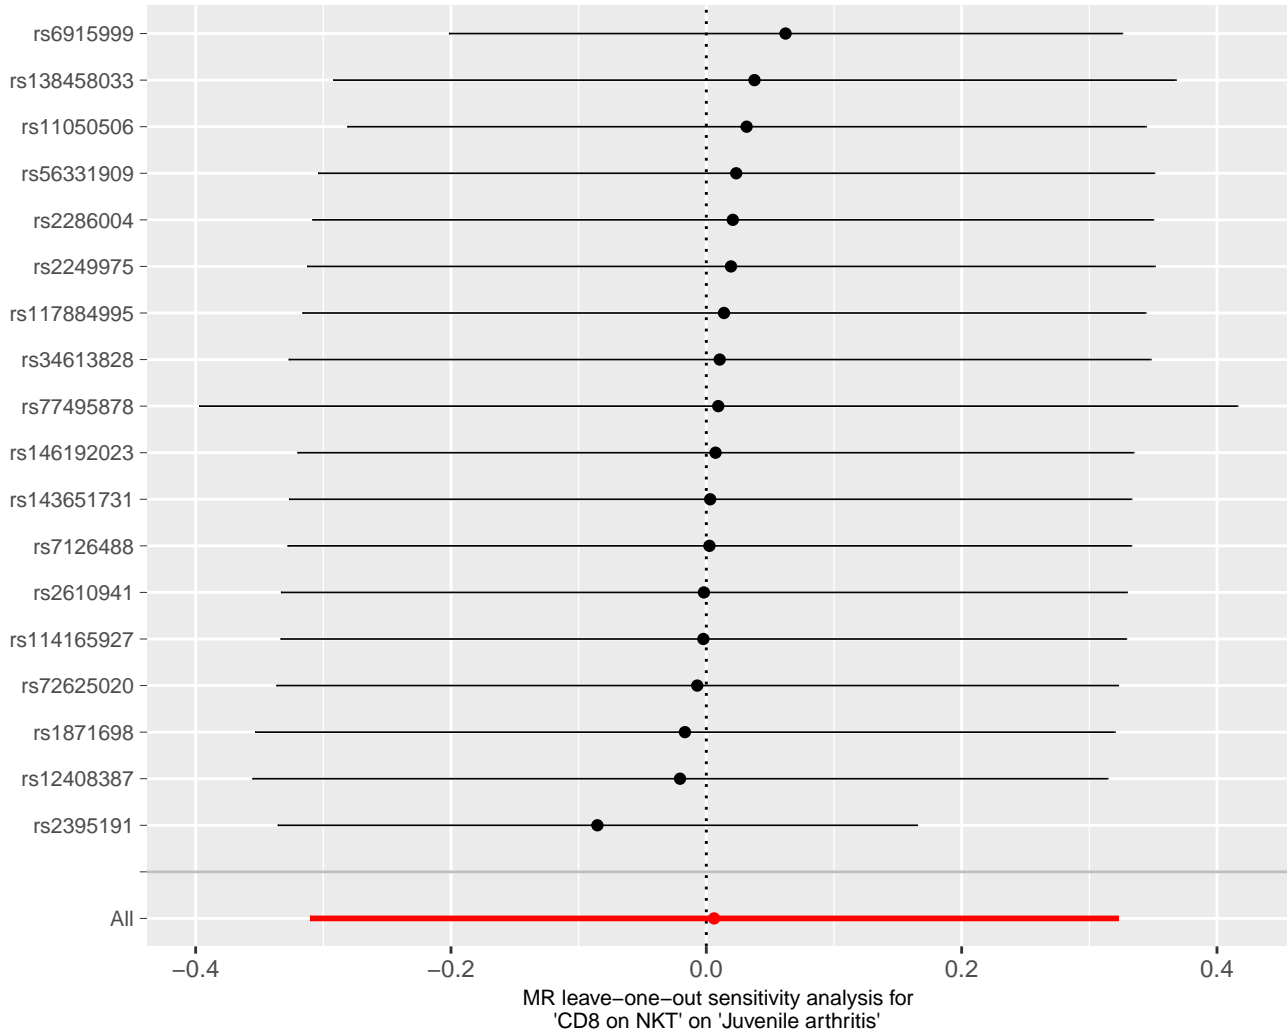

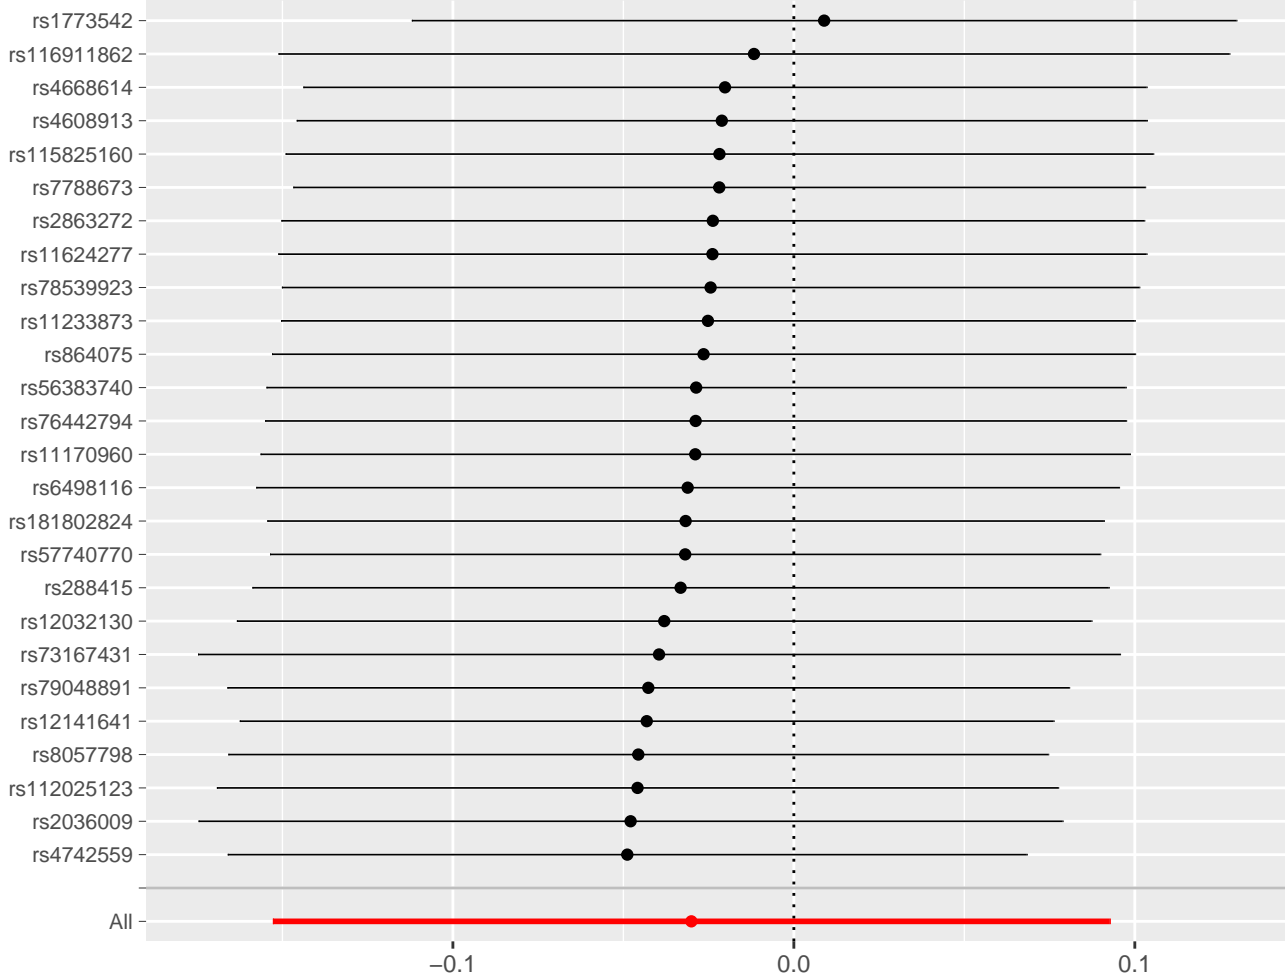

MR leave-one-out sensitivity analysis for 'CD3 on HLA DR+ CD8br' on 'Juvenile arthritis'

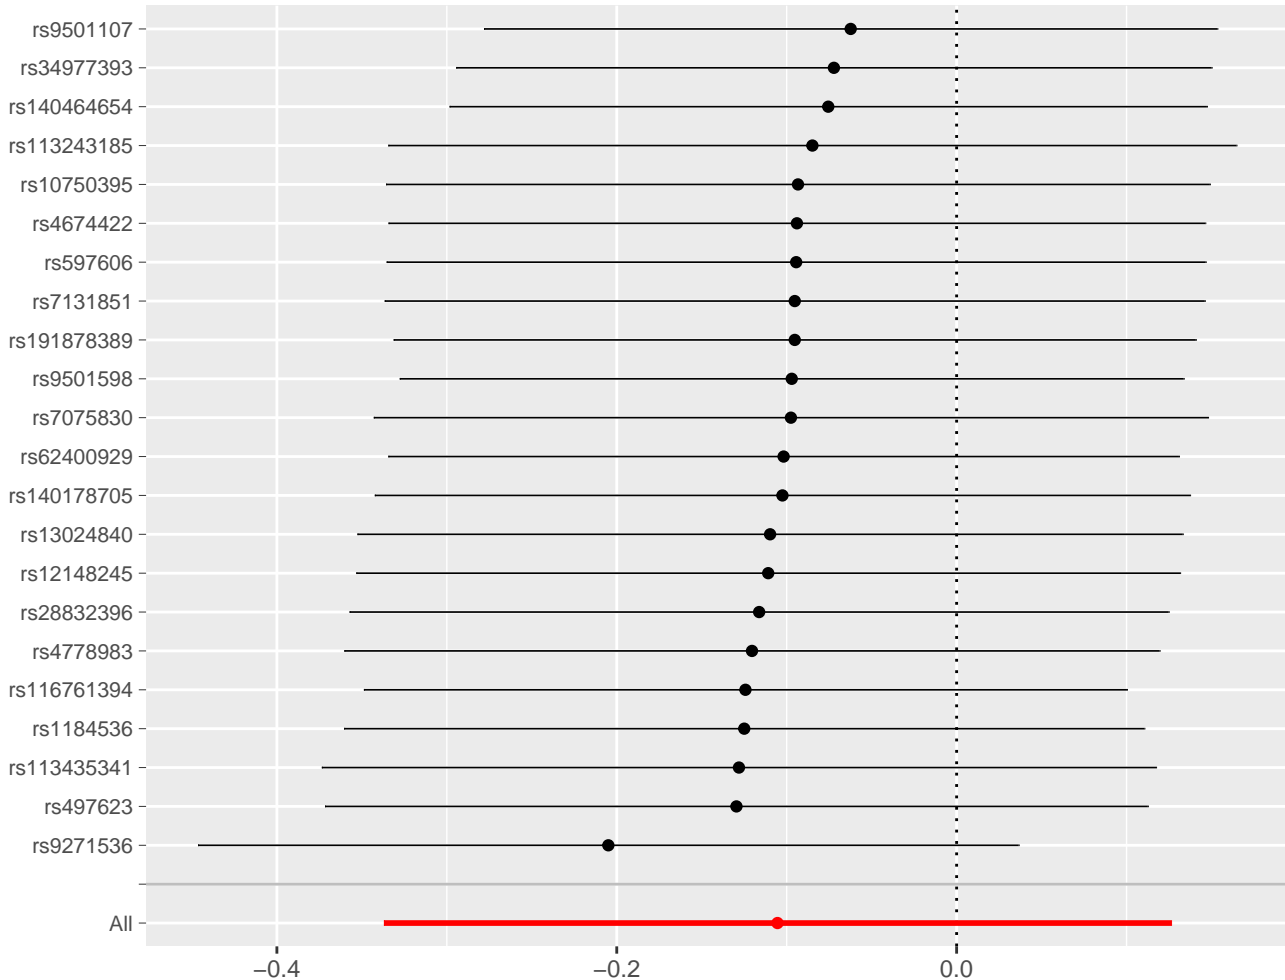

MR leave-one-out sensitivity analysis for 'TD CD4+ %CD4+' on 'Juvenile arthritis'

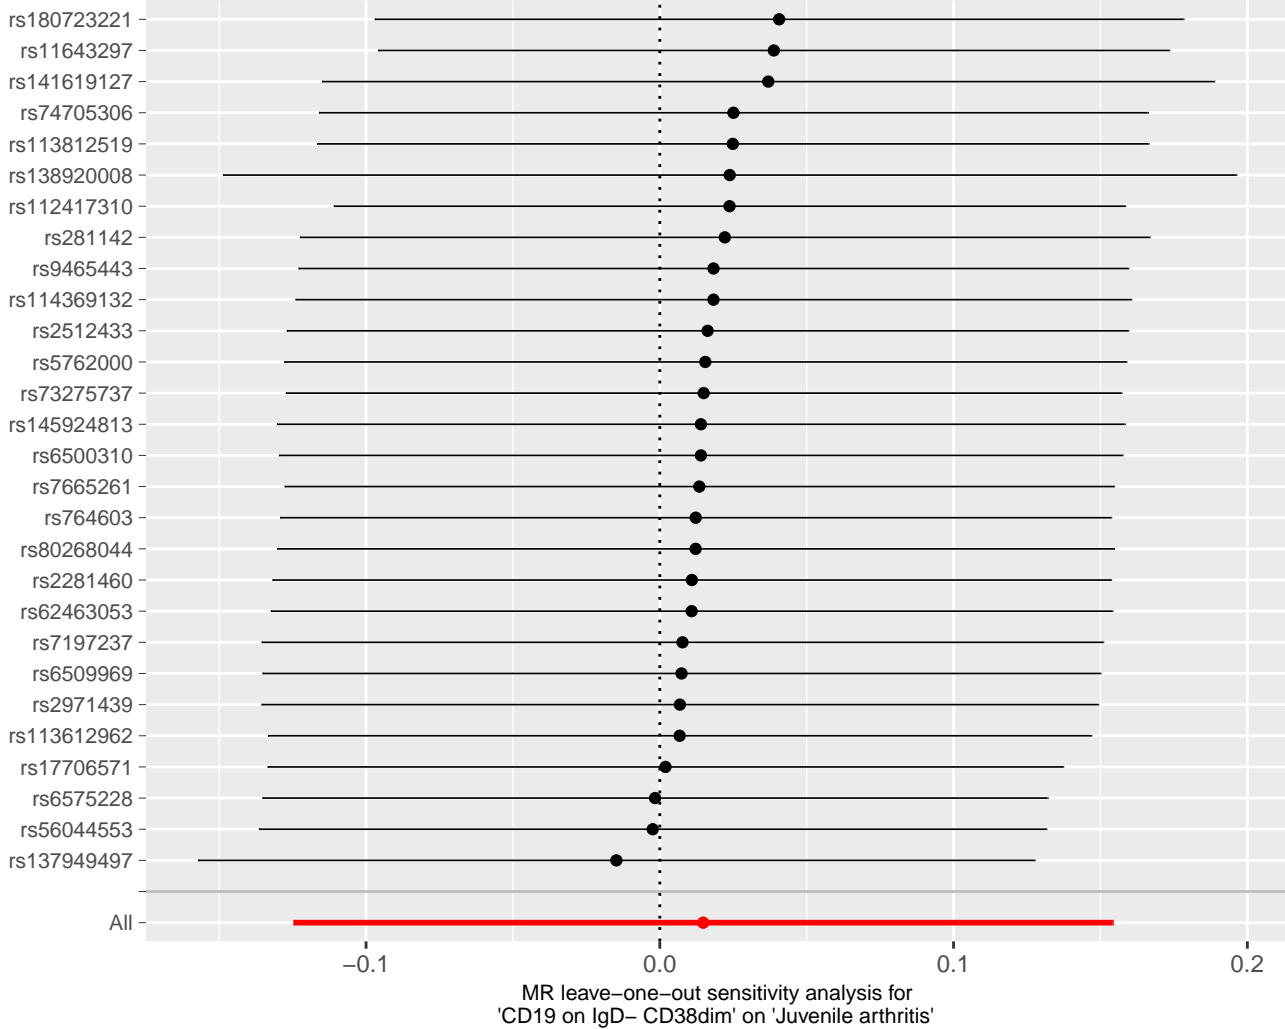



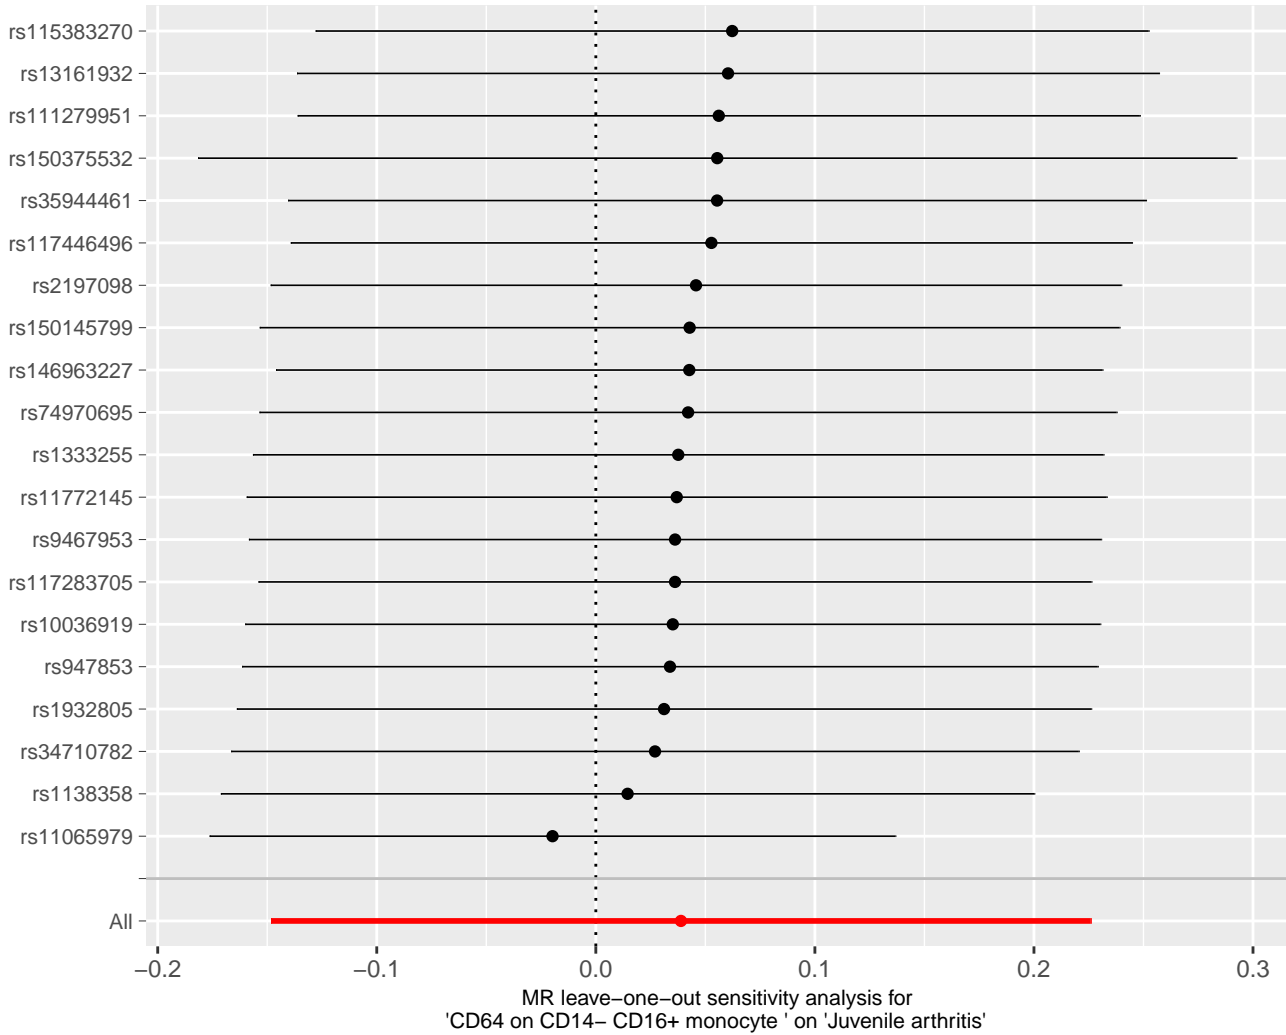

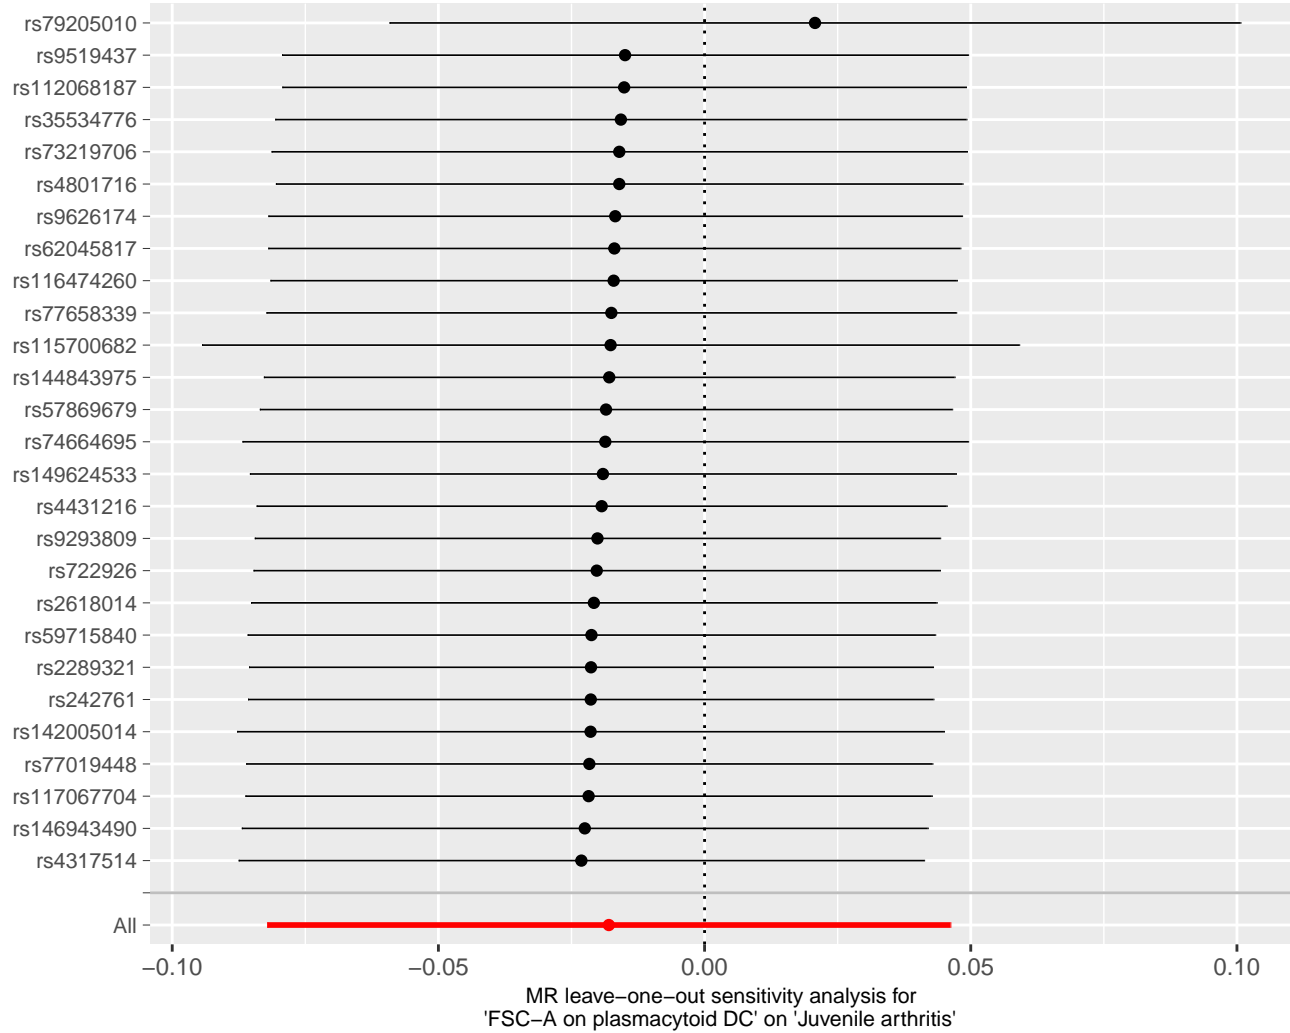

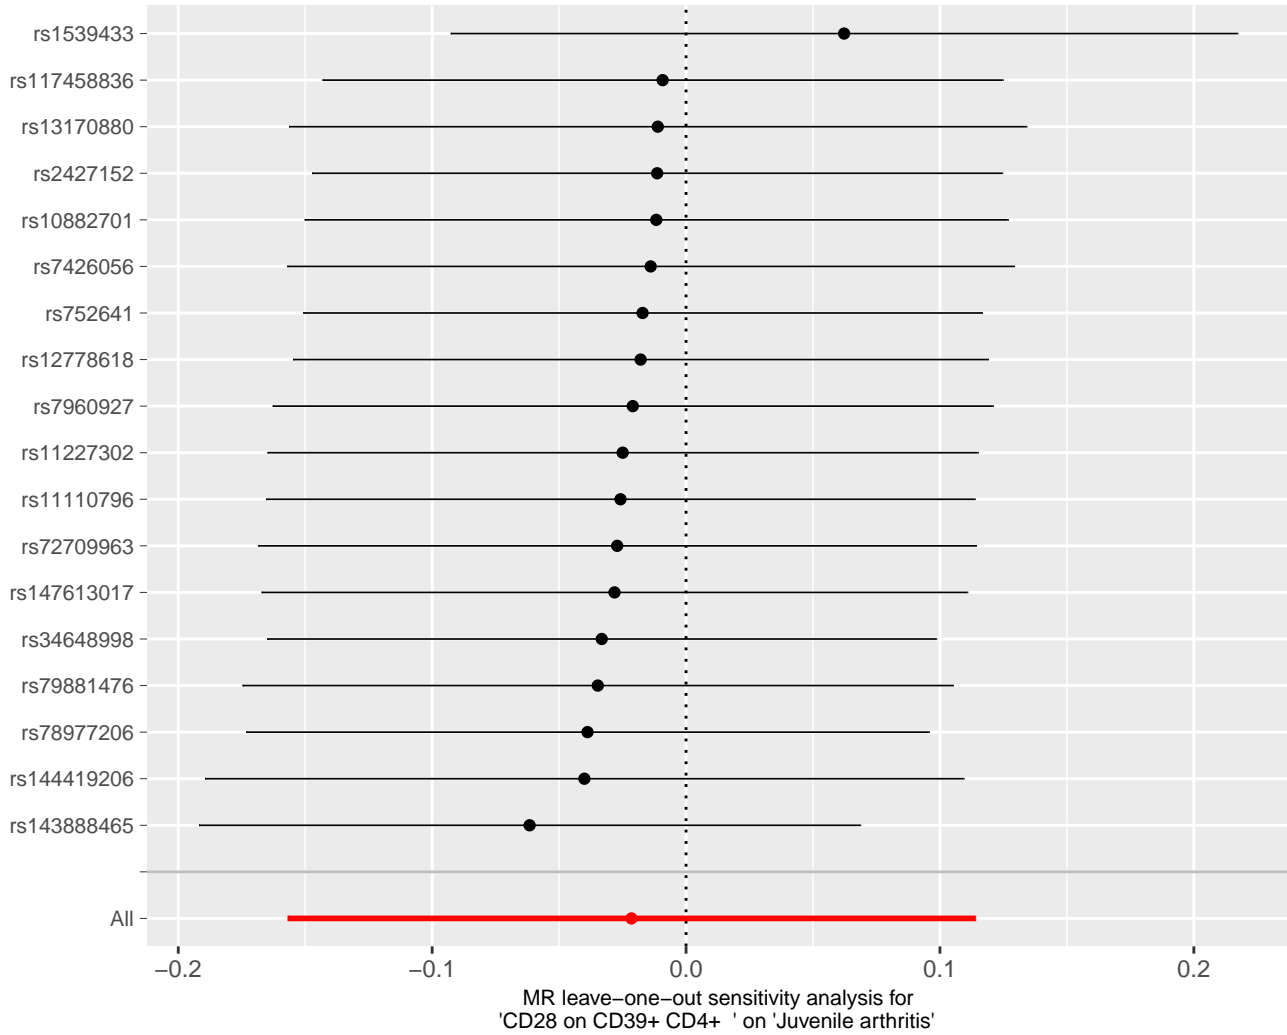

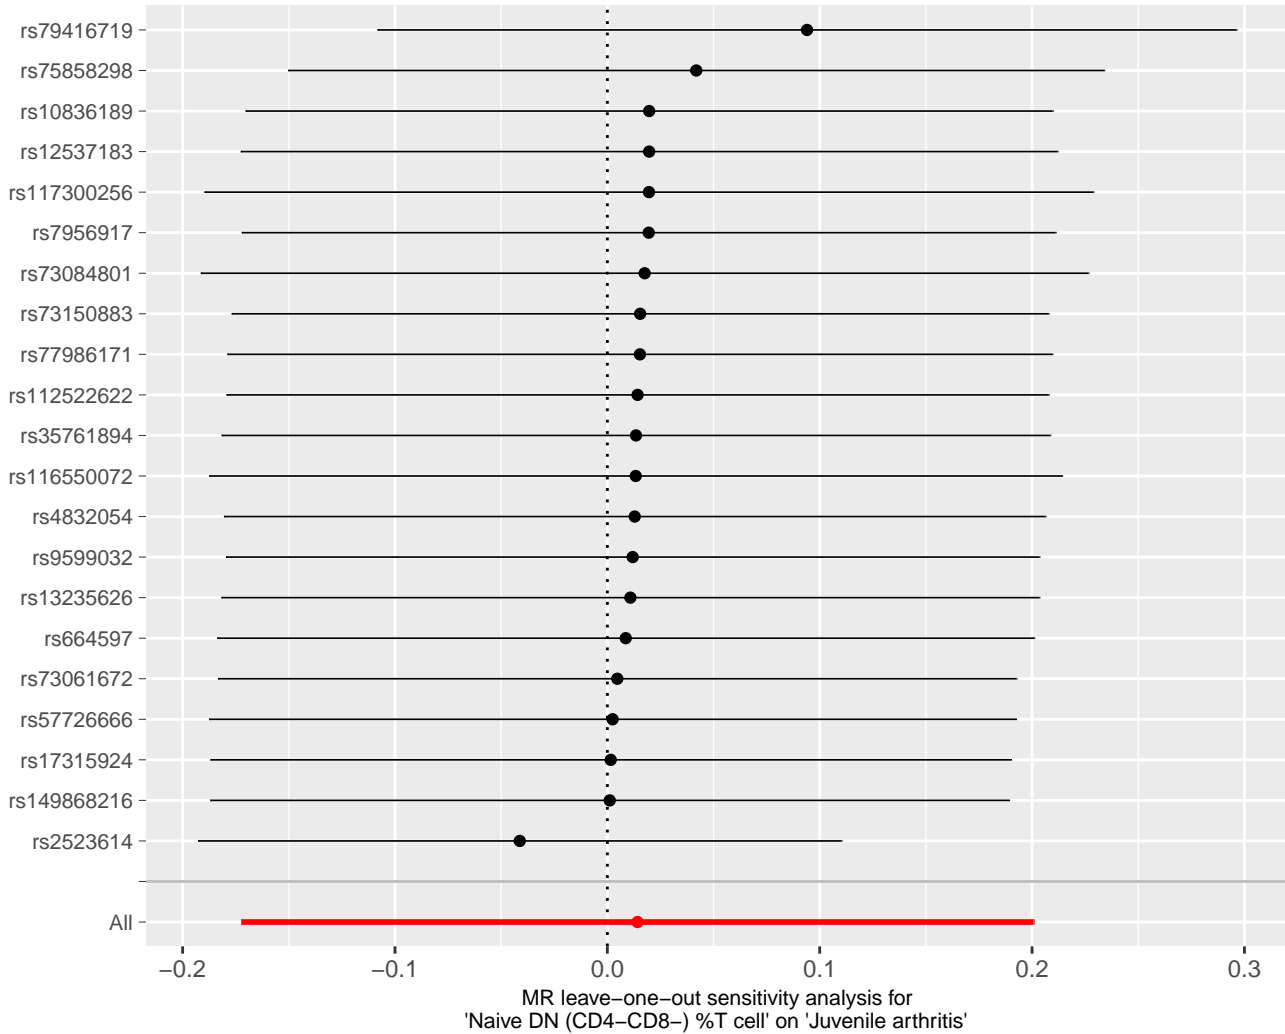

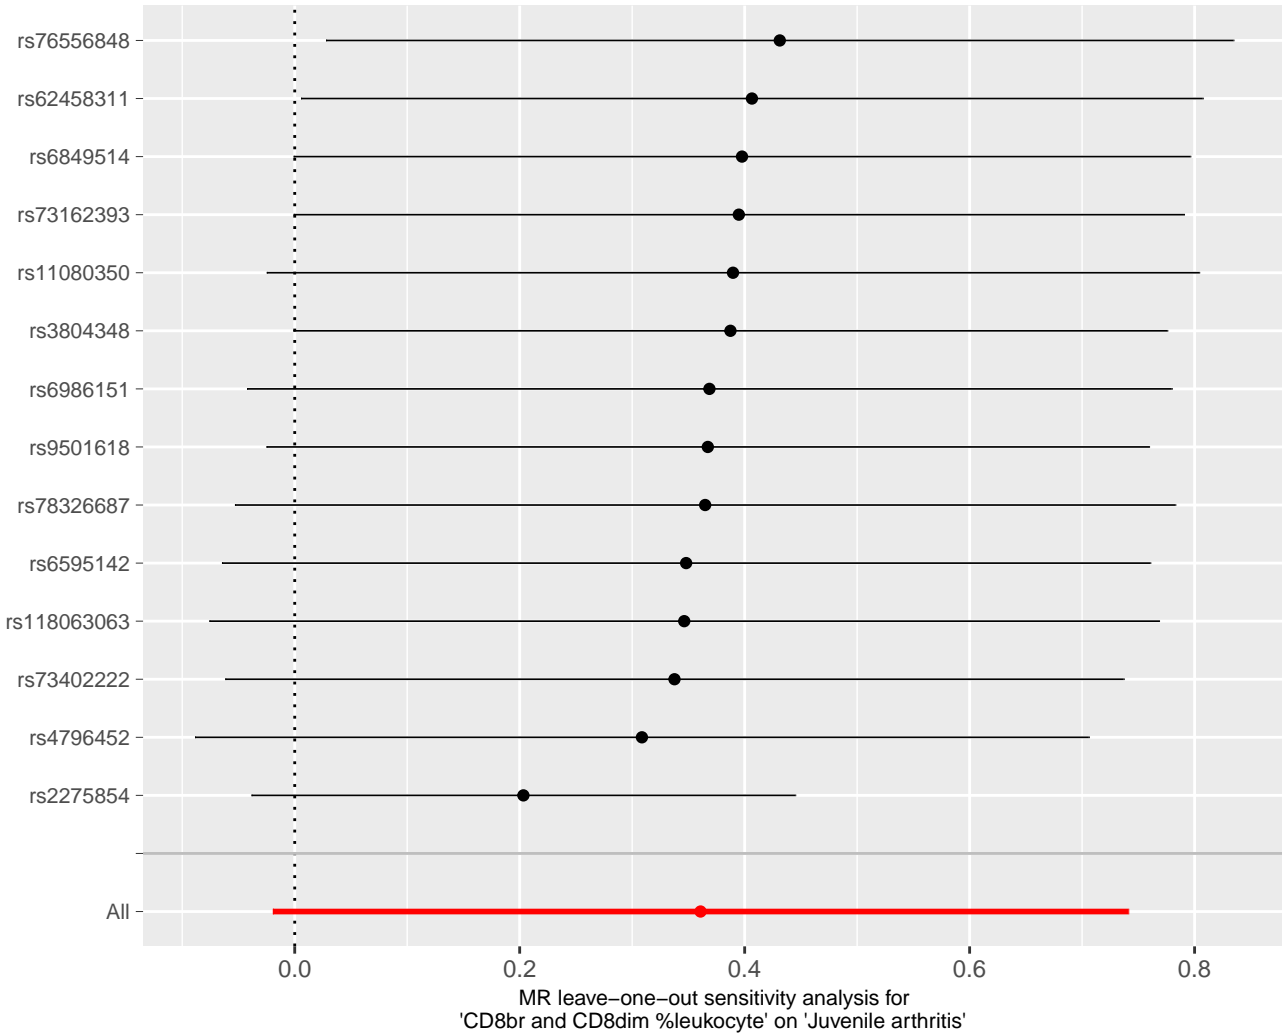

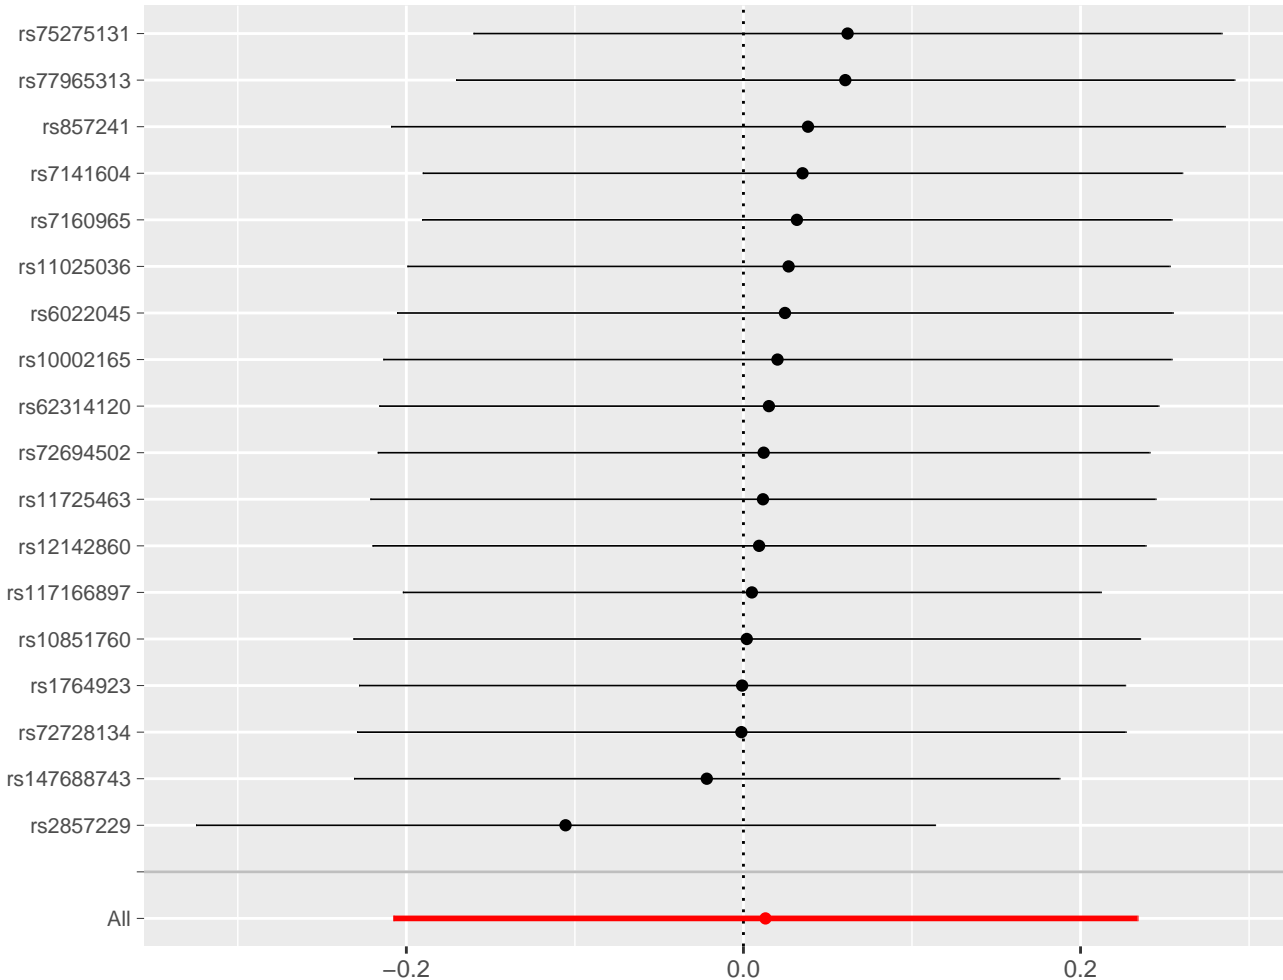

MR leave-one-out sensitivity analysis for 'DP (CD4+CD8+) AC' on 'Juvenile arthritis'

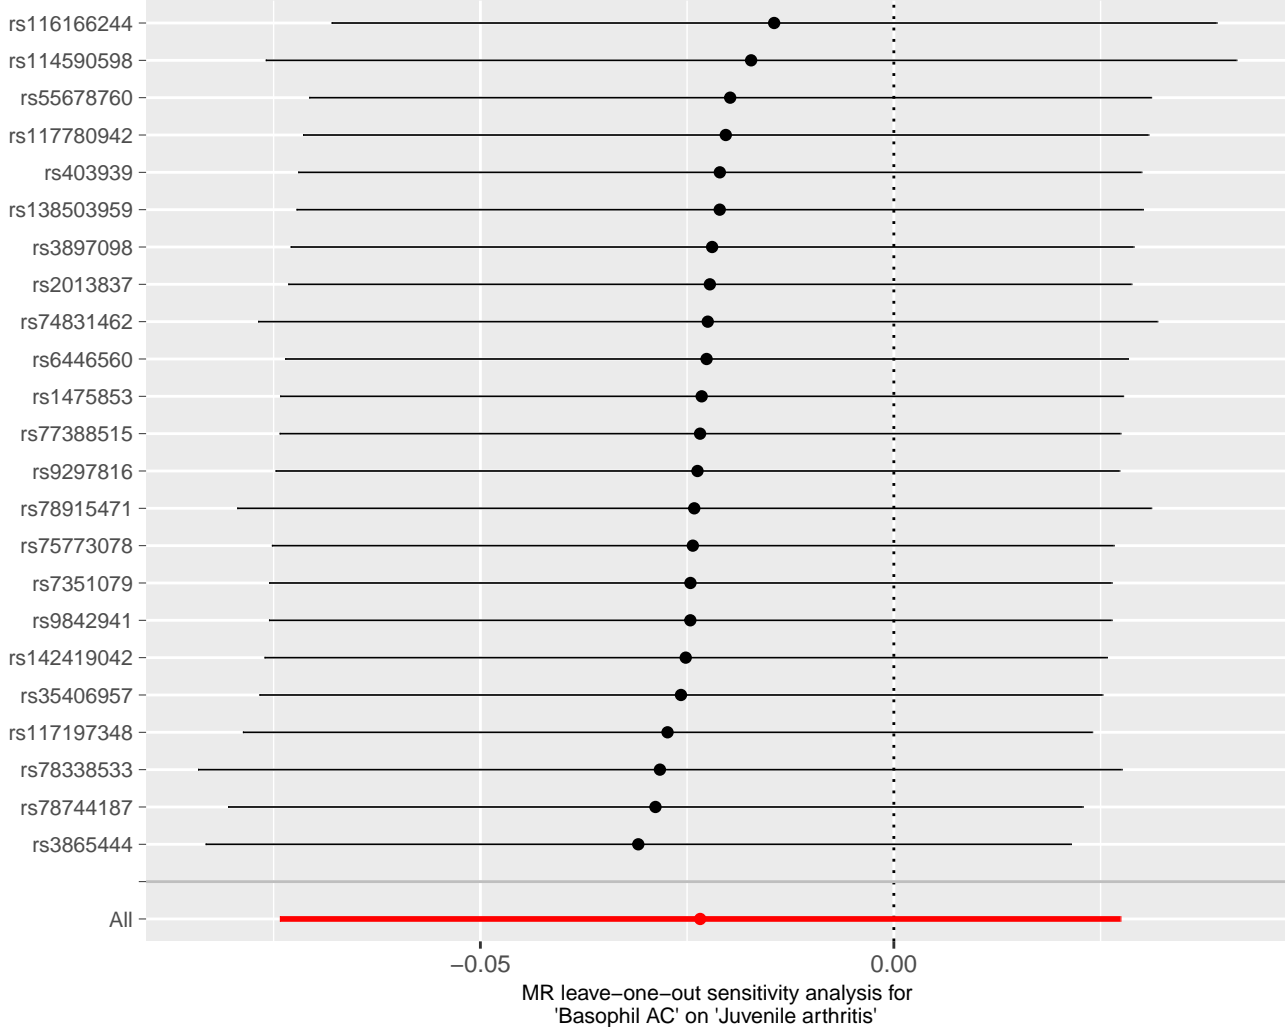

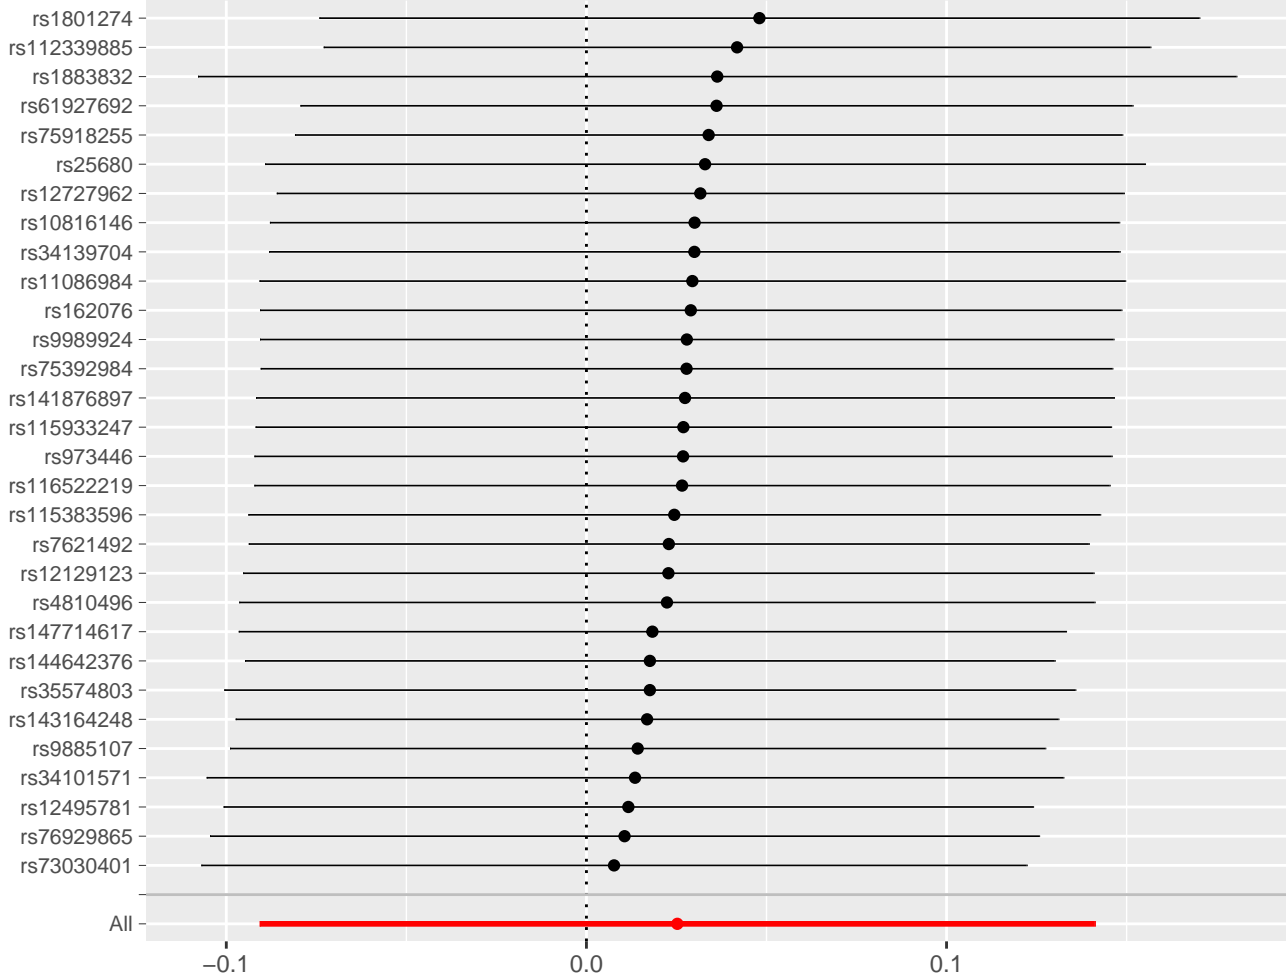

MR leave-one-out sensitivity analysis for 'CD27 on sw mem' on 'Juvenile arthritis'



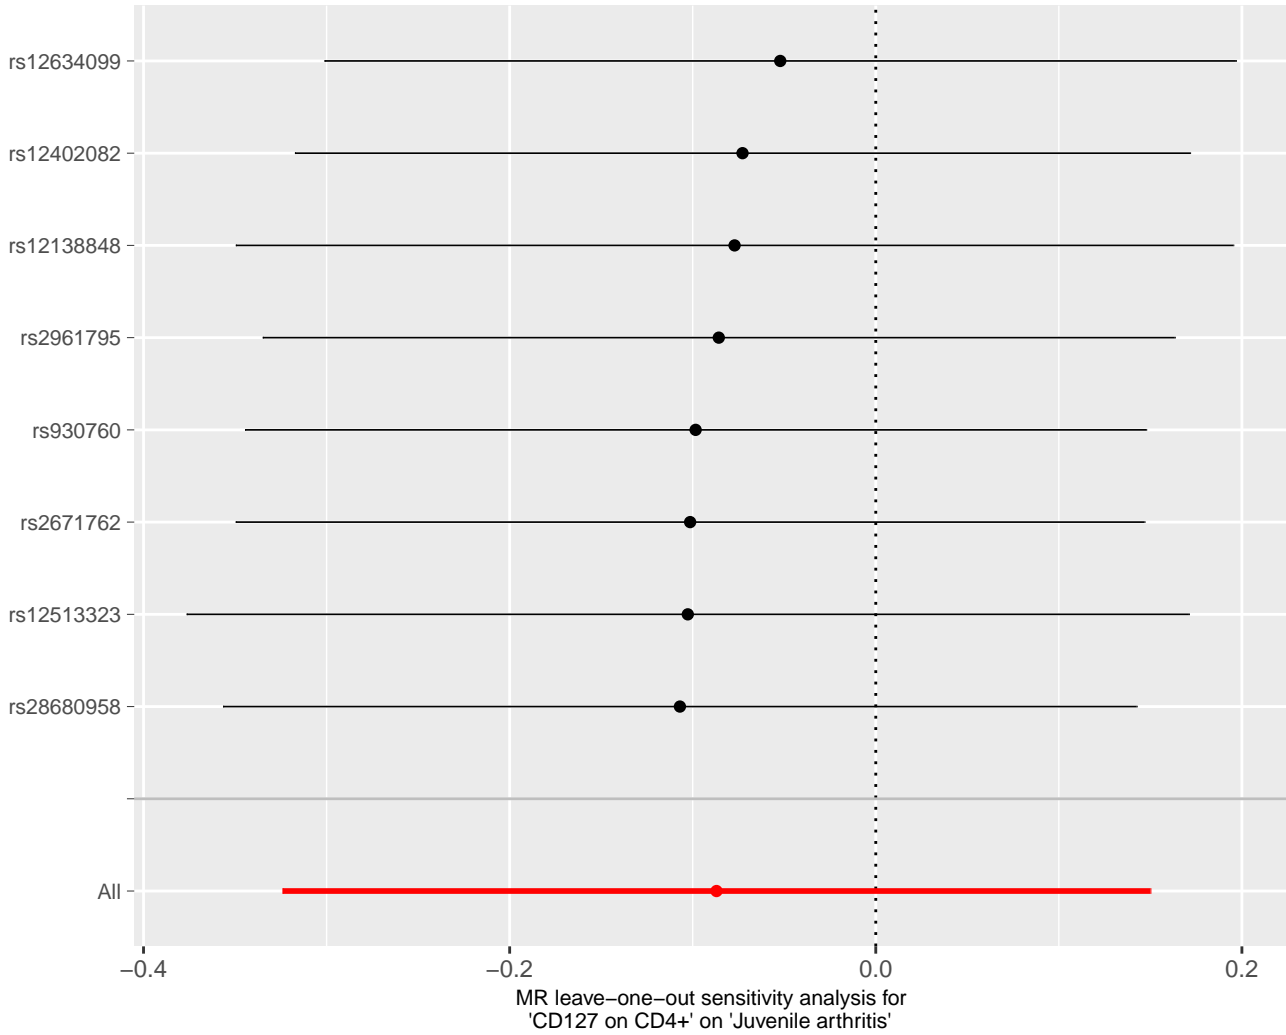

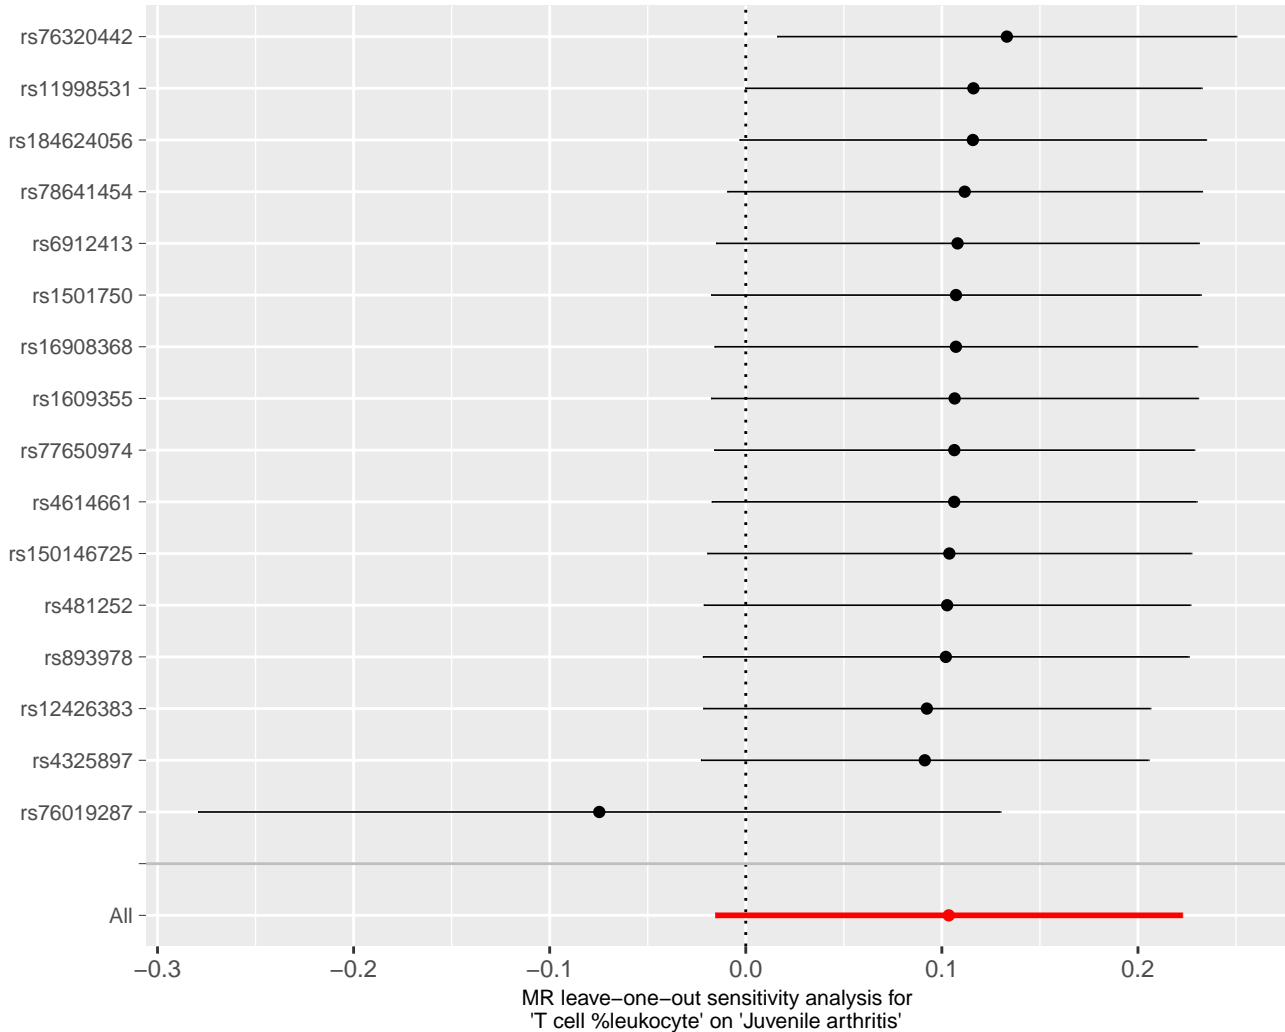

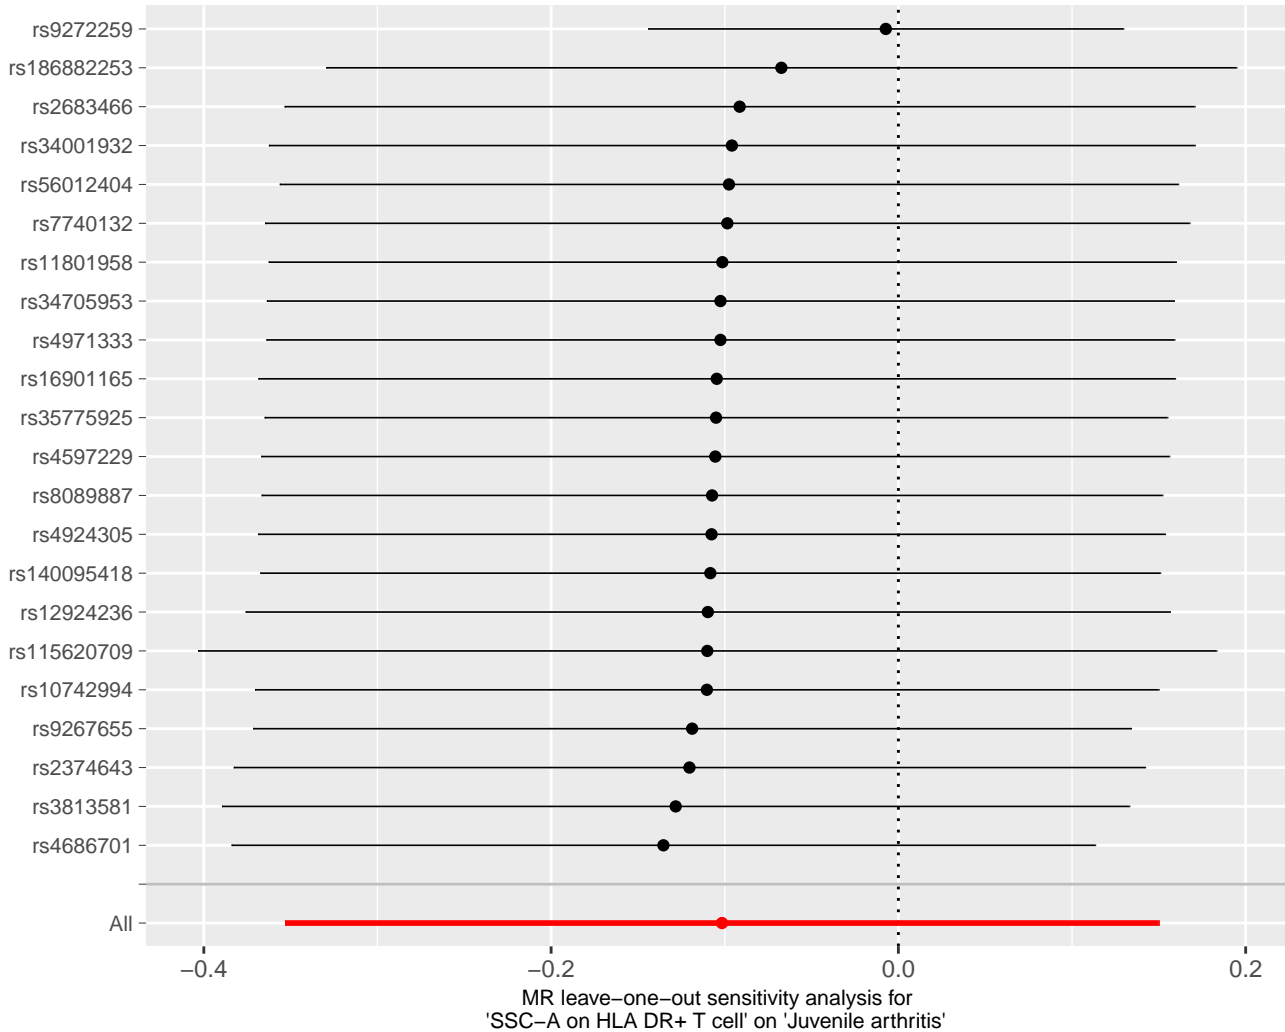

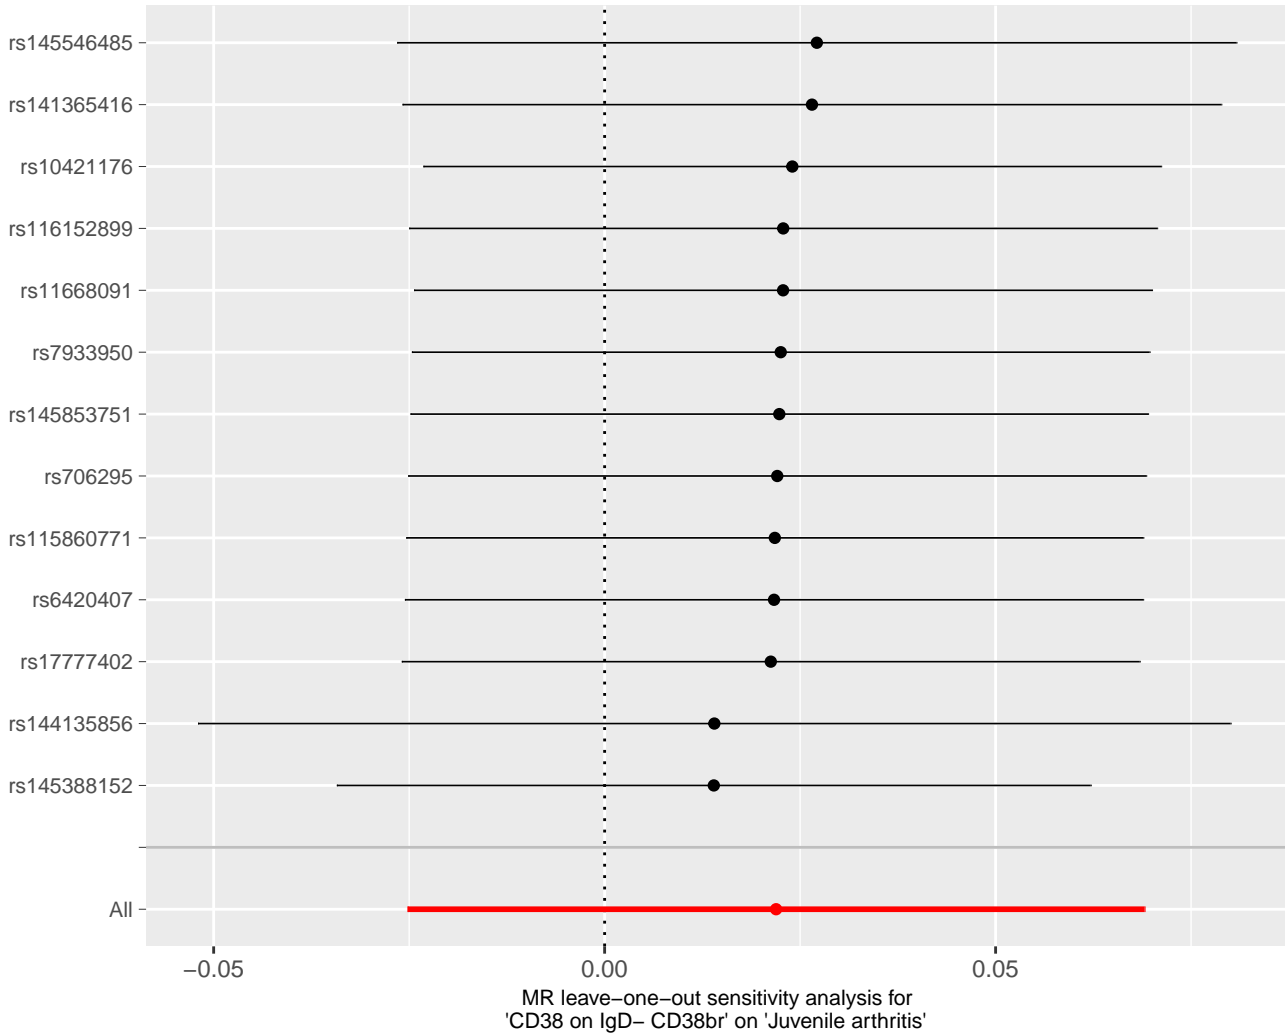

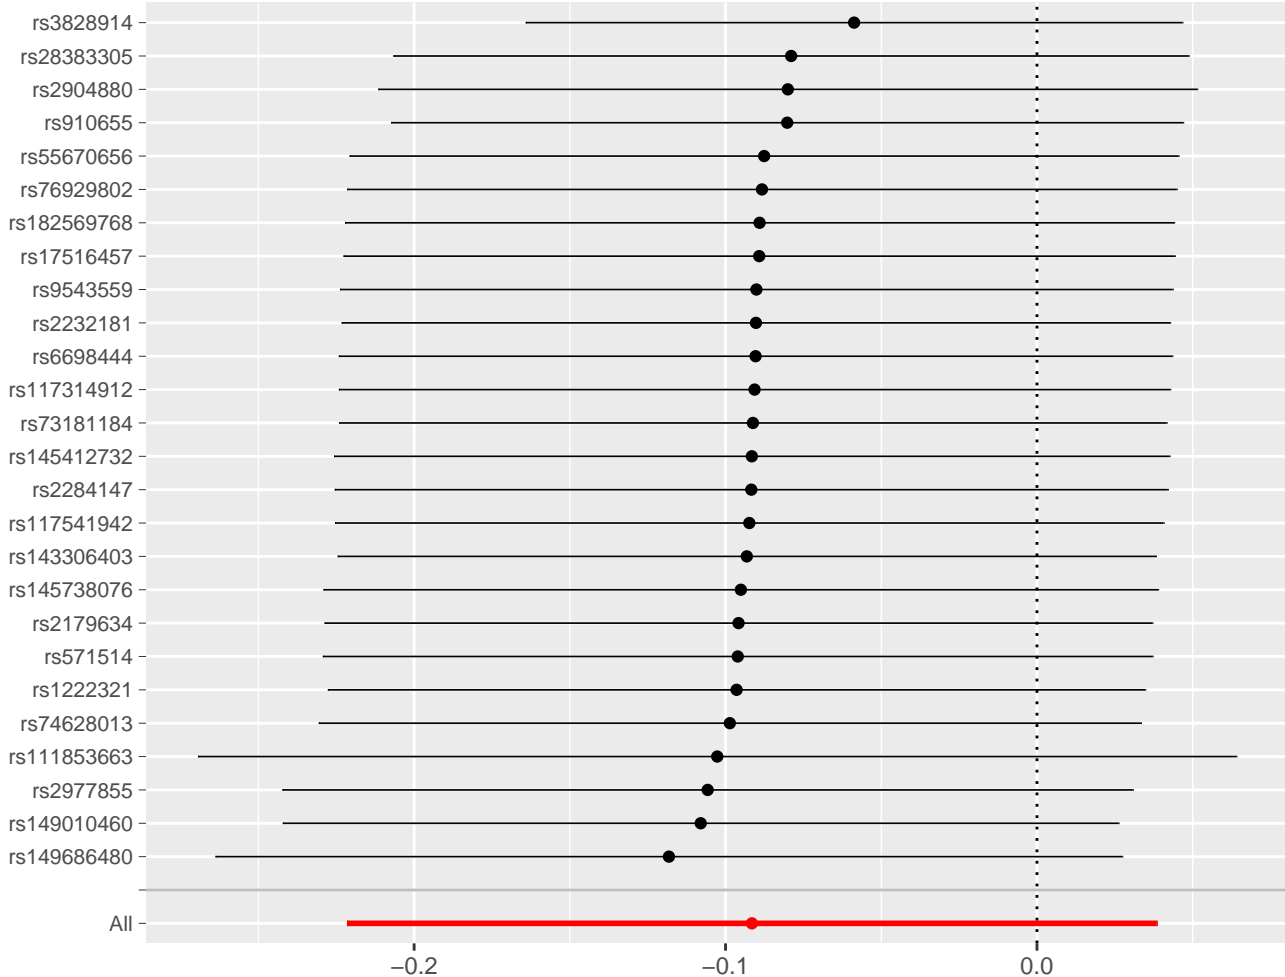

MR leave-one-out sensitivity analysis for 'CD19 on B cell' on 'Juvenile arthritis'

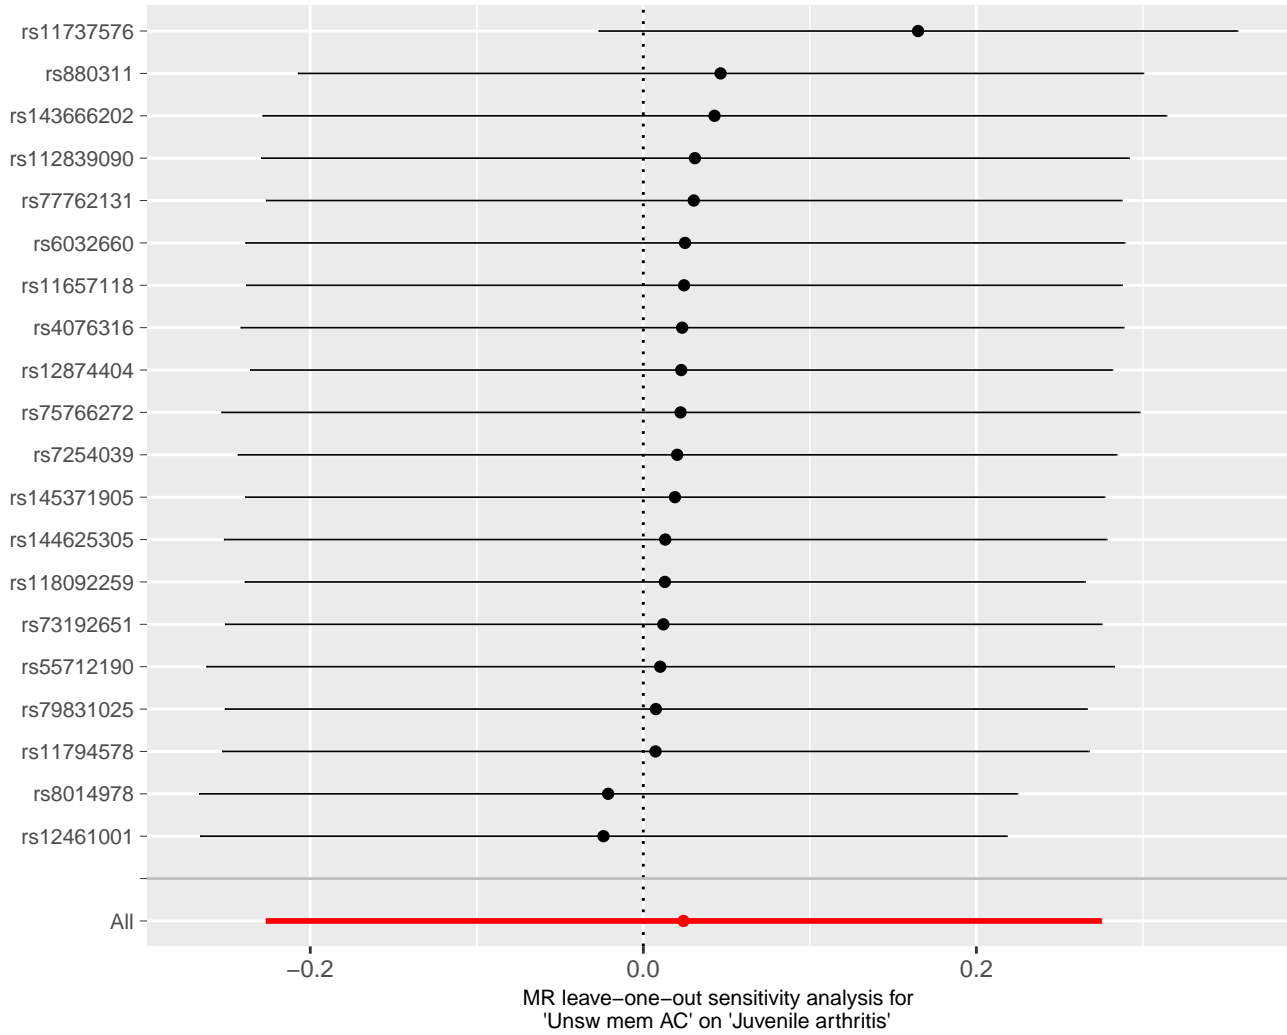

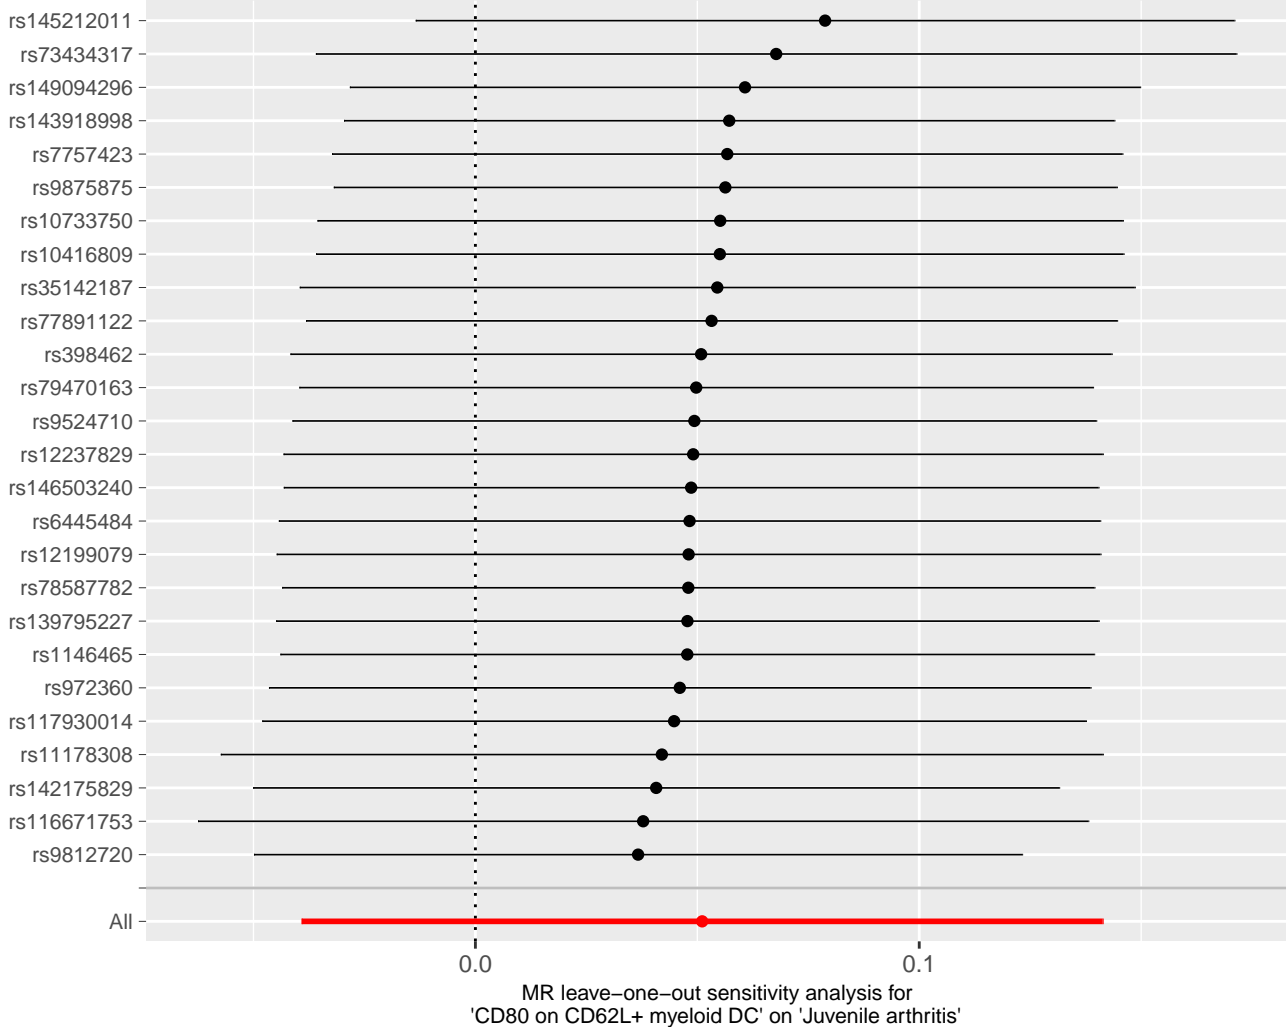

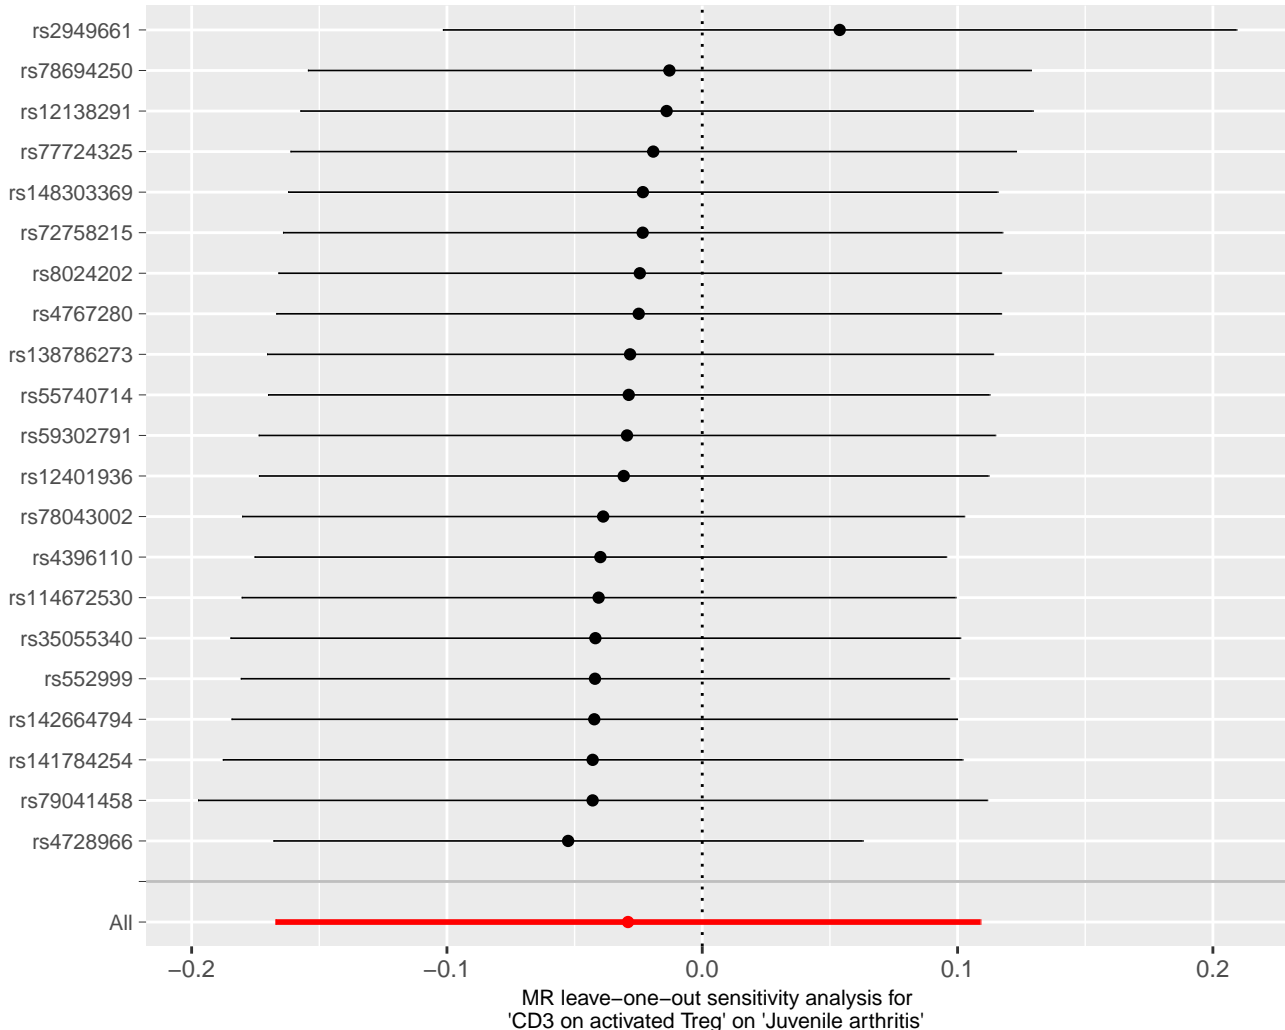



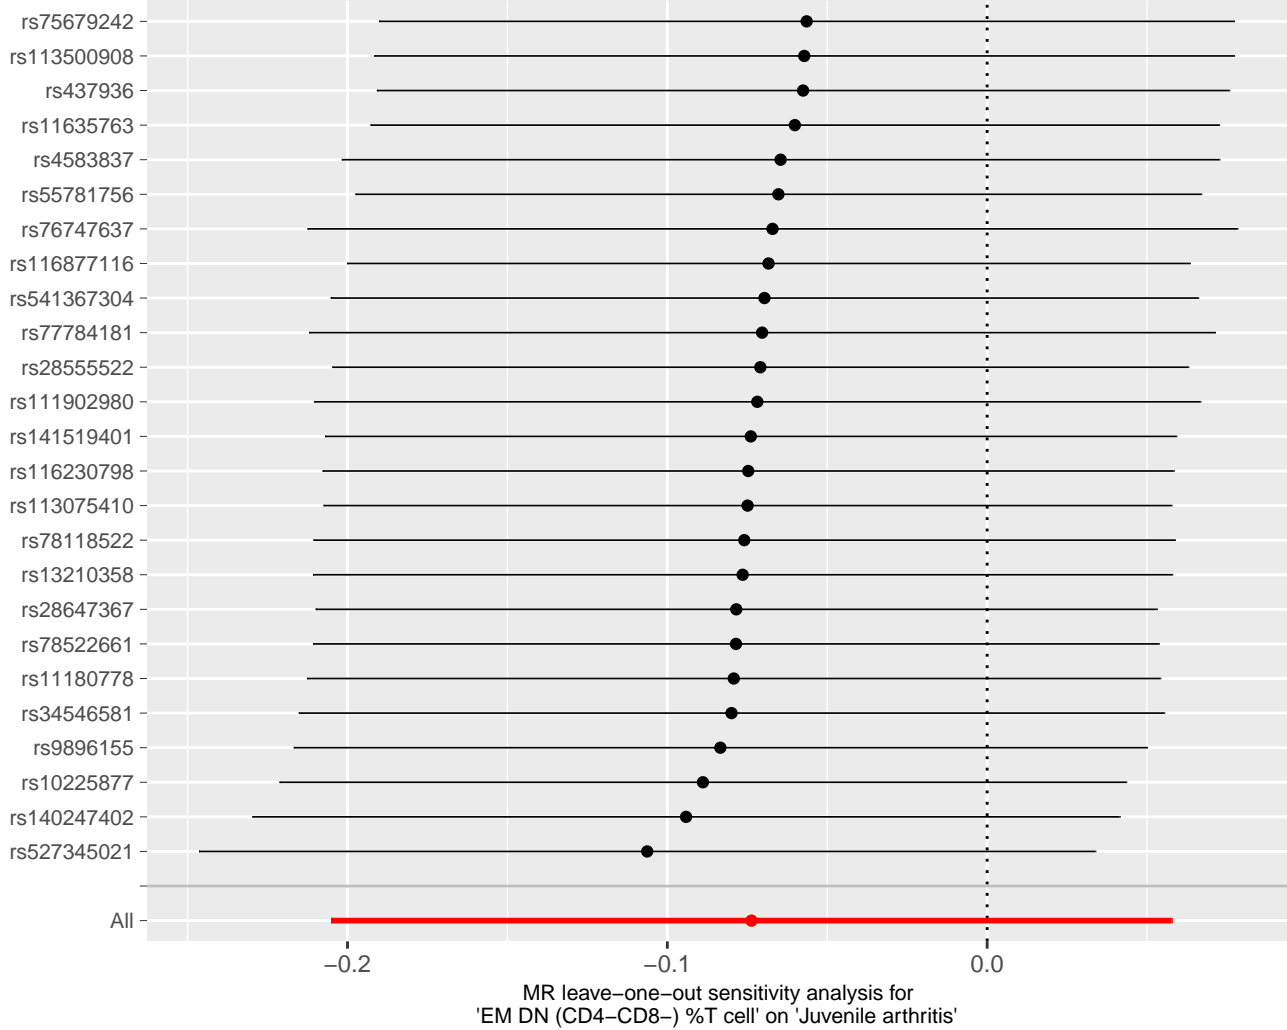

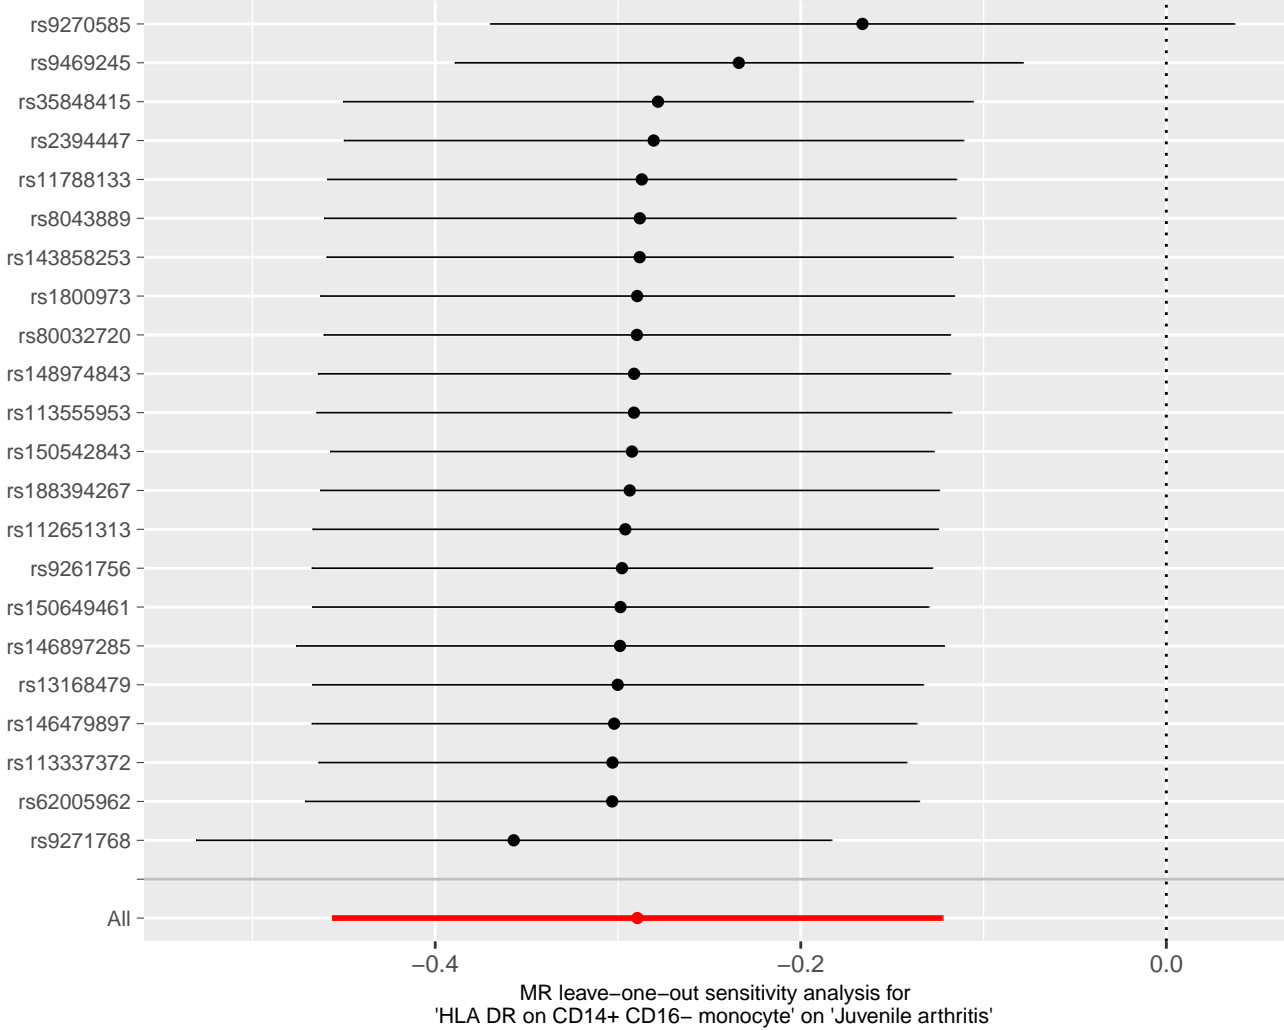

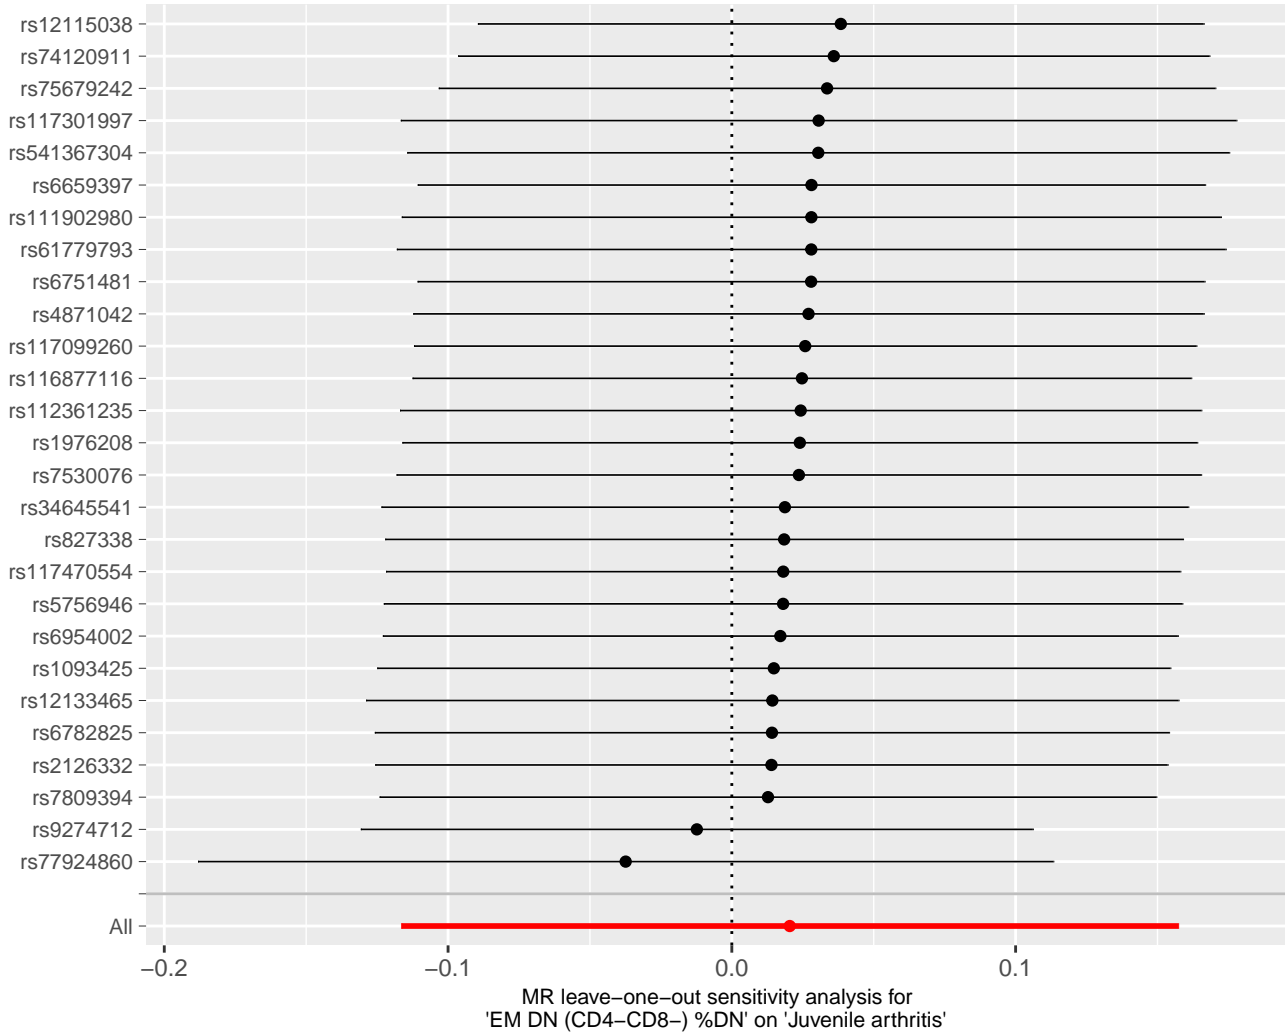

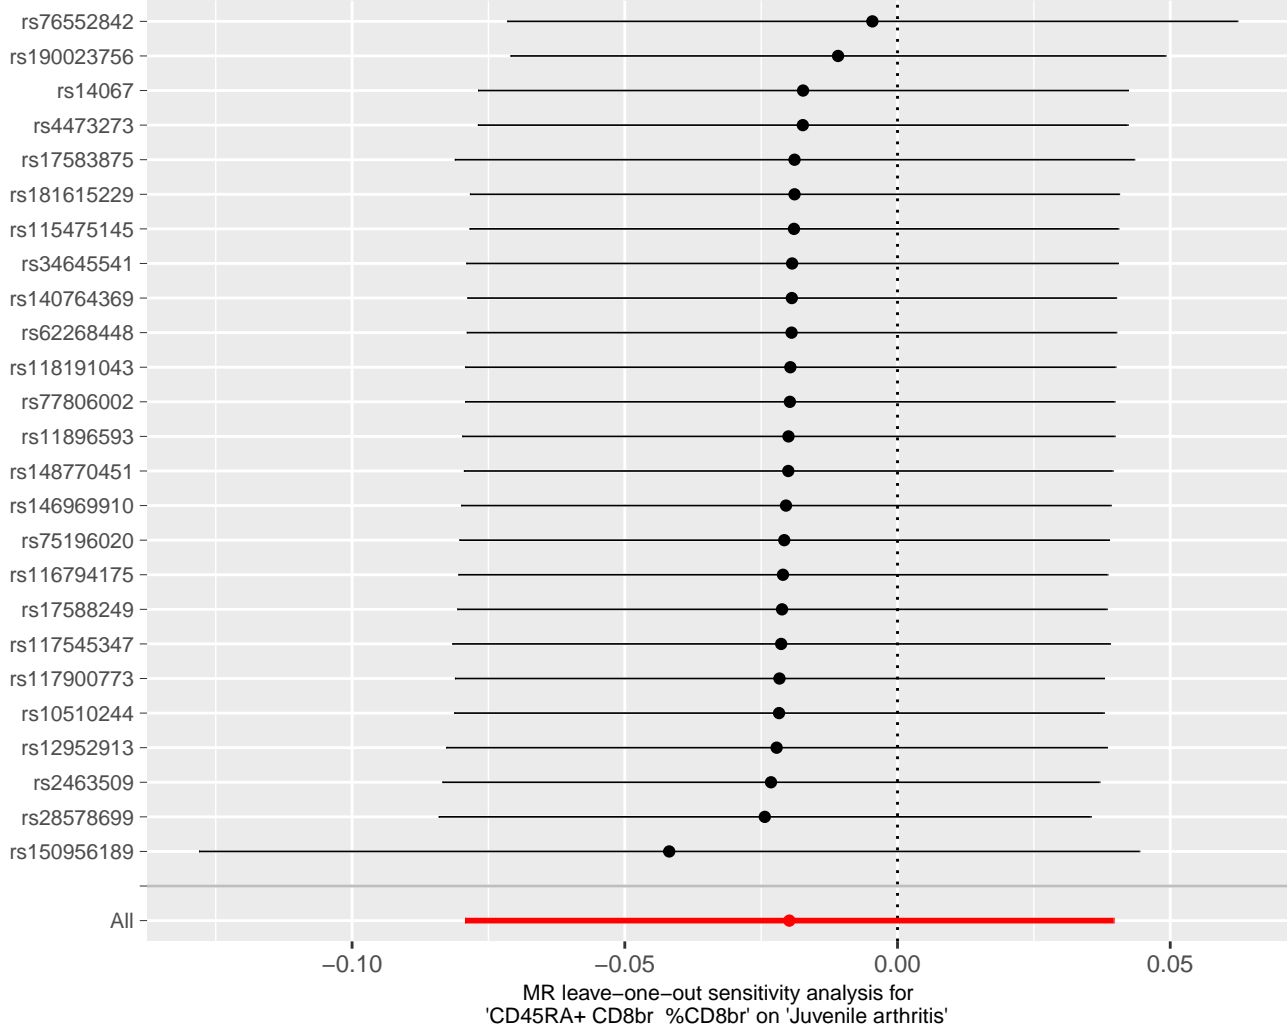

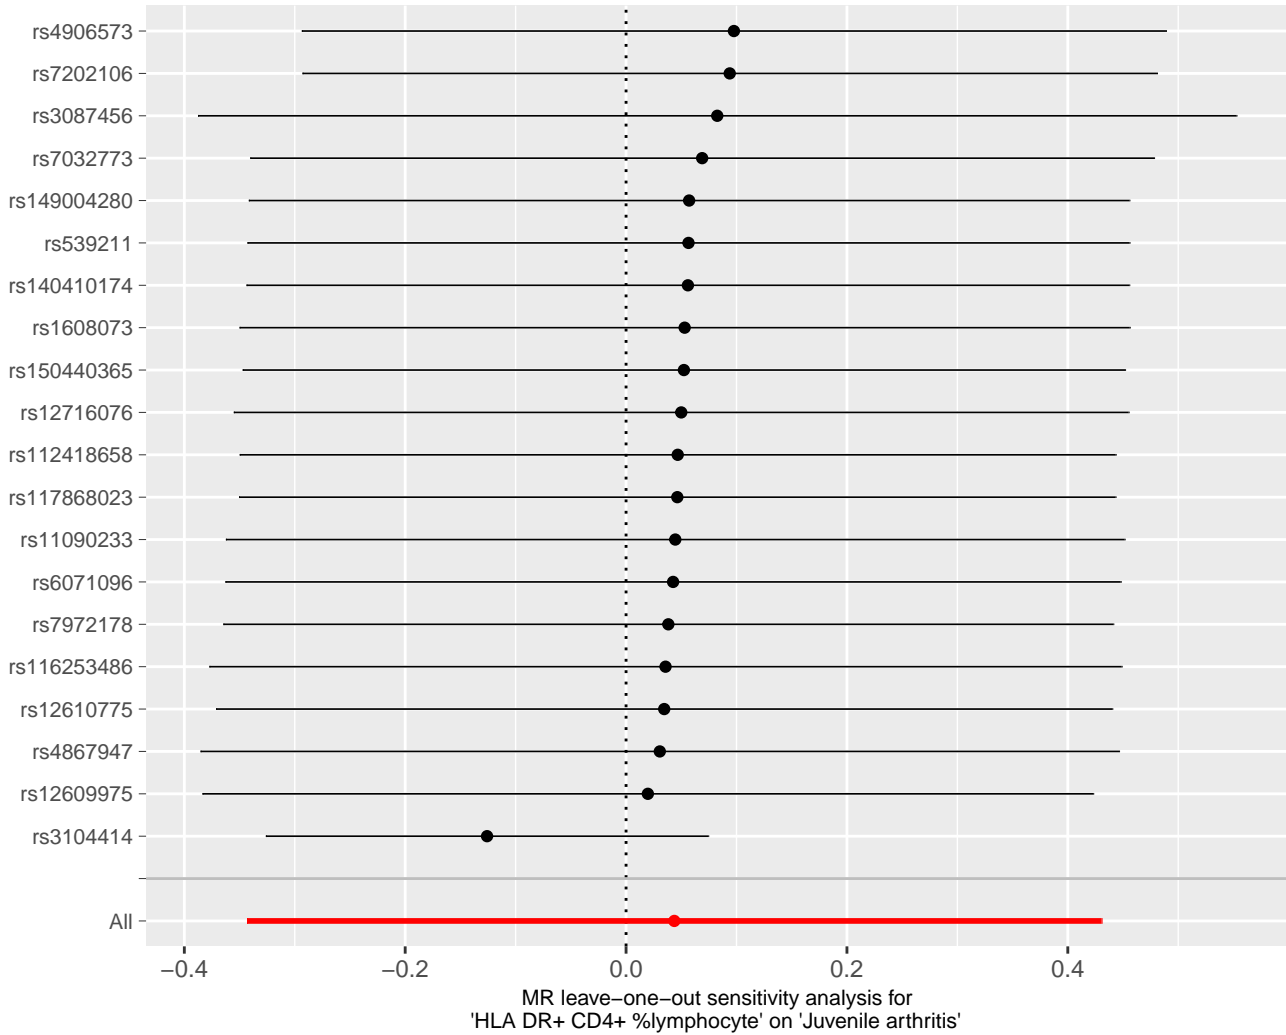

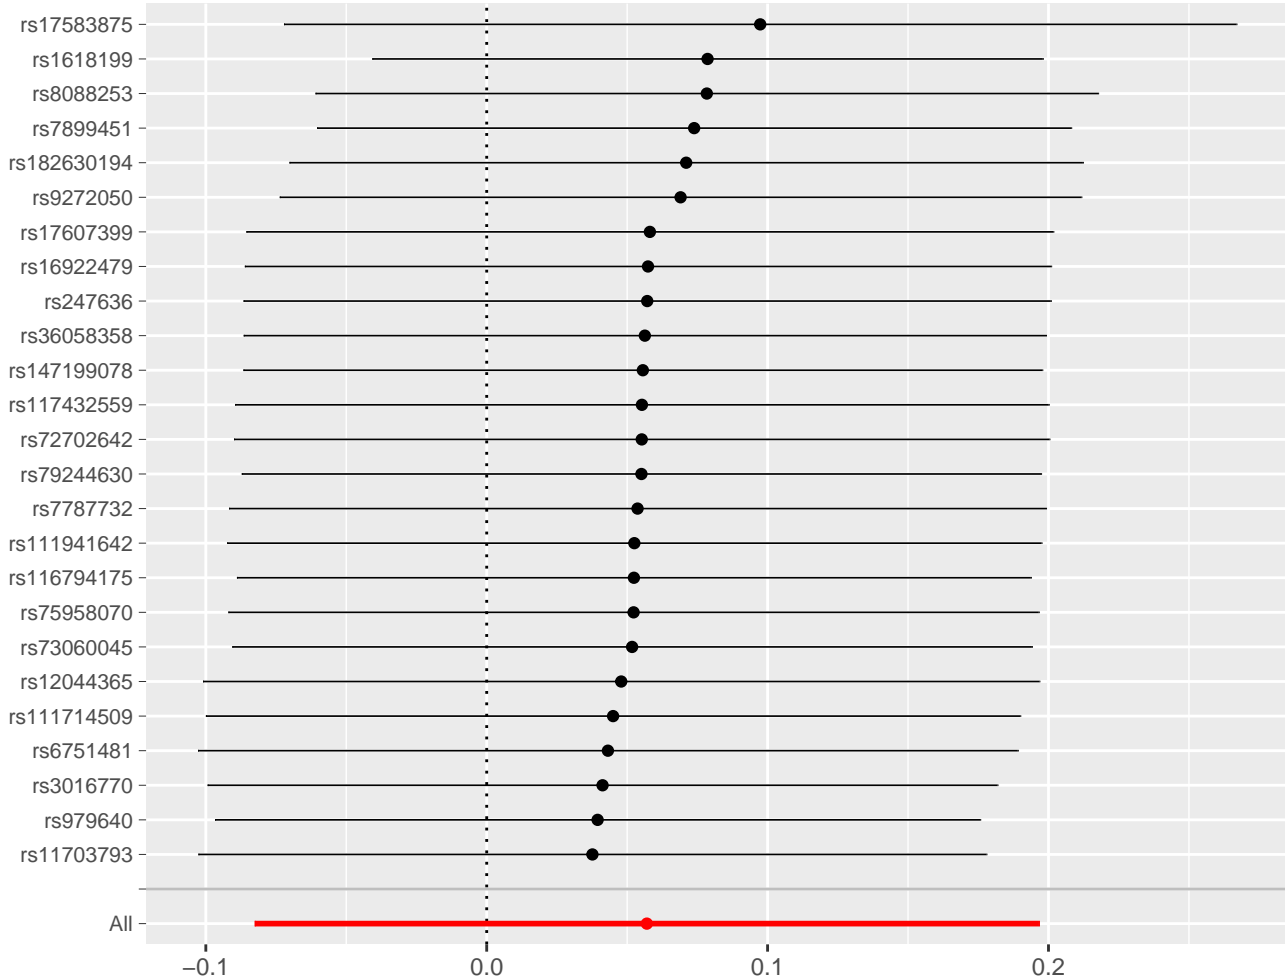

MR leave-one-out sensitivity analysis for 'Resting Treg AC' on 'Juvenile arthritis'

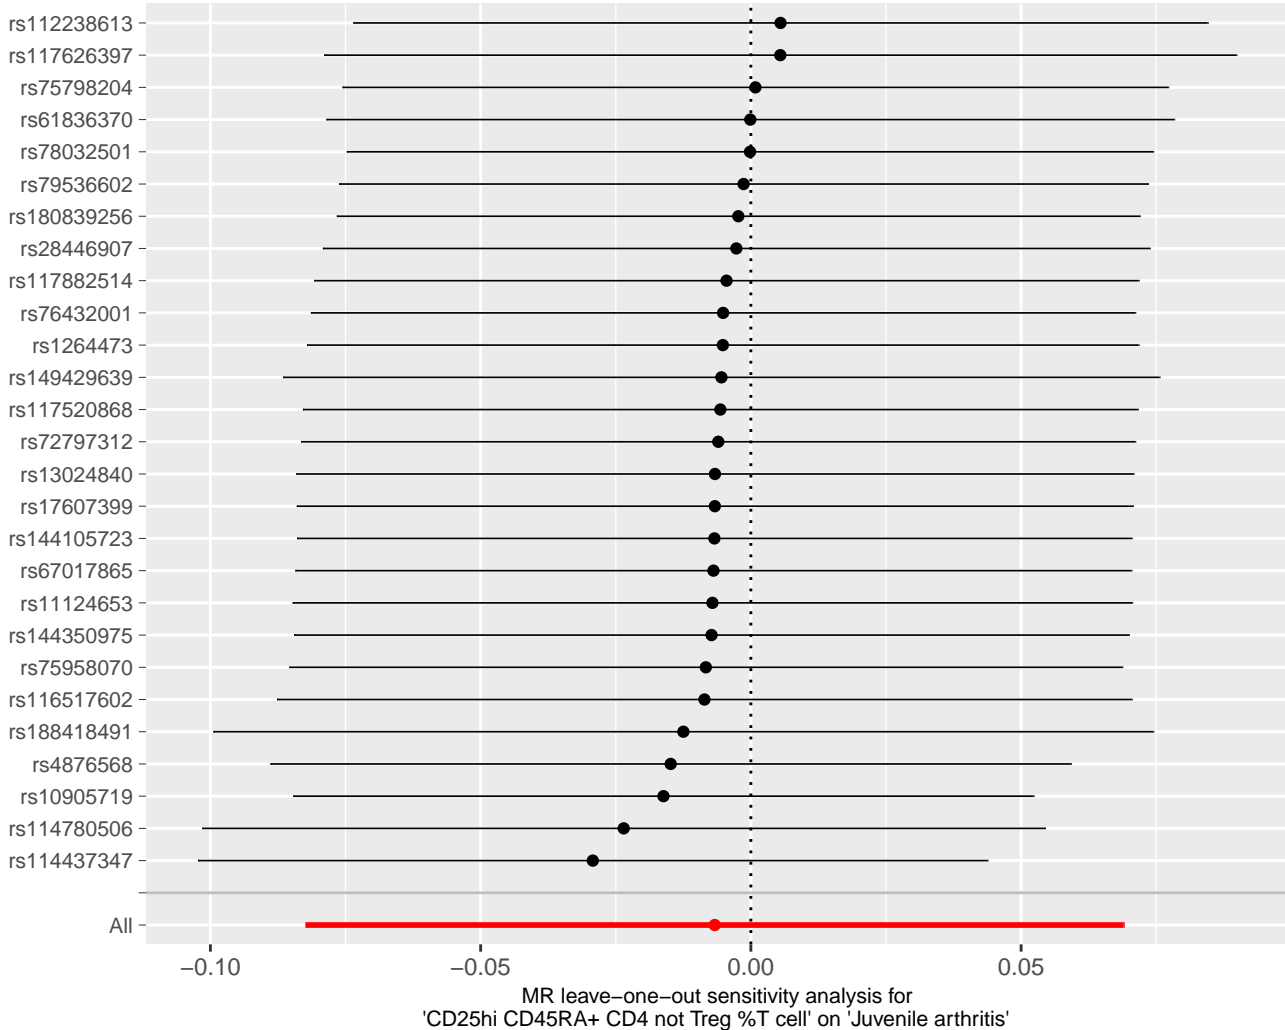

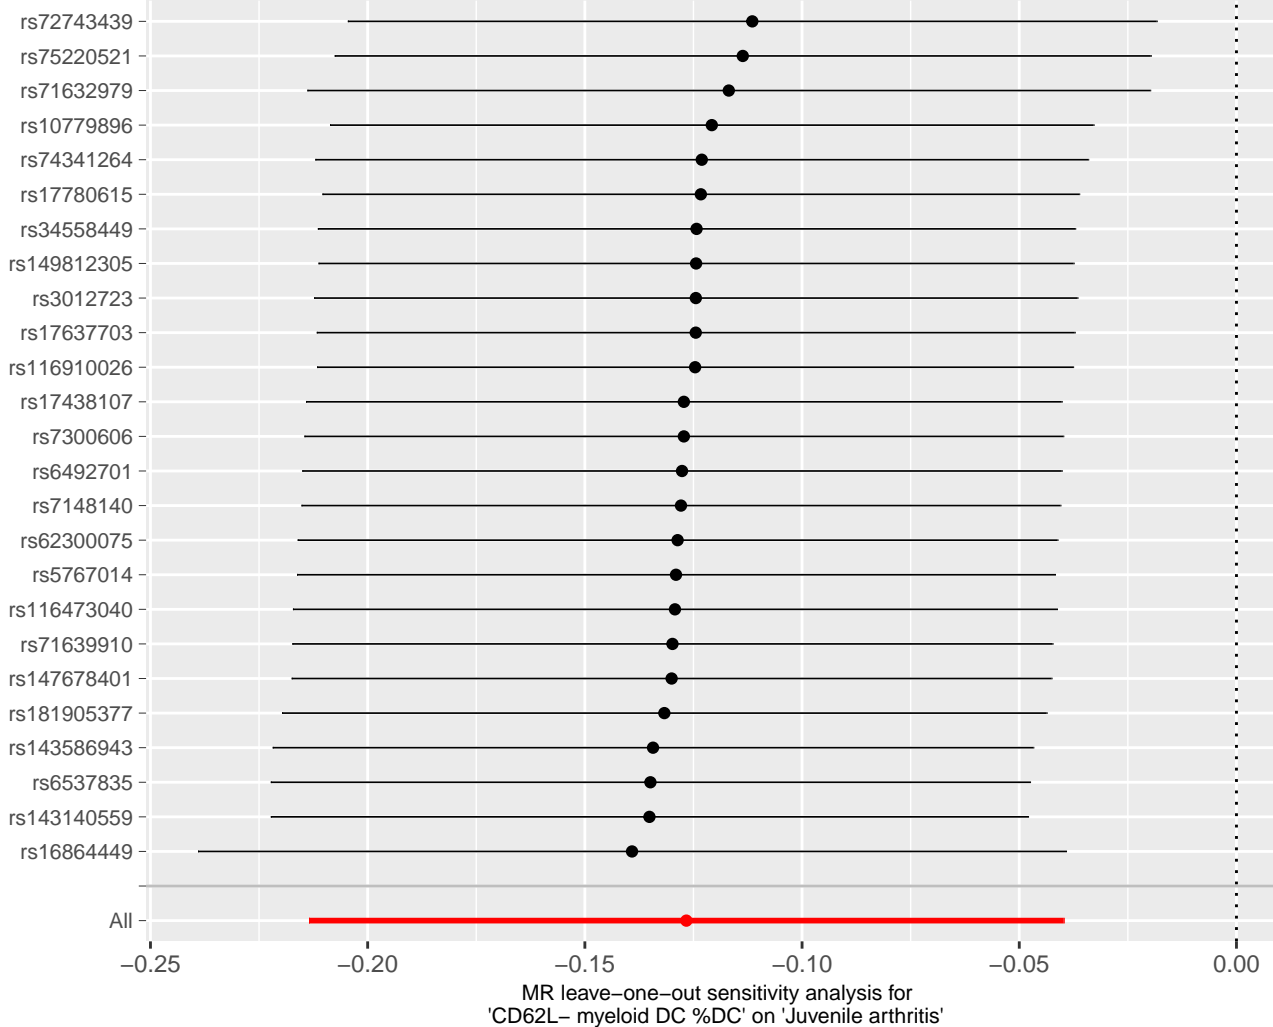



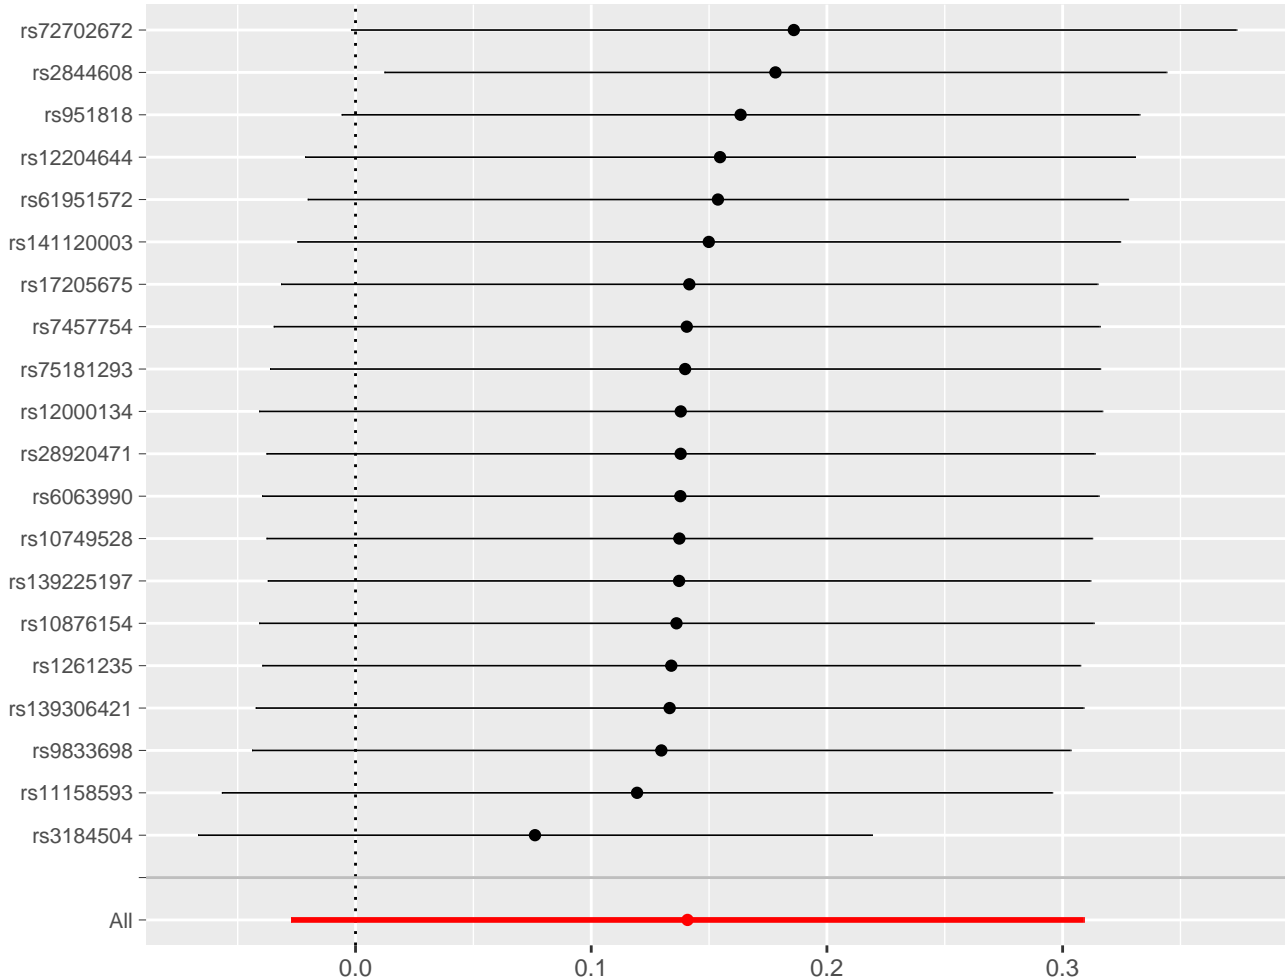

MR leave-one-out sensitivity analysis for 'CD4 on naive CD4+' on 'Juvenile arthritis'

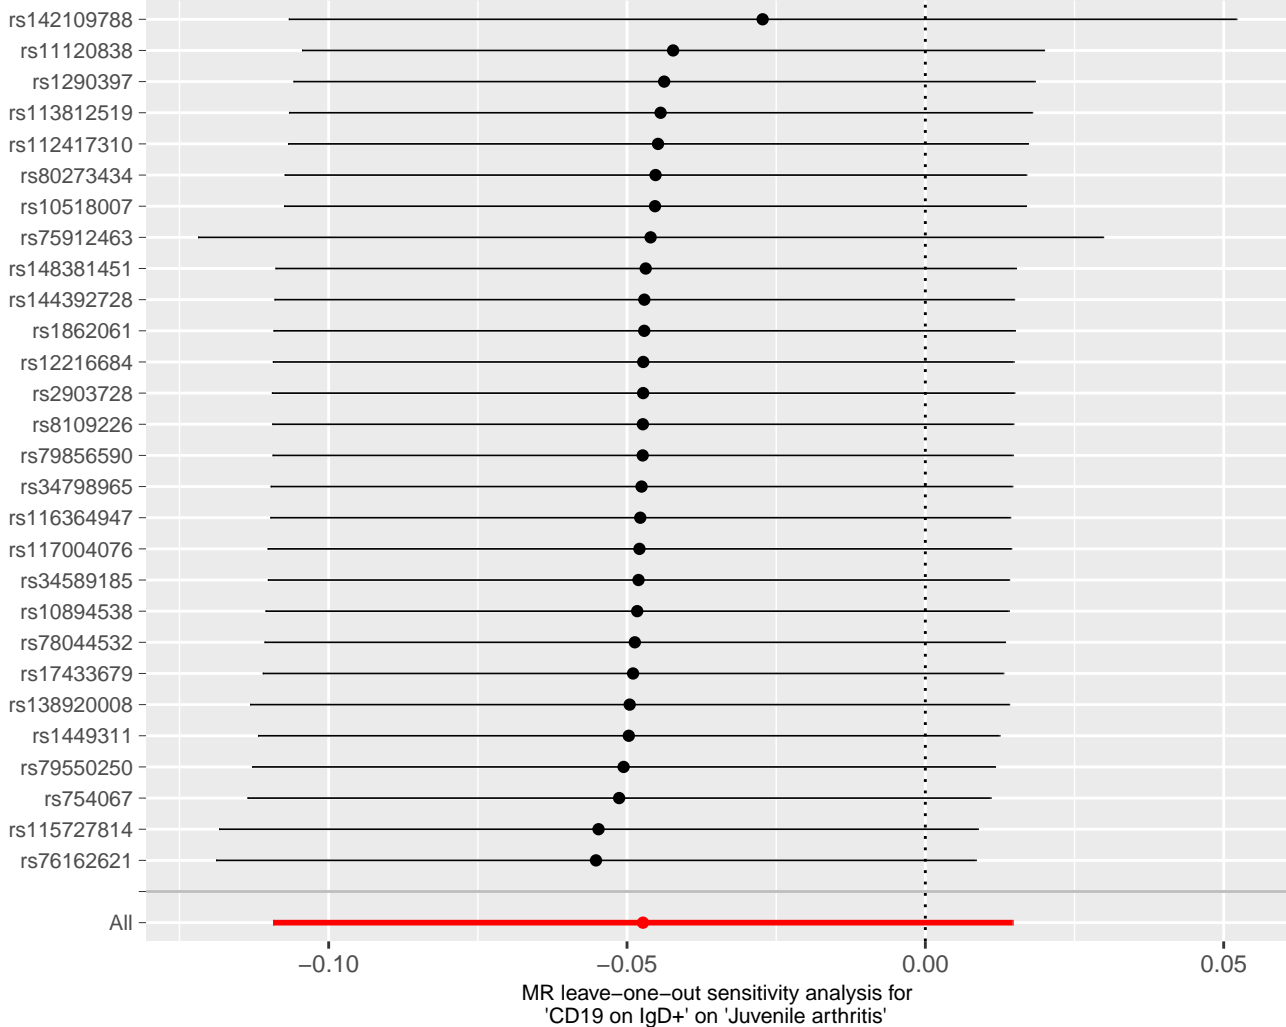

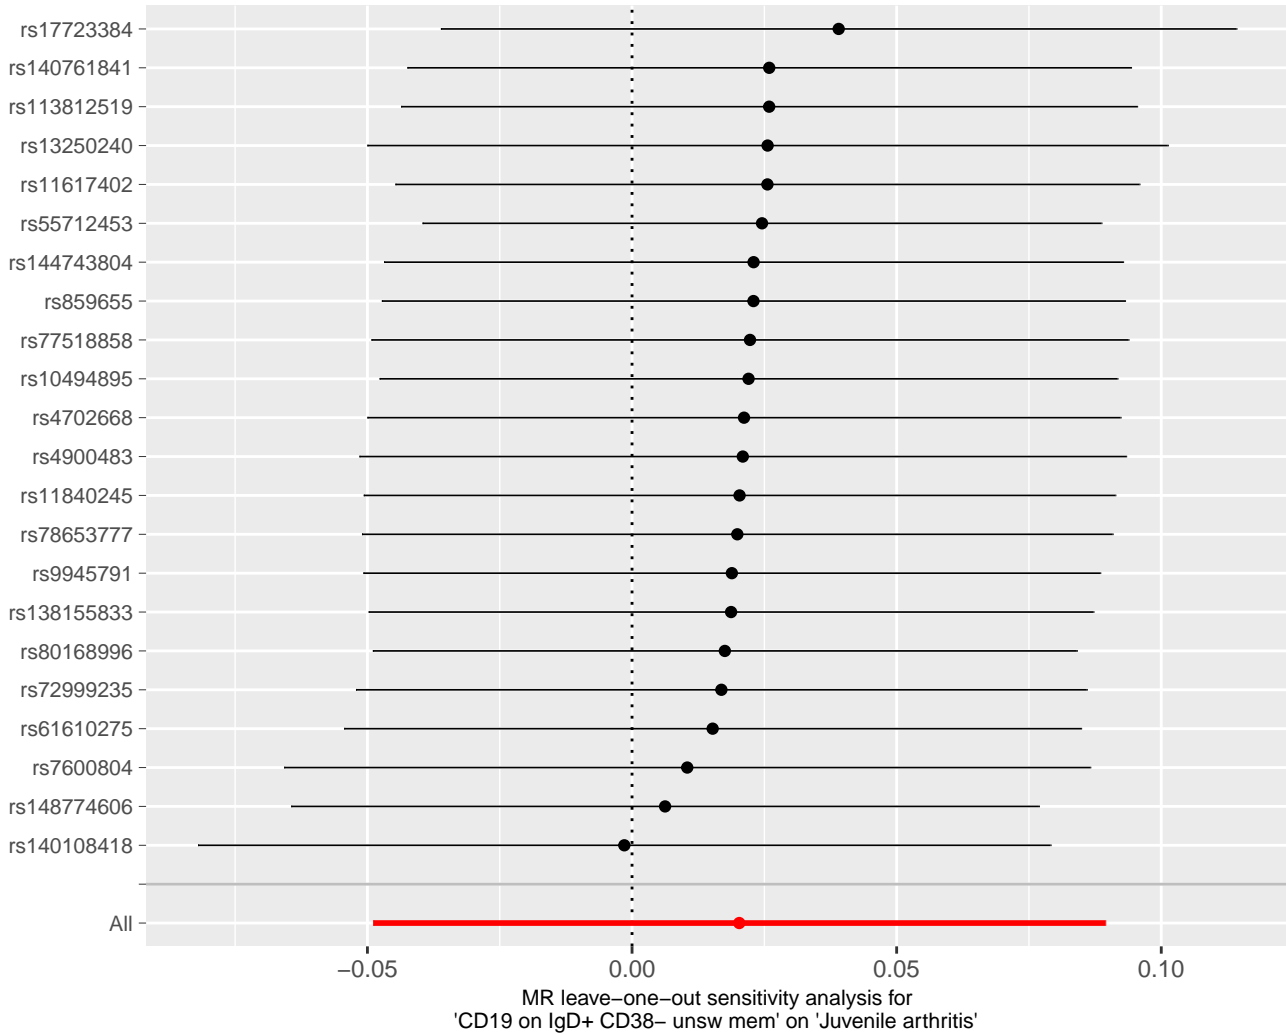

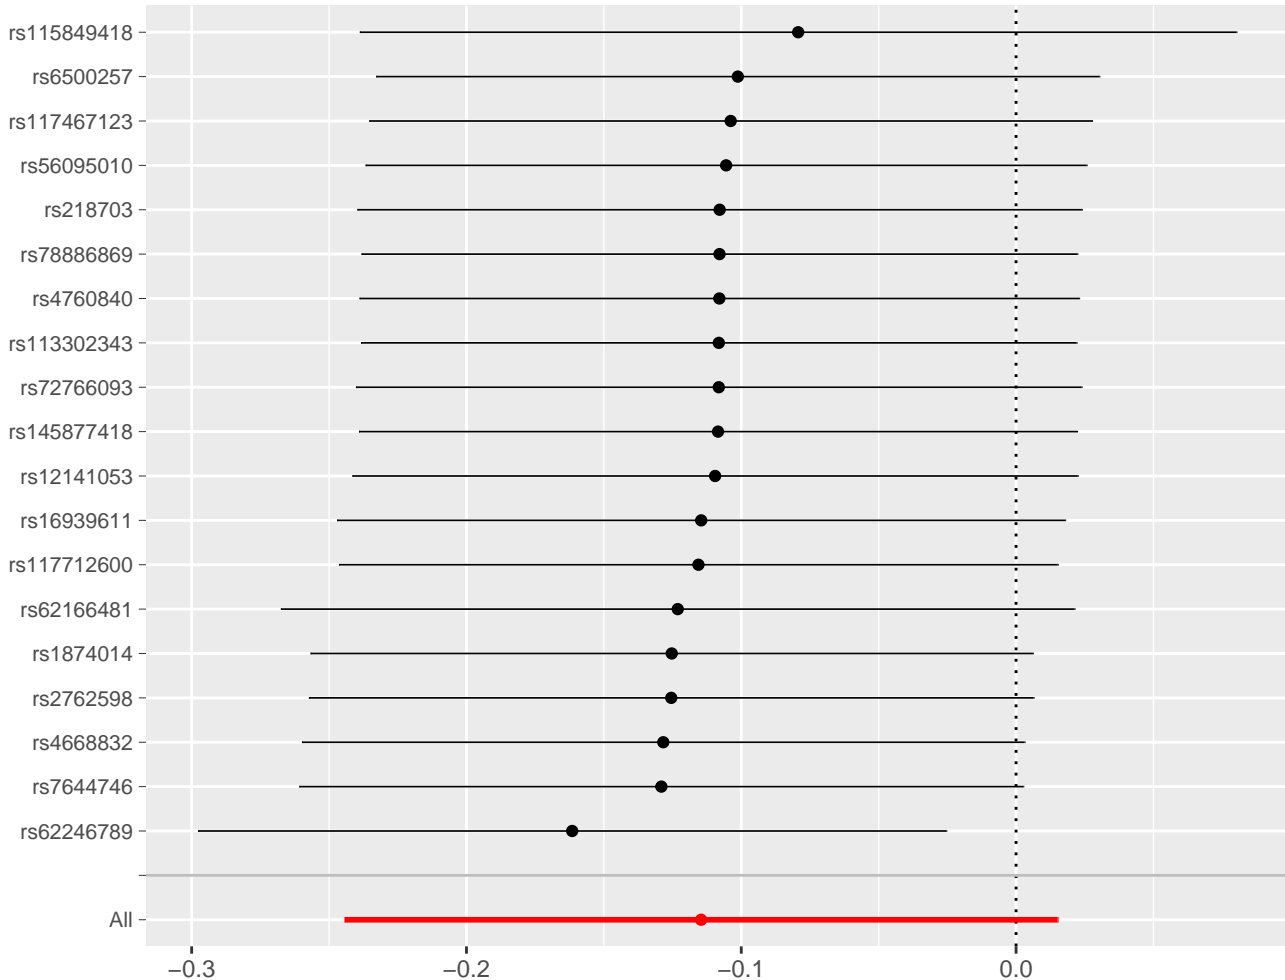

MR leave-one-out sensitivity analysis for  
'CD127 on CD28- CD8br ' on 'Juvenile arthritis'

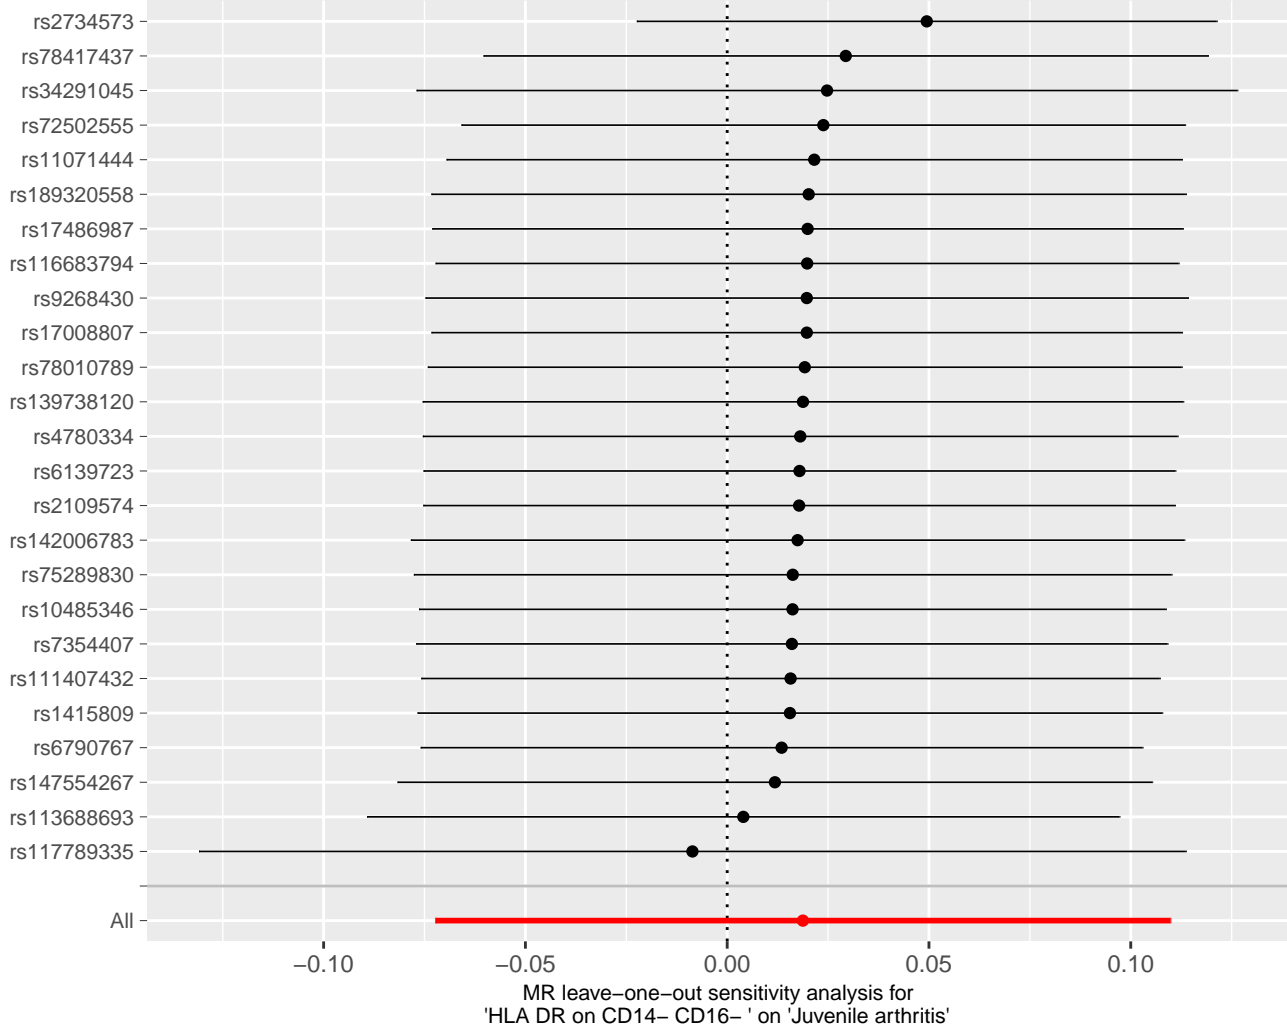

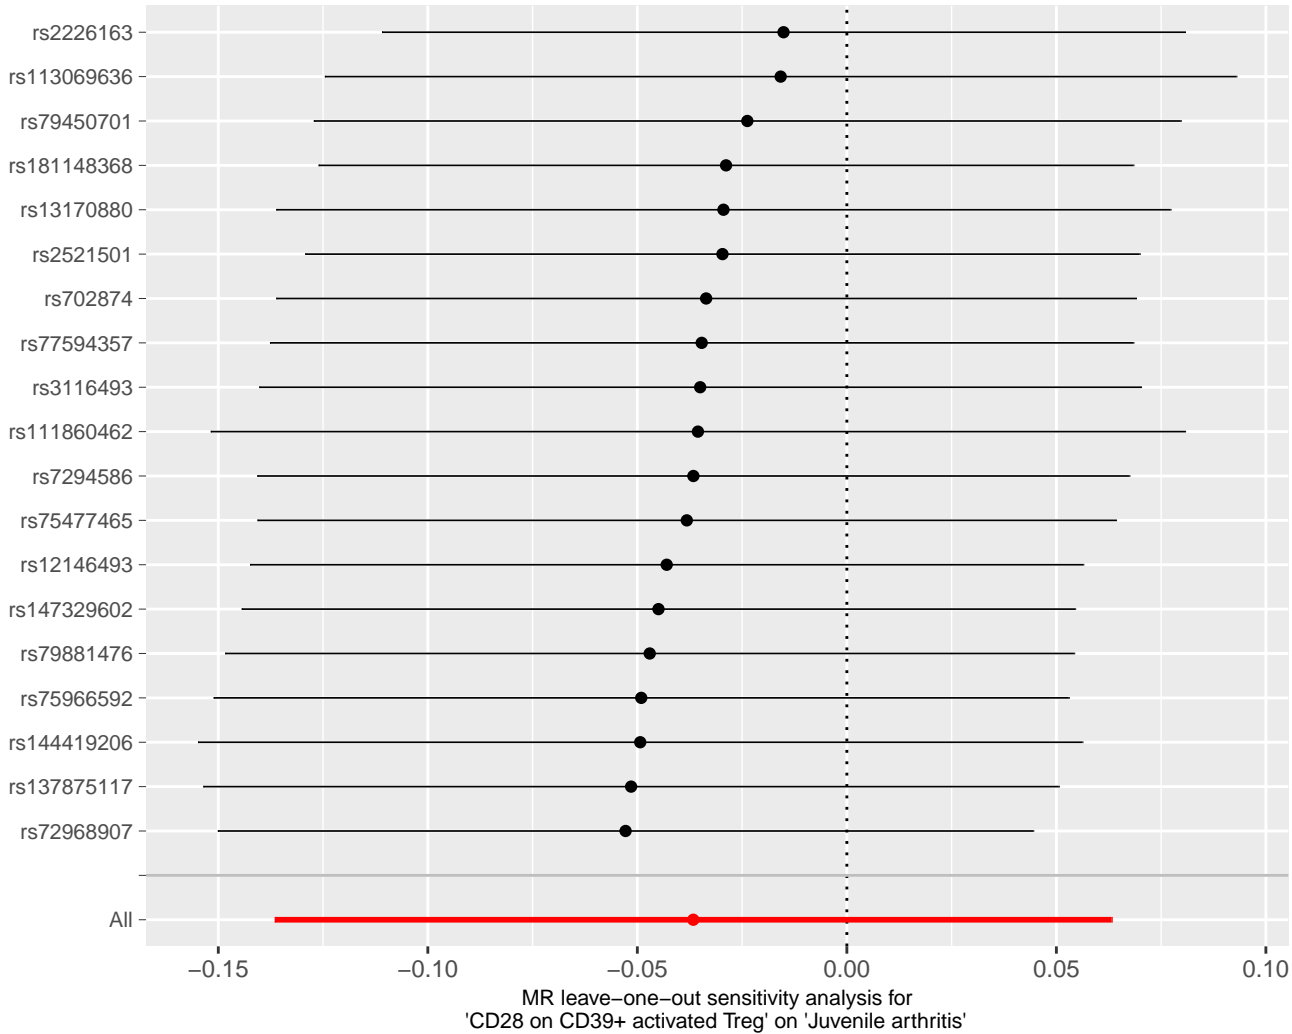

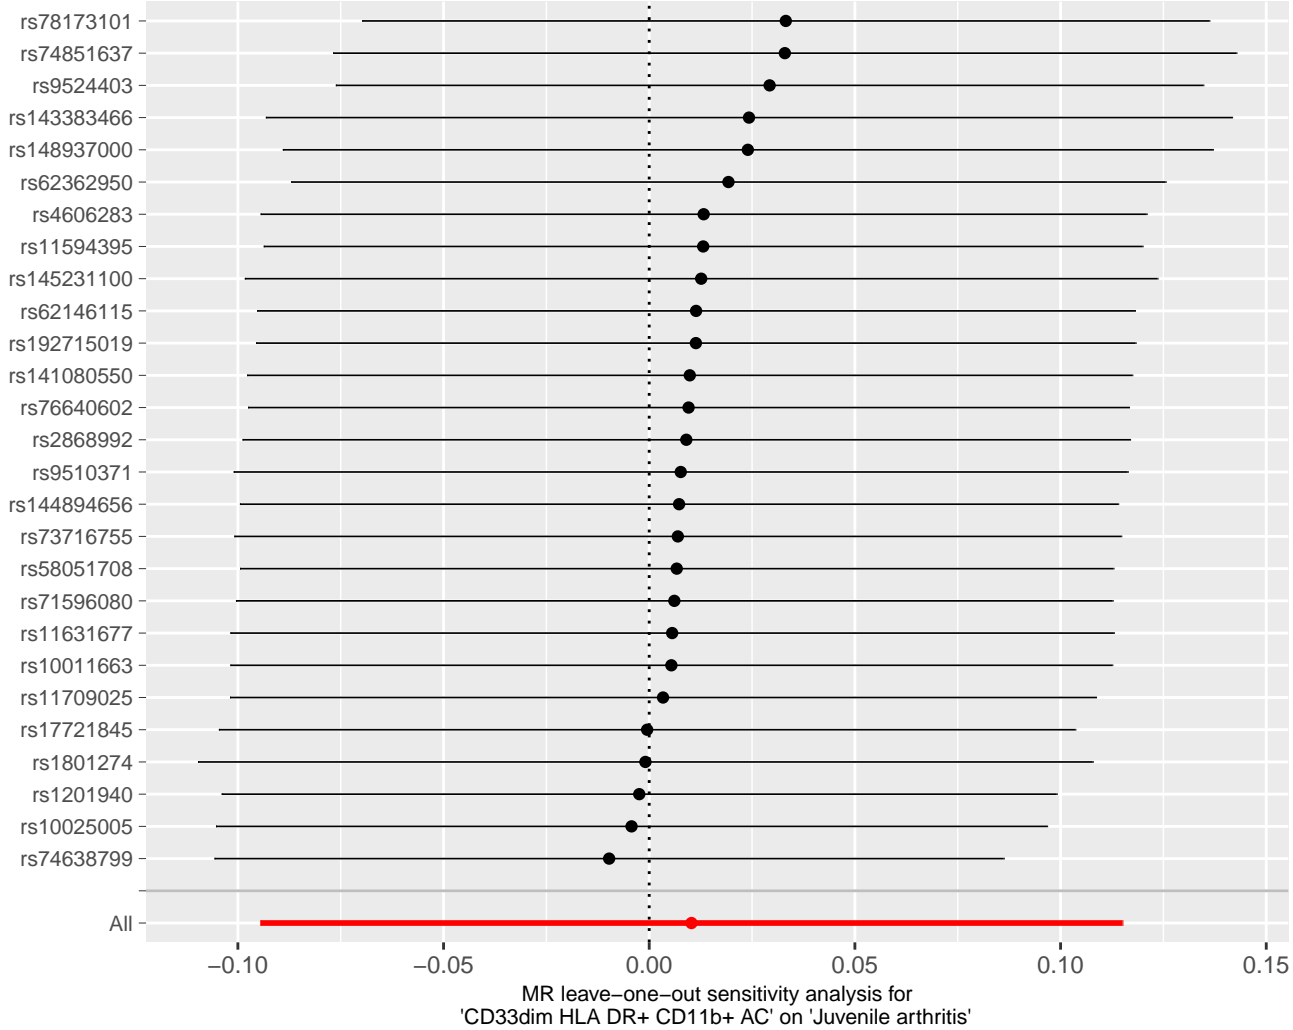

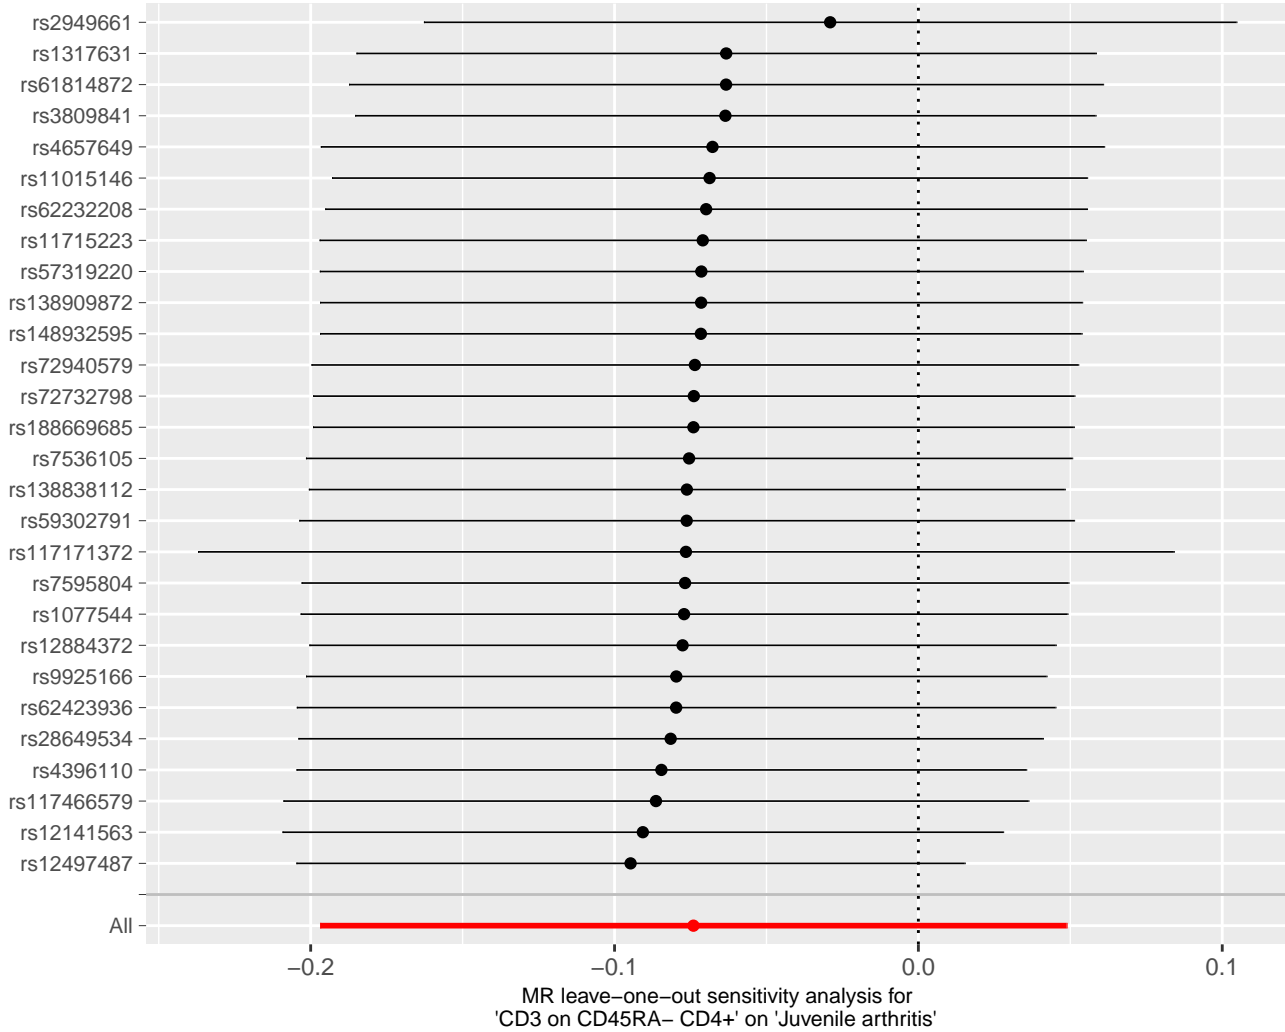



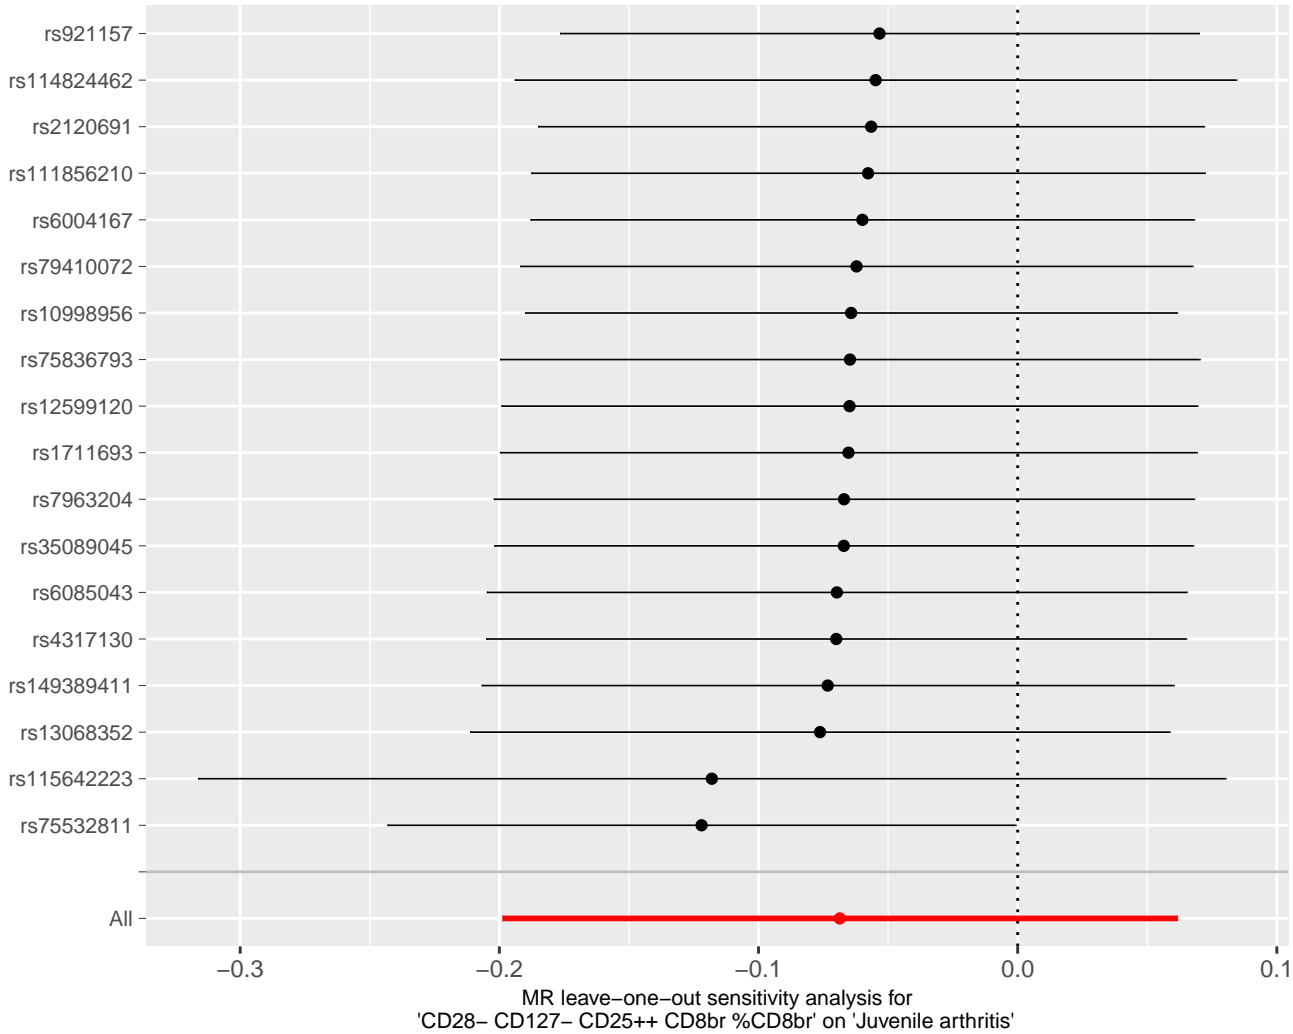

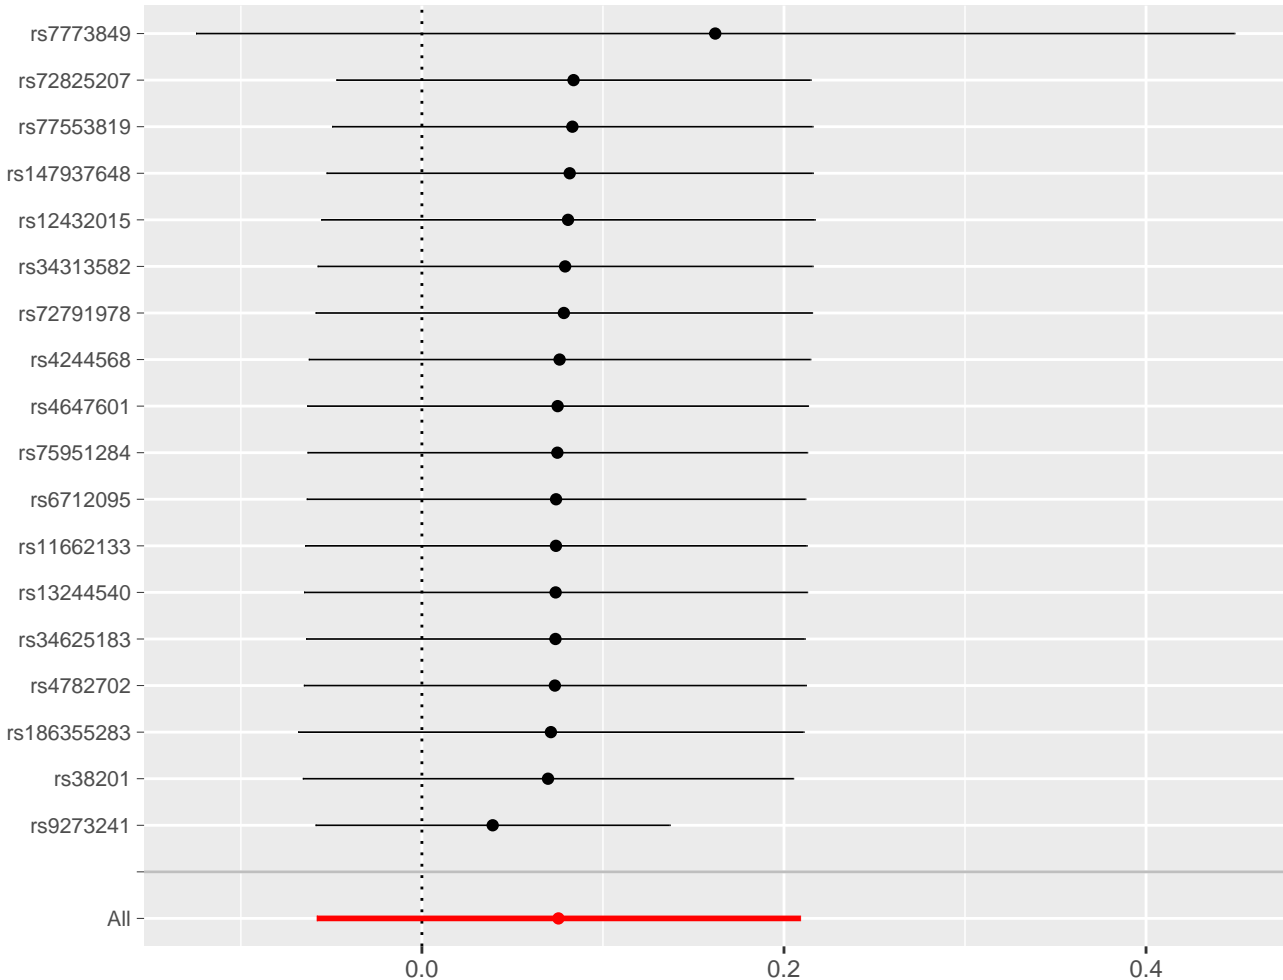

MR leave-one-out sensitivity analysis for 'CD20- %lymphocyte' on 'Juvenile arthritis'

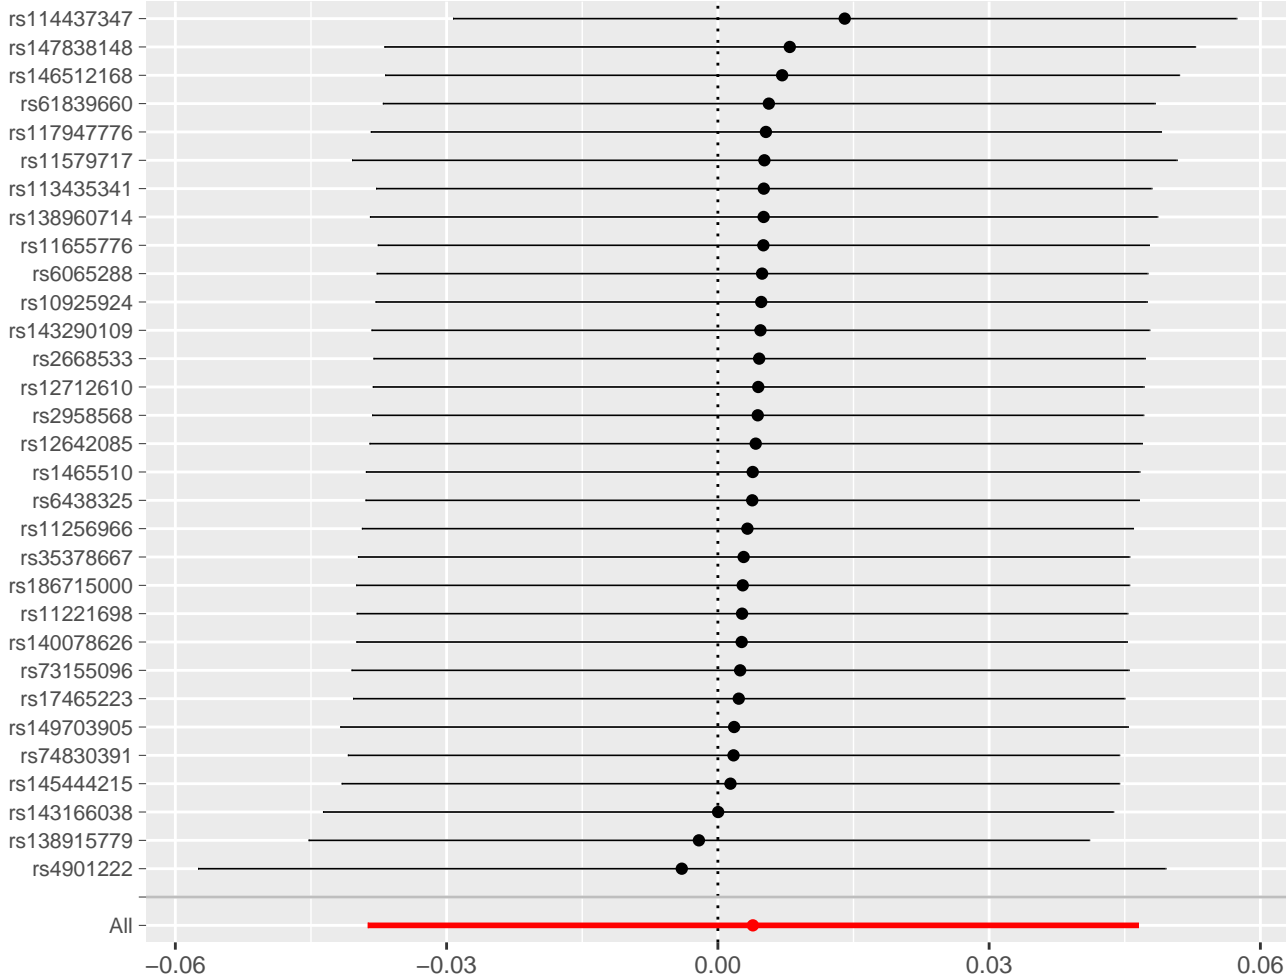

MR leave-one-out sensitivity analysis for  
'Activated & secreting Treg %CD4+' on 'Juvenile arthritis'

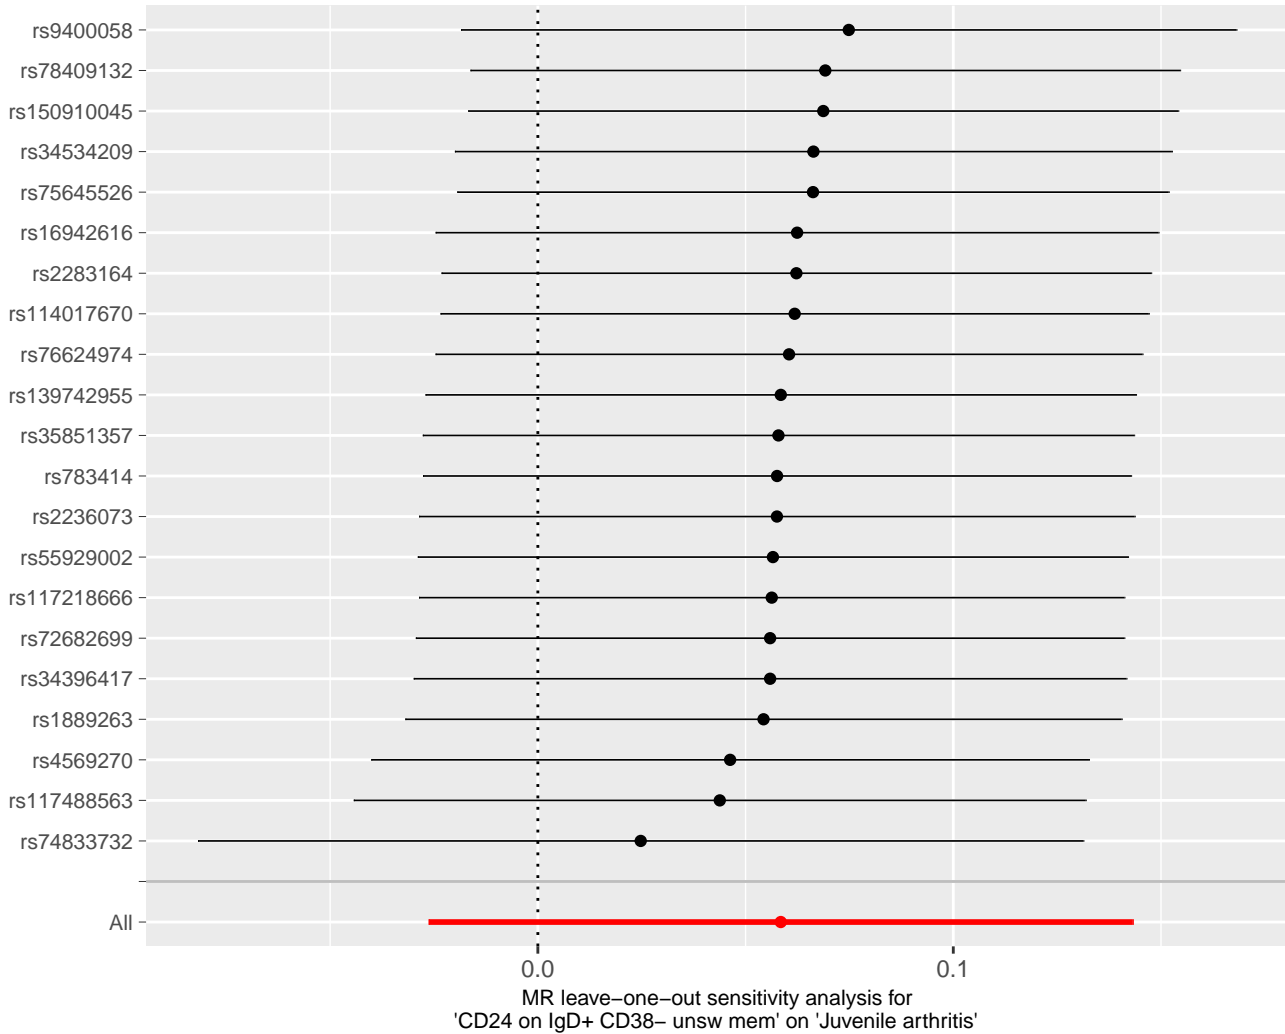

rs149297162

rs71592595

rs62107683

rs149764572

All

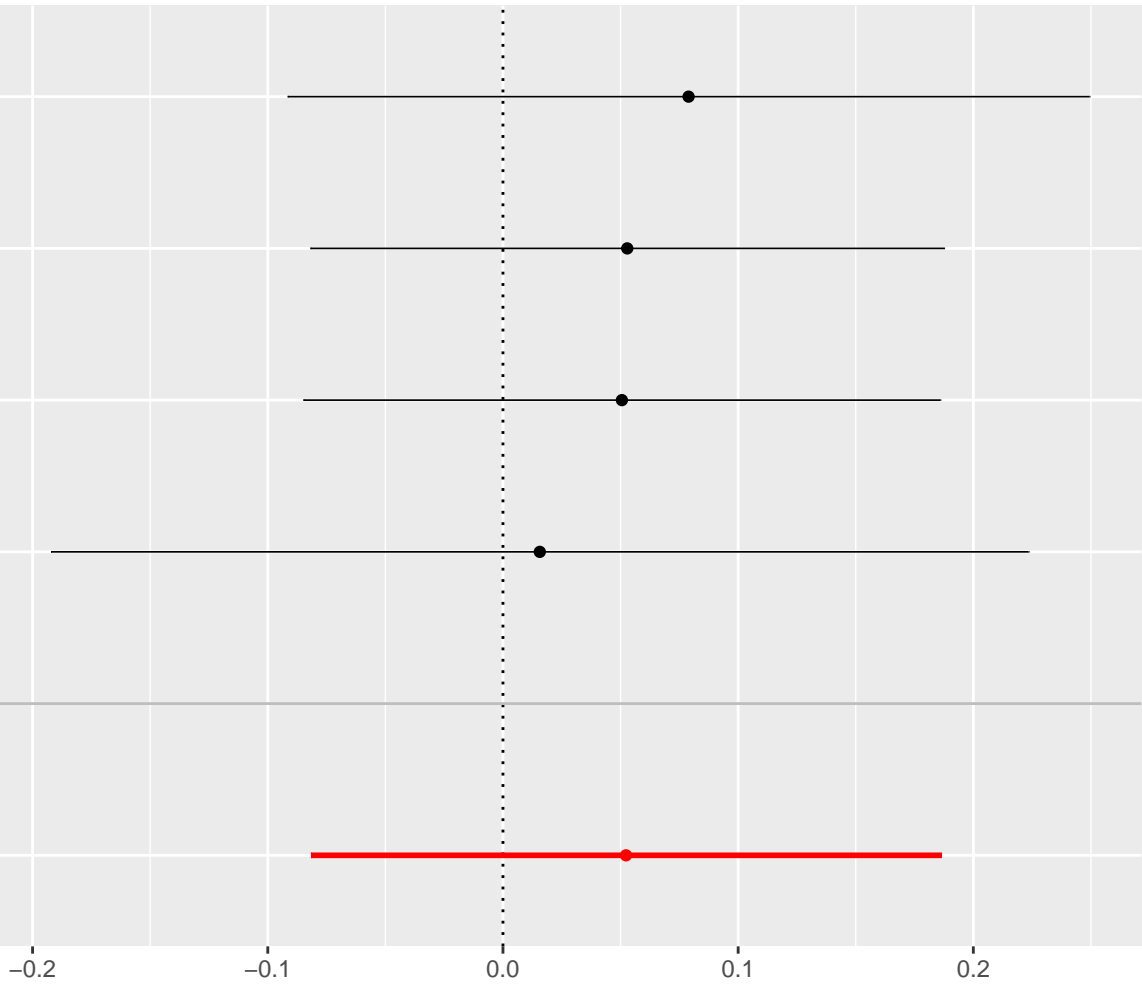

MR leave-one-out sensitivity analysis for 'CM DN (CD4-CD8-) AC' on 'Juvenile arthritis'

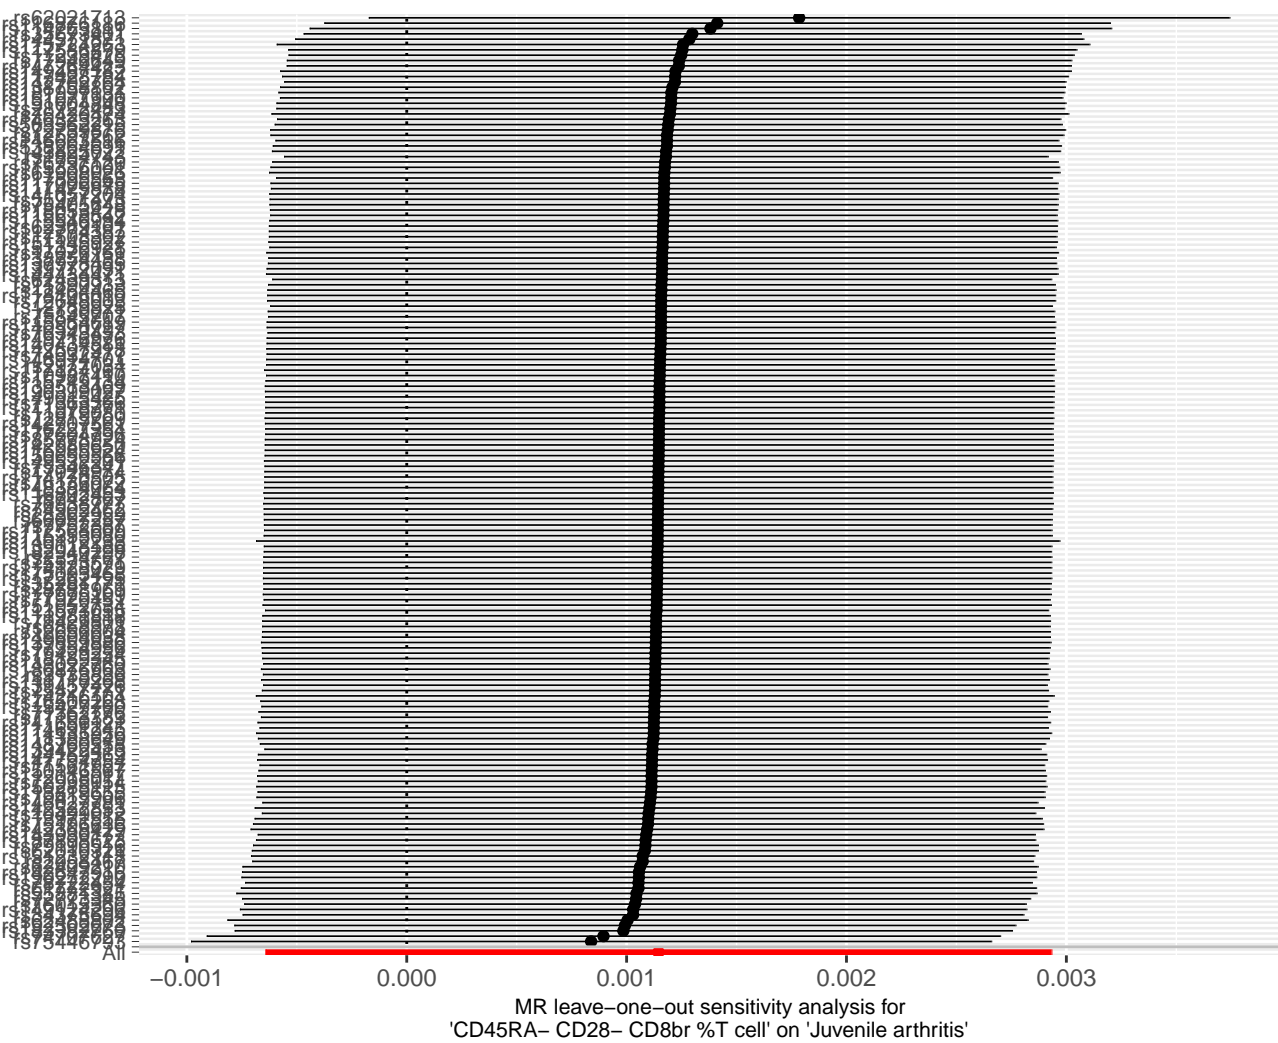

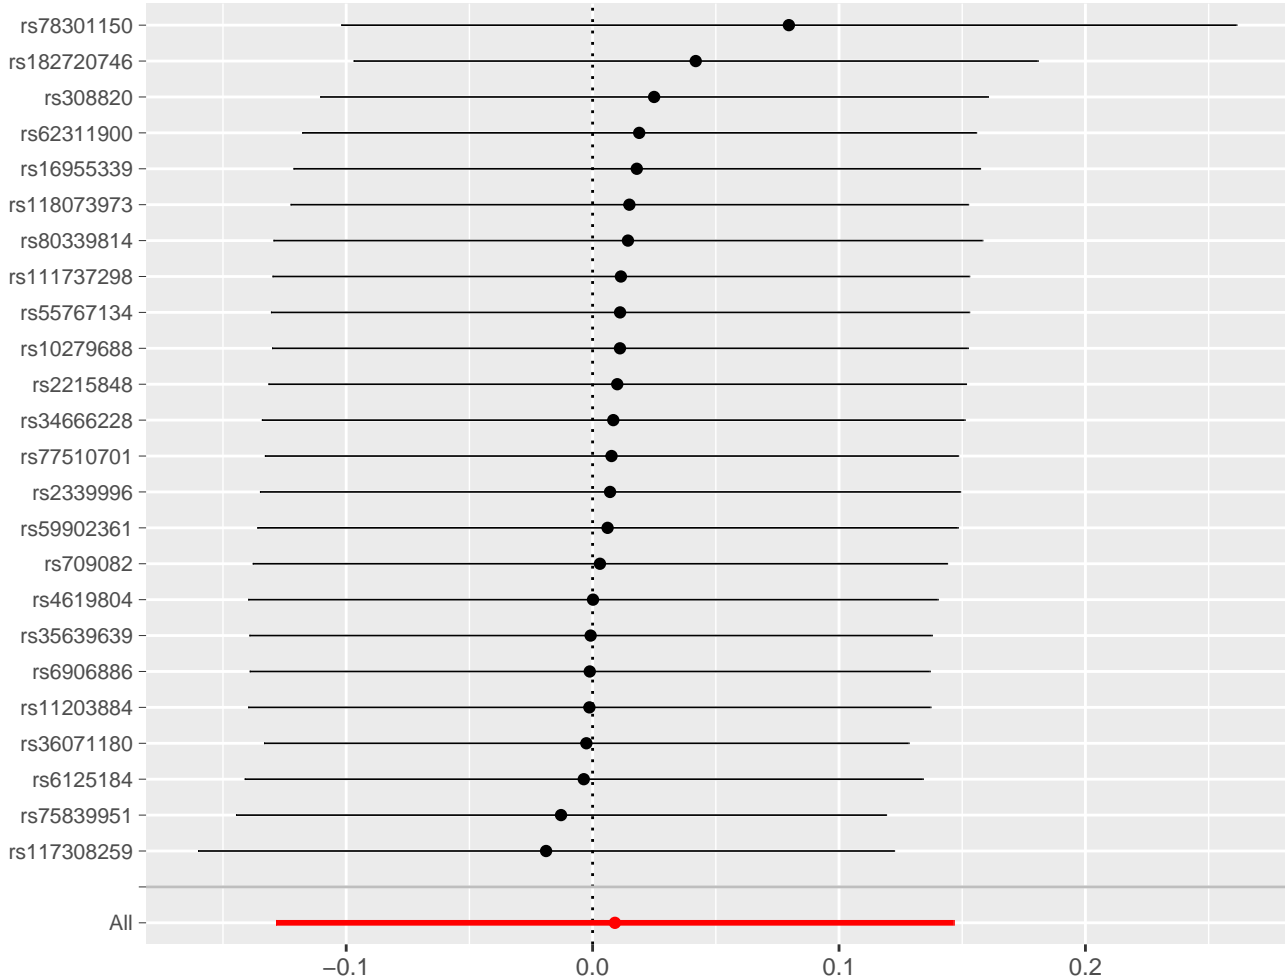

MR leave-one-out sensitivity analysis for 'CD20- CD38- %lymphocyte' on 'Juvenile arthritis'

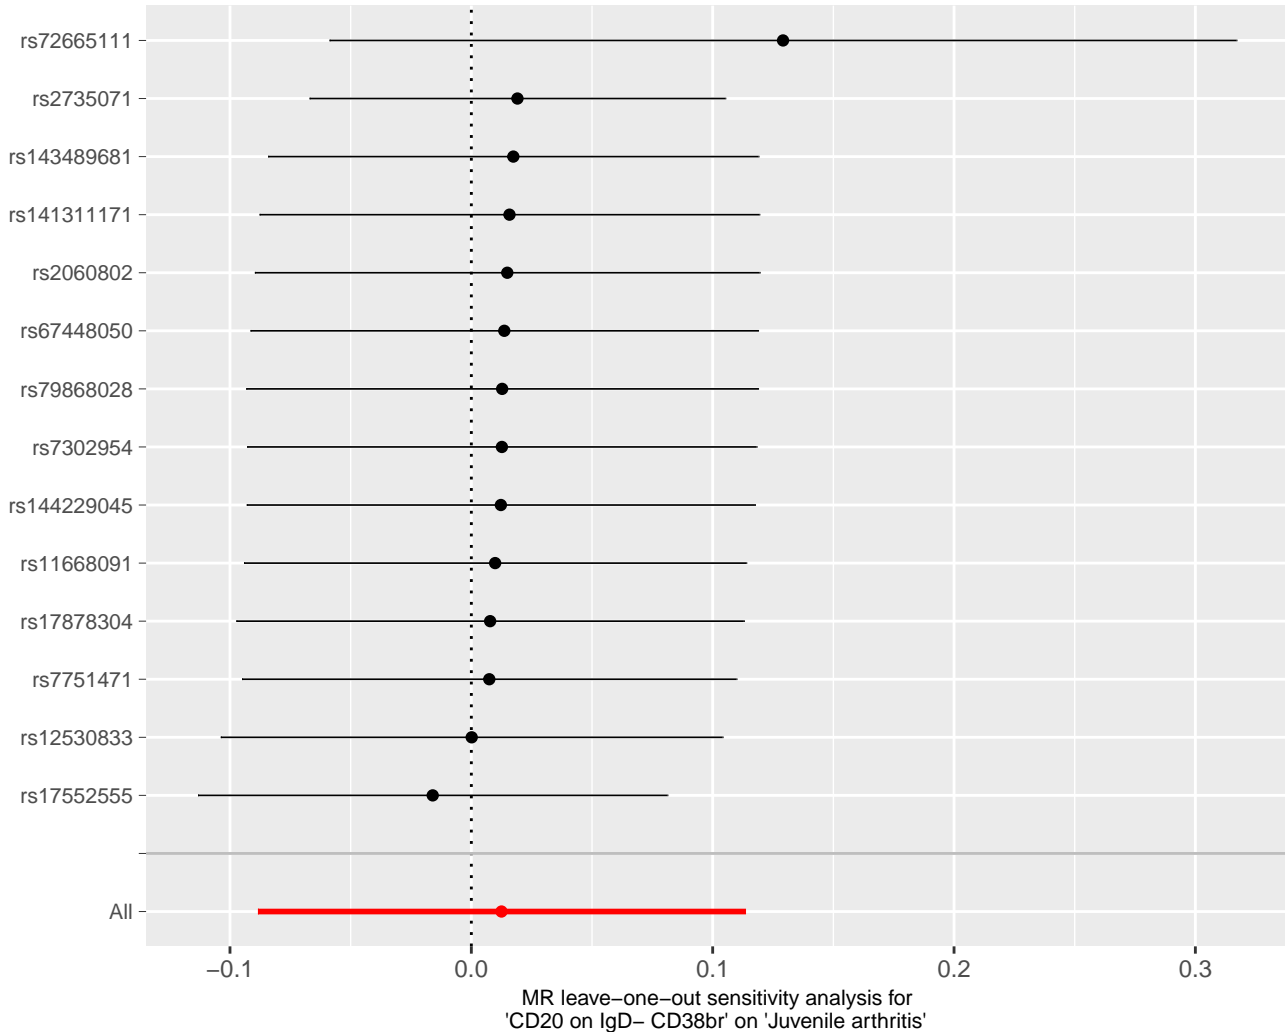



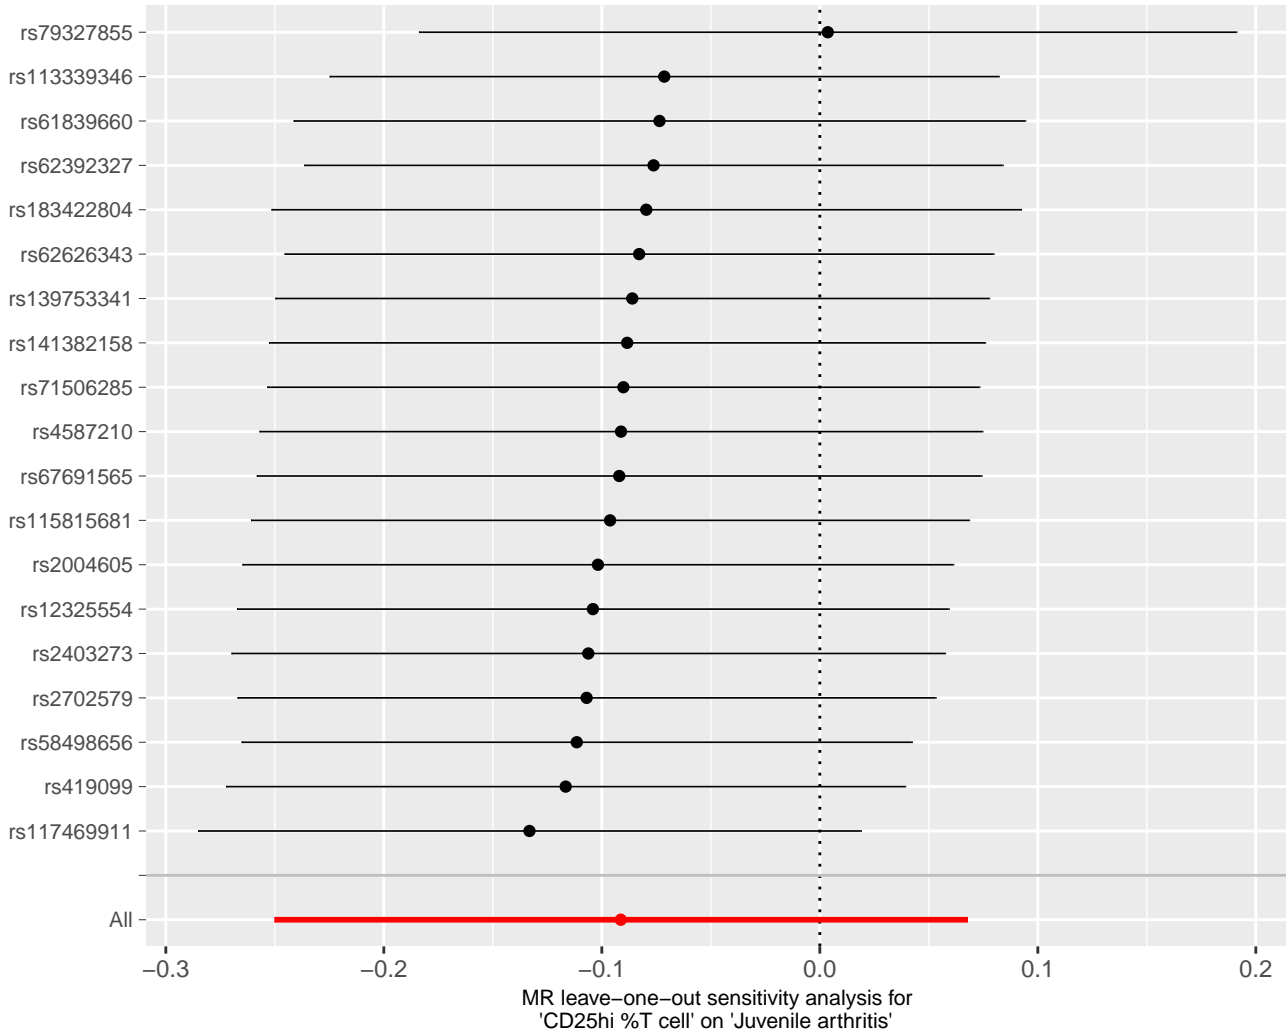

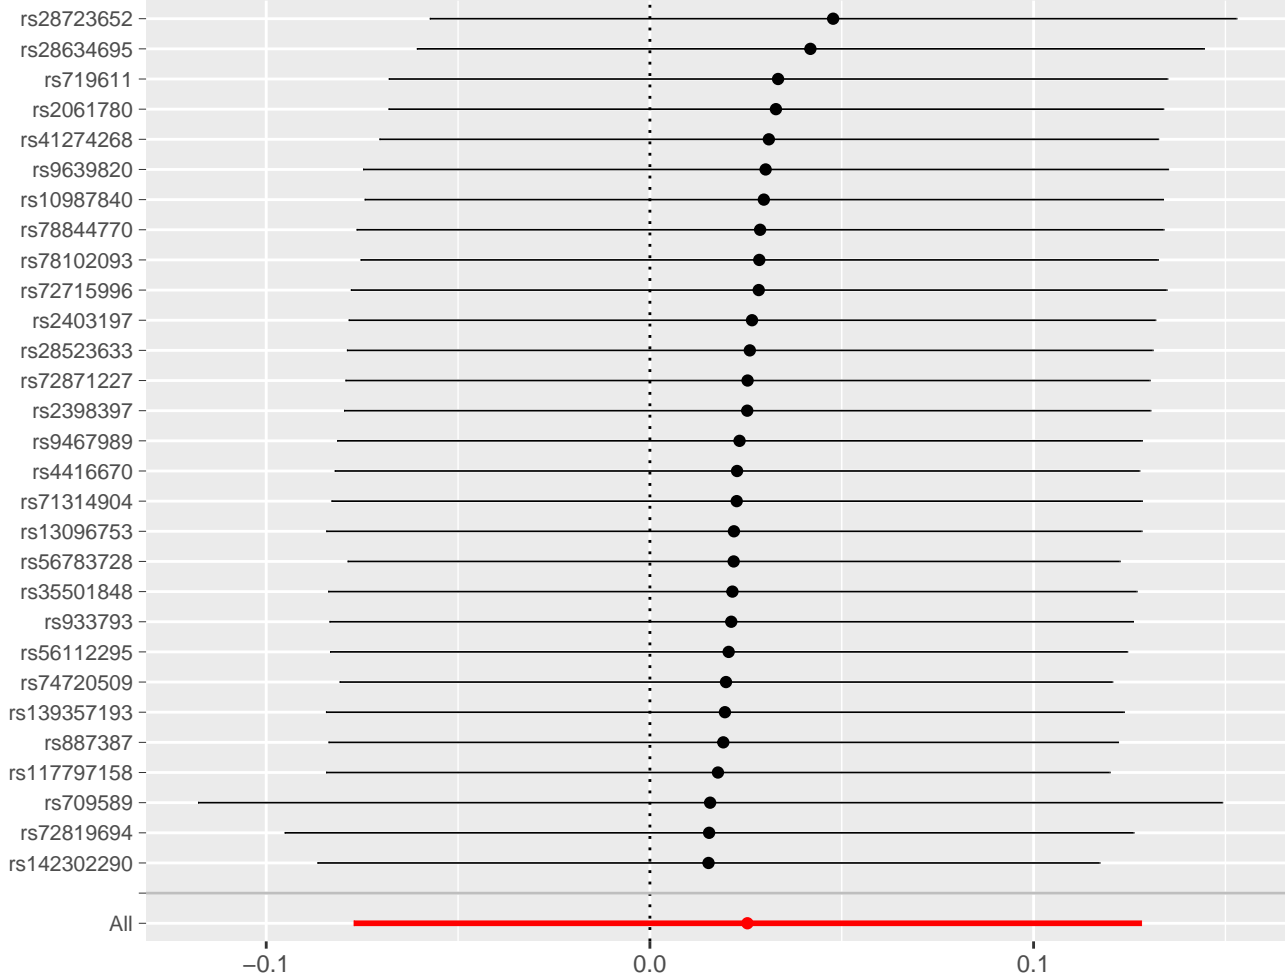

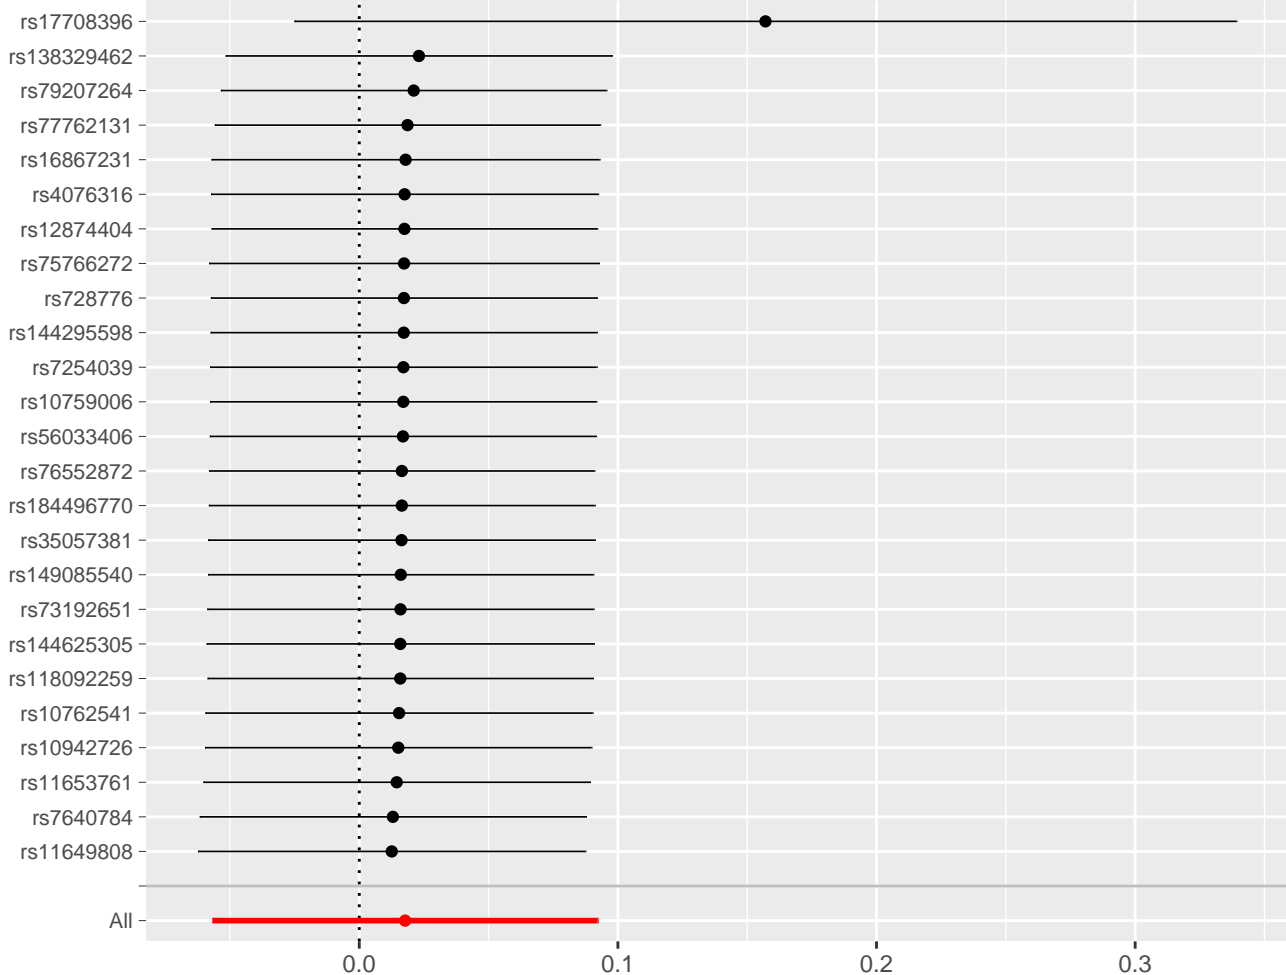

MR leave-one-out sensitivity analysis for 'CD24+ CD27+ AC' on 'Juvenile arthritis'

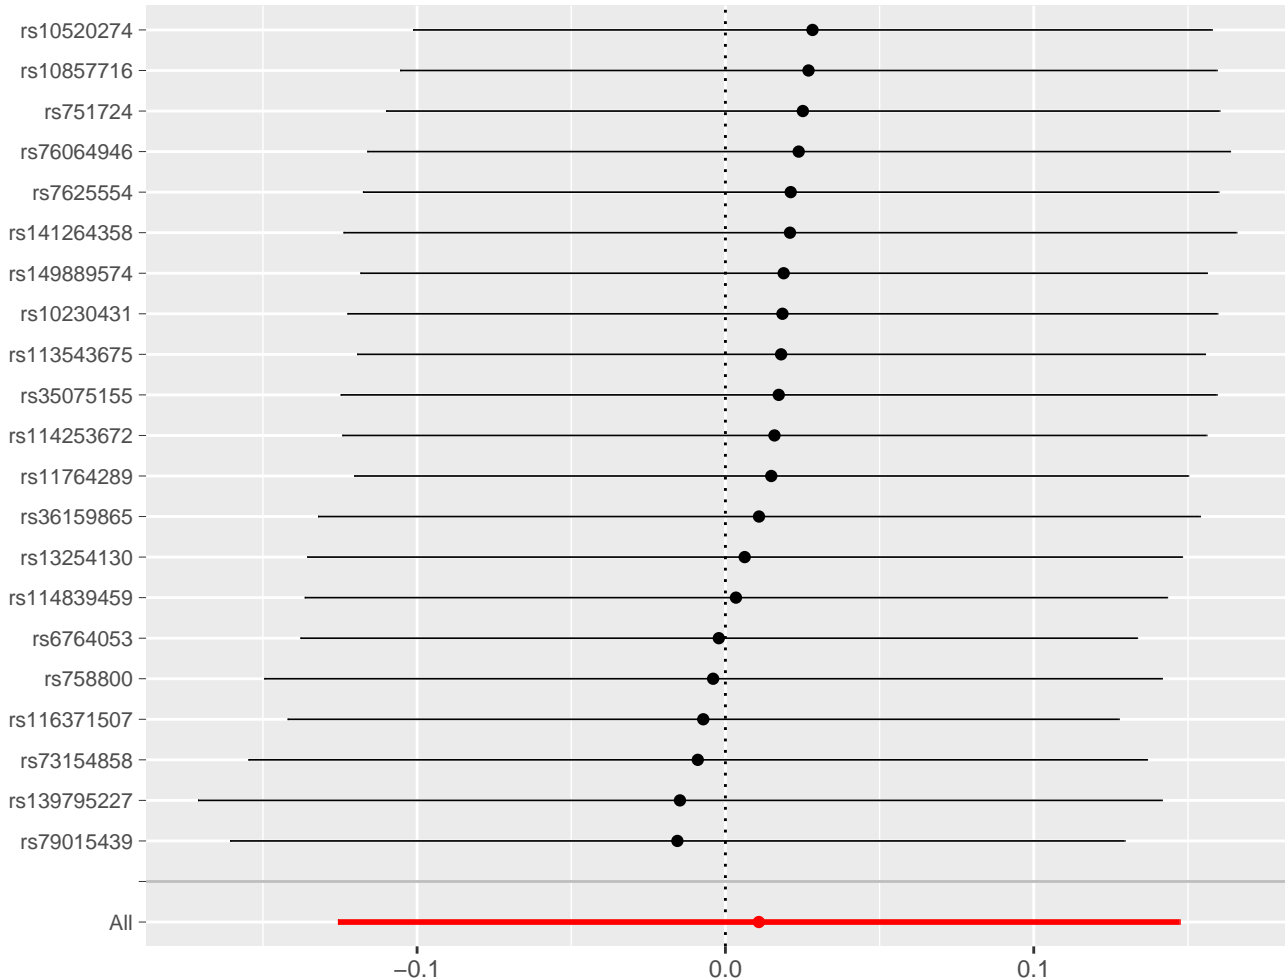

MR leave-one-out sensitivity analysis for 'CD80 on monocyte' on 'Juvenile arthritis'

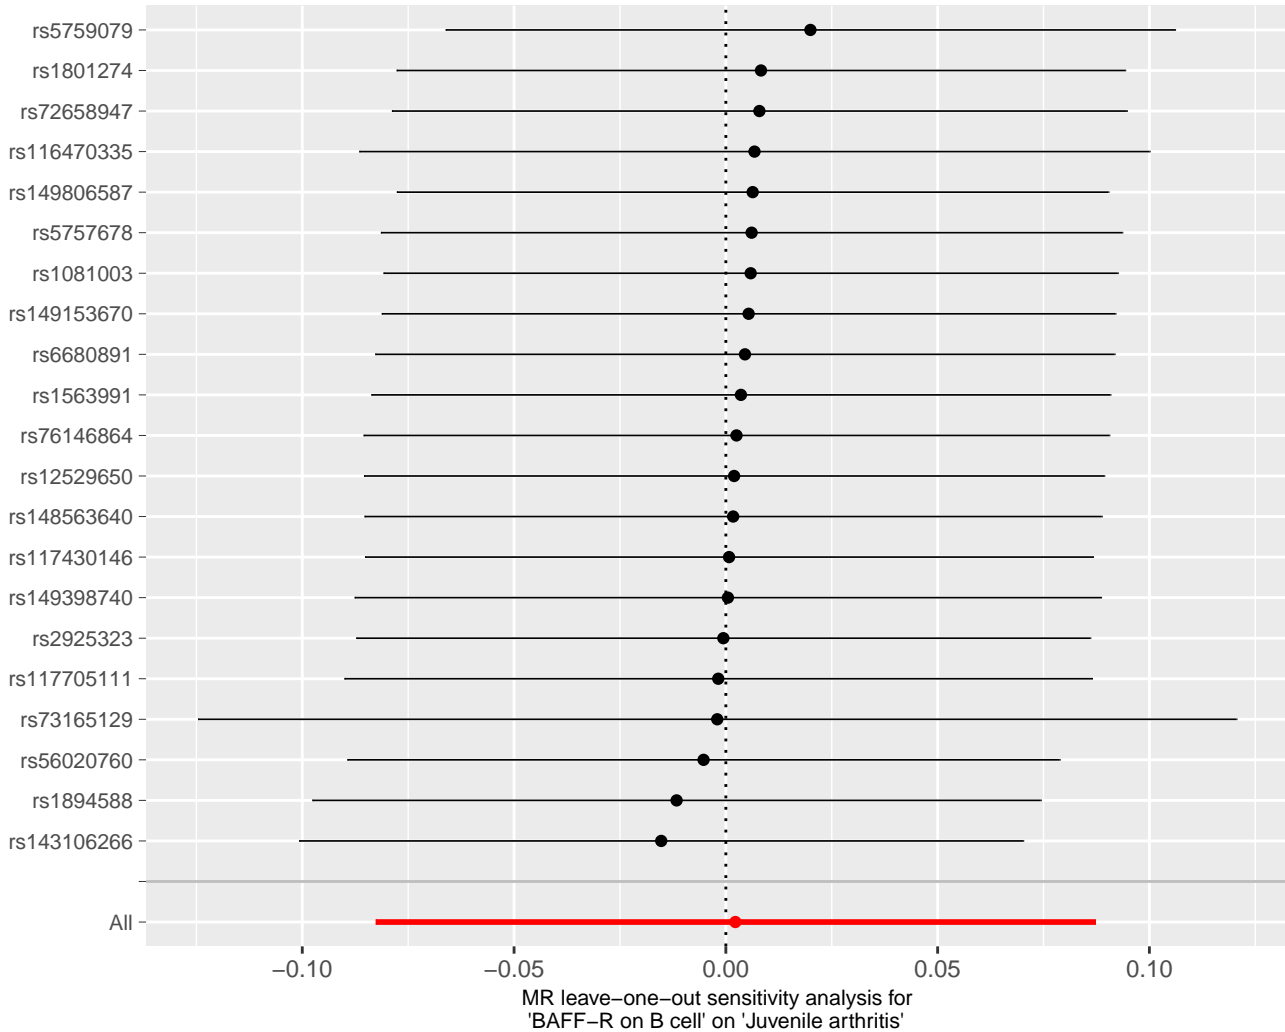

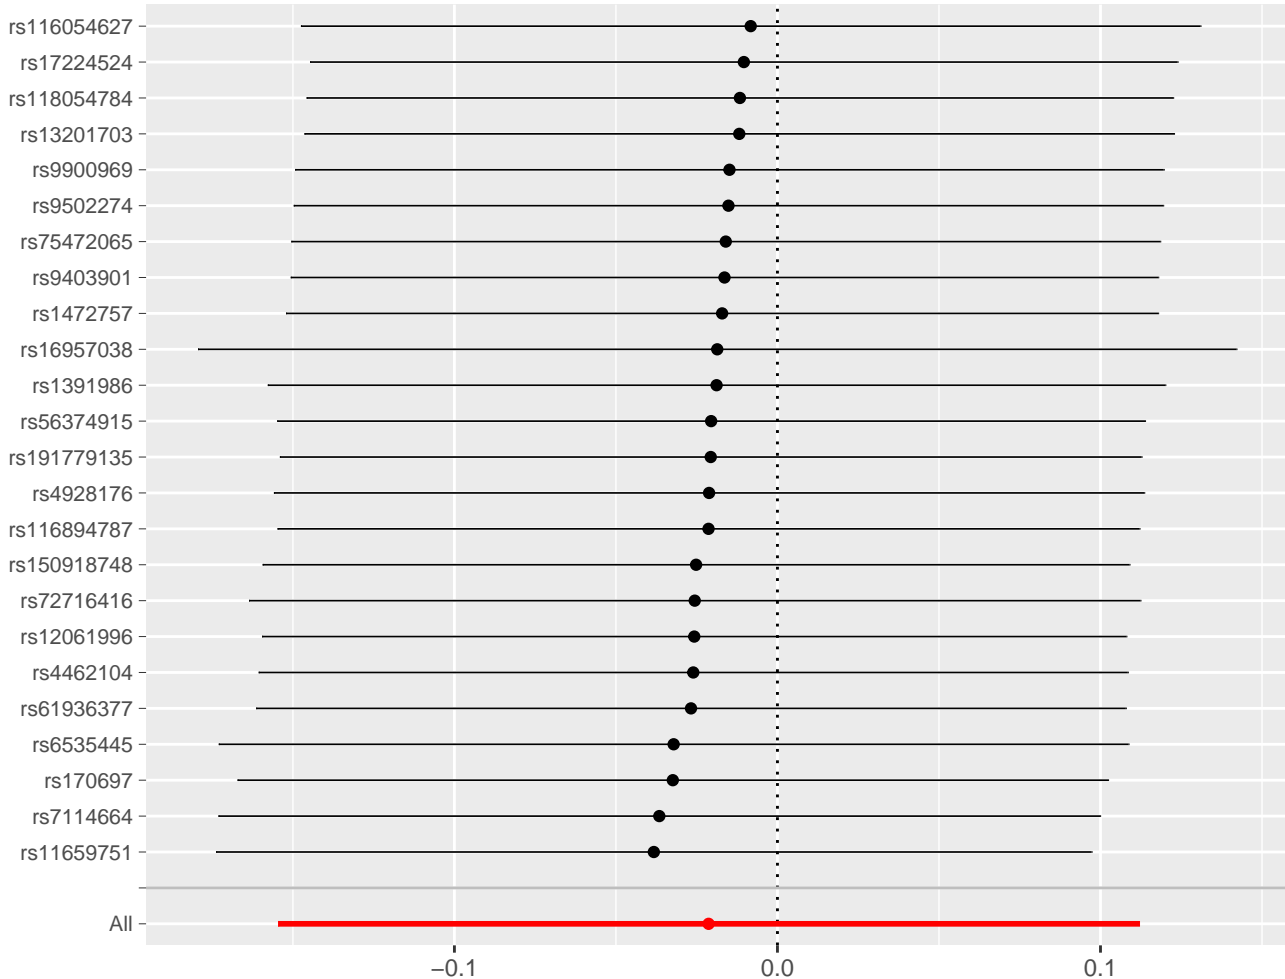

MR leave-one-out sensitivity analysis for 'CD62L-plasmacytoid DC AC' on 'Juvenile arthritis'

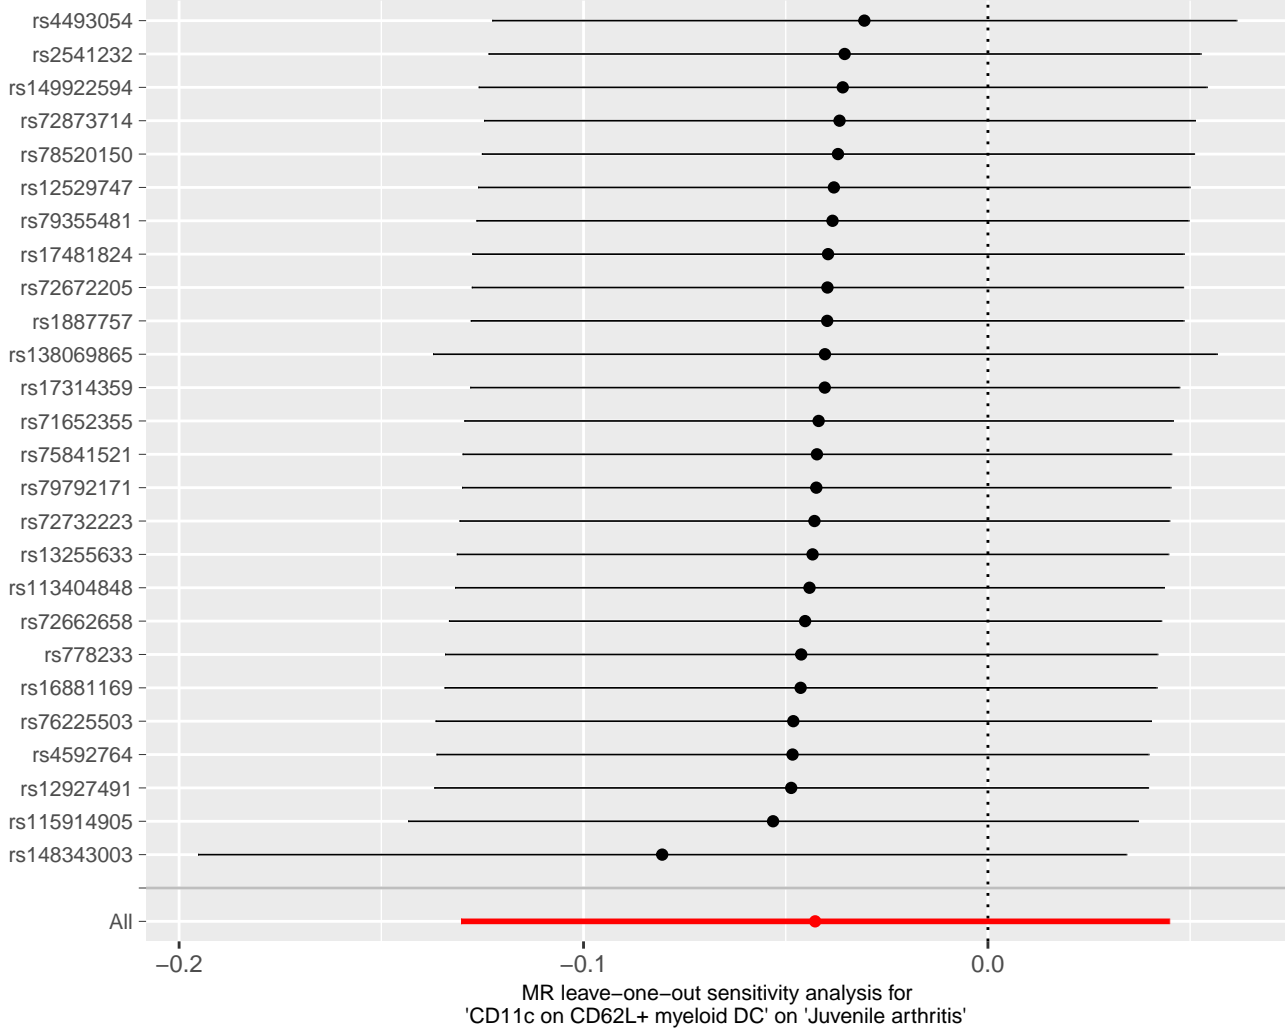

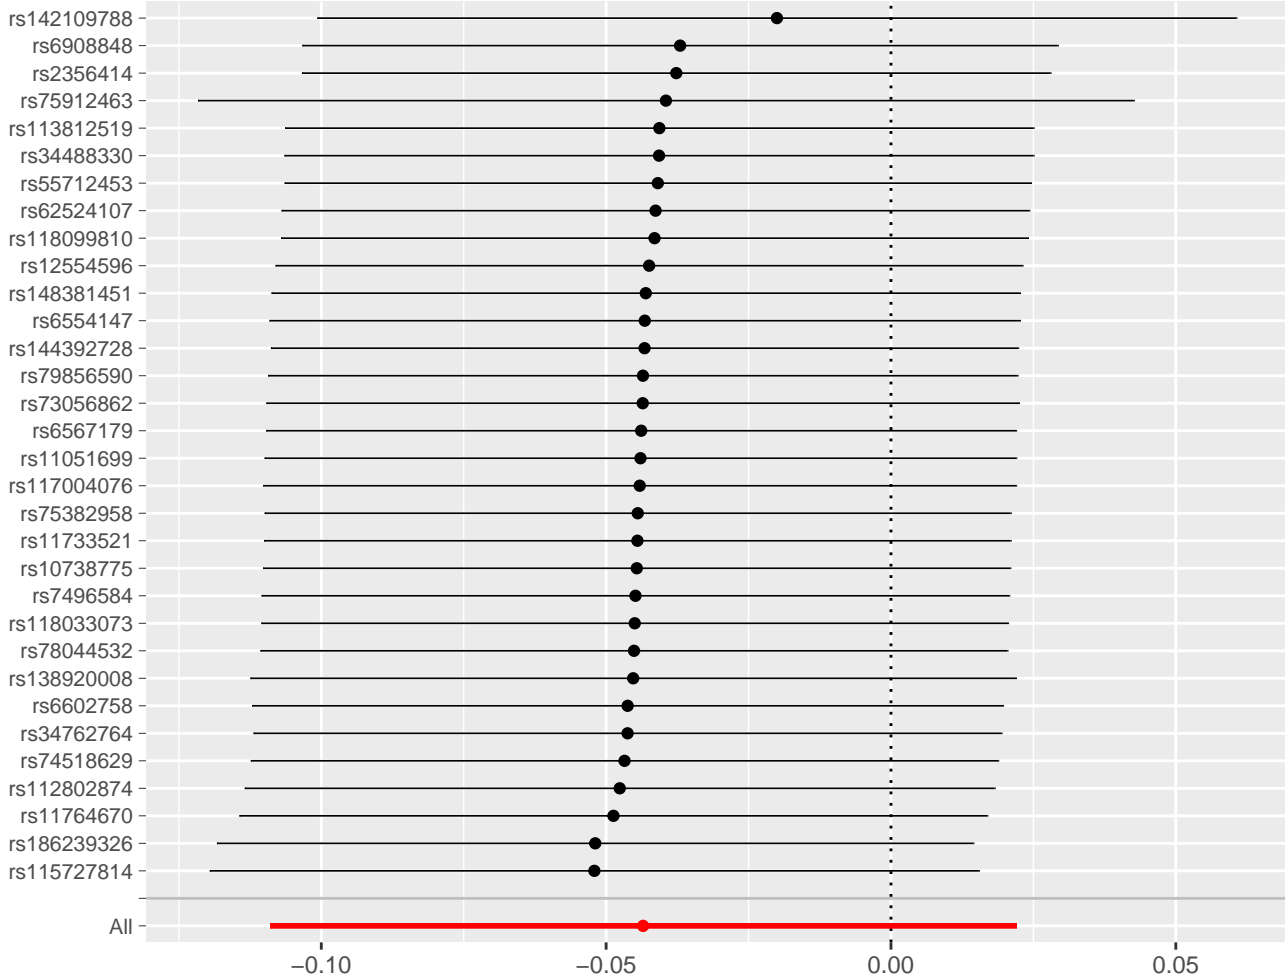

MR leave-one-out sensitivity analysis for 'CD19 on IgD+ CD38-' on 'Juvenile arthritis'



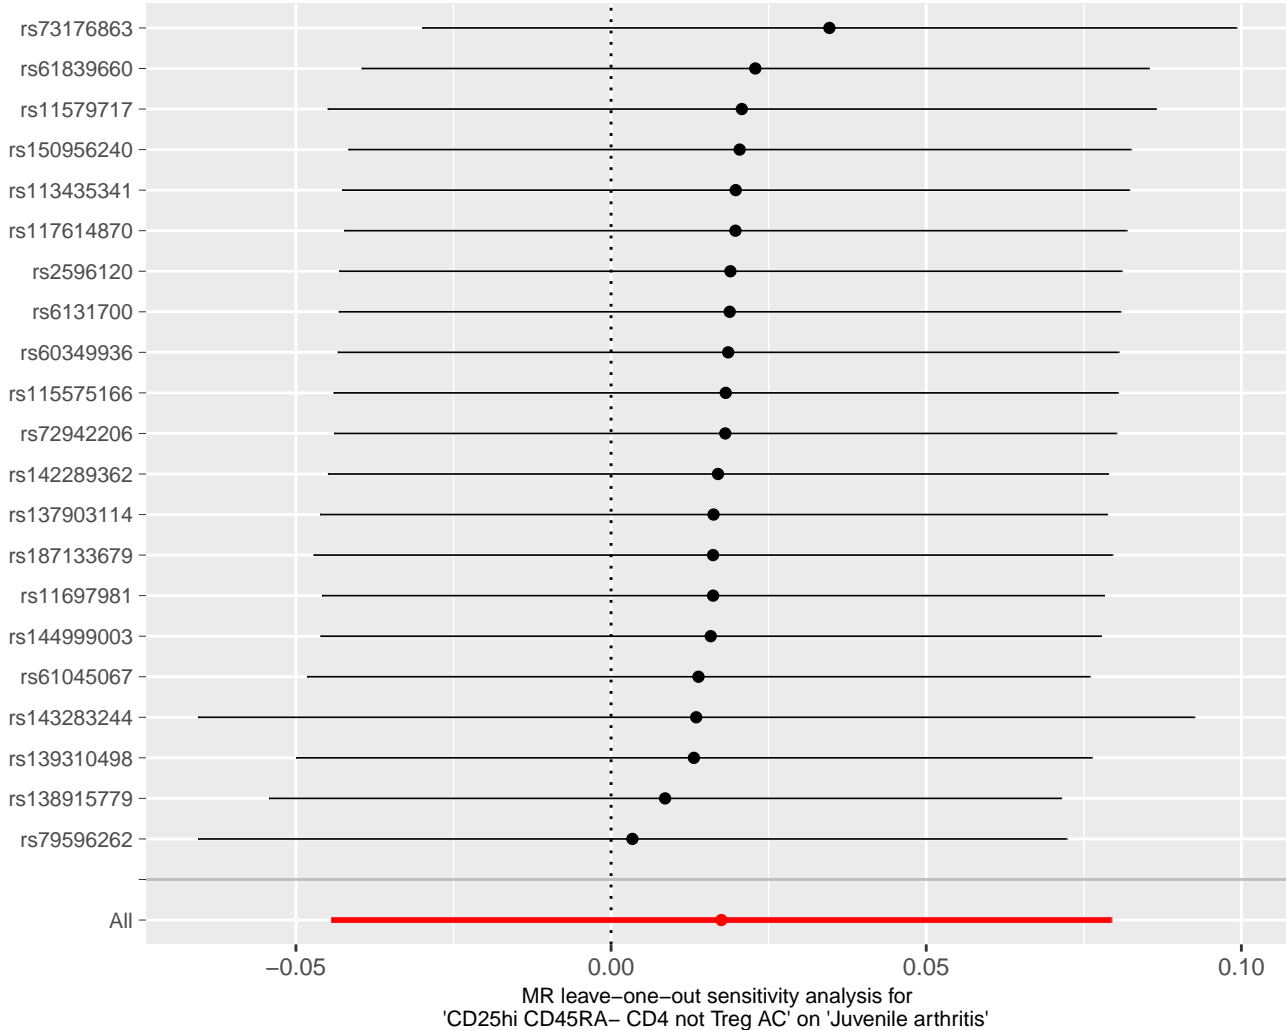

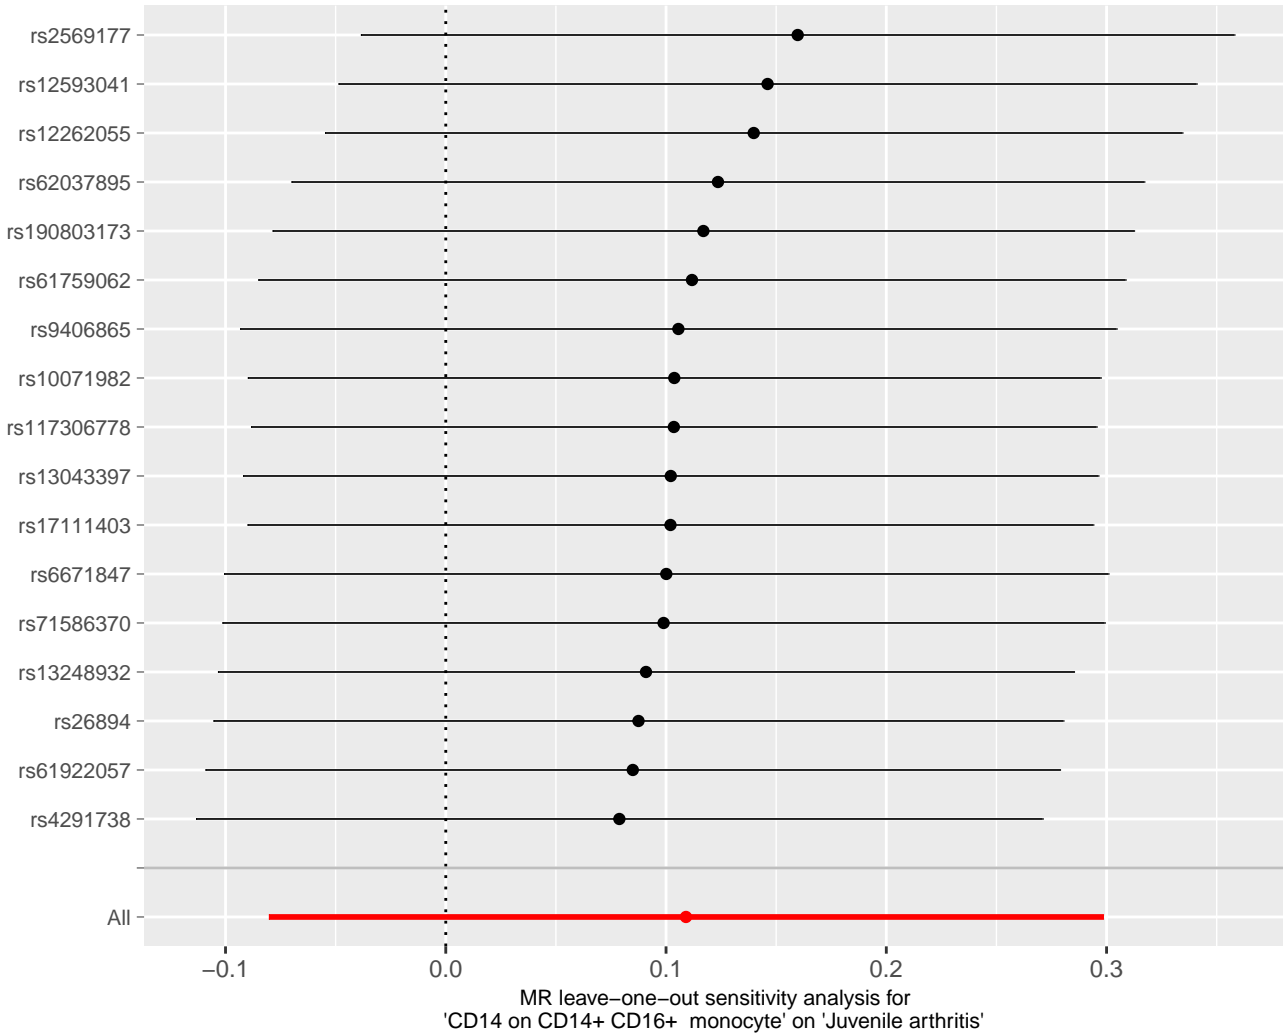

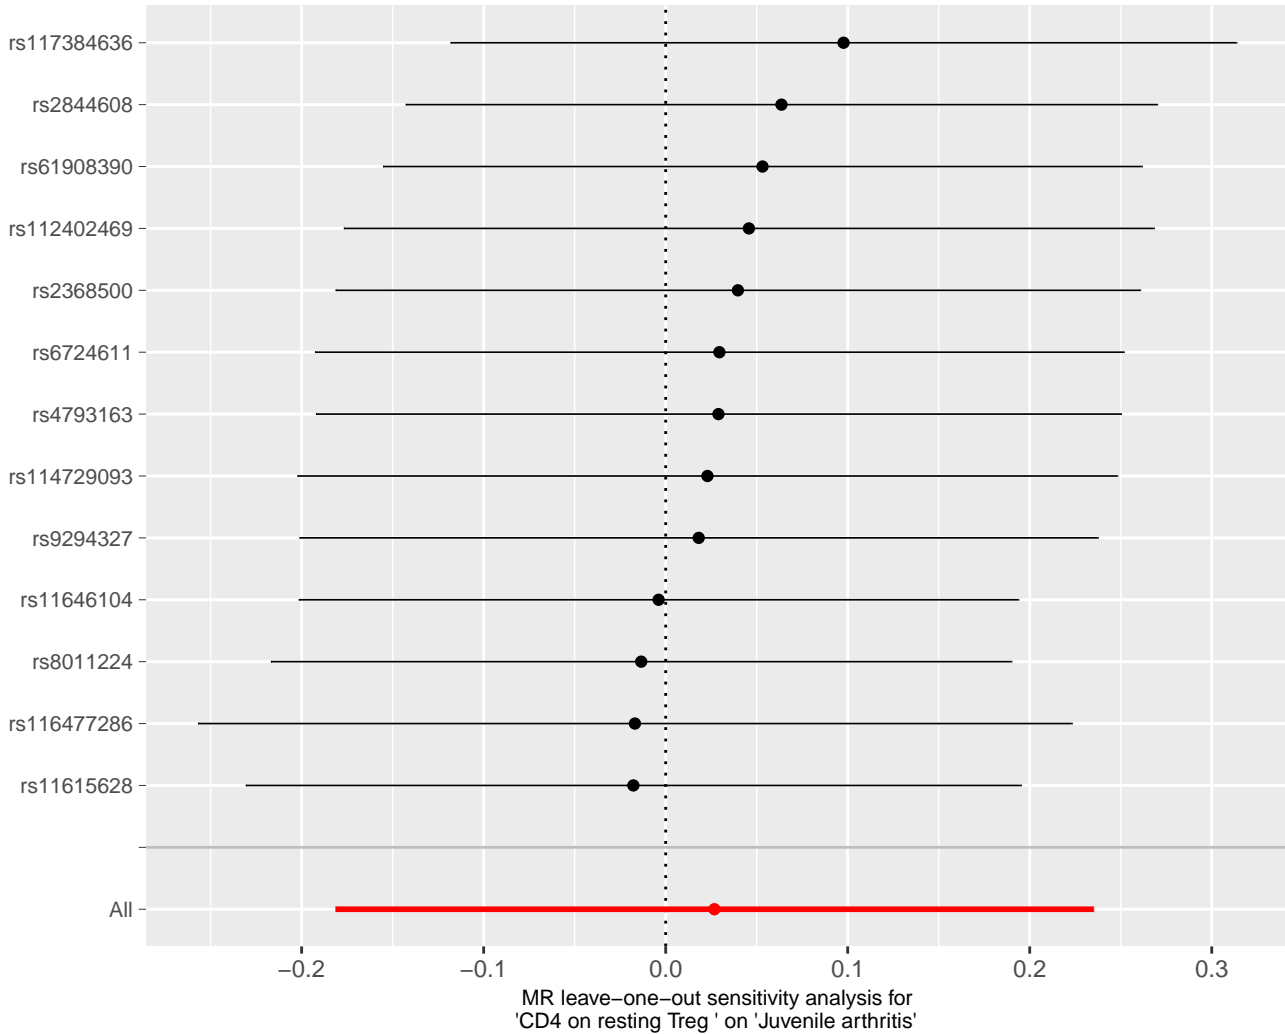

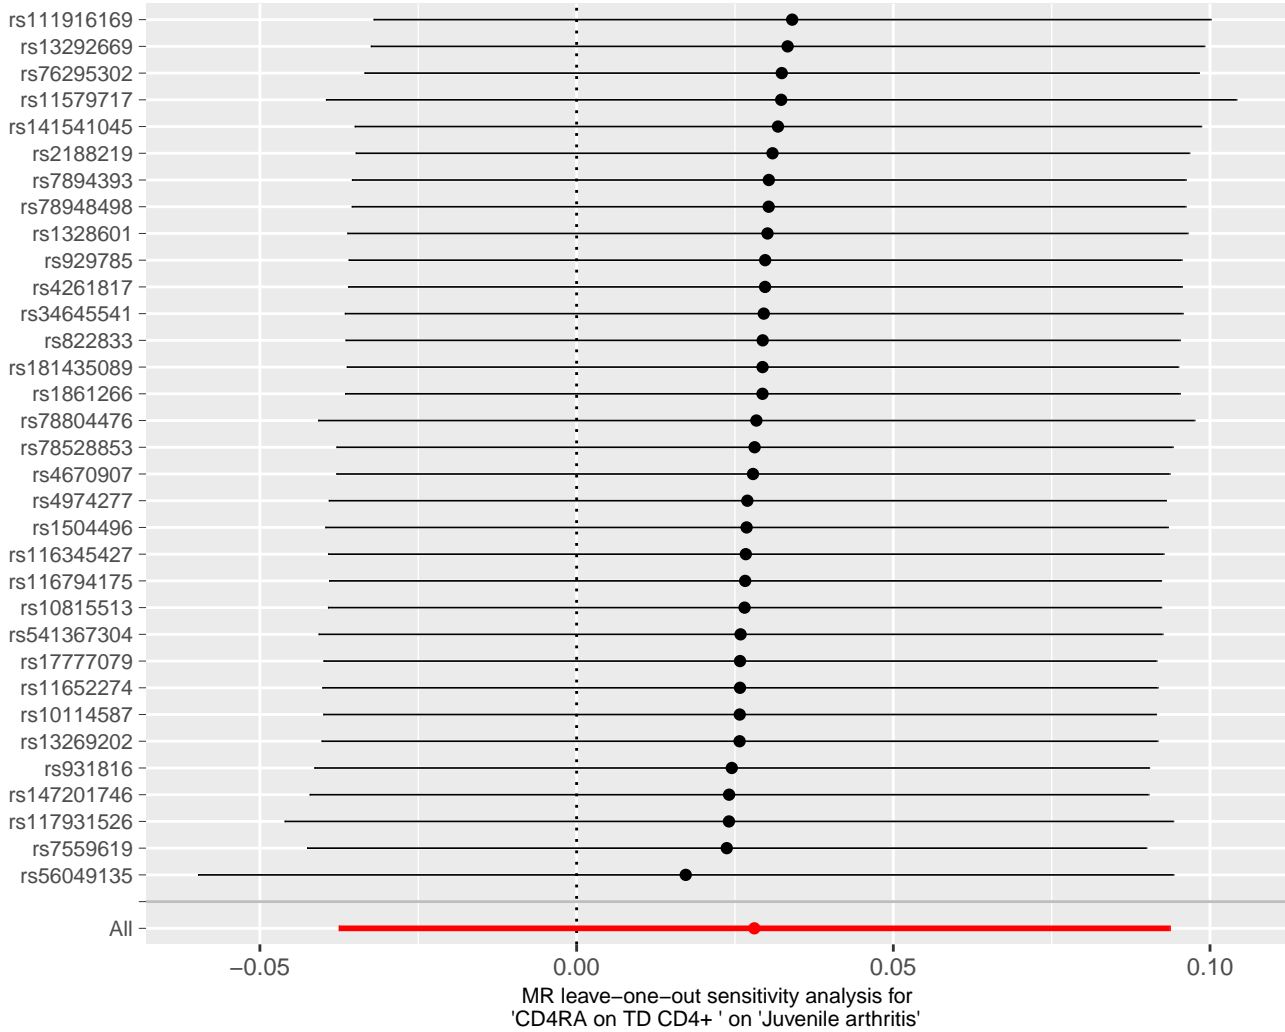

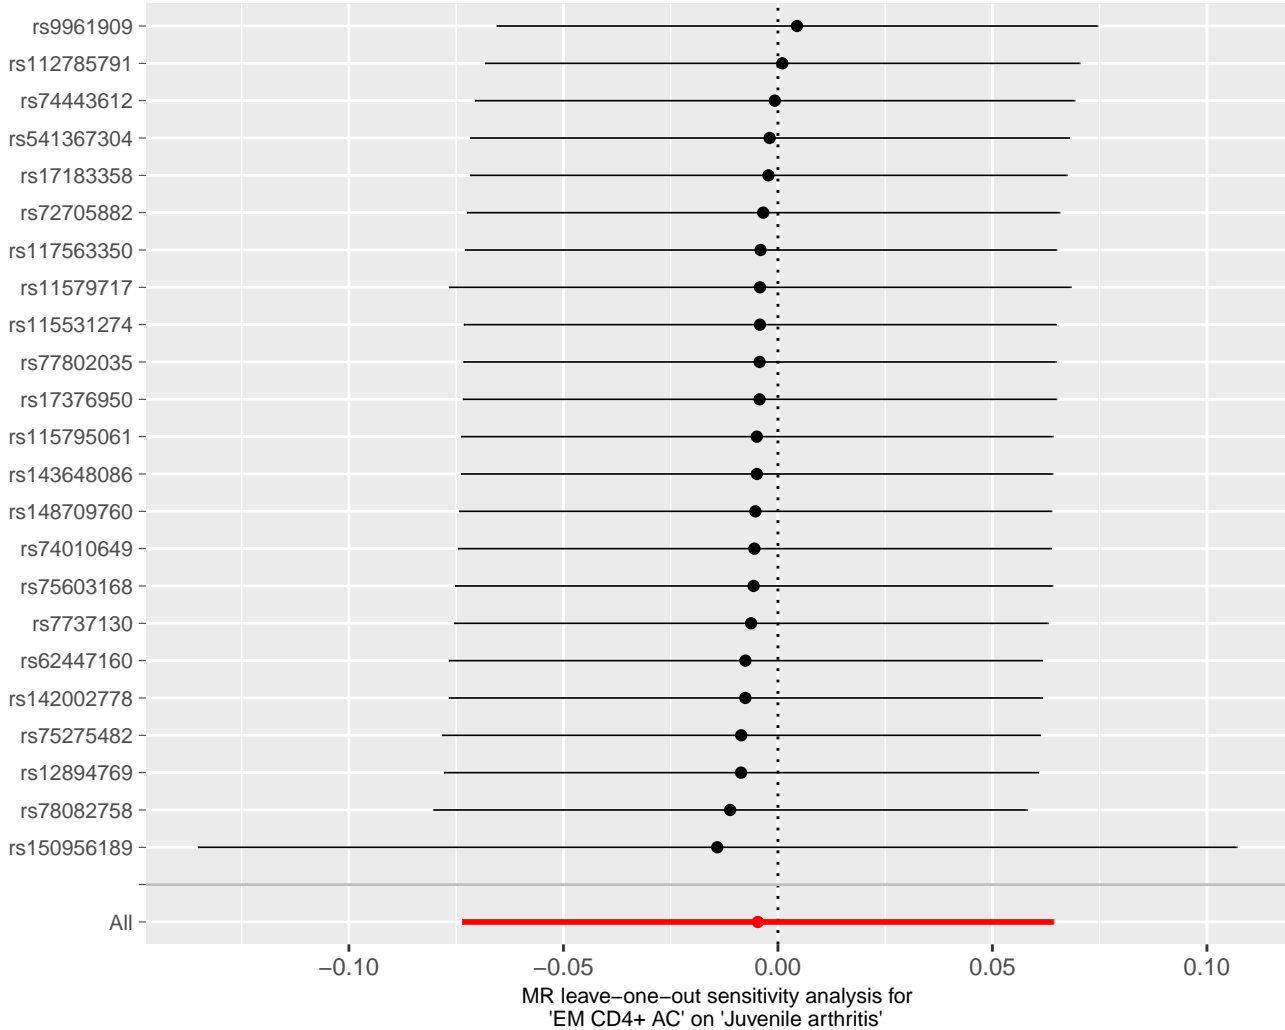

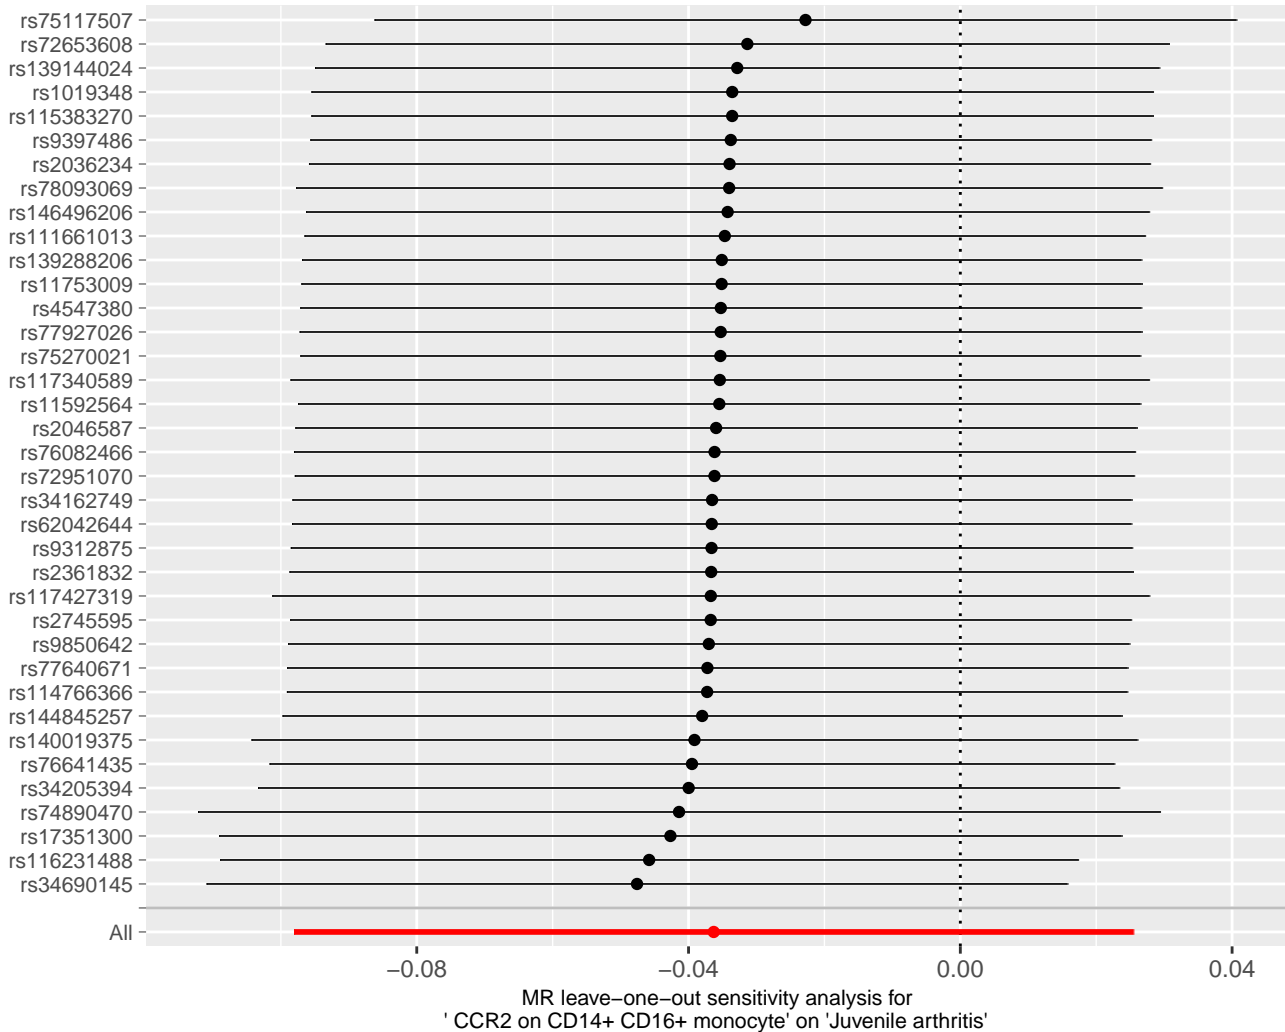

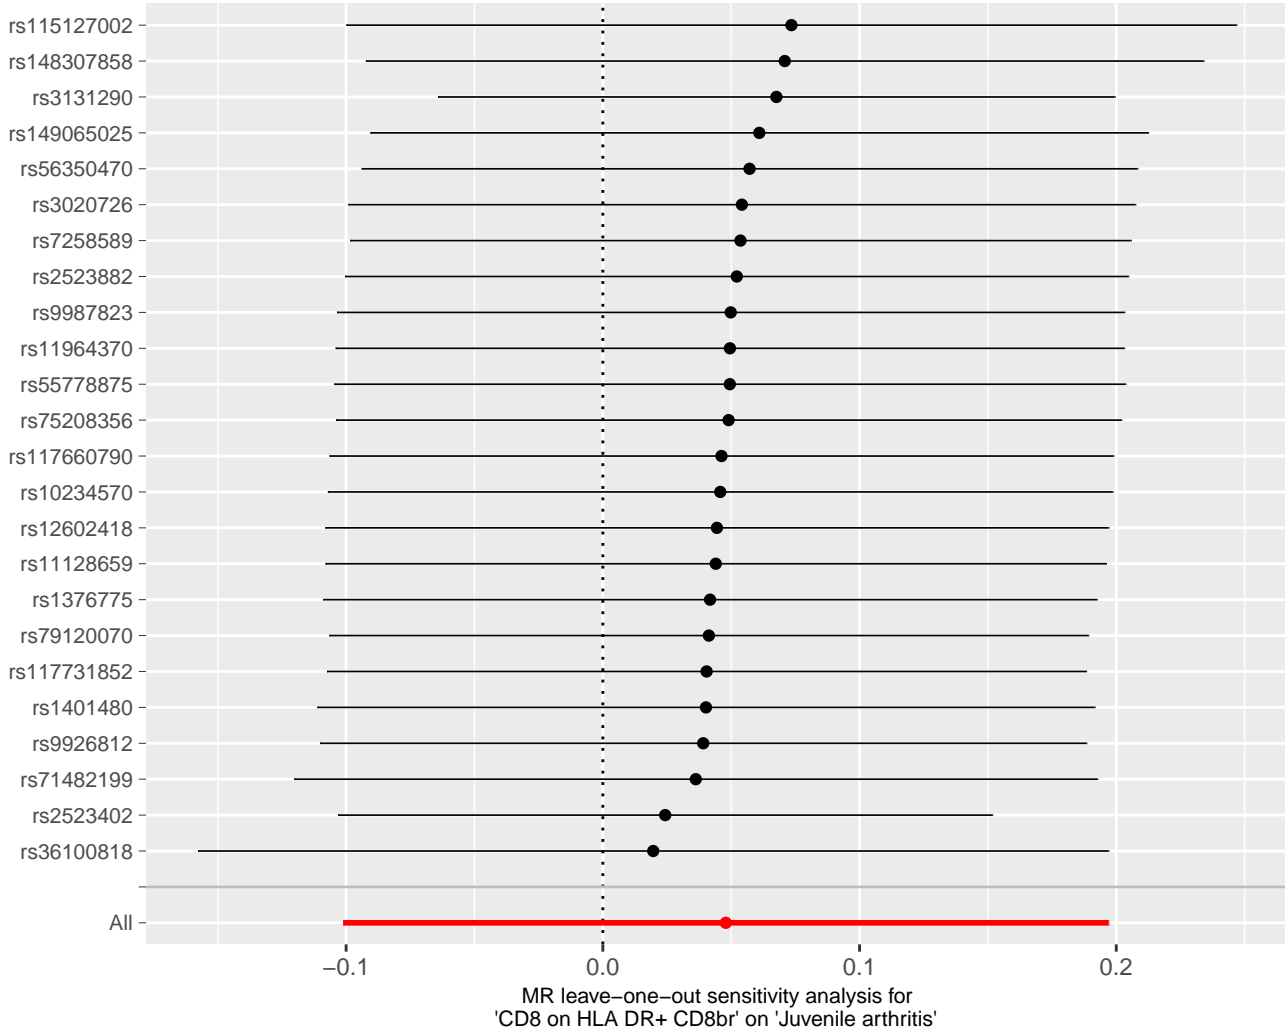

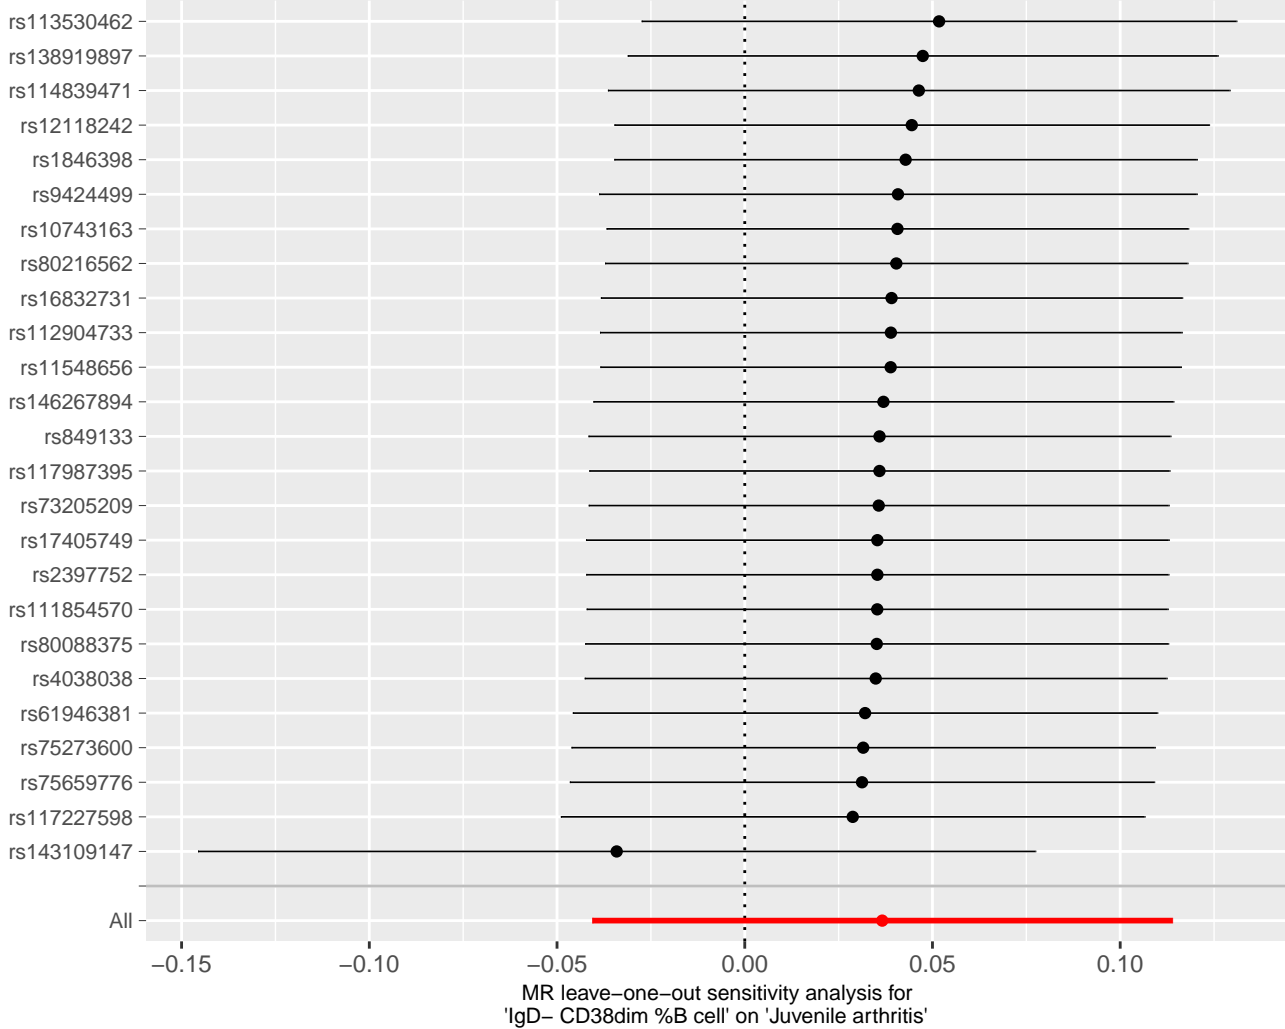



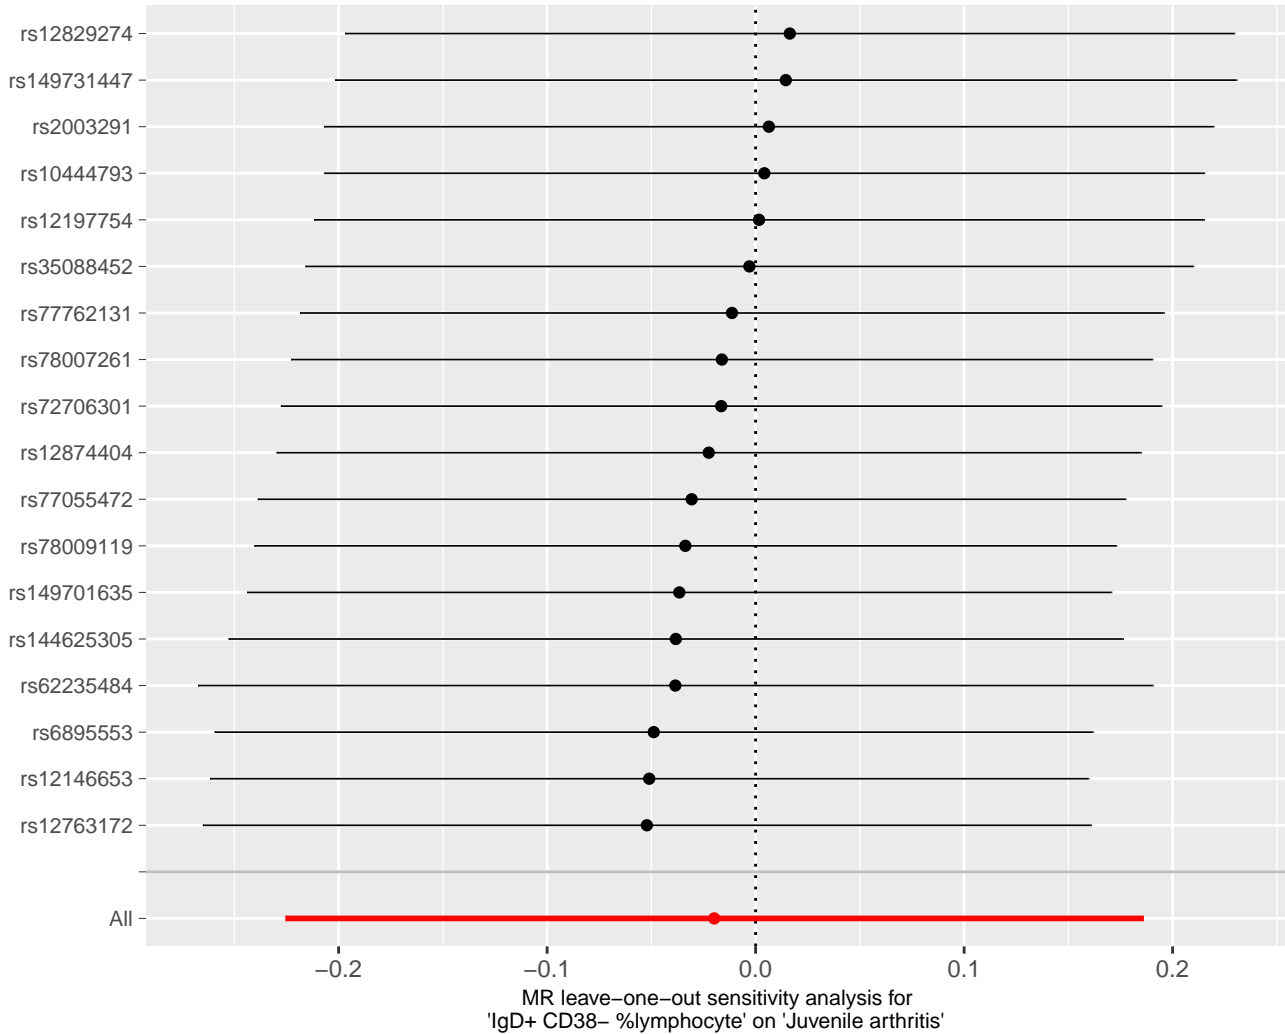

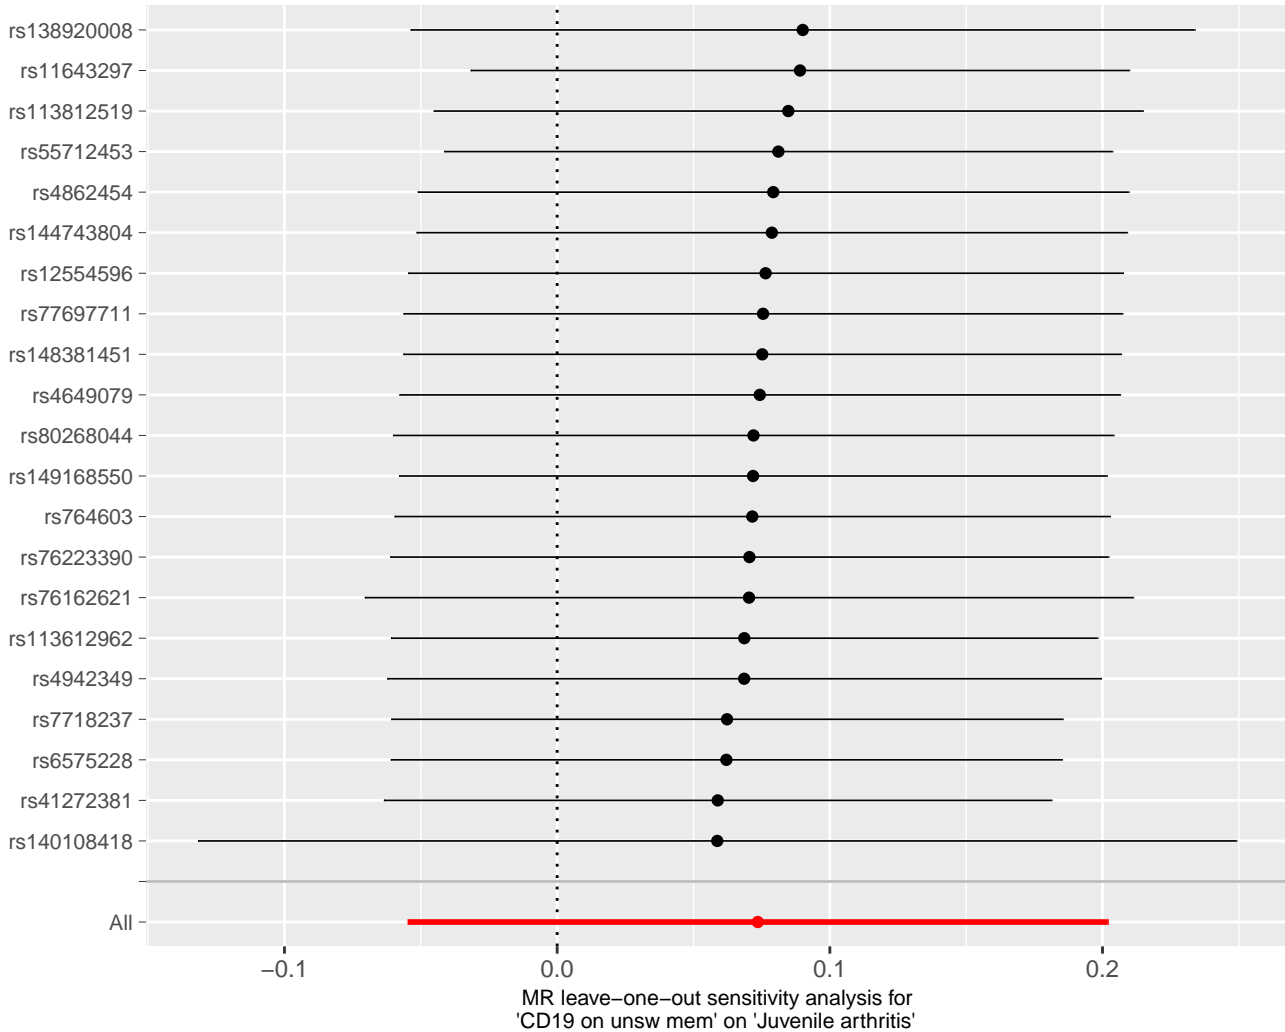

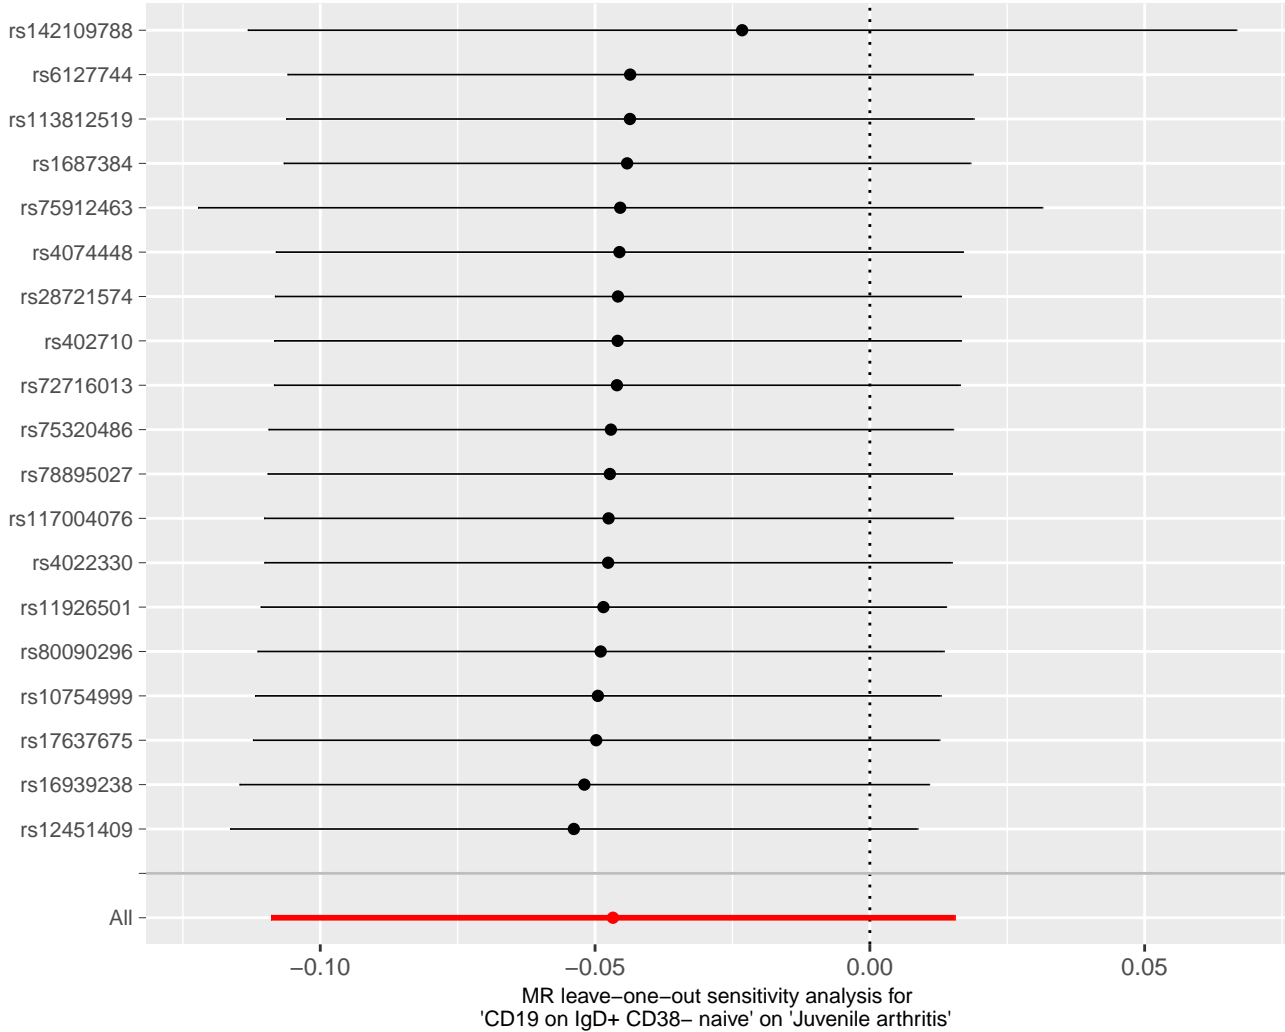

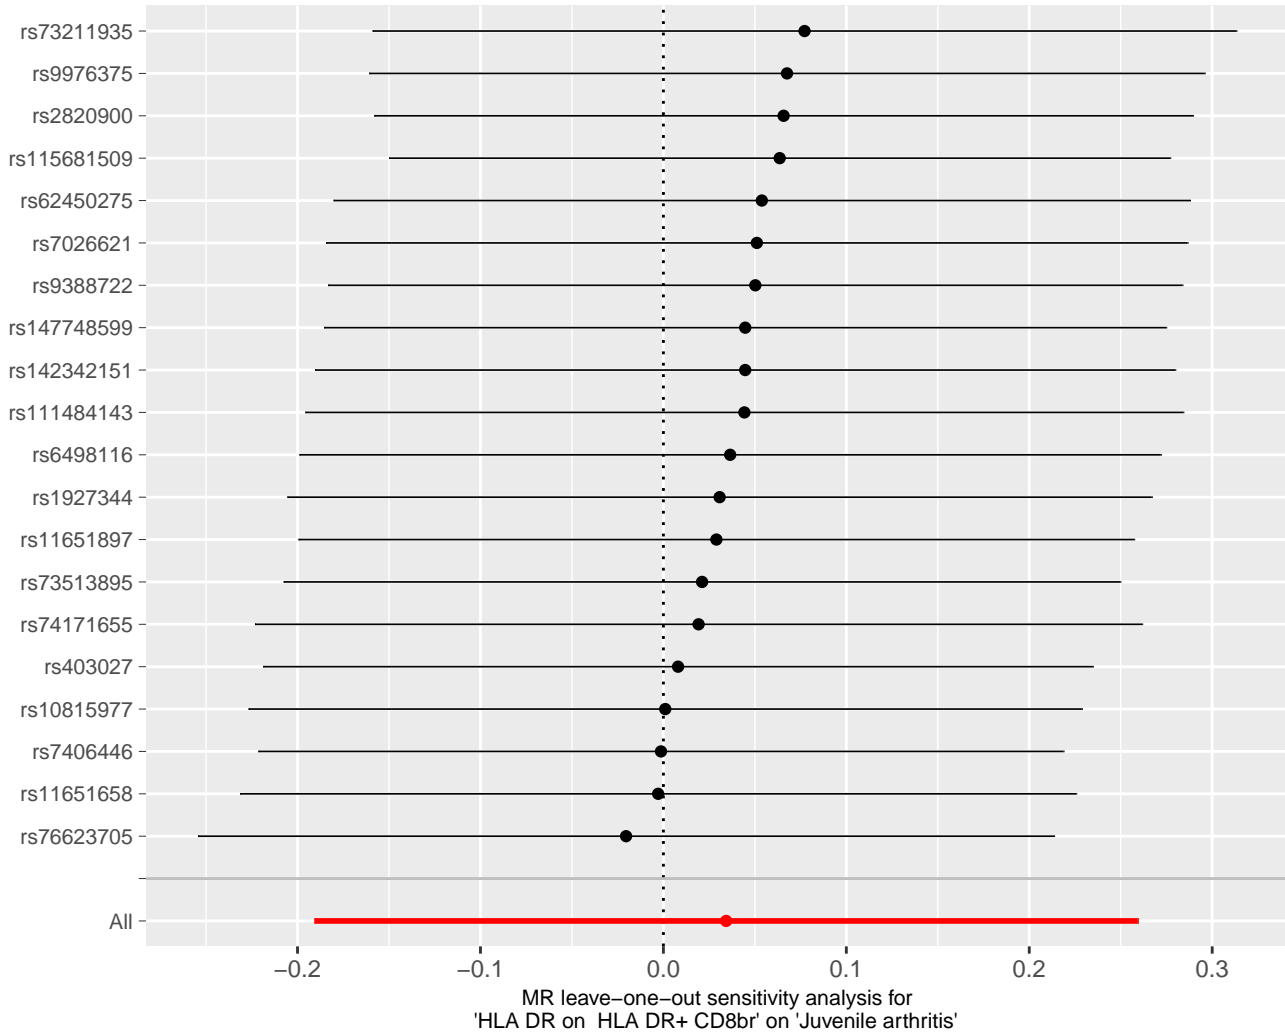

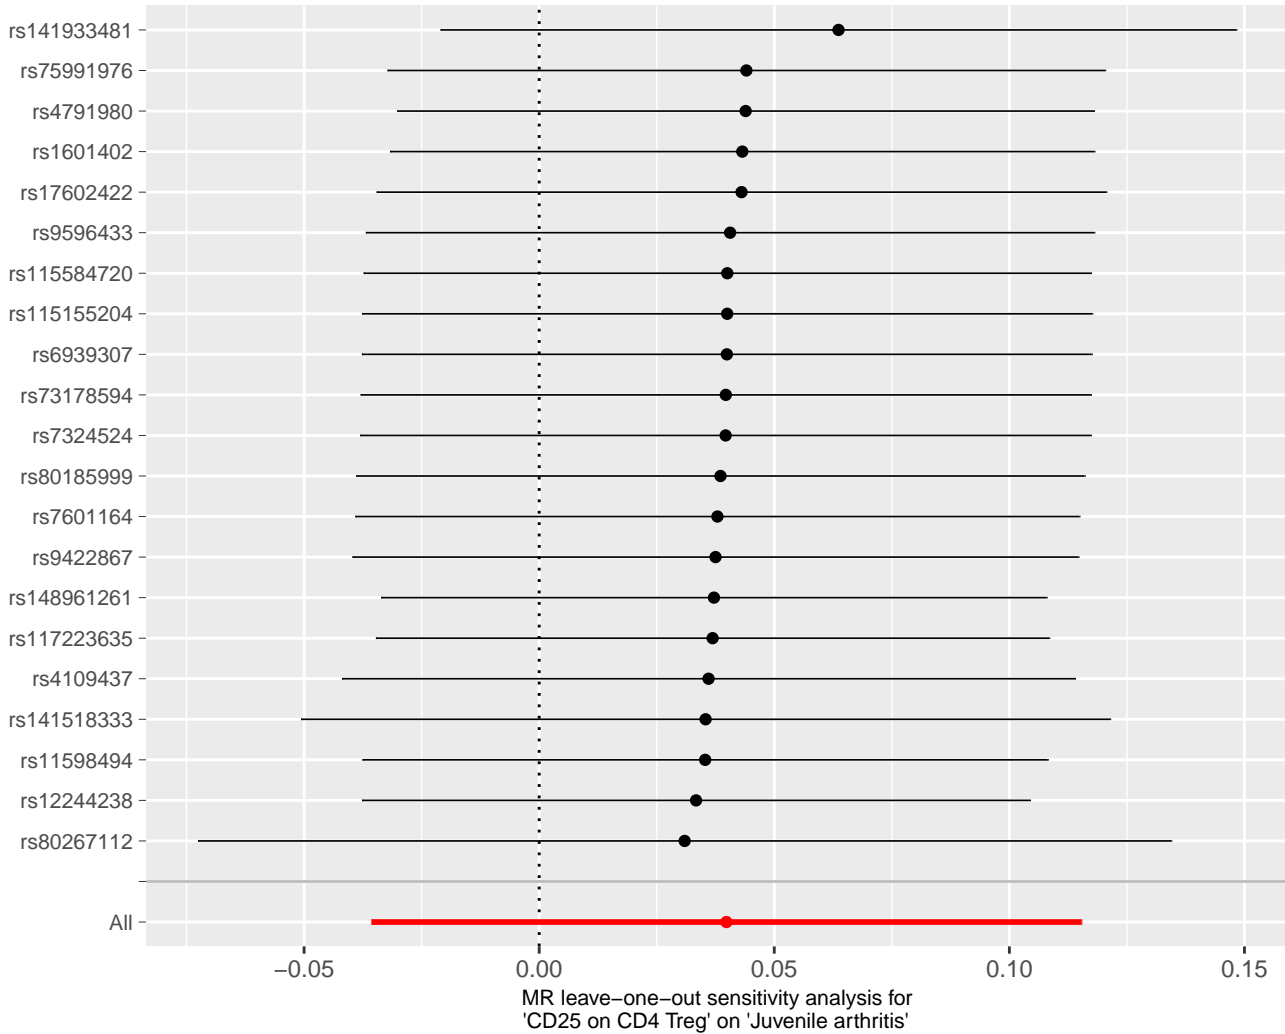

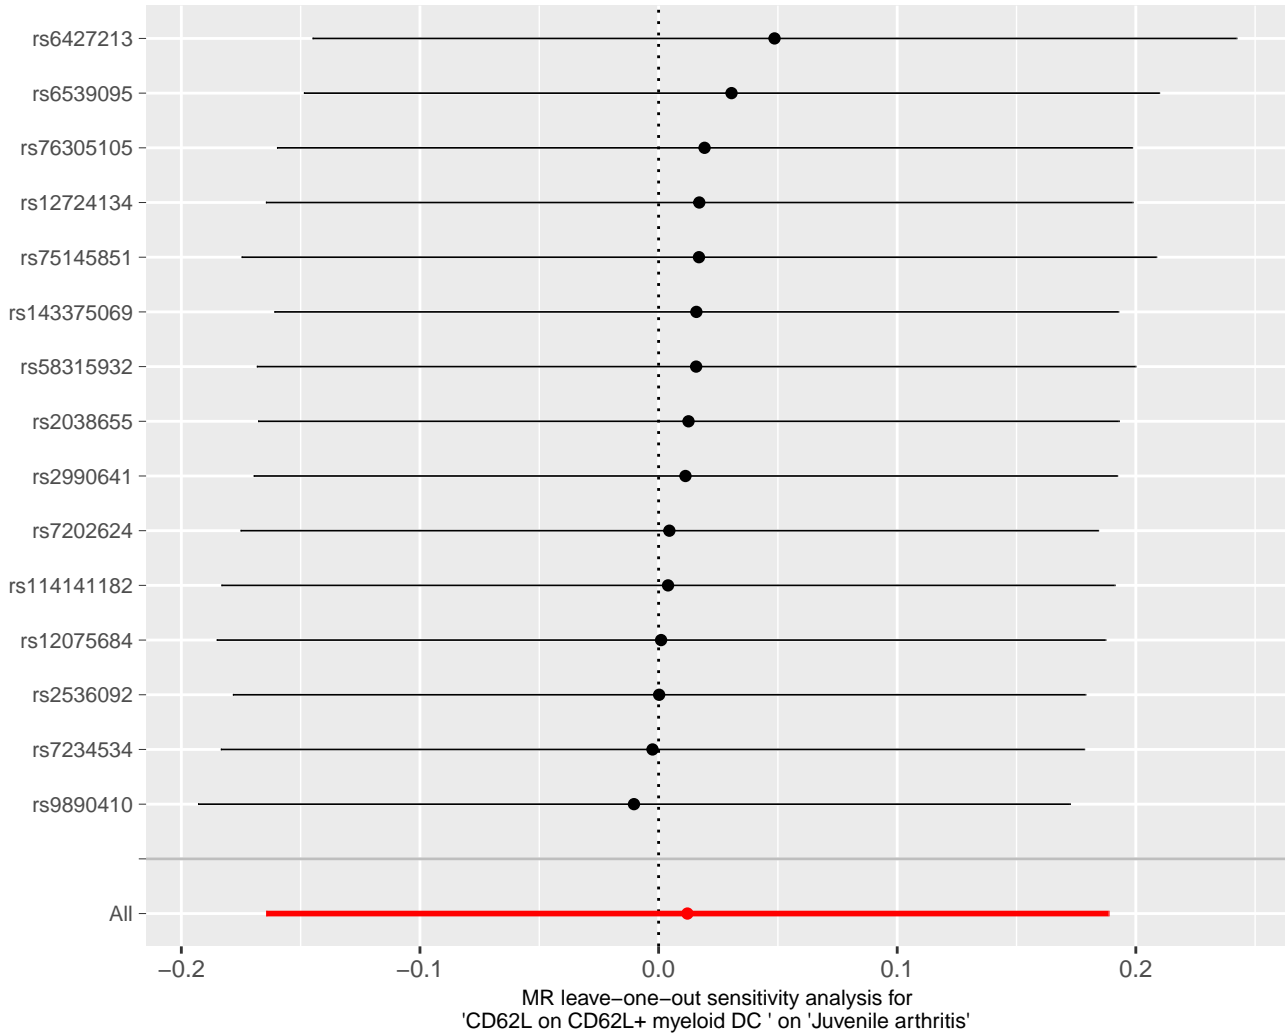

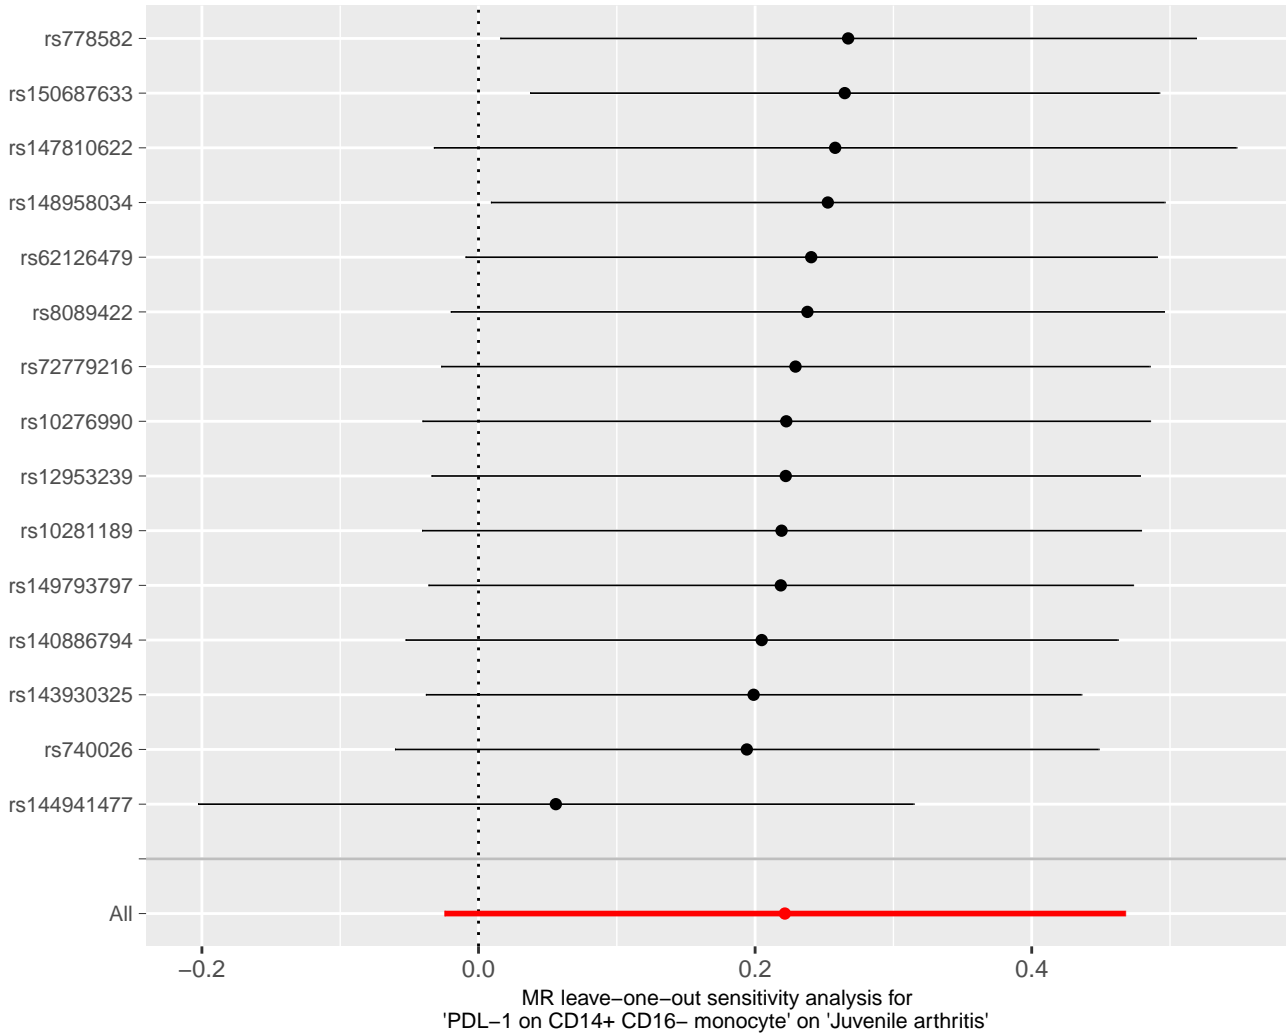

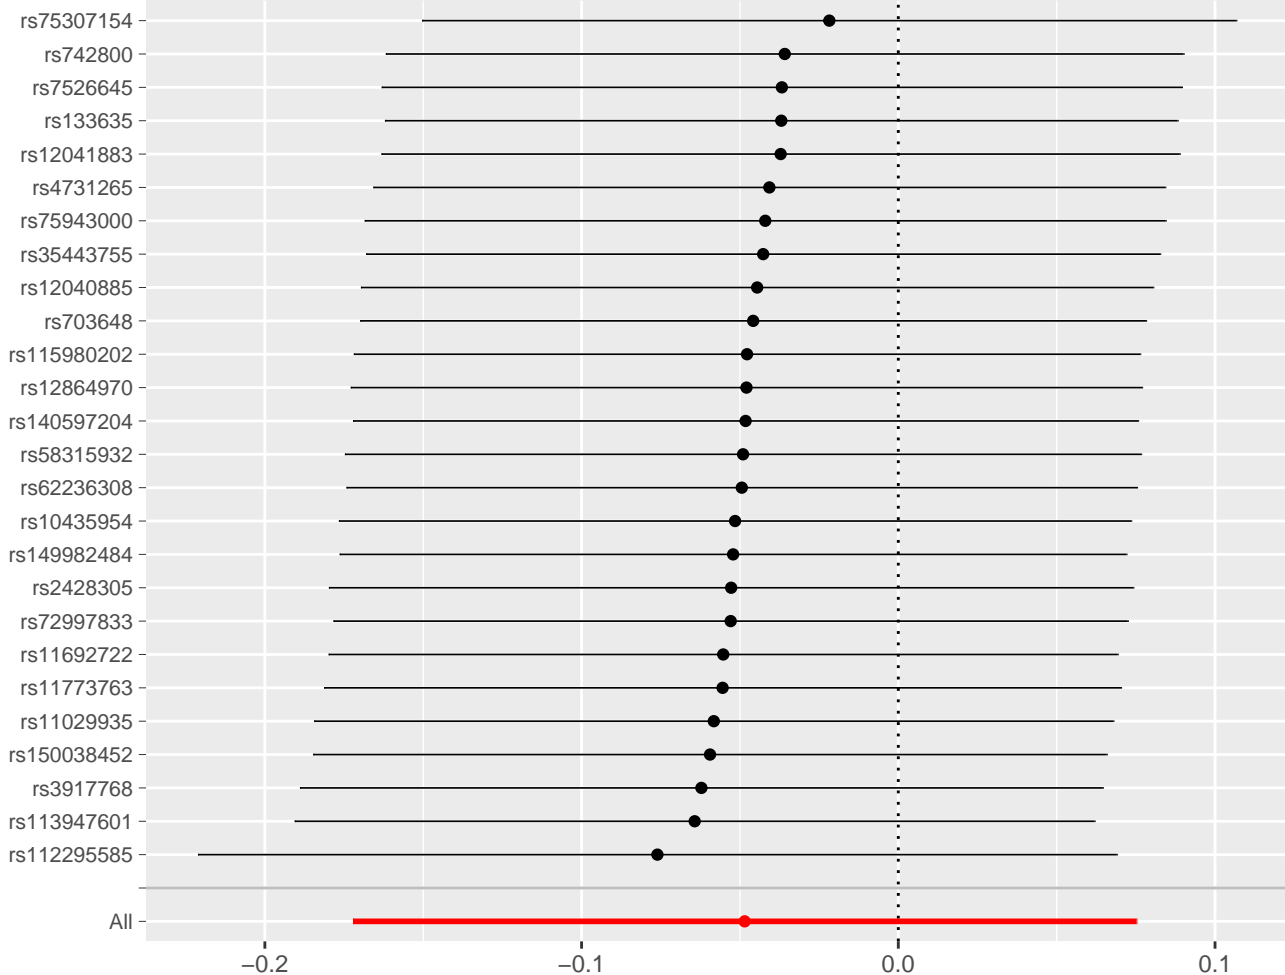

MR leave-one-out sensitivity analysis for 'CD62L on CD62L+ DC' on 'Juvenile arthritis'



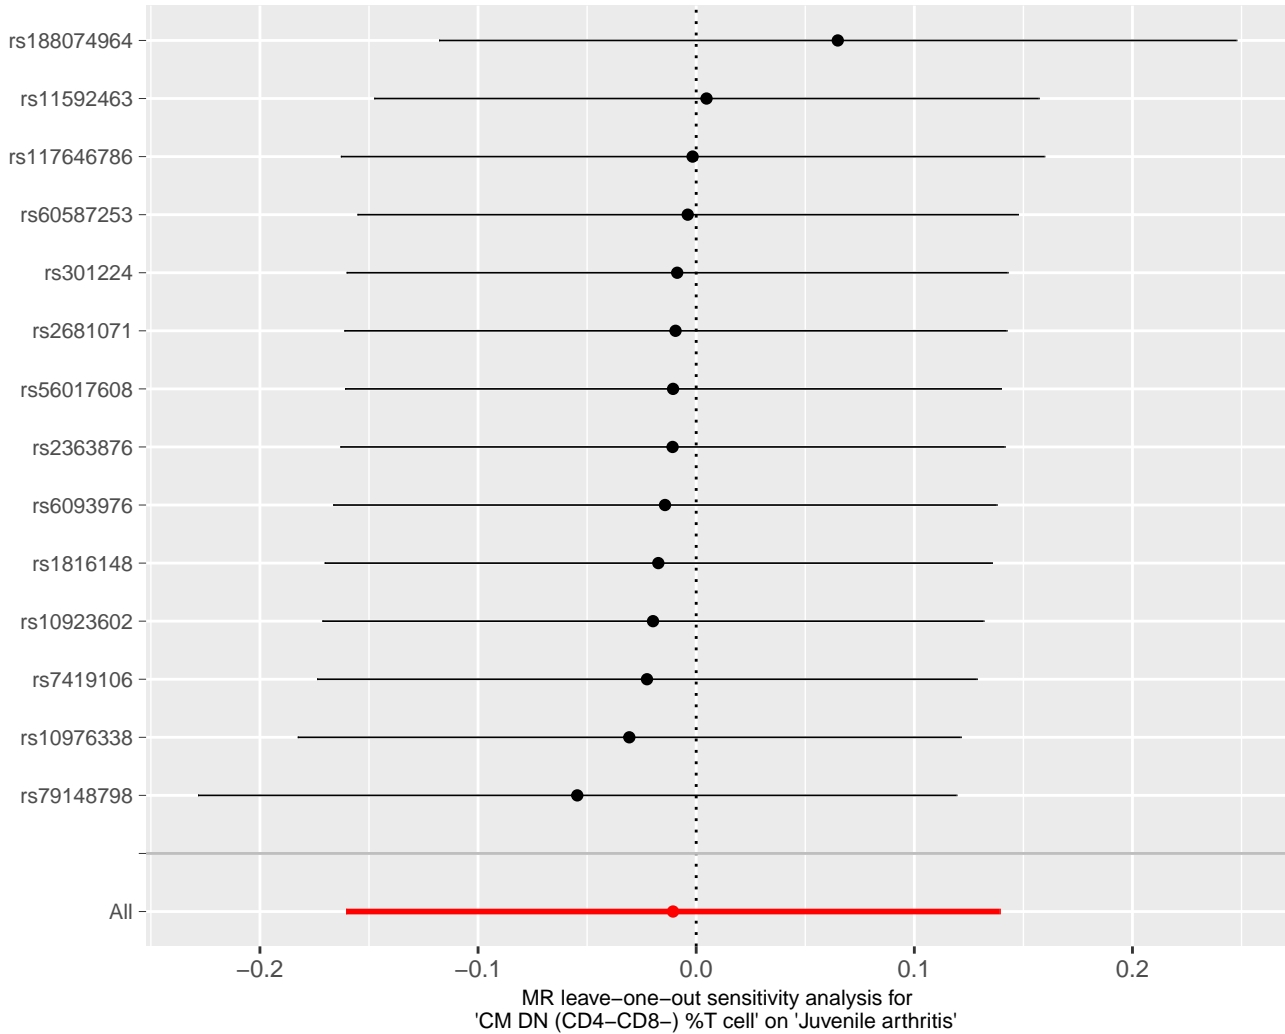

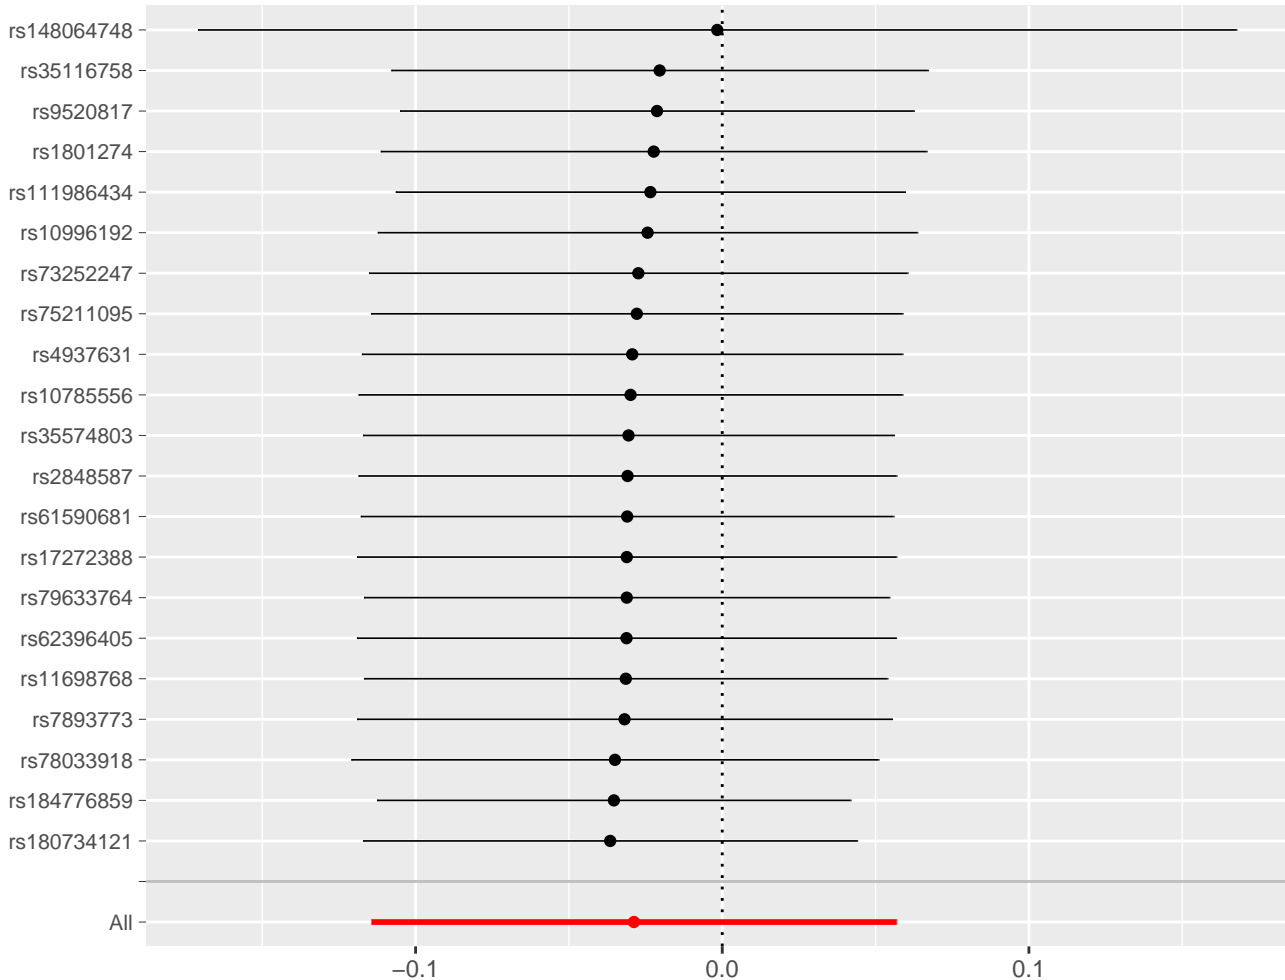

MR leave-one-out sensitivity analysis for 'CD27 on T cell' on 'Juvenile arthritis'

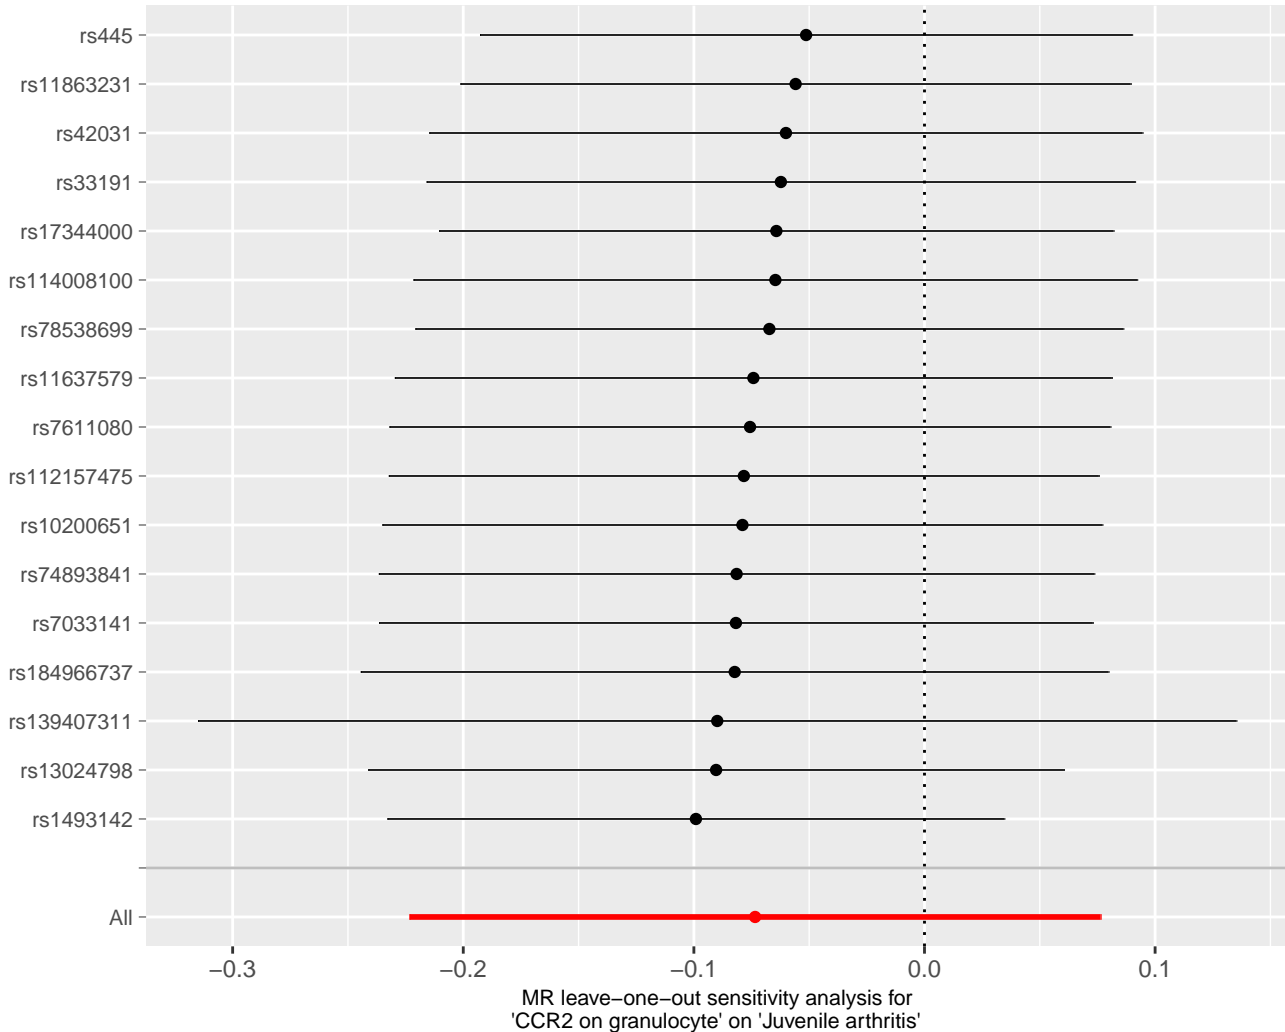

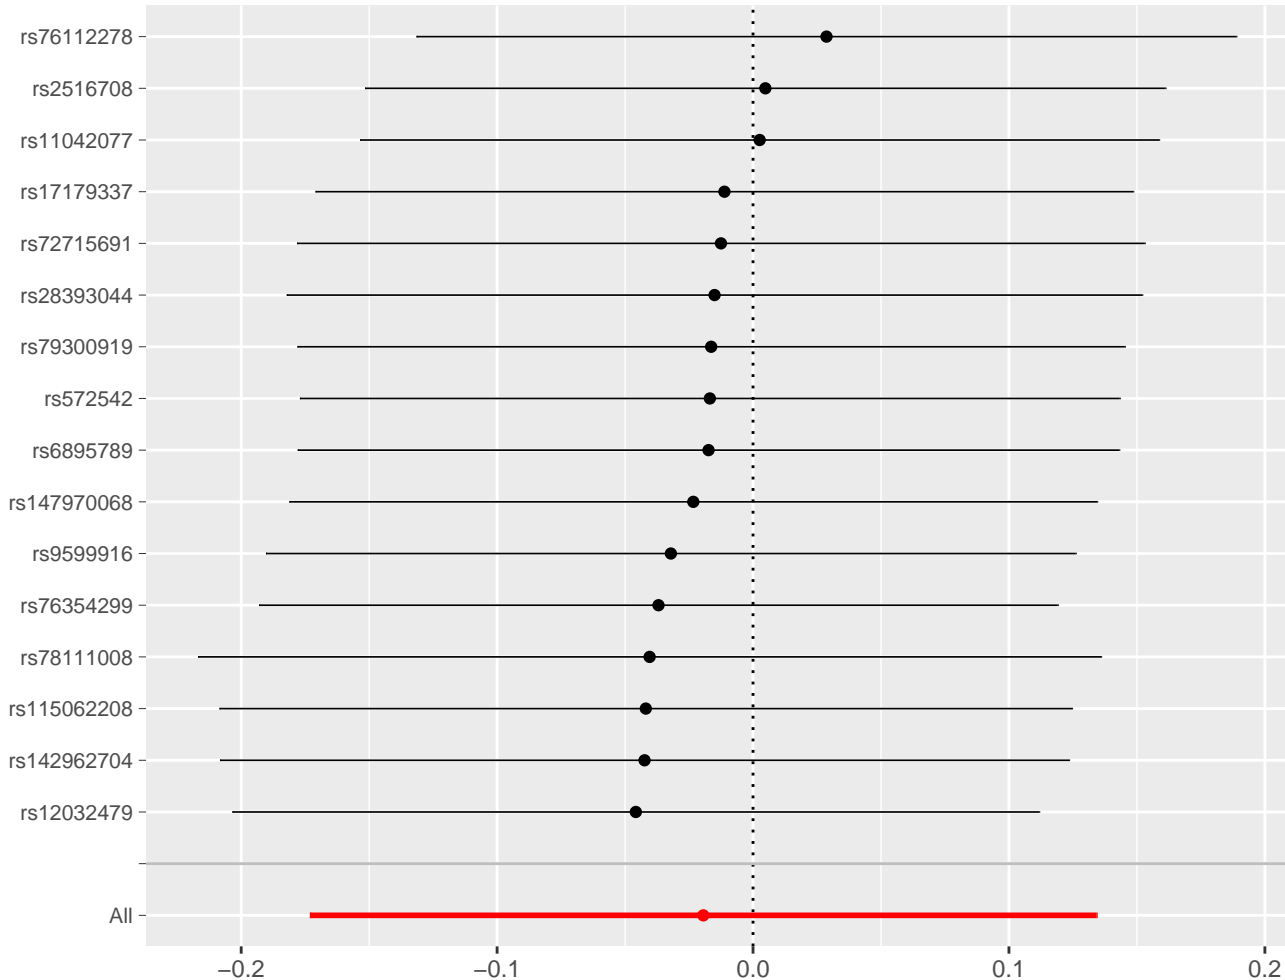

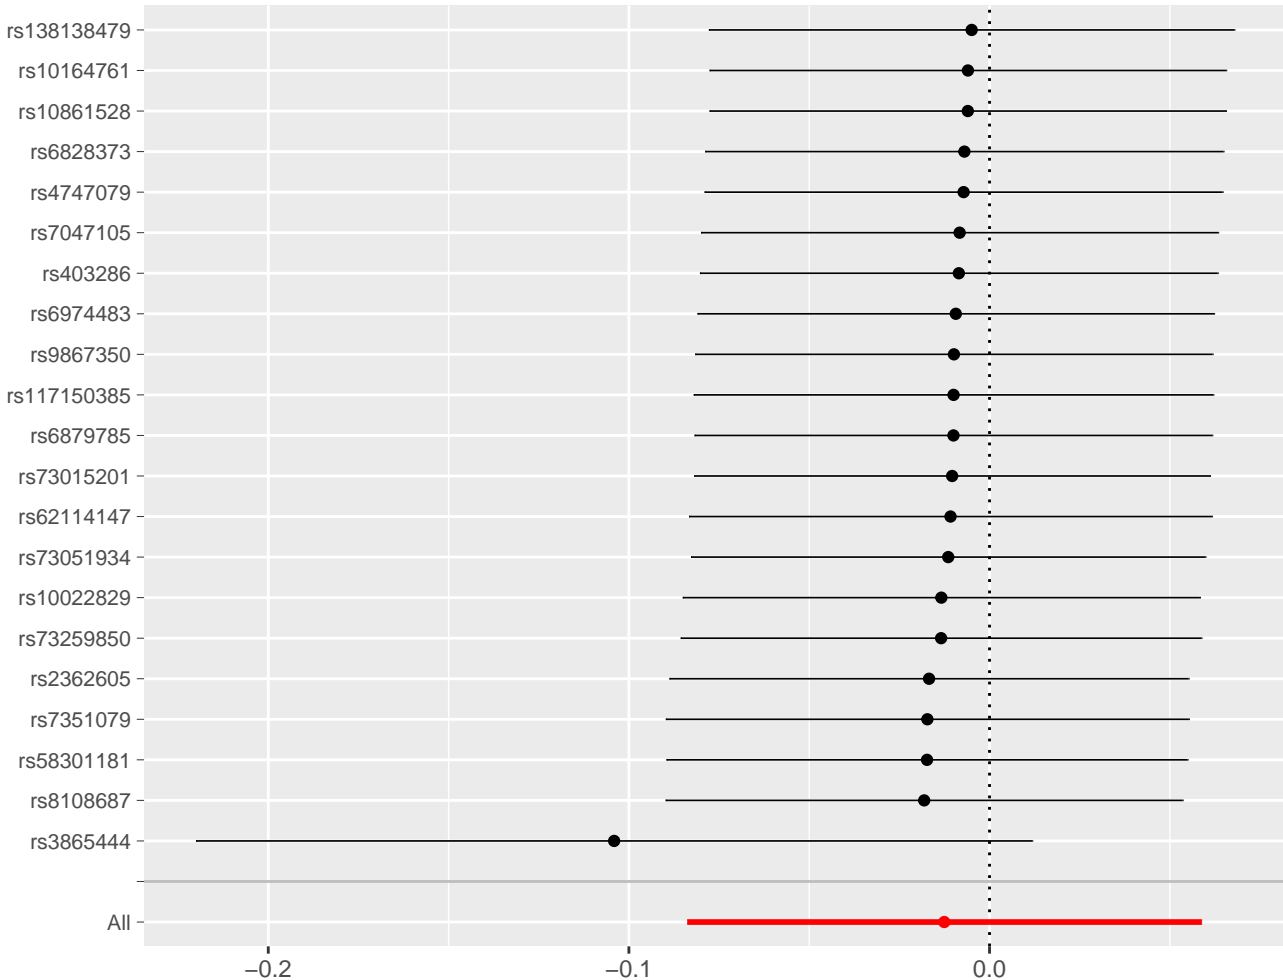

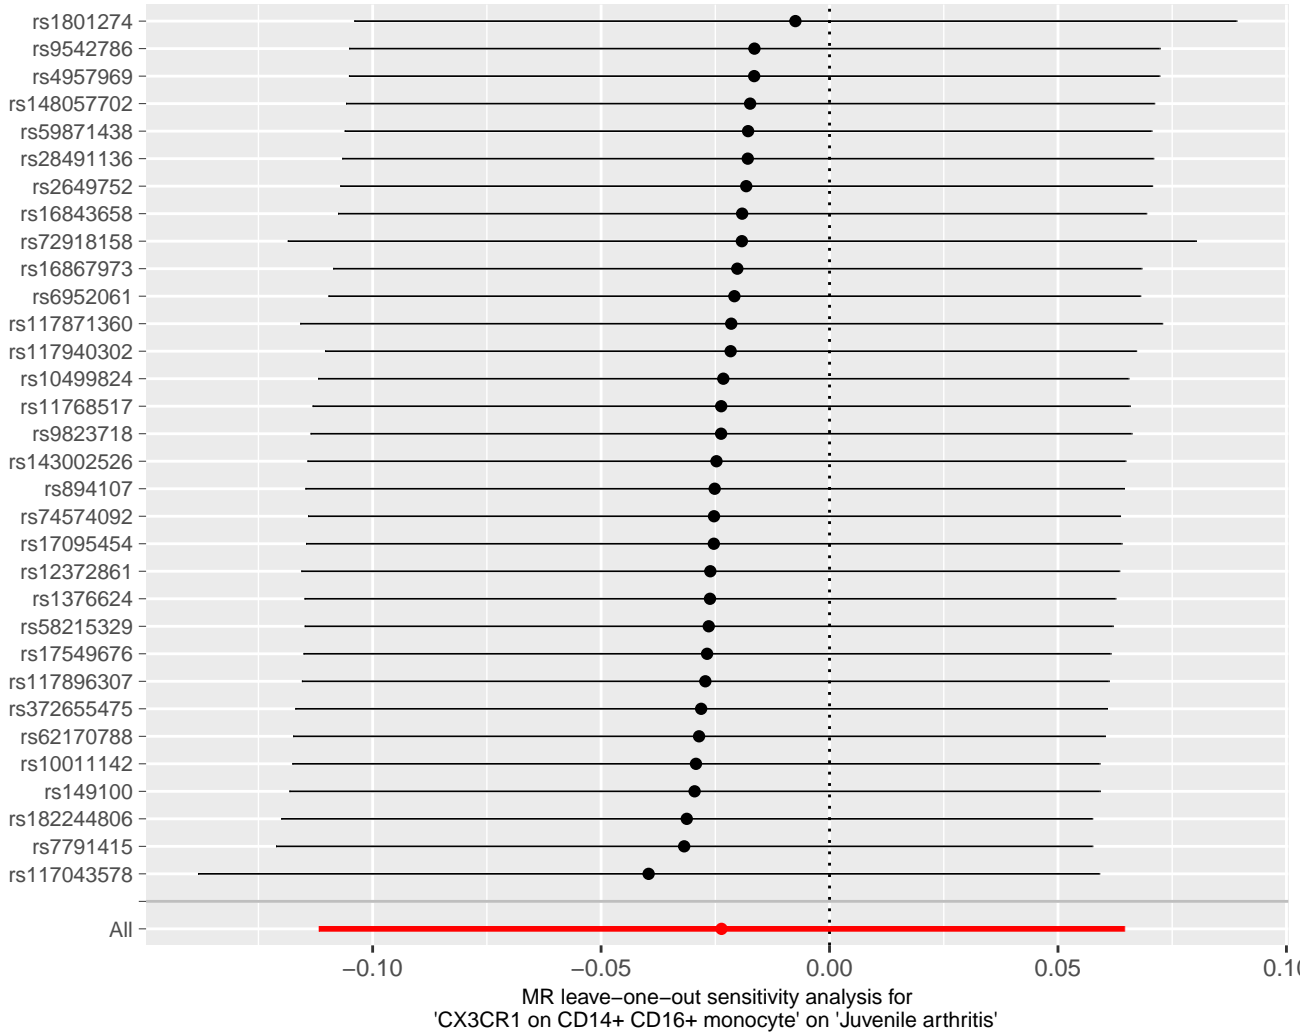

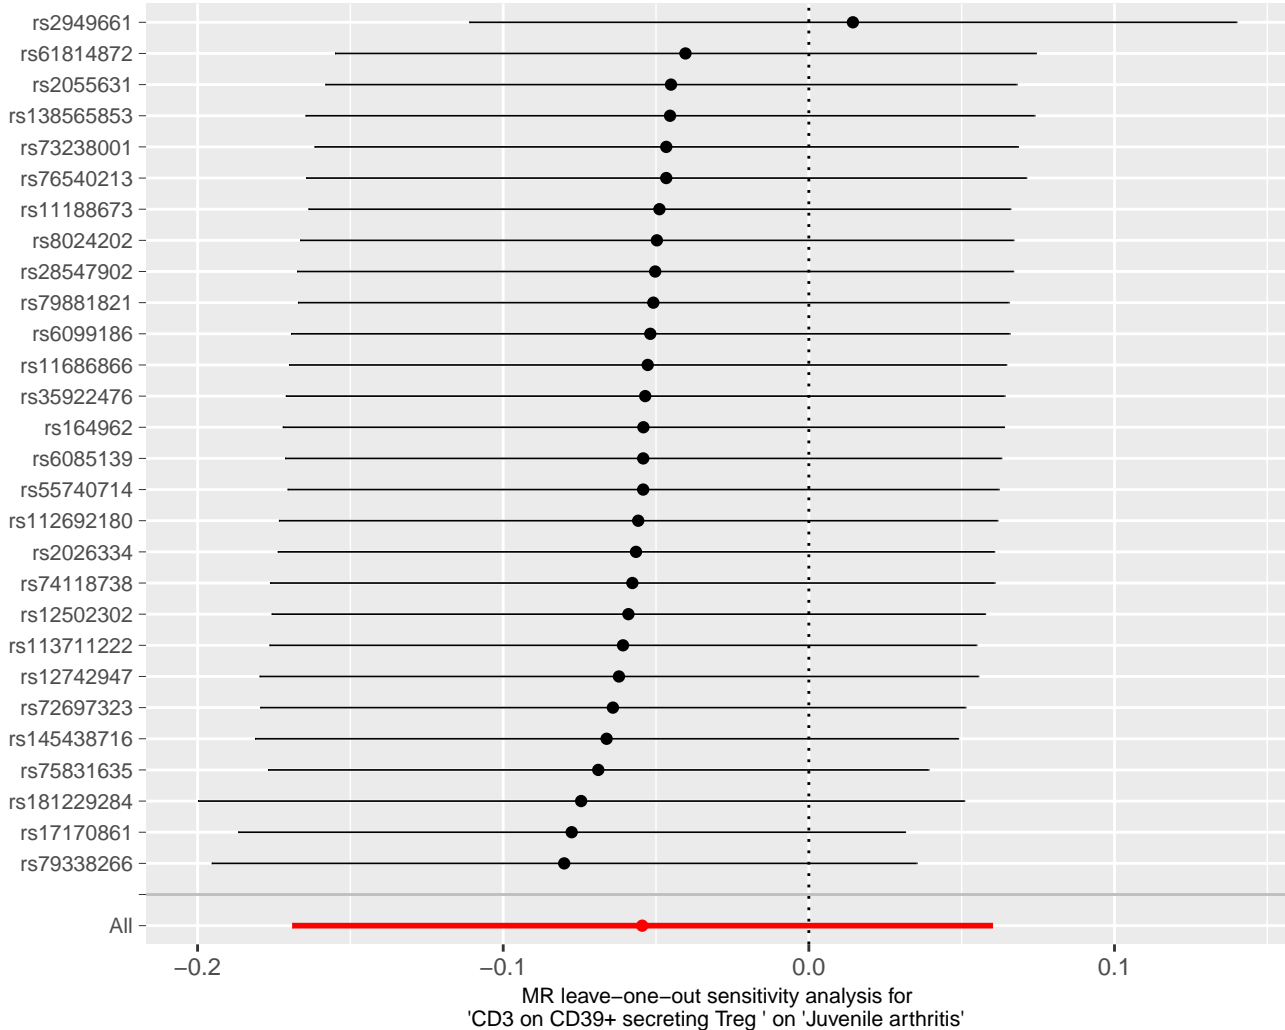

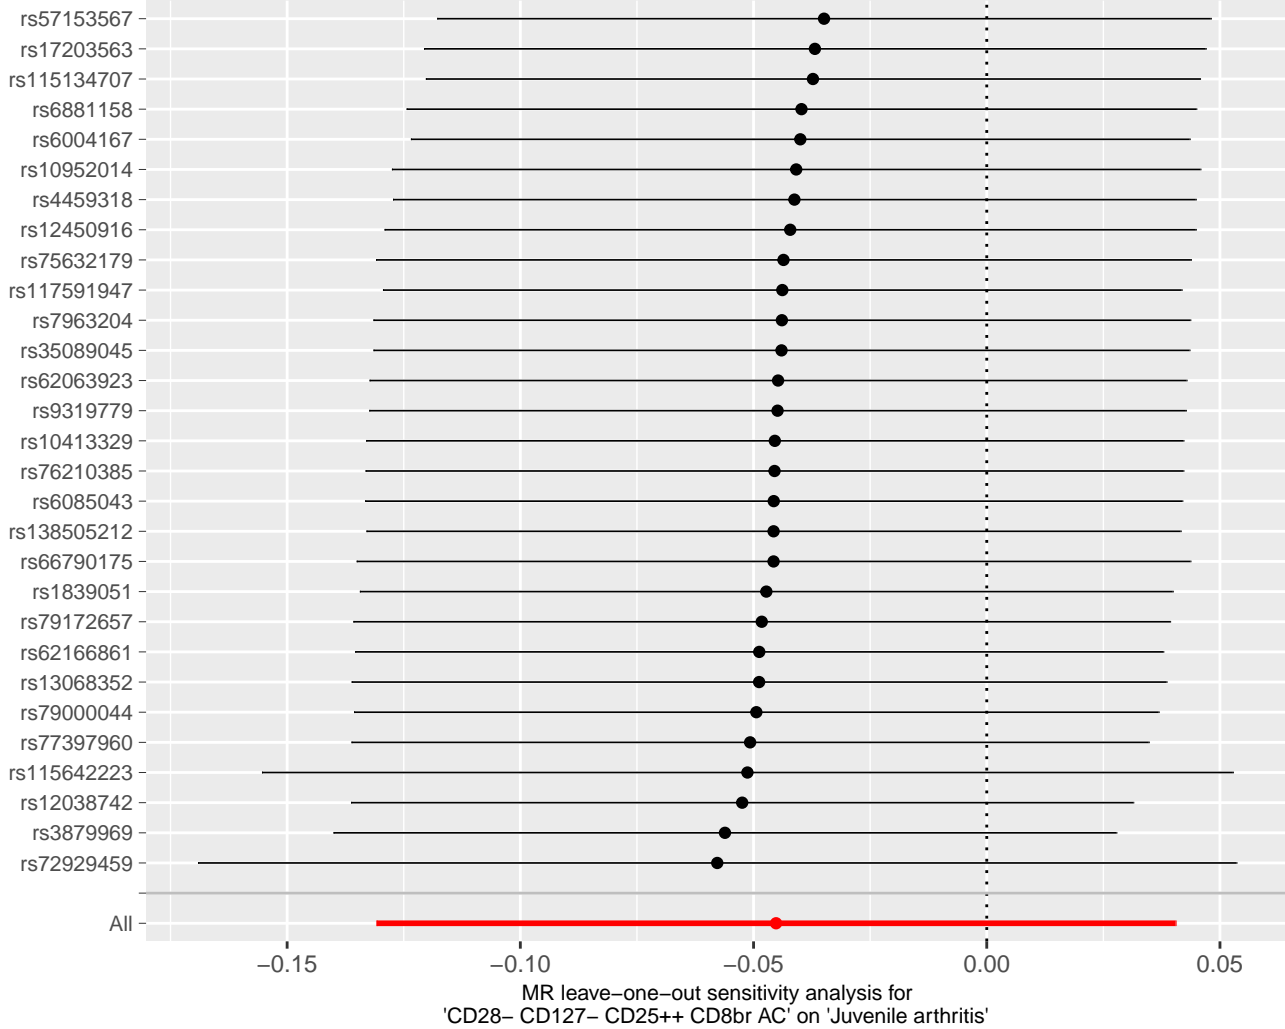



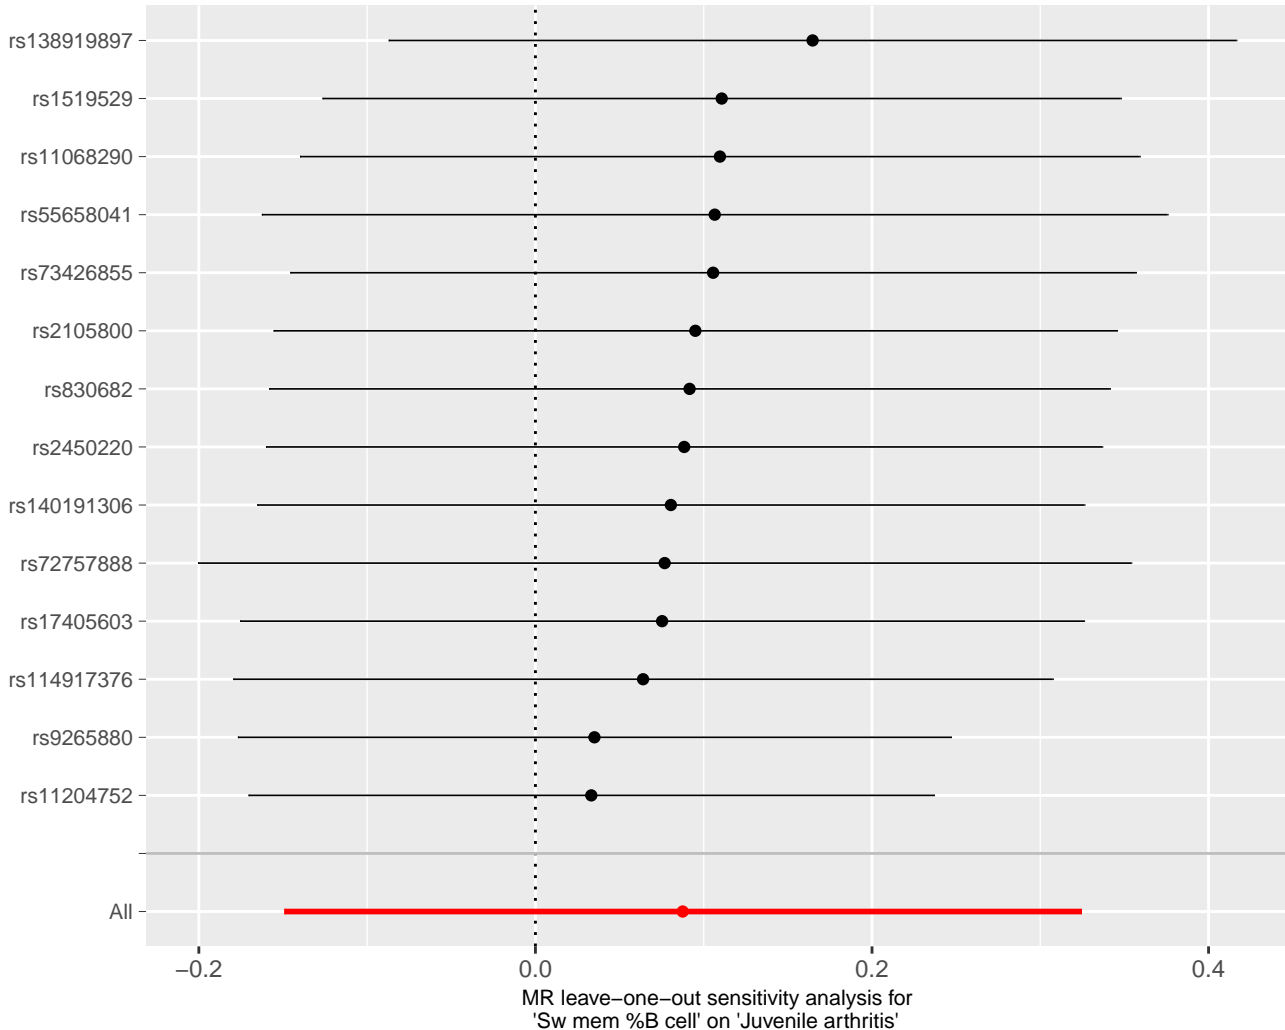

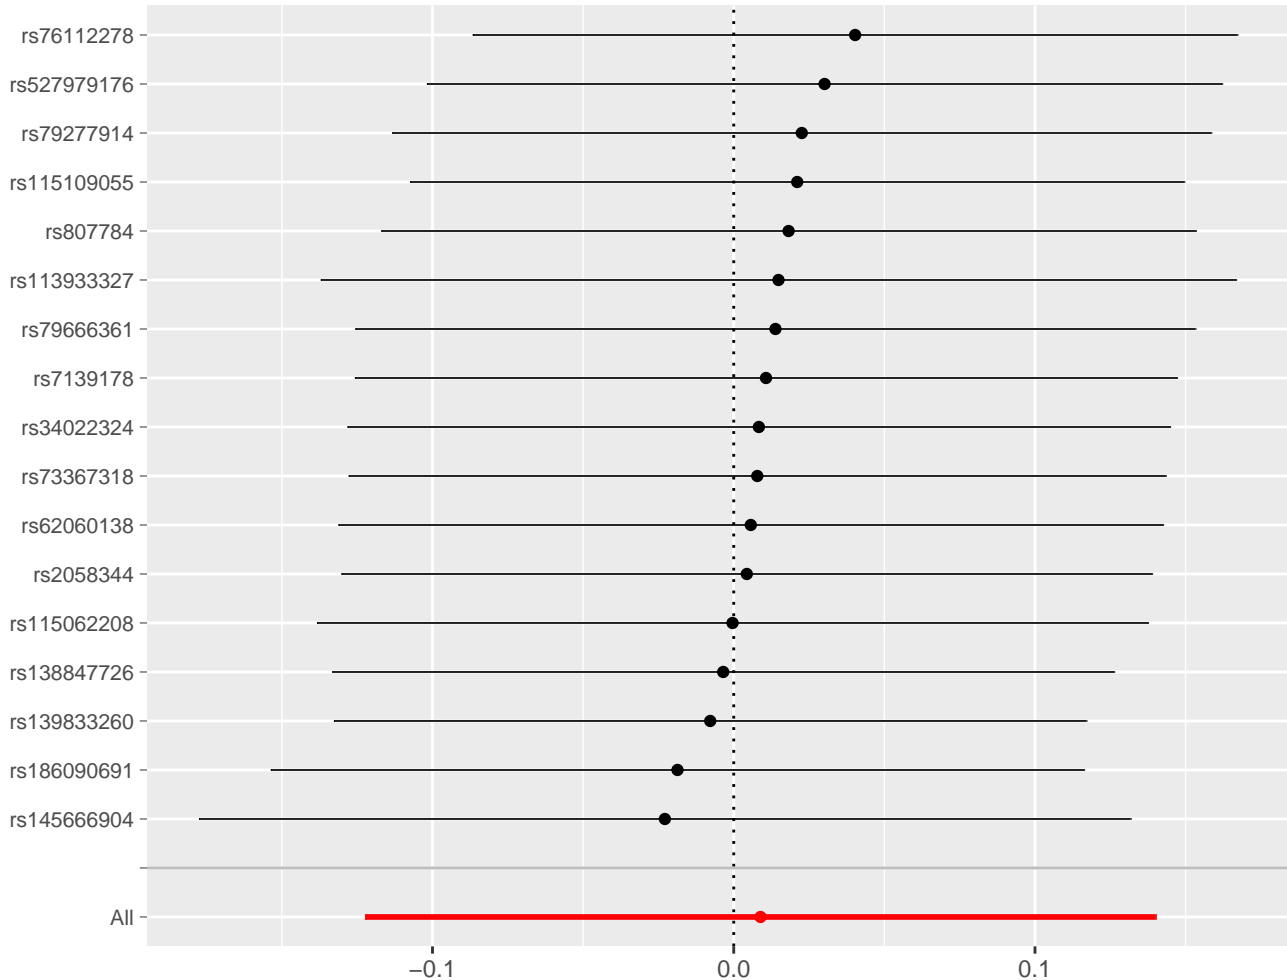

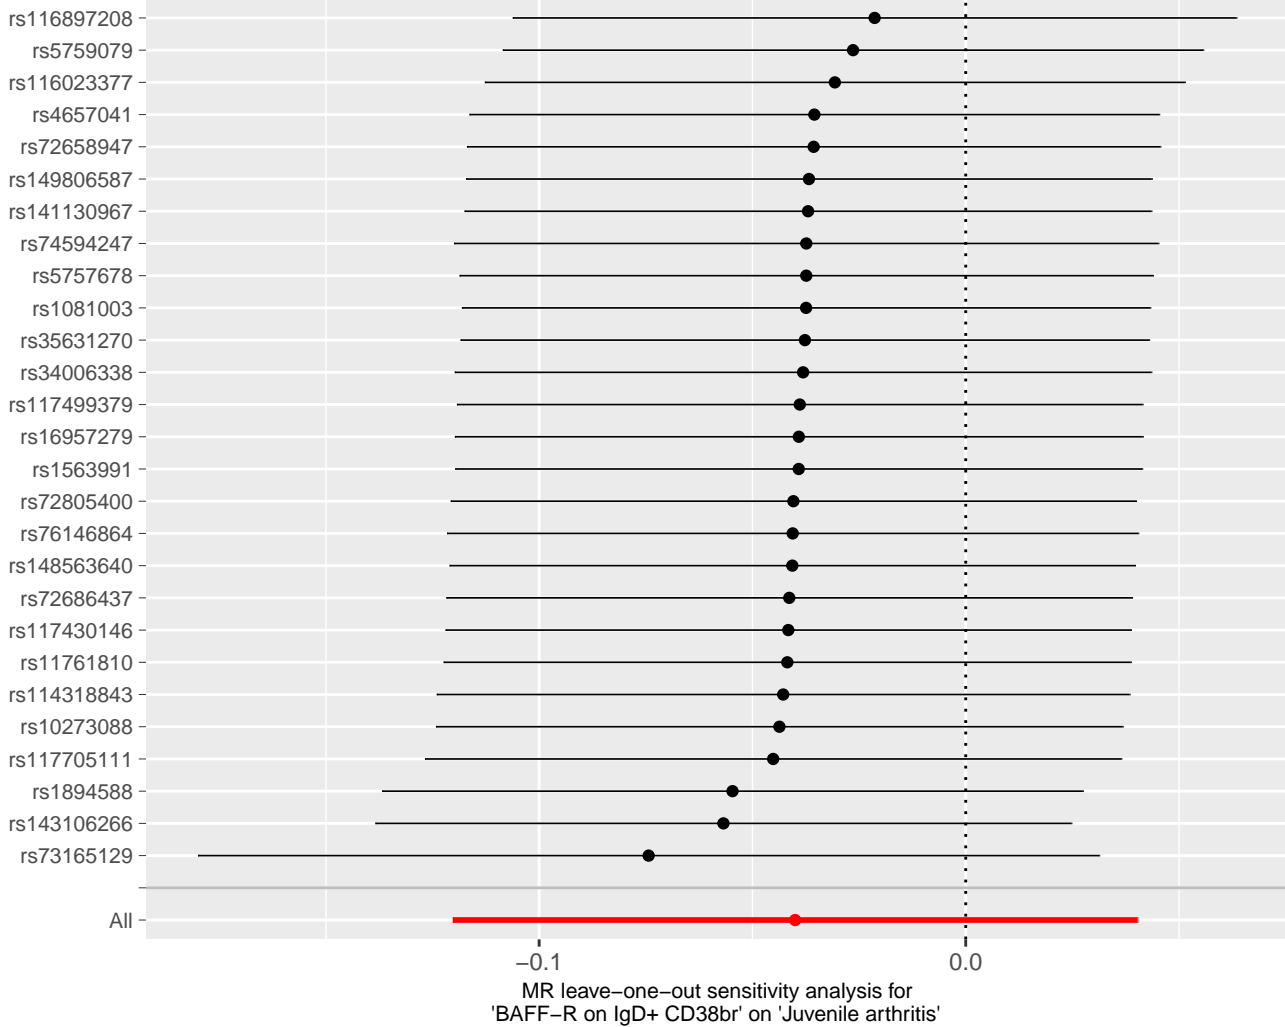

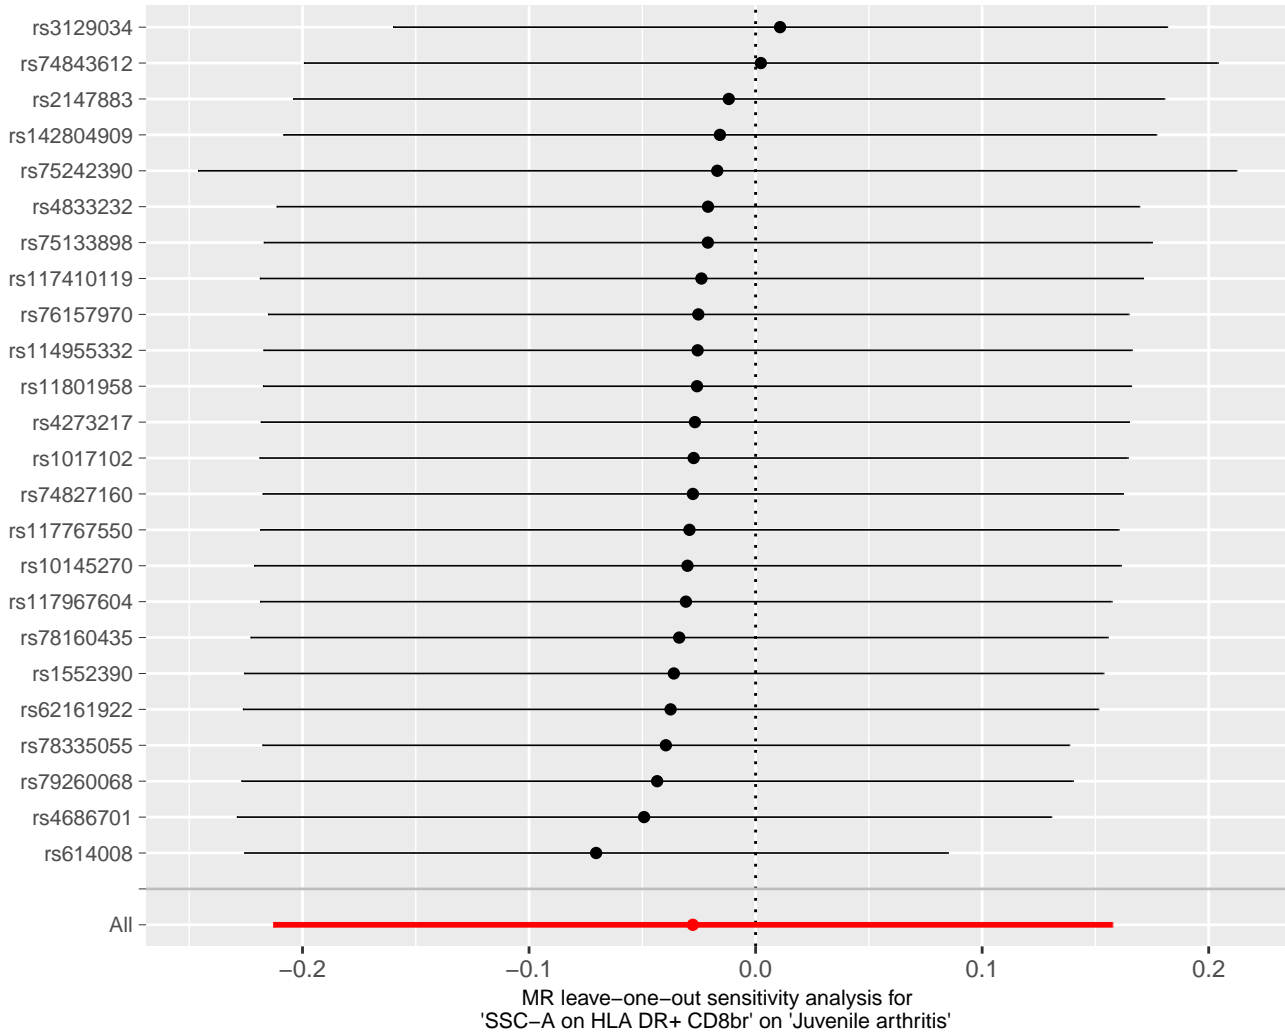

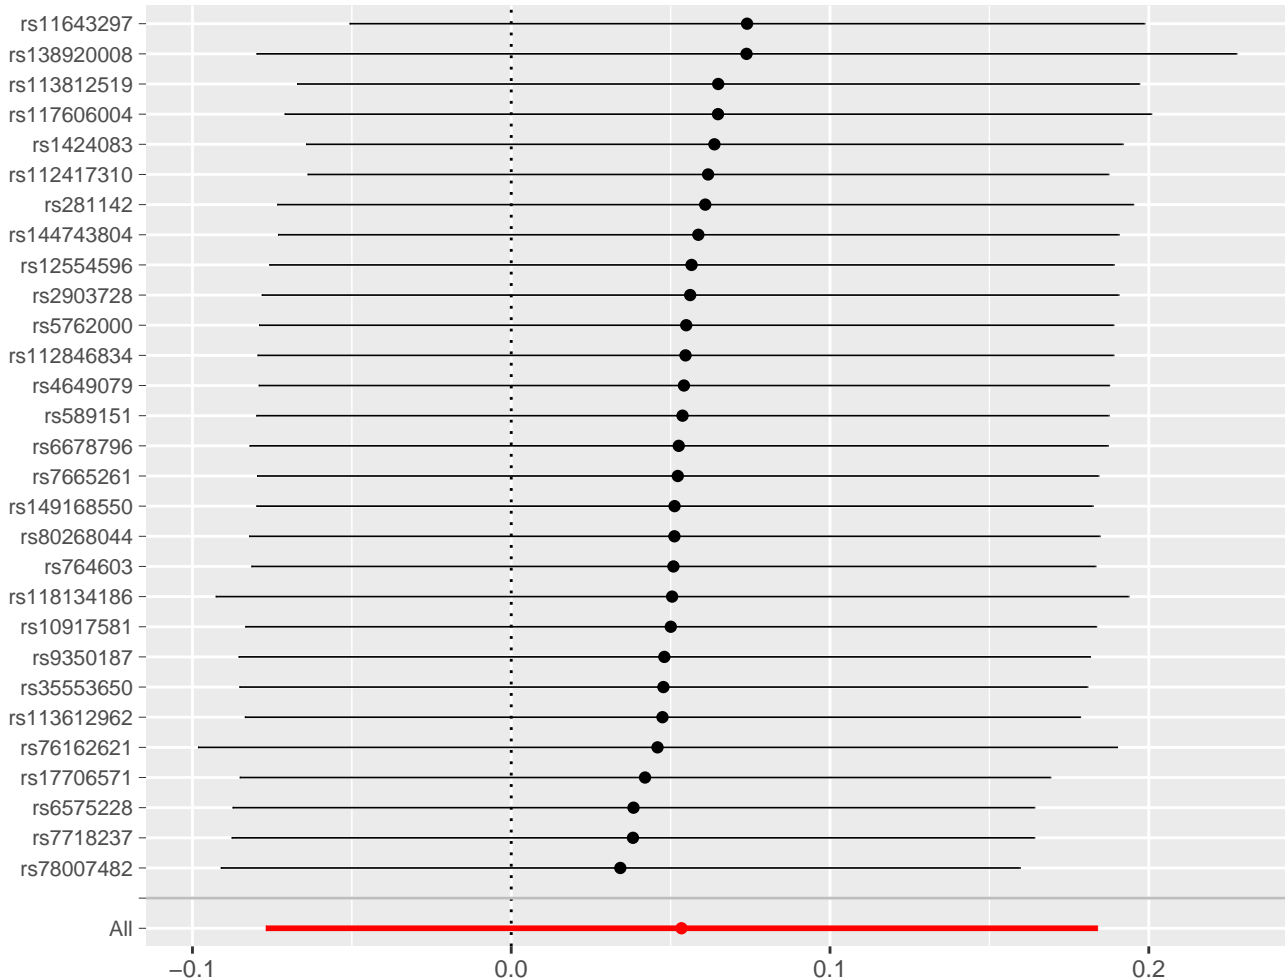

MR leave-one-out sensitivity analysis for 'CD19 on CD24+ CD27+' on 'Juvenile arthritis'

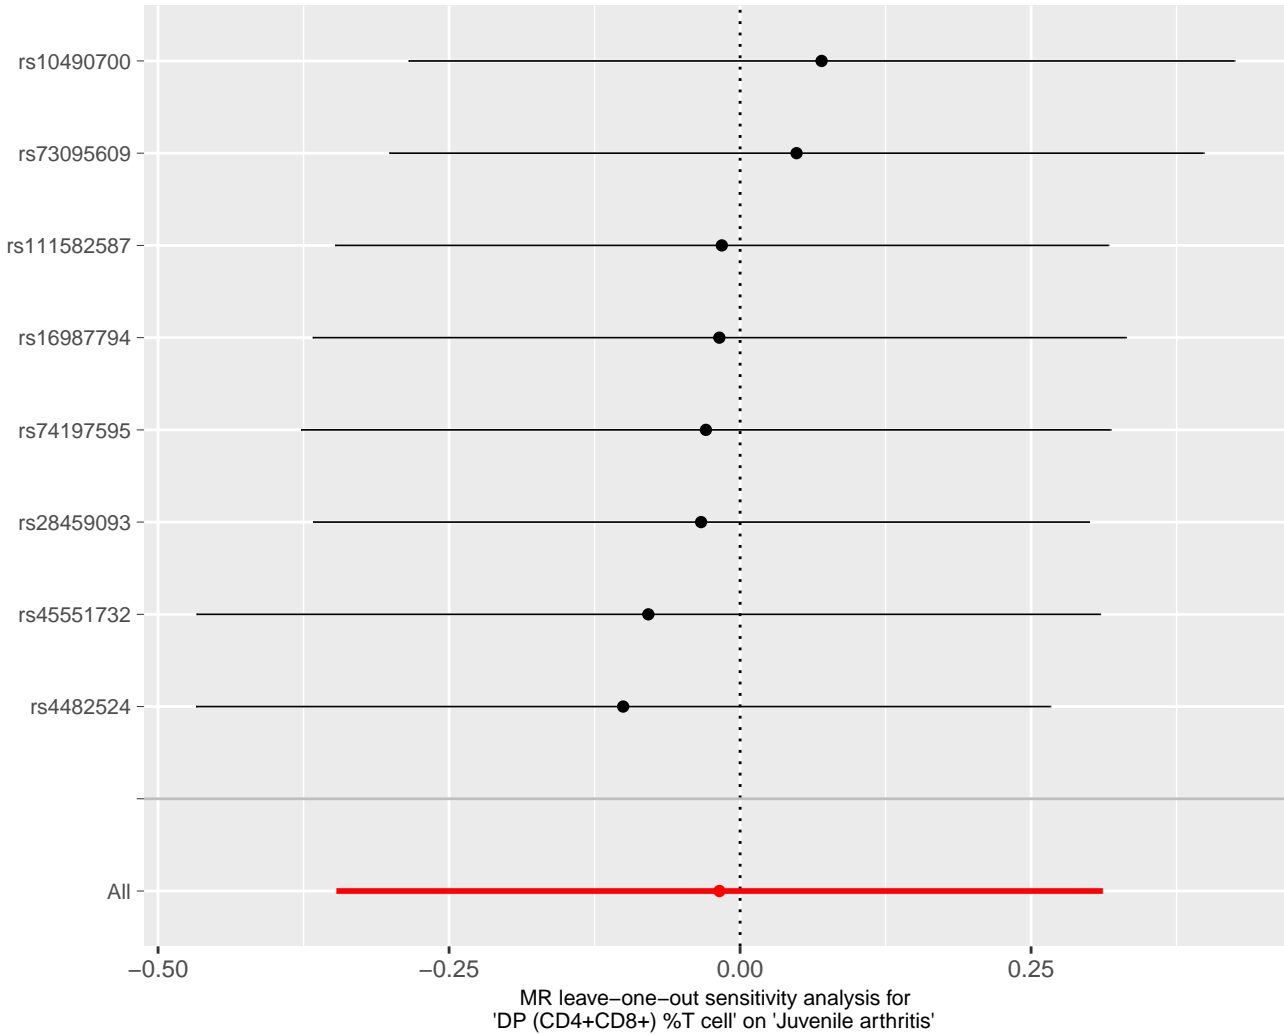

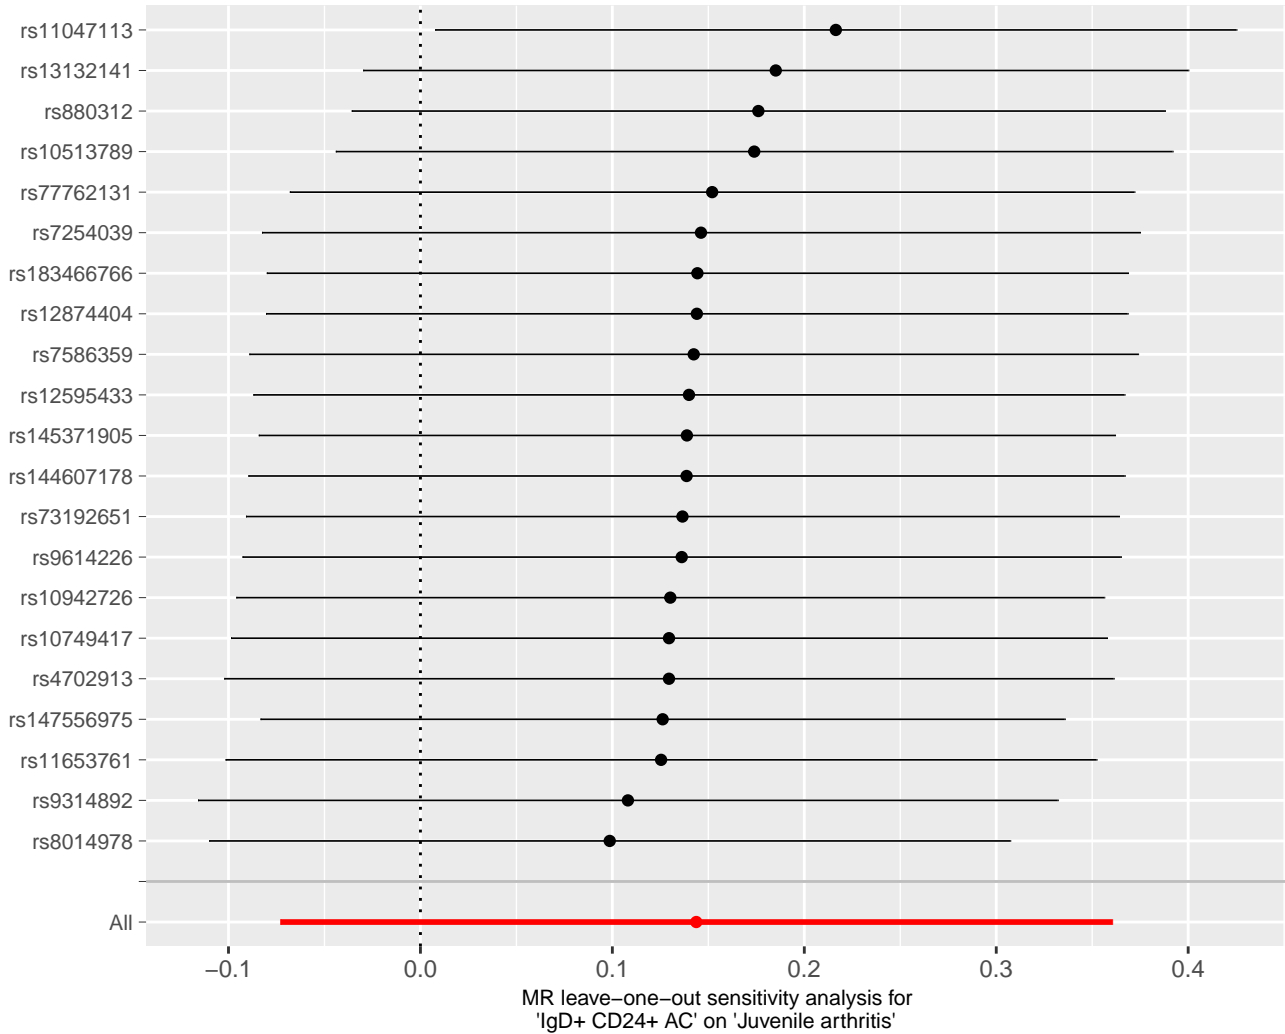

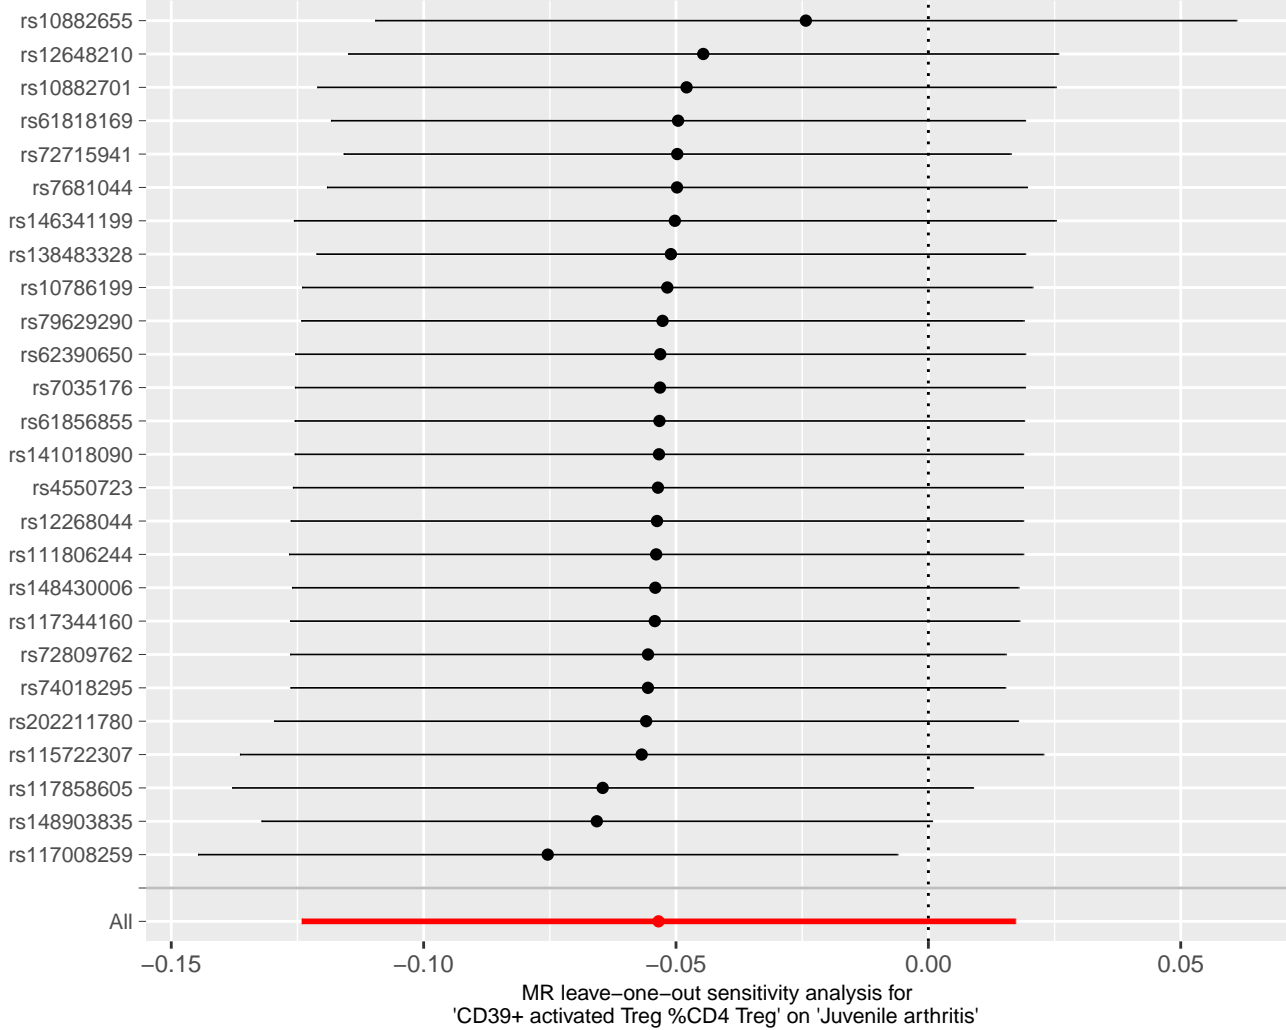



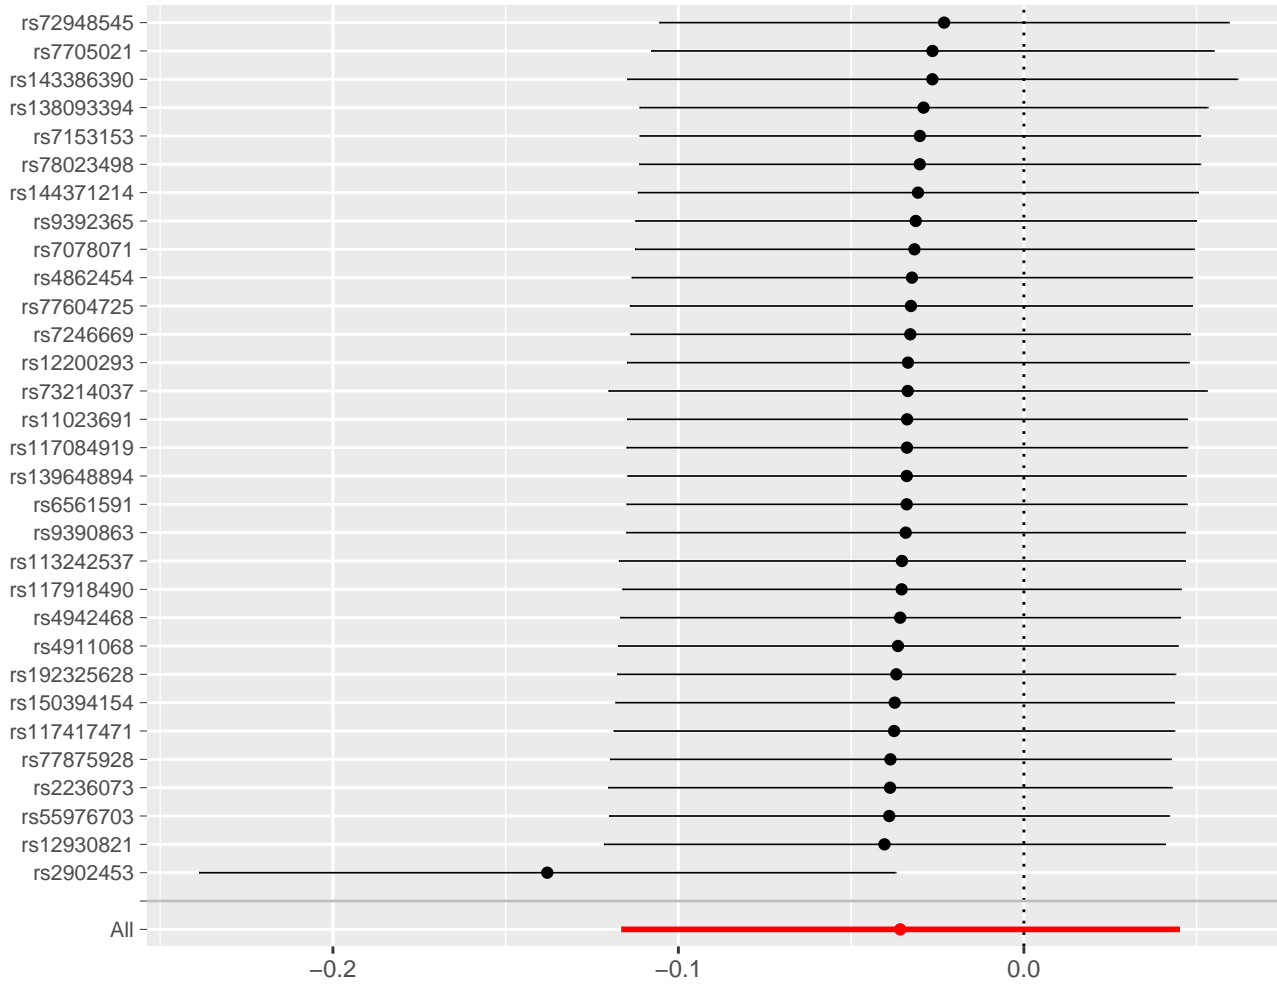

MR leave-one-out sensitivity analysis for 'CD24 on memory B cell' on 'Juvenile arthritis'

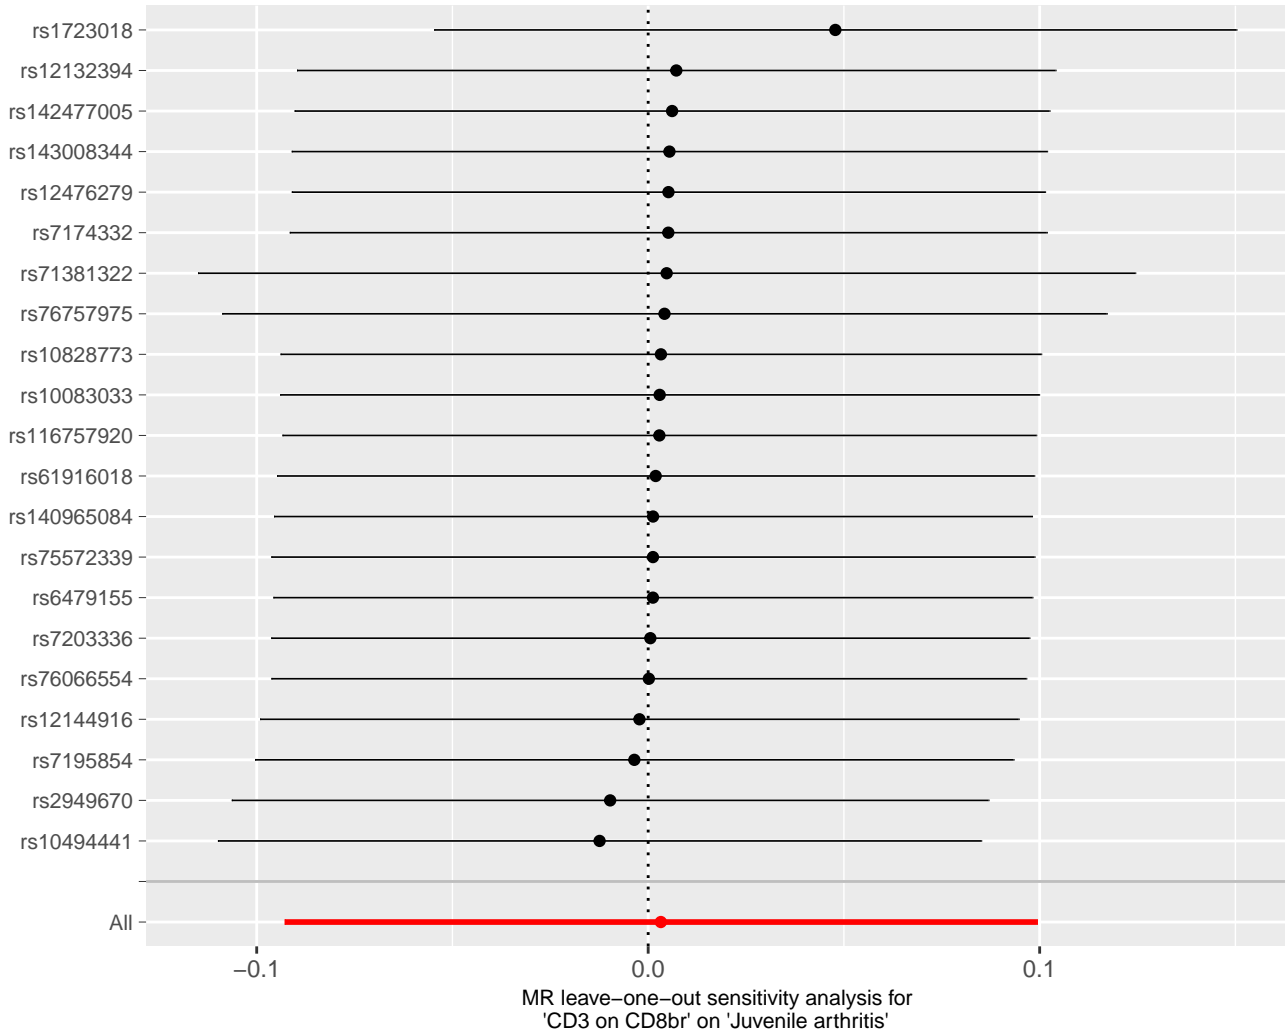

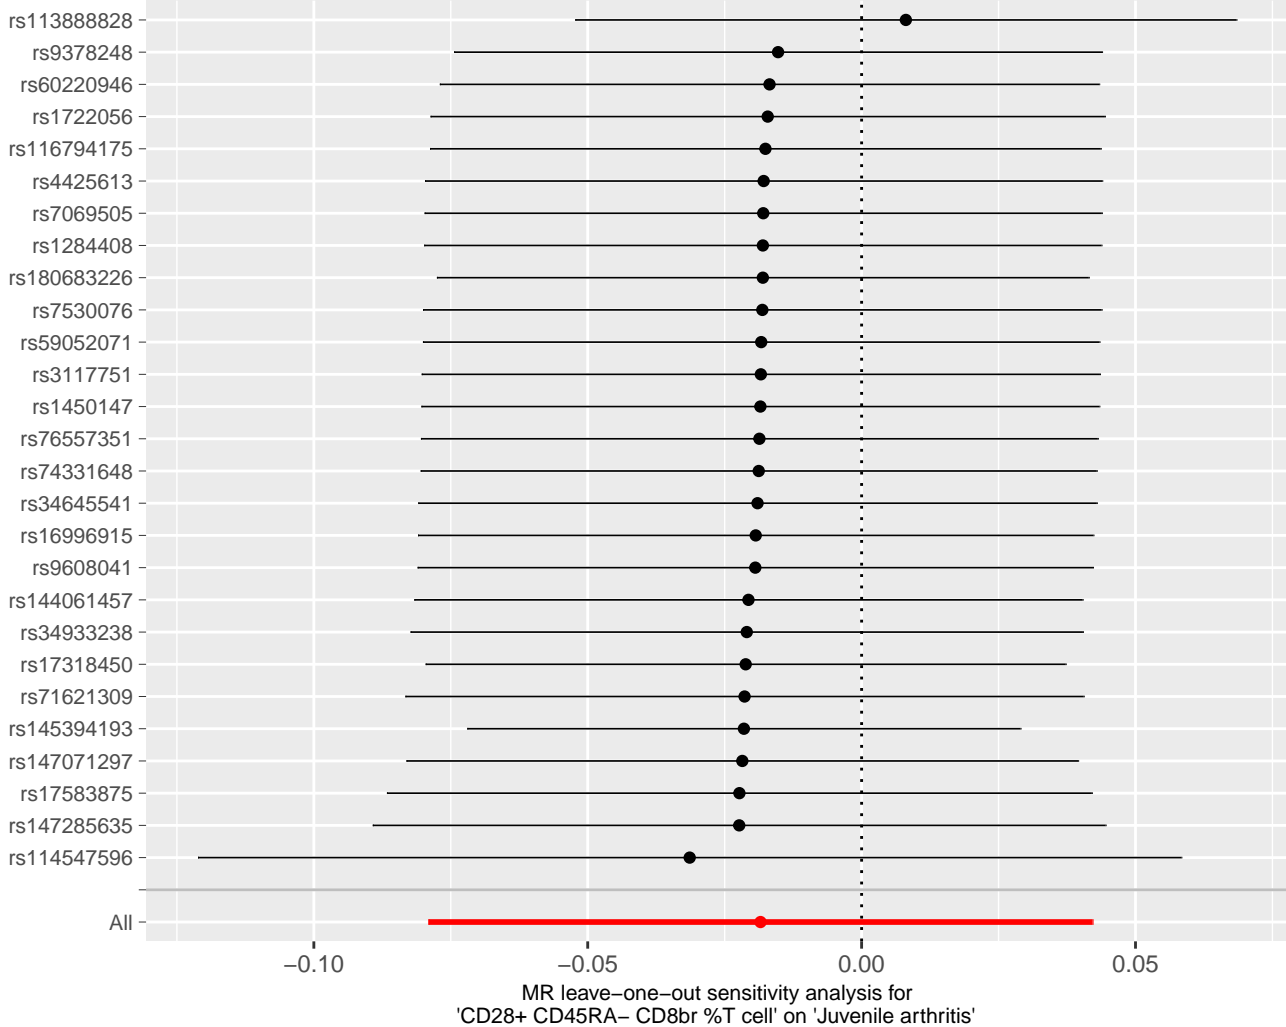

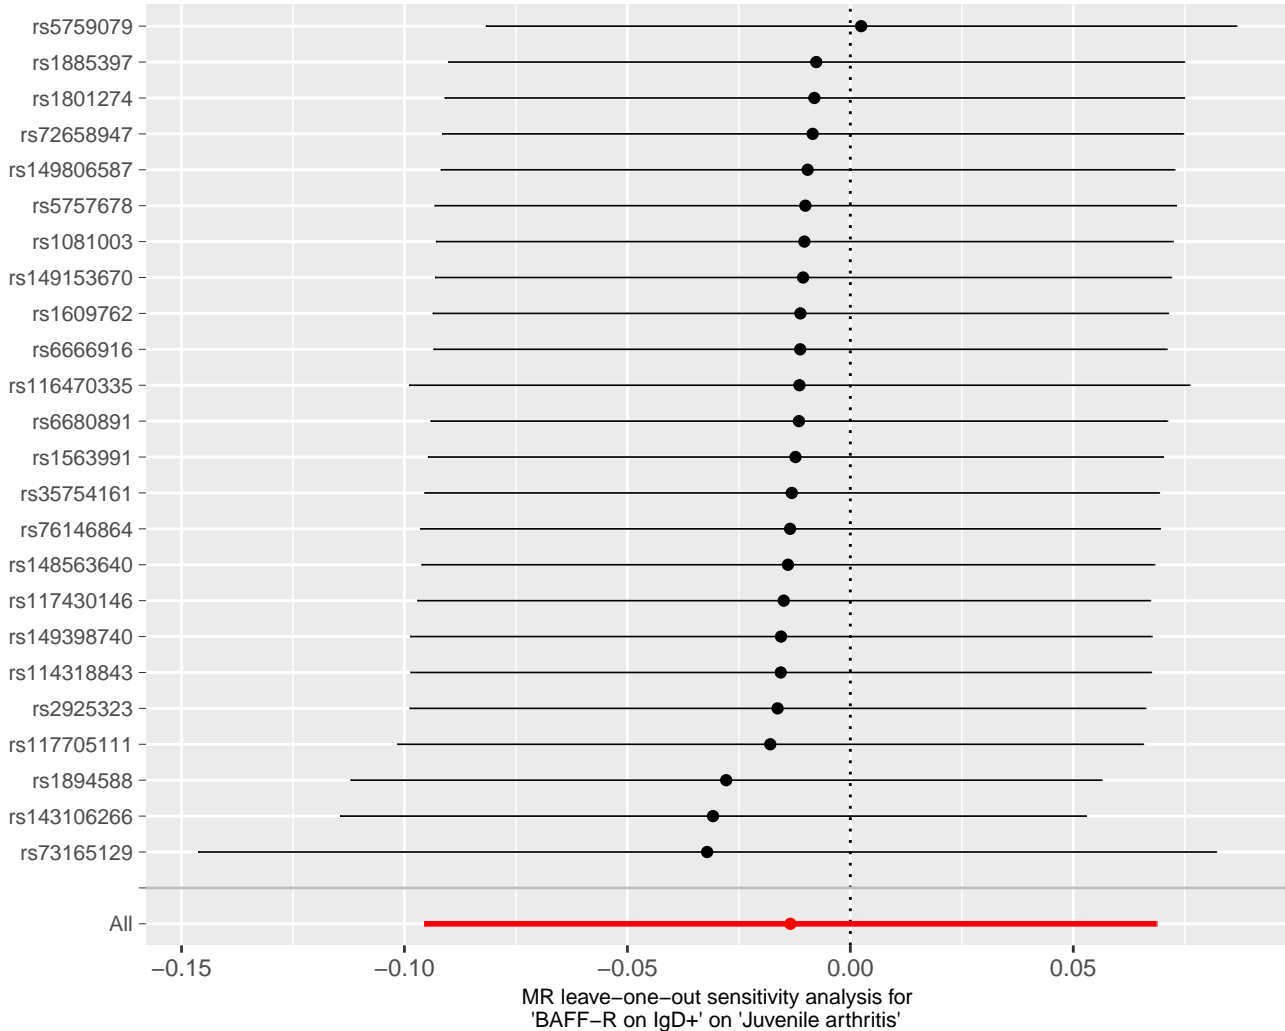

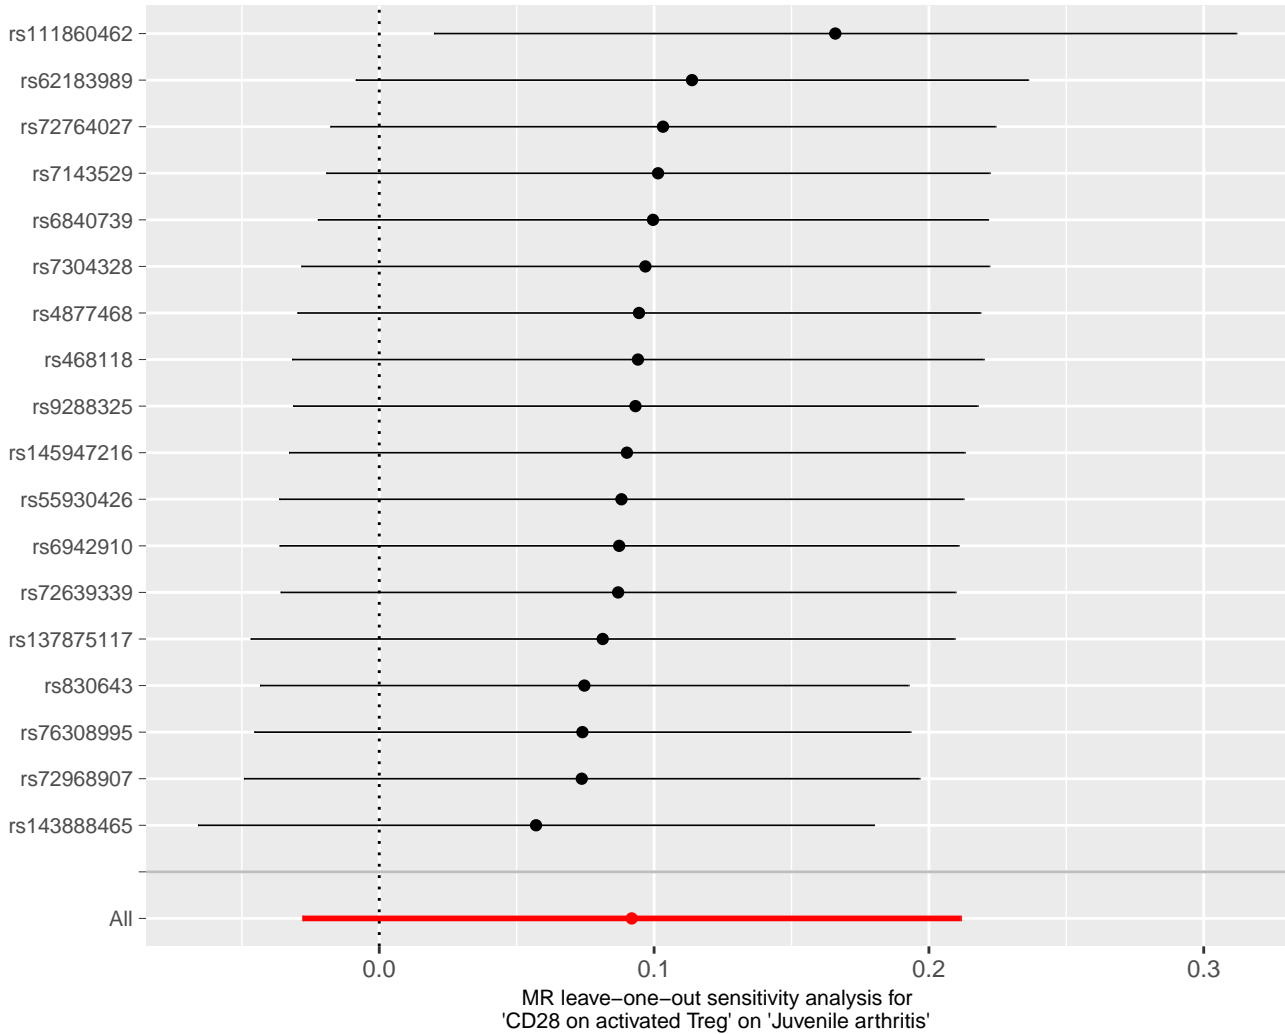

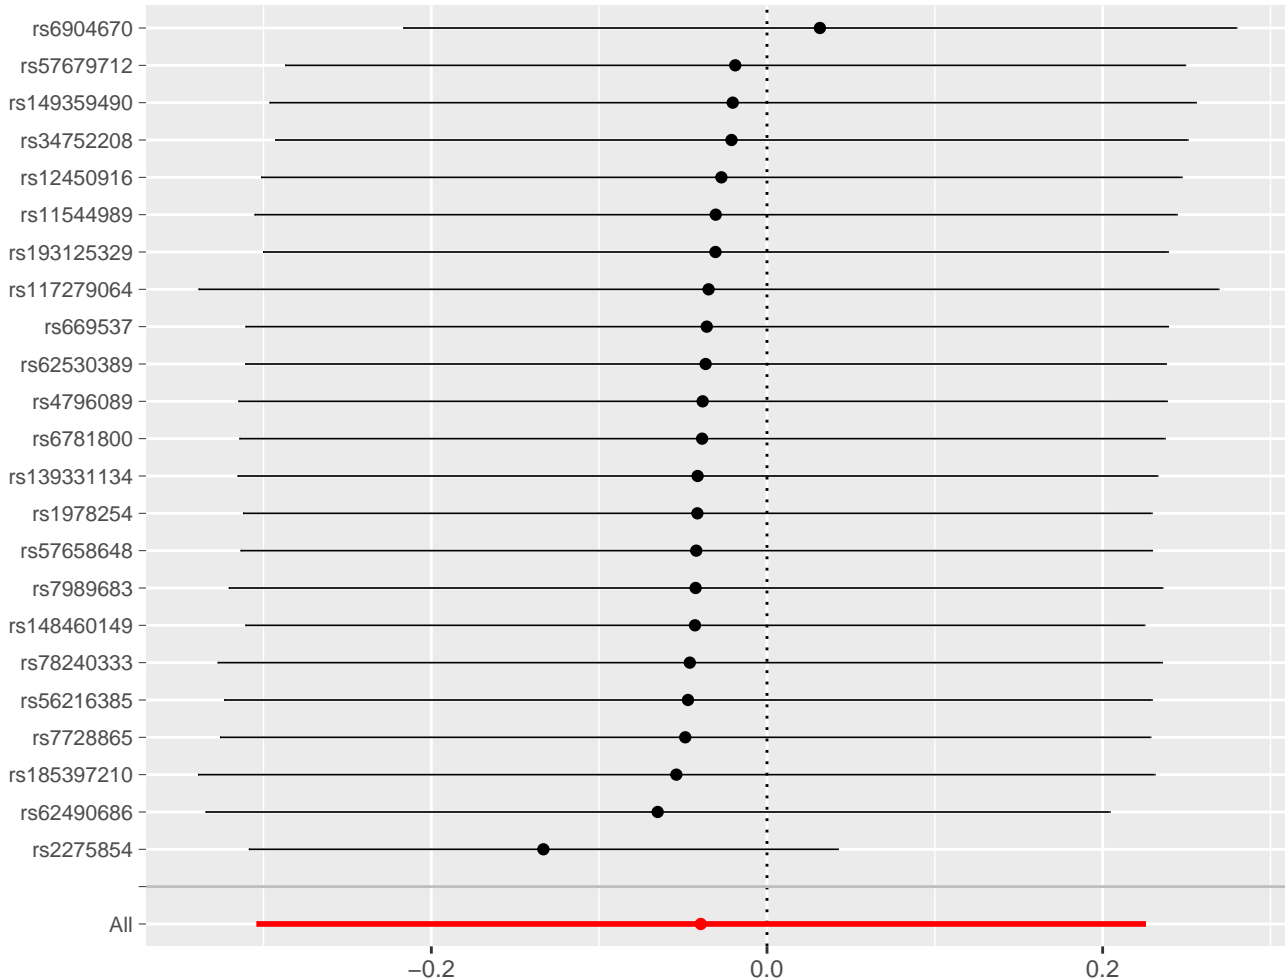

MR leave-one-out sensitivity analysis for 'CD28- CD8br %CD8br' on 'Juvenile arthritis'

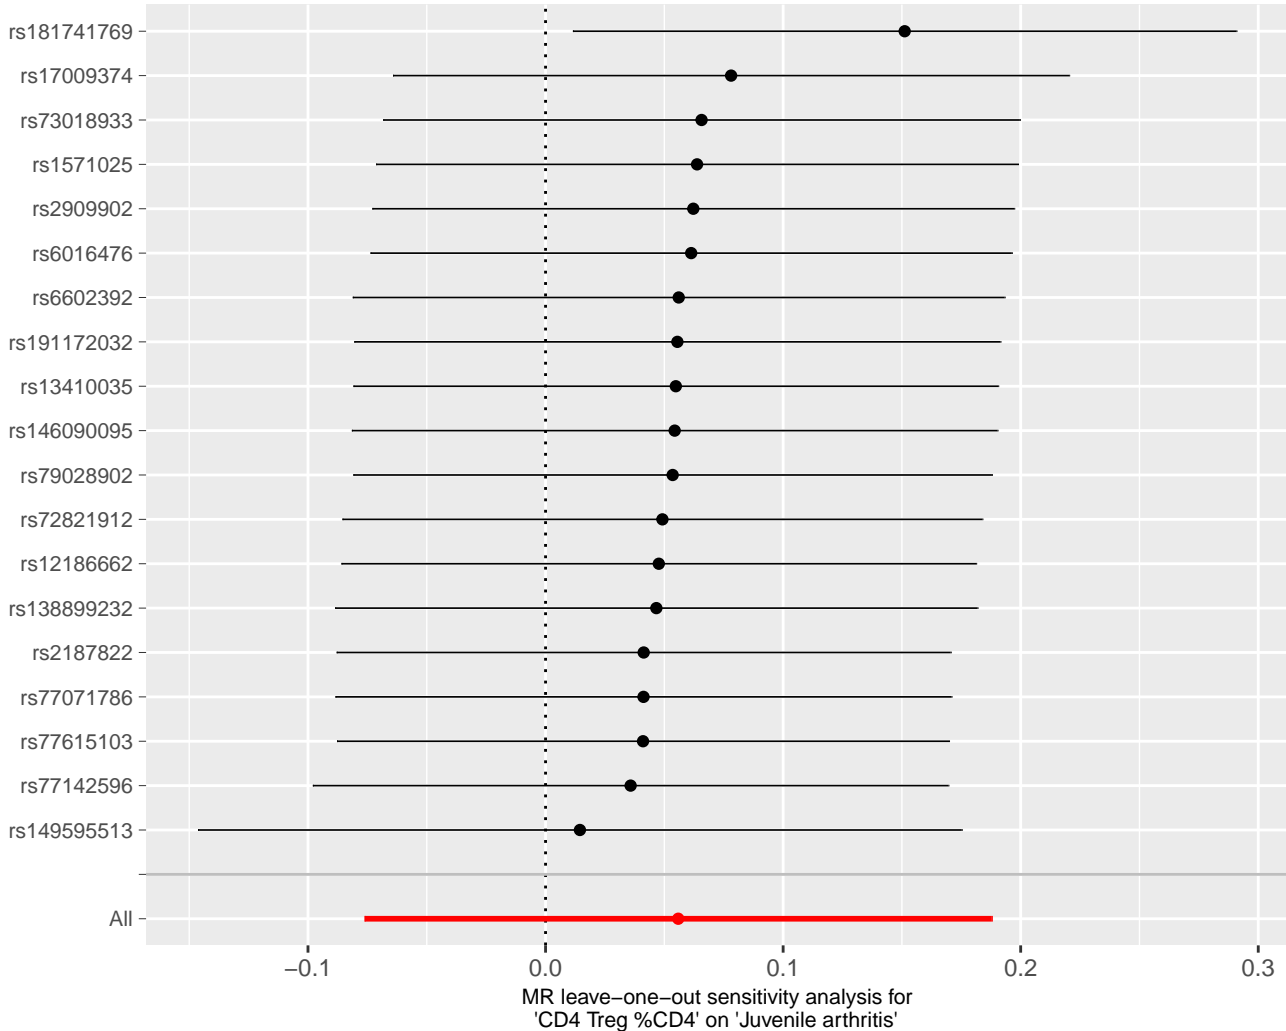

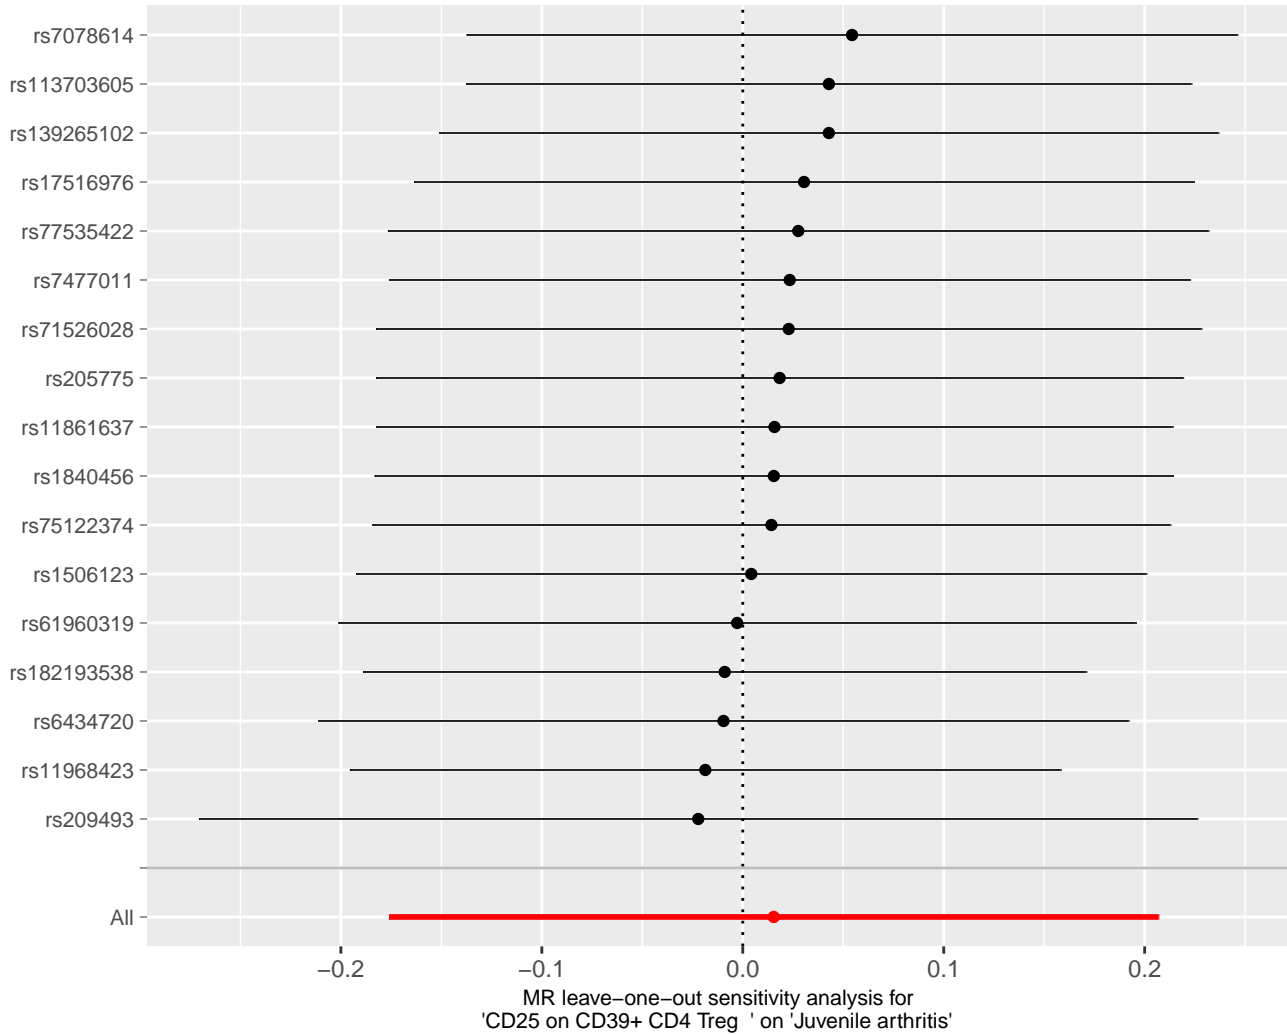



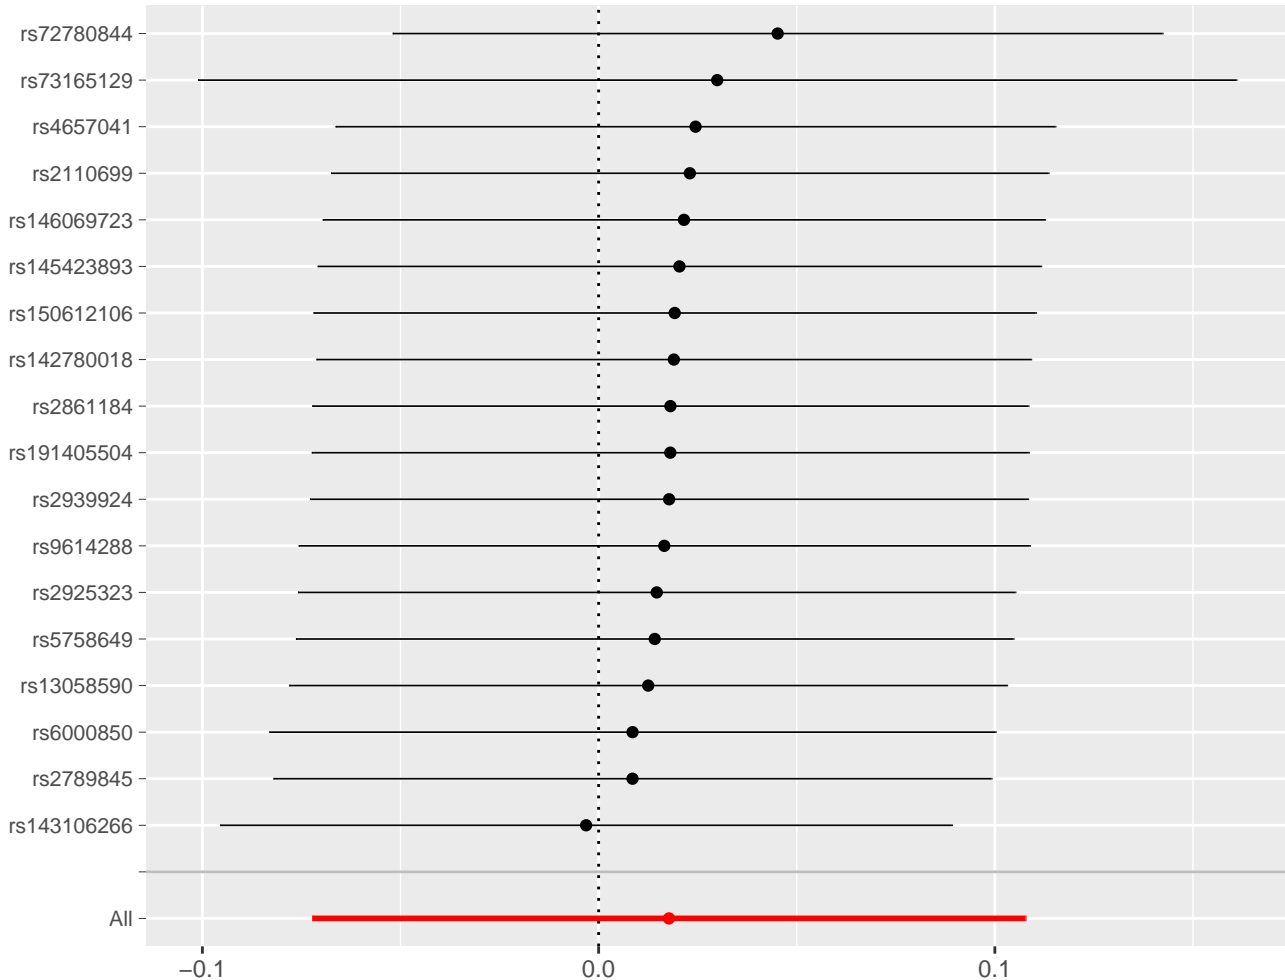

MR leave-one-out sensitivity analysis for 'BAFF-R on IgD- CD27-' on 'Juvenile arthritis'

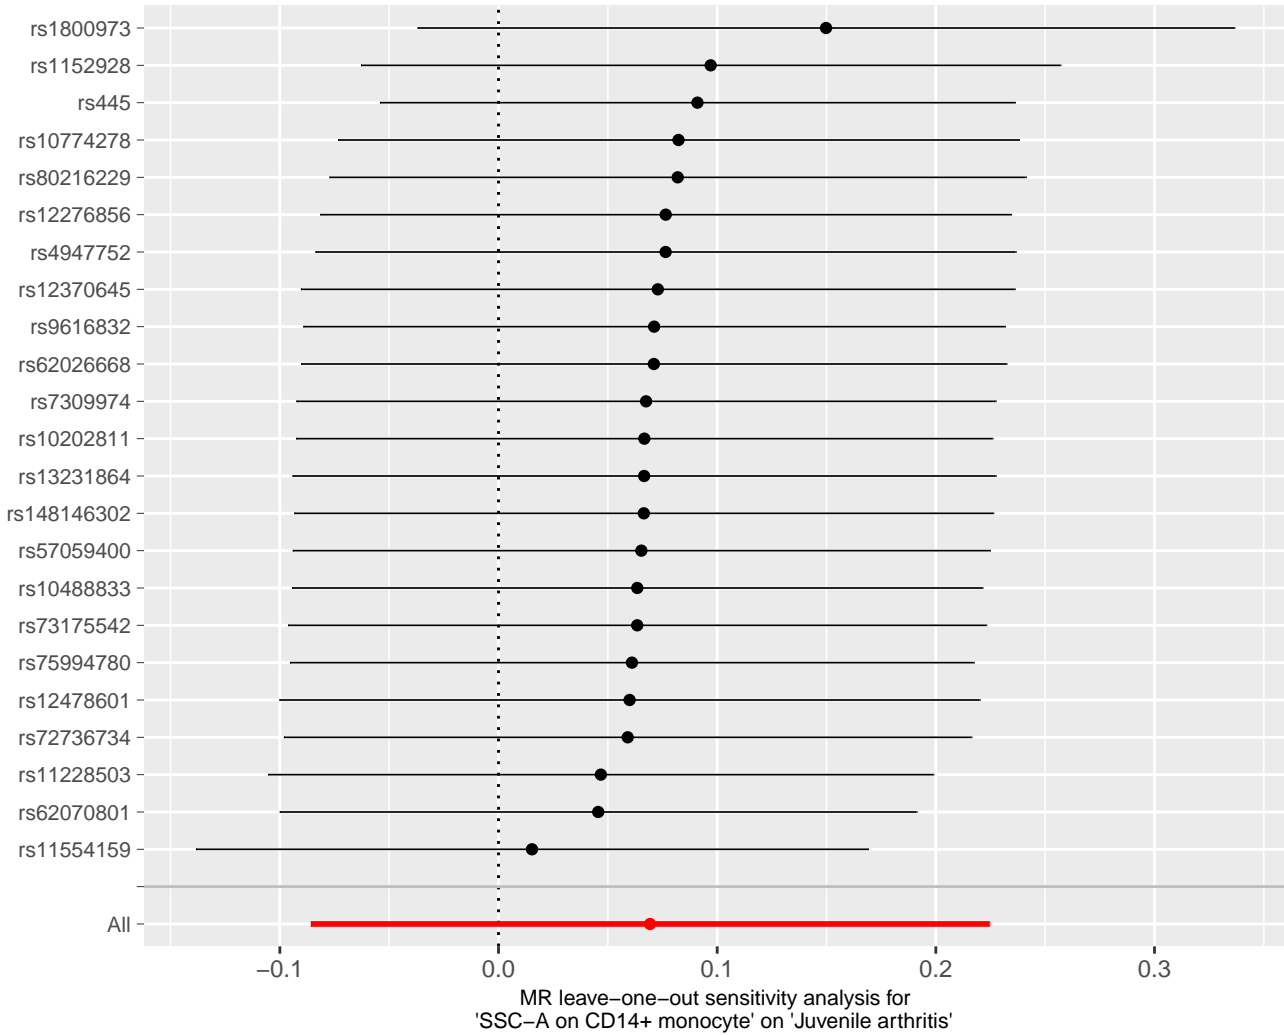

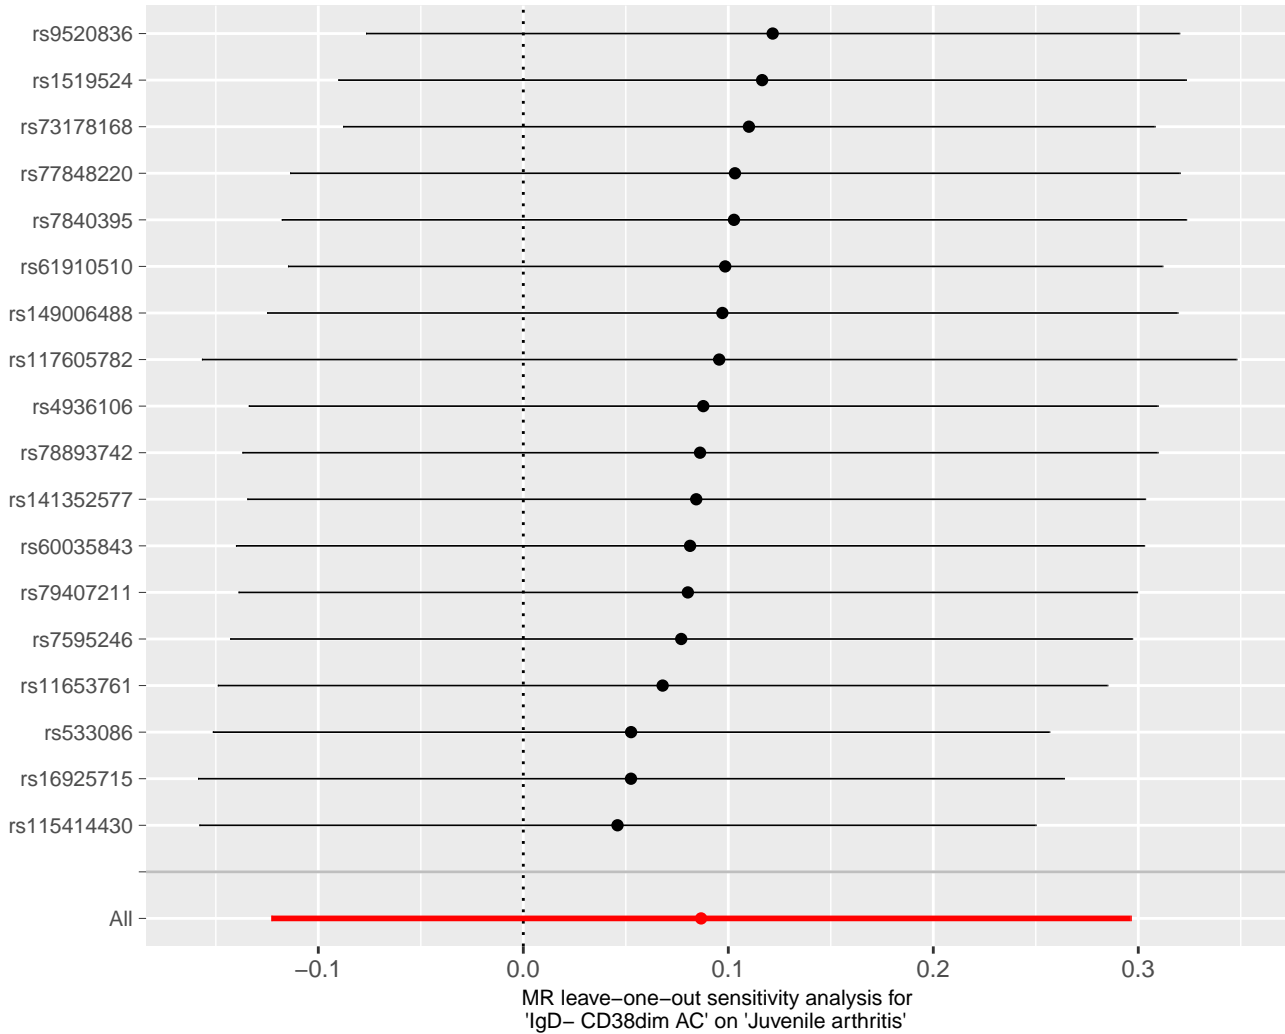

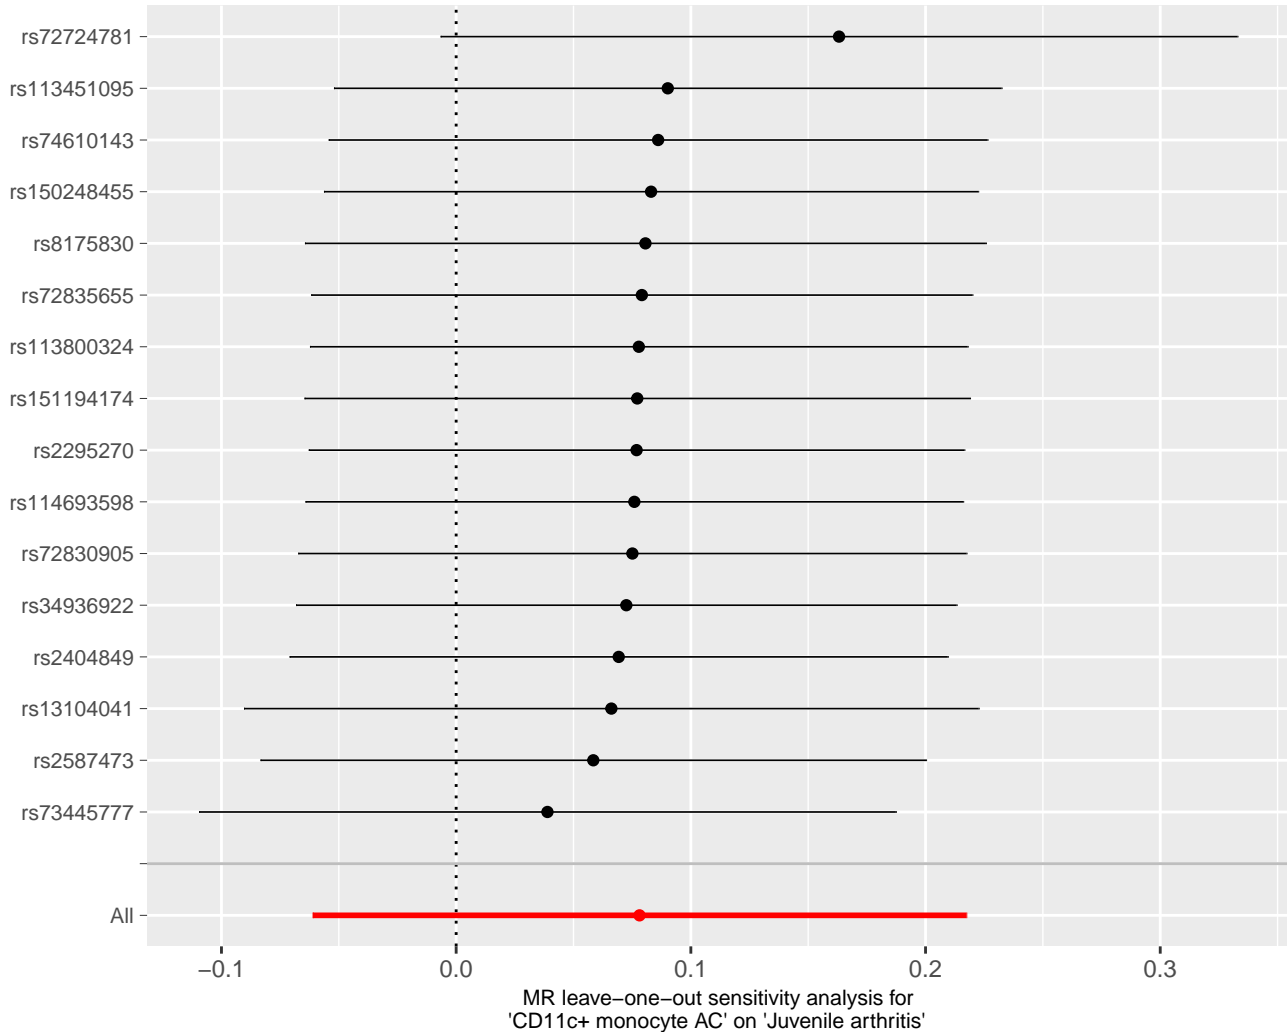

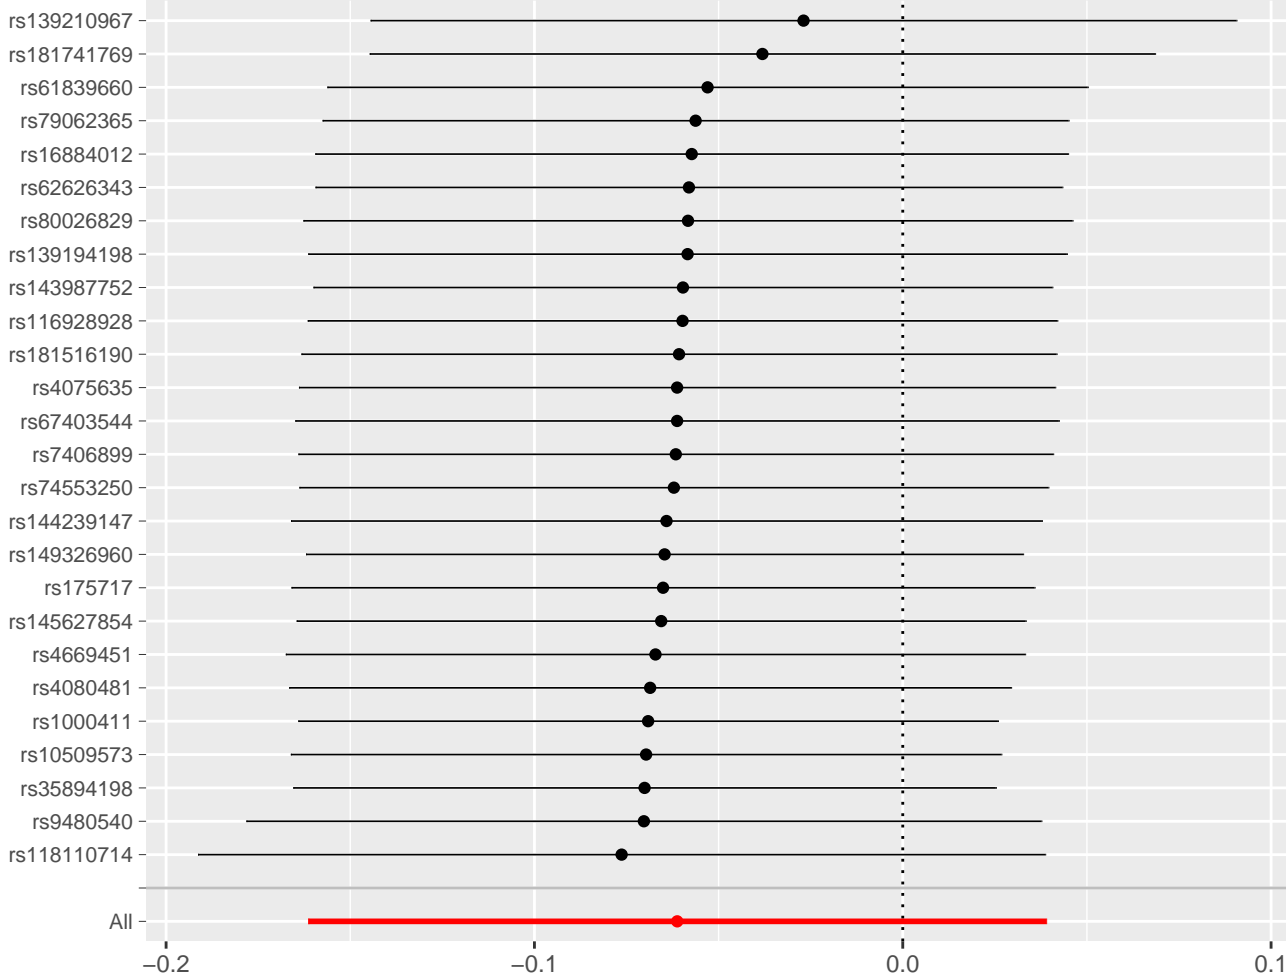

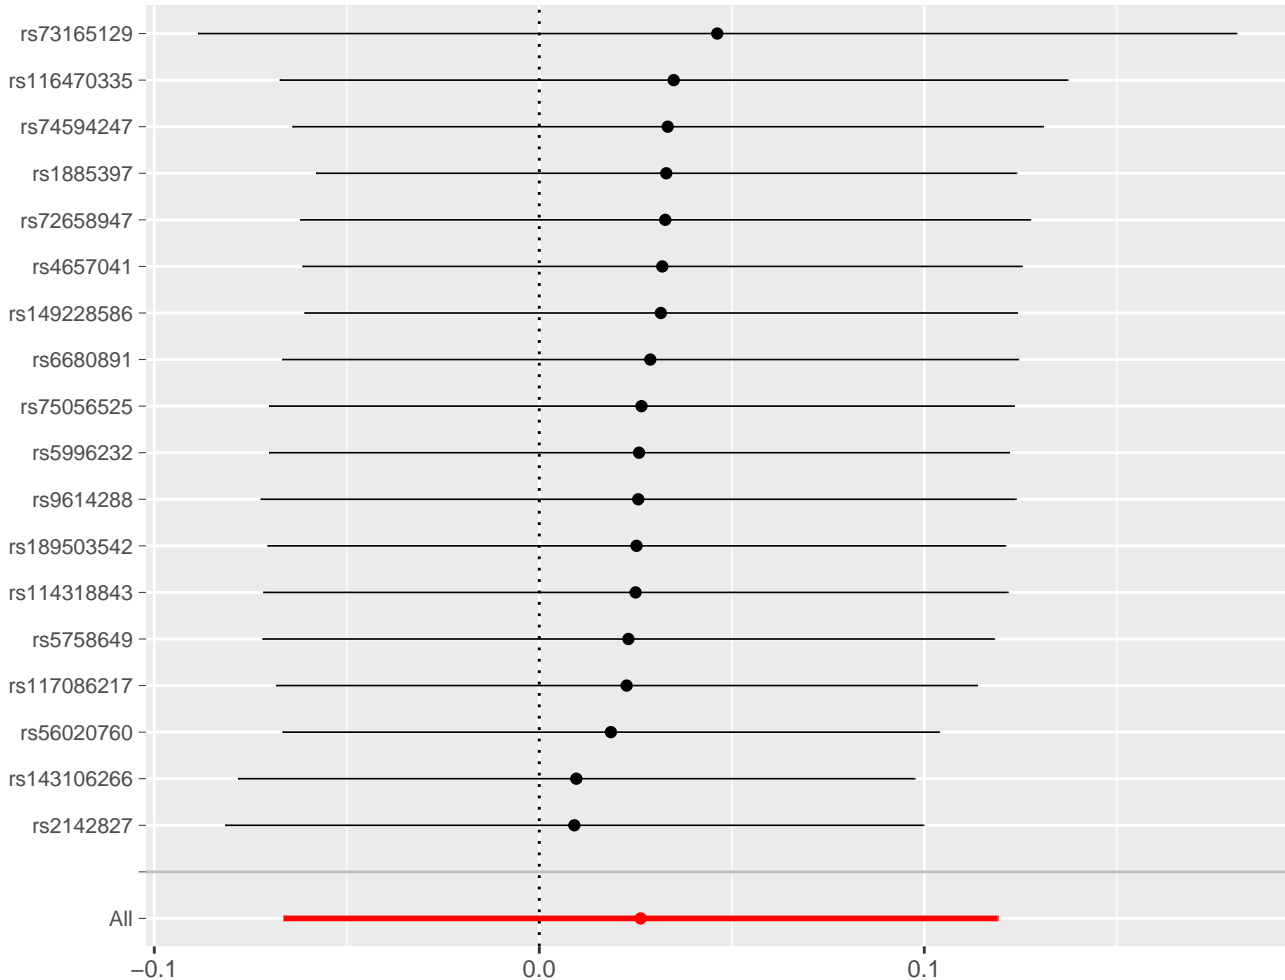

MR leave-one-out sensitivity analysis for 'BAFF-R on IgD+ CD24+' on 'Juvenile arthritis'

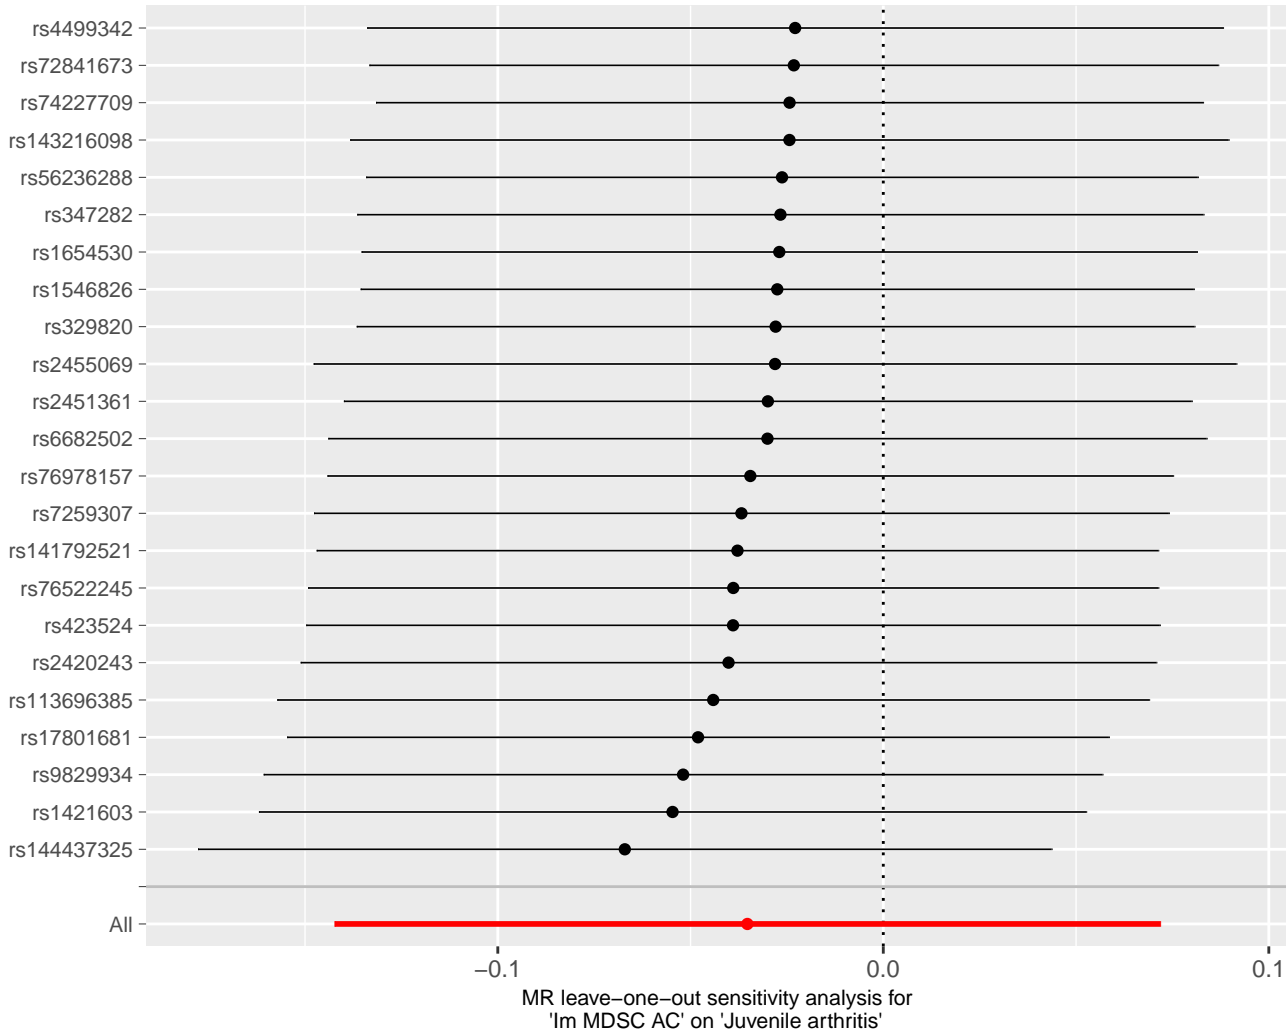

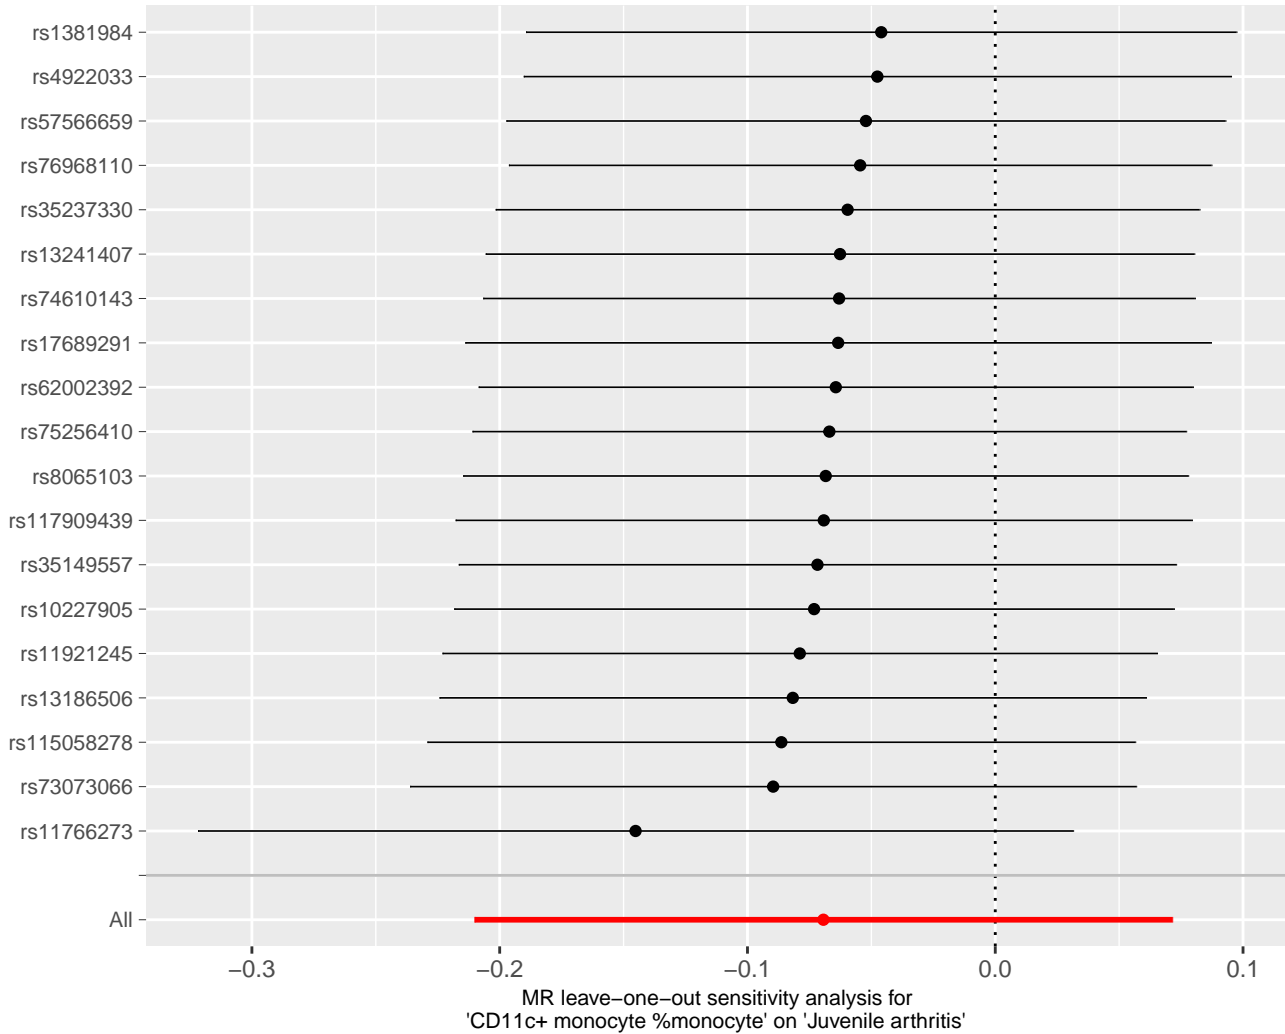



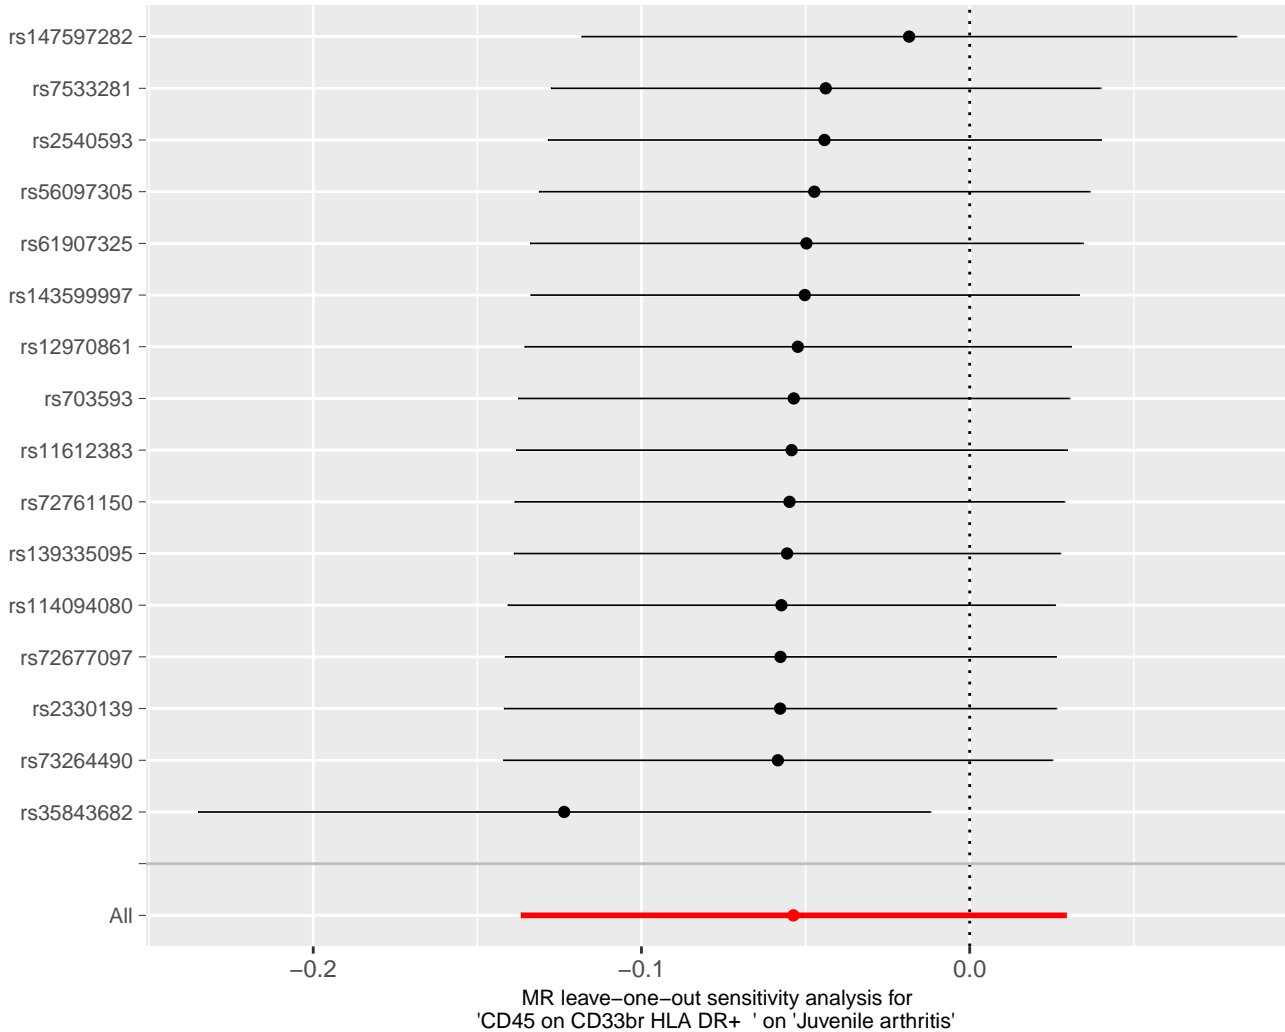

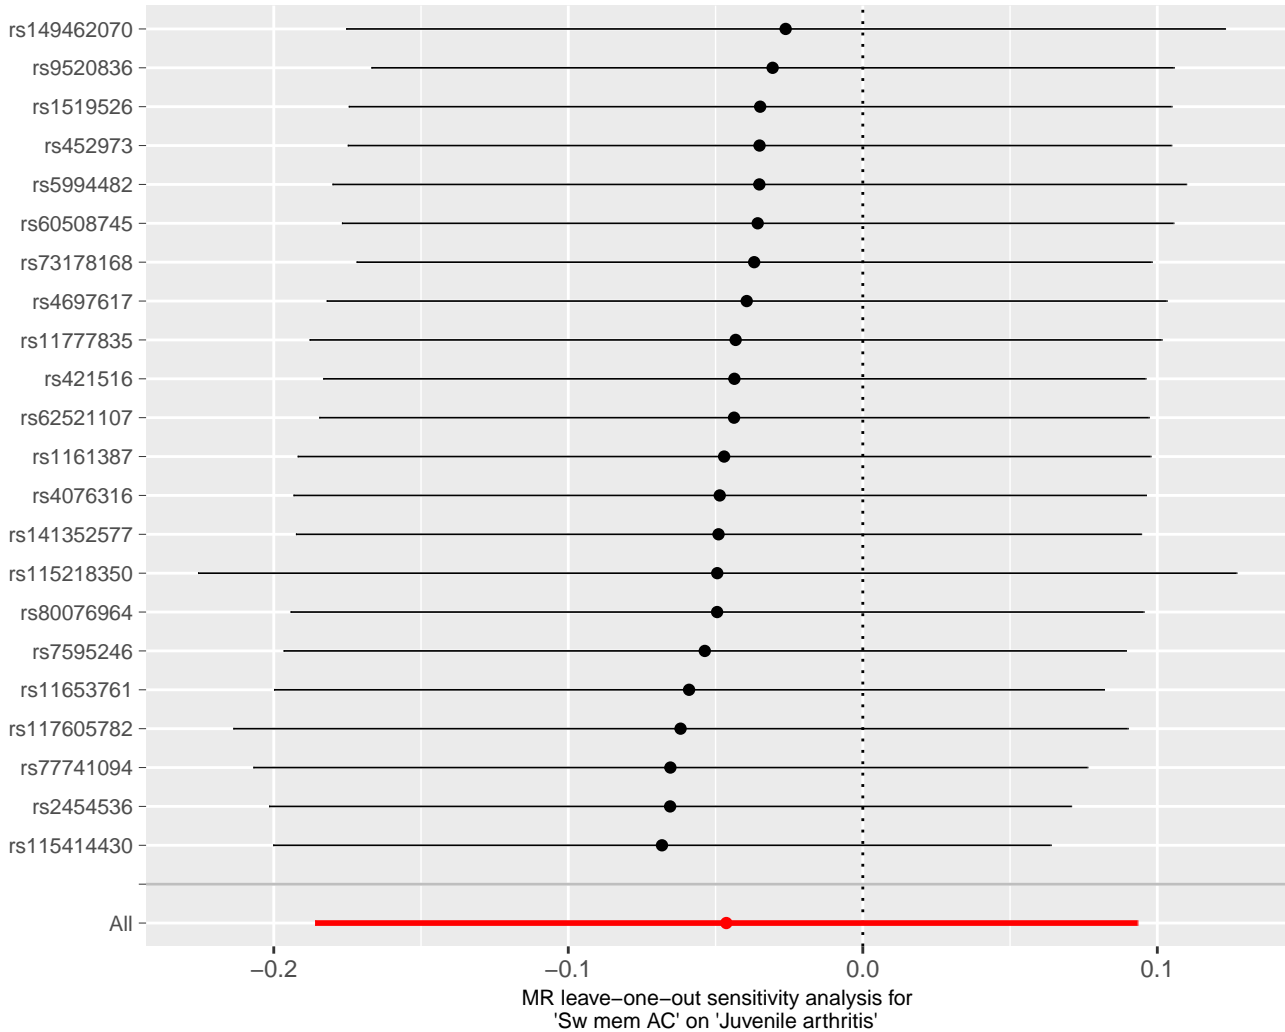

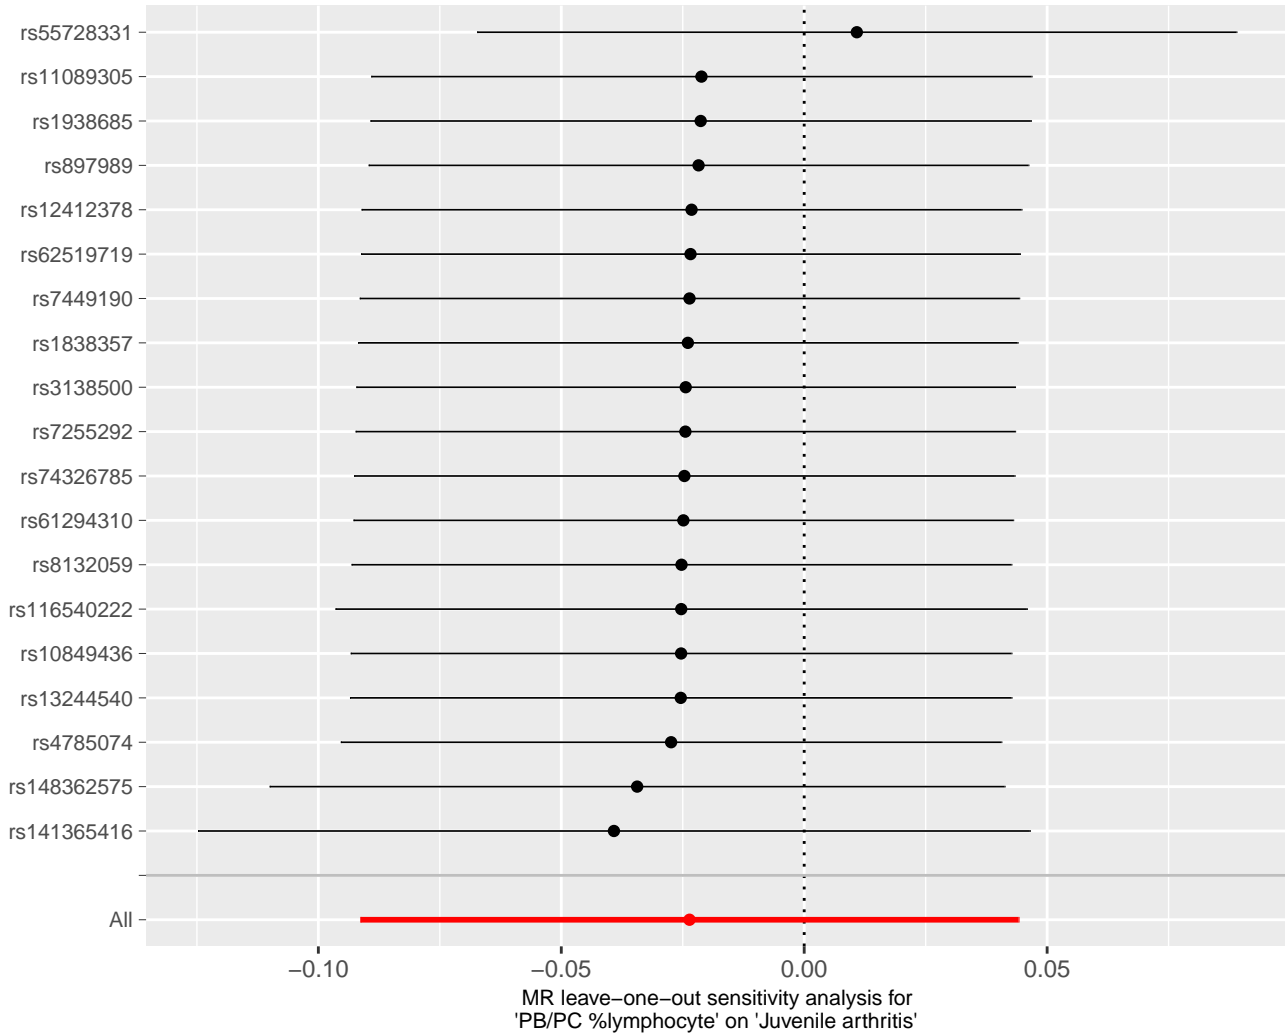

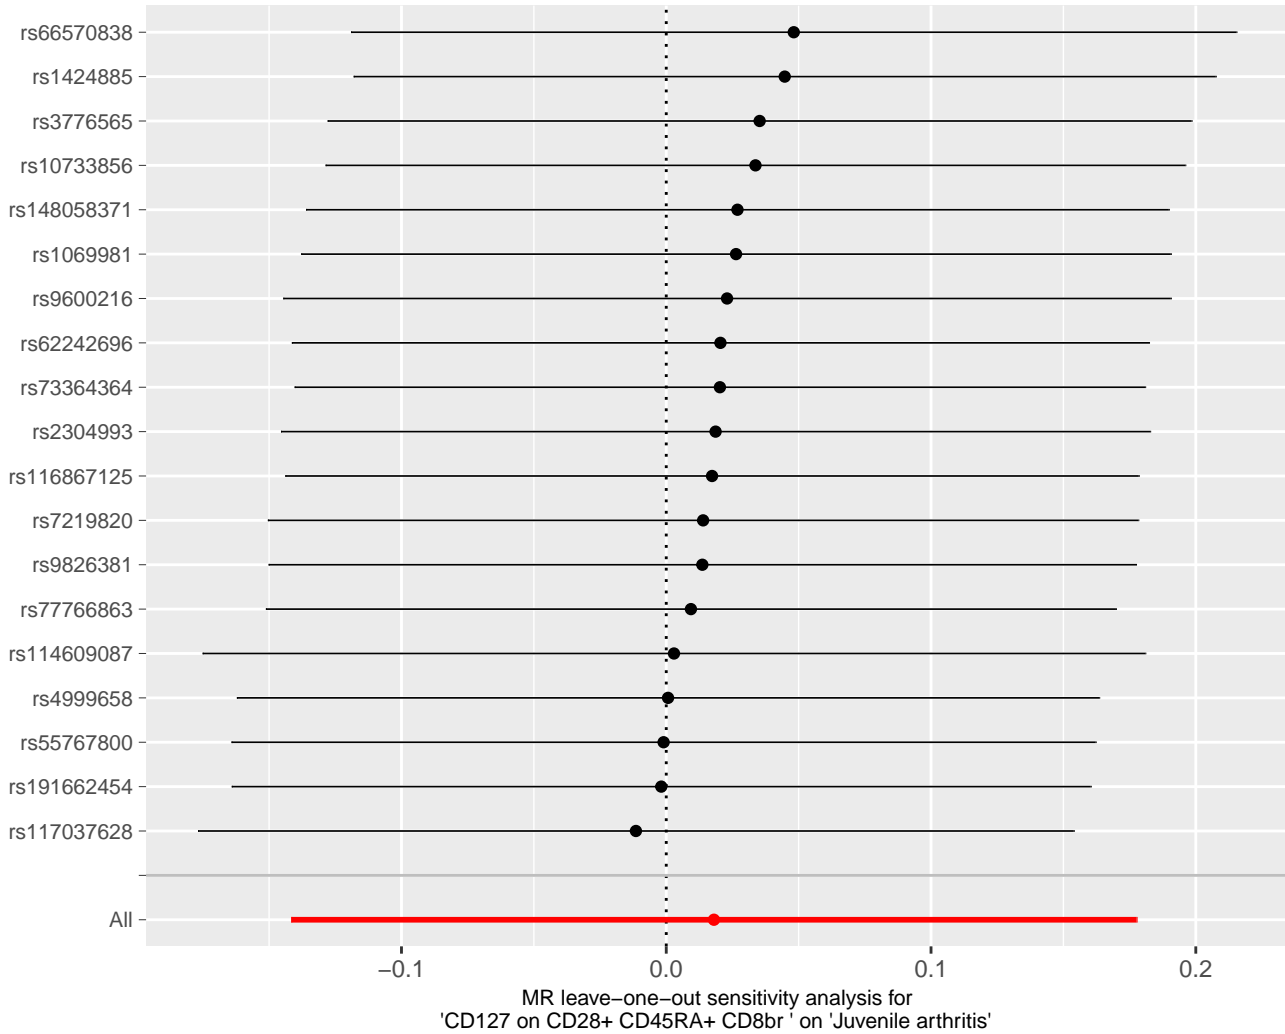

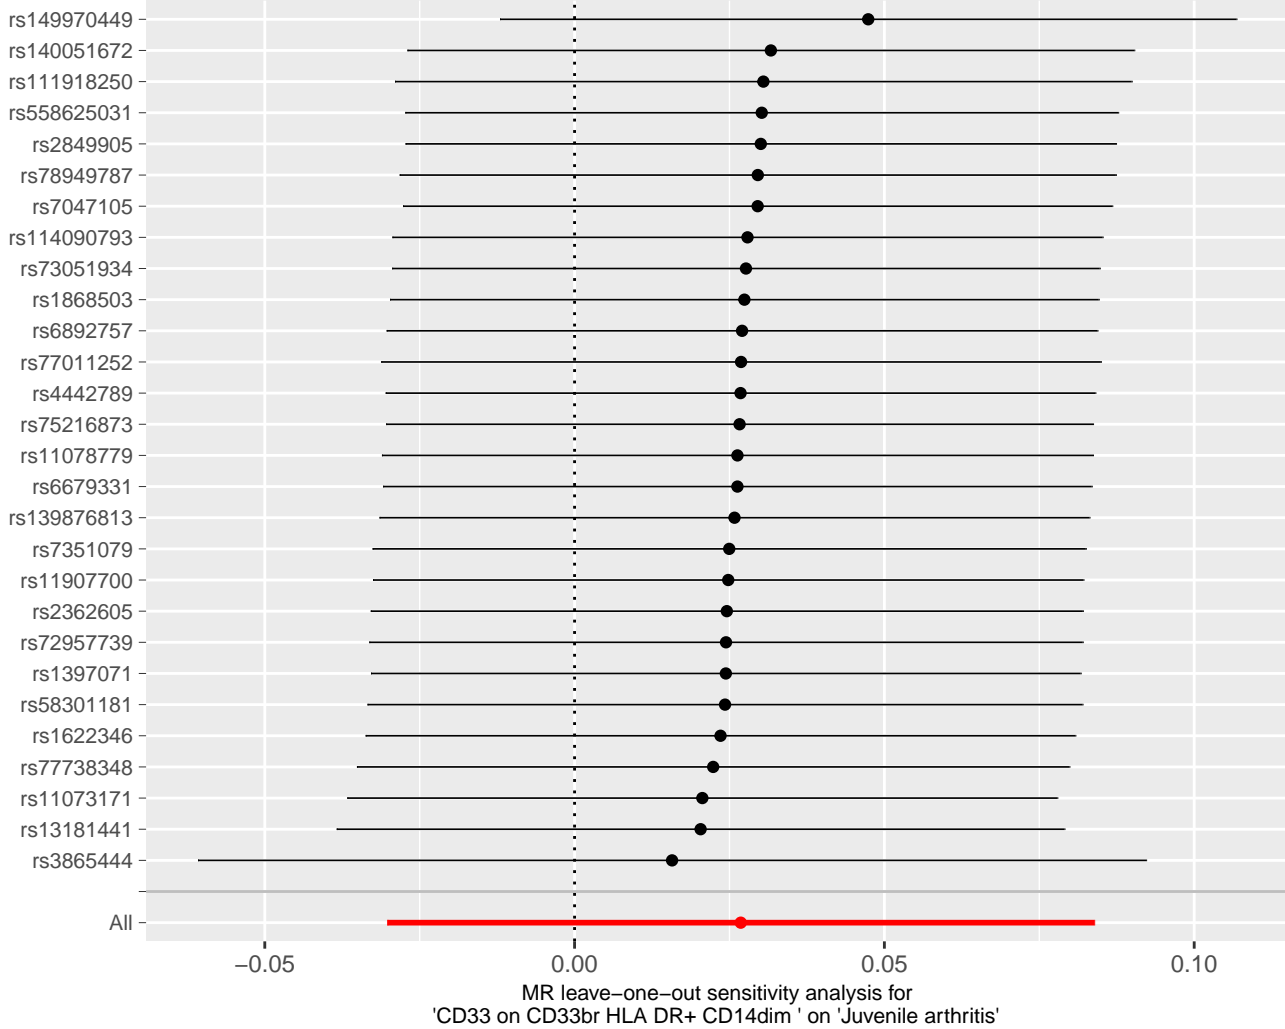

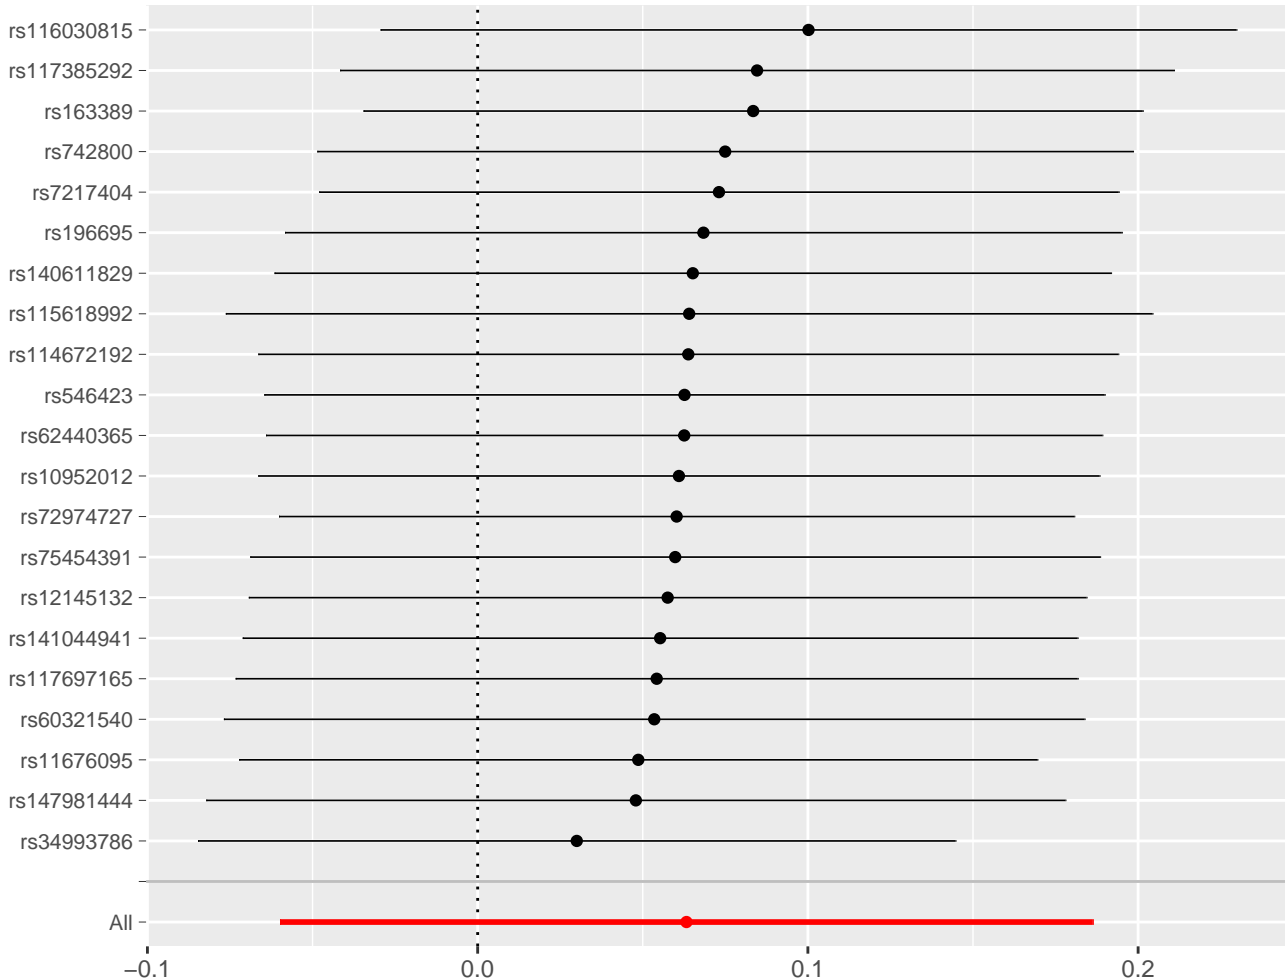

MR leave-one-out sensitivity analysis for 'CD45 on NKT' on 'Juvenile arthritis'

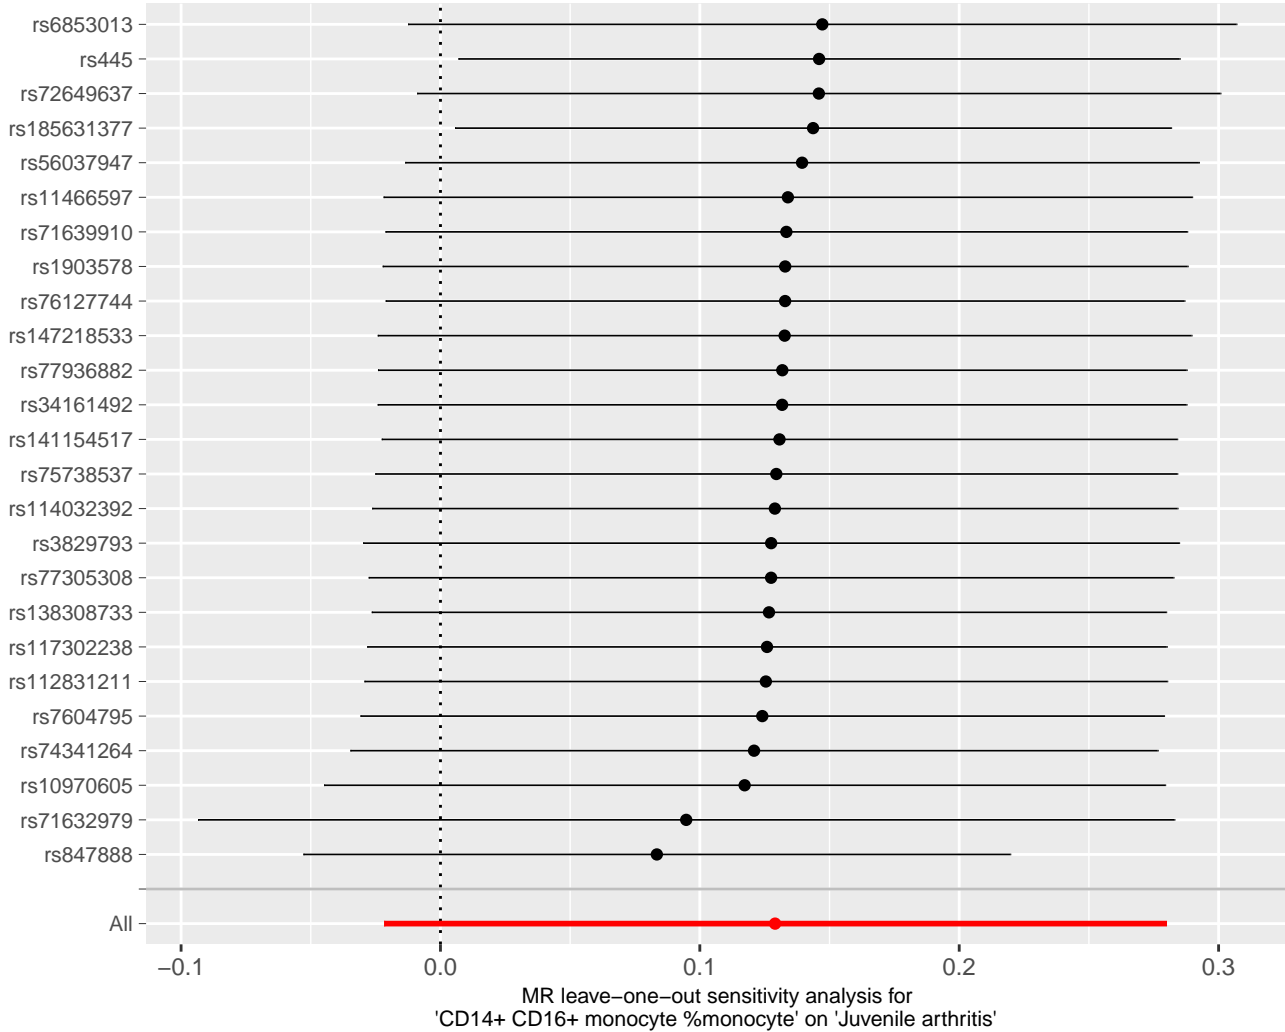

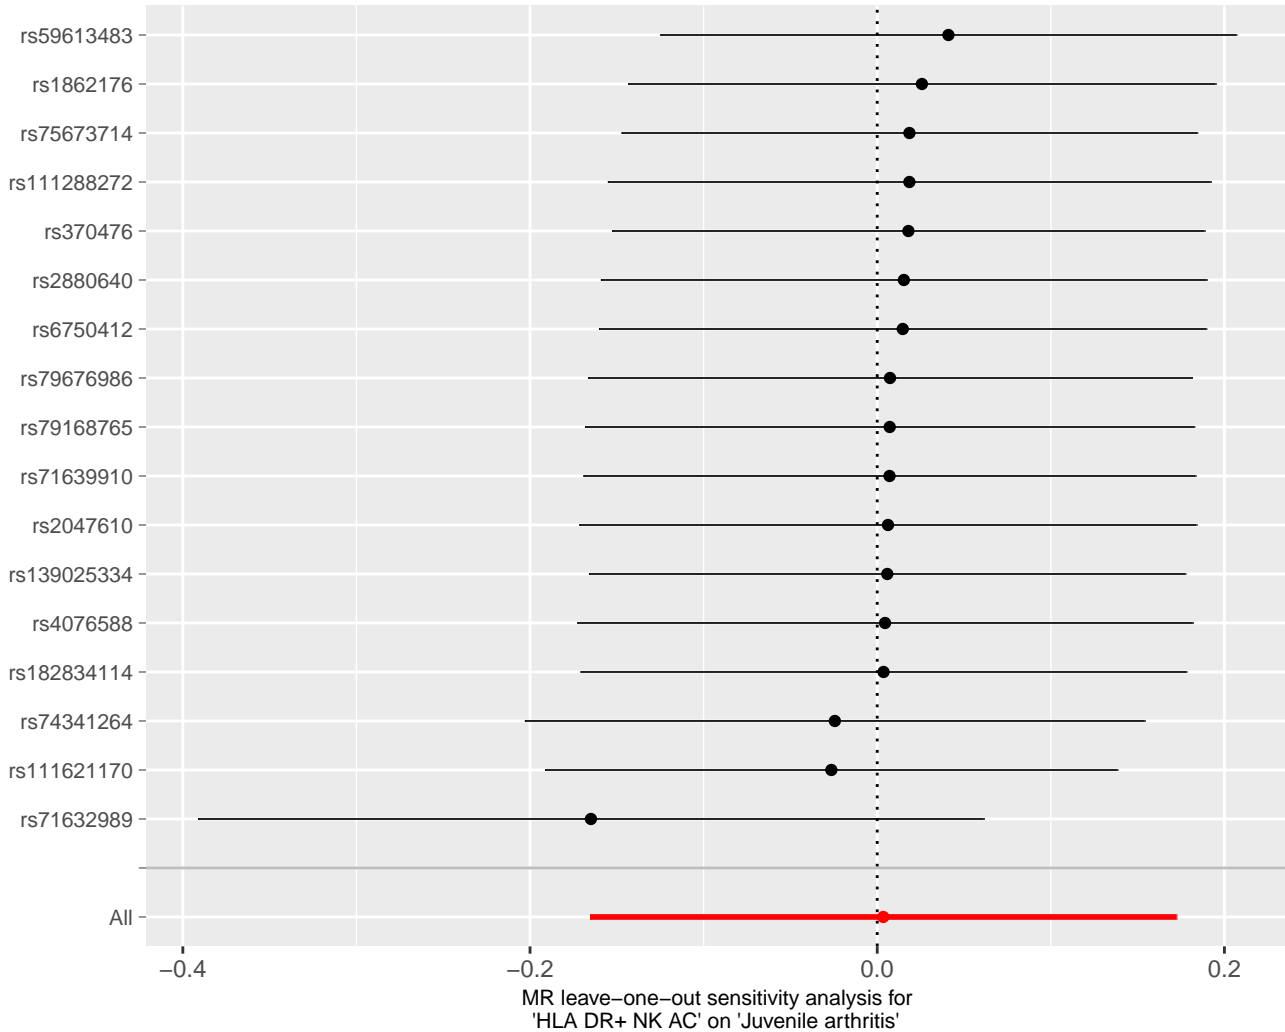



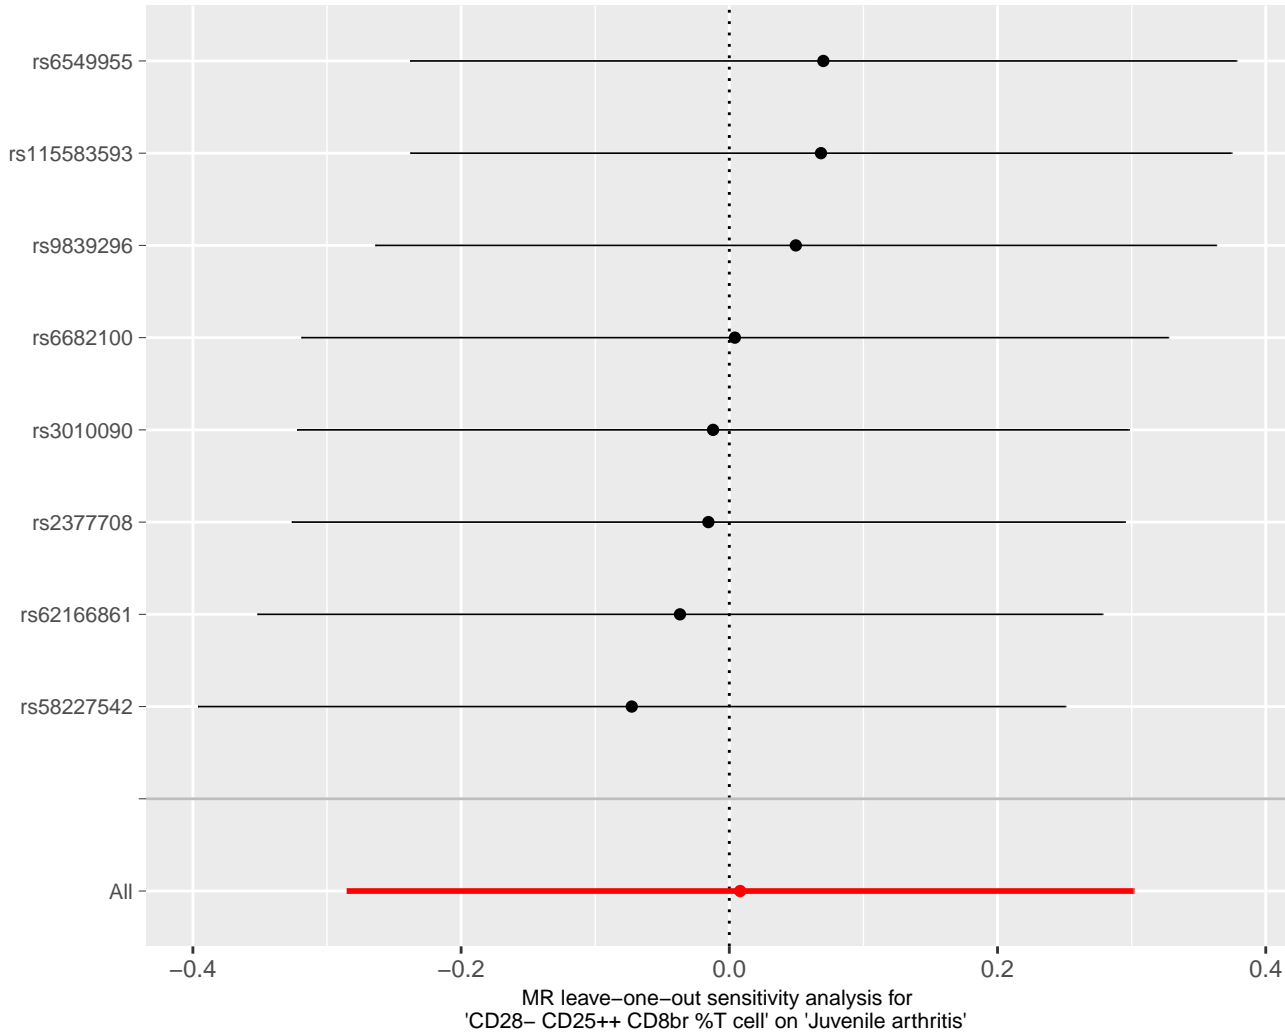

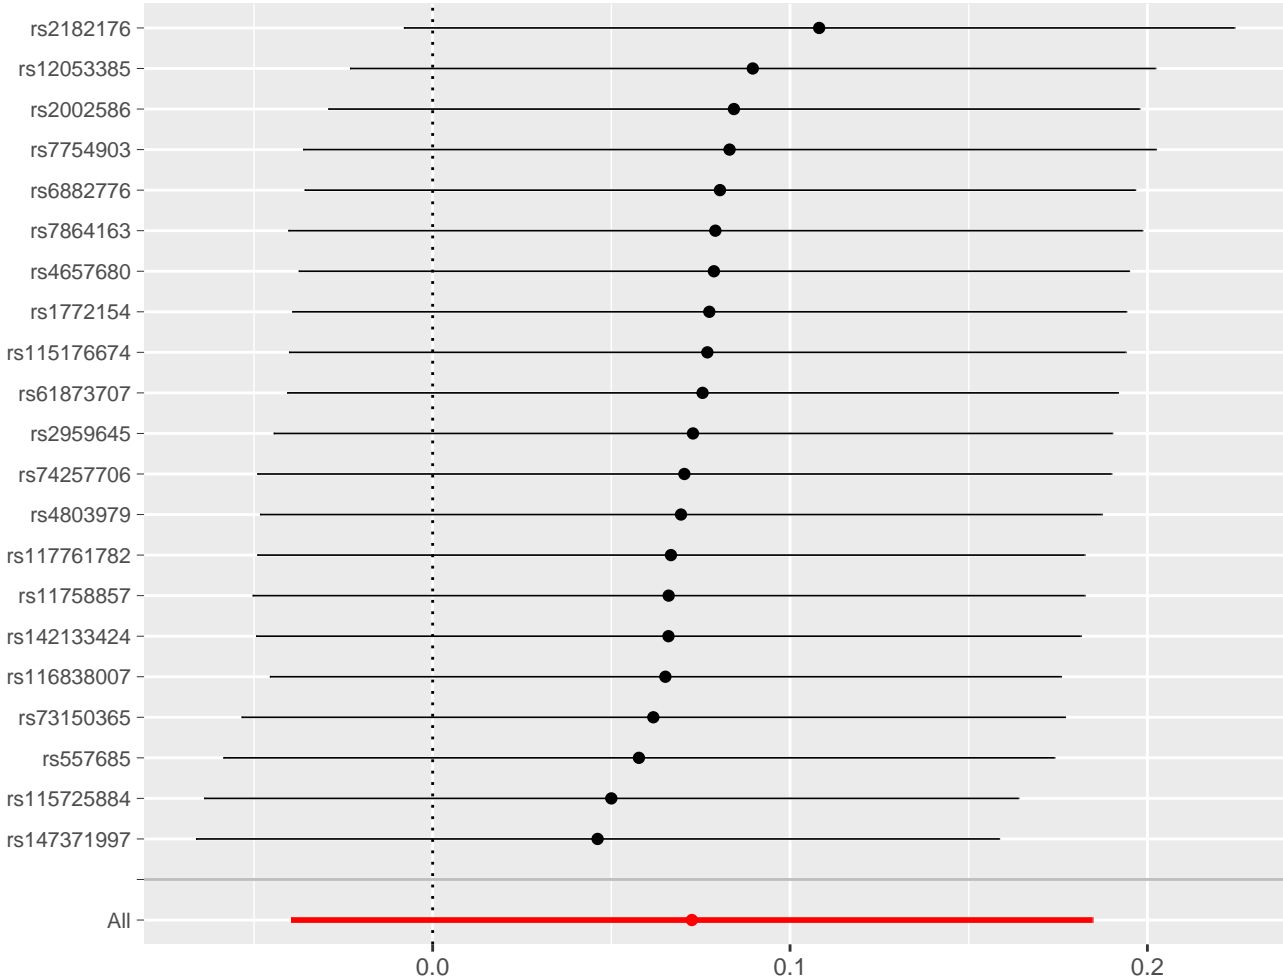

MR leave-one-out sensitivity analysis for 'HVEM on EM CD4+' on 'Juvenile arthritis'

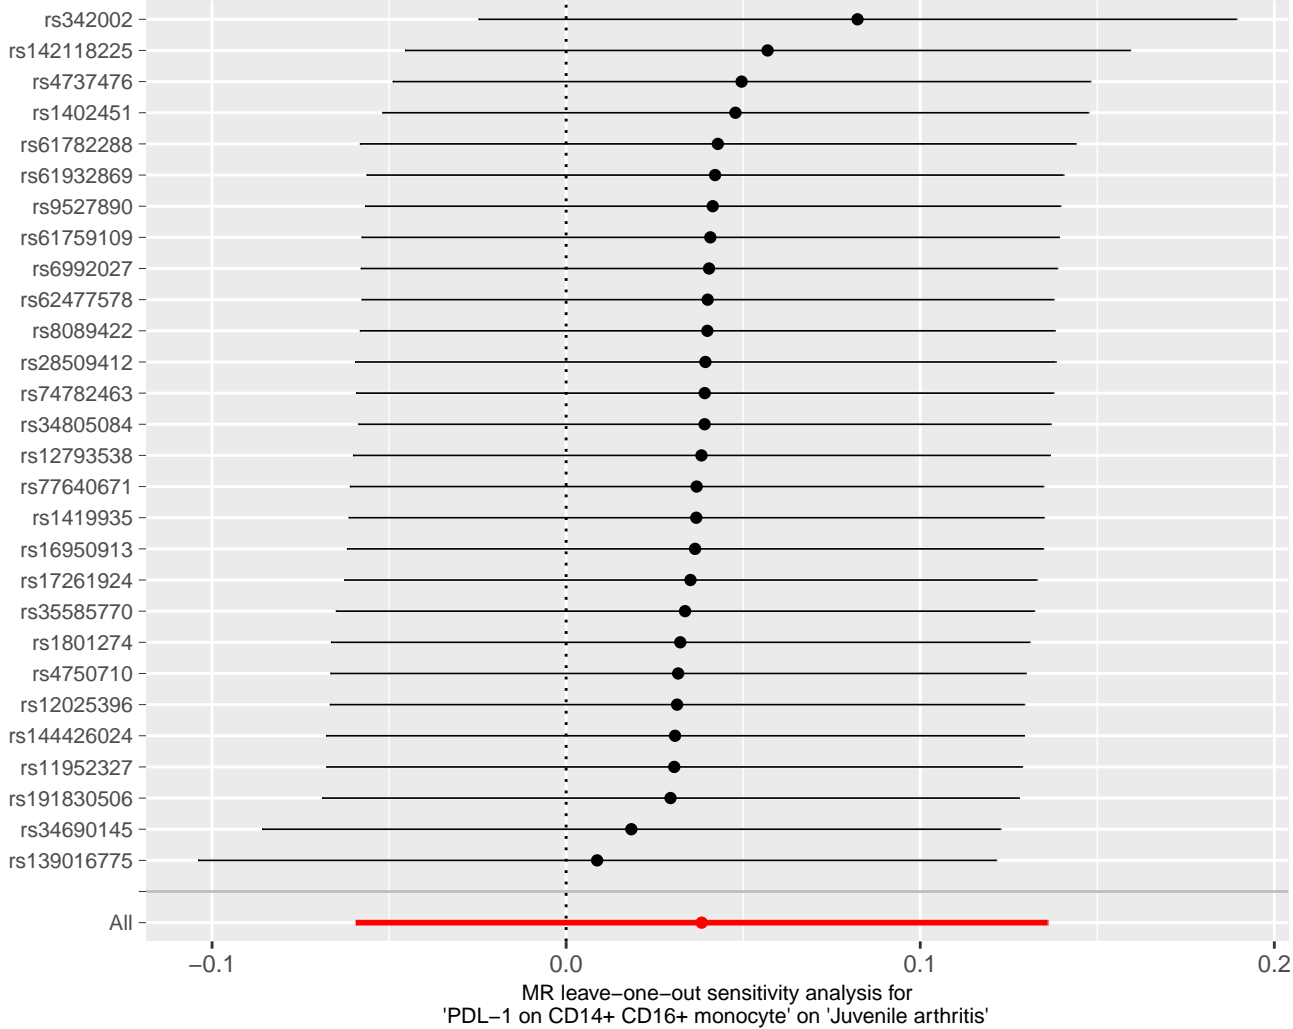

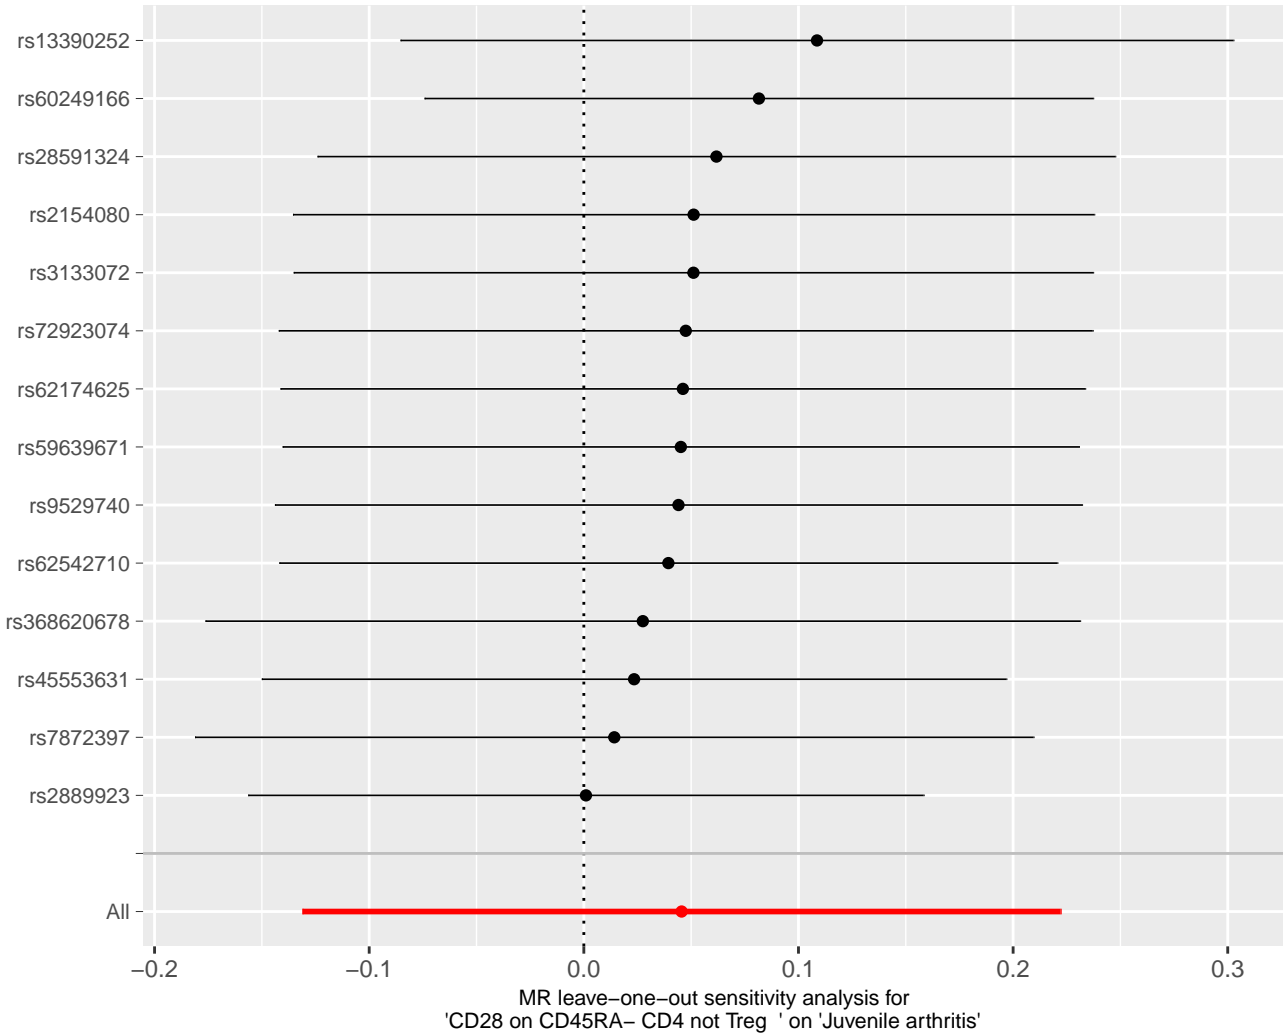

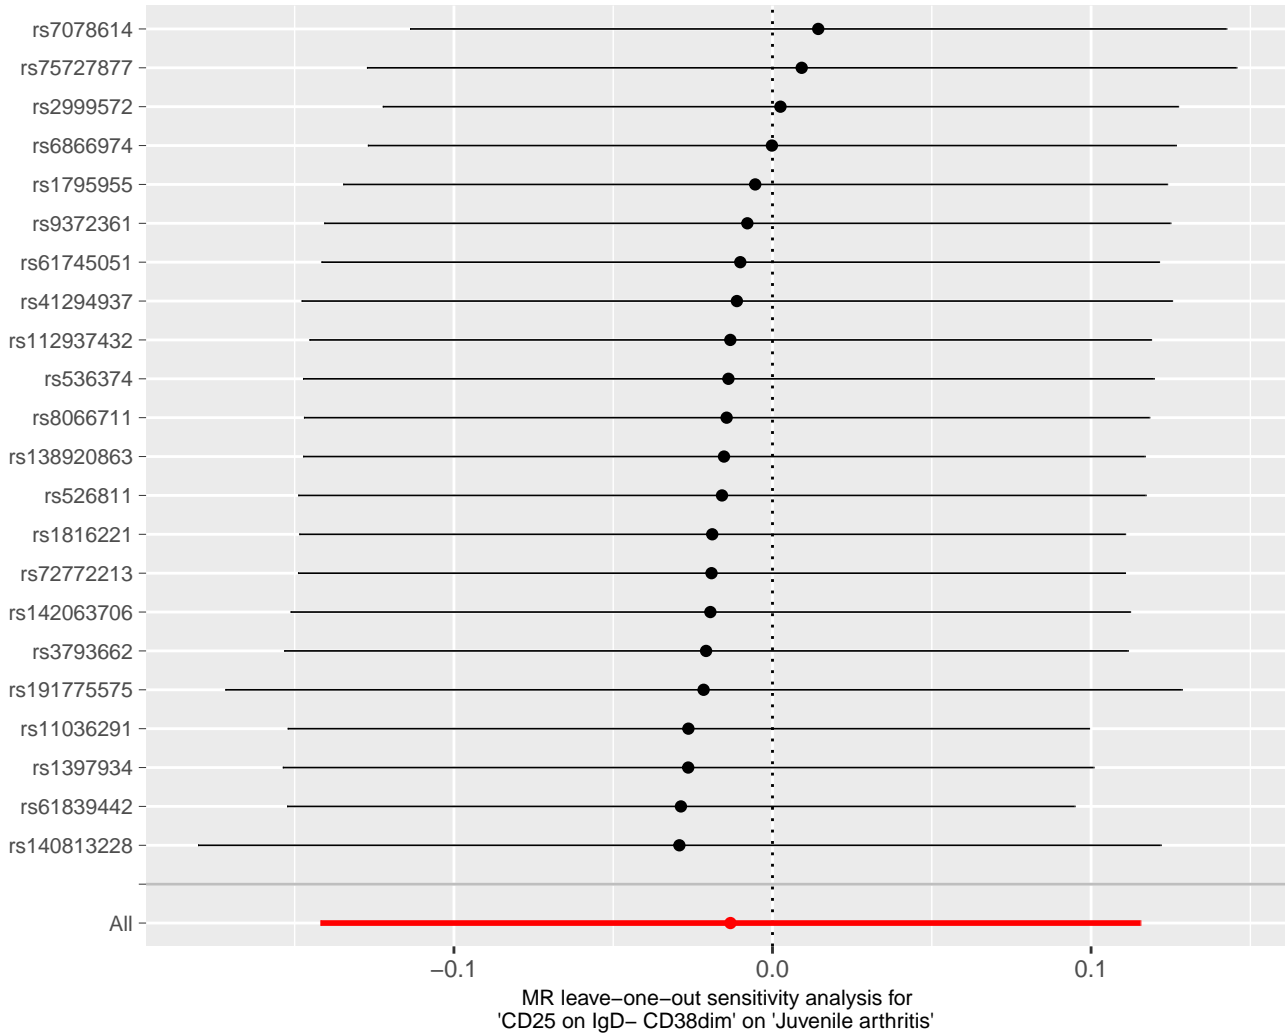

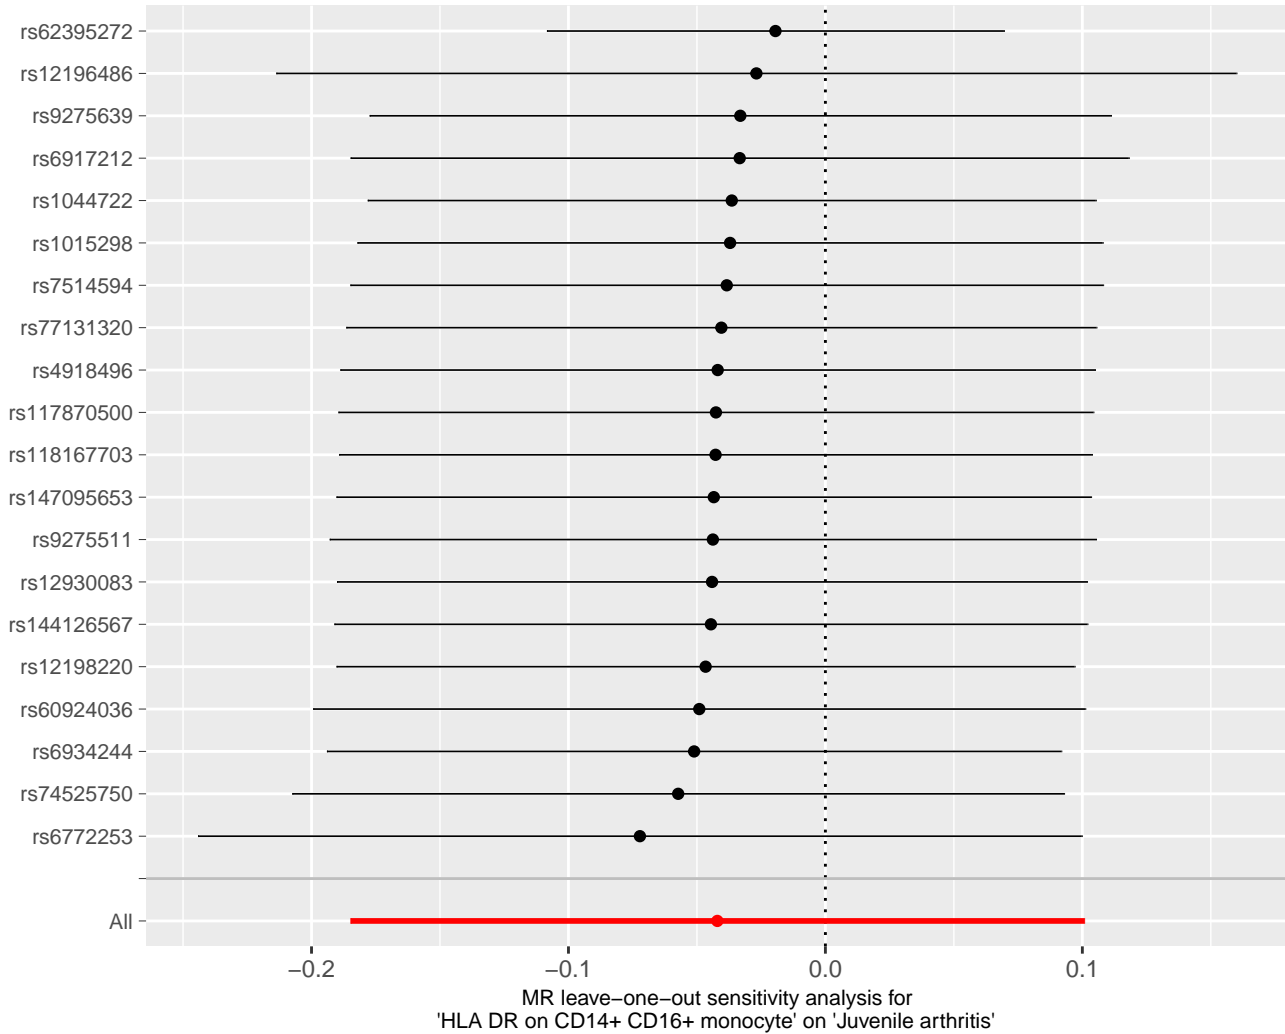

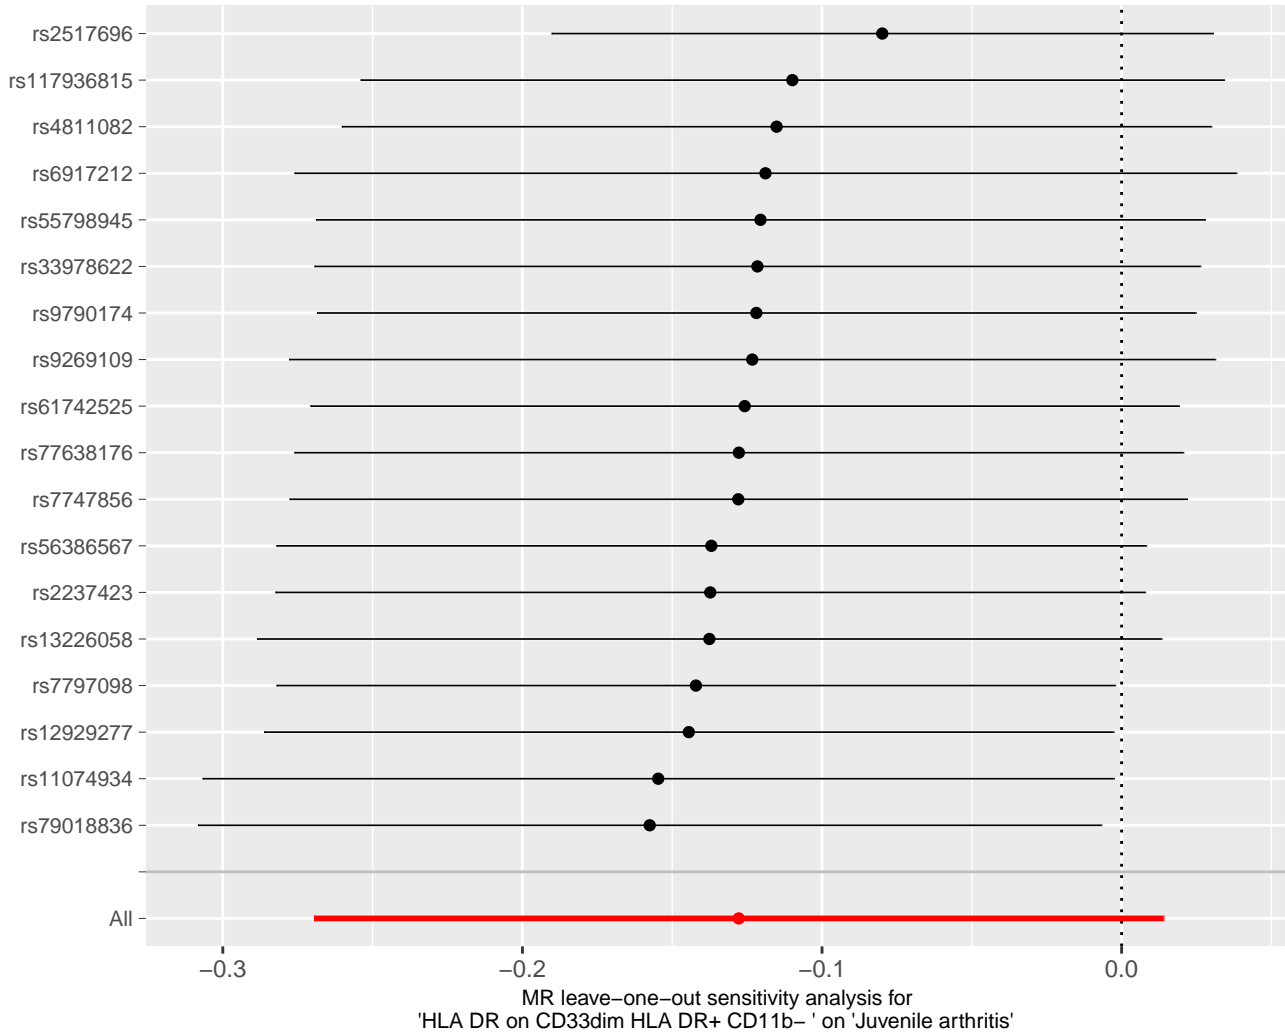

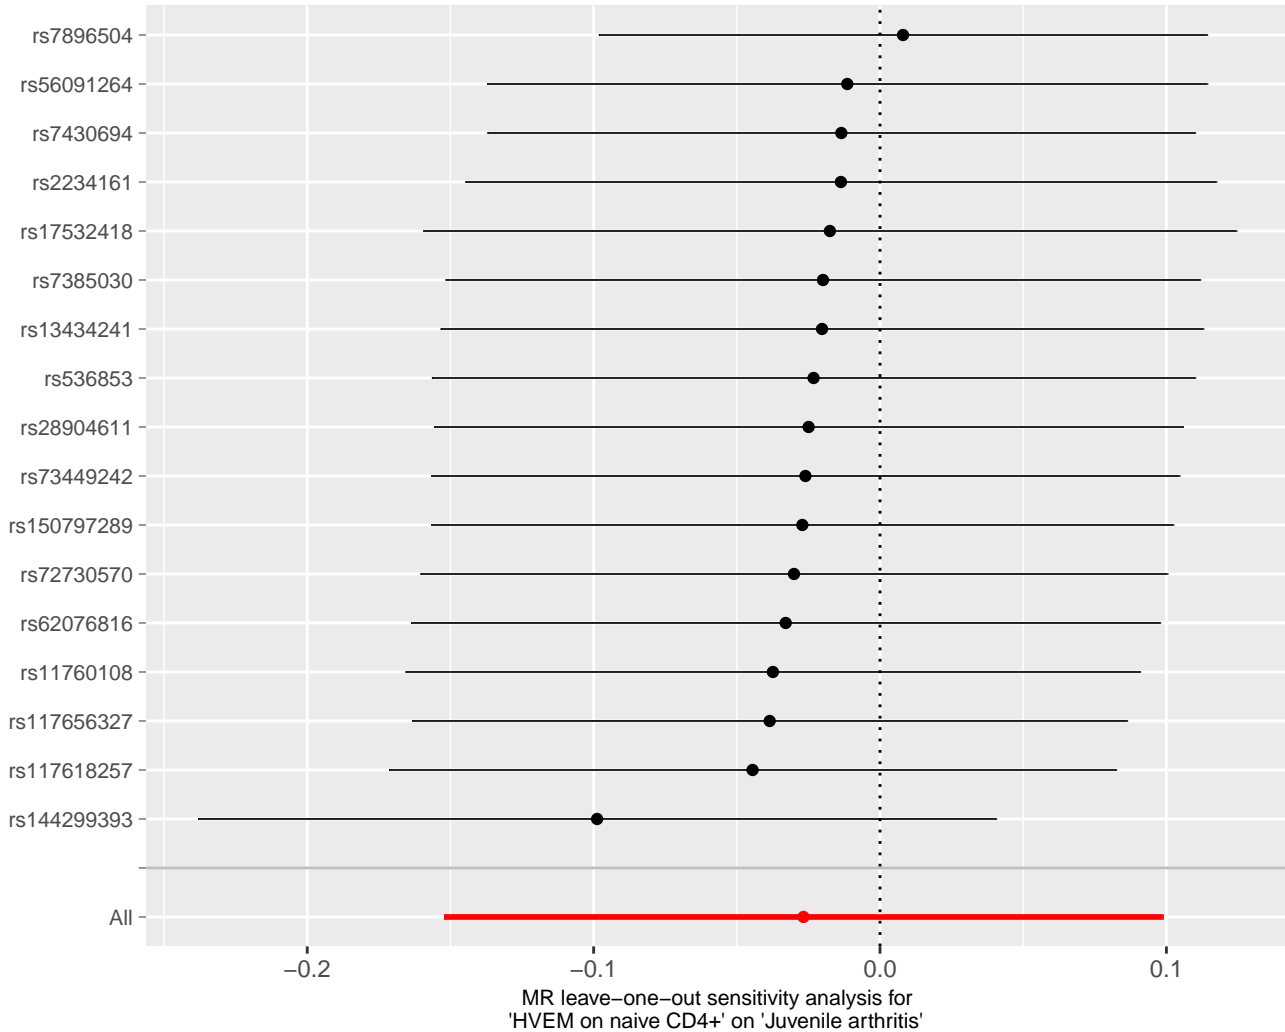



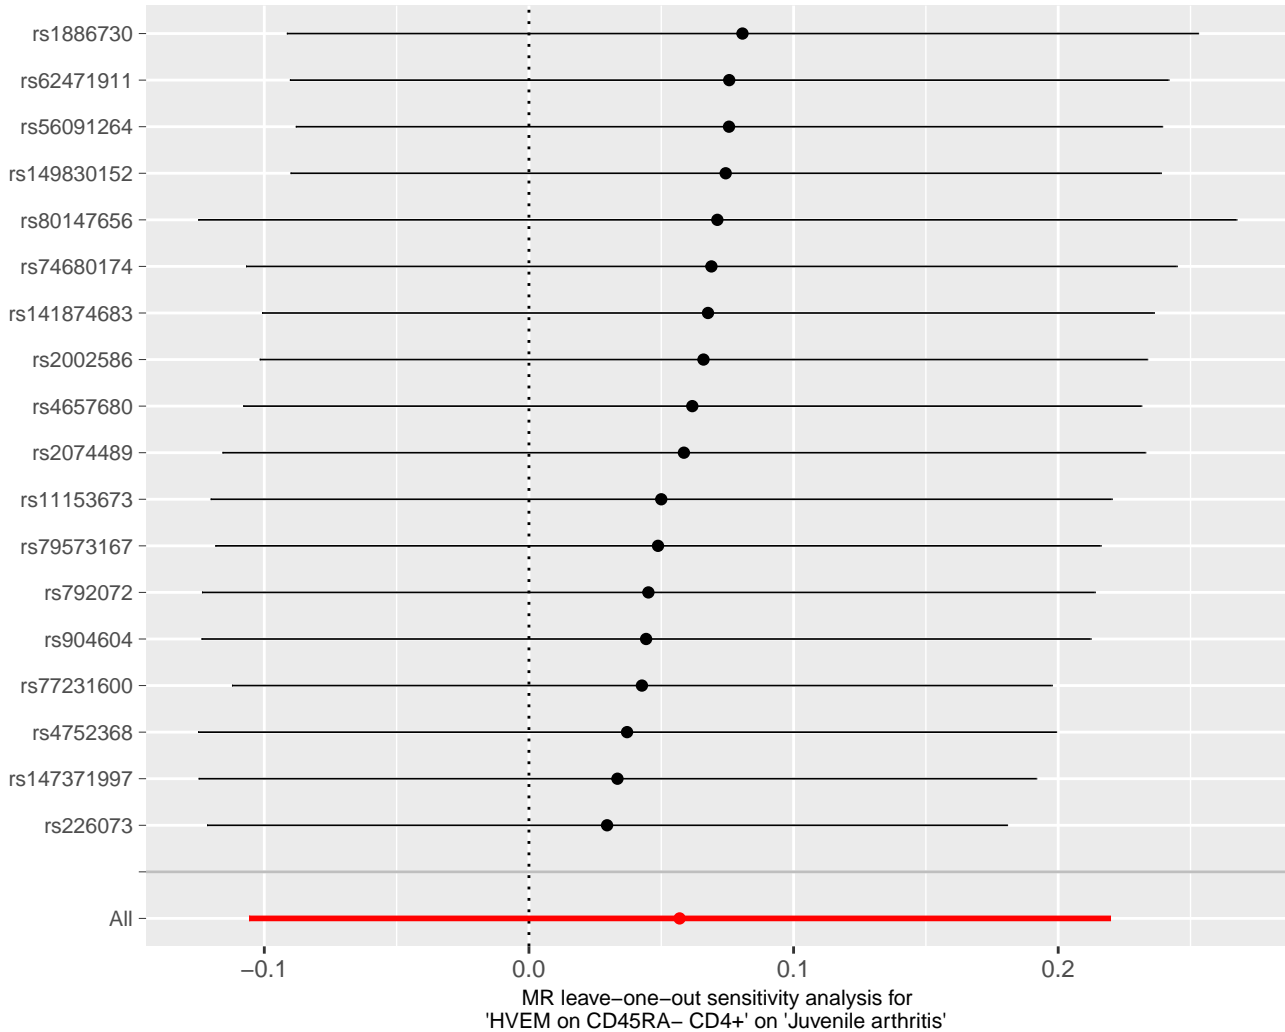

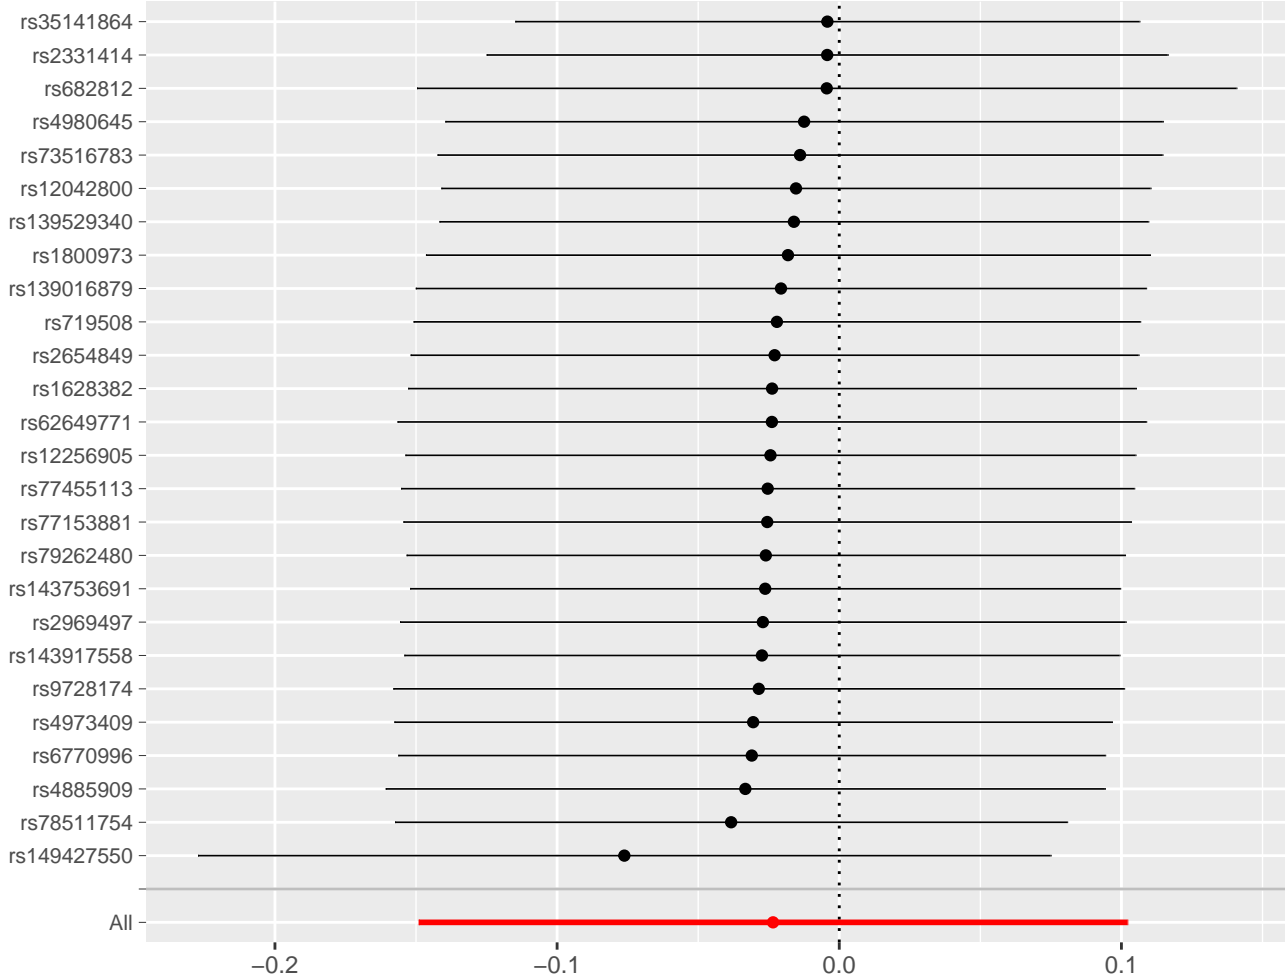

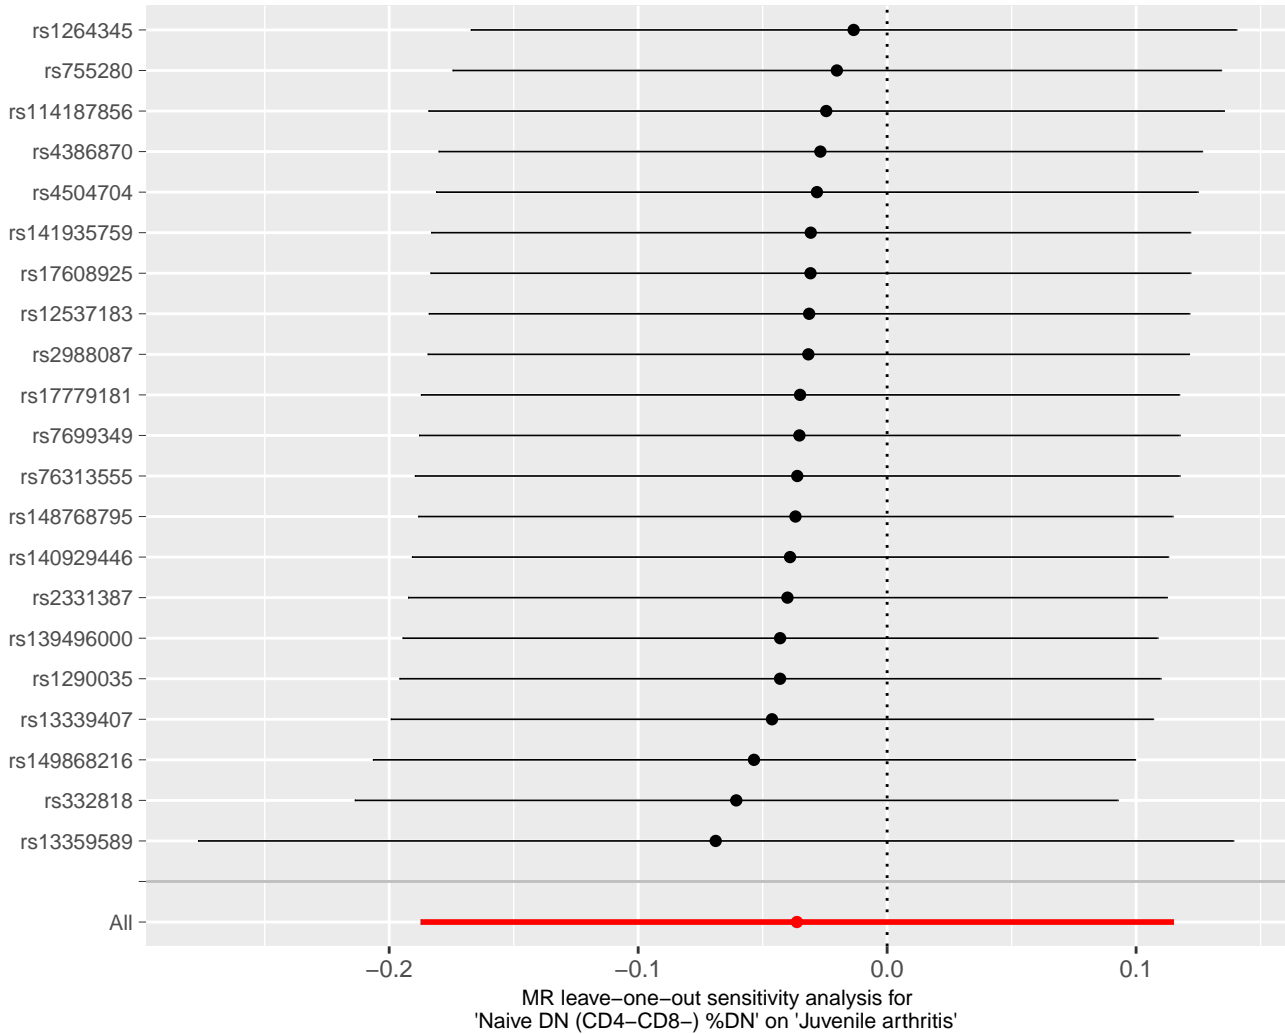

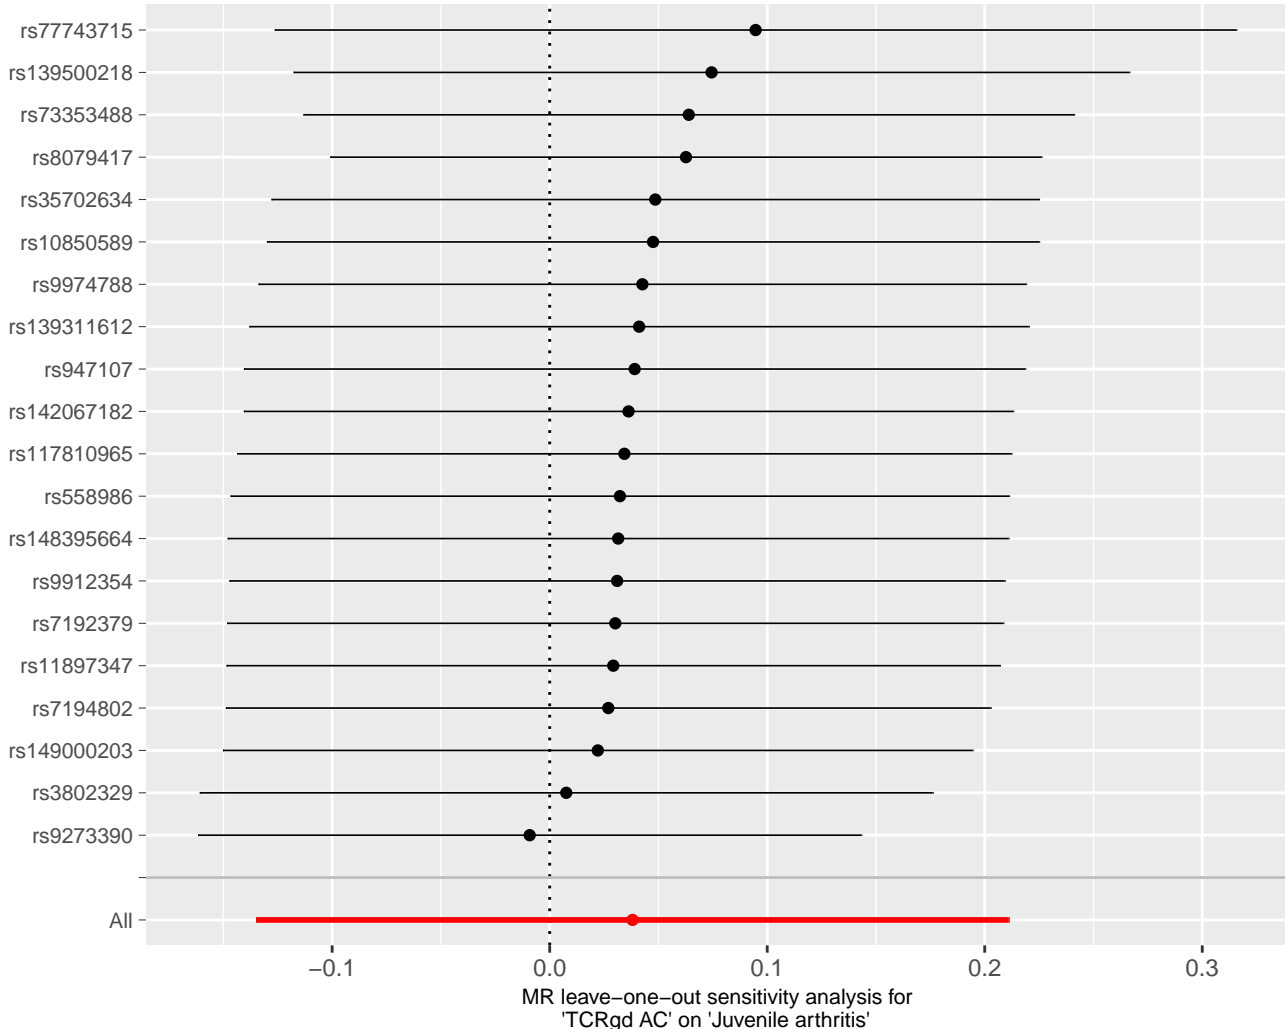

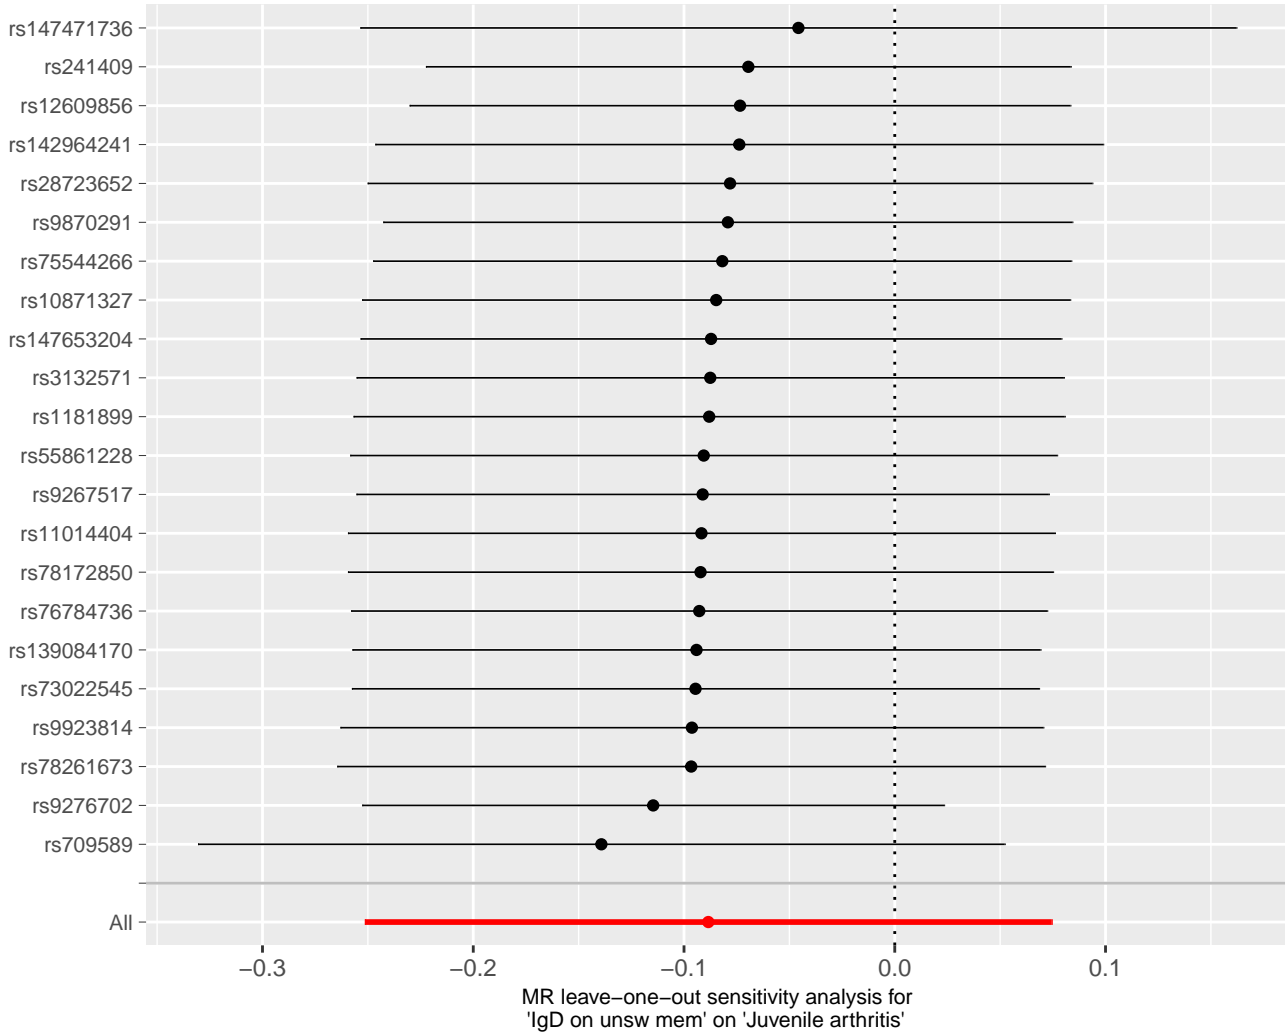

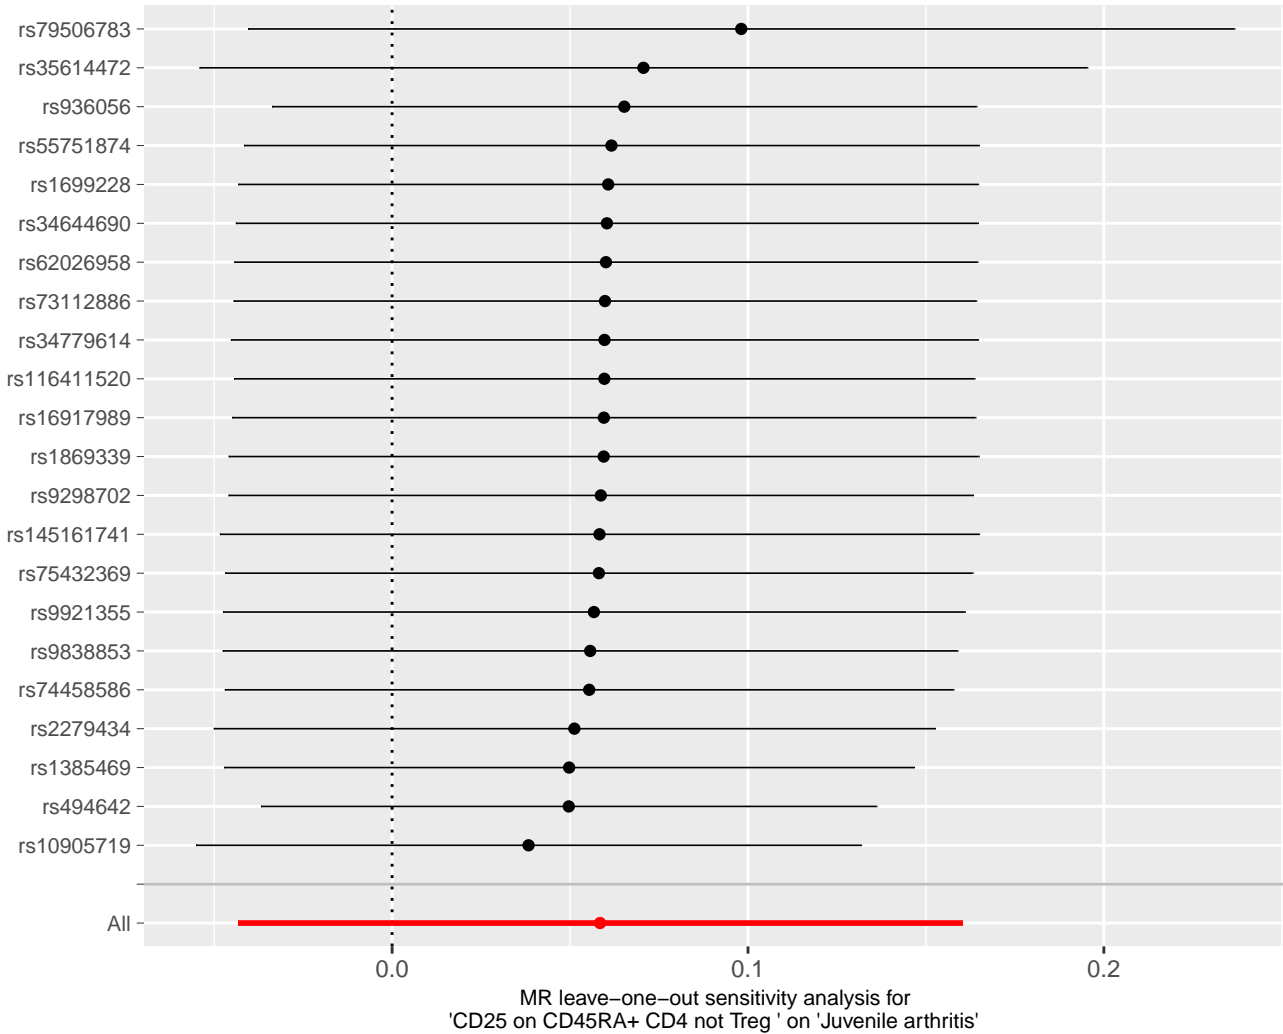

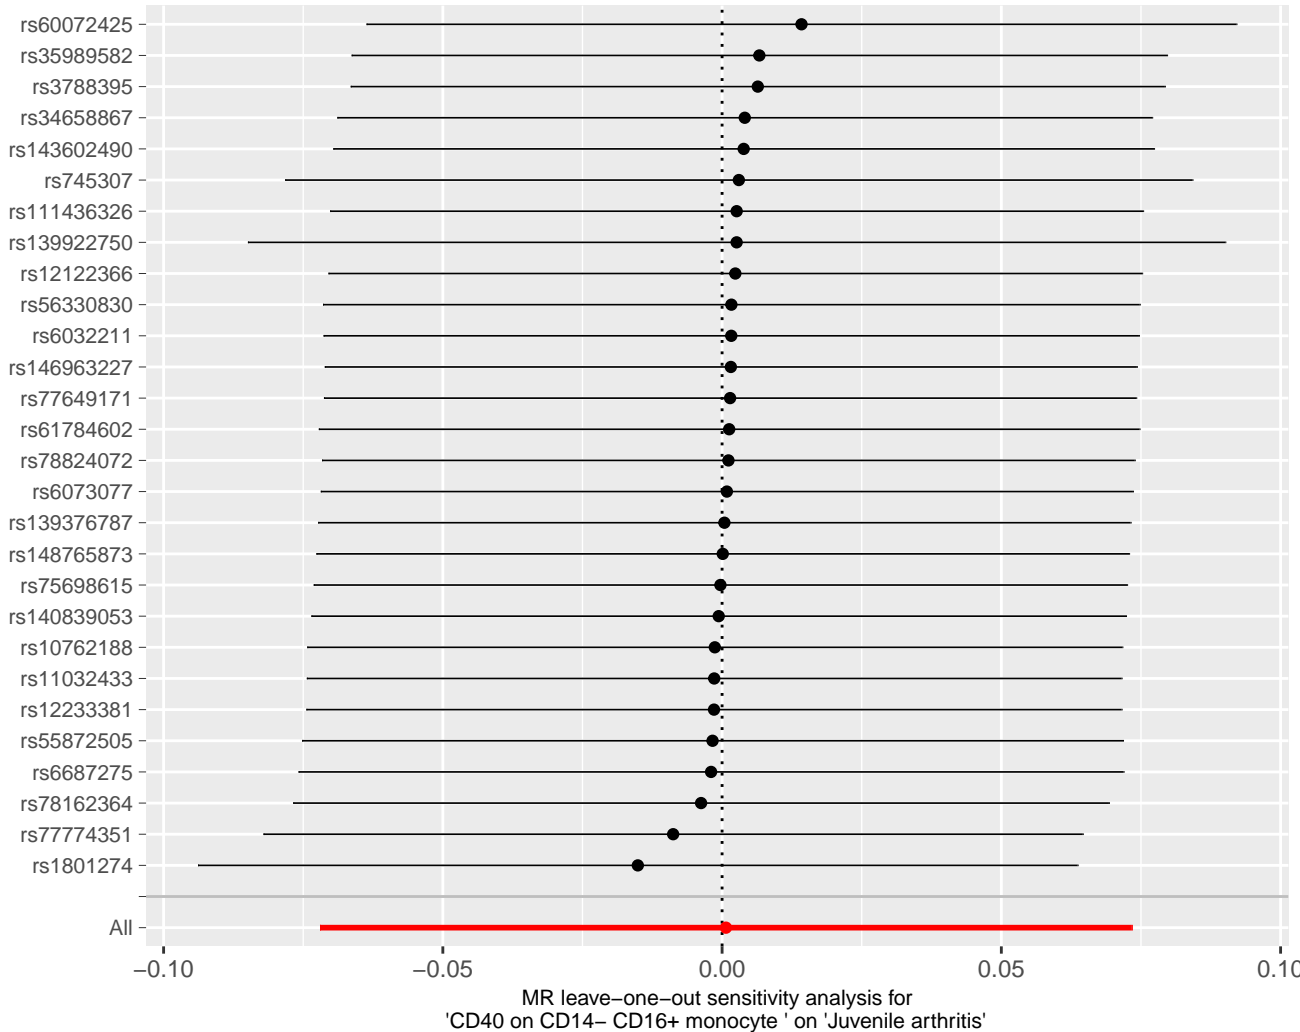

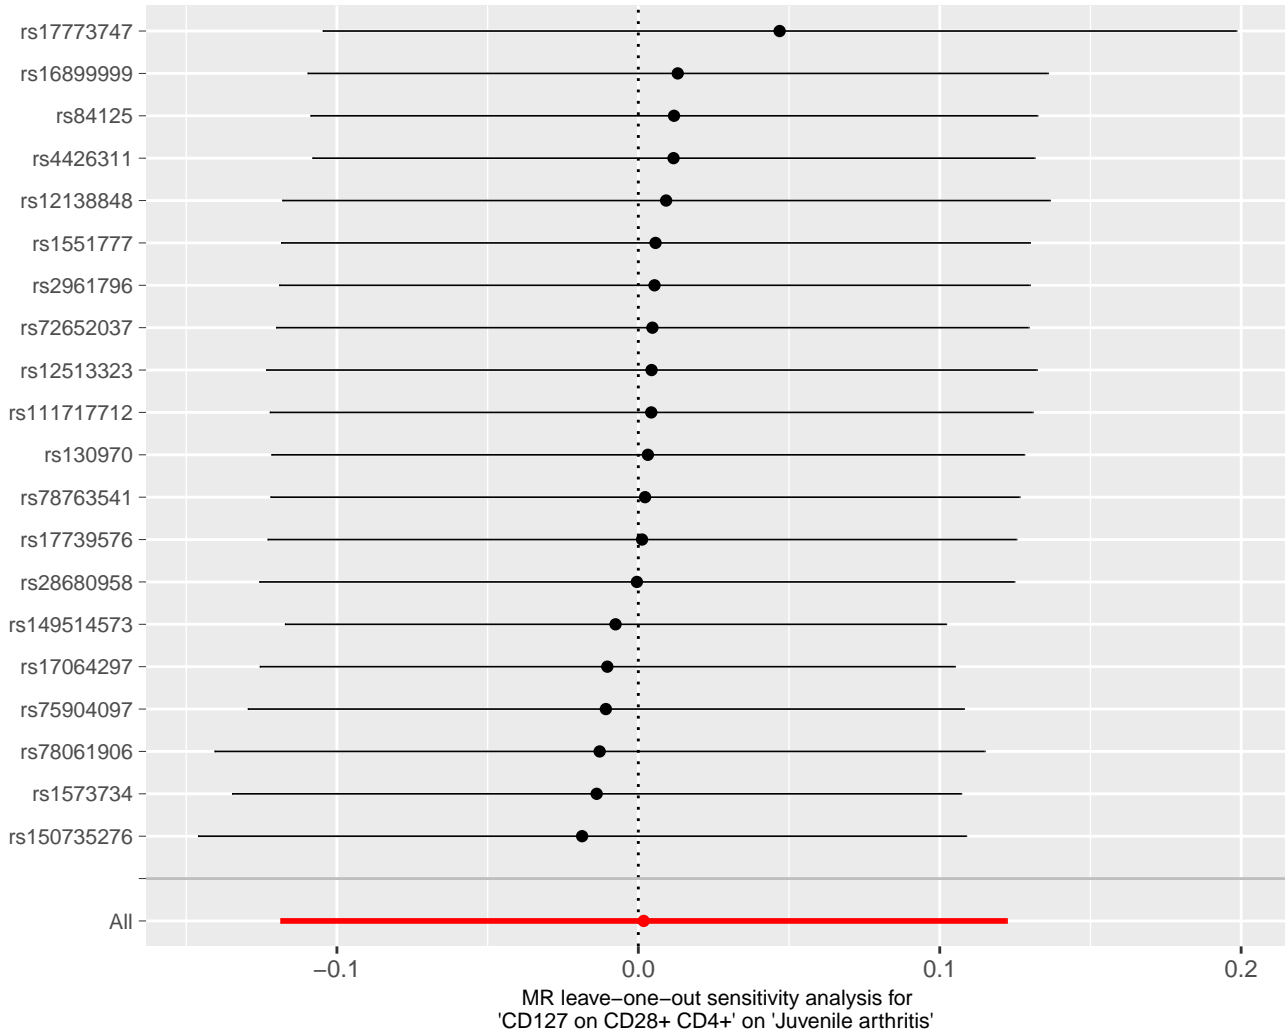



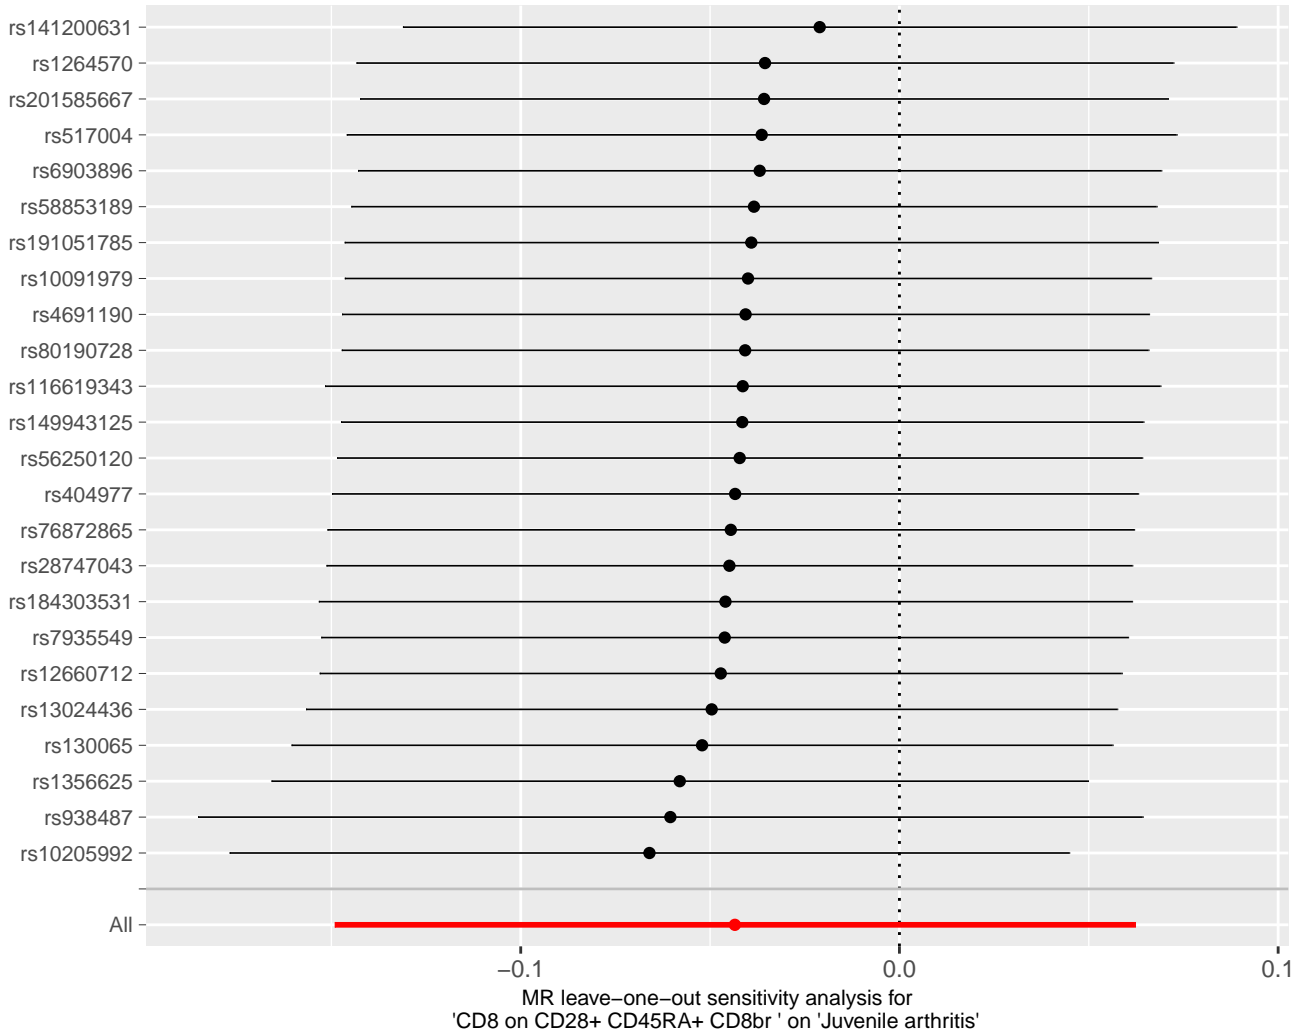

MR leave-one-out sensitivity analysis for 'CD8 on CD28+ CD45RA+ CD8br' on 'Juvenile arthritis'

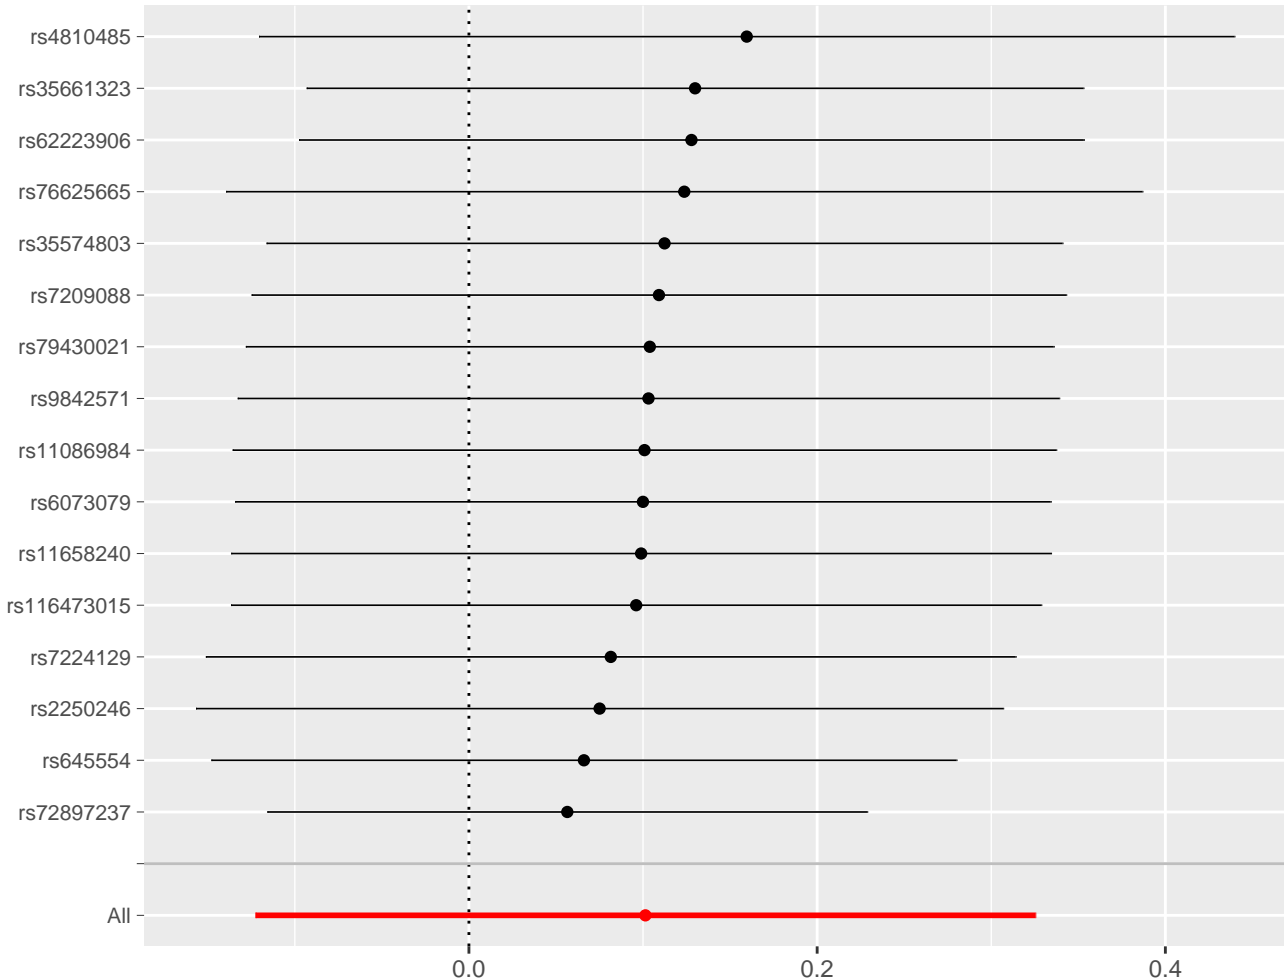

MR leave-one-out sensitivity analysis for 'IgD- CD27- %B cell' on 'Juvenile arthritis'

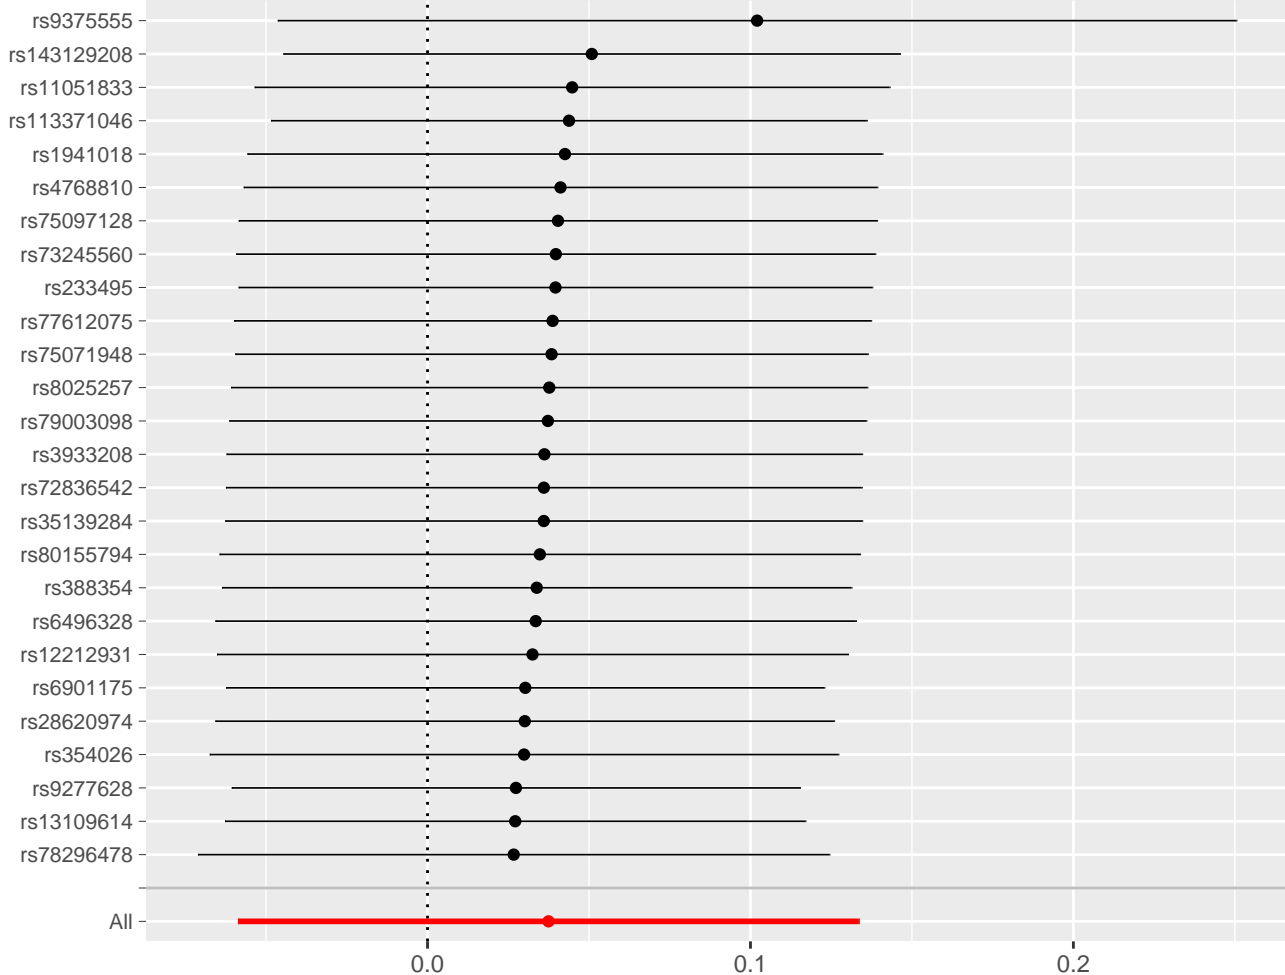

MR leave-one-out sensitivity analysis for 'CD20 on B cell' on 'Juvenile arthritis'

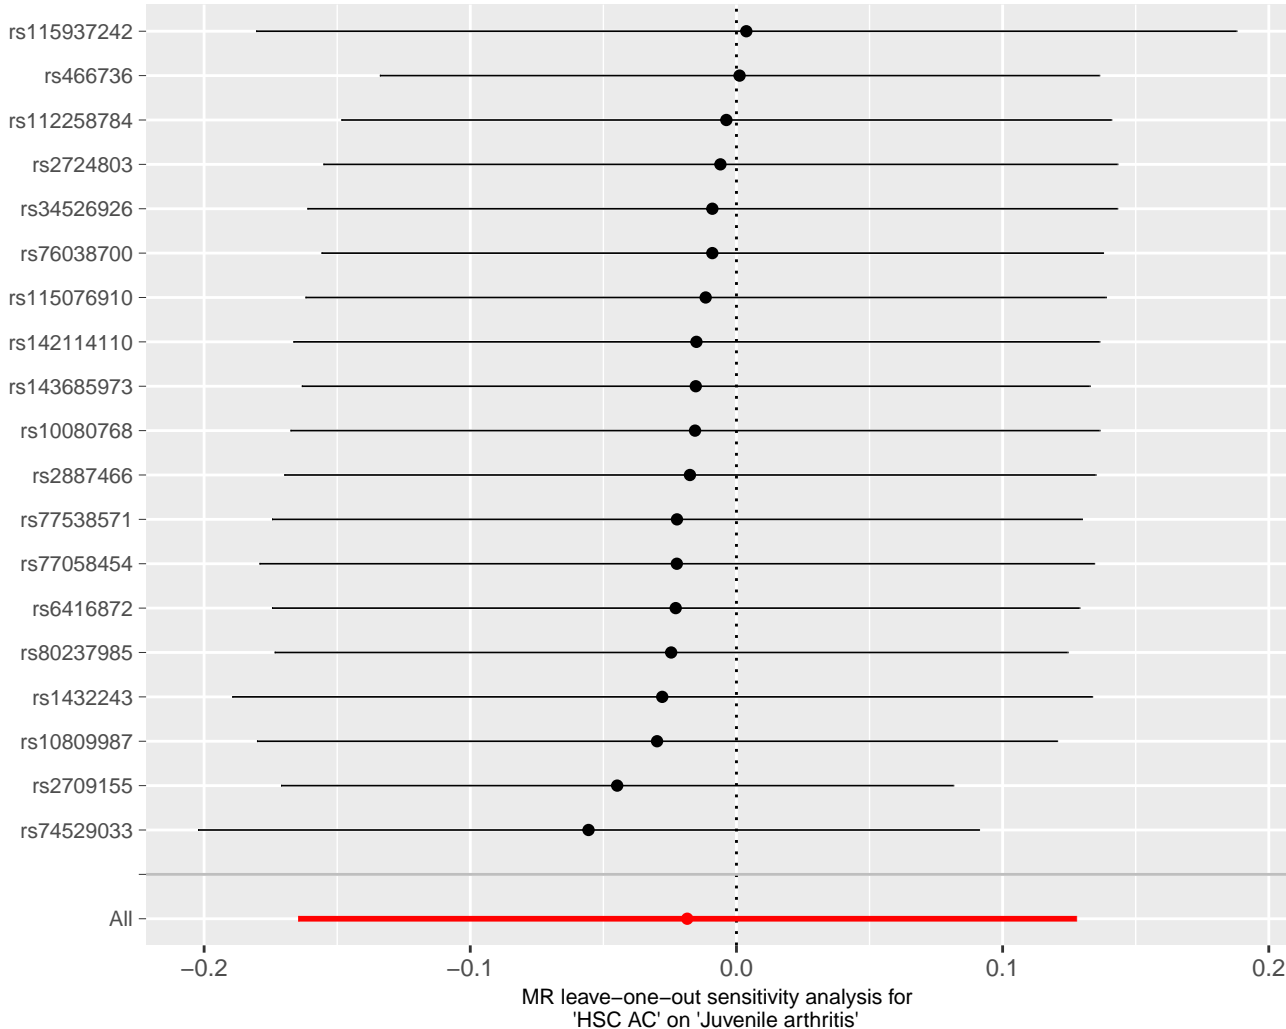

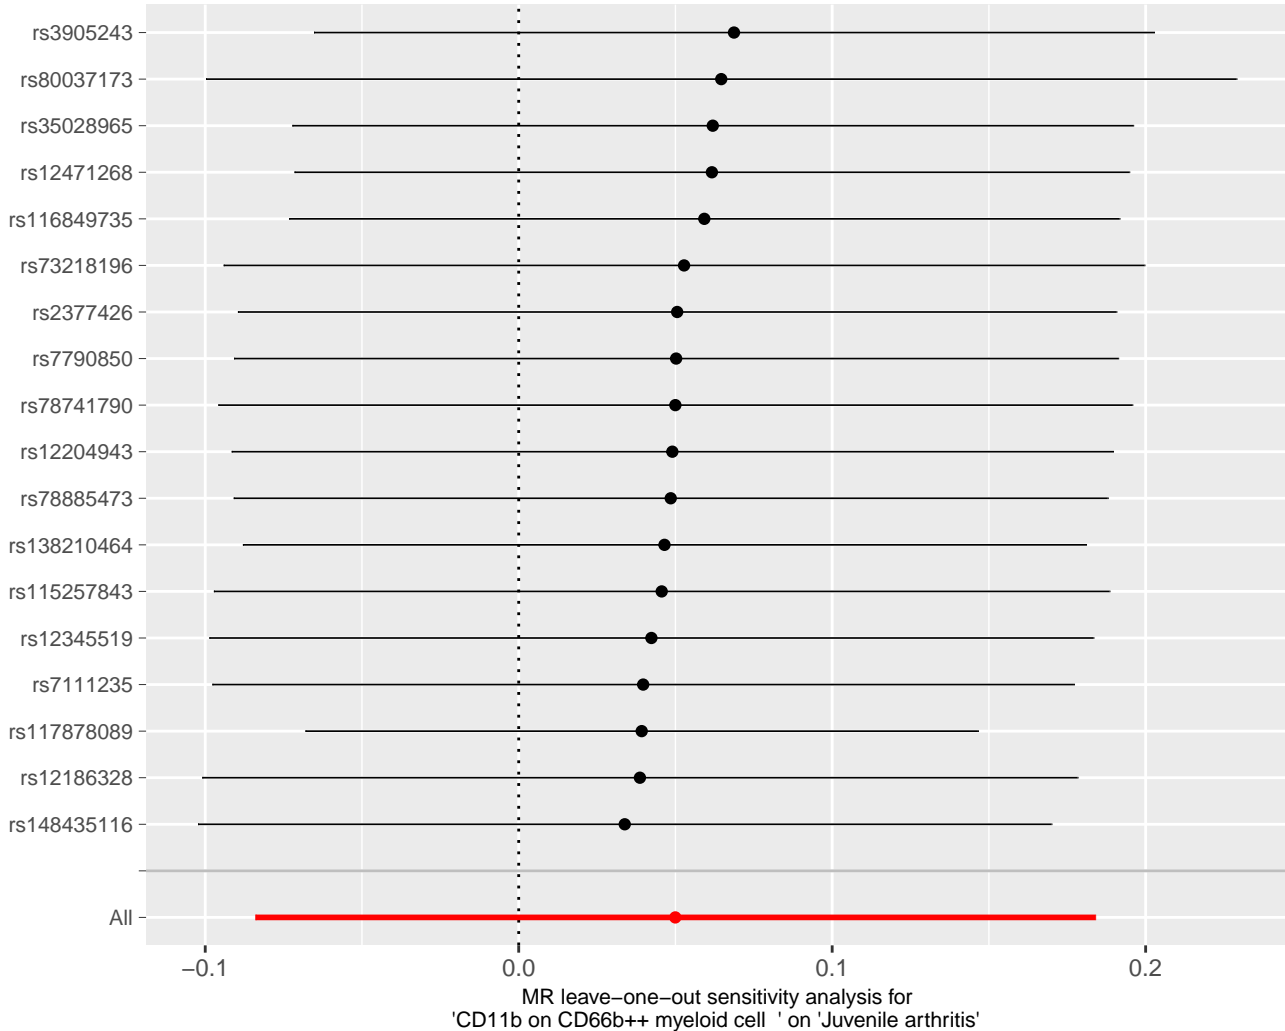

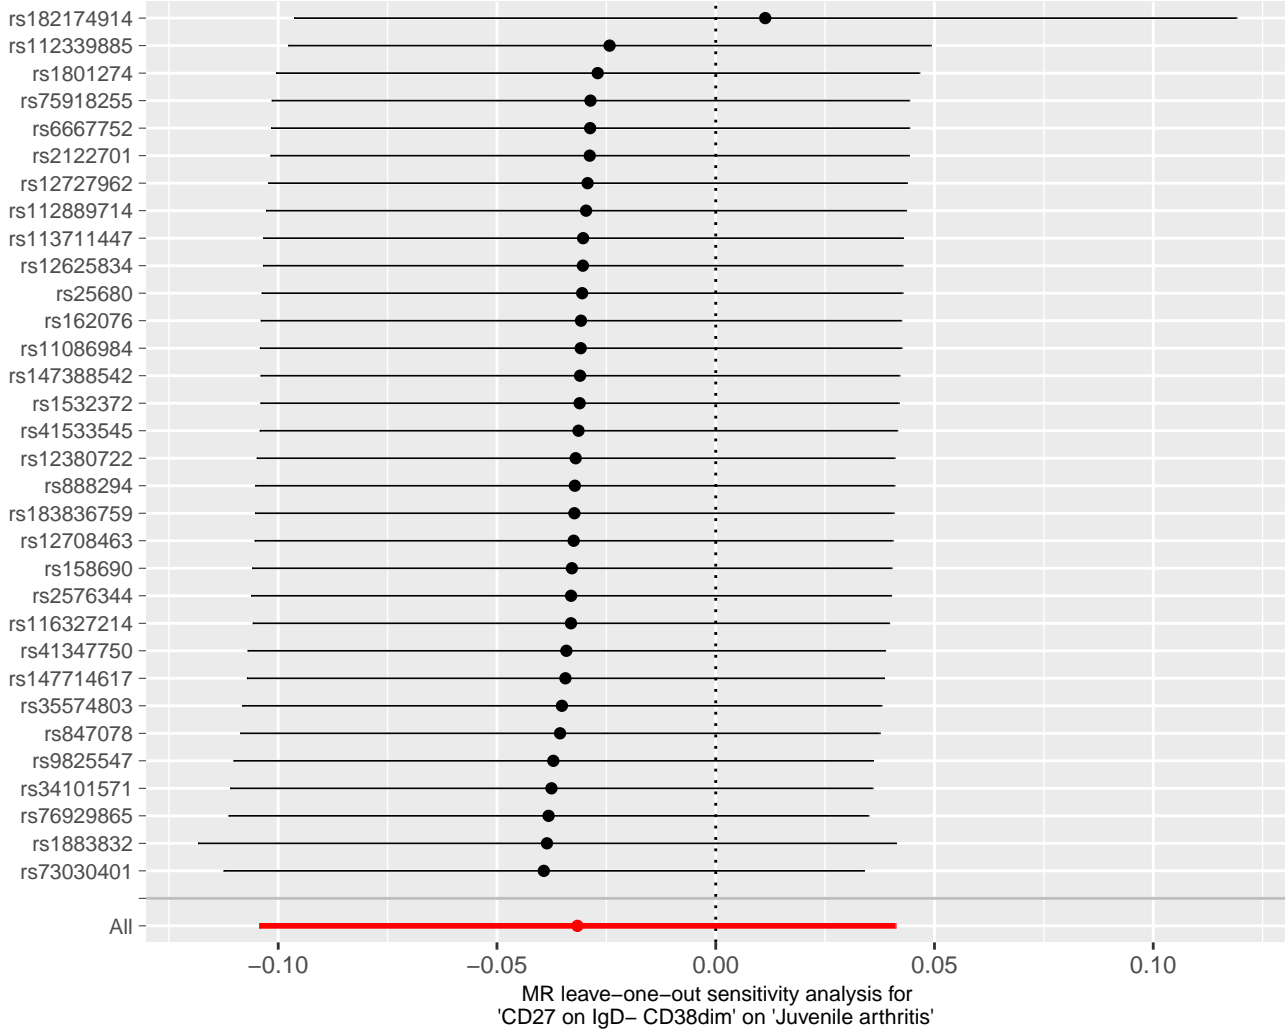

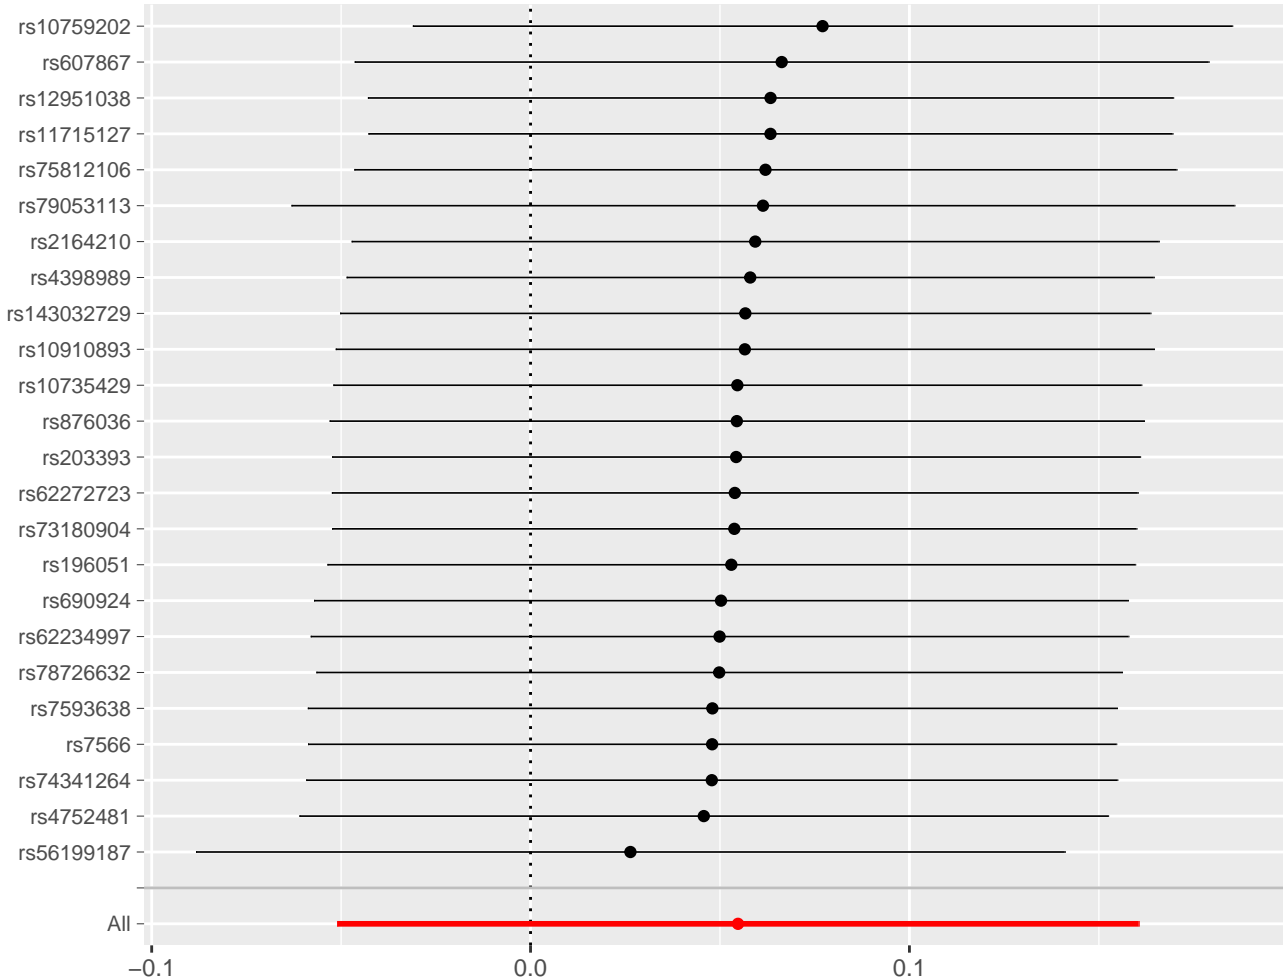

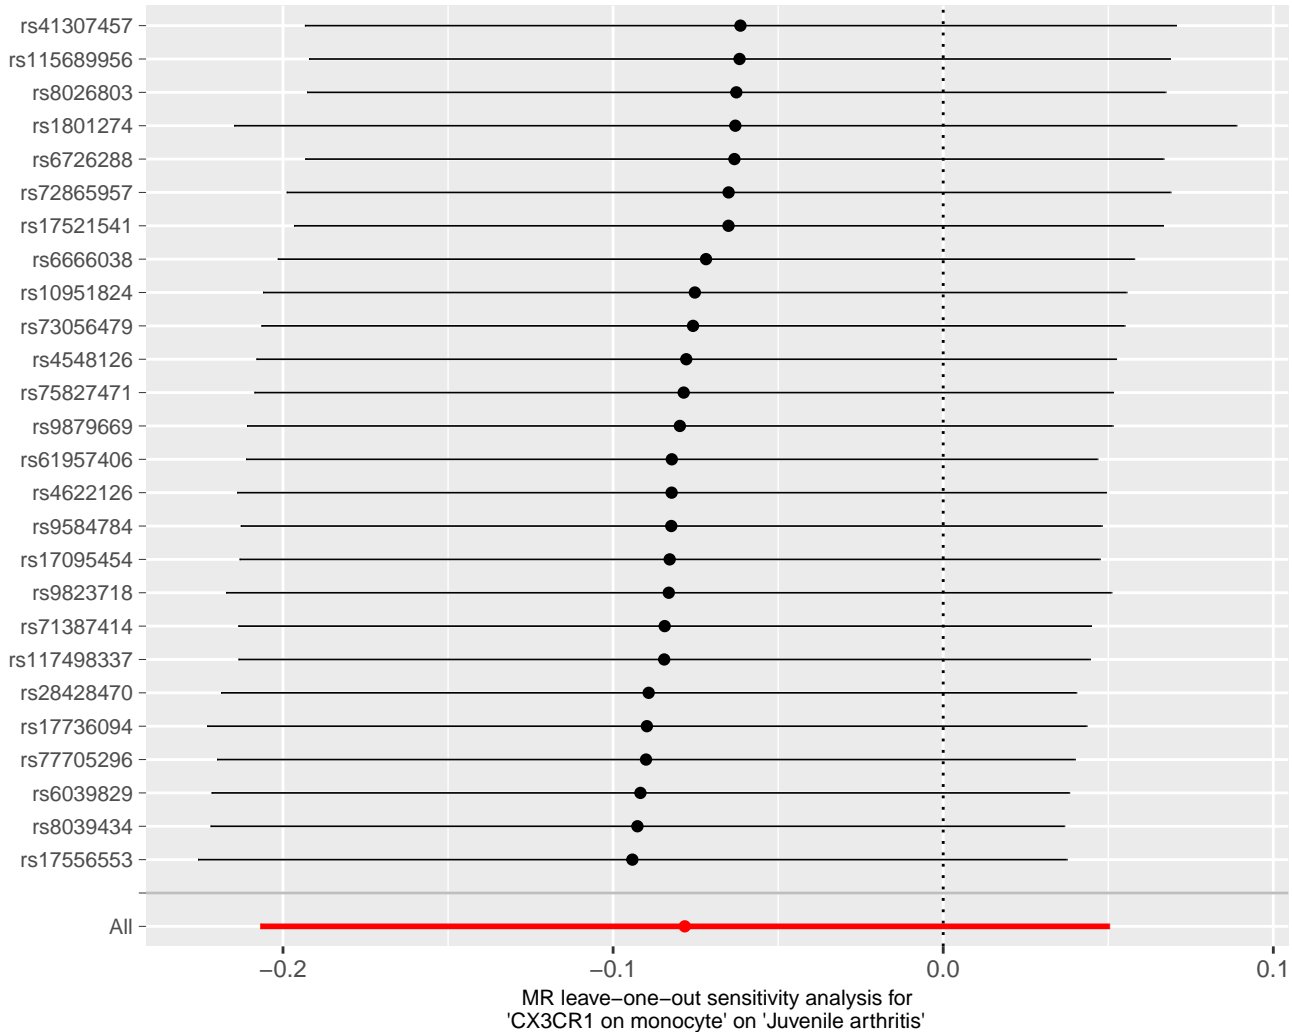



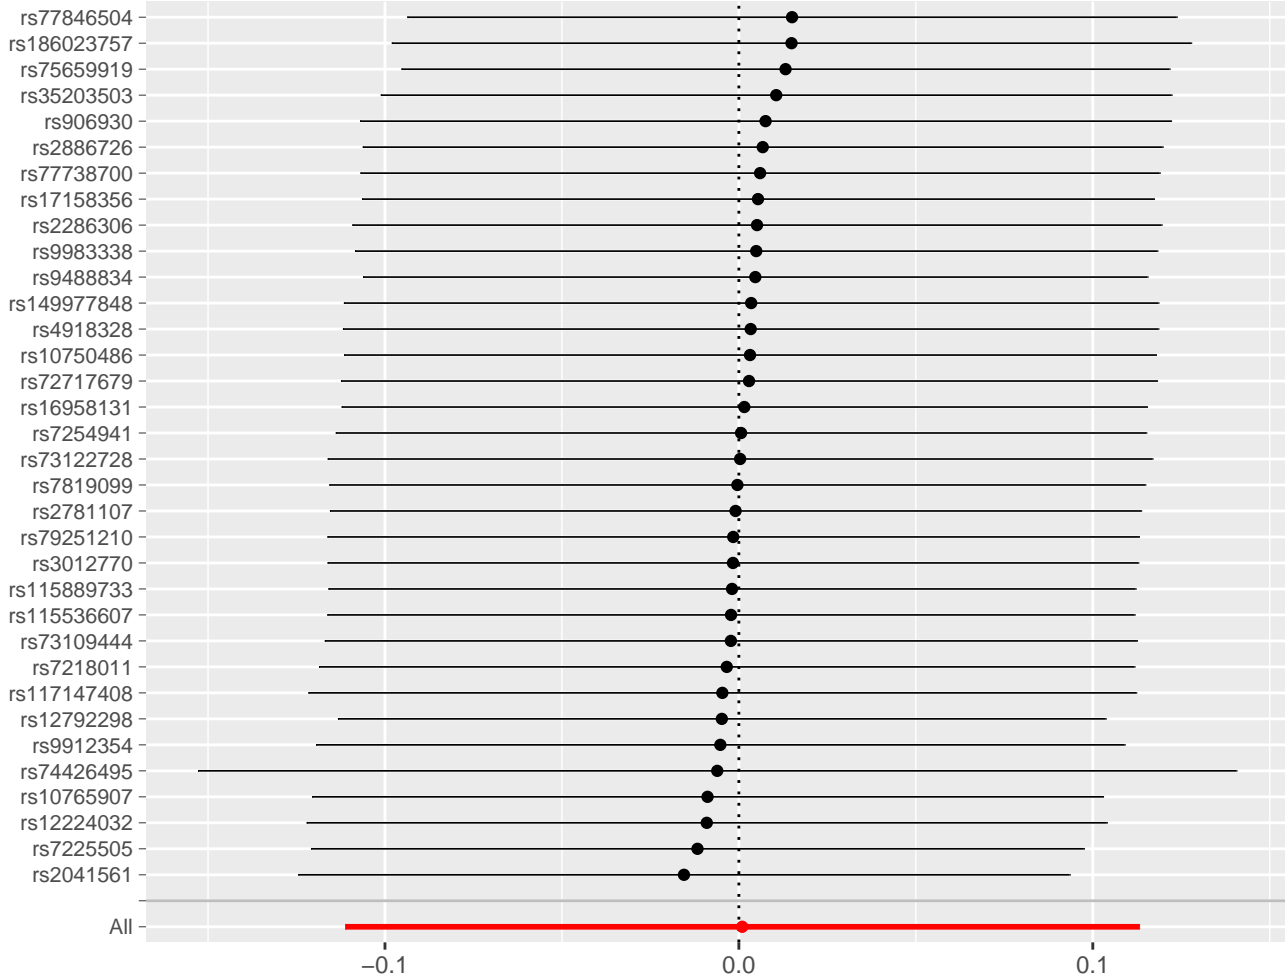

MR leave-one-out sensitivity analysis for 'NKT %lymphocyte' on 'Juvenile arthritis'

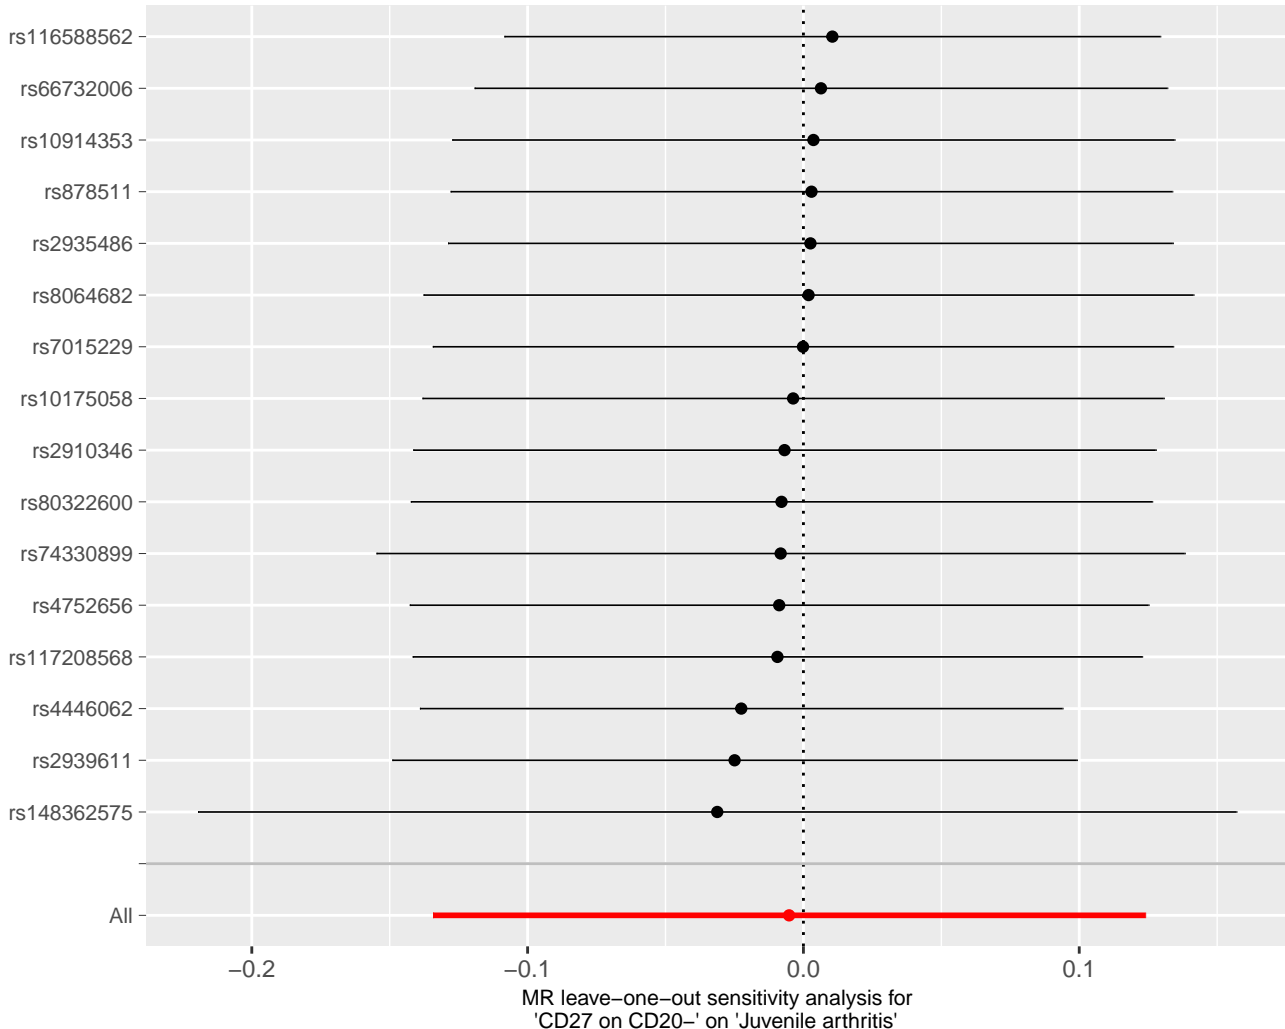

MR leave-one-out sensitivity analysis for 'CD27 on CD20-' on 'Juvenile arthritis'

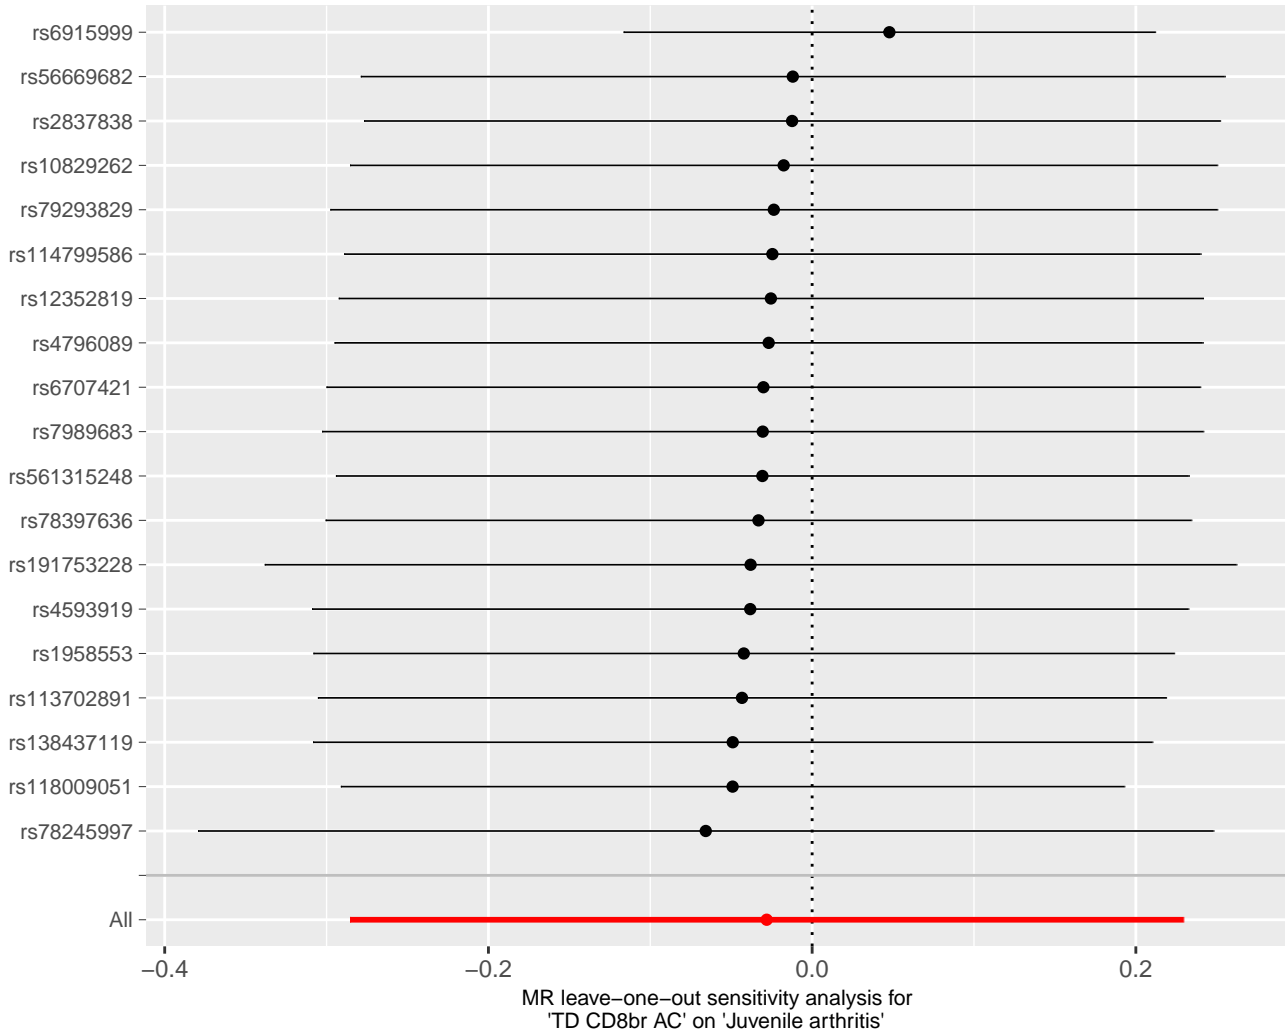

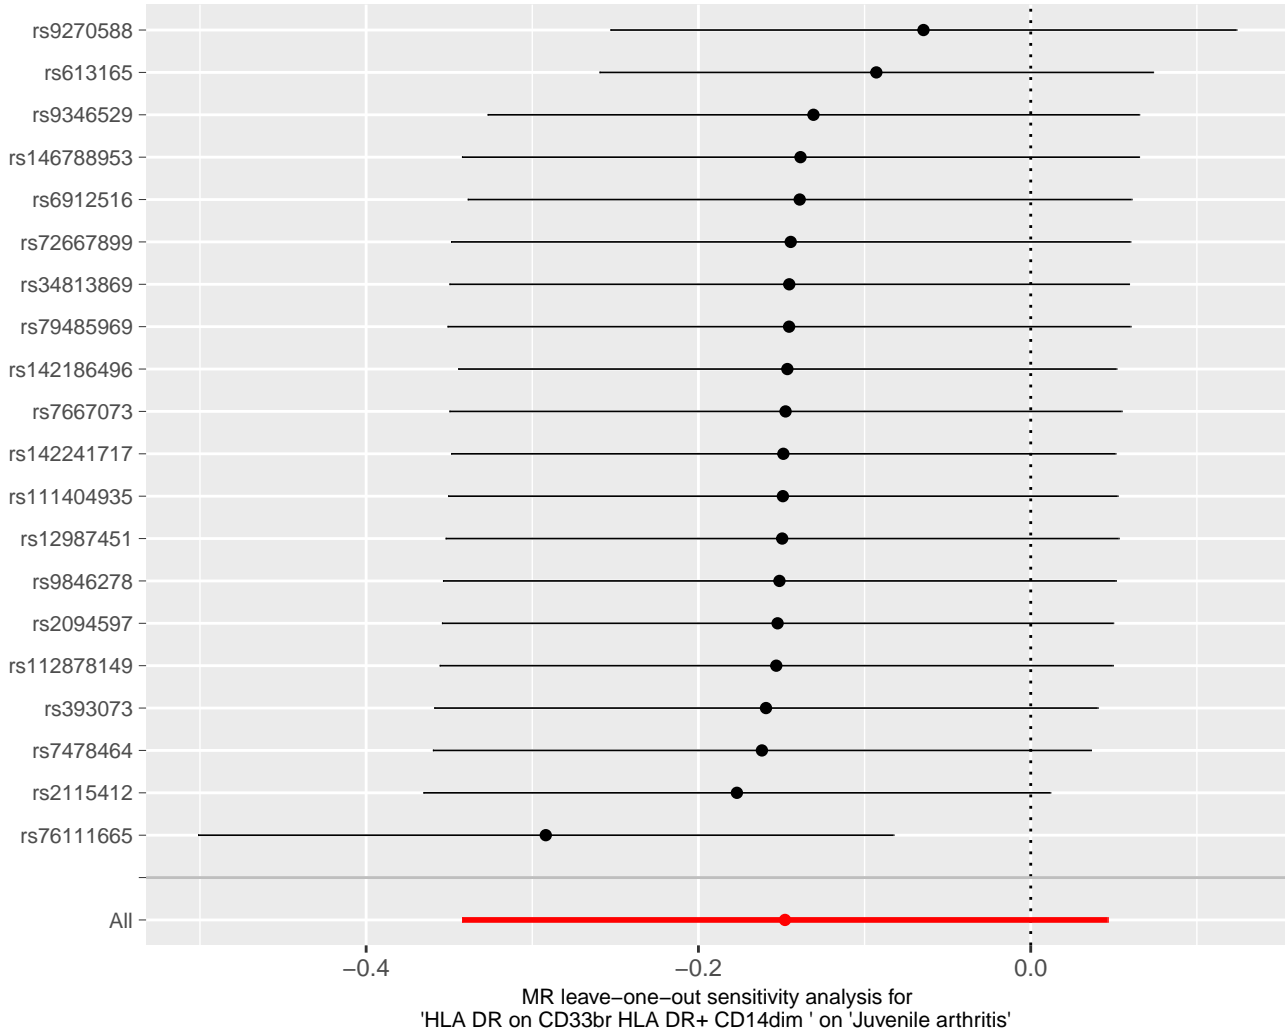

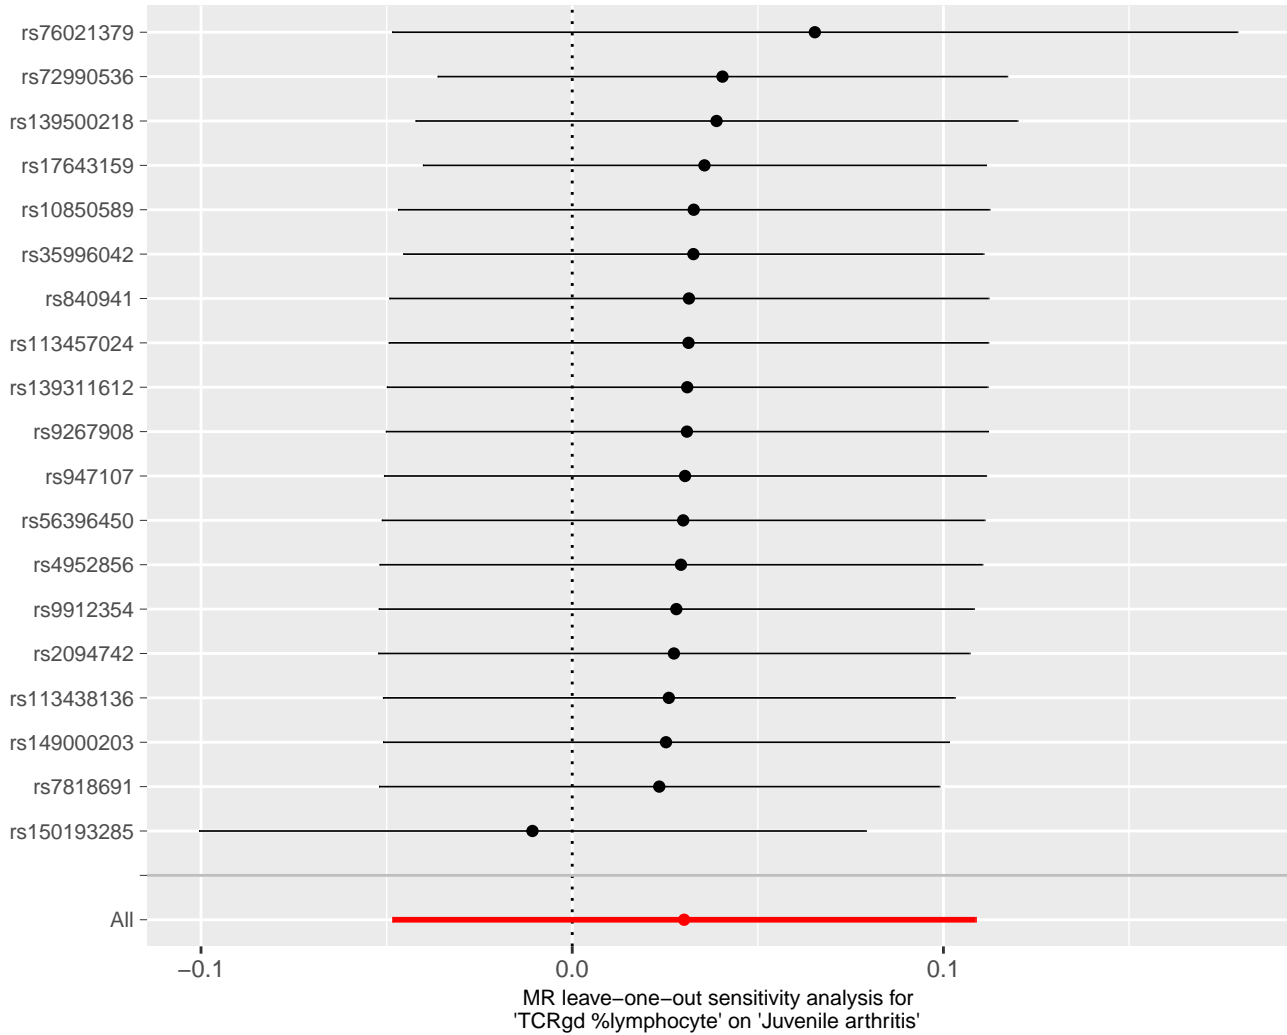

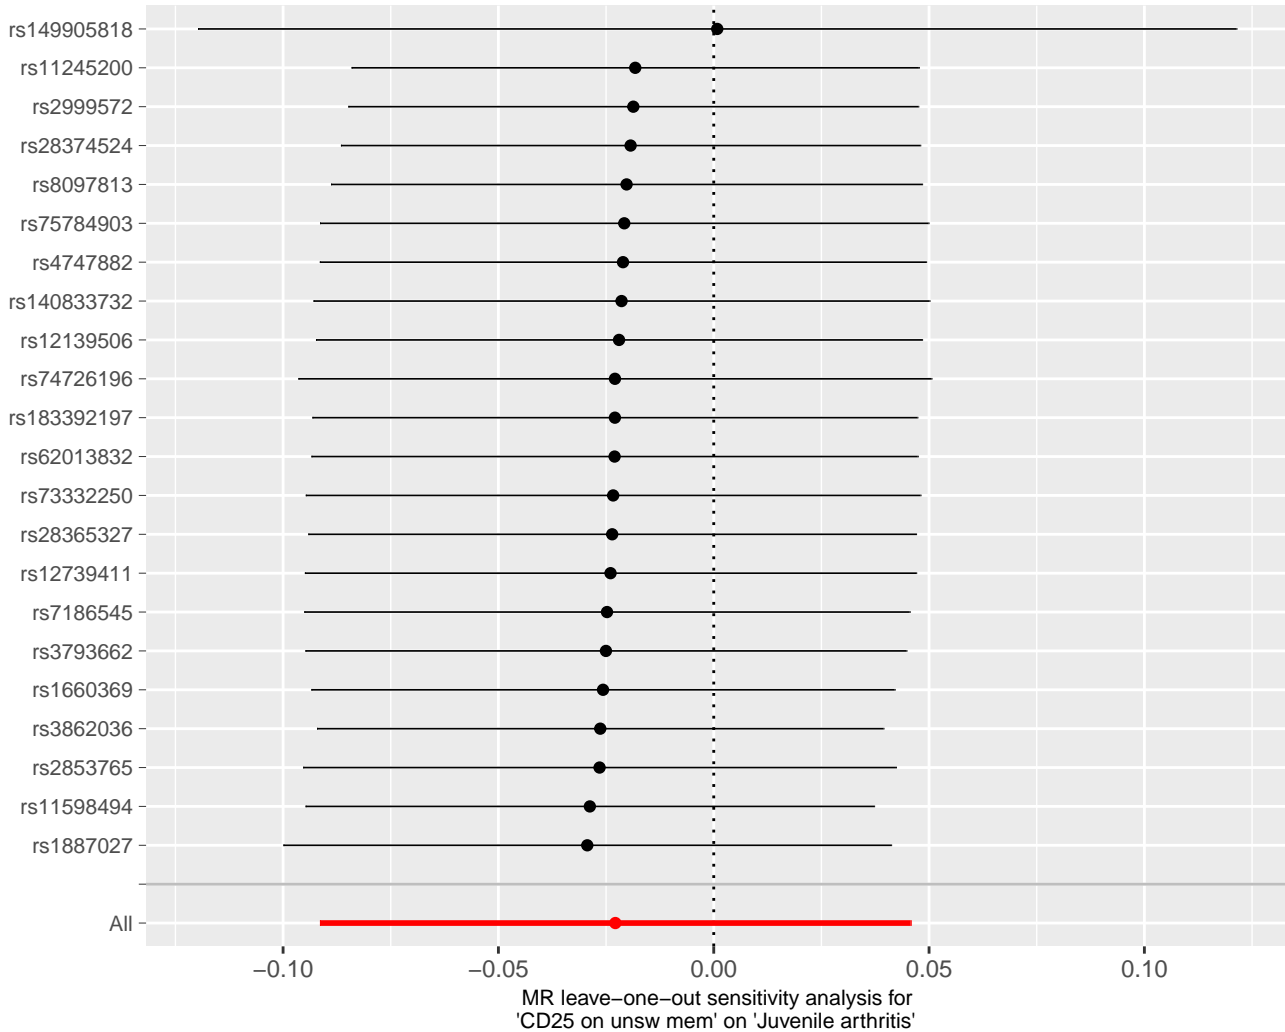

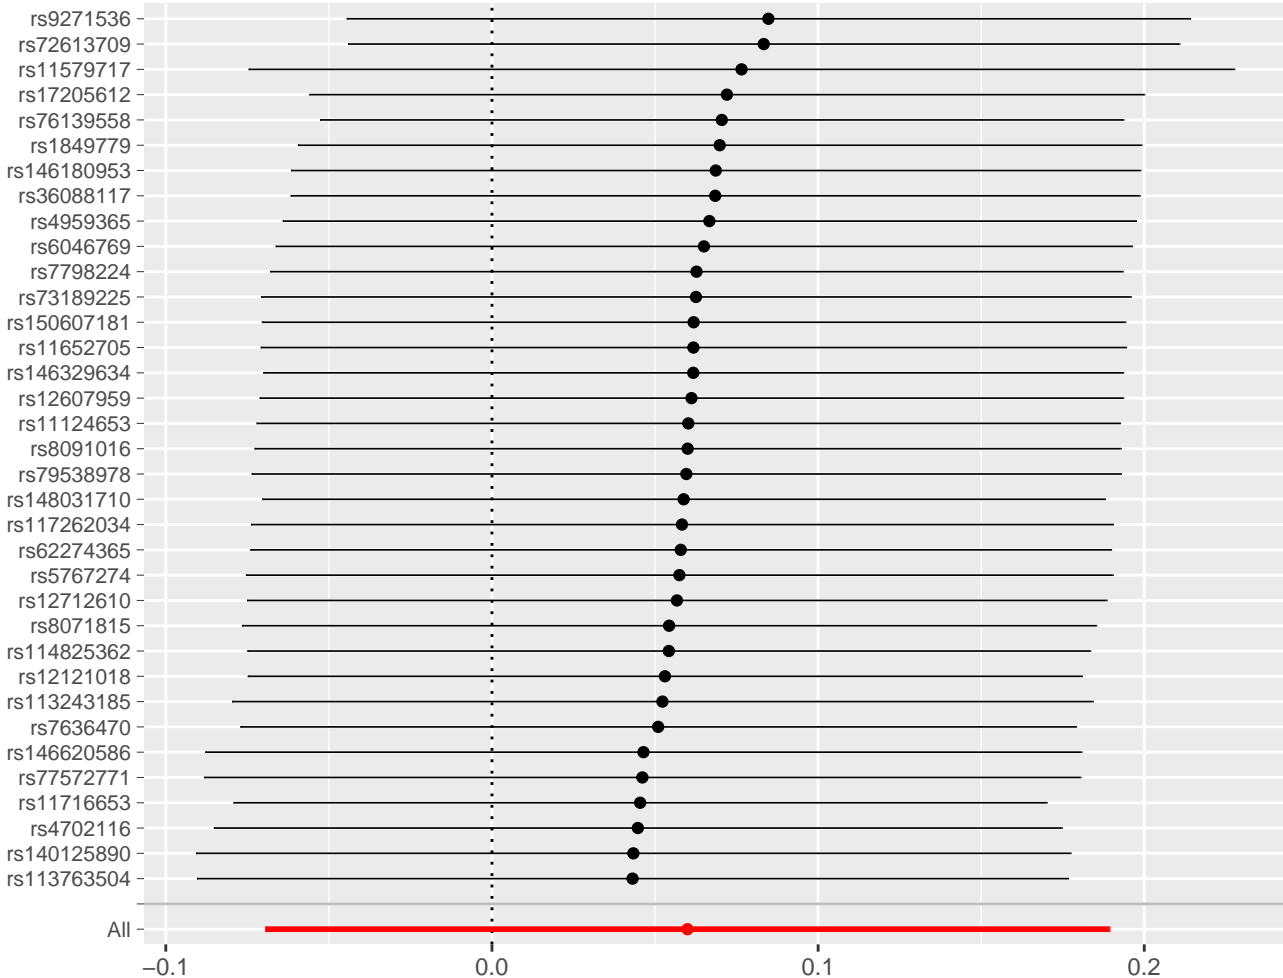

MR leave-one-out sensitivity analysis for 'Naive CD4+ %CD4+' on 'Juvenile arthritis'

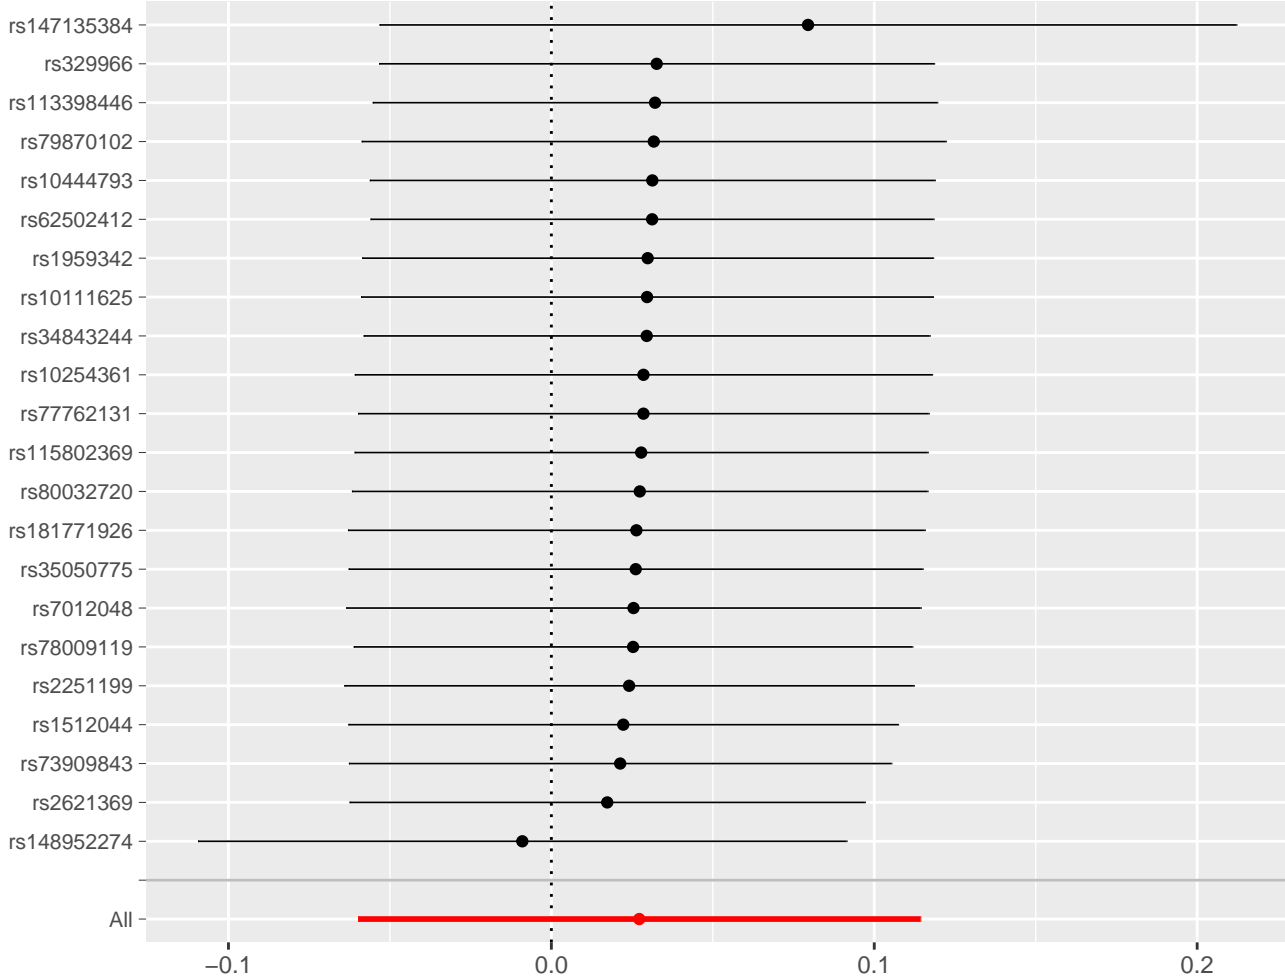



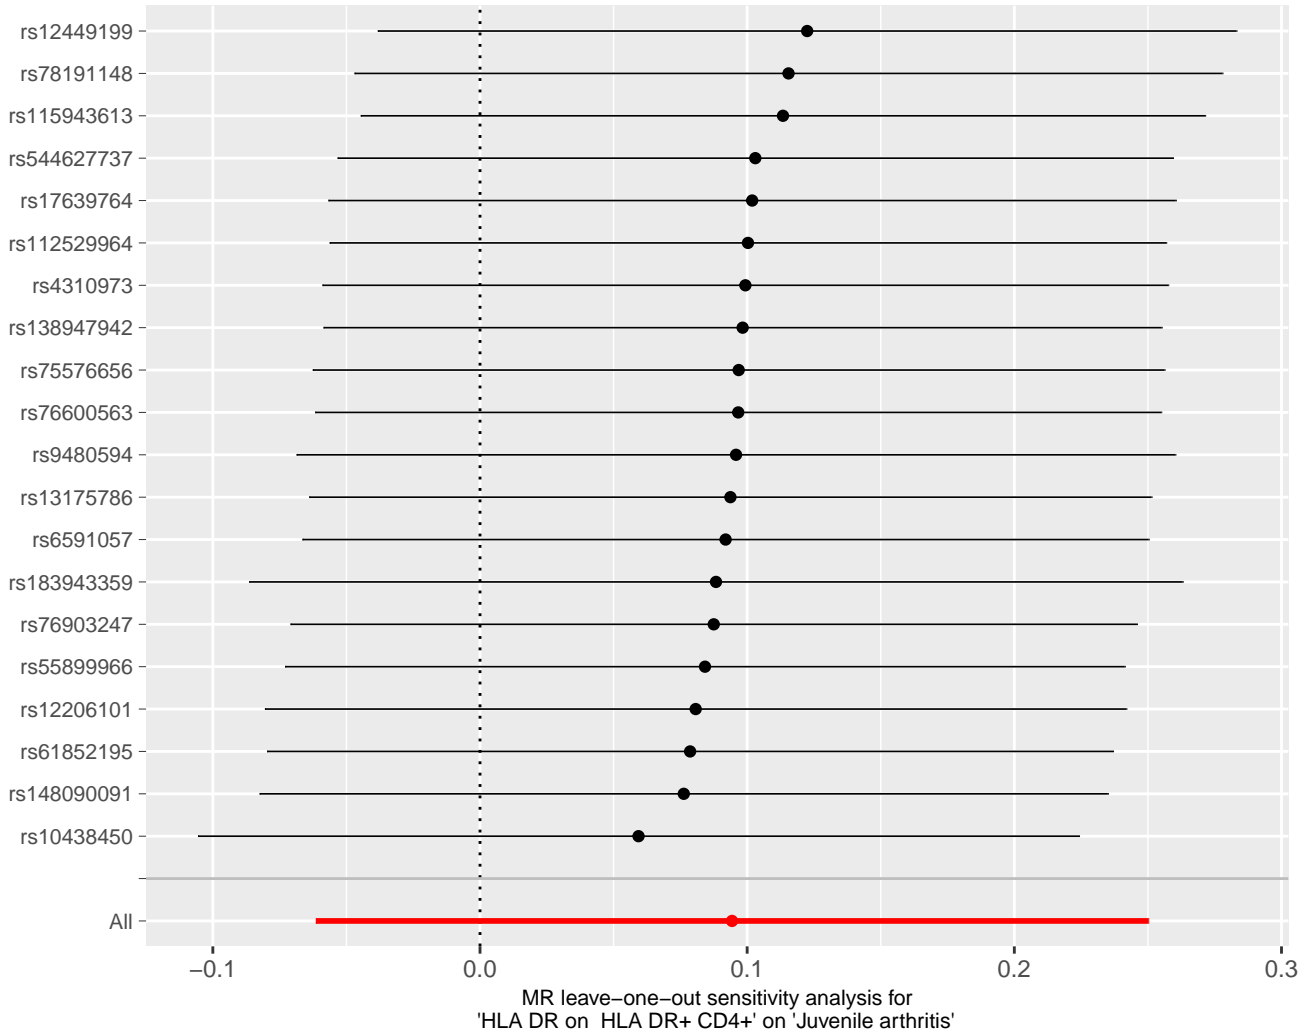

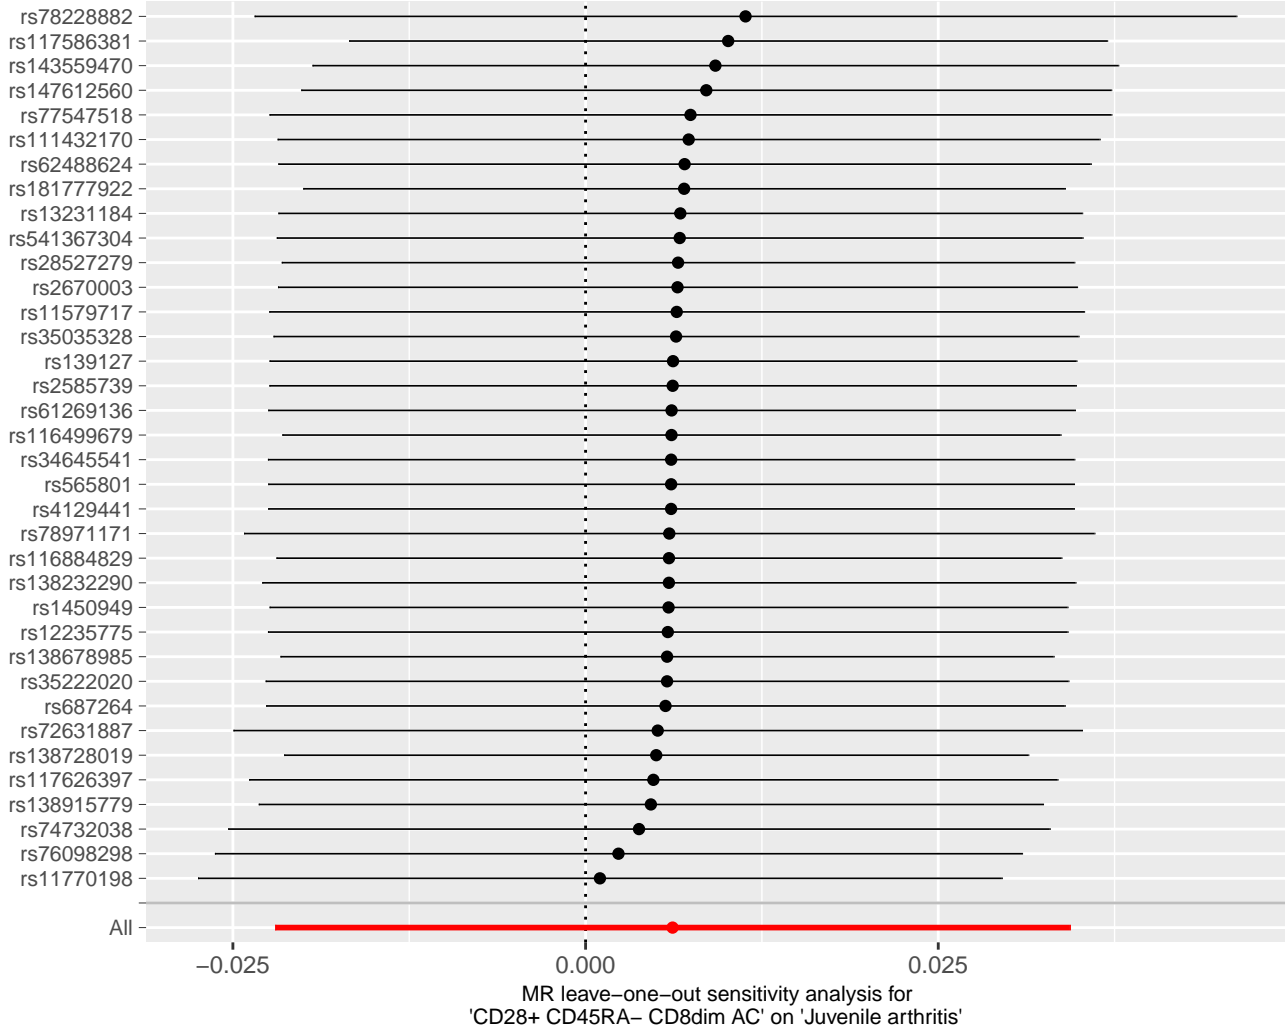

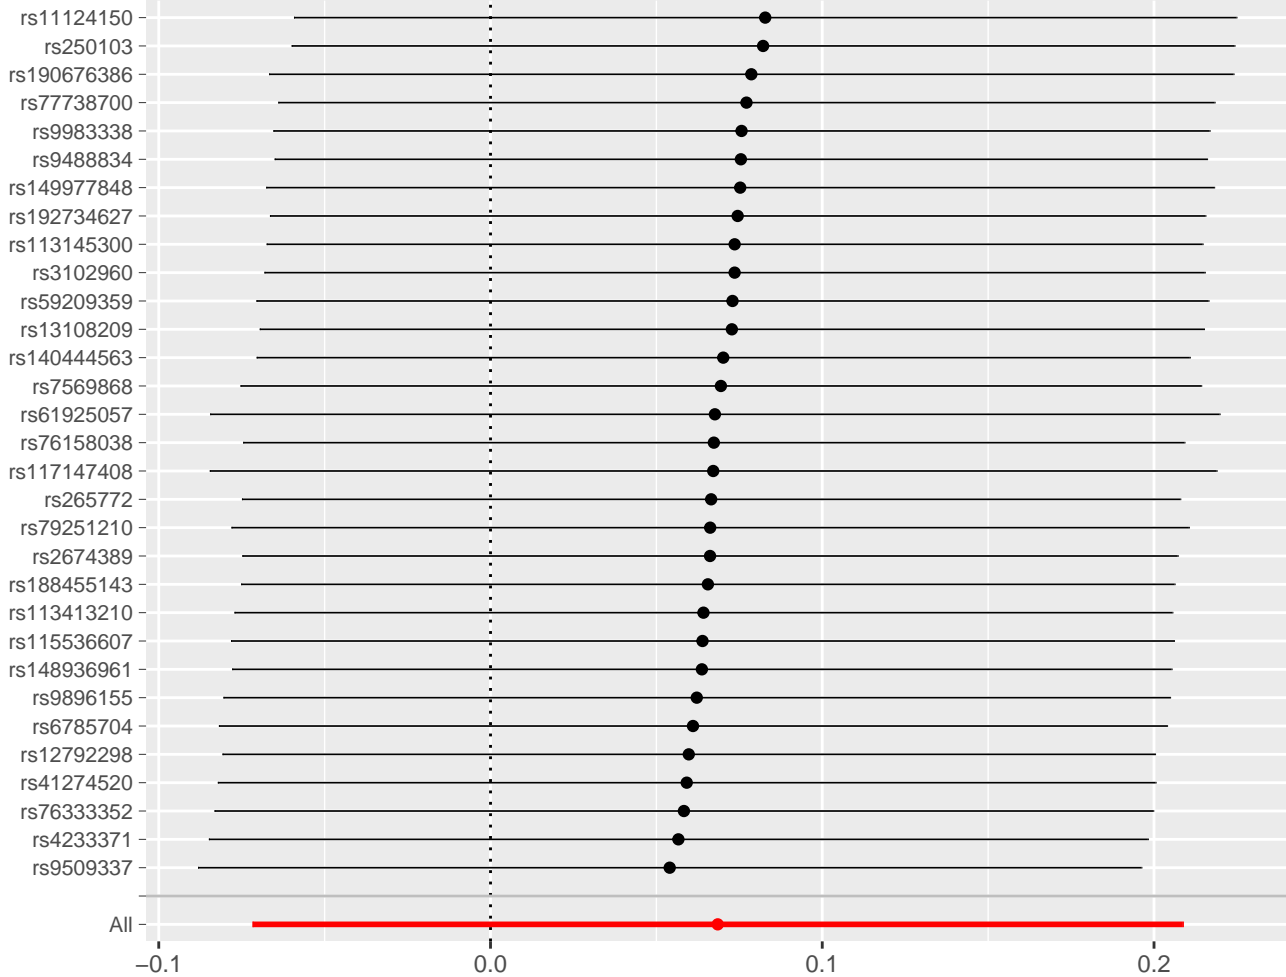

MR leave-one-out sensitivity analysis for 'DN (CD4-CD8-) NKT %T cell' on 'Juvenile arthritis'

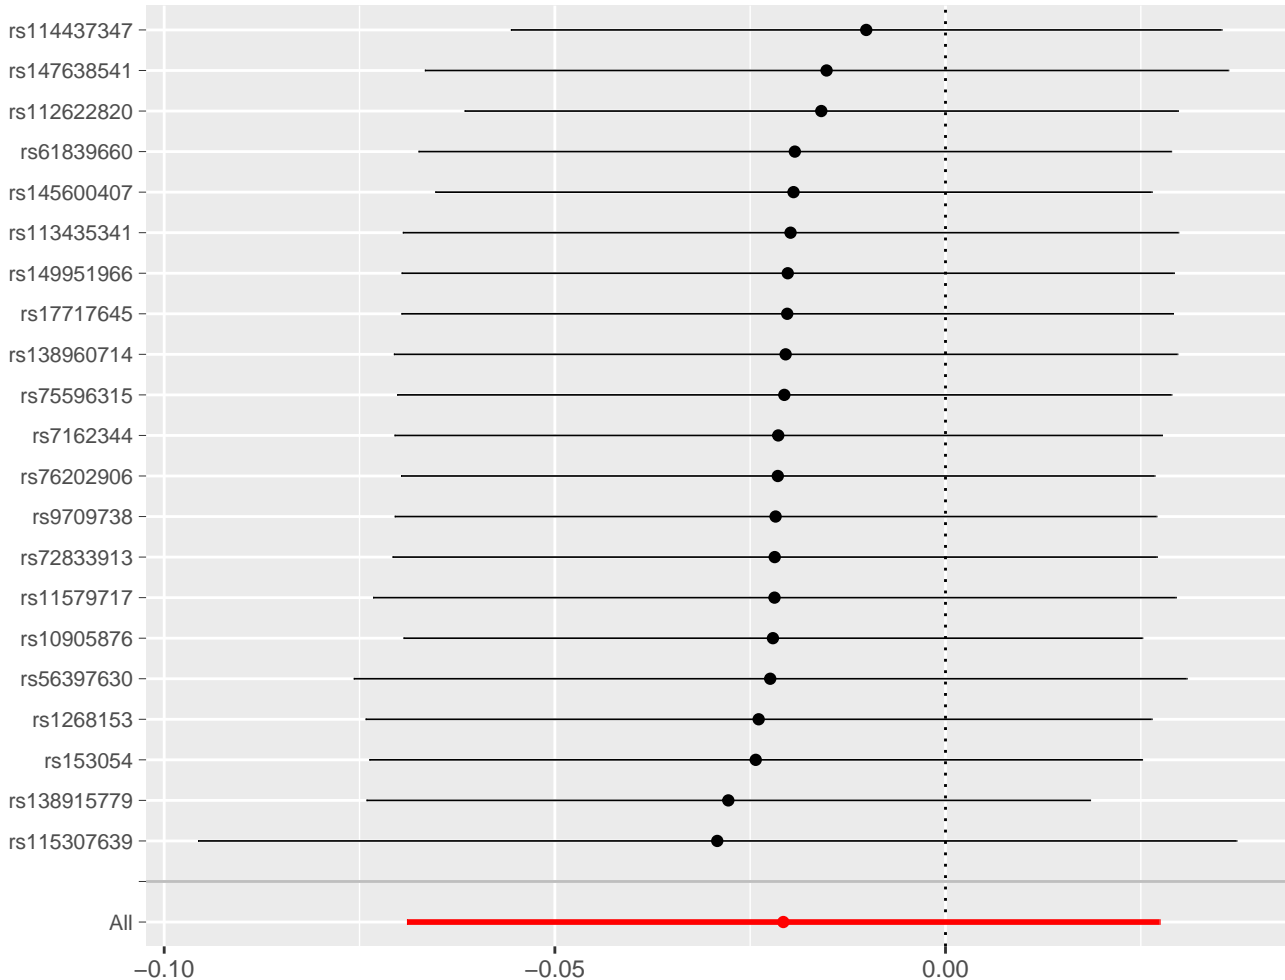

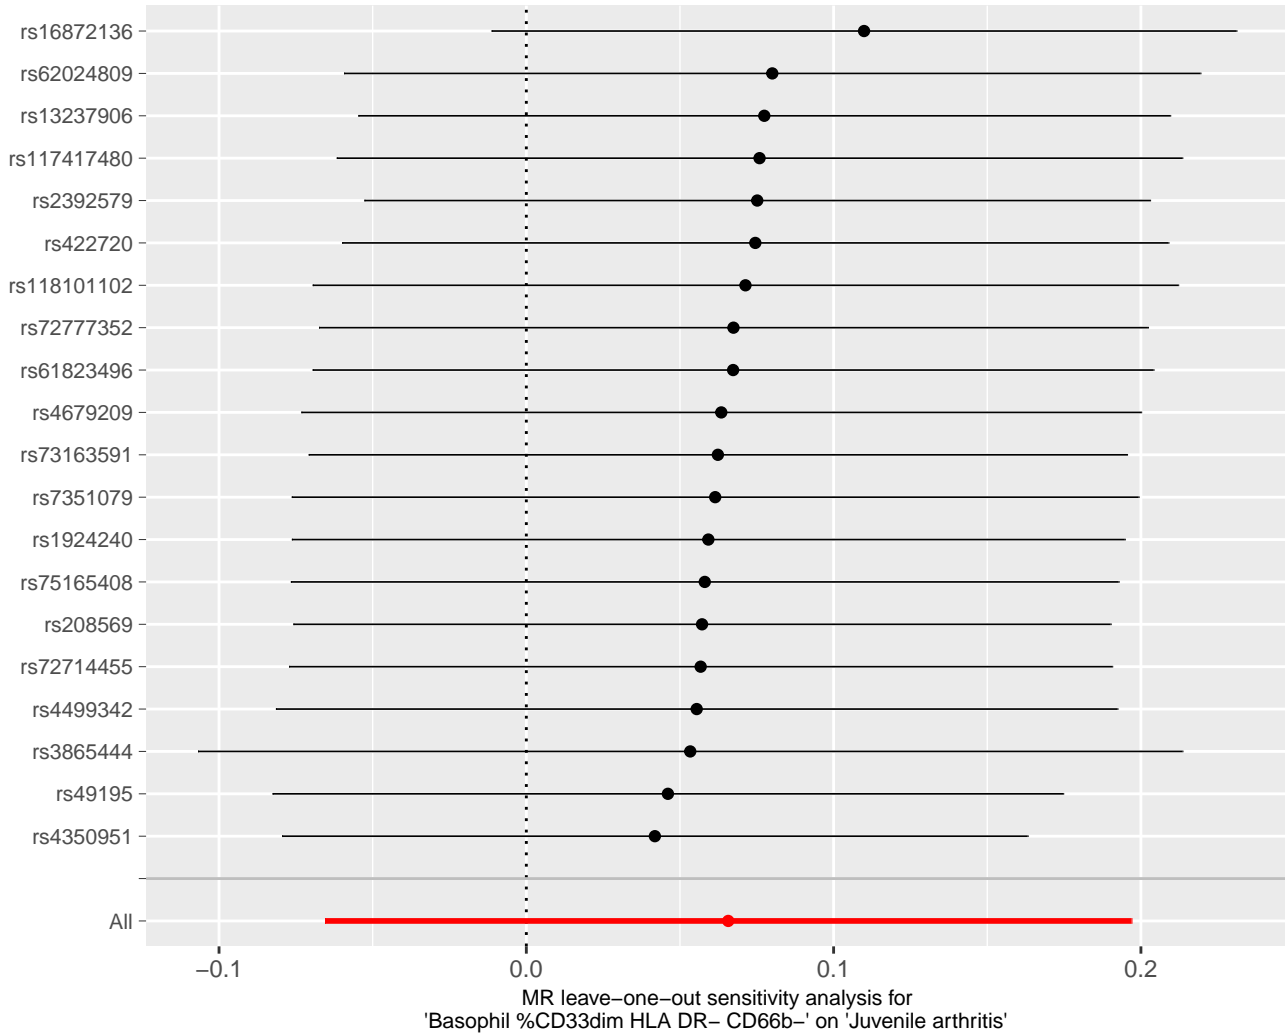

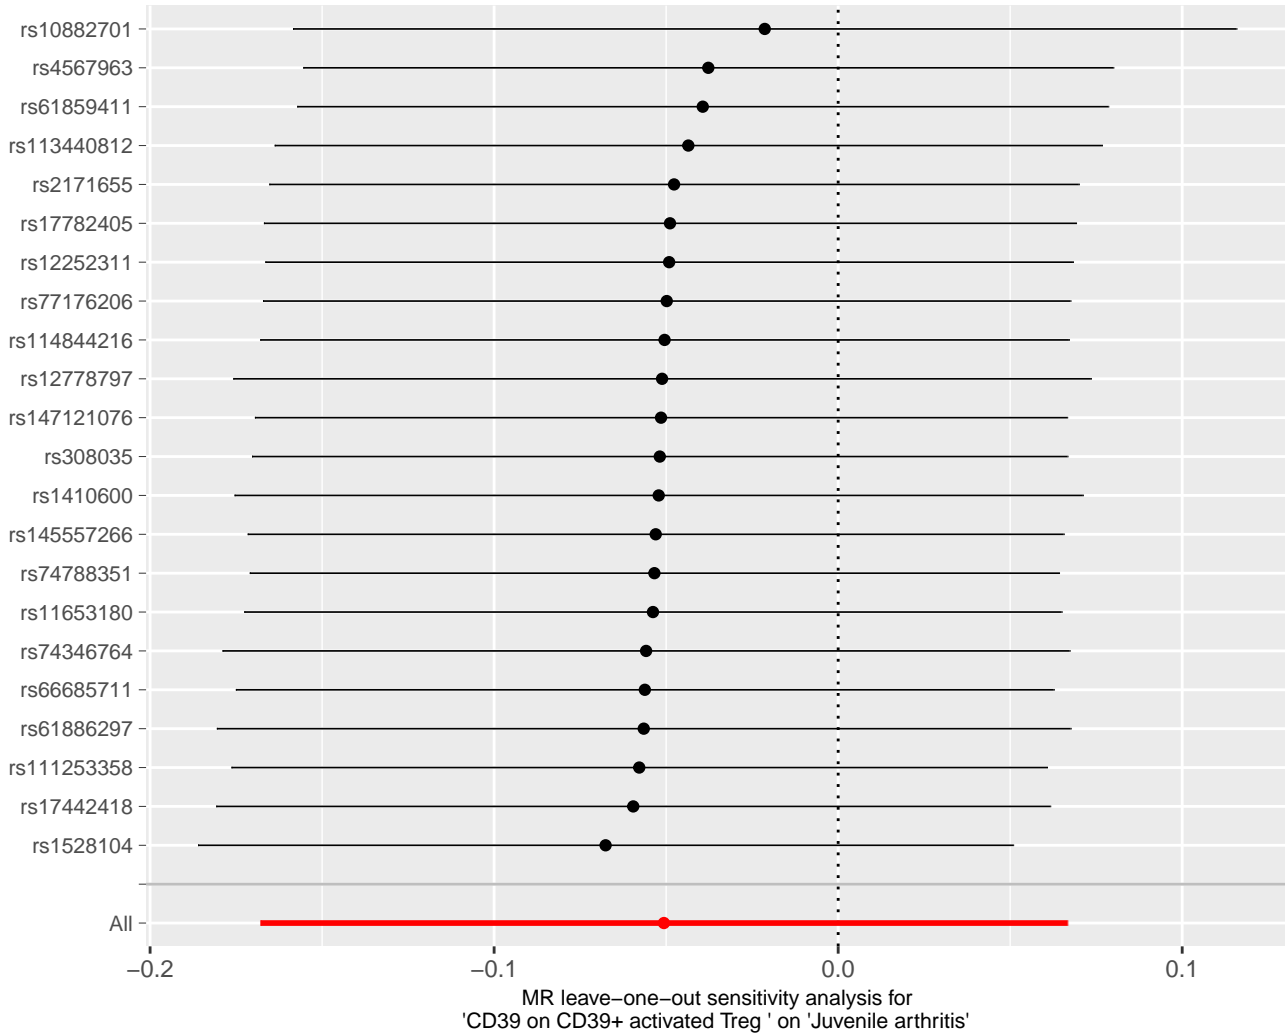

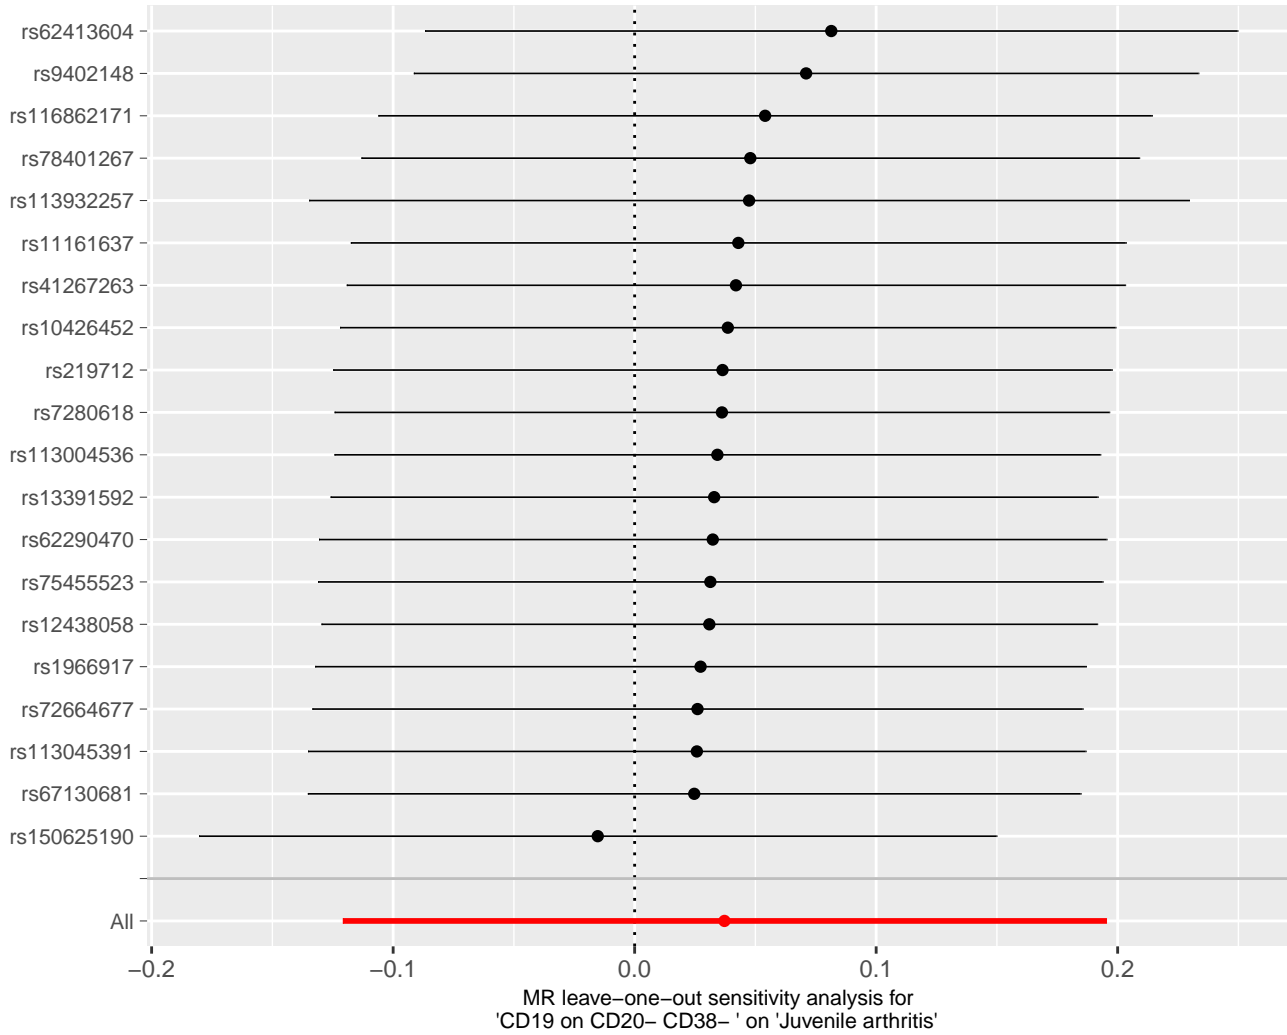

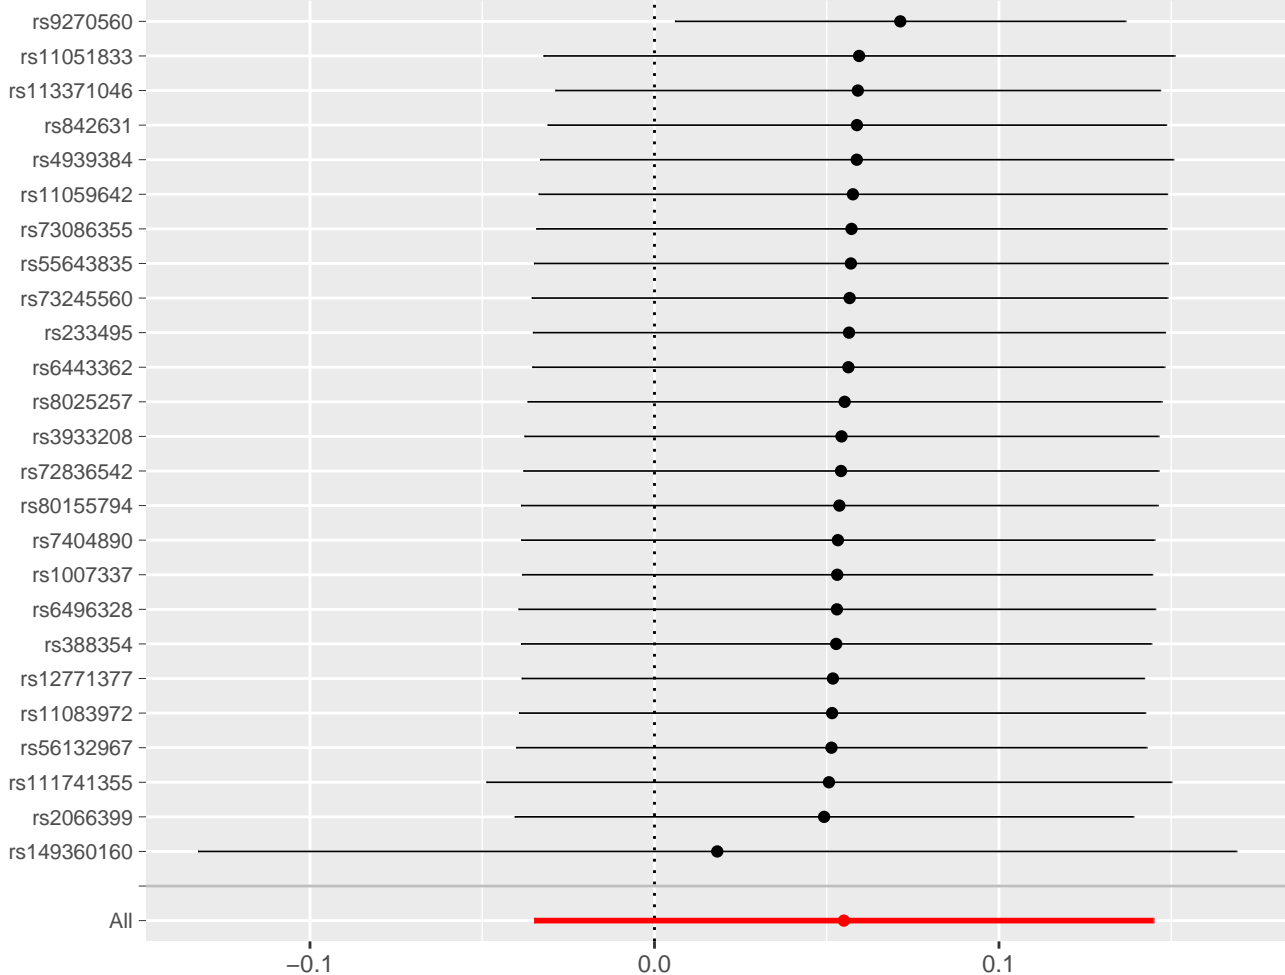

MR leave-one-out sensitivity analysis for 'CD20 on IgD+ CD24-' on 'Juvenile arthritis'



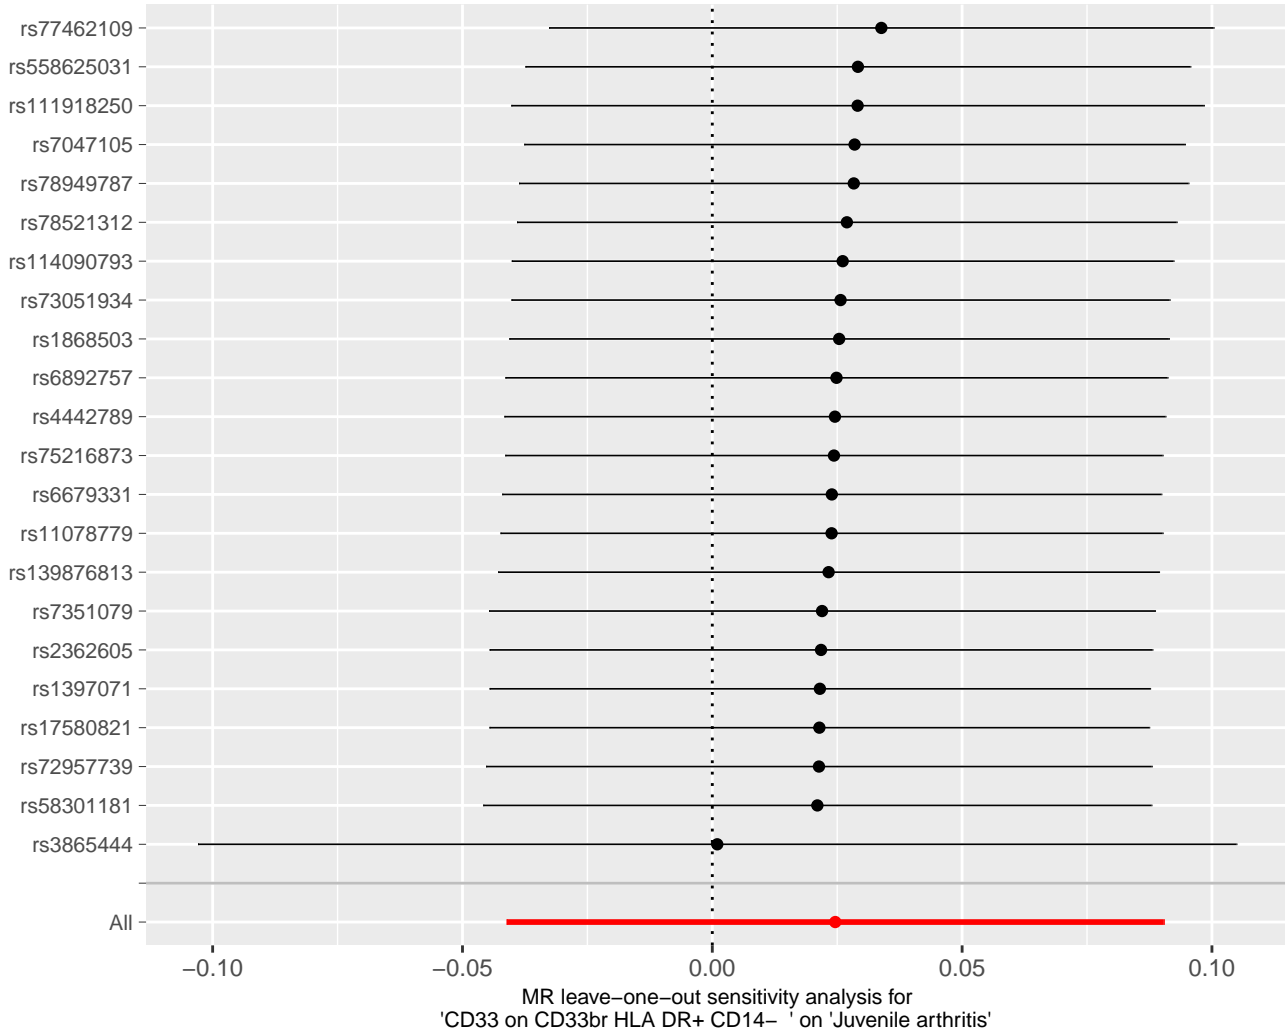

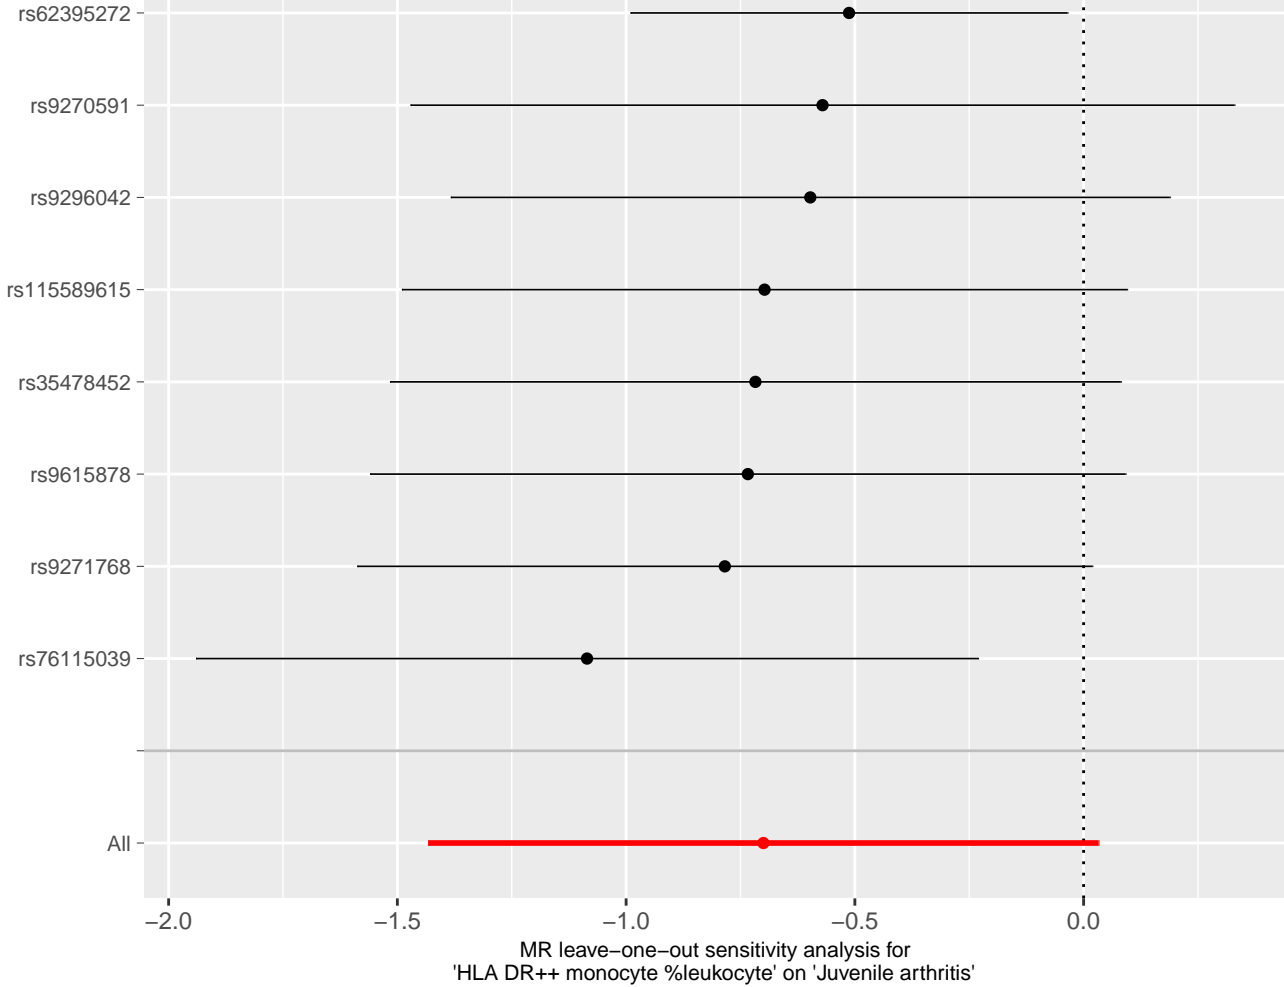

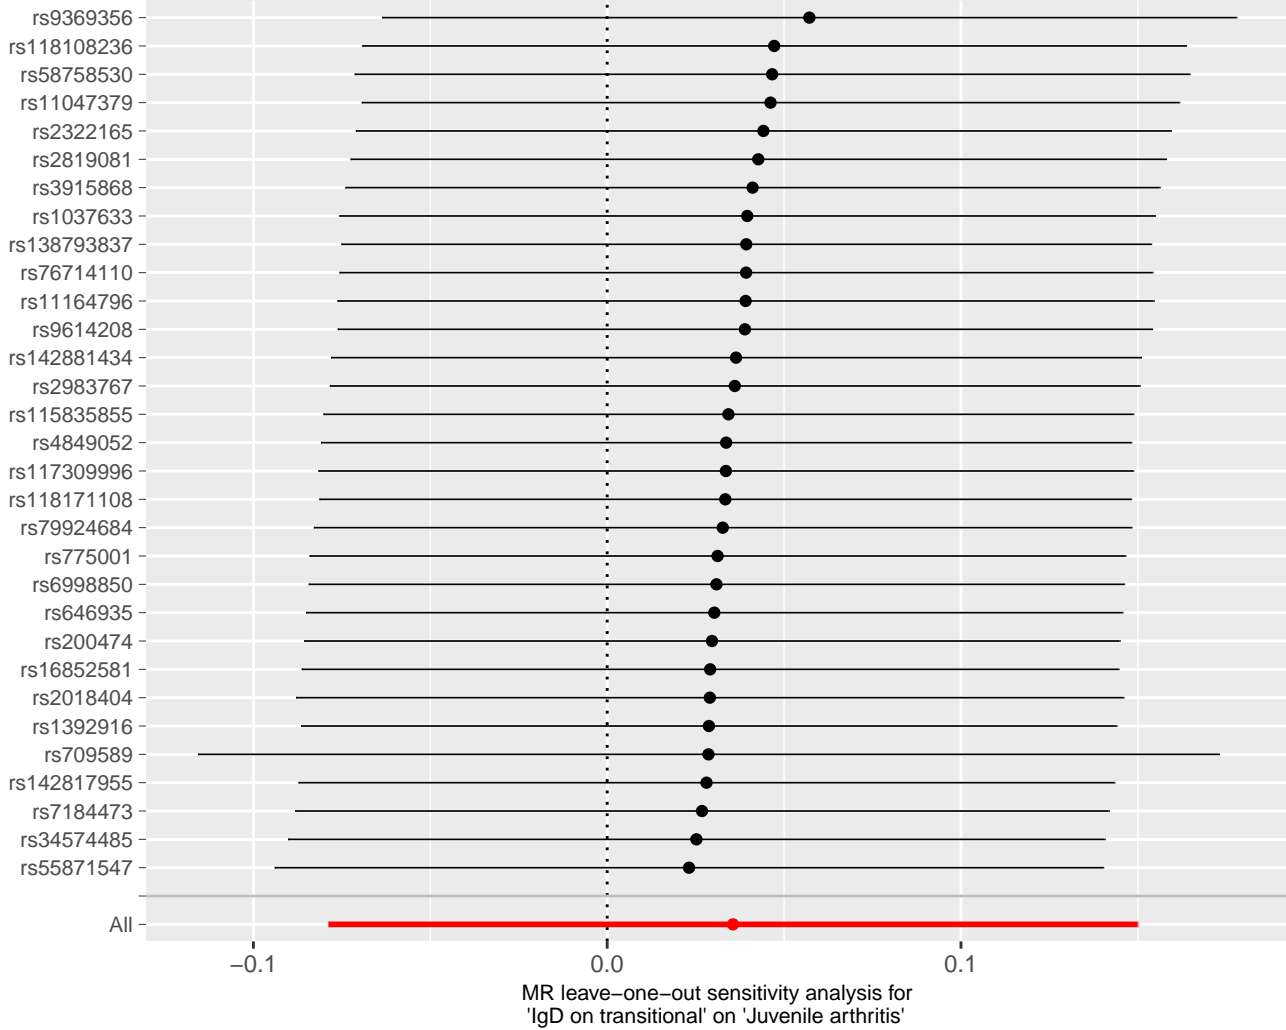

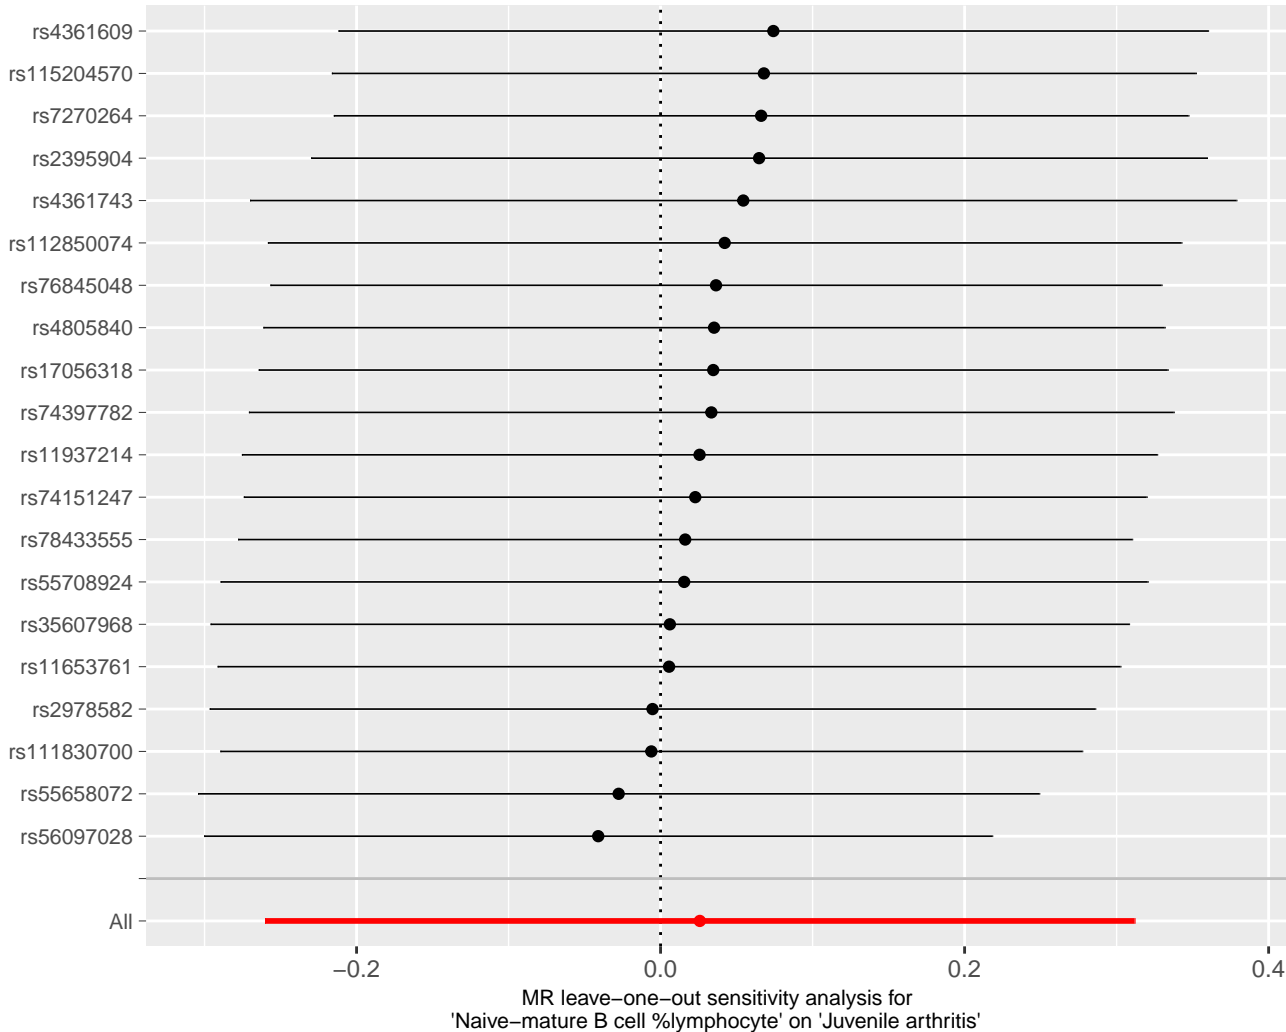

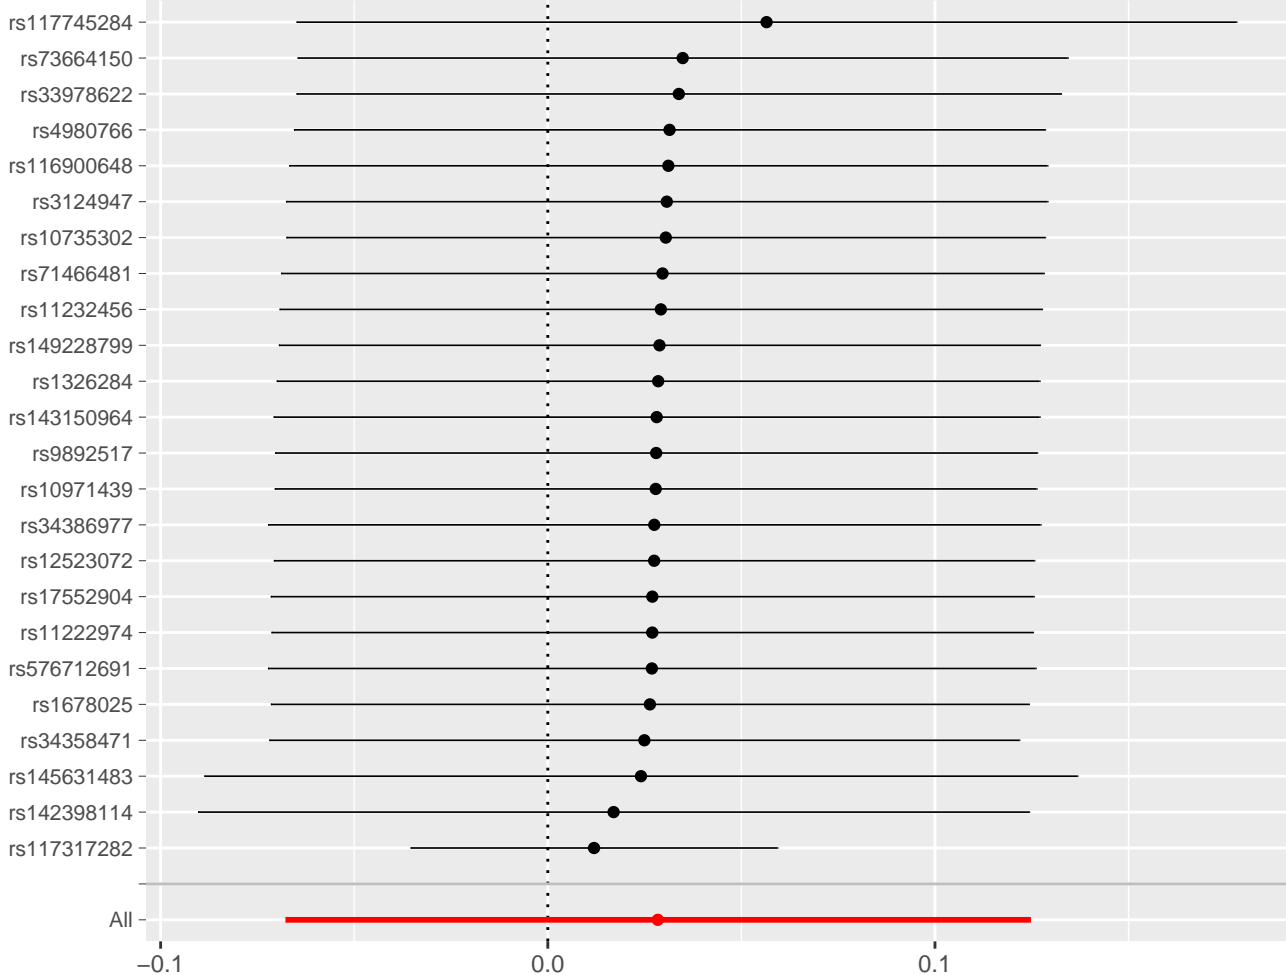

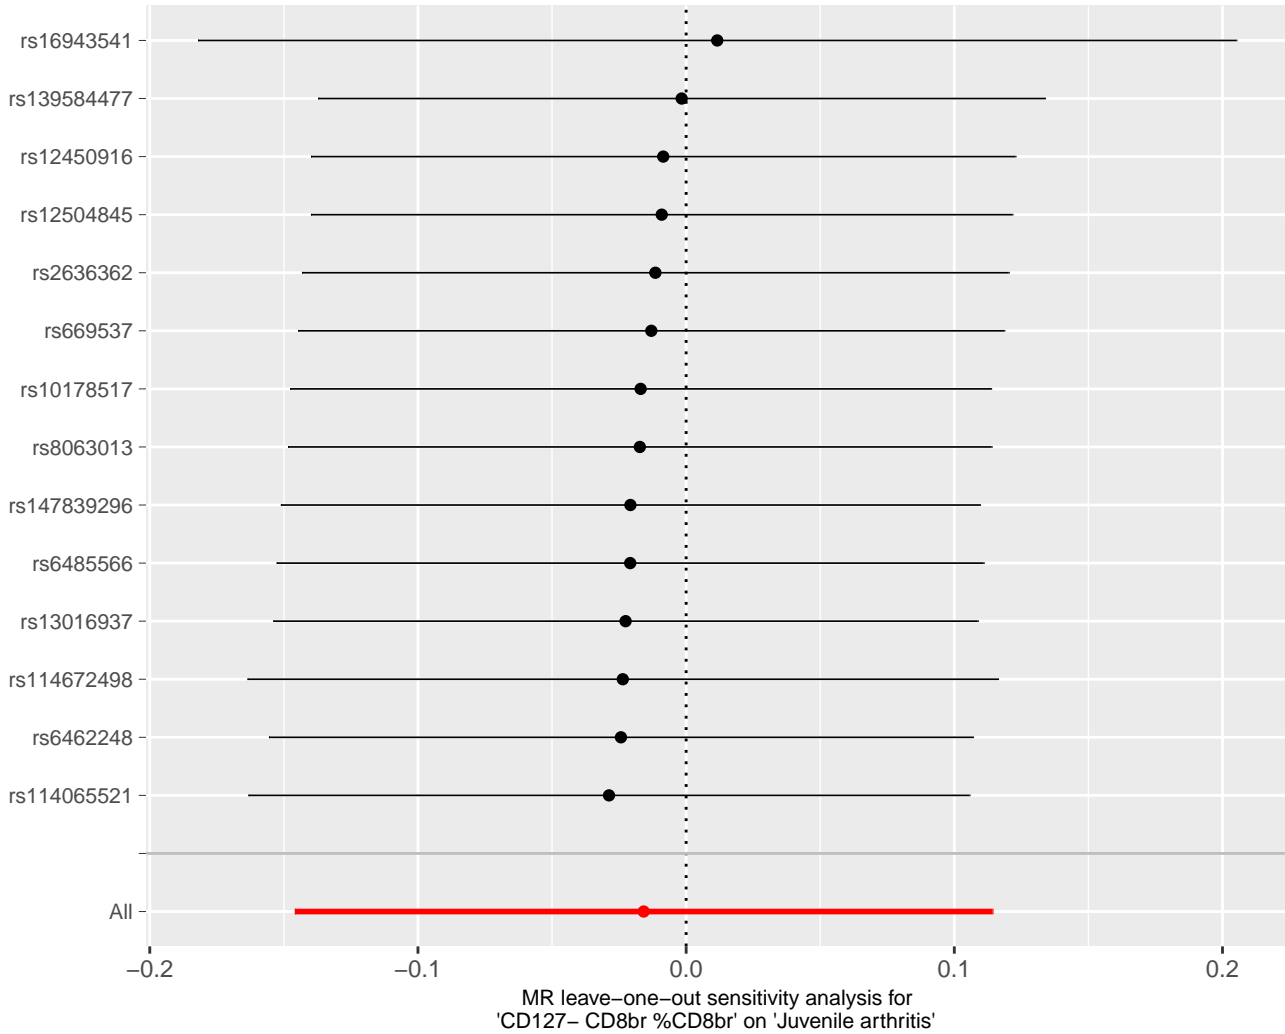

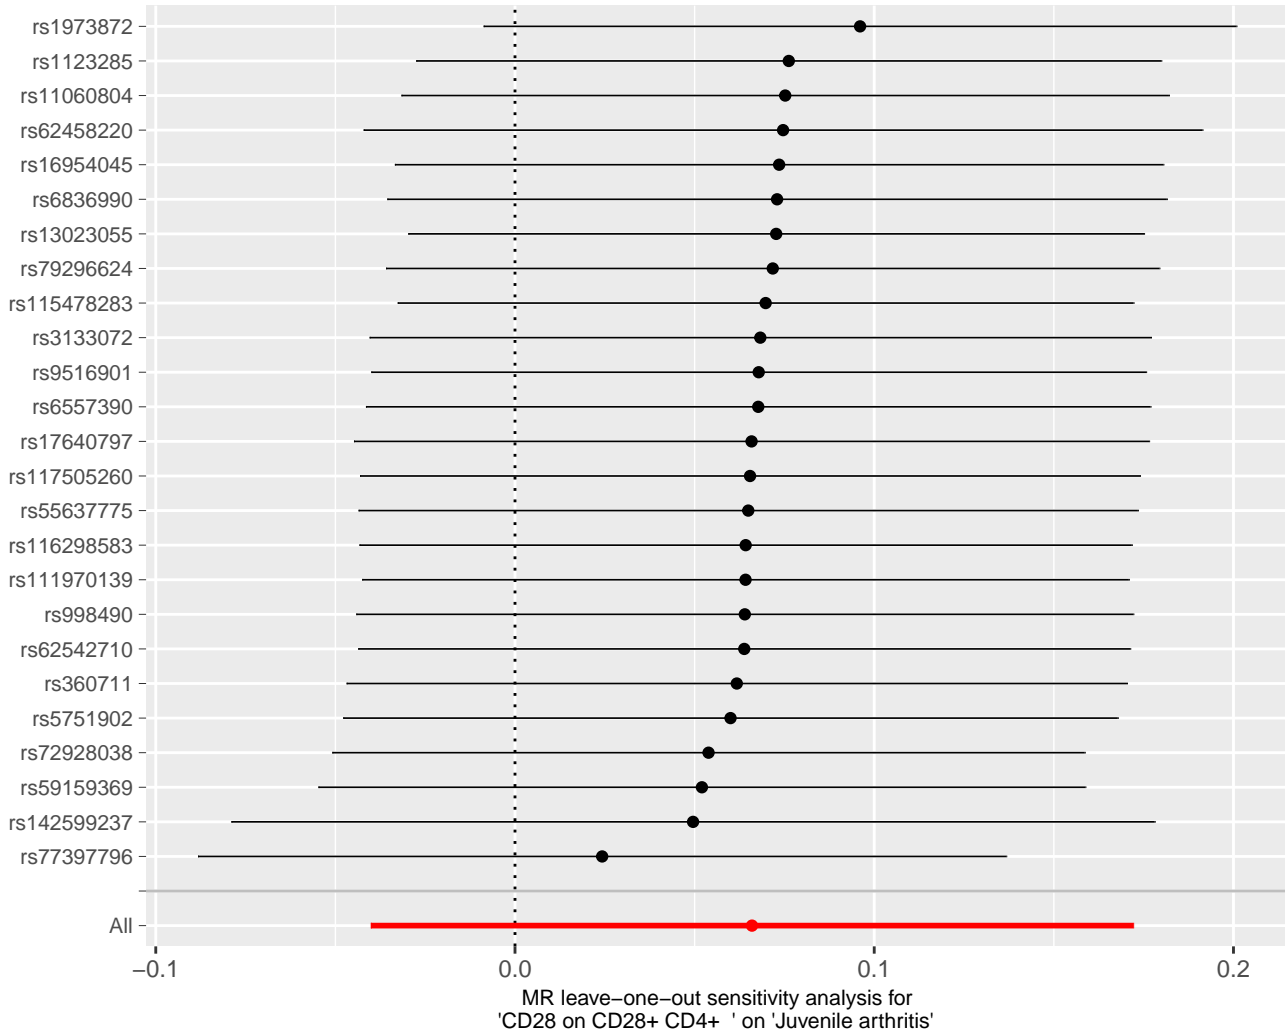

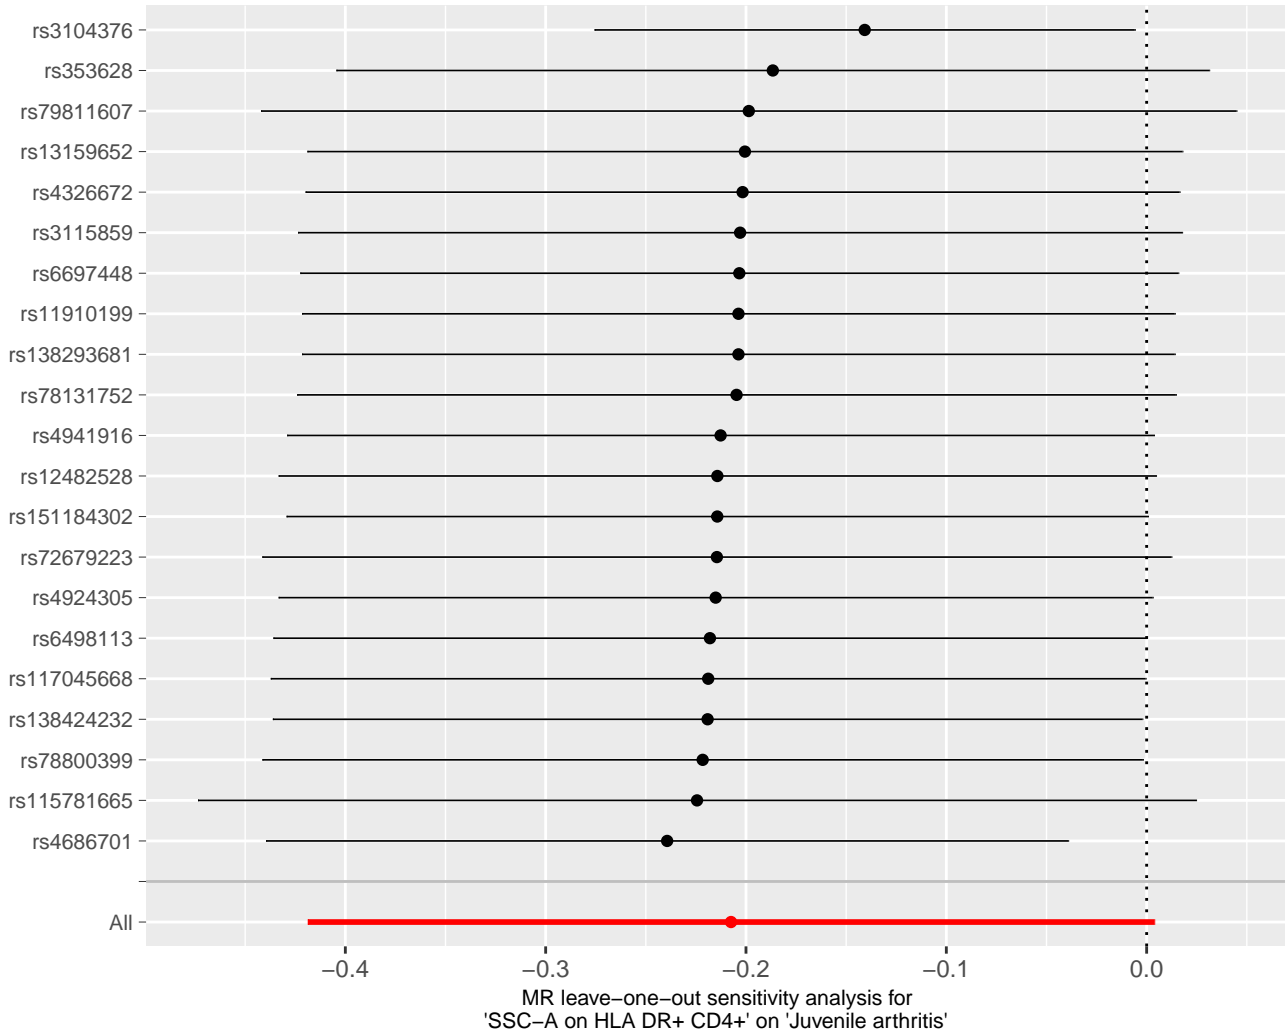



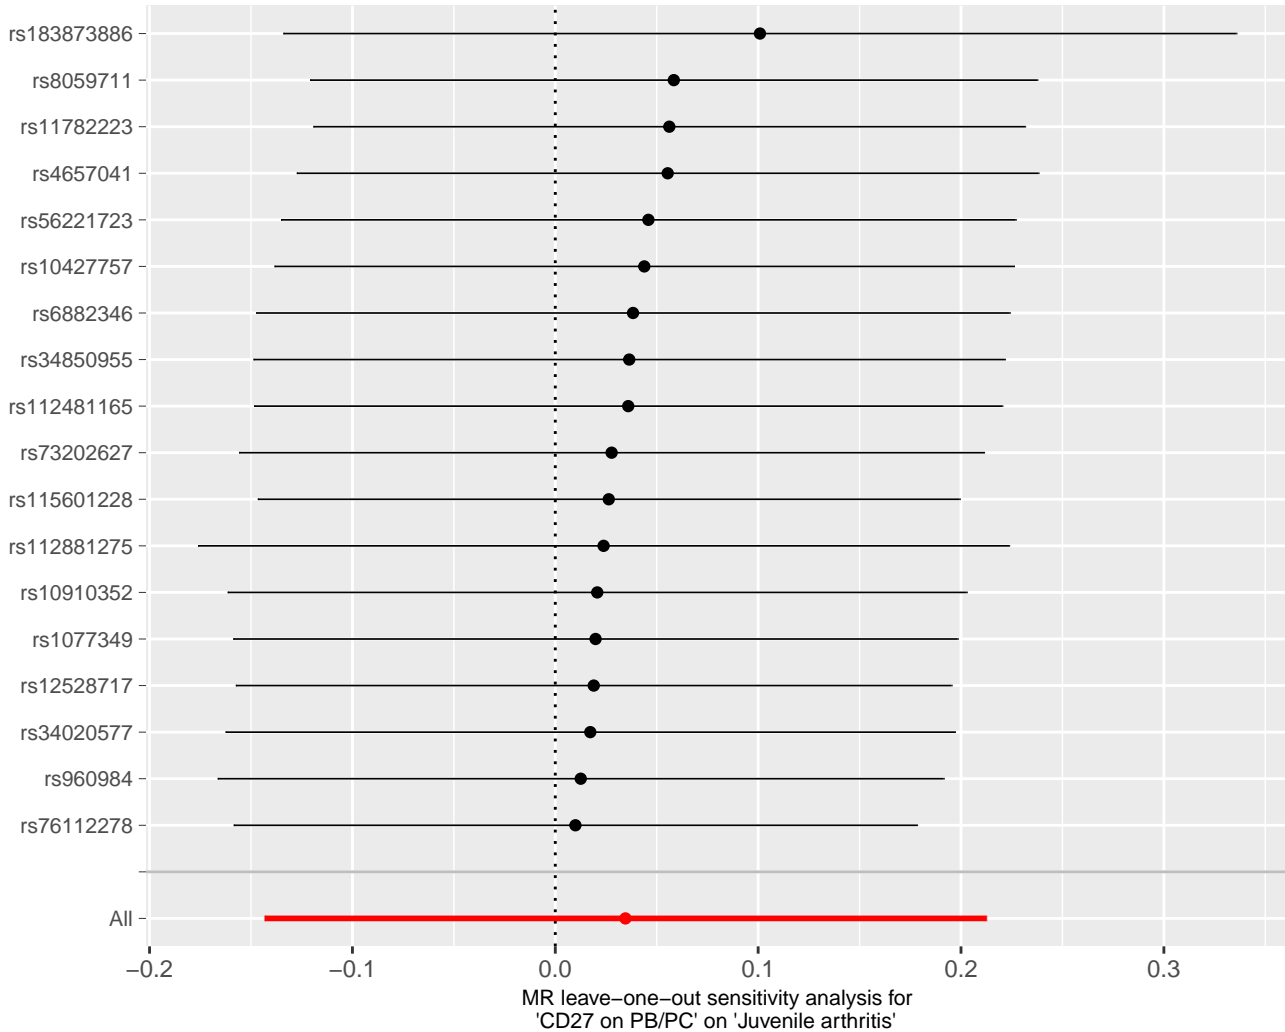

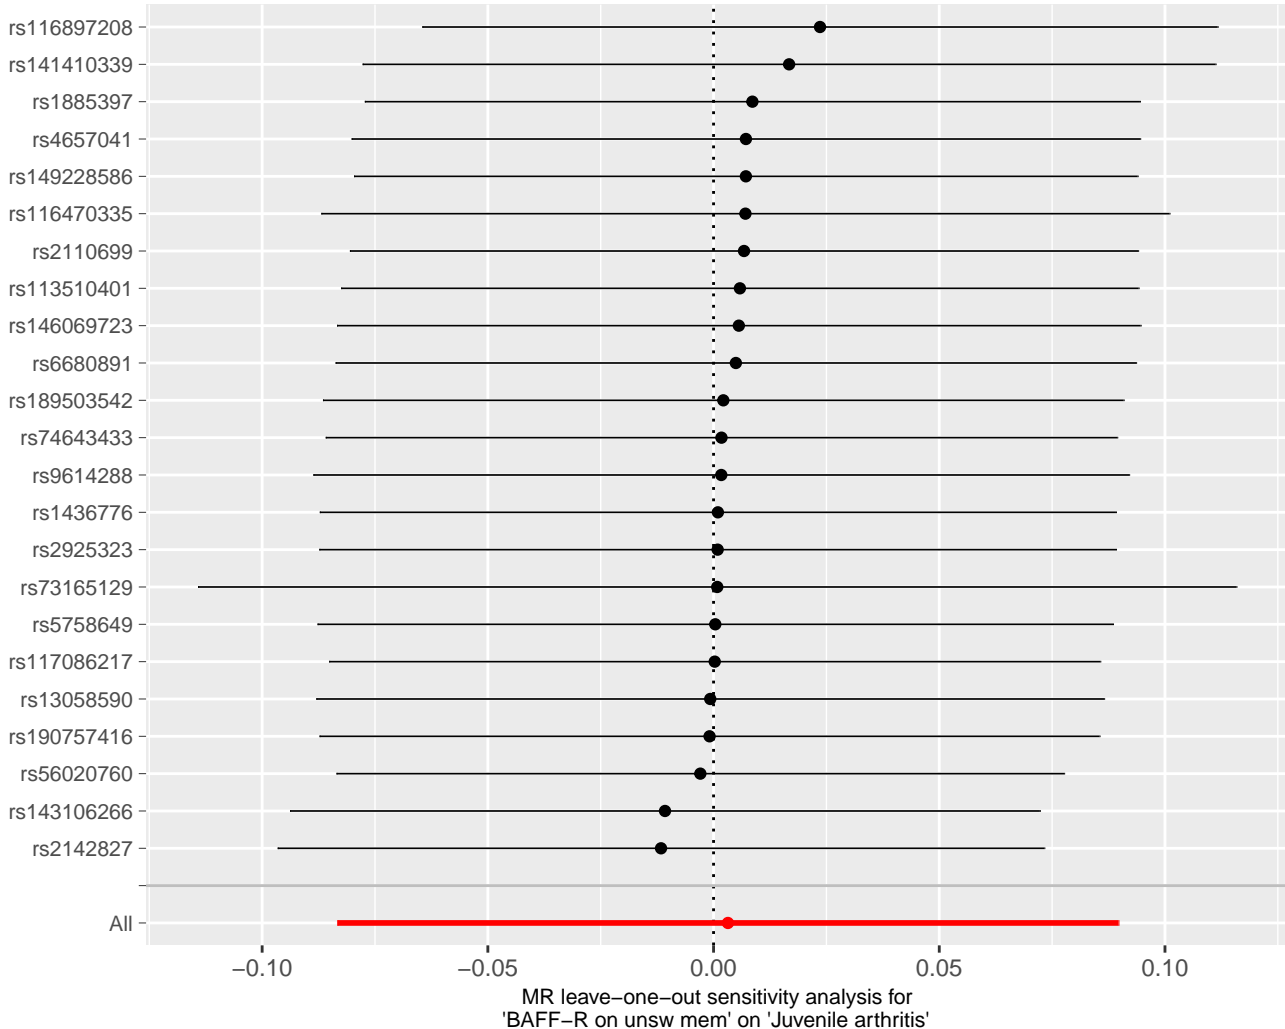

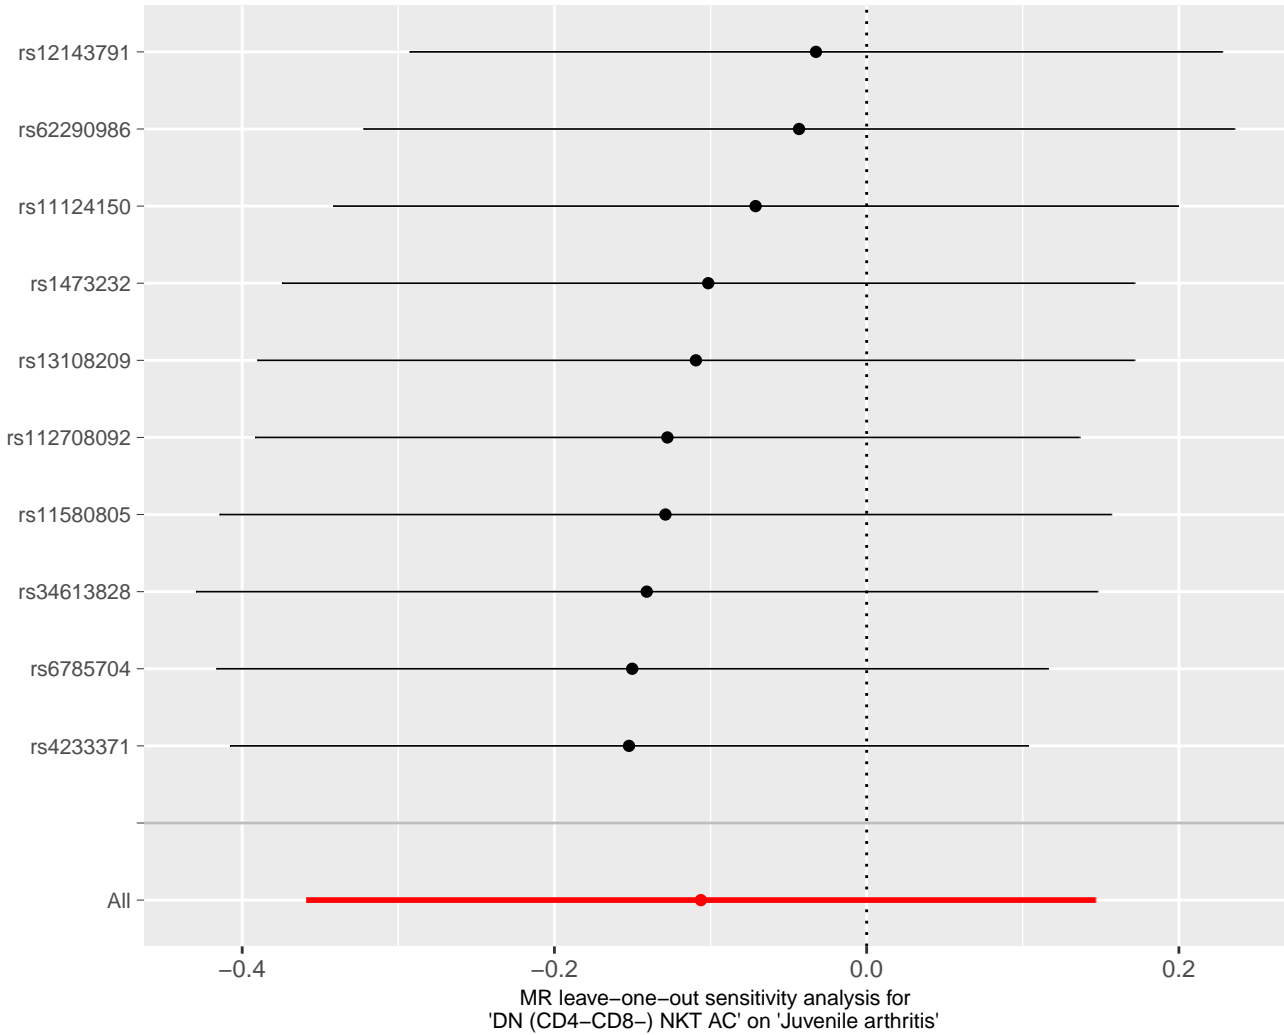

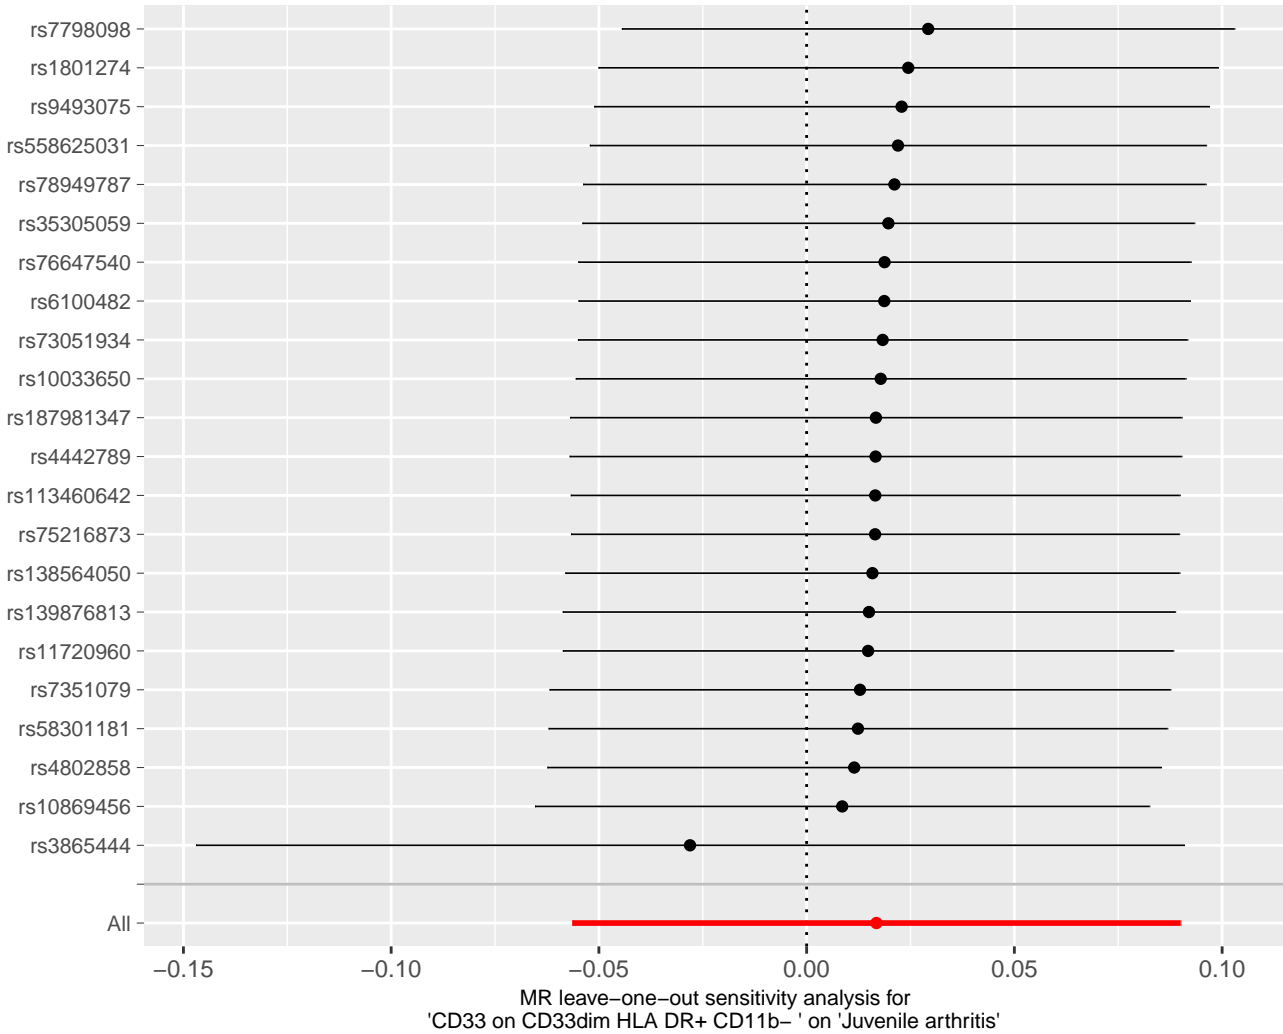

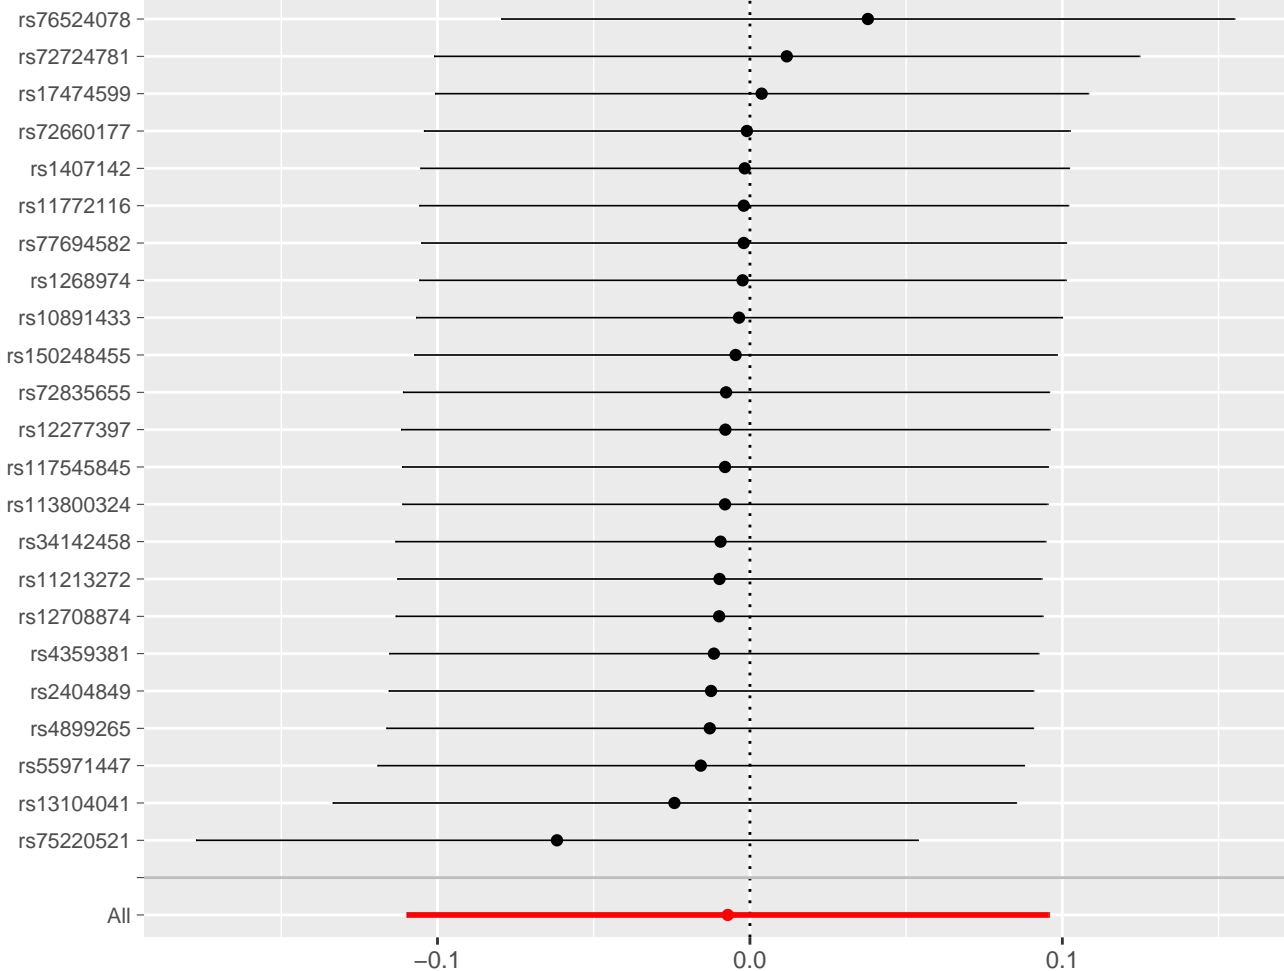

MR leave-one-out sensitivity analysis for 'CD11c+ CD62L- monocyte AC' on 'Juvenile arthritis'

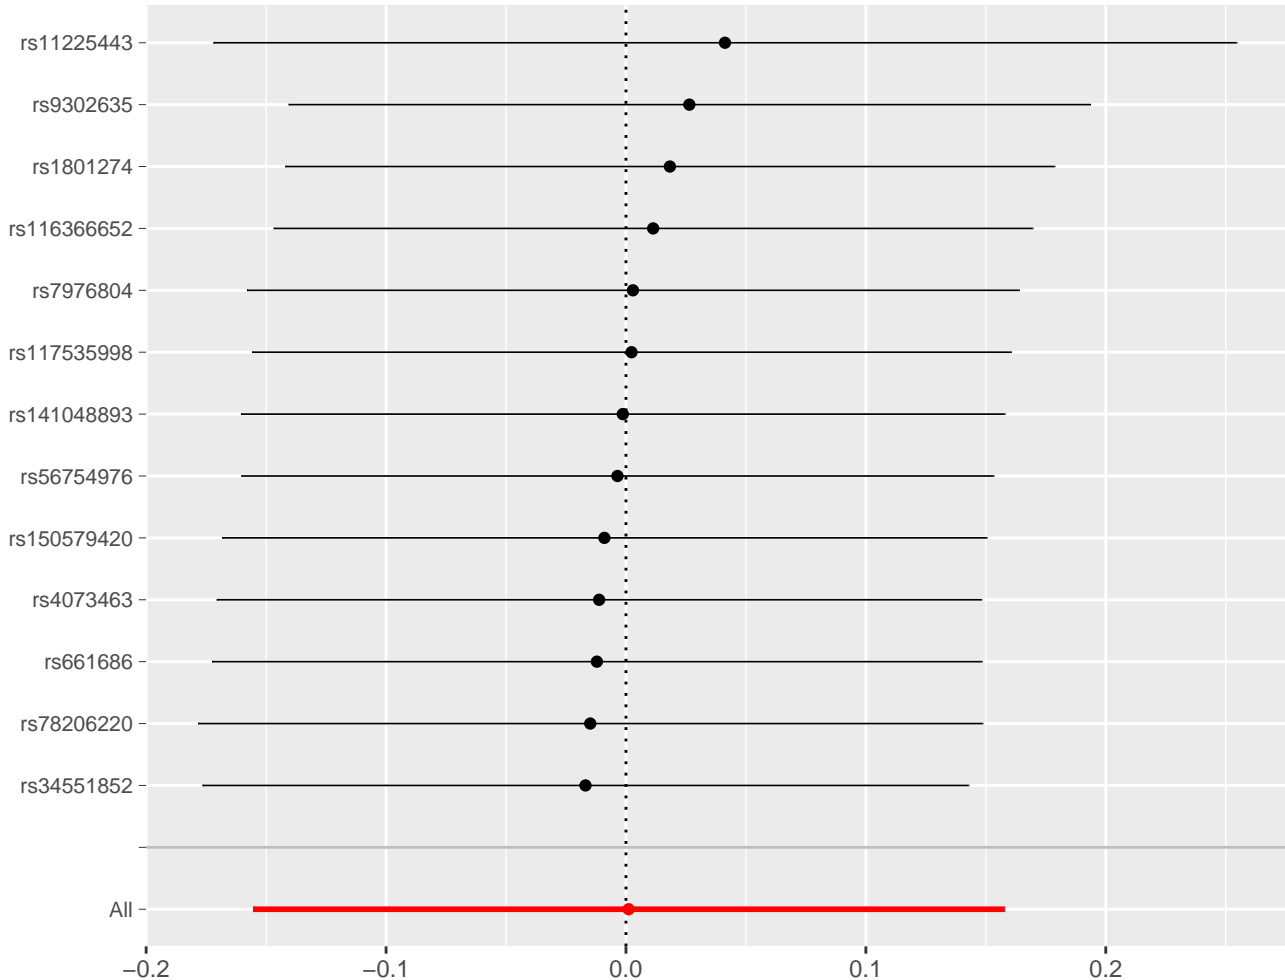

MR leave-one-out sensitivity analysis for 'CD4 on monocyte' on 'Juvenile arthritis'

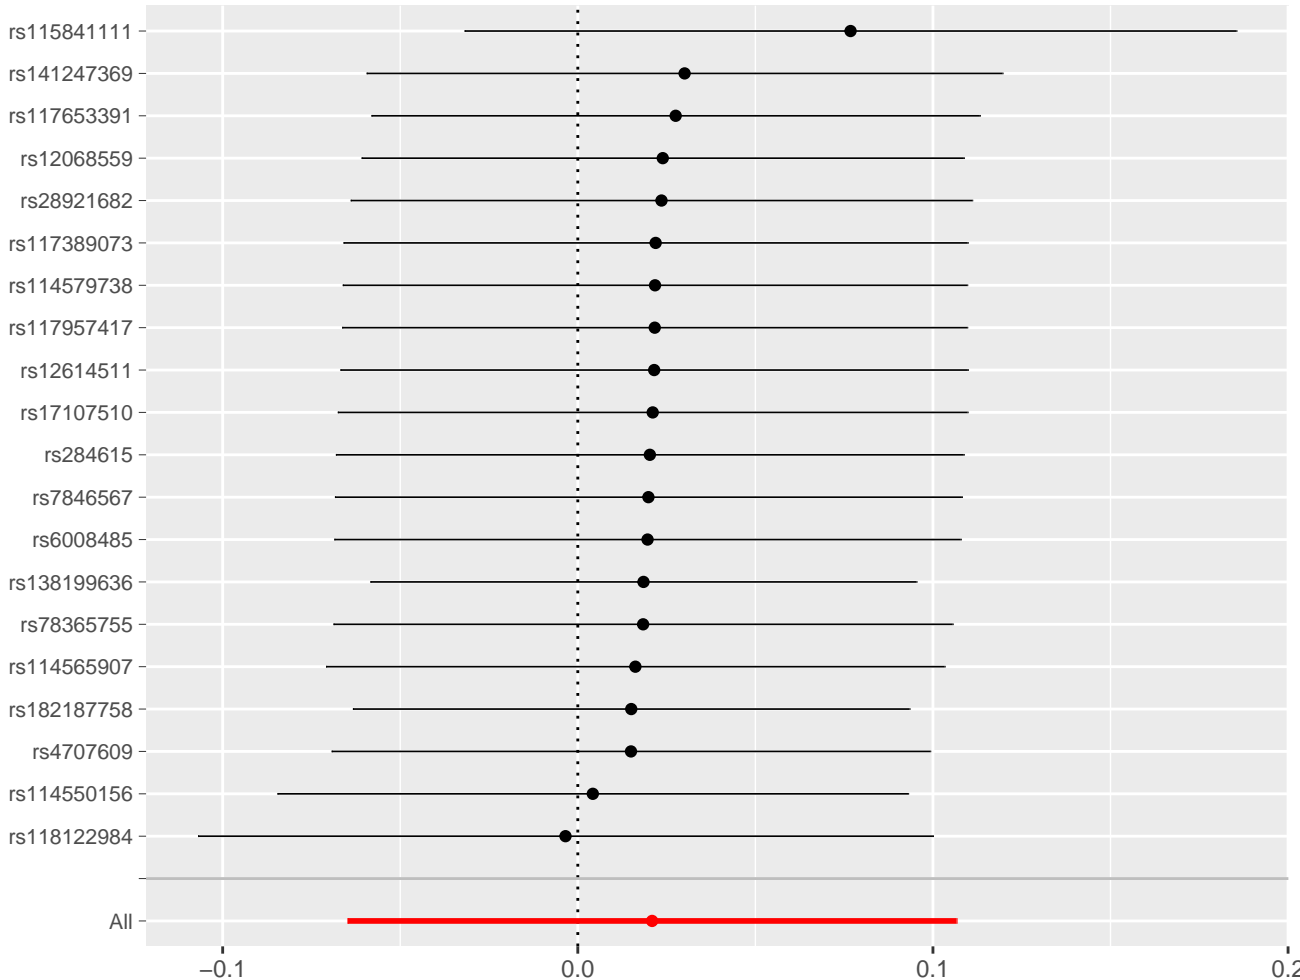

MR leave-one-out sensitivity analysis for 'CD28 on CD39+ resting Treg' on 'Juvenile arthritis'

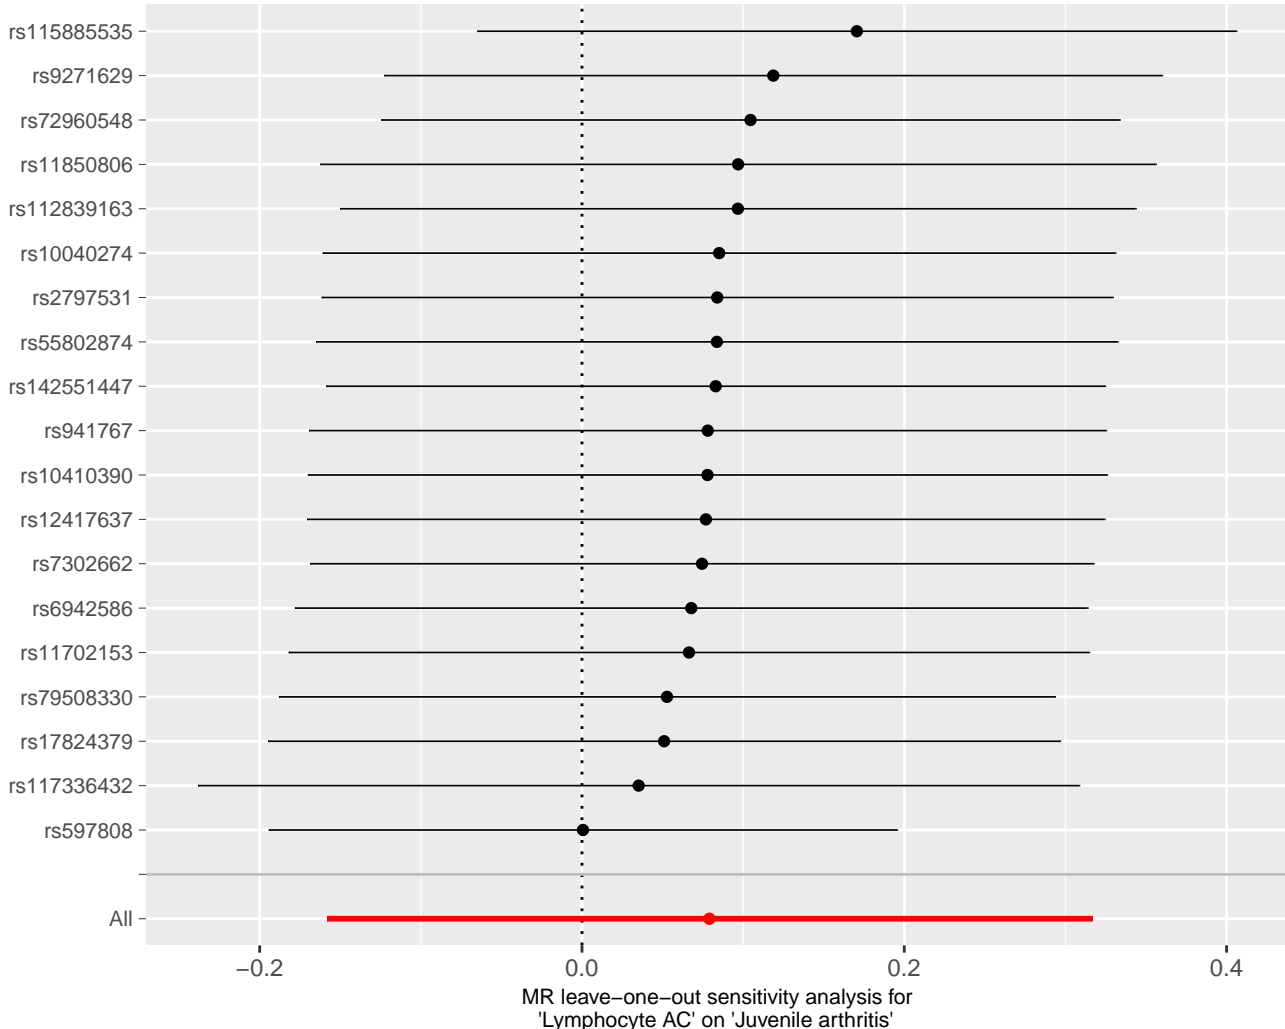



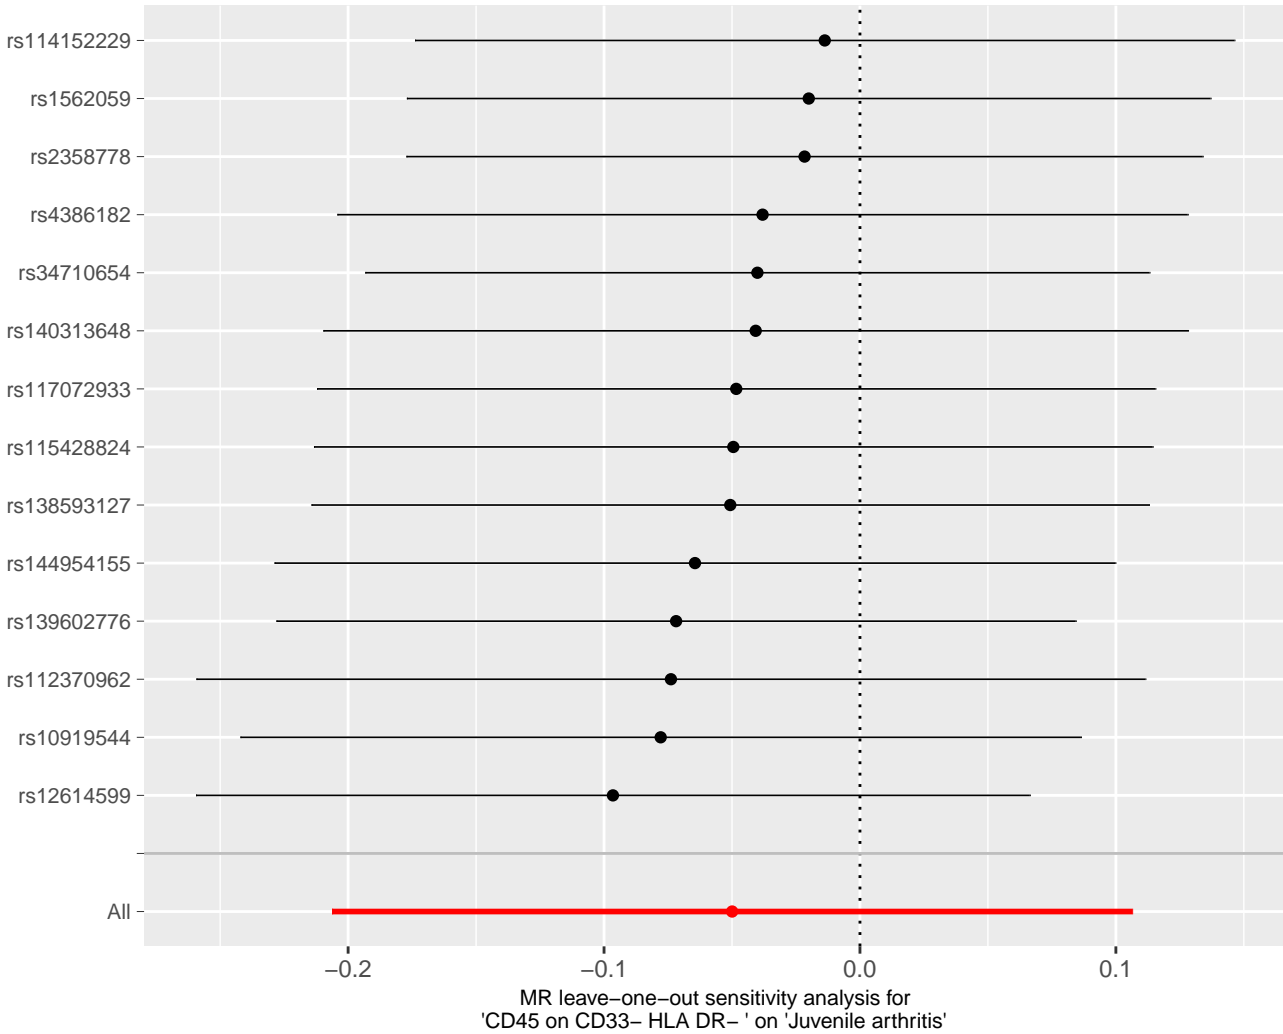

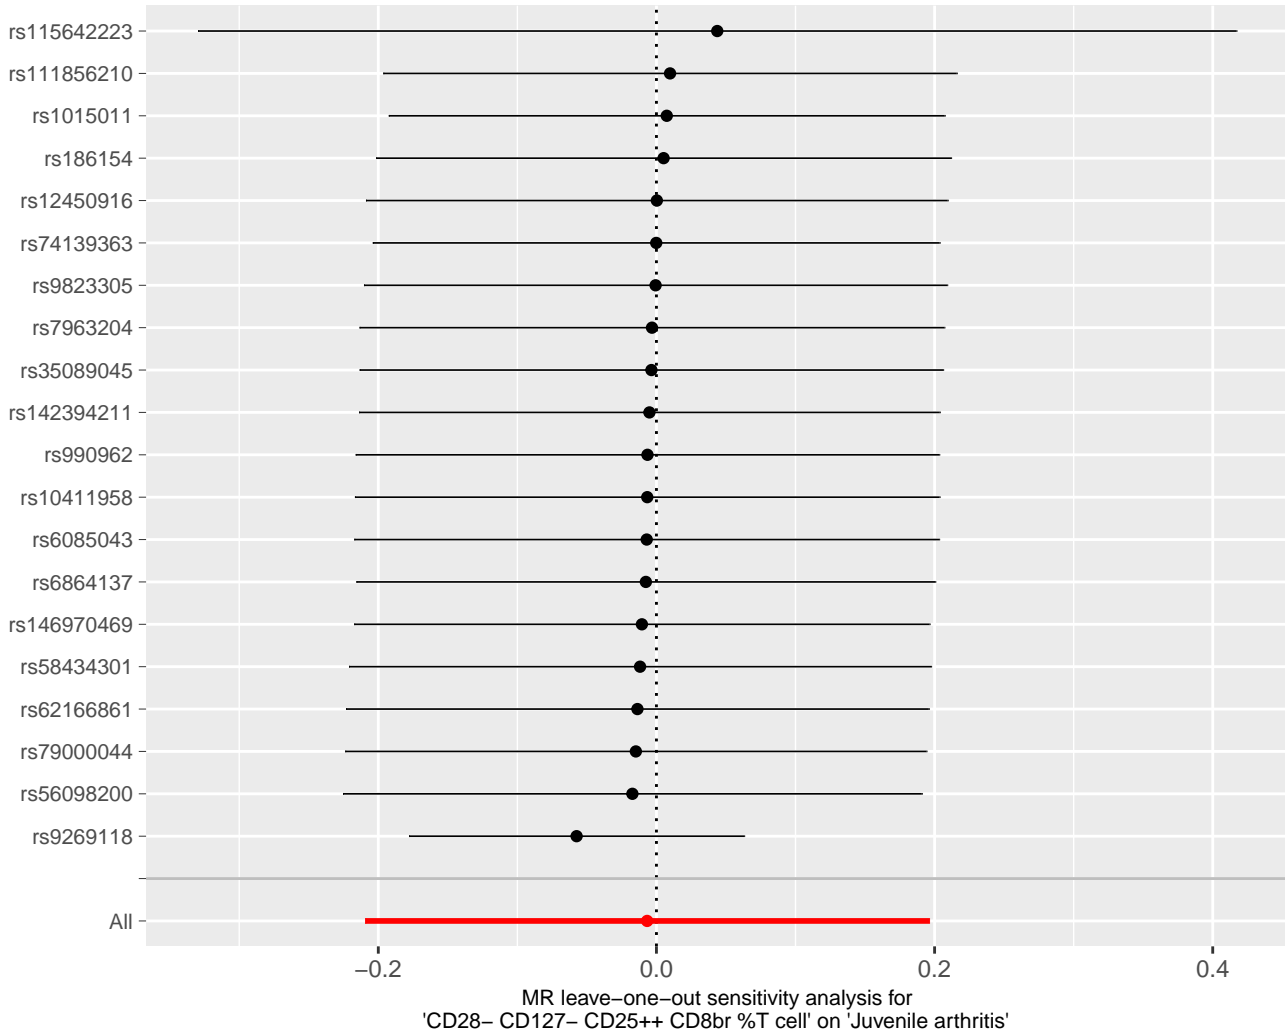

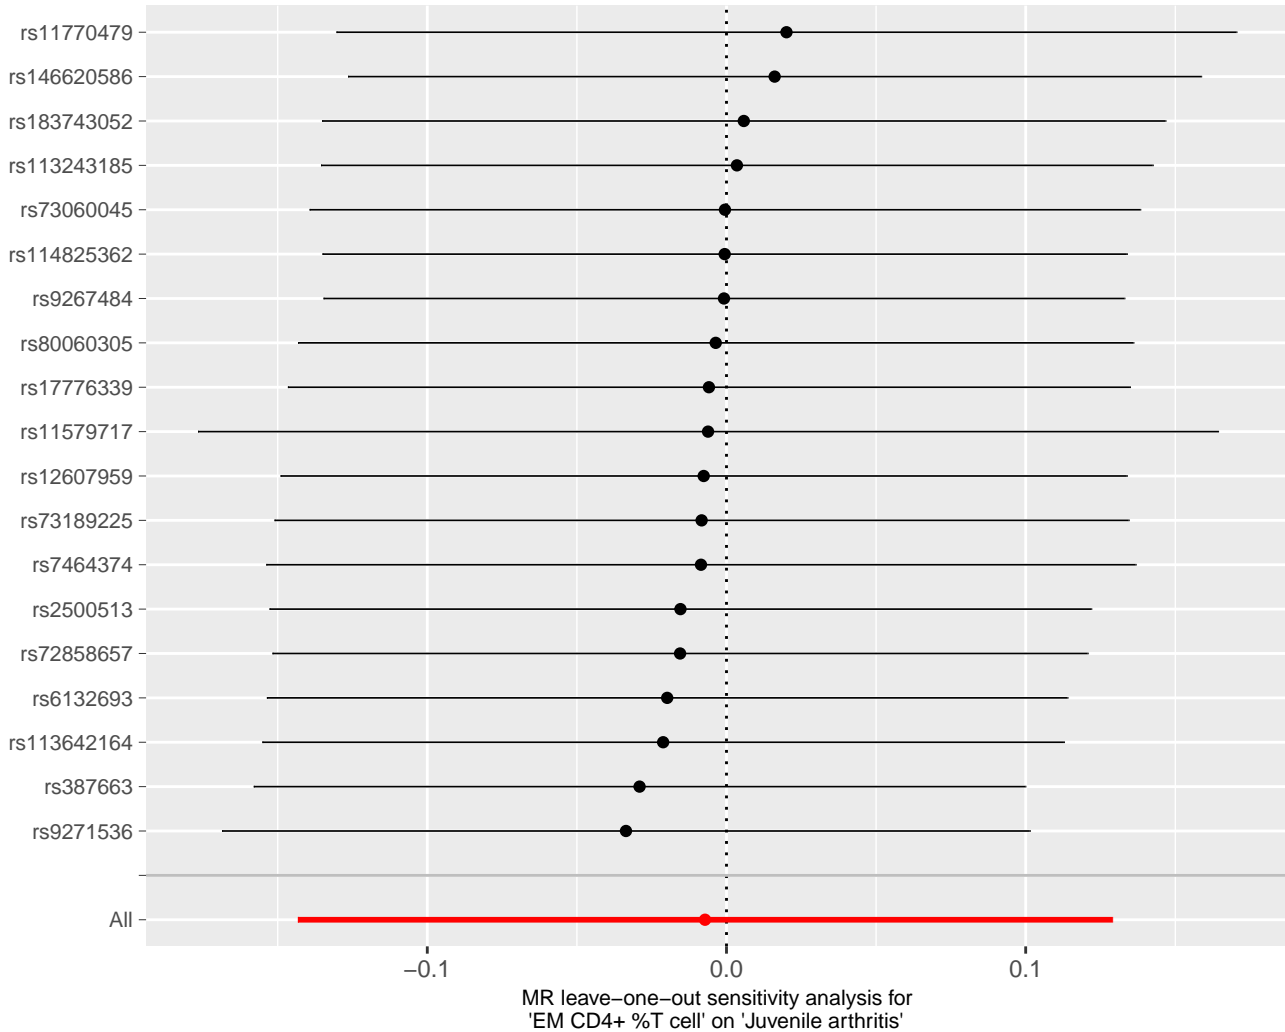

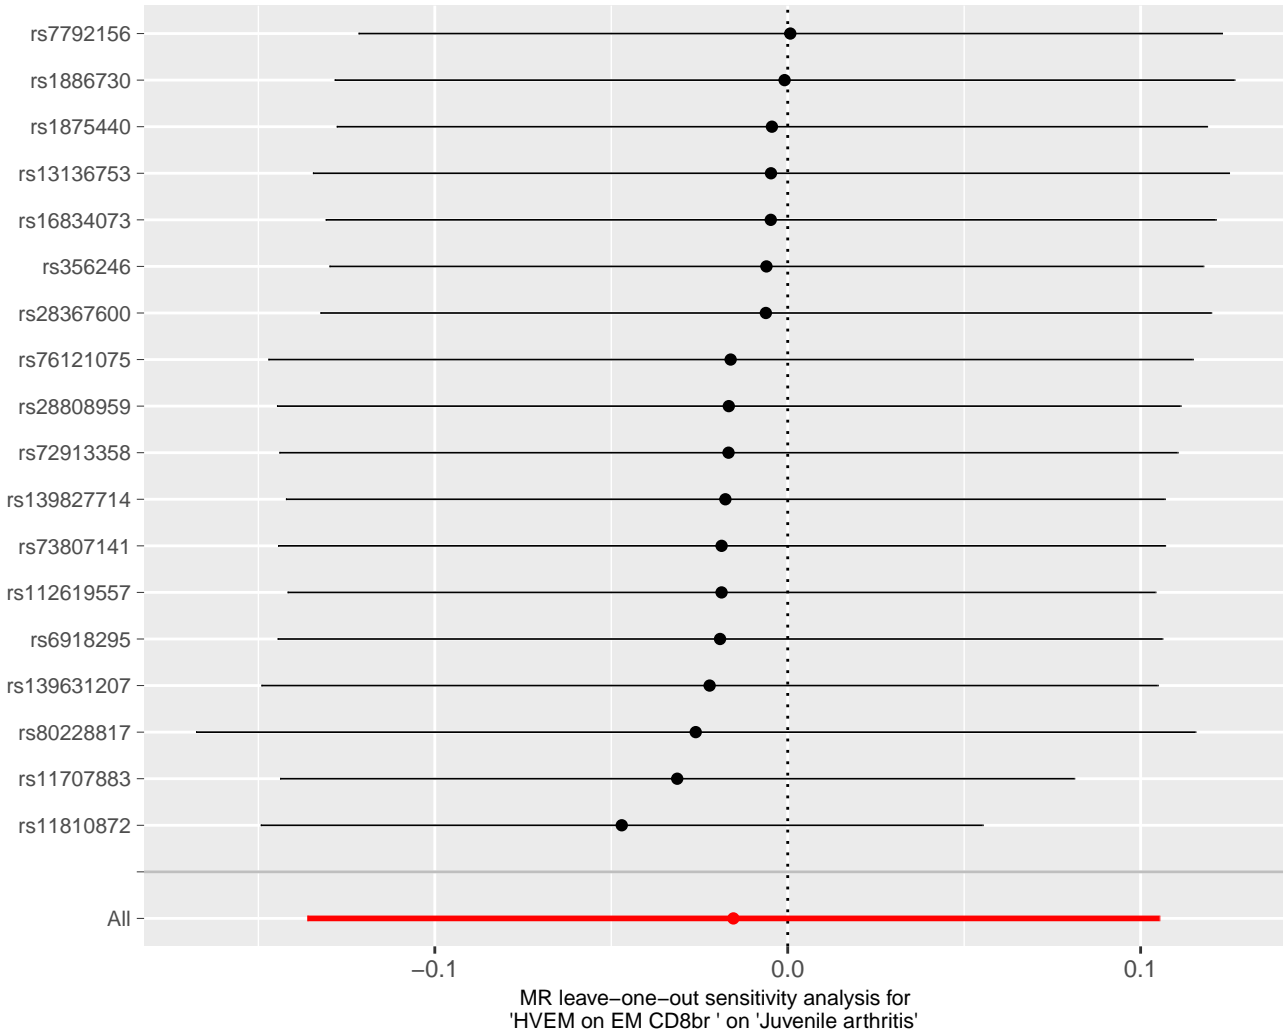

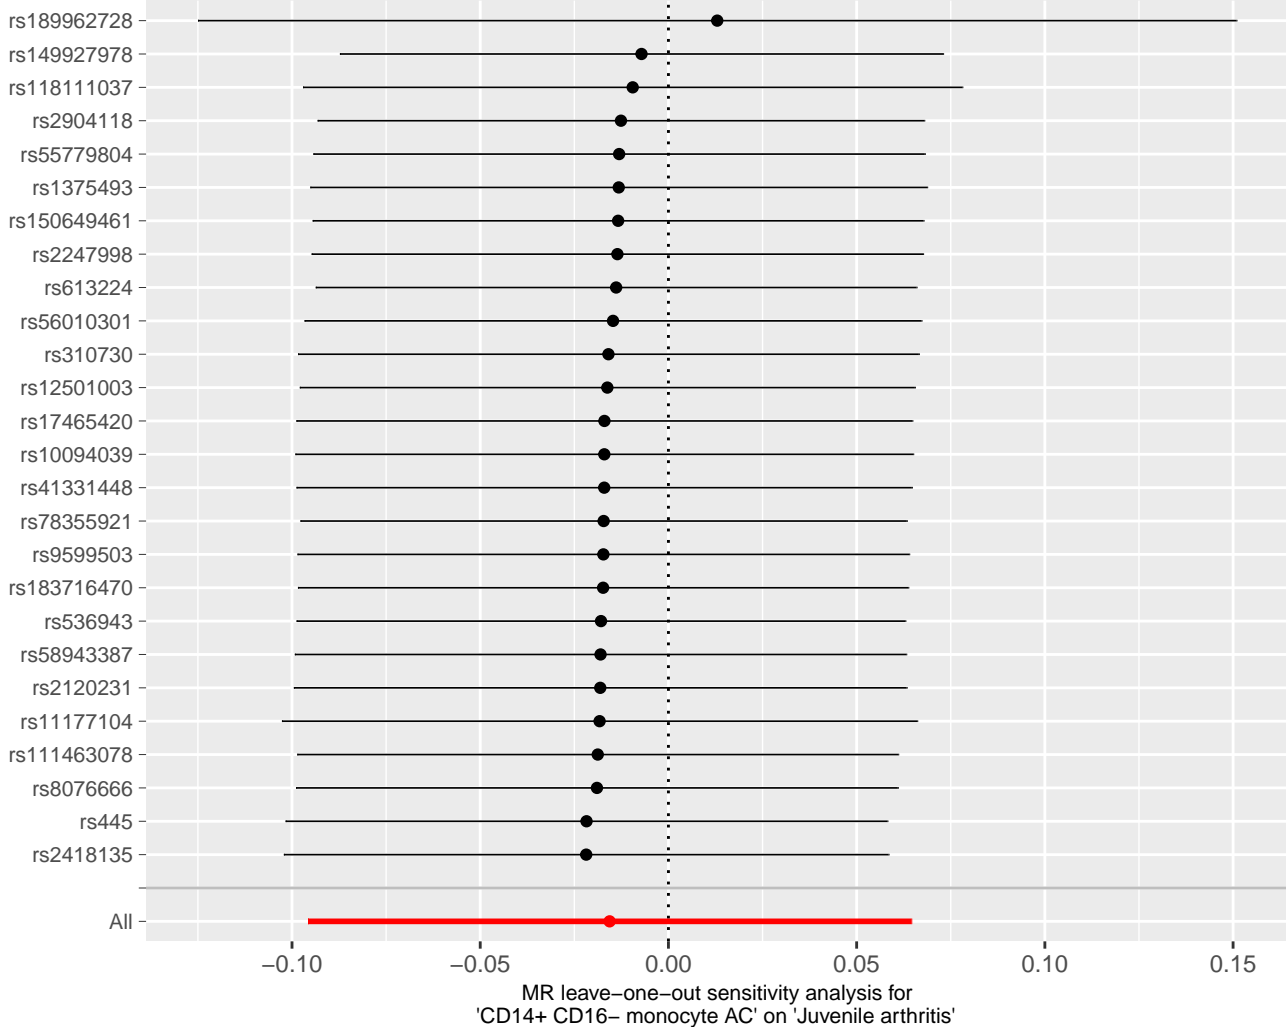

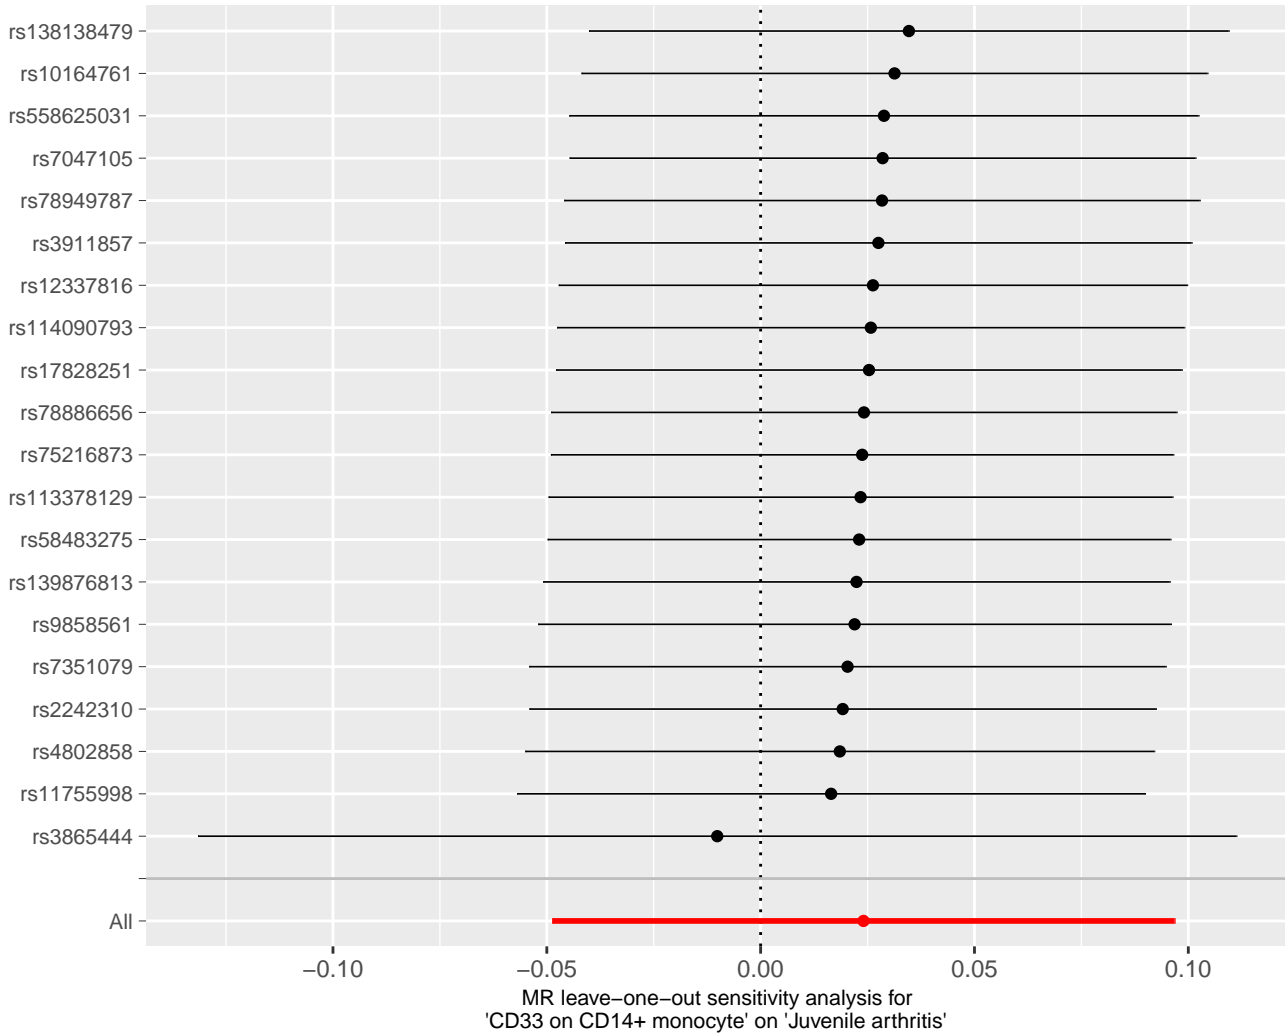

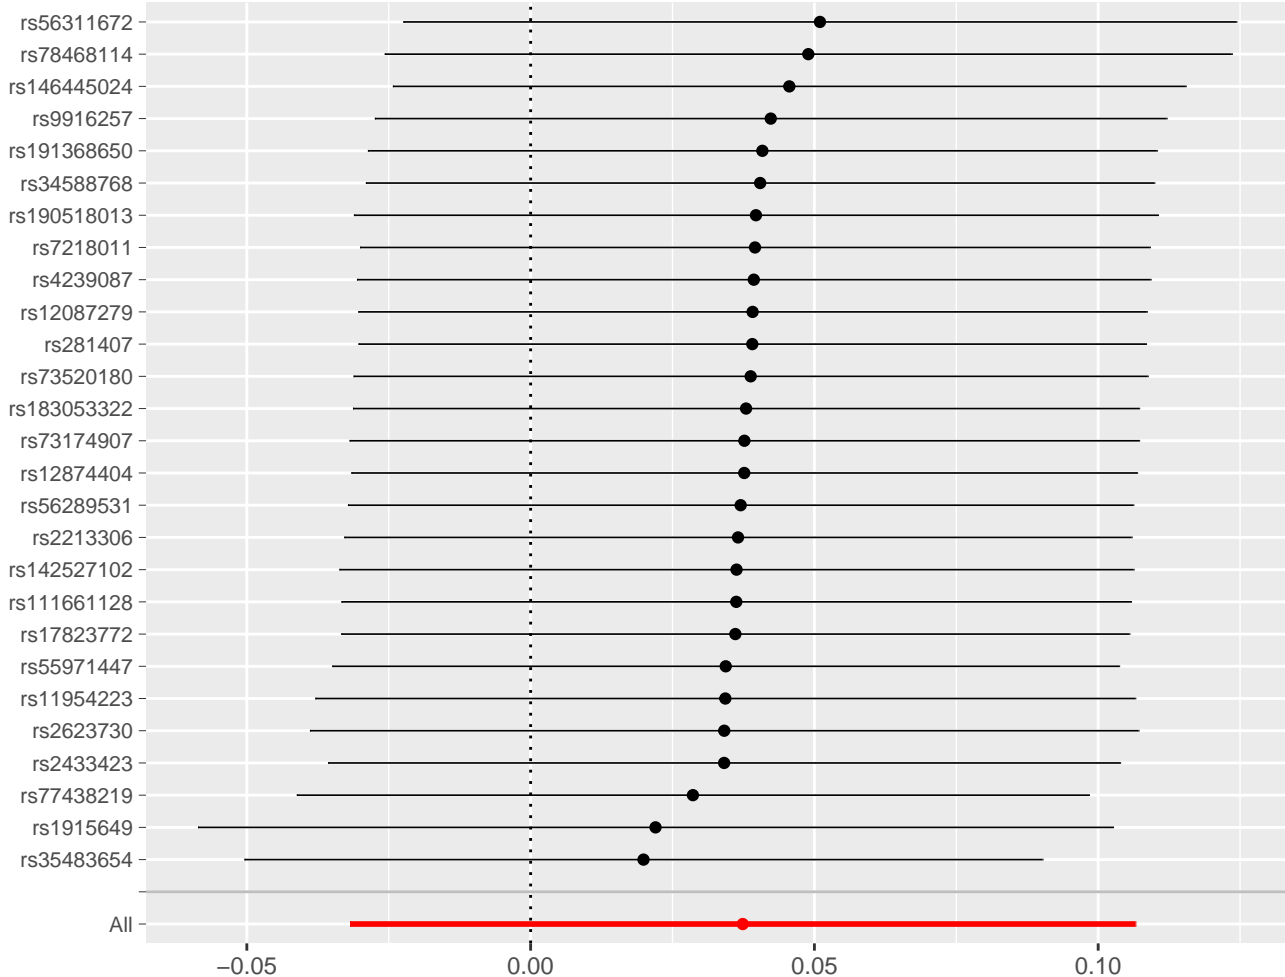

MR leave-one-out sensitivity analysis for 'NK %CD3- lymphocyte' on 'Juvenile arthritis'

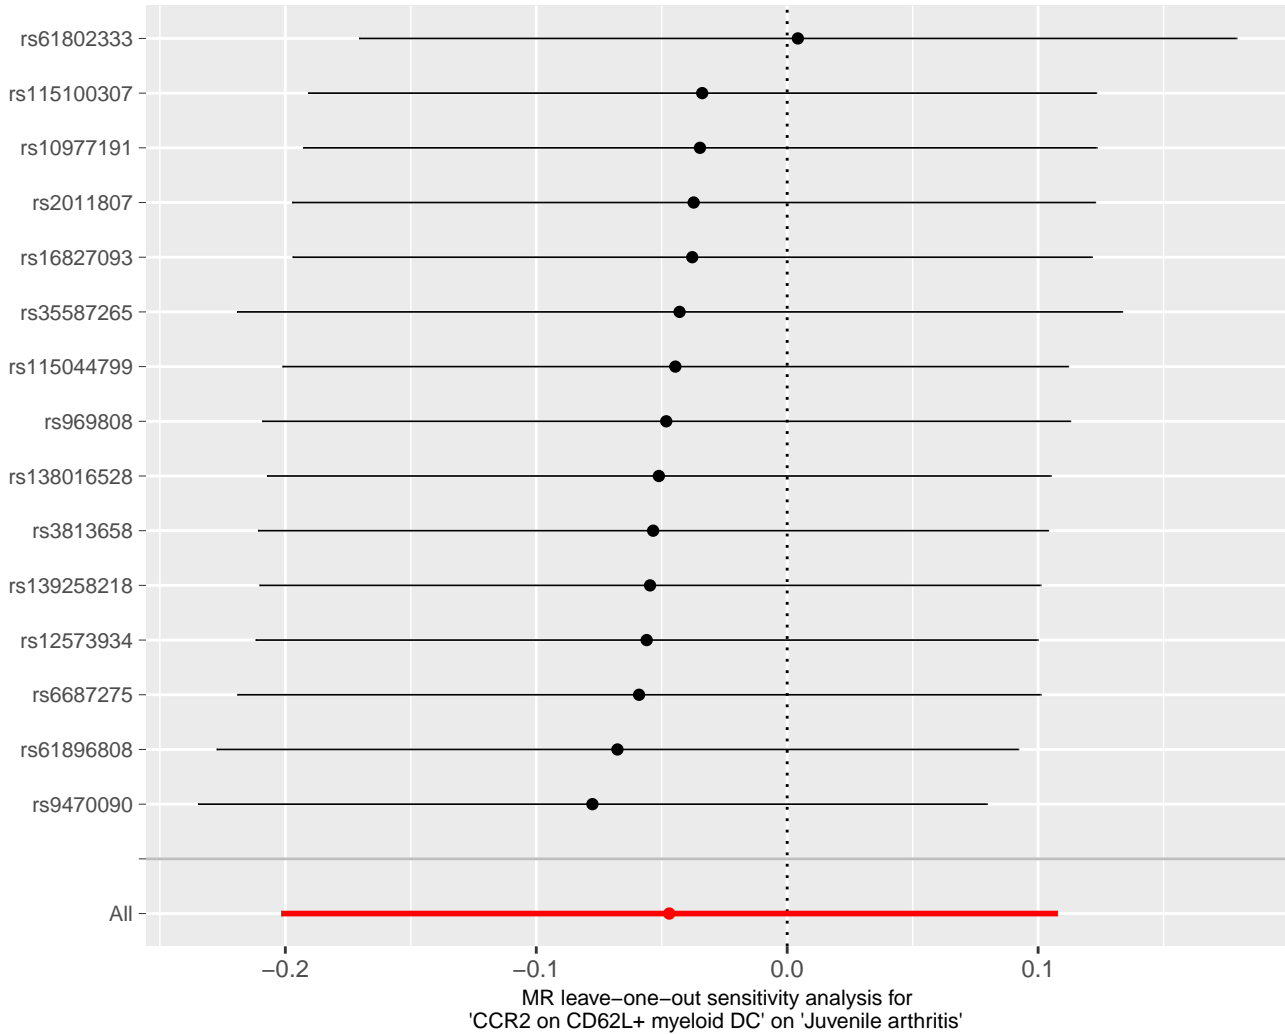



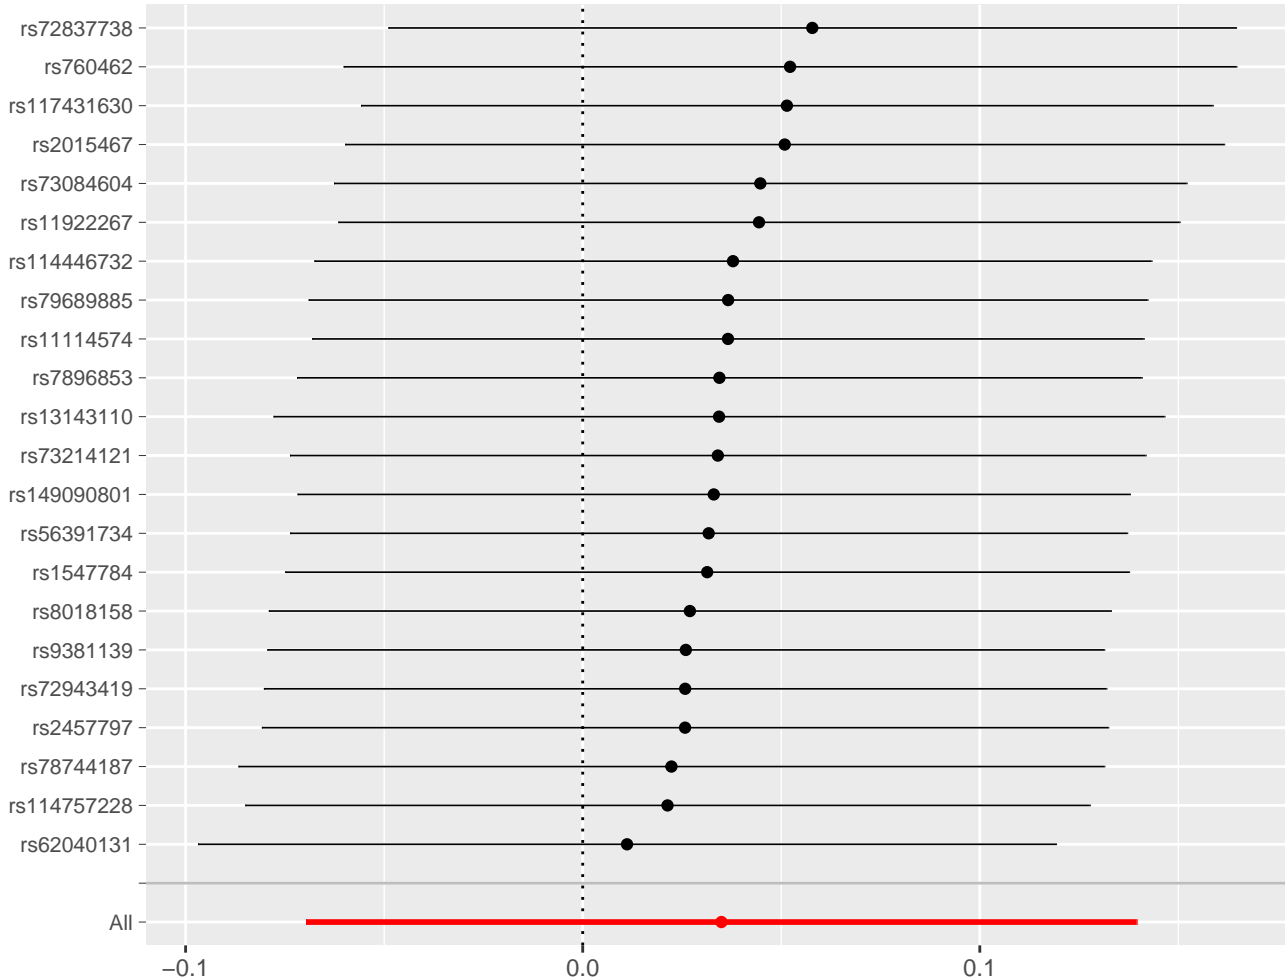

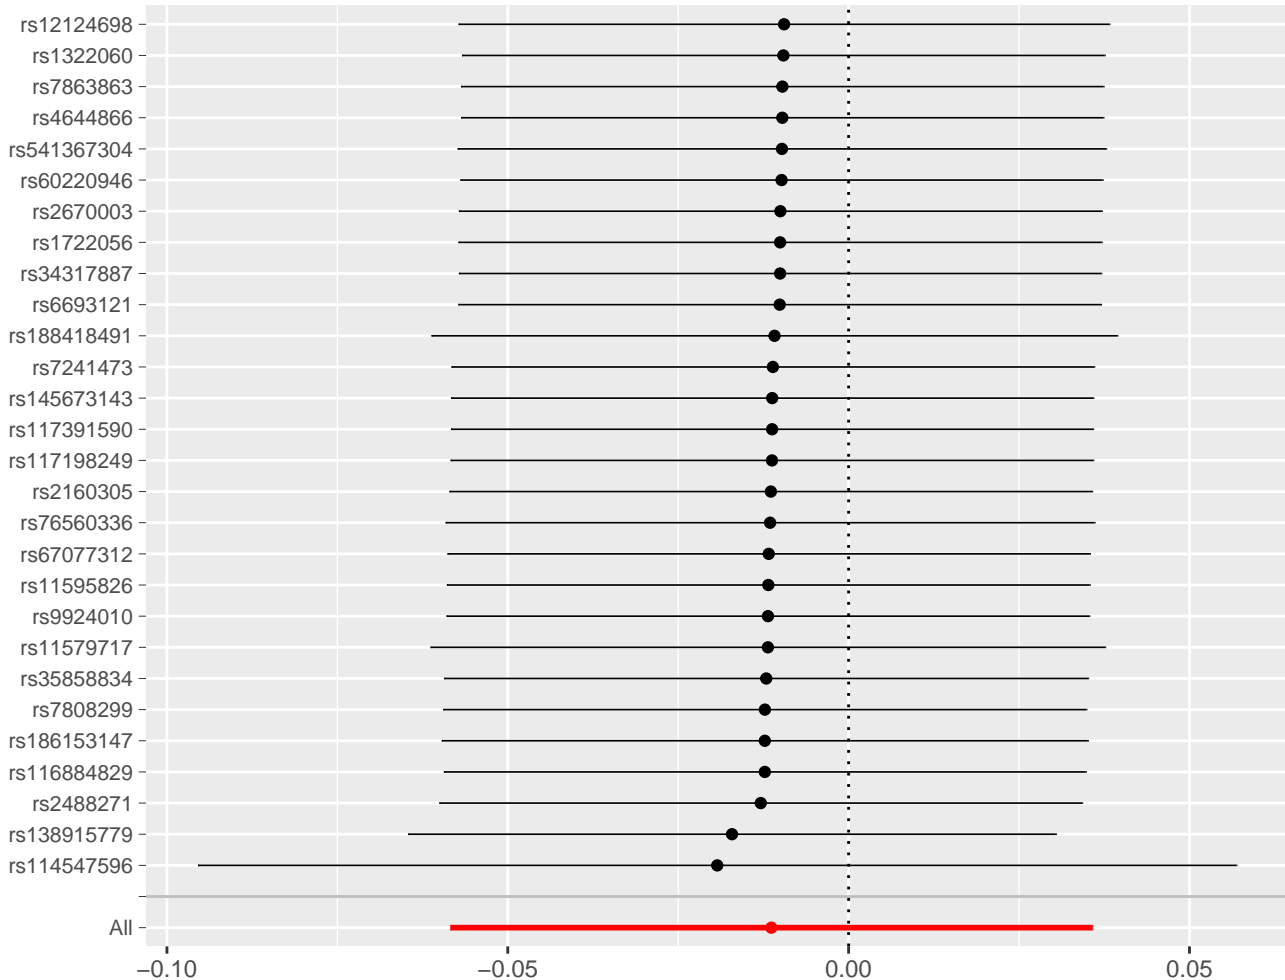

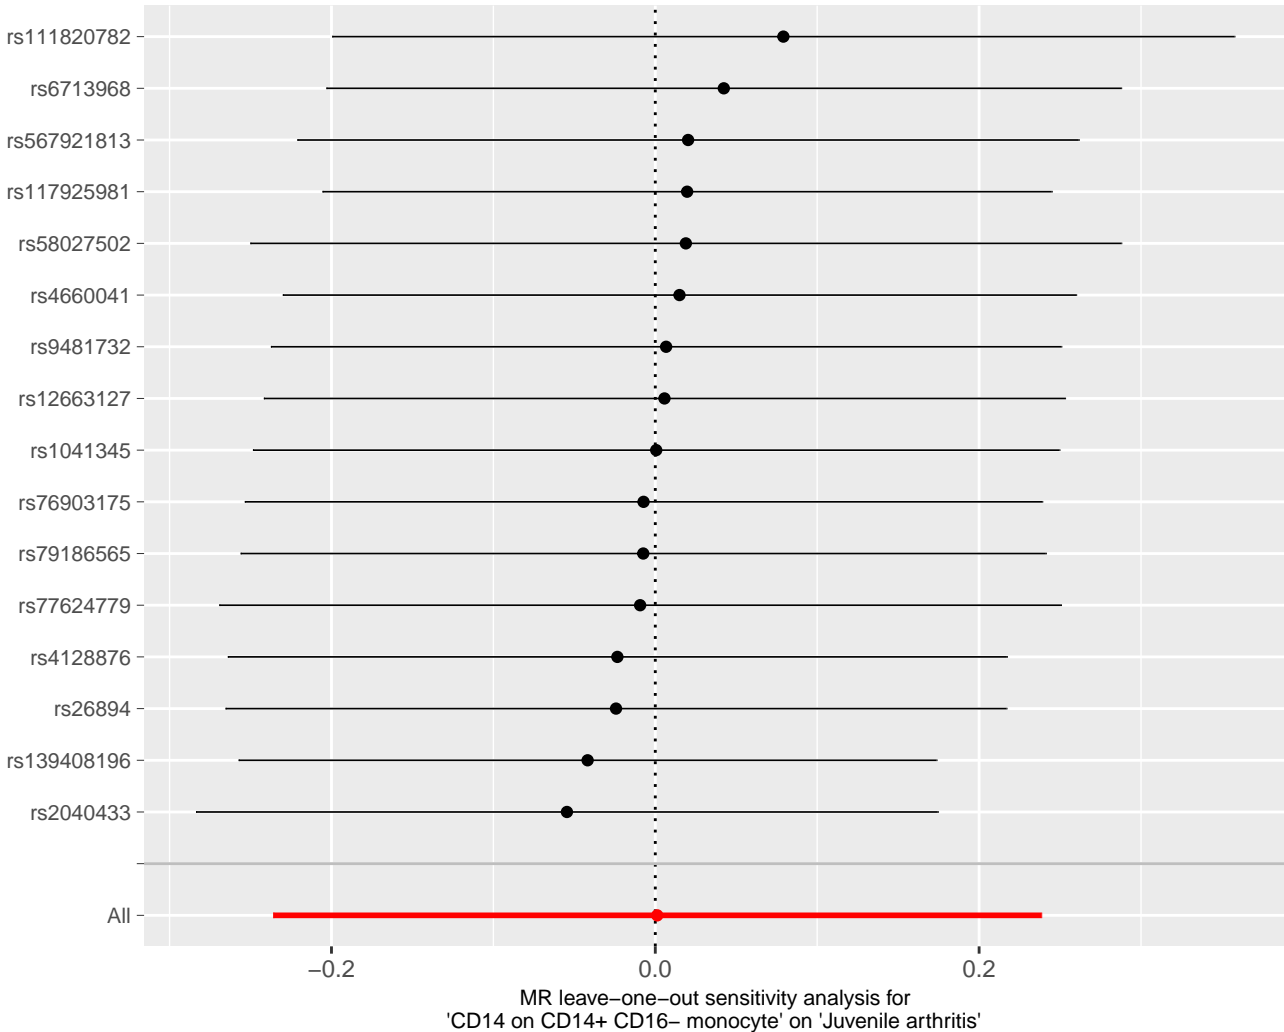

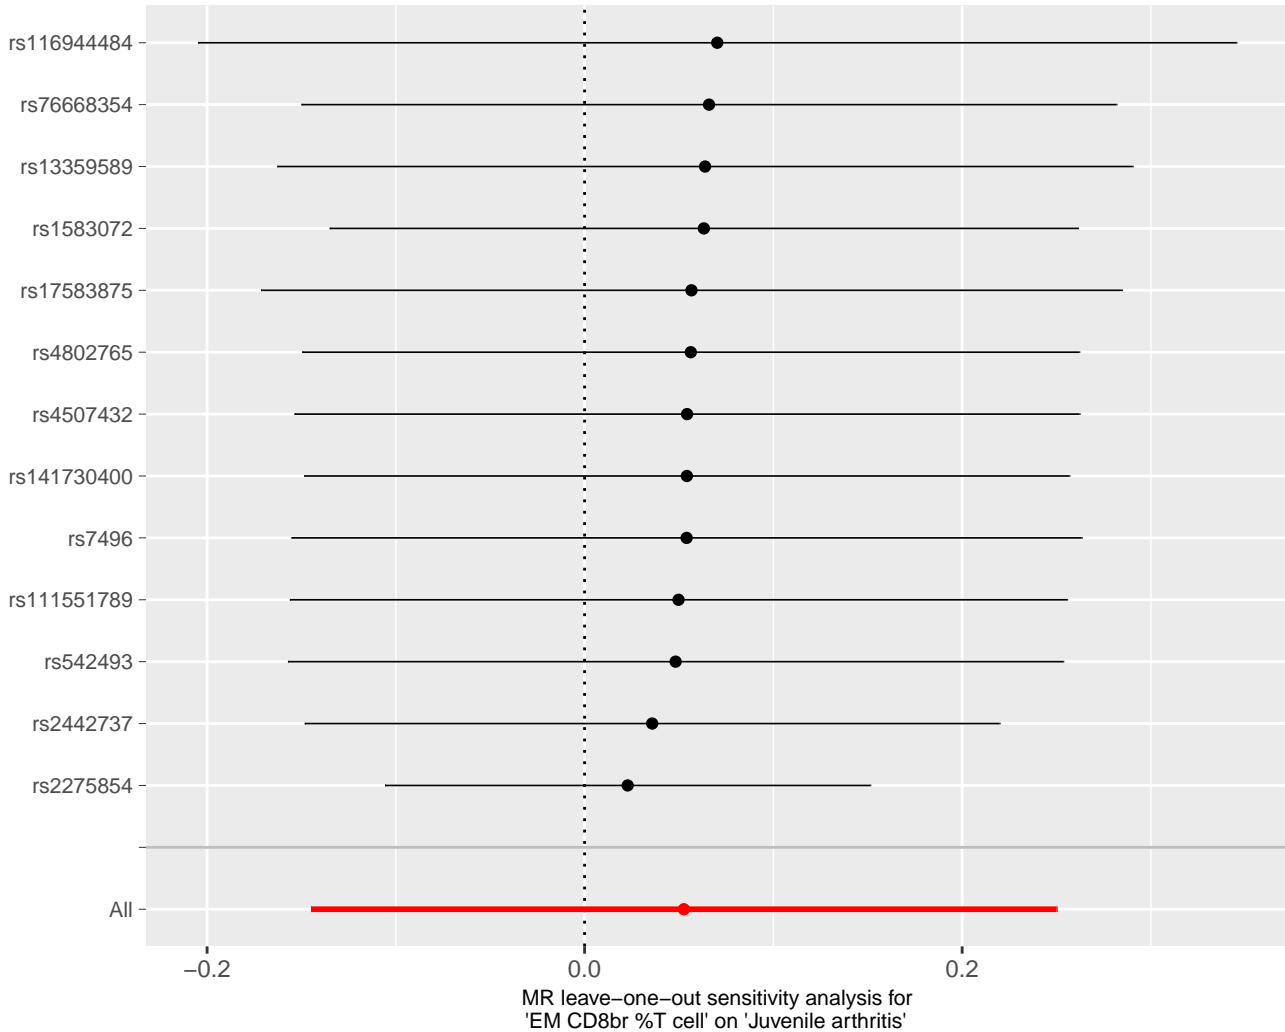

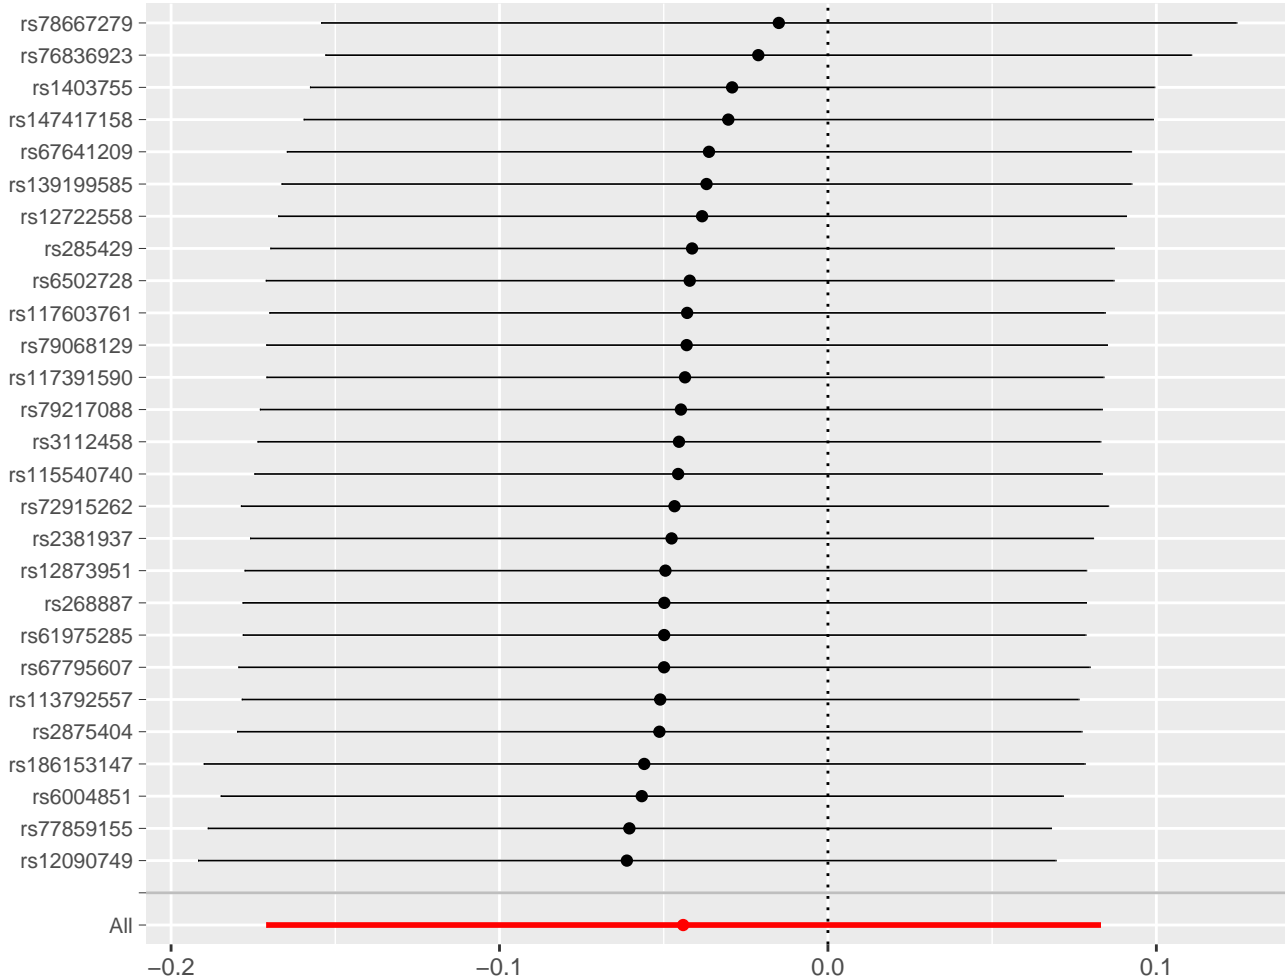

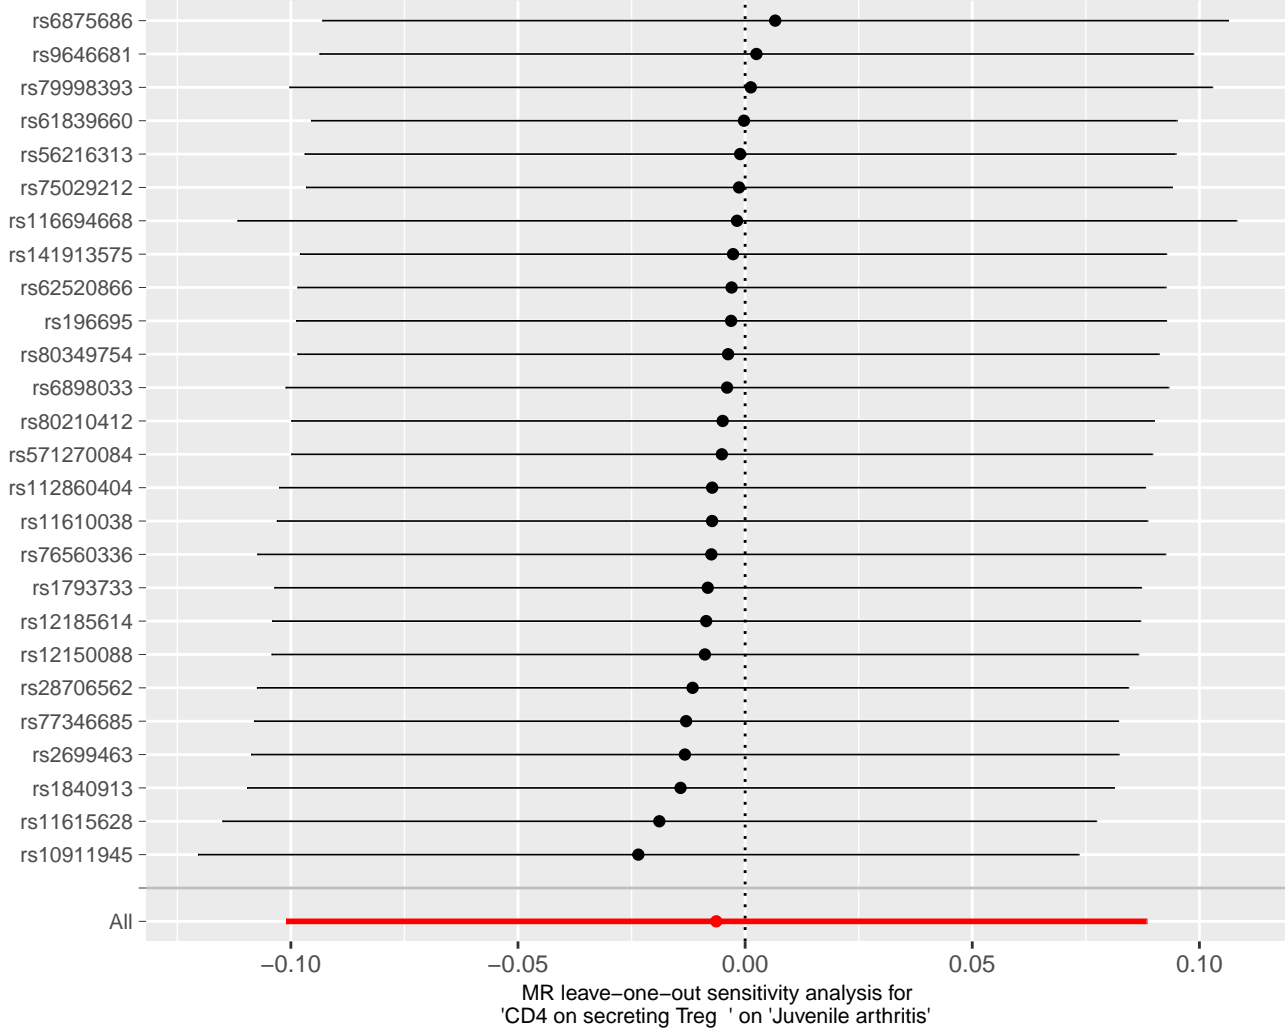

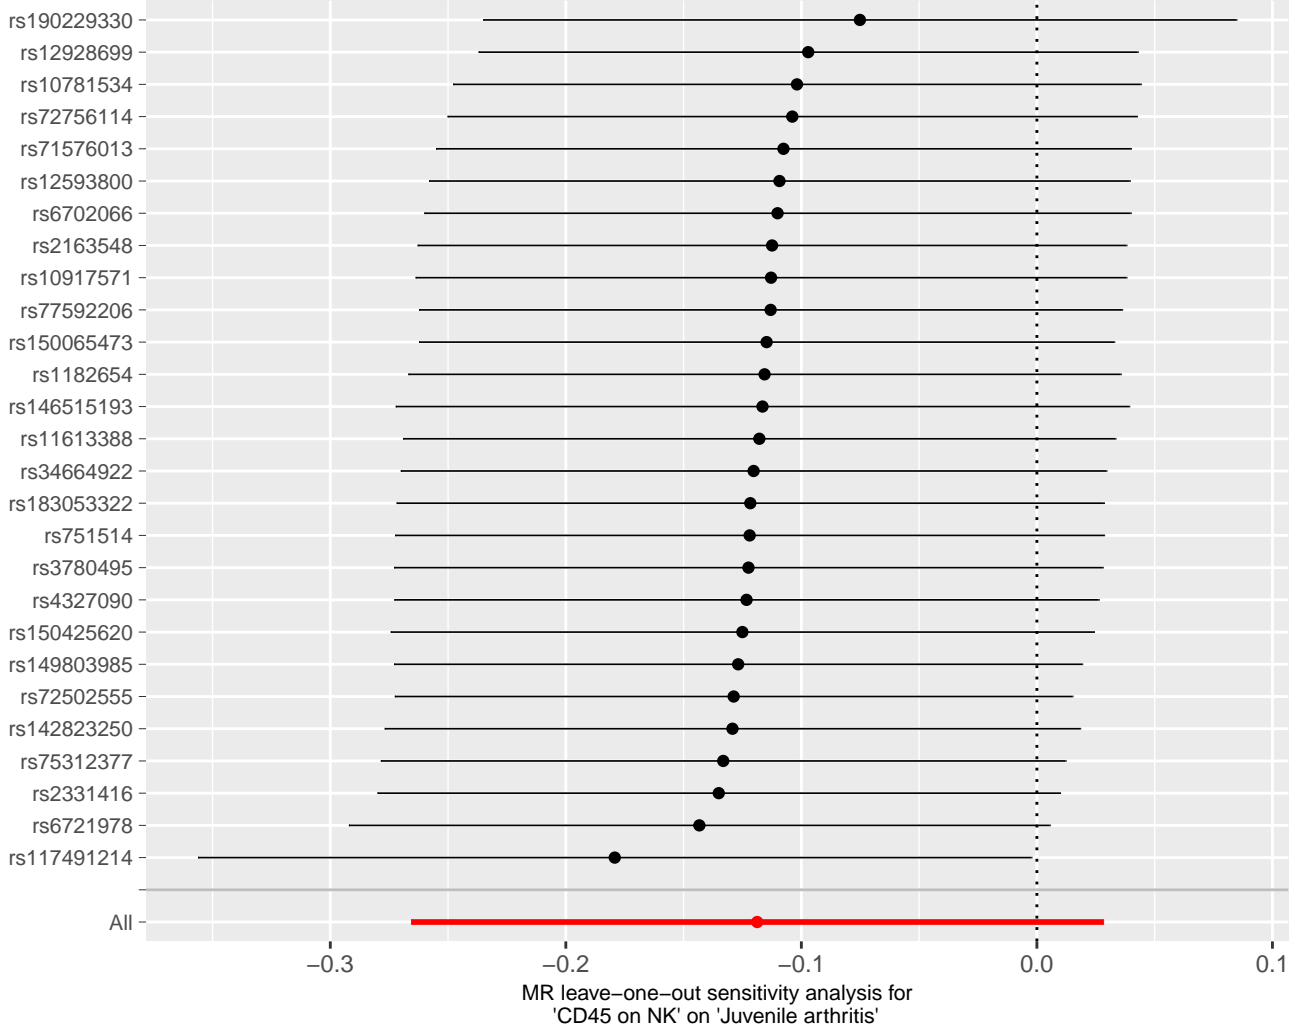

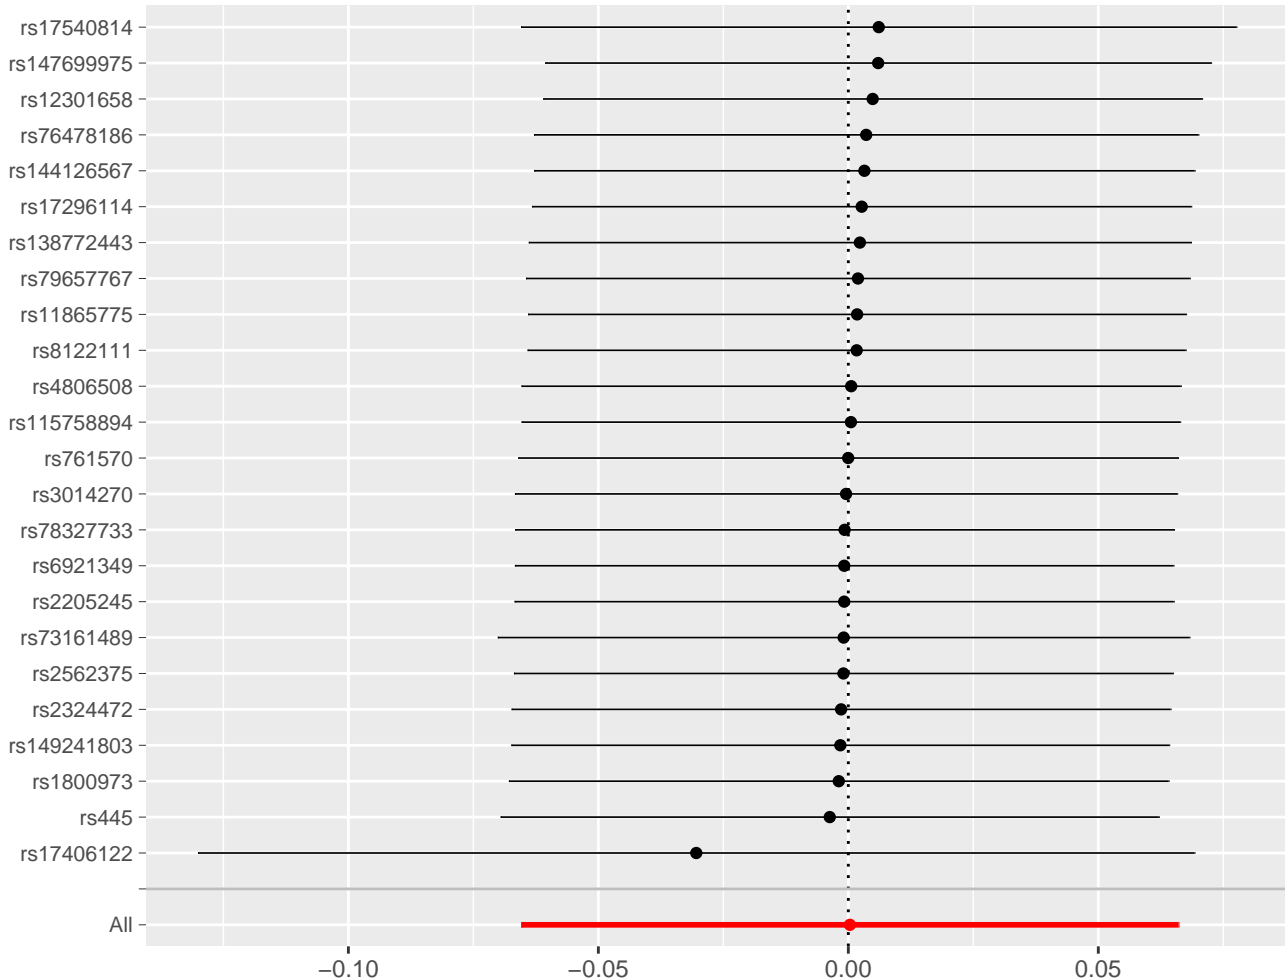

MR leave-one-out sensitivity analysis for 'CD14- CD16- AC' on 'Juvenile arthritis'



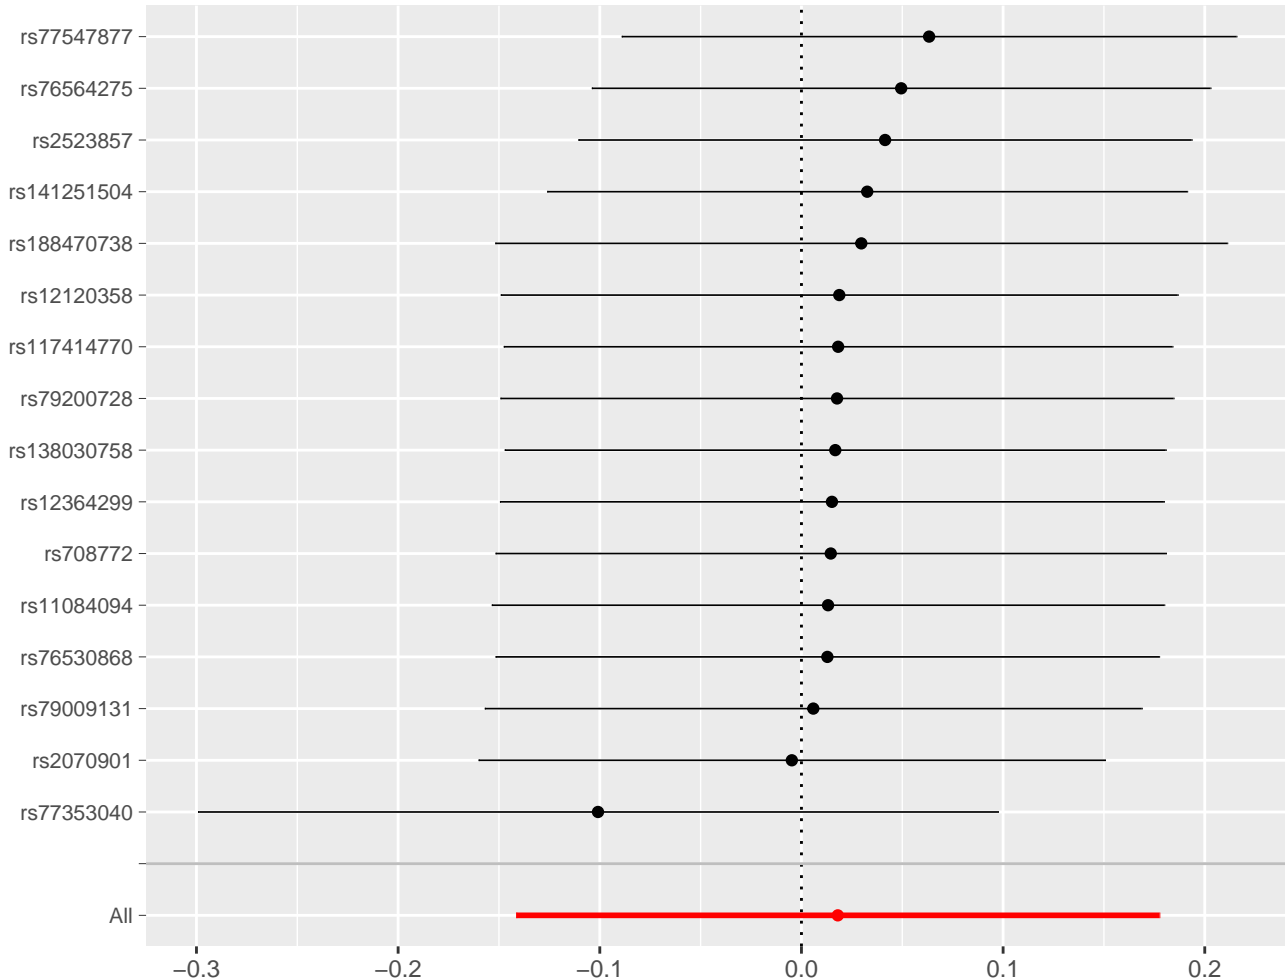

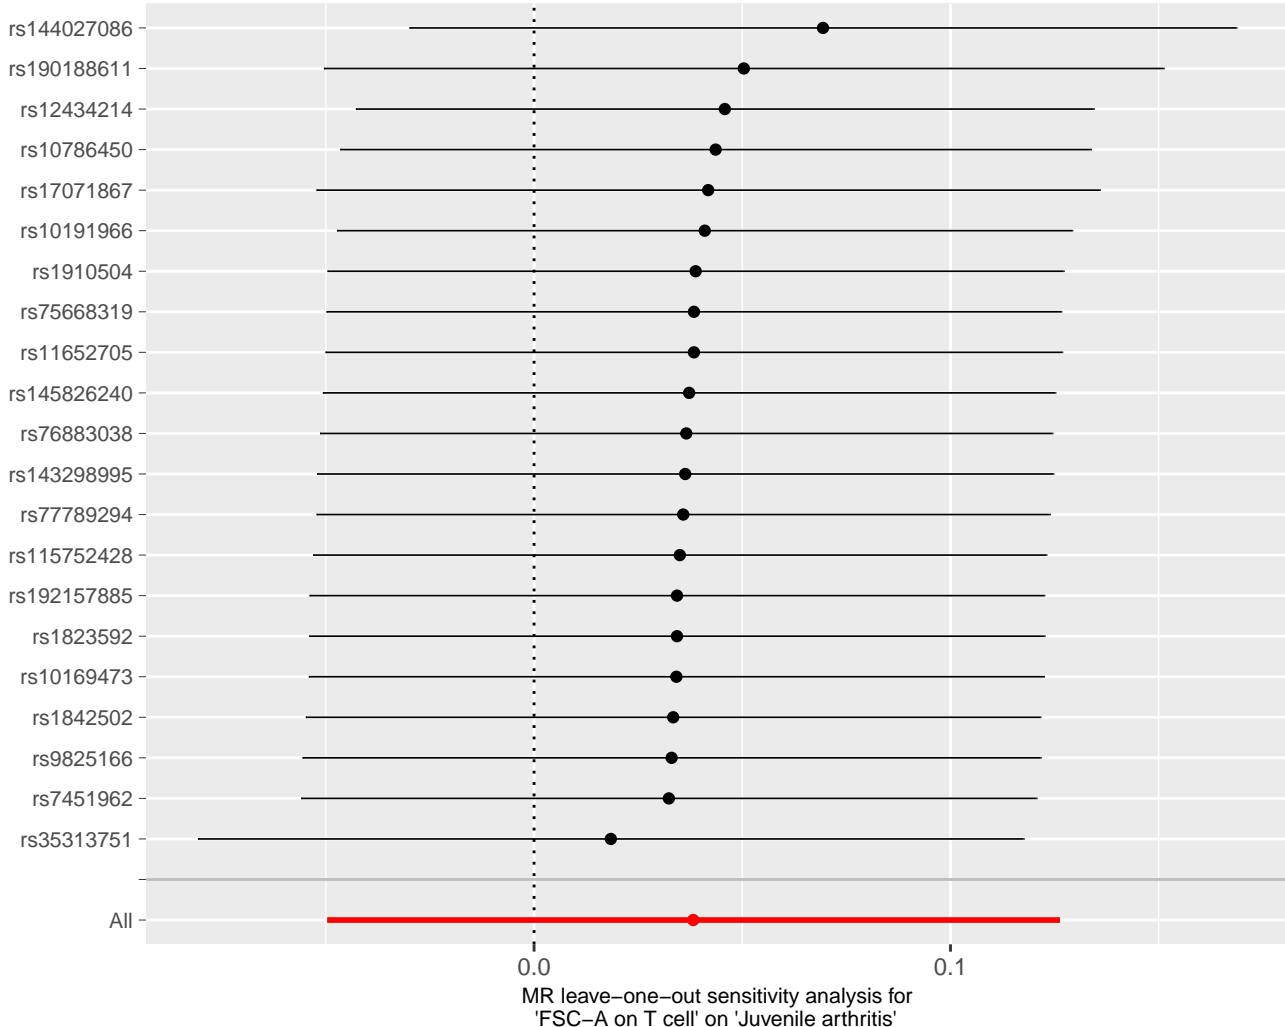

MR leave-one-out sensitivity analysis for 'FSC-A on T cell' on 'Juvenile arthritis'

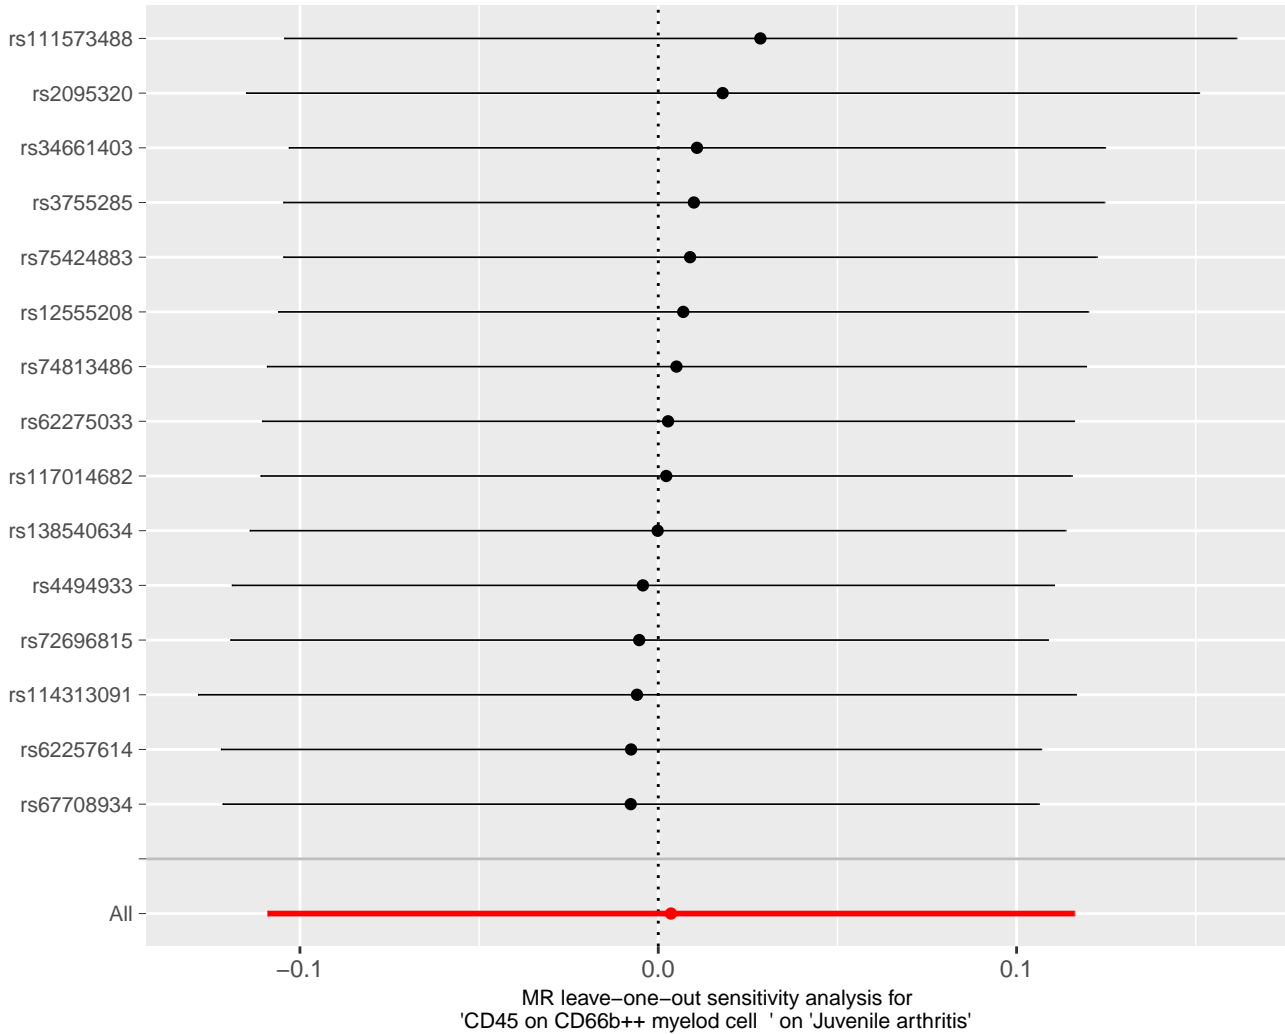

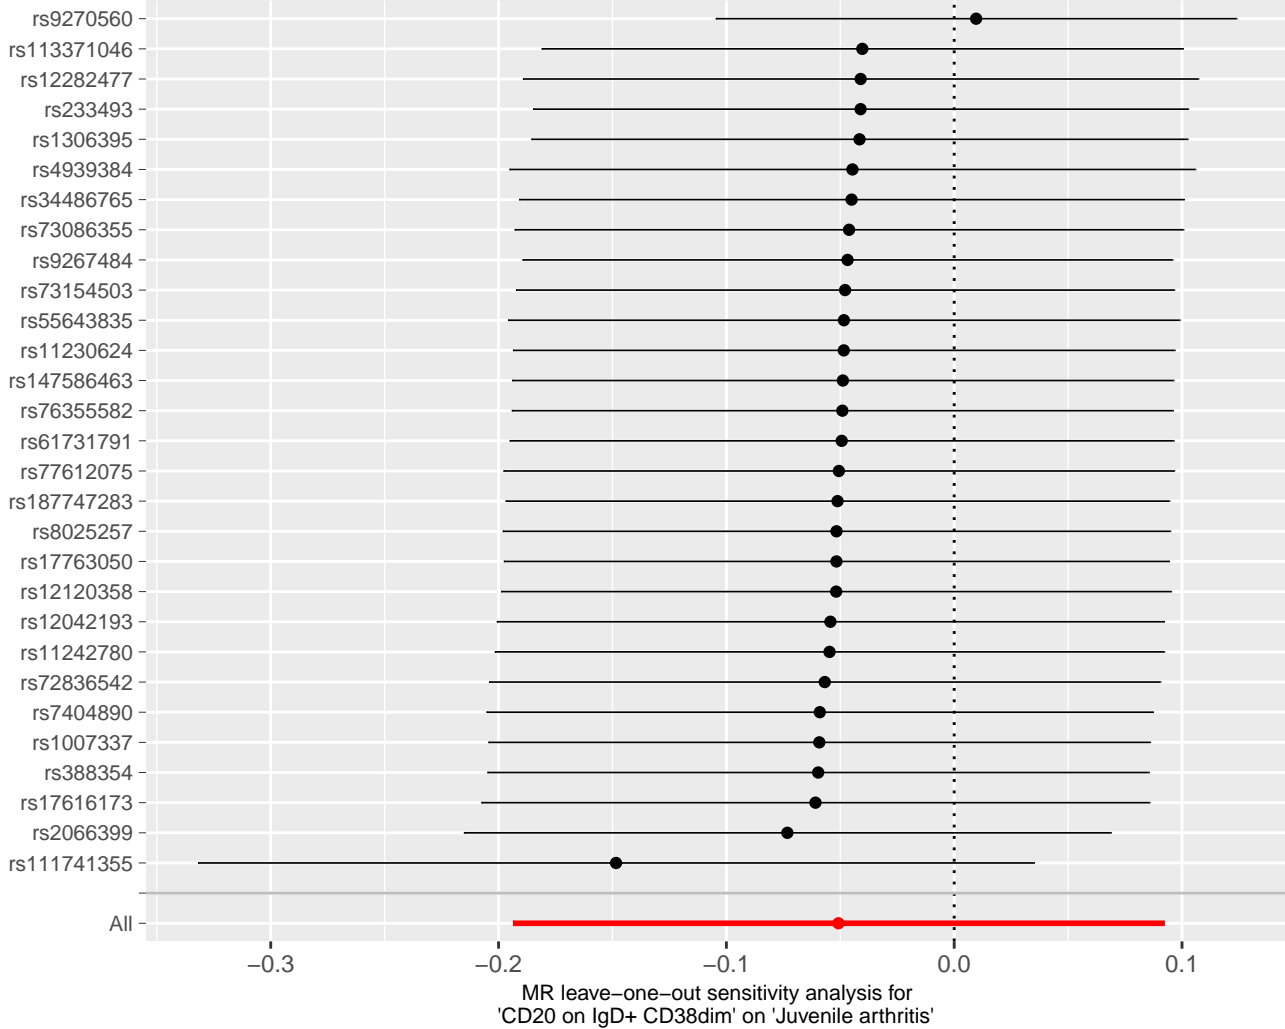

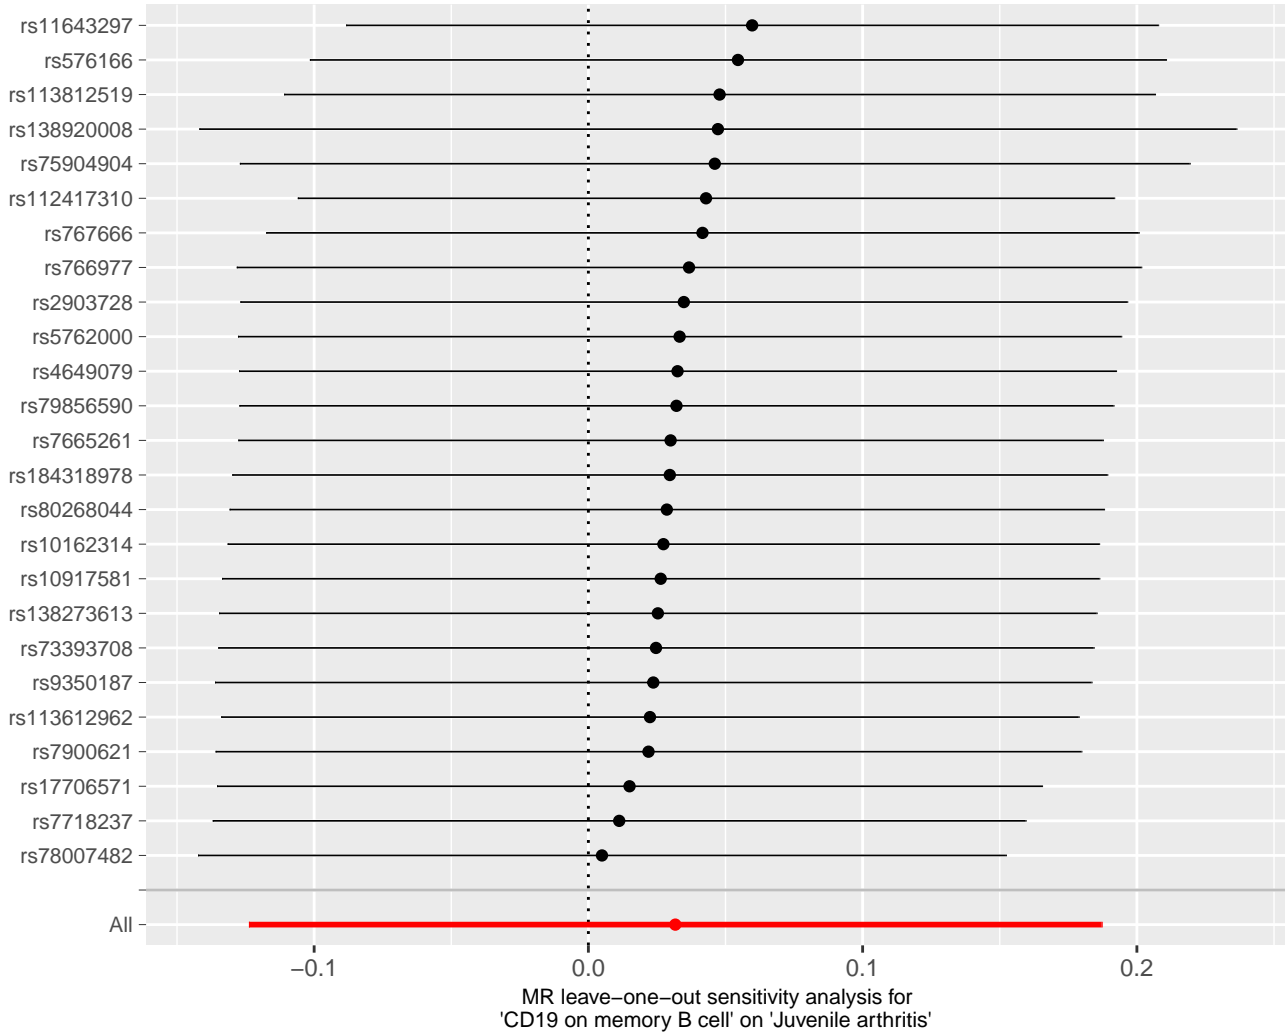

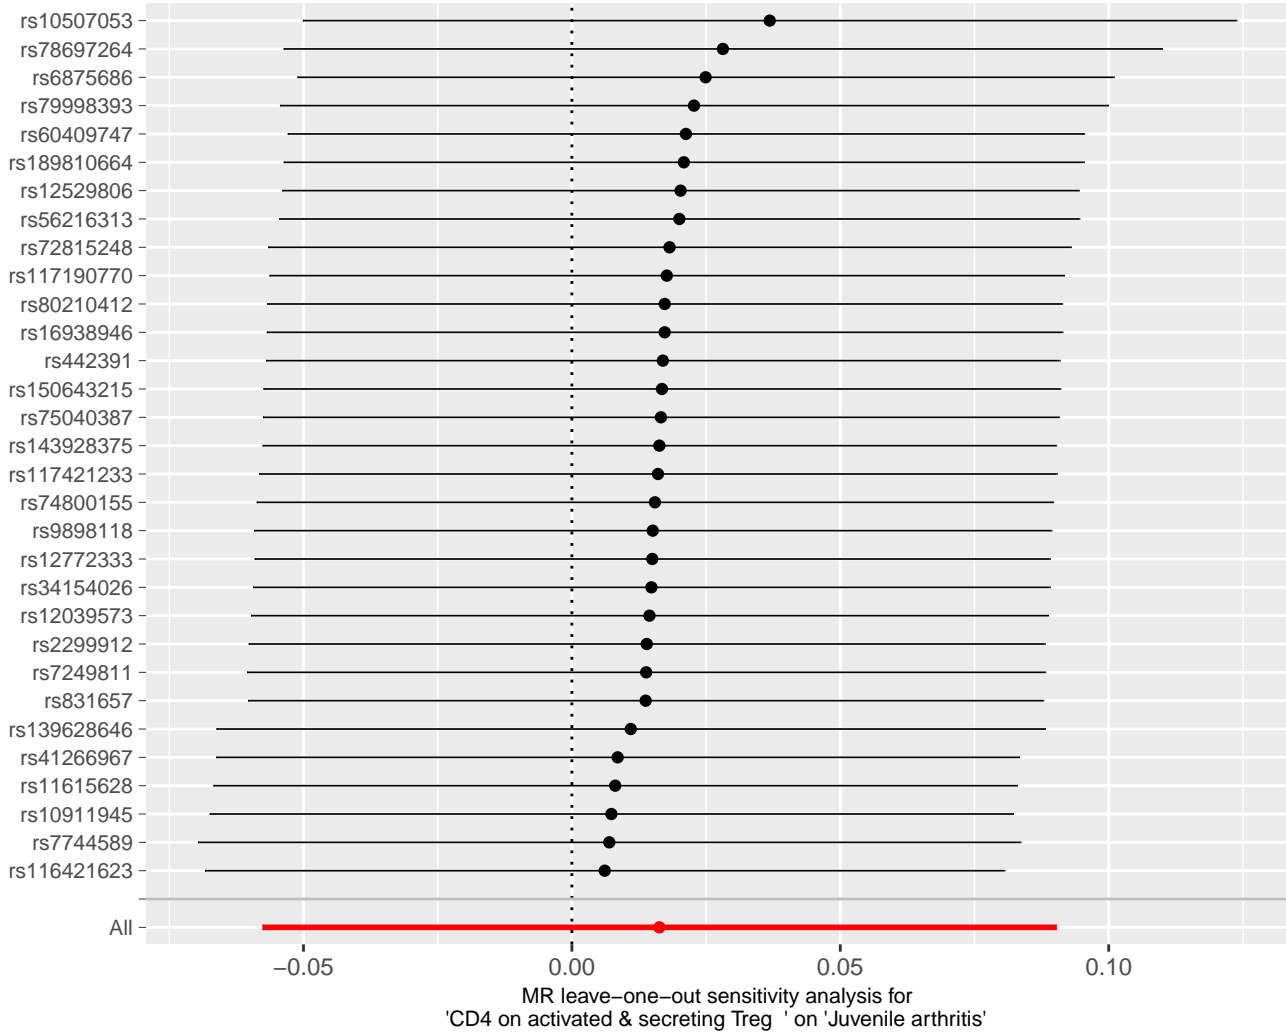

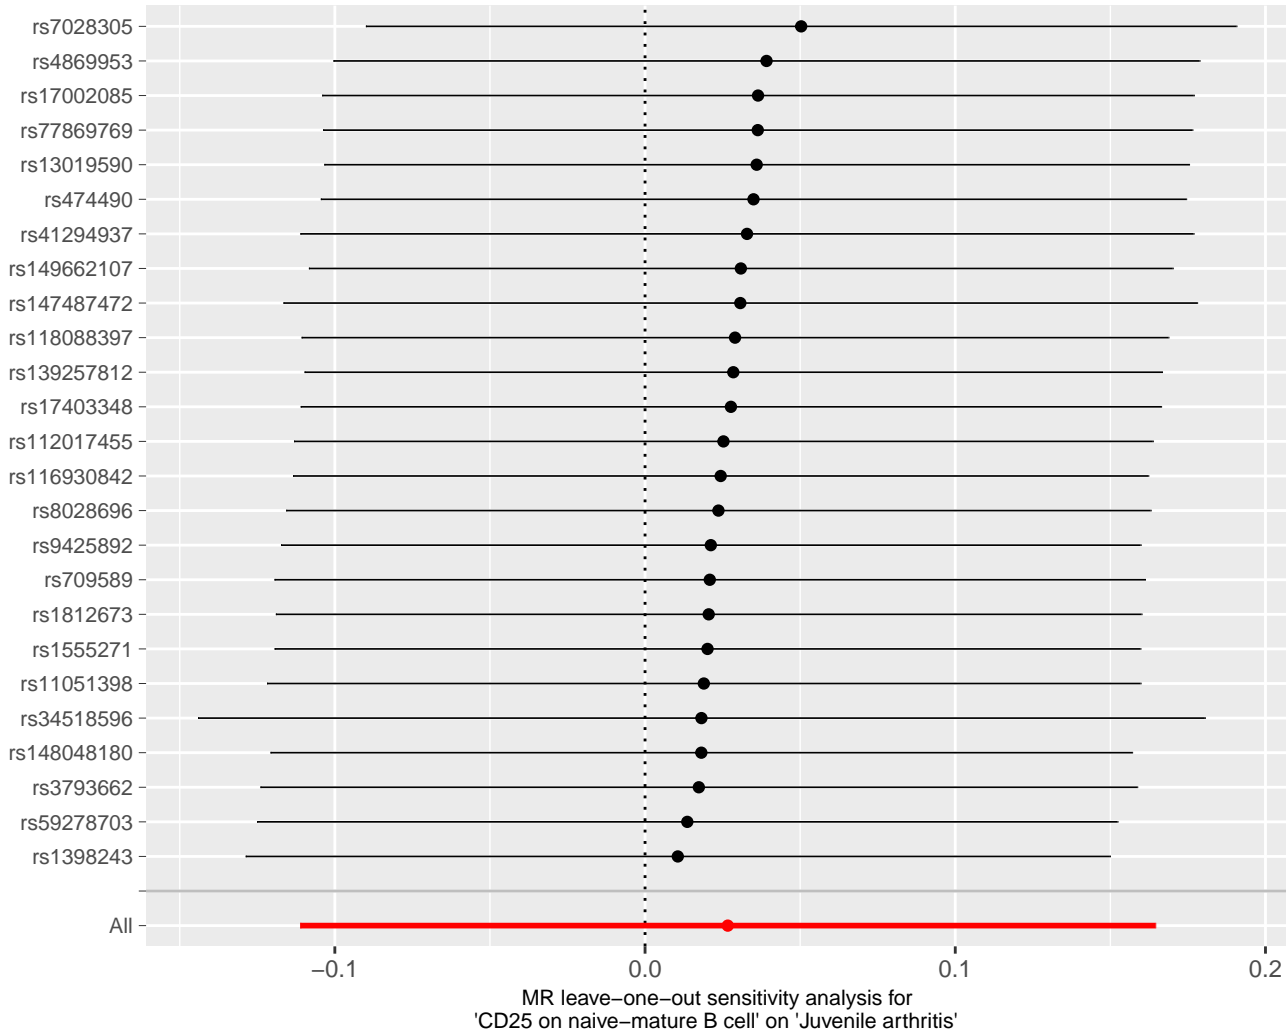

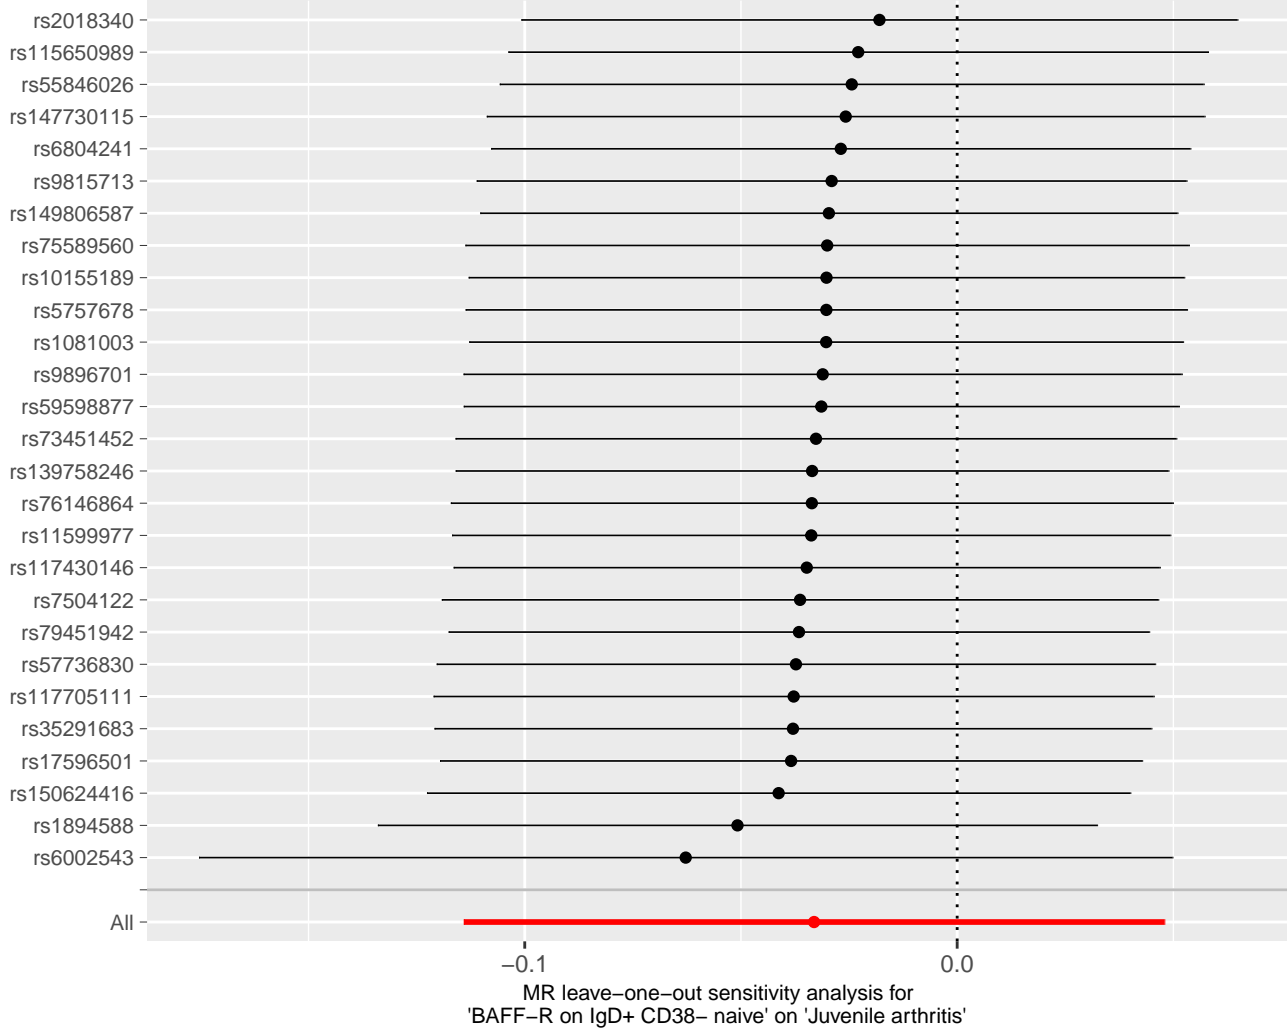



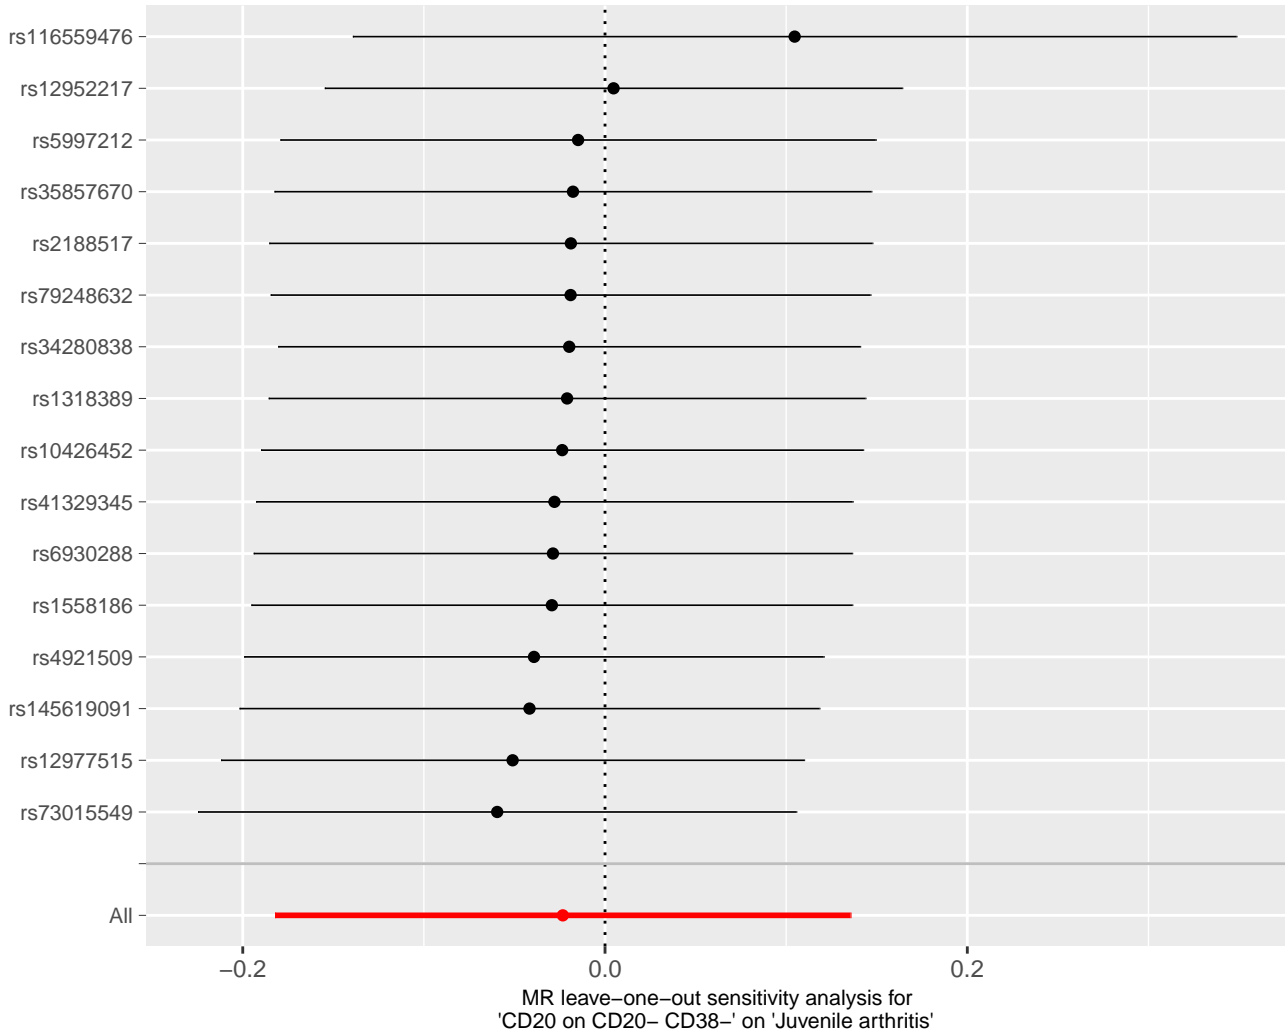

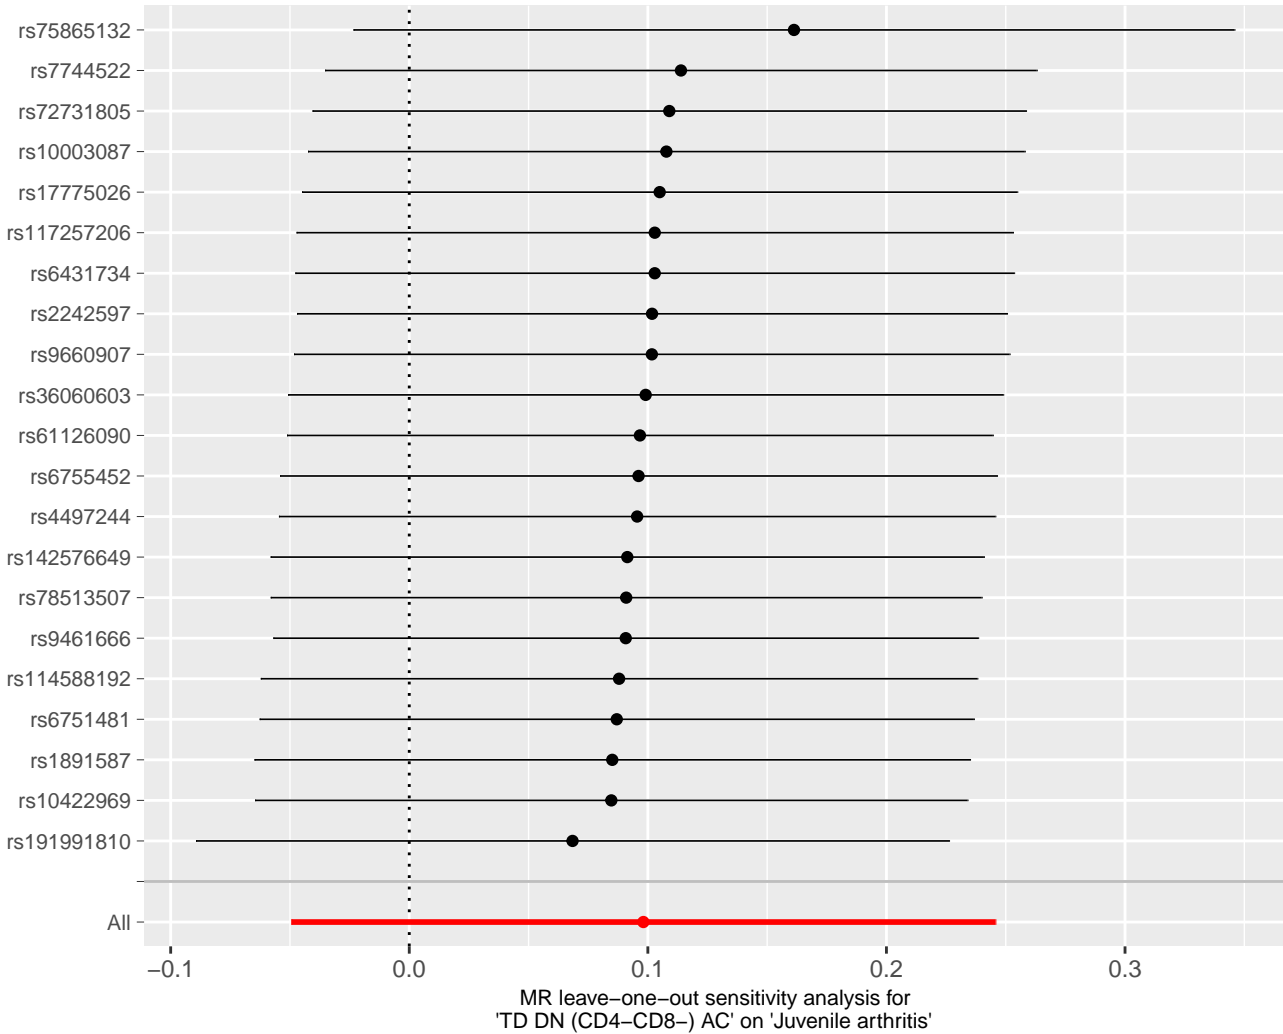

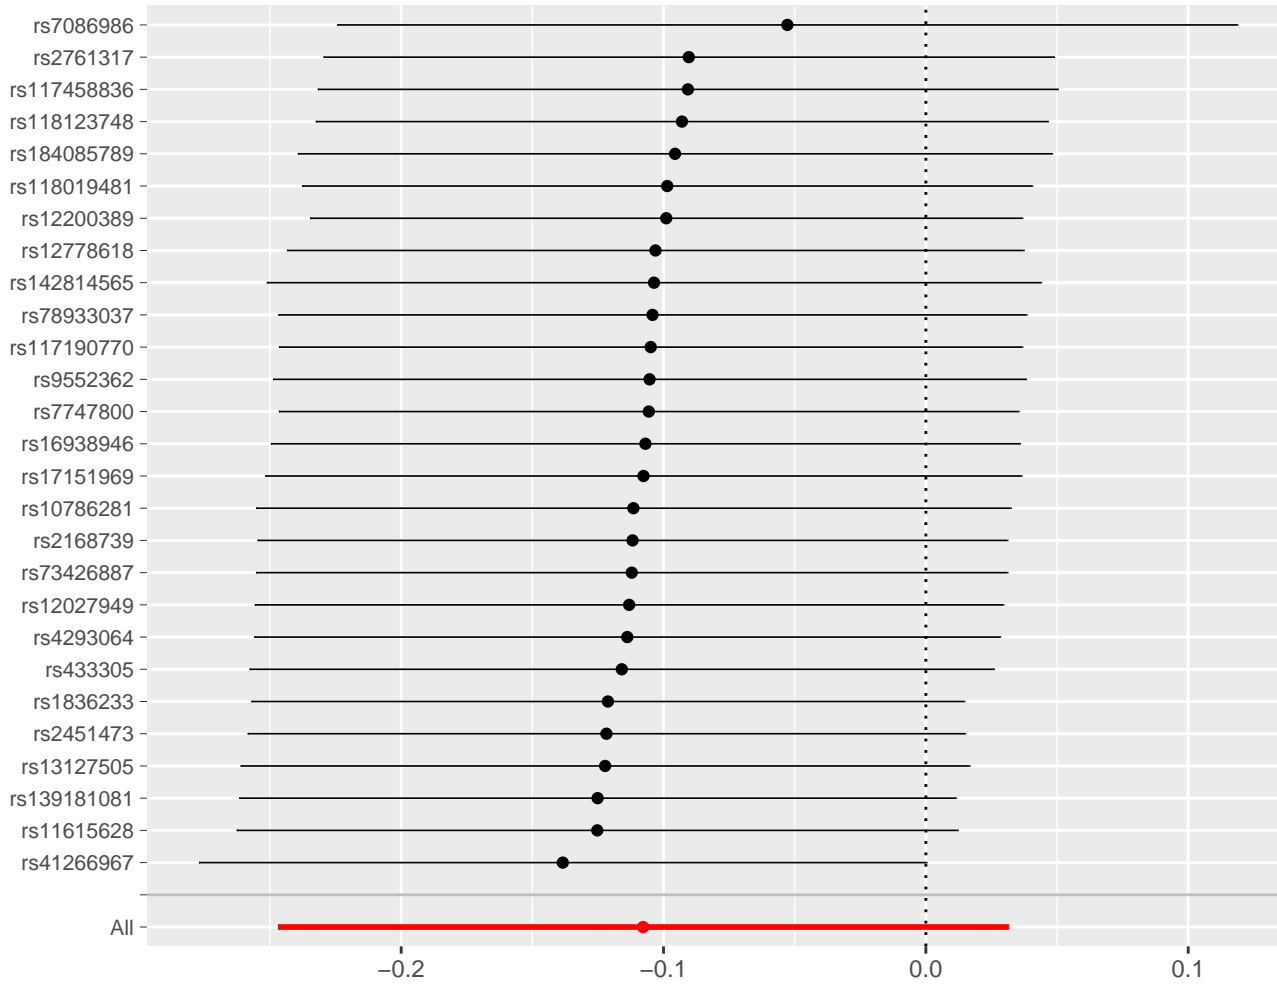

MR leave-one-out sensitivity analysis for 'CD4 on CD39+ CD4+ ' on 'Juvenile arthritis'

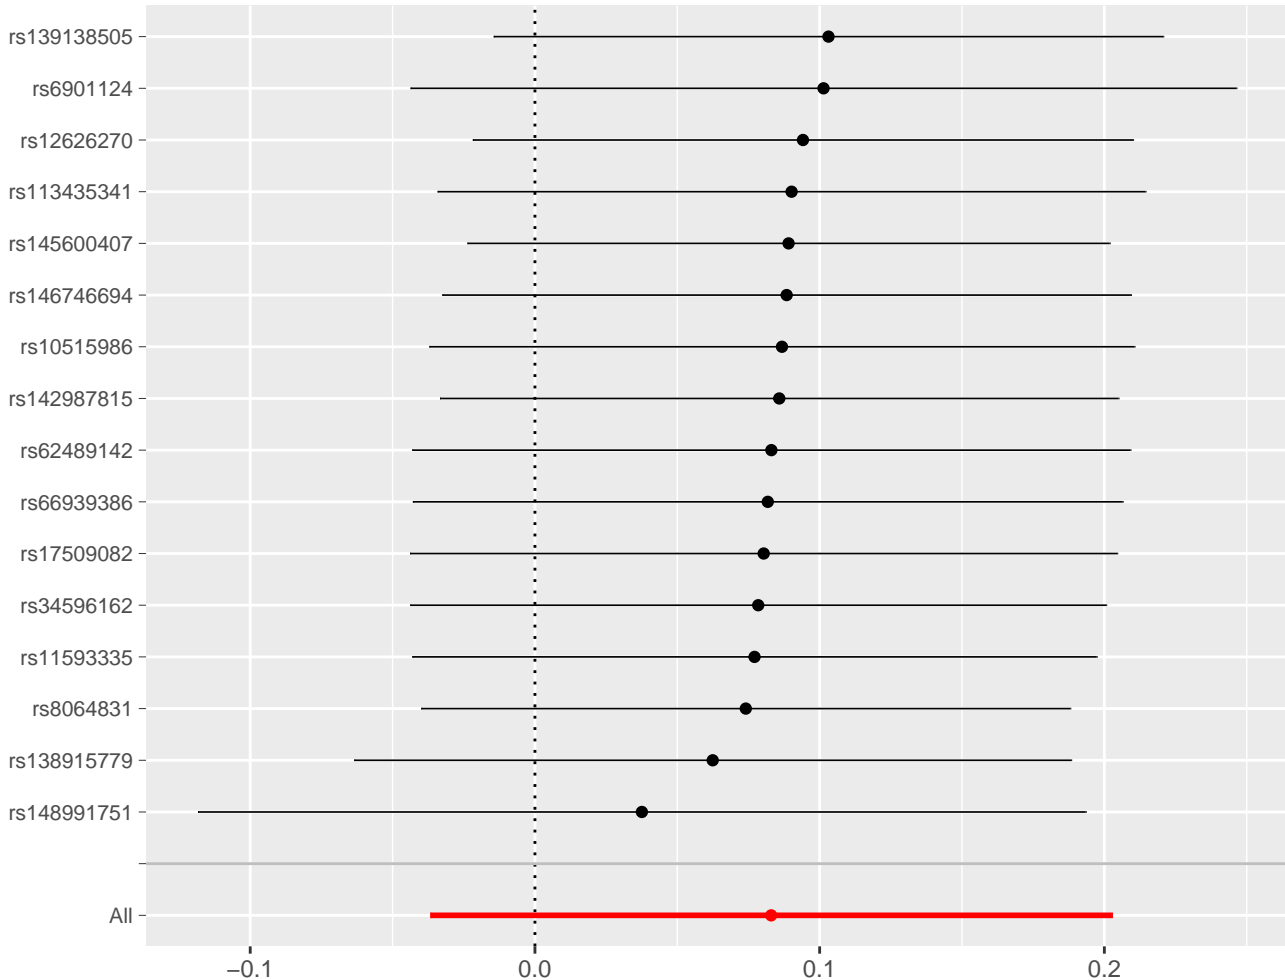

MR leave-one-out sensitivity analysis for 'Activated Treg AC' on 'Juvenile arthritis'

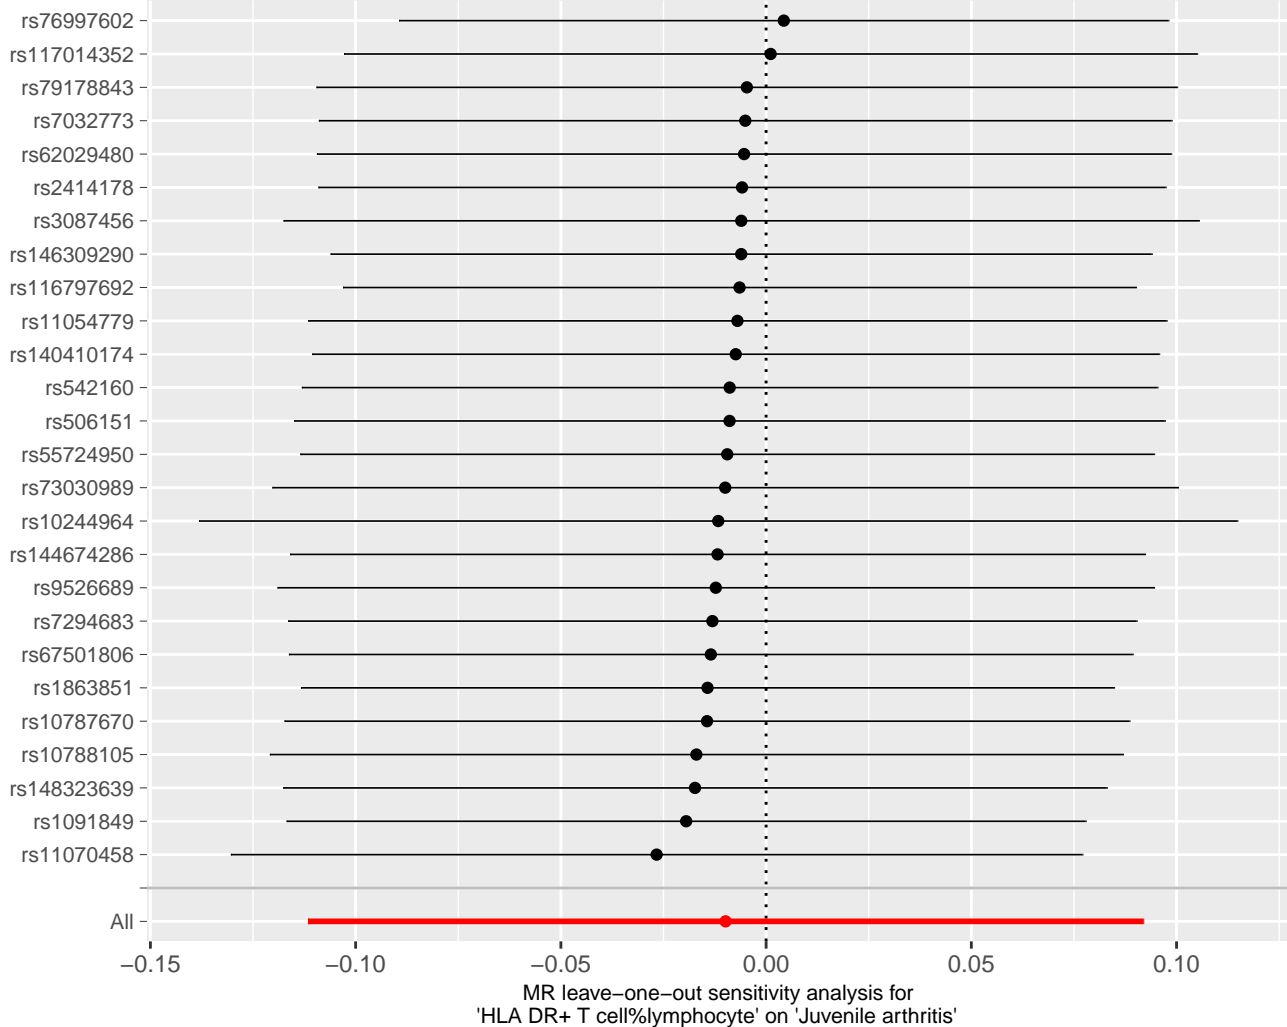

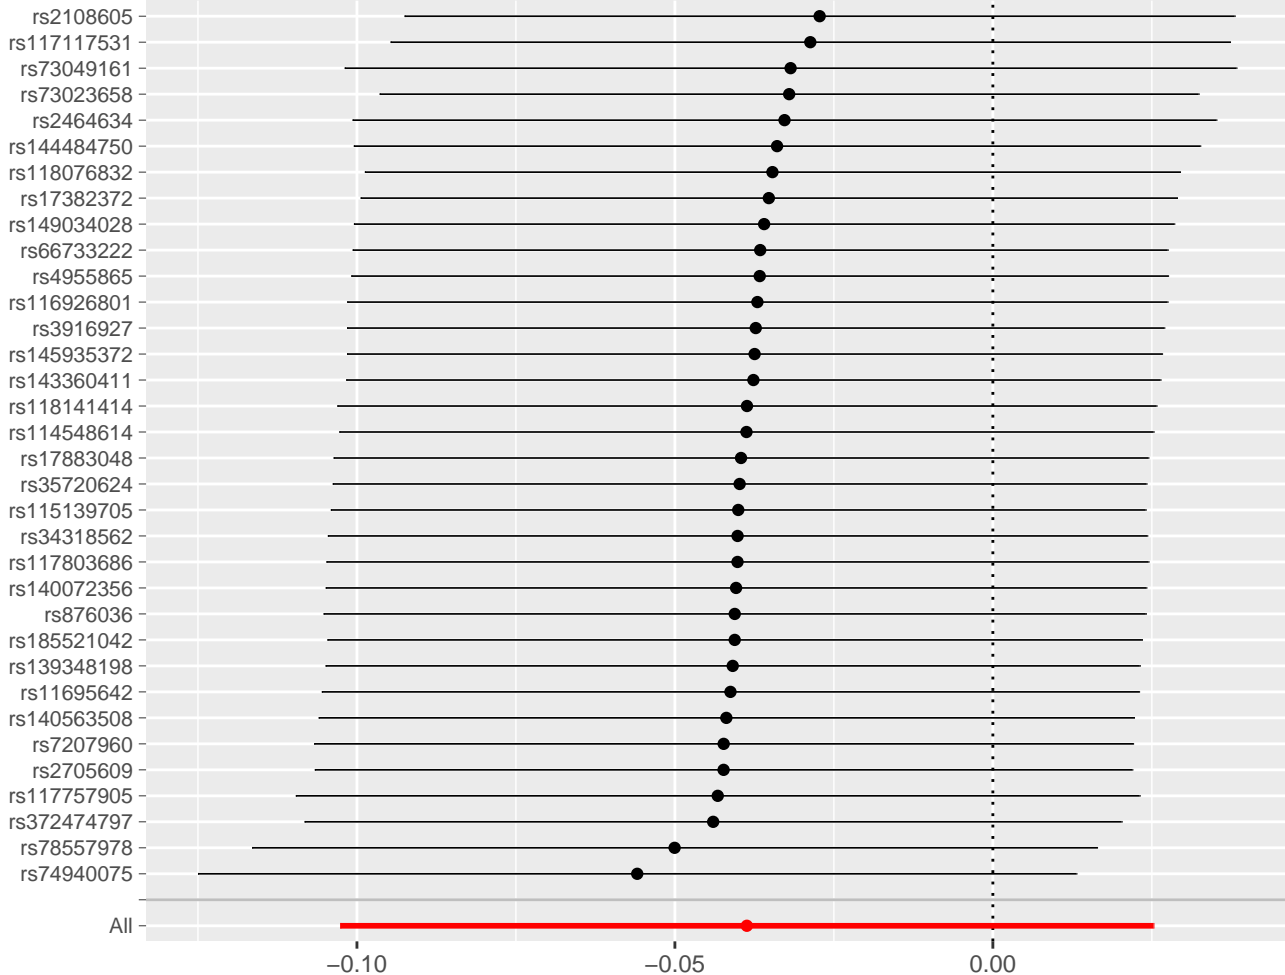

MR leave-one-out sensitivity analysis for 'CD33- HLA DR+ AC' on 'Juvenile arthritis'

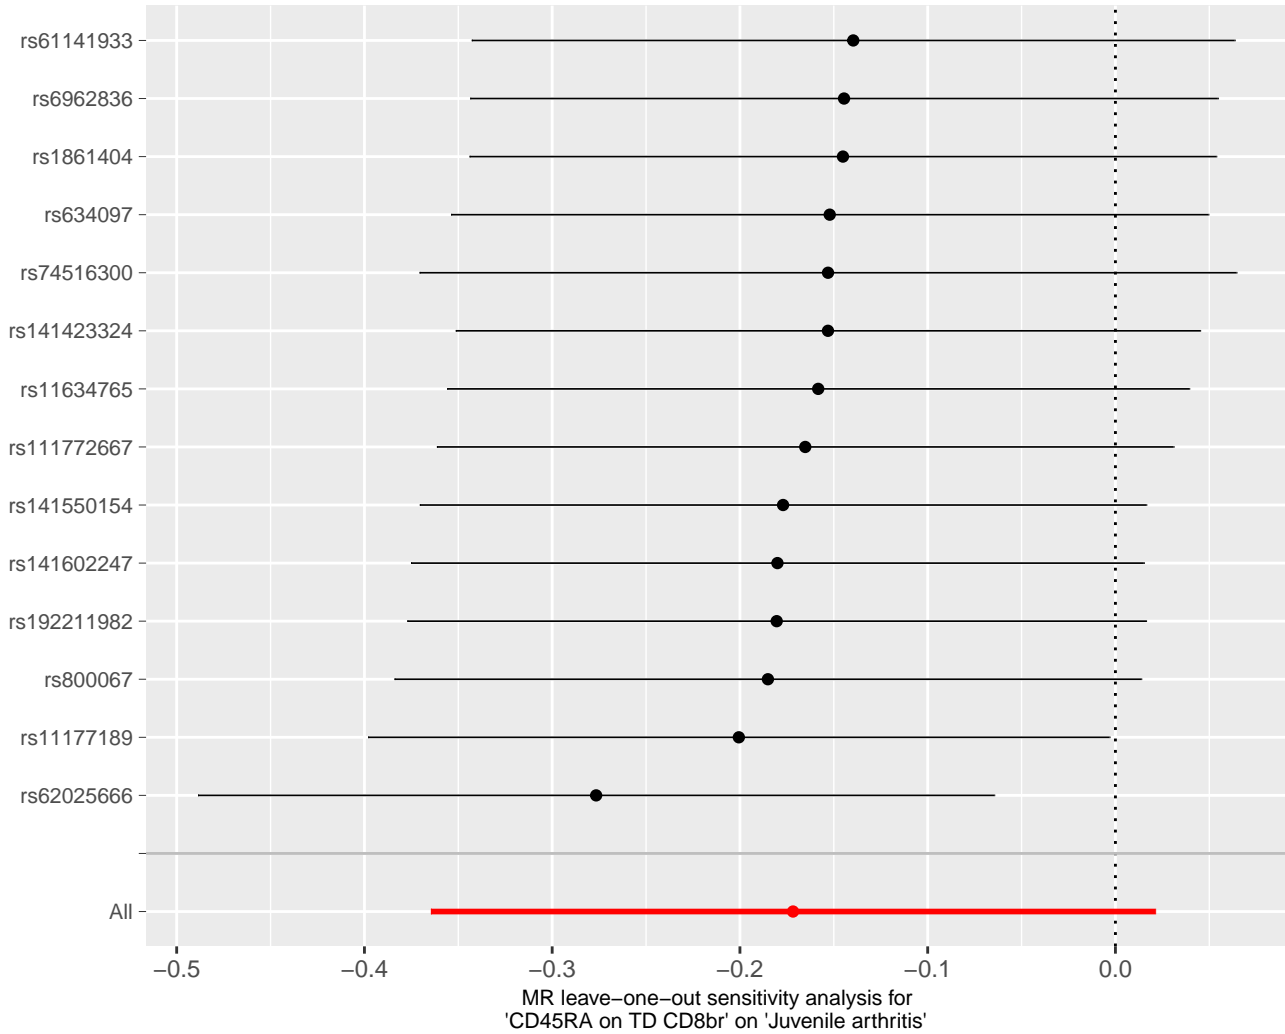

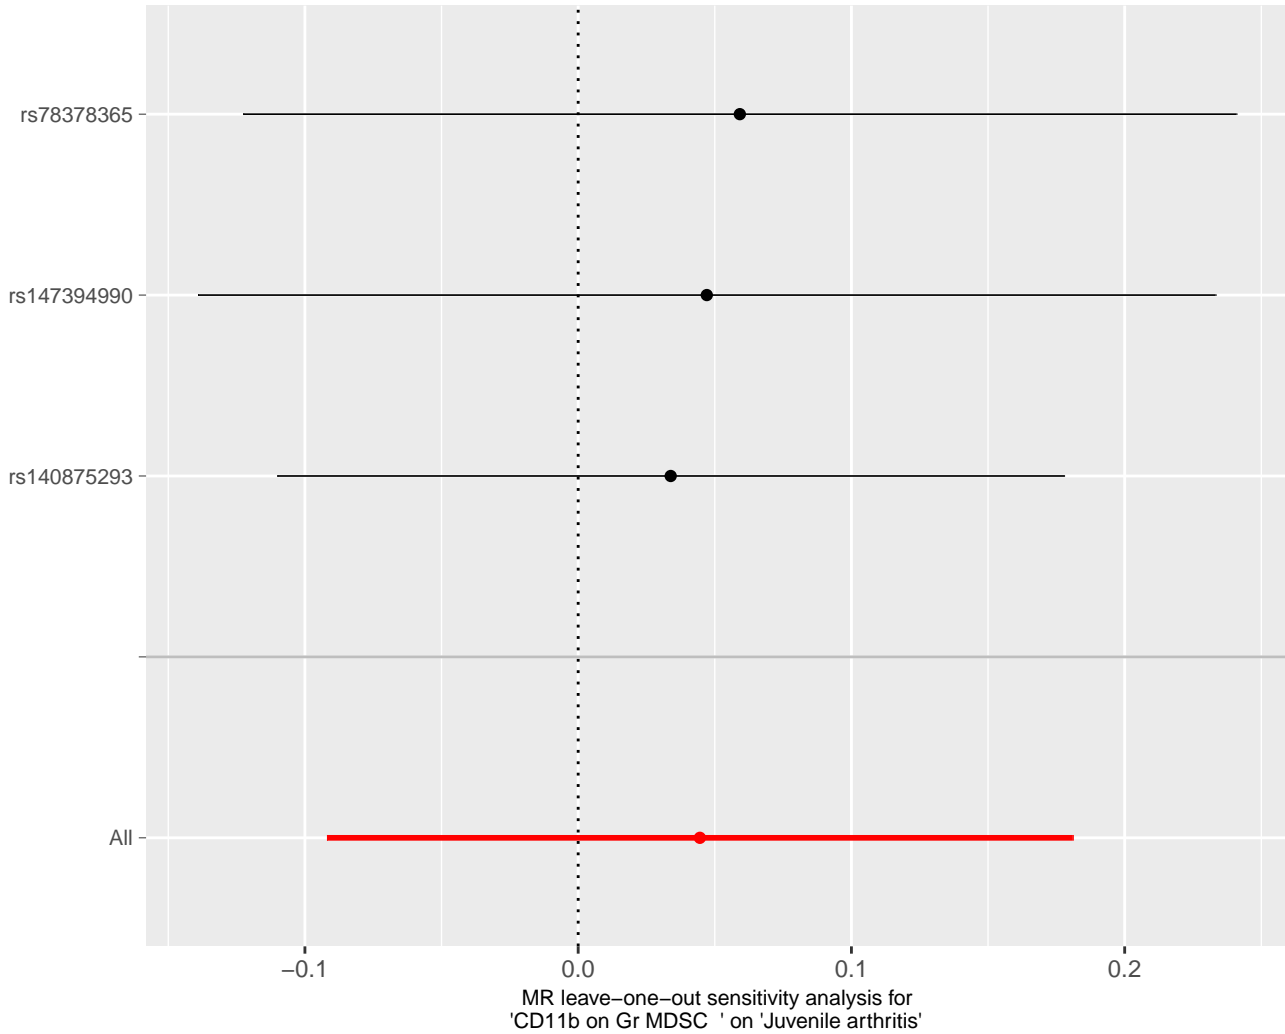



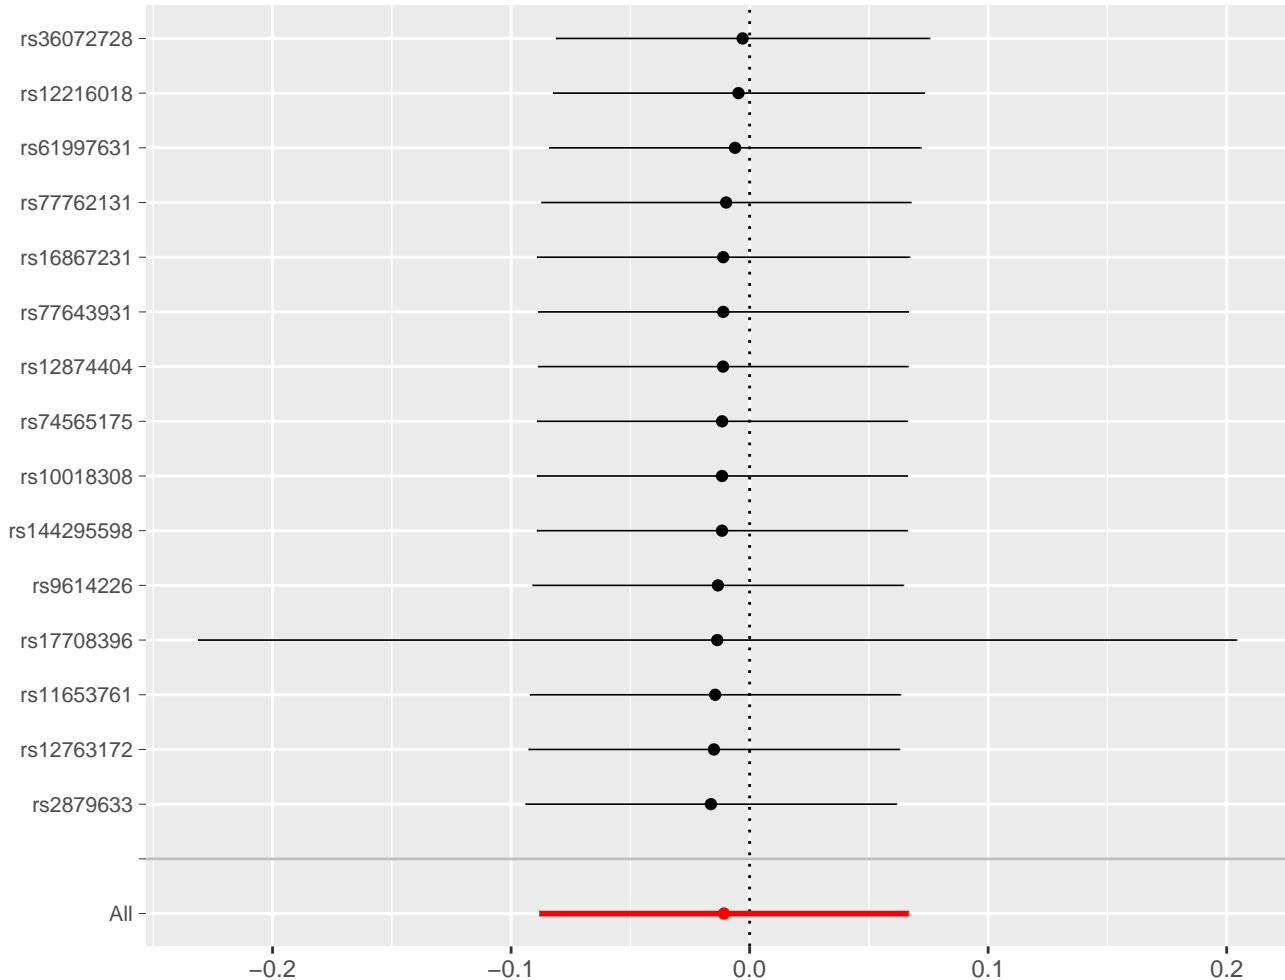

MR leave-one-out sensitivity analysis for 'Memory B cell AC' on 'Juvenile arthritis'

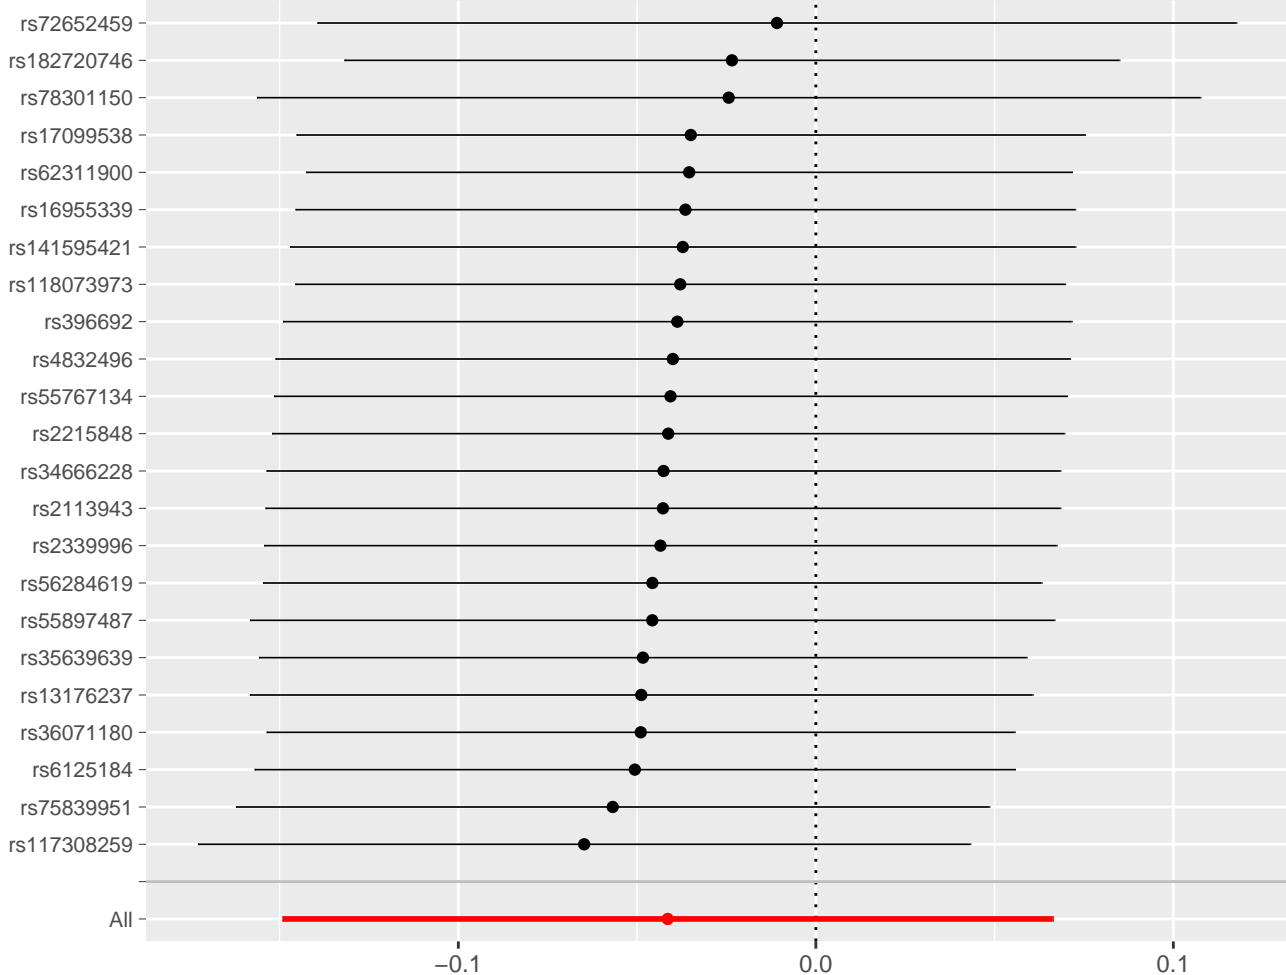

MR leave-one-out sensitivity analysis for 'CD20- CD38- %B cell' on 'Juvenile arthritis'

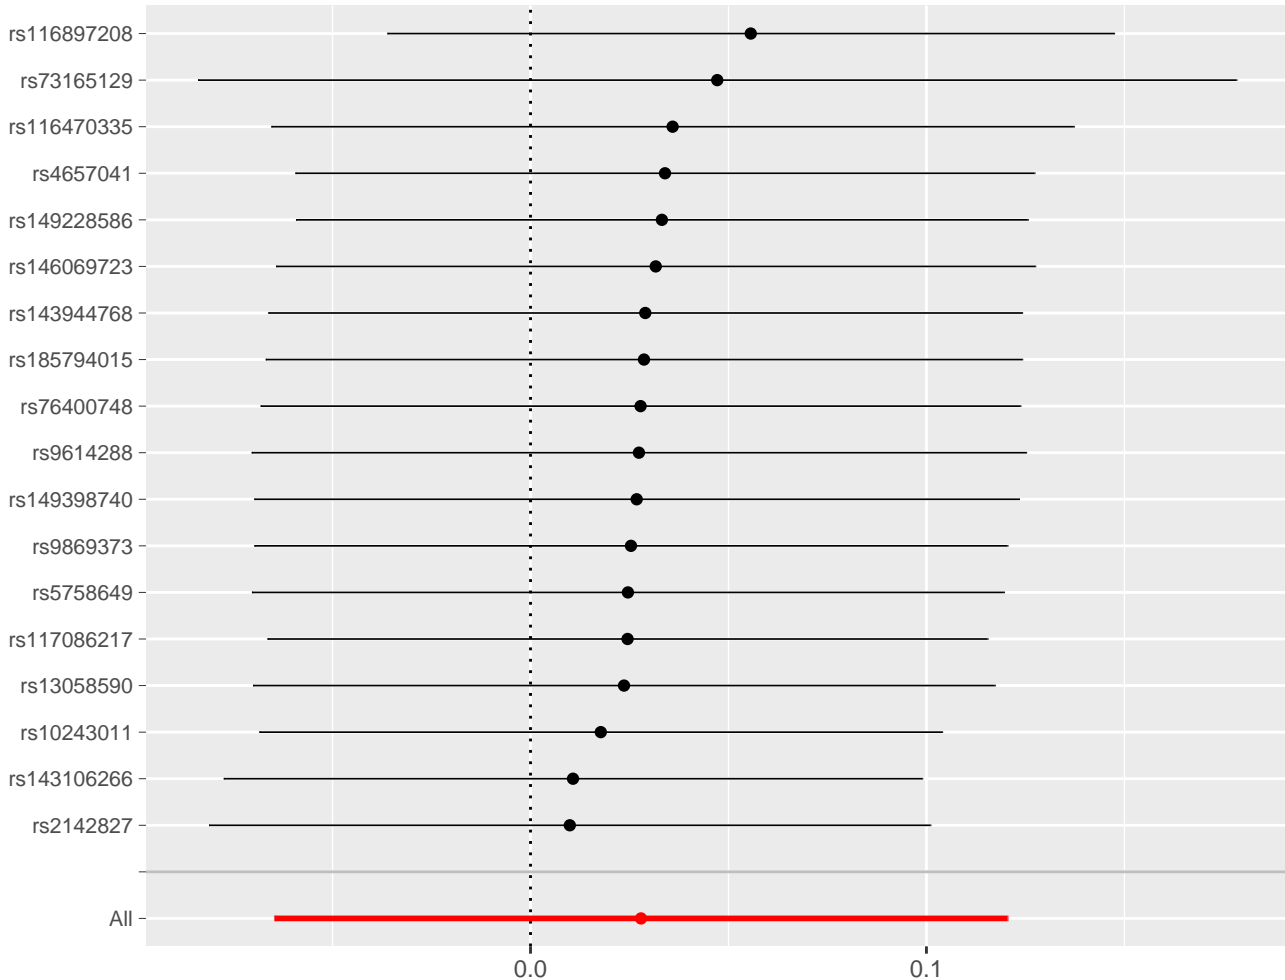

MR leave-one-out sensitivity analysis for 'BAFF-R on sw mem' on 'Juvenile arthritis'

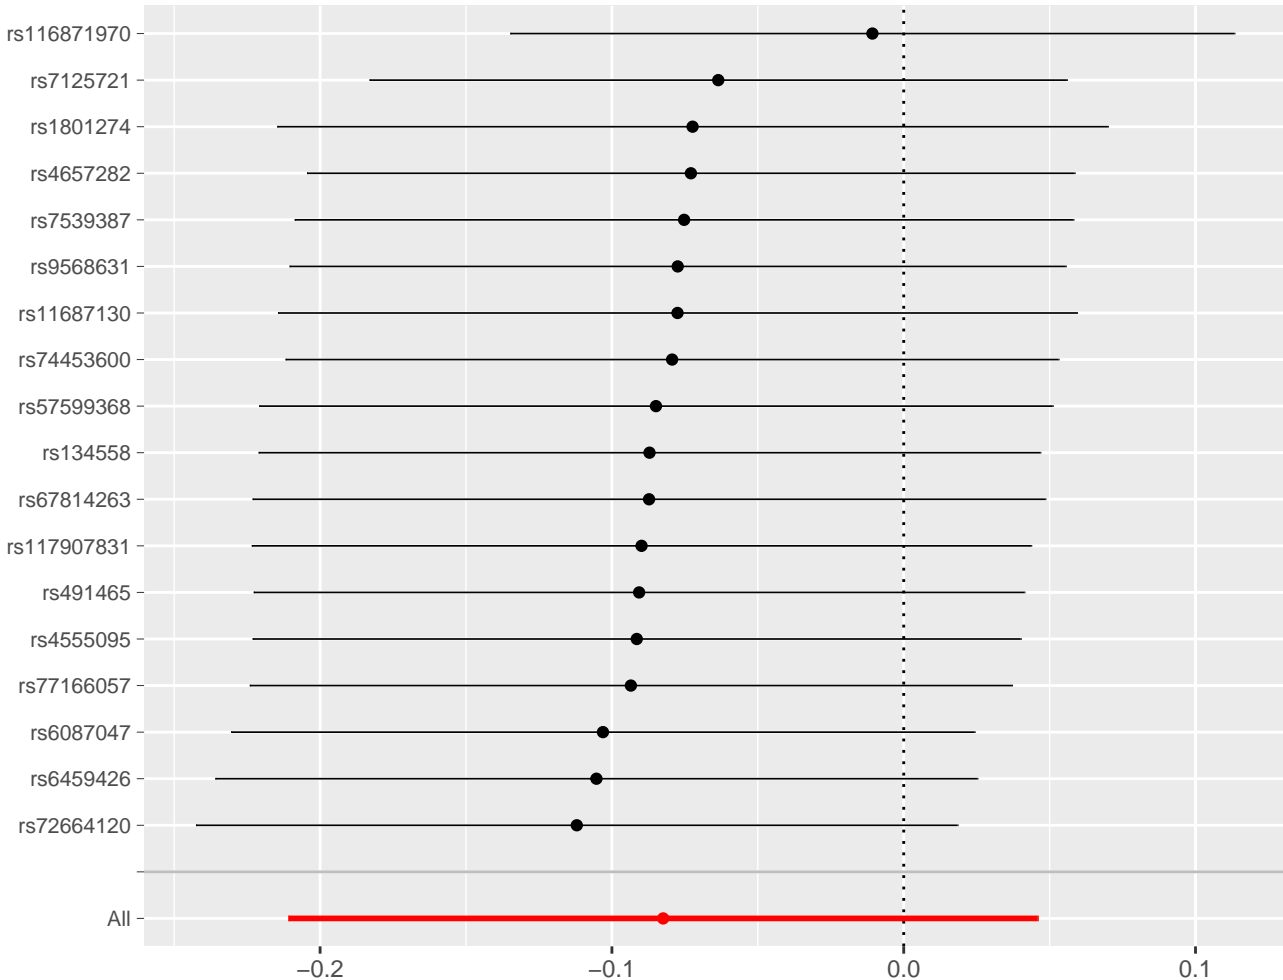

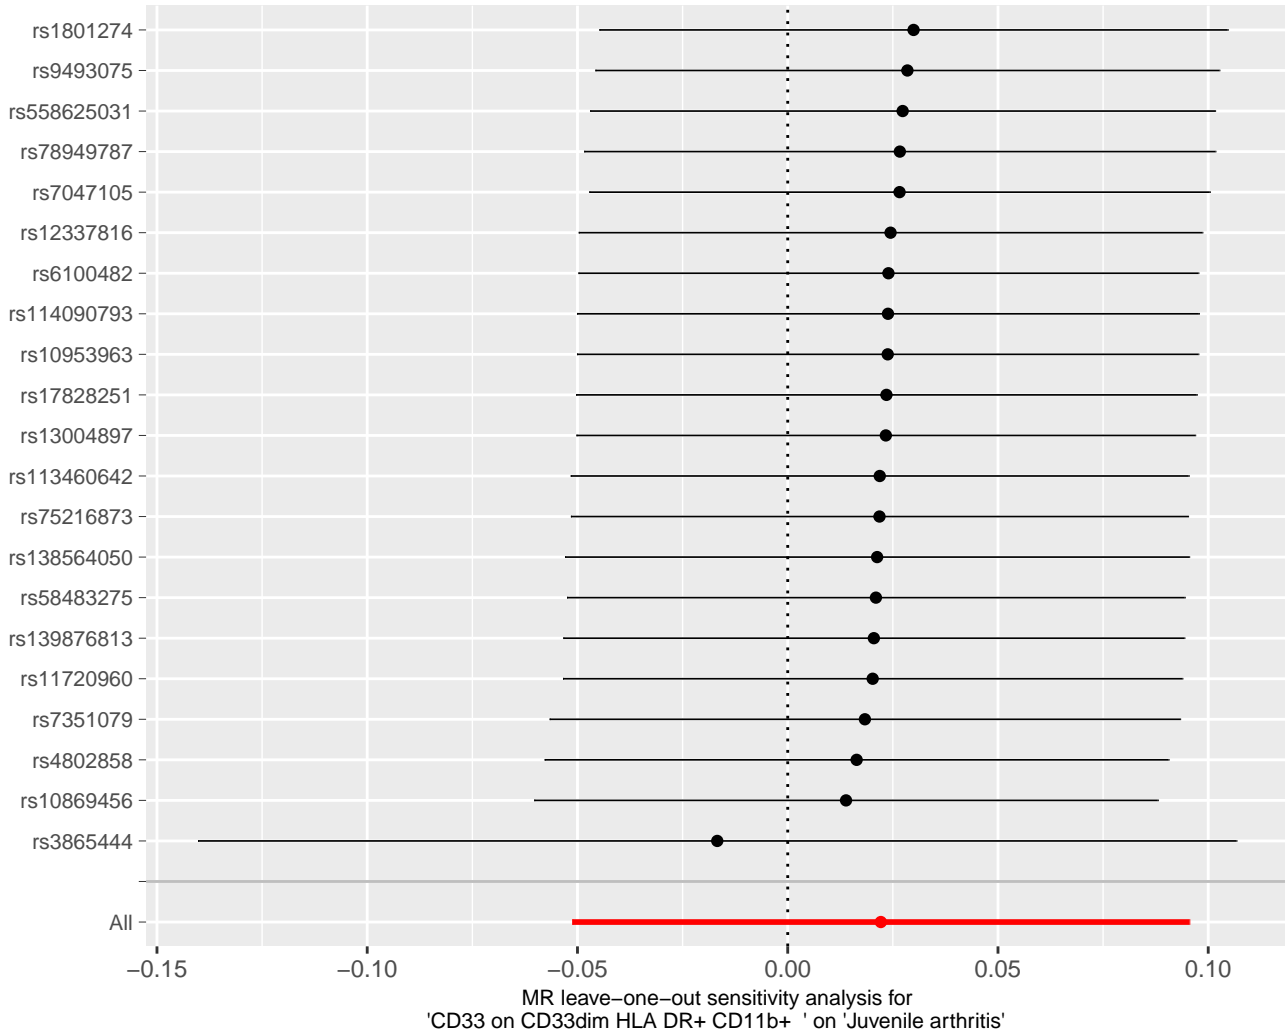

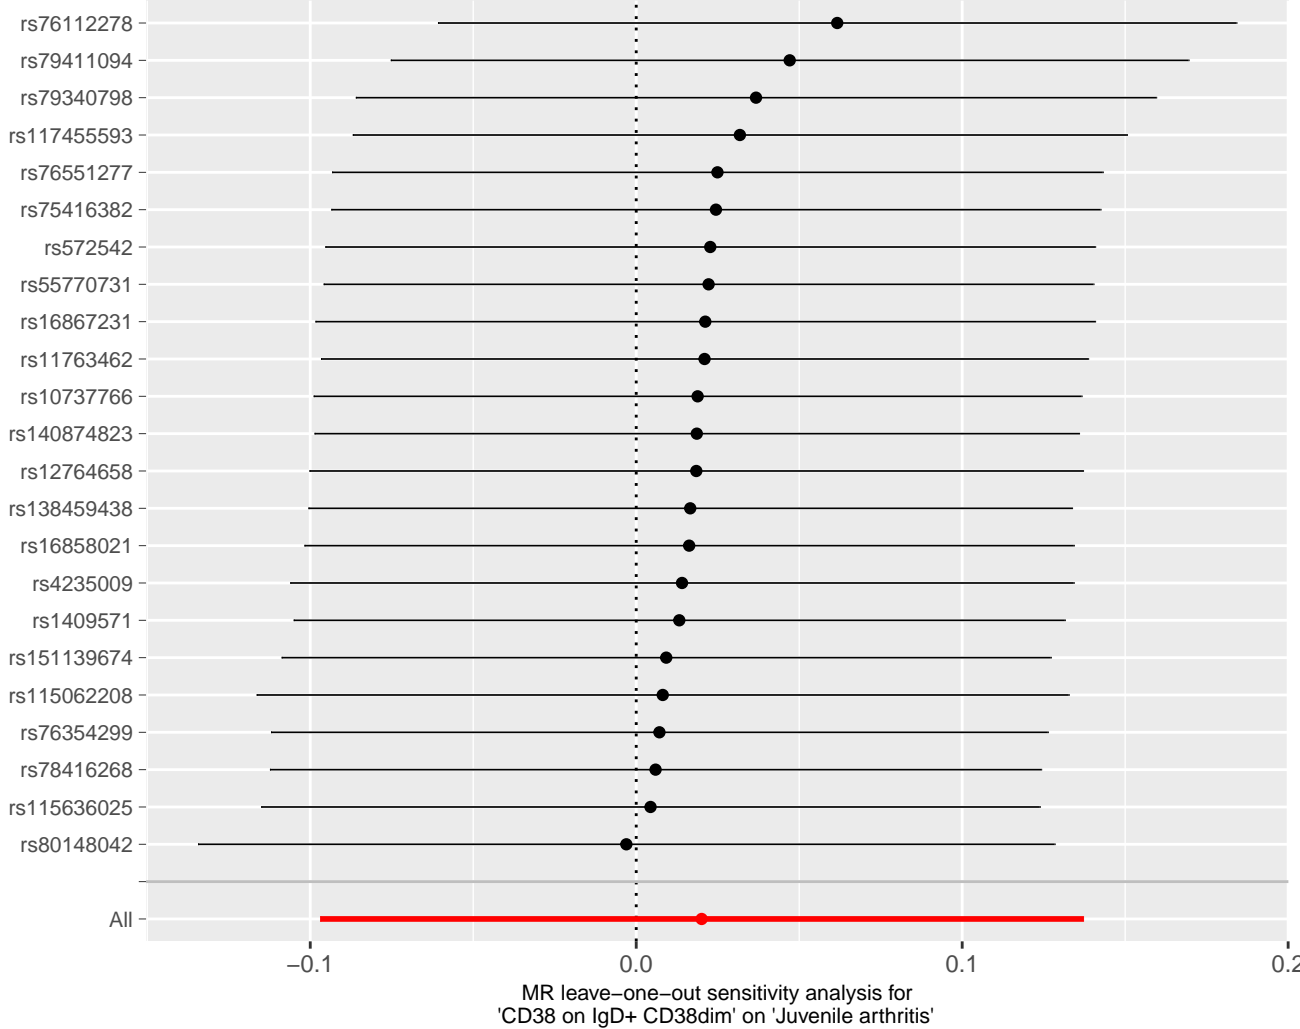

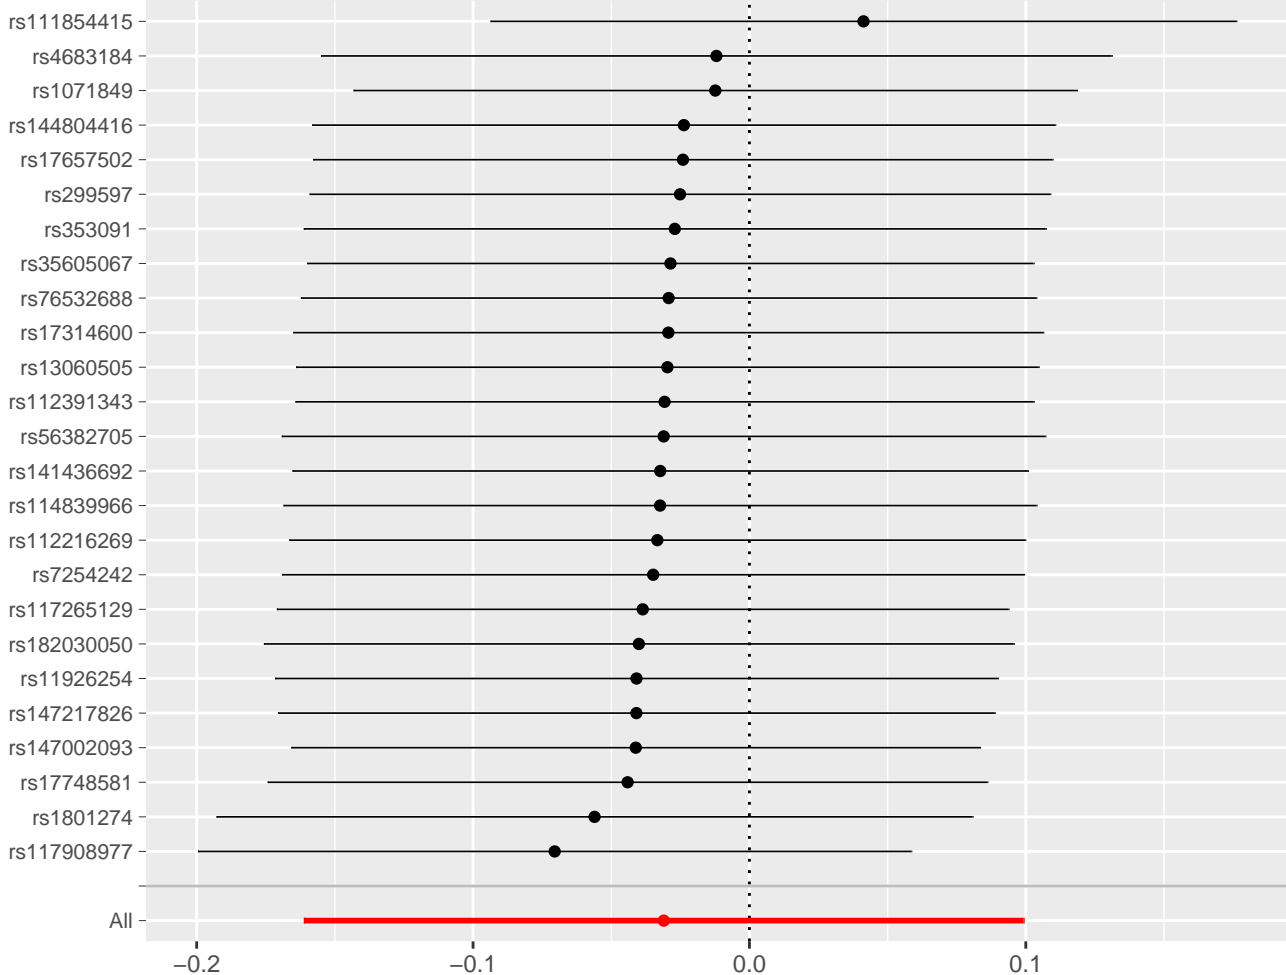

MR leave-one-out sensitivity analysis for 'CCR2 on monocyte' on 'Juvenile arthritis'

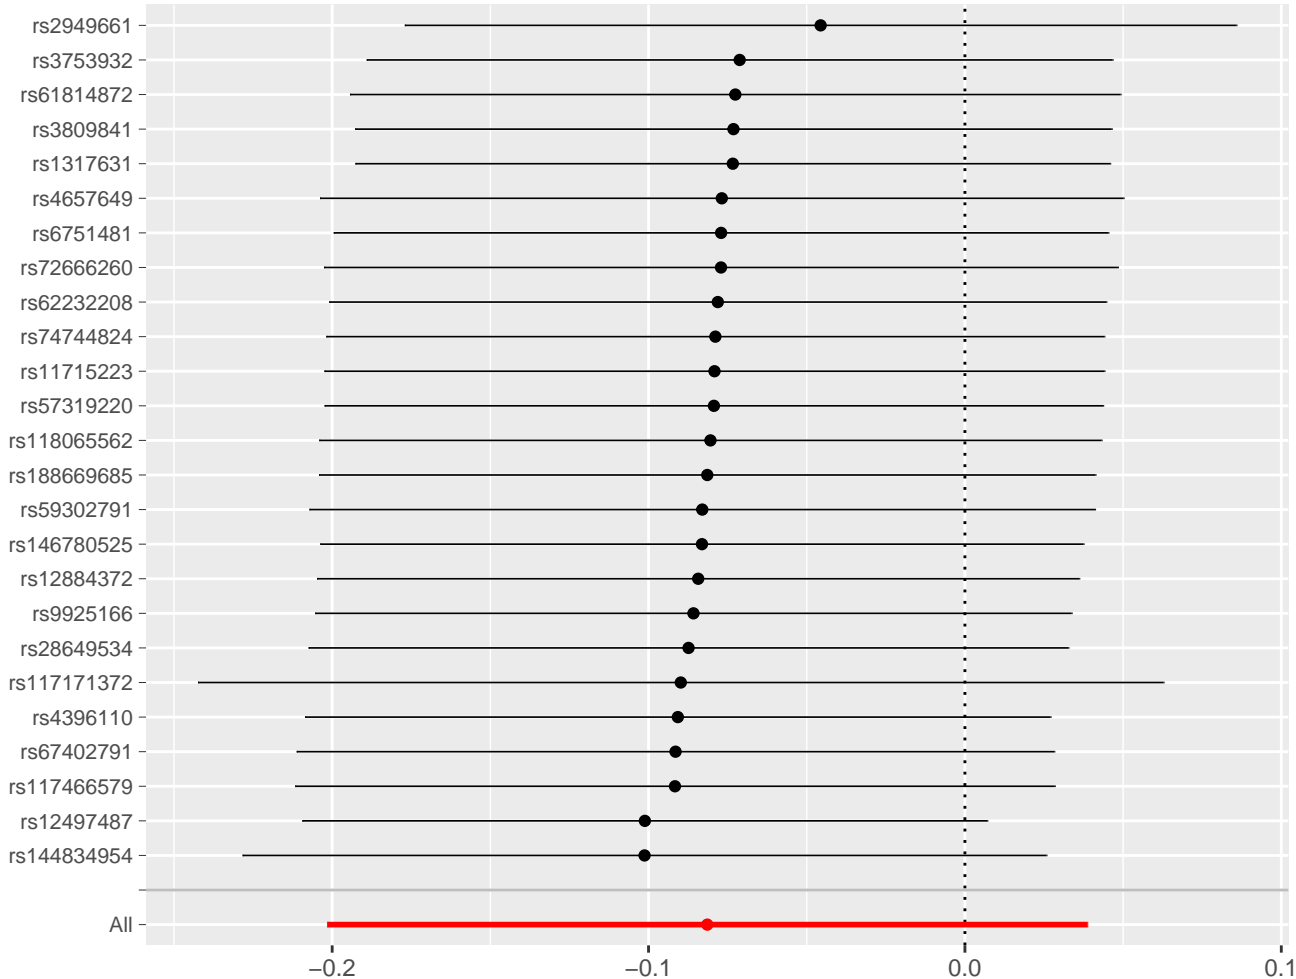



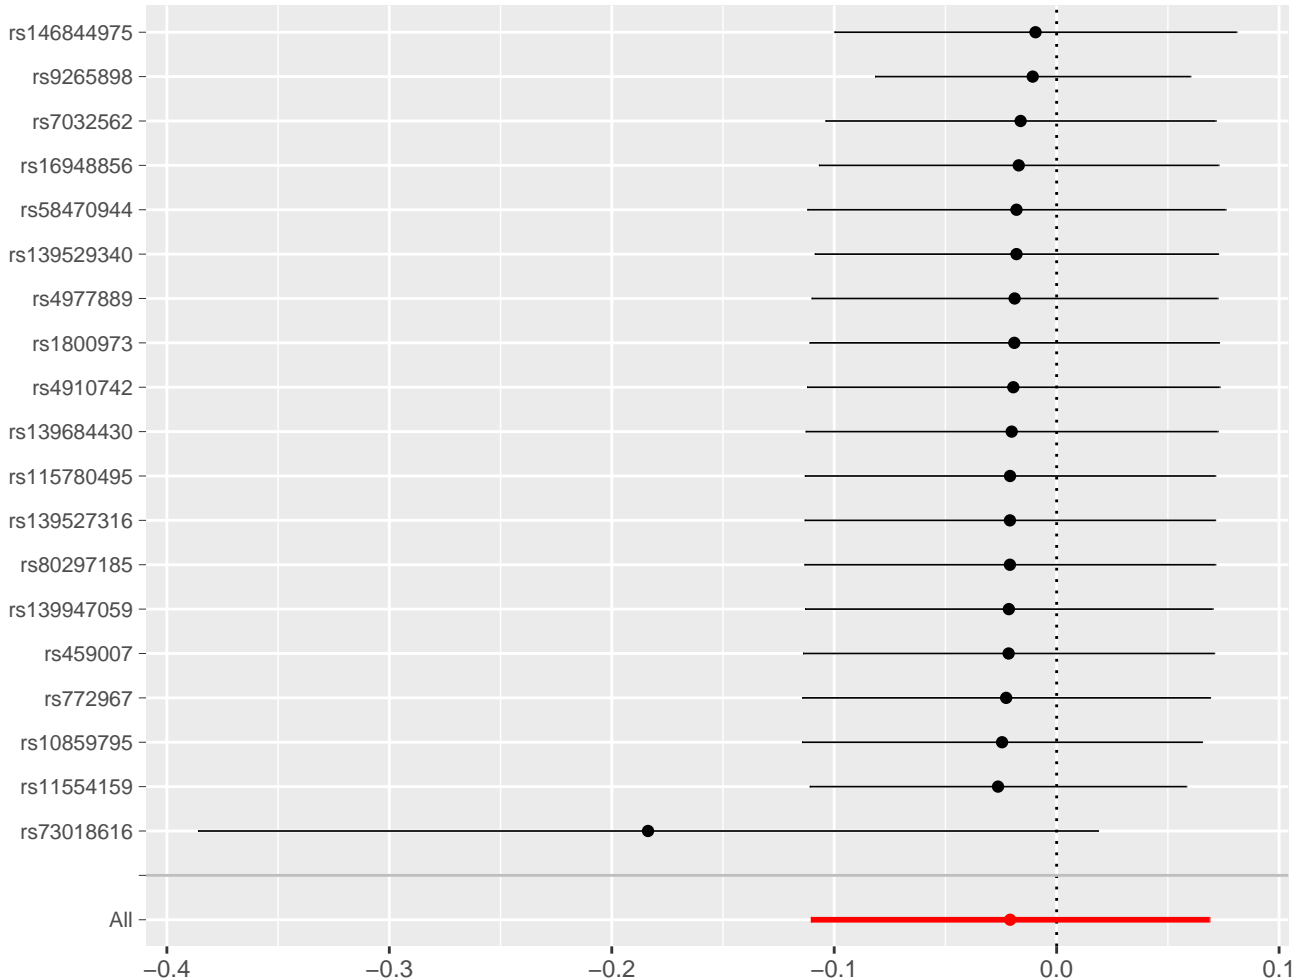

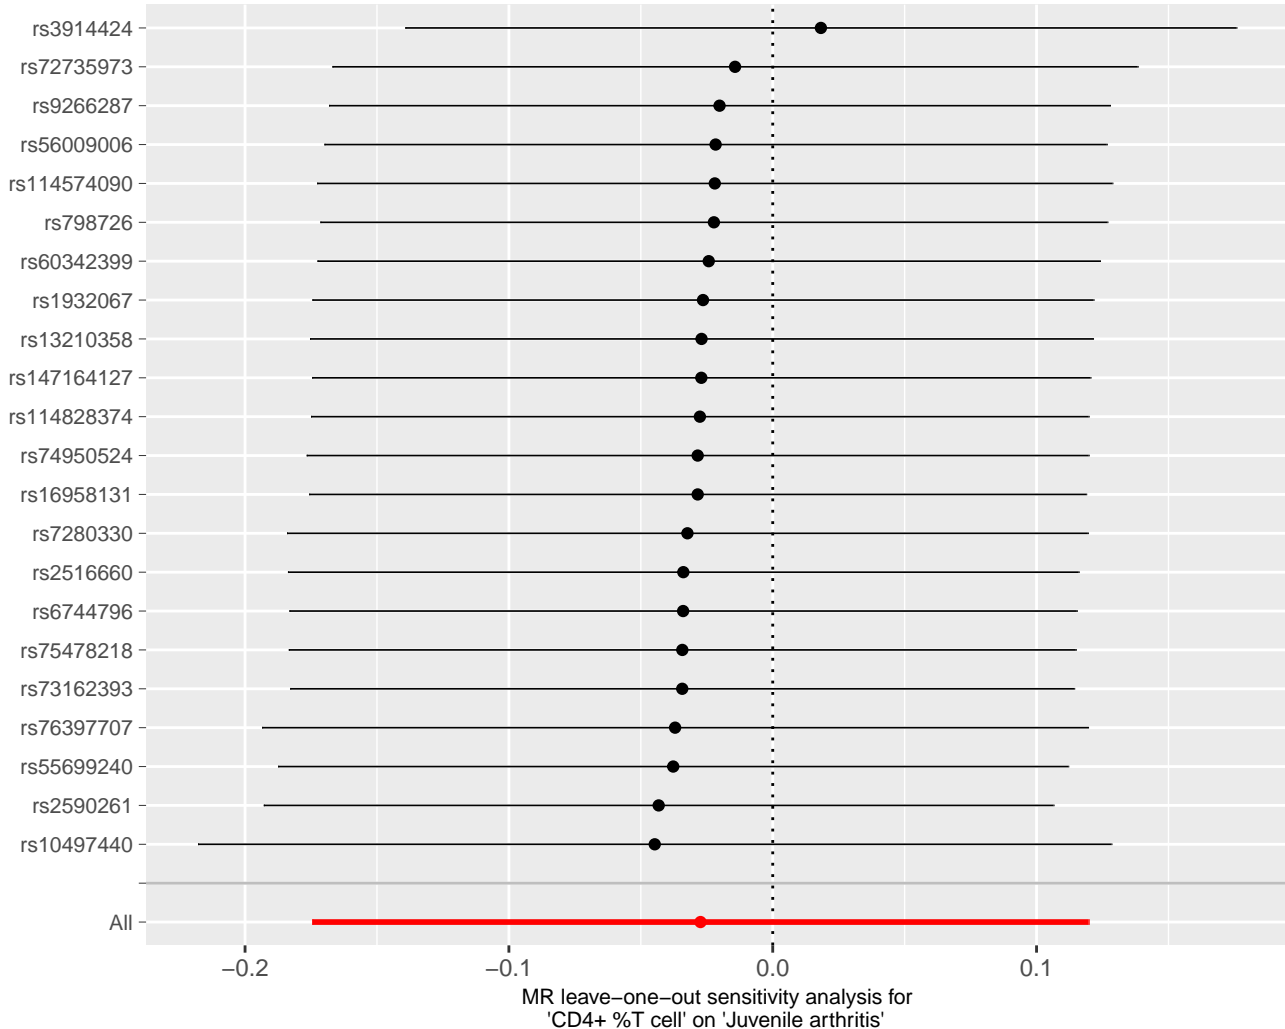

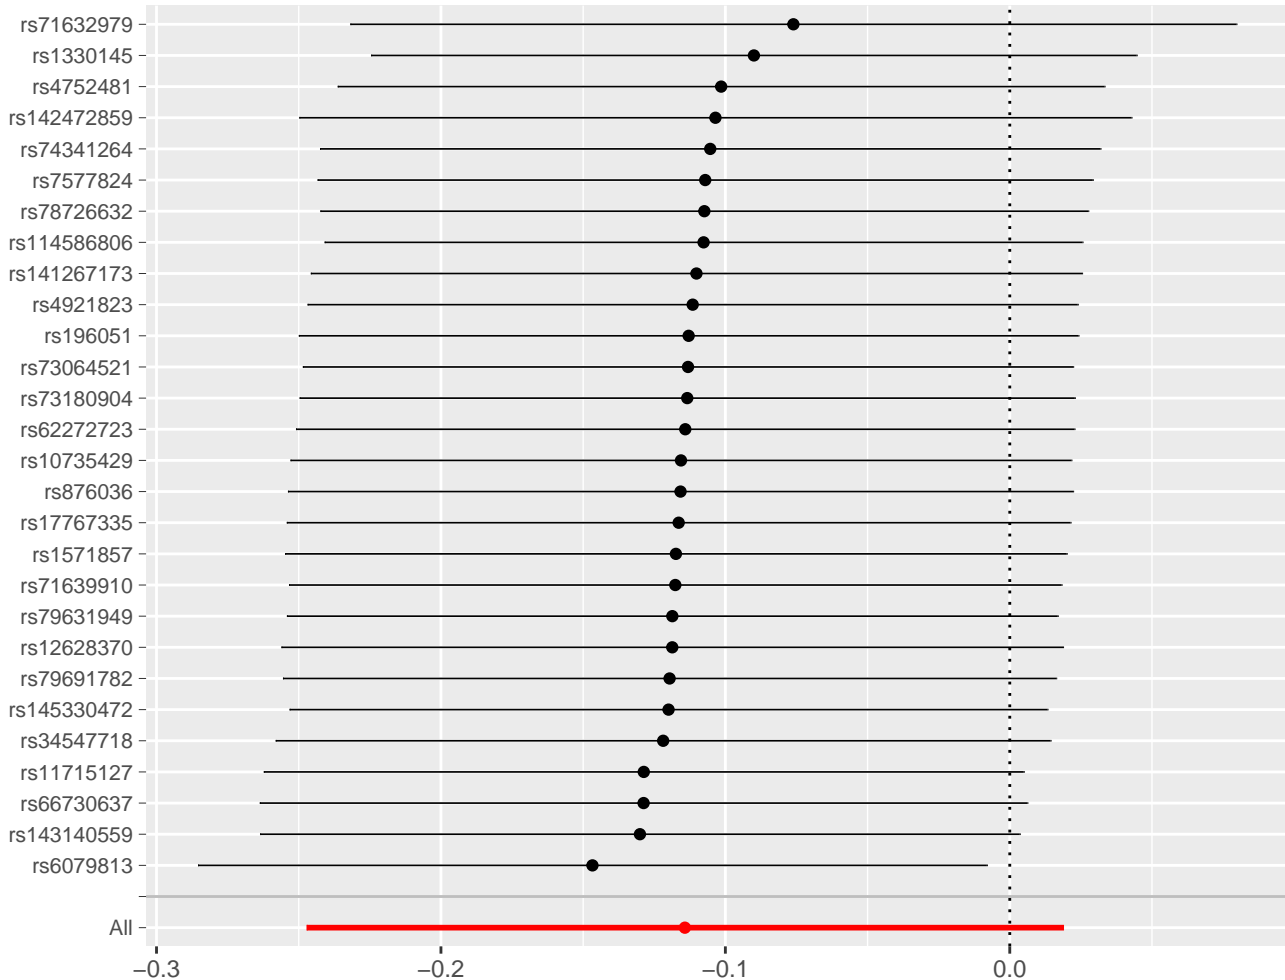

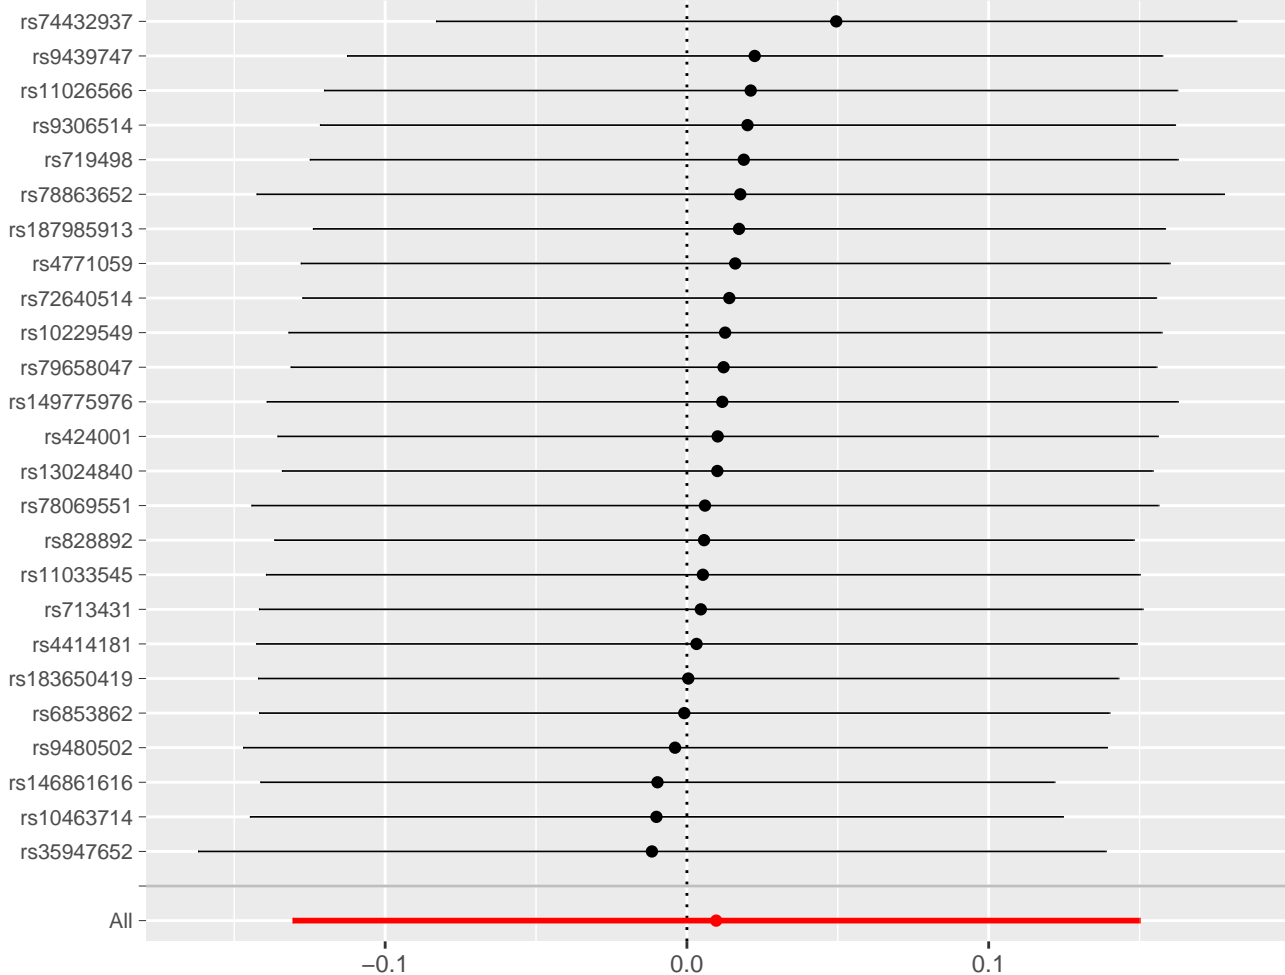

MR leave-one-out sensitivity analysis for 'CD4 on TD CD4+' on 'Juvenile arthritis'

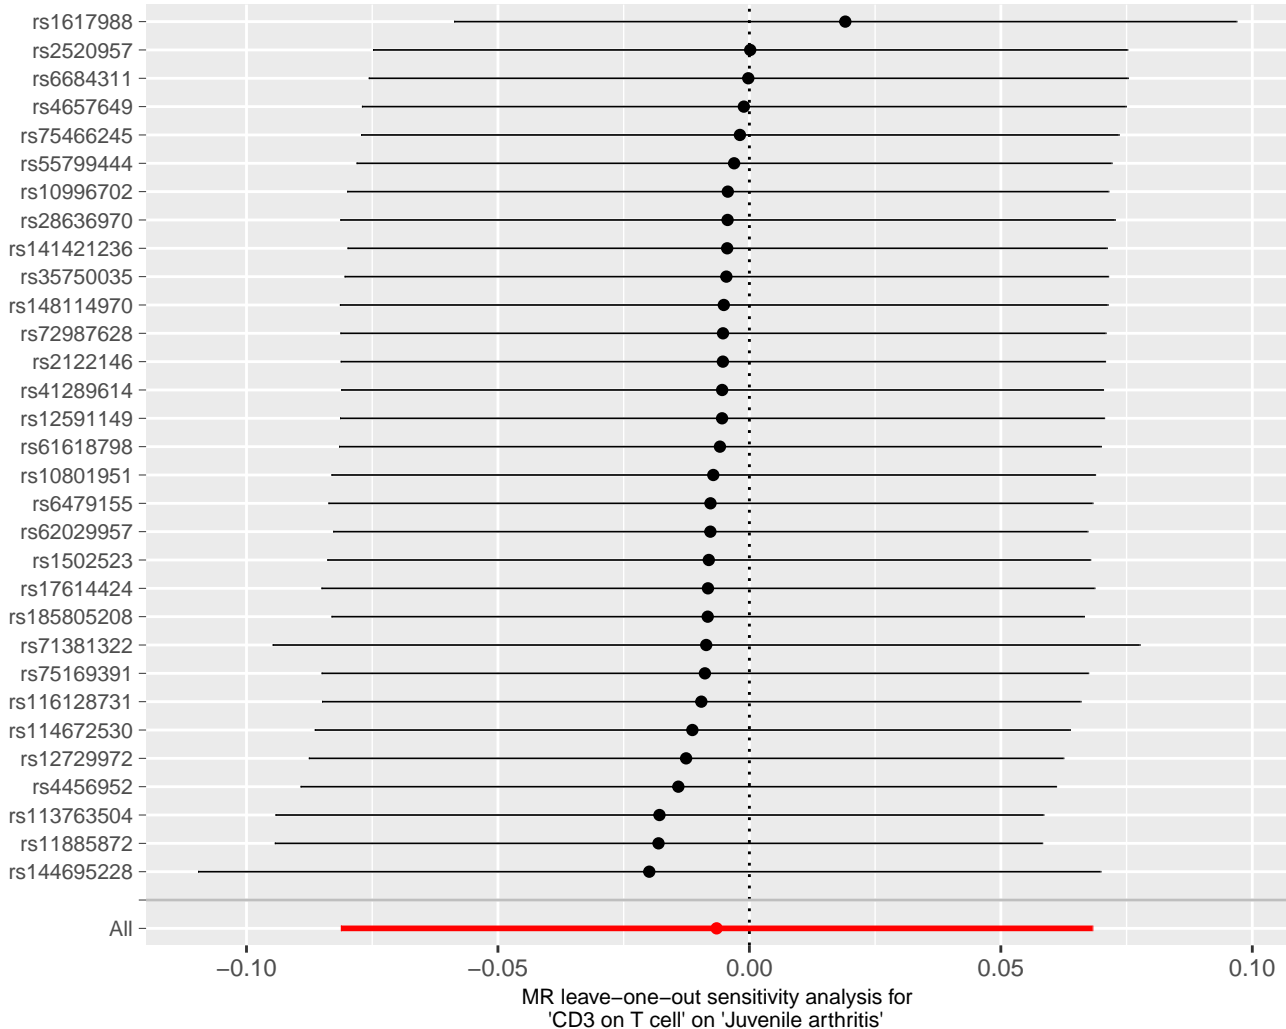

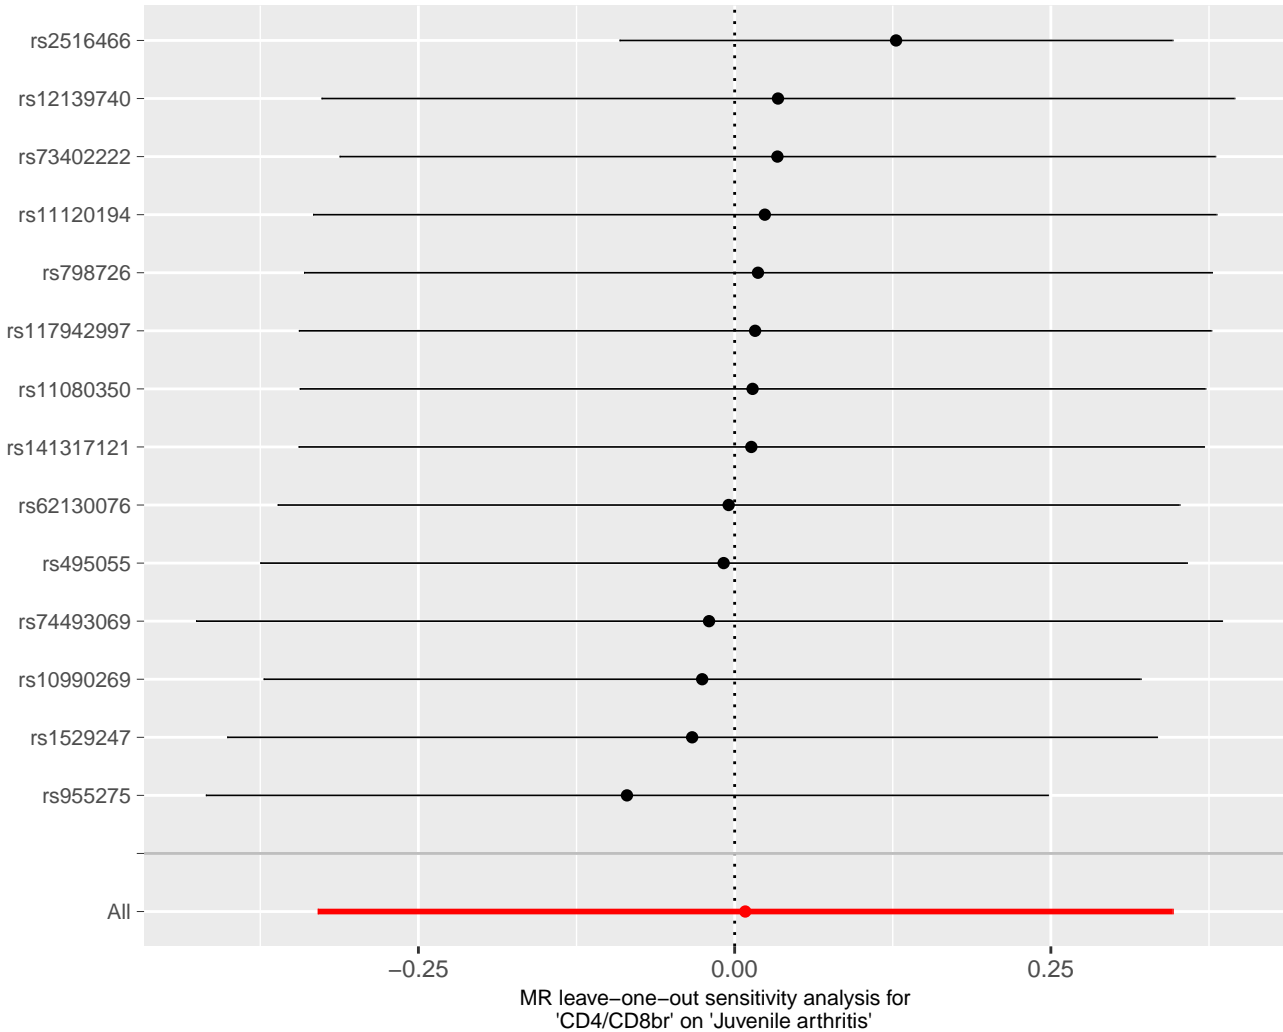

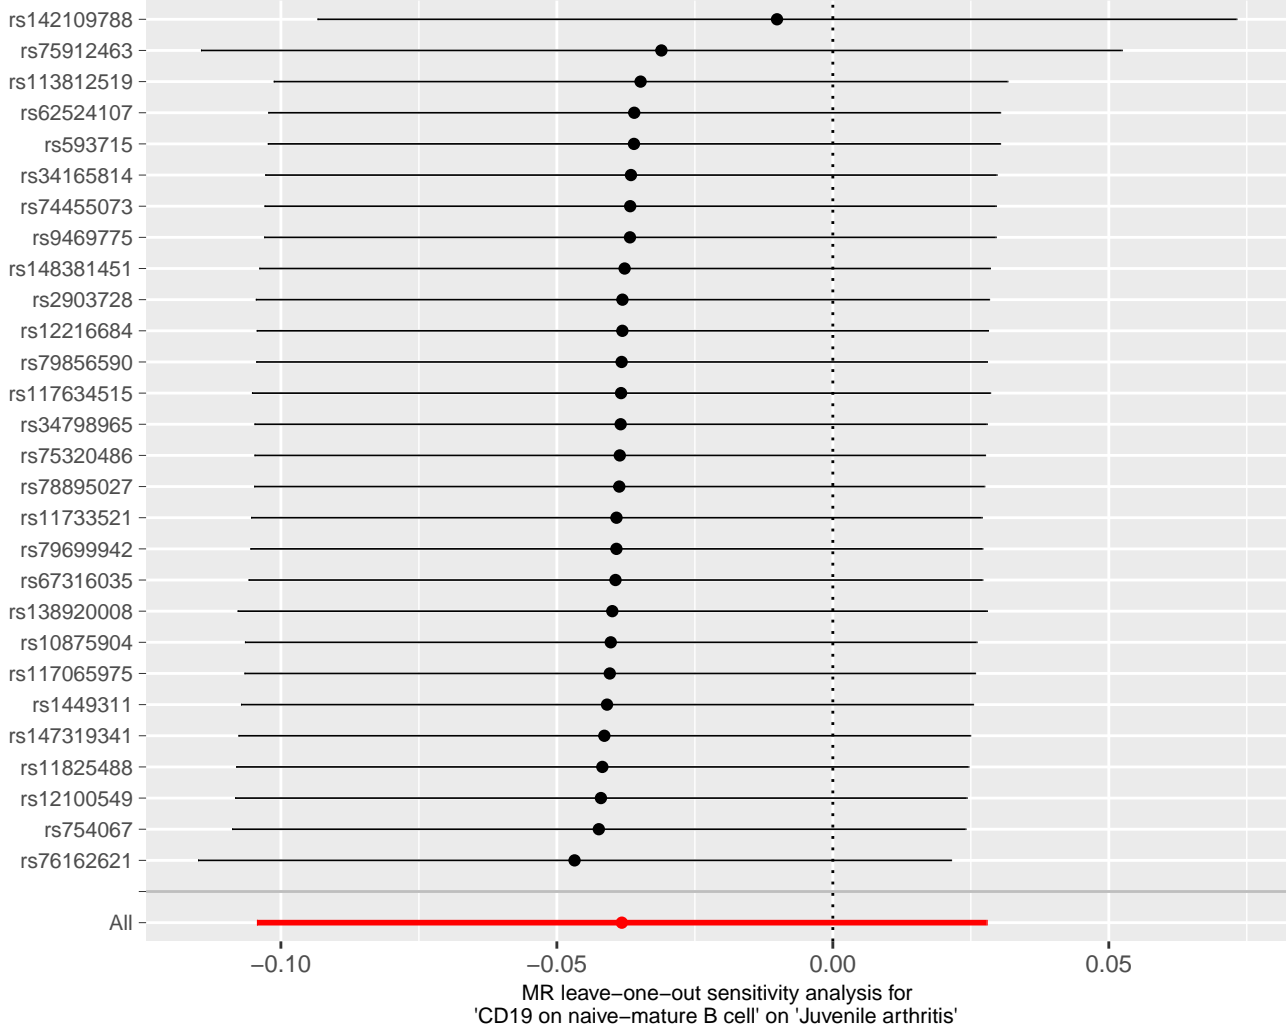

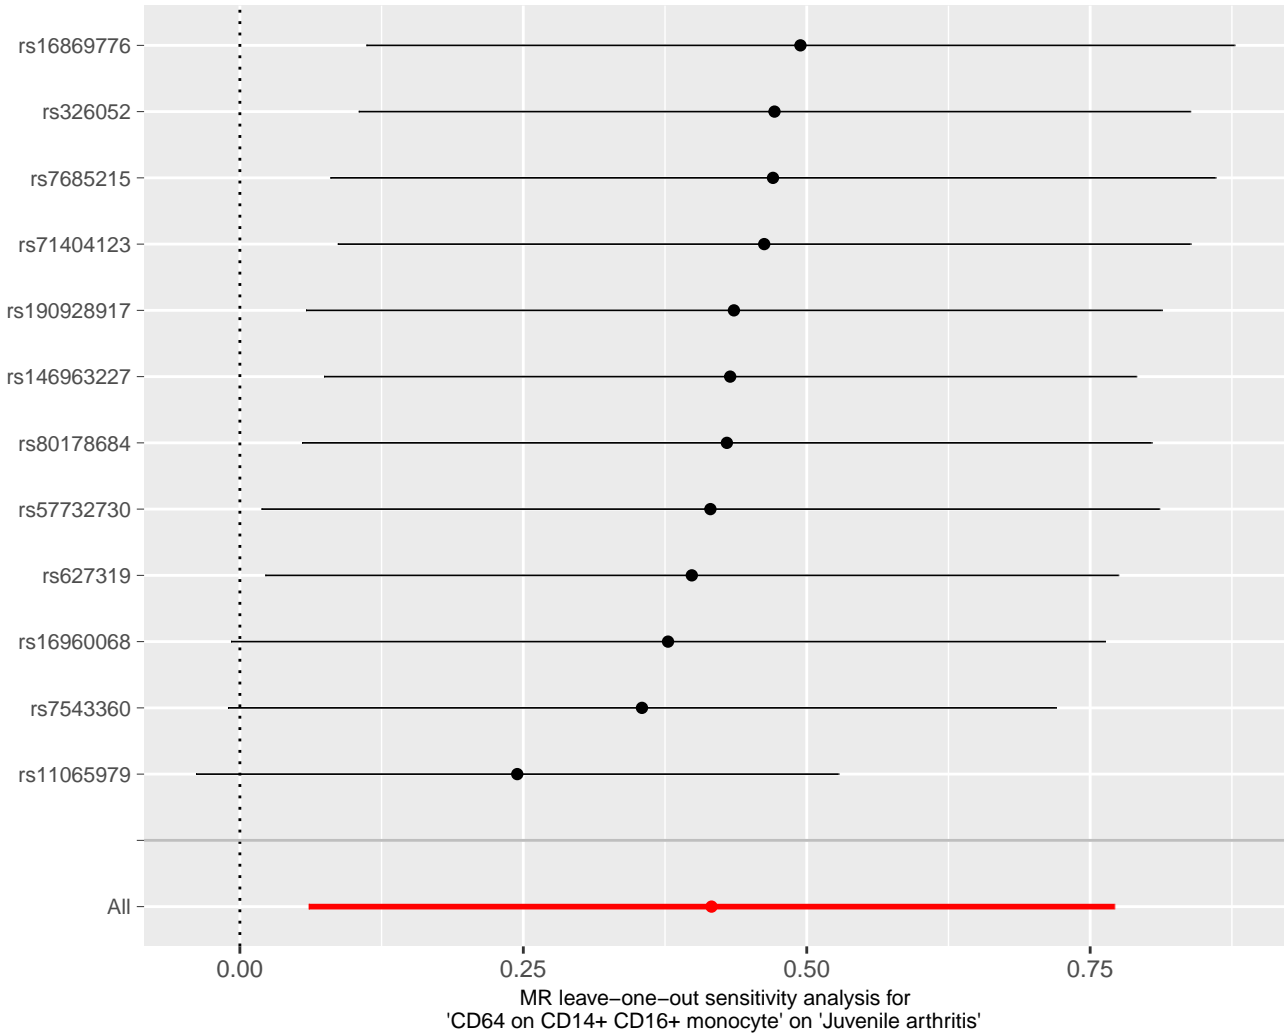



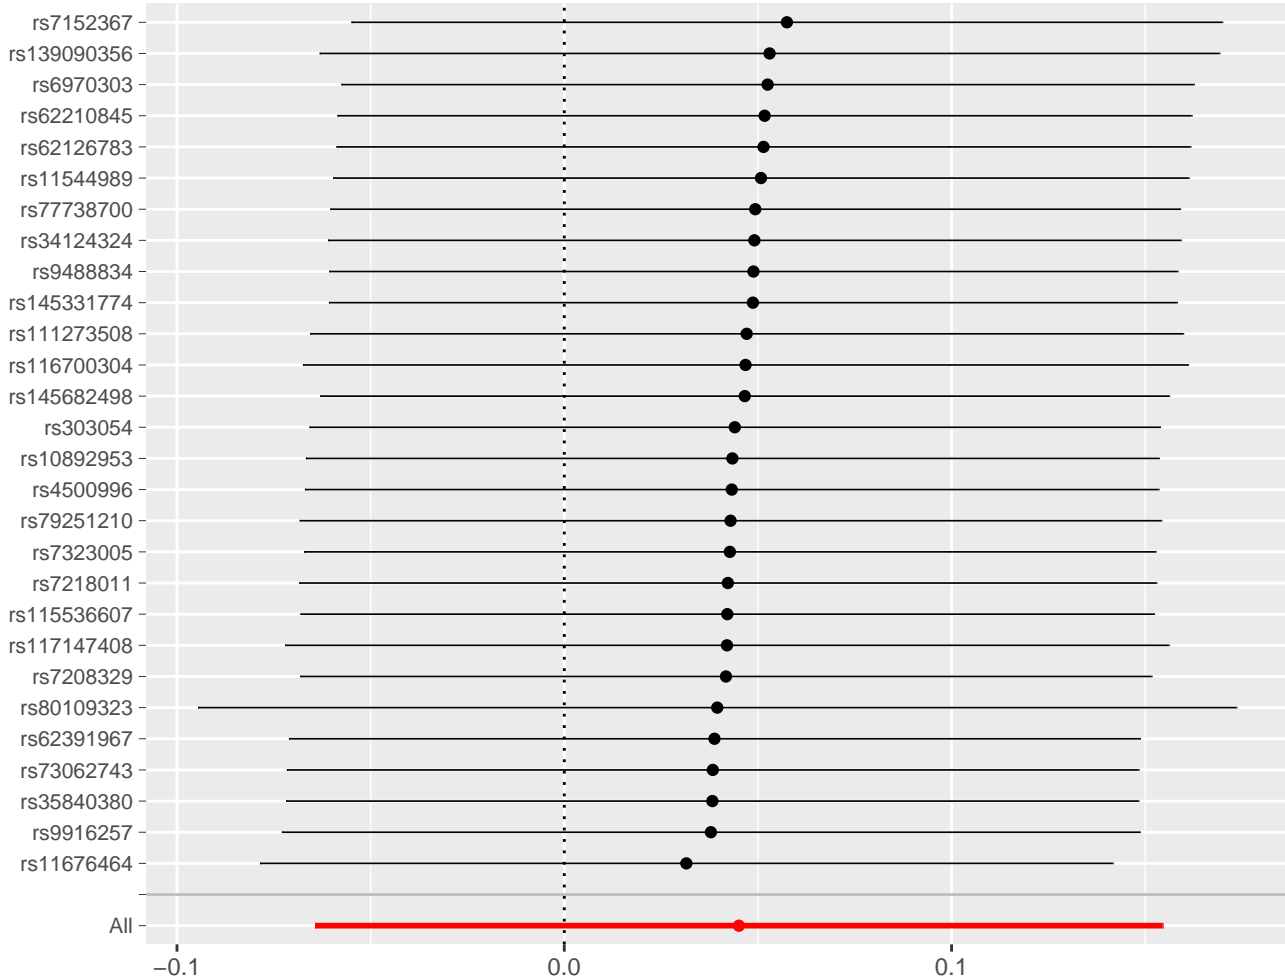

MR leave-one-out sensitivity analysis for 'CD8dim NKT AC' on 'Juvenile arthritis'

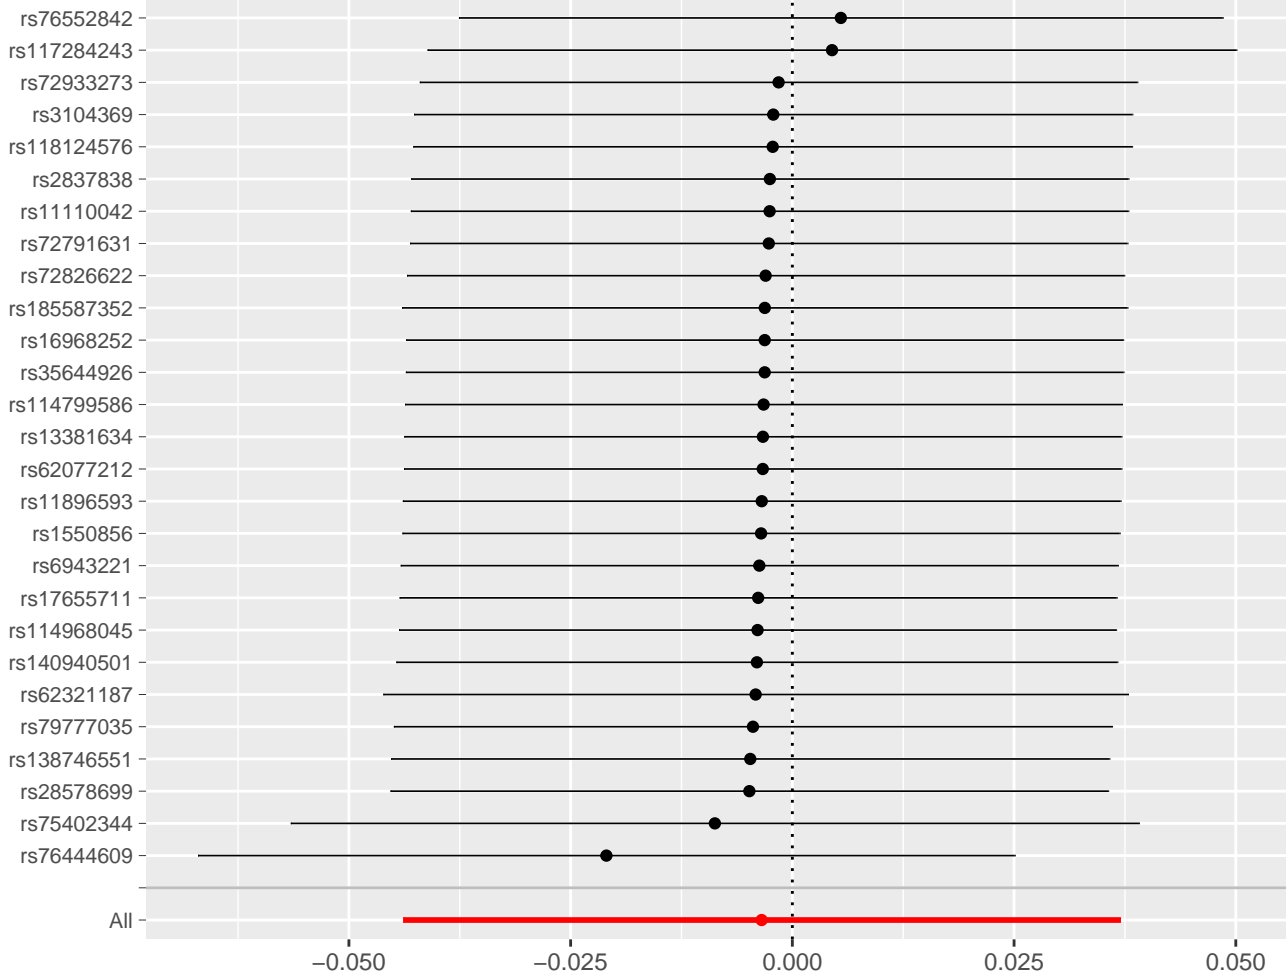

MR leave-one-out sensitivity analysis for 'CD45RA+ CD8br AC' on 'Juvenile arthritis'

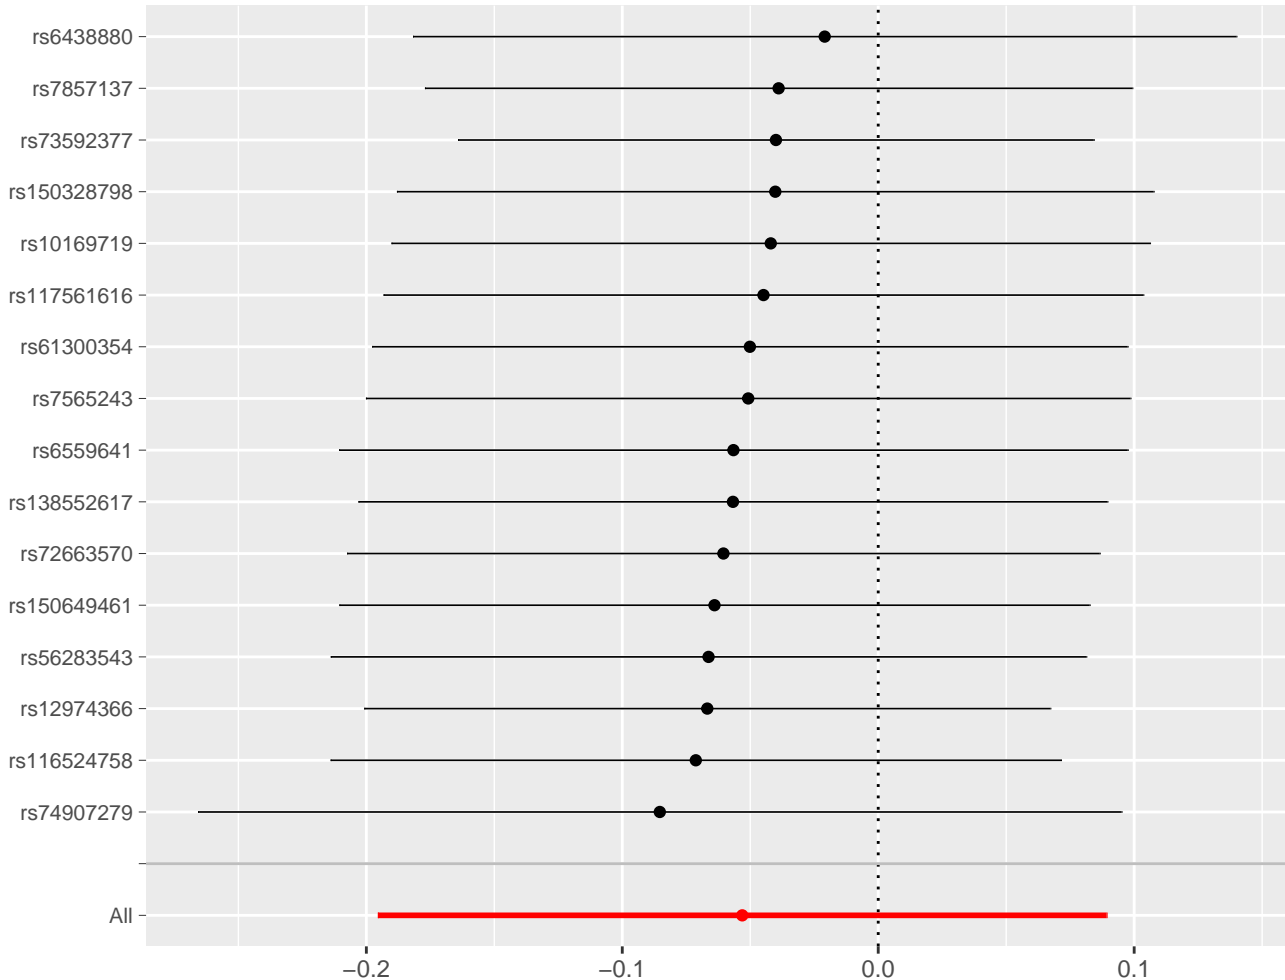

MR leave-one-out sensitivity analysis for 'CD86 on monocyte' on 'Juvenile arthritis'

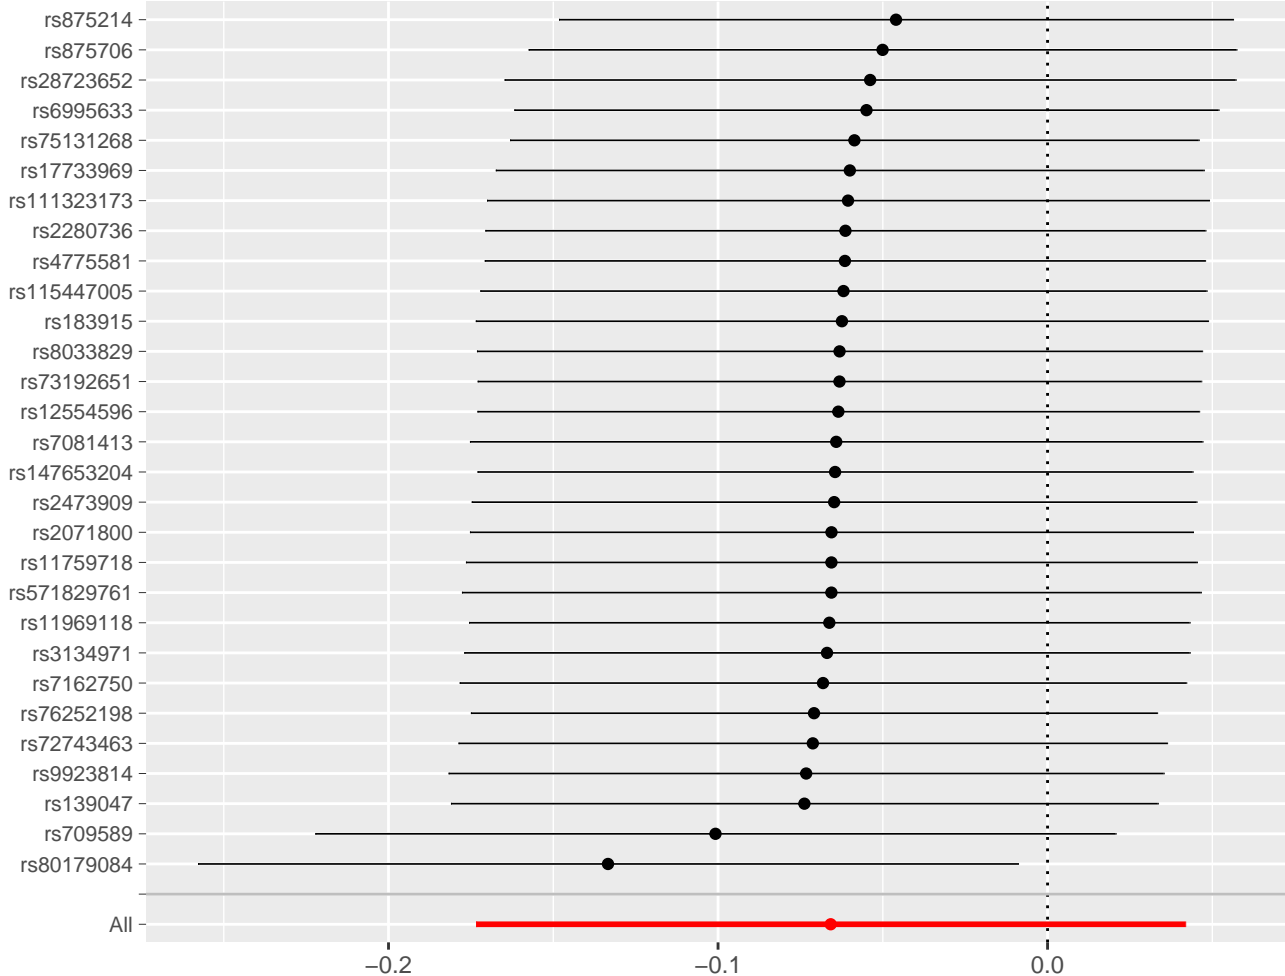

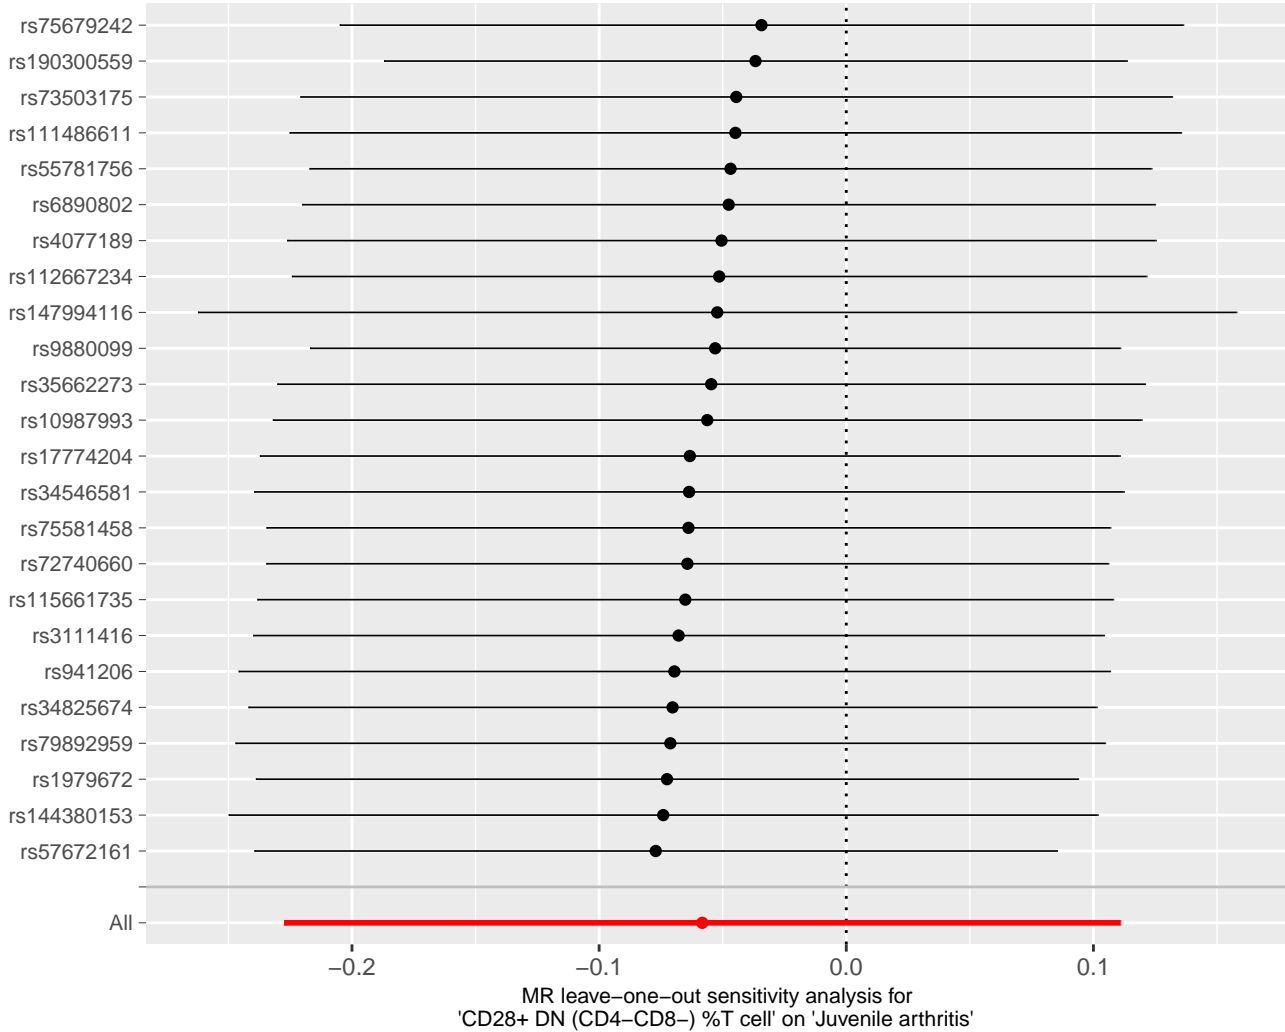

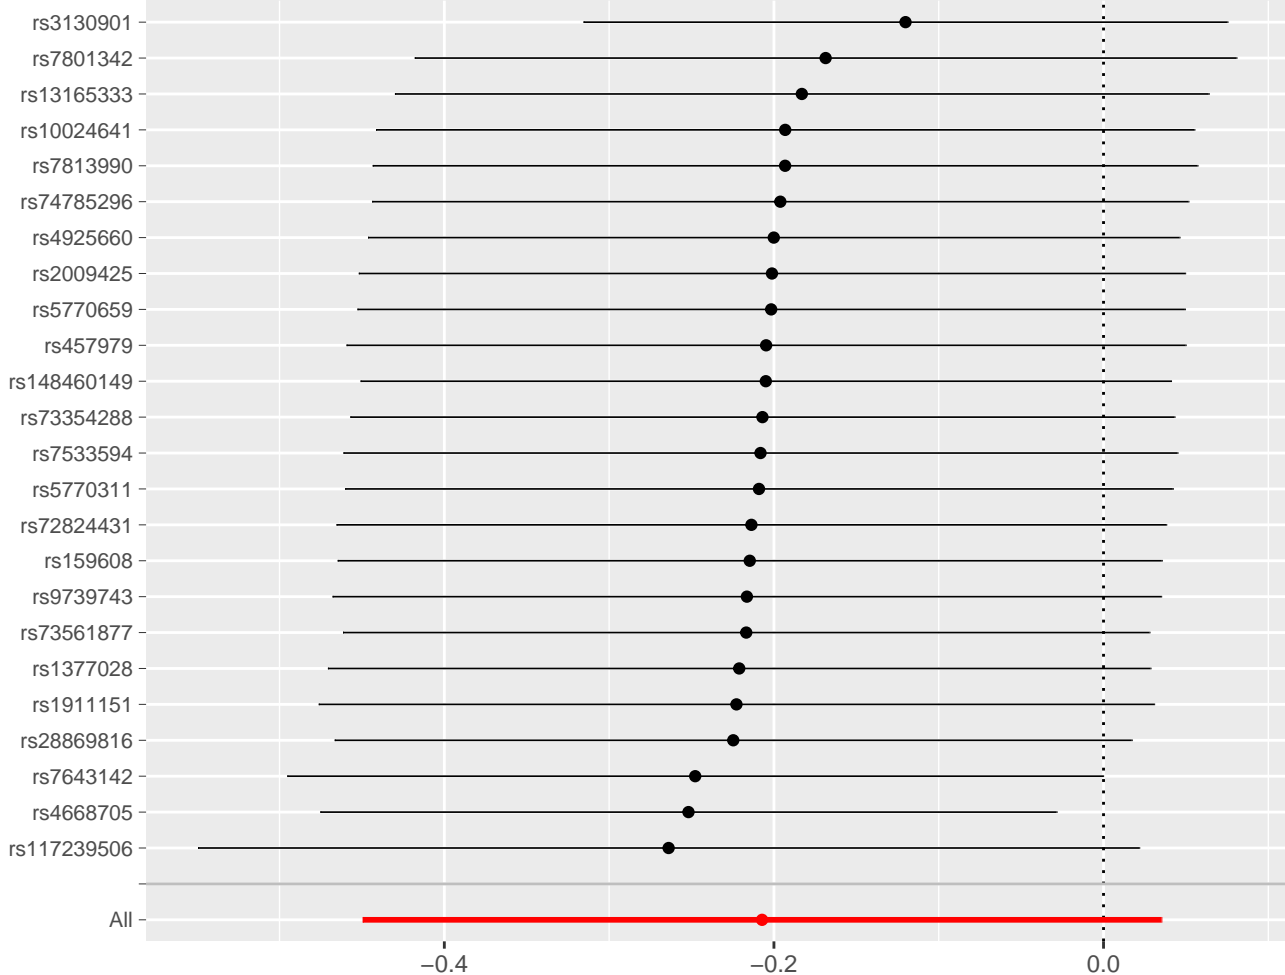

MR leave-one-out sensitivity analysis for 'CD127 on CD8br' on 'Juvenile arthritis'

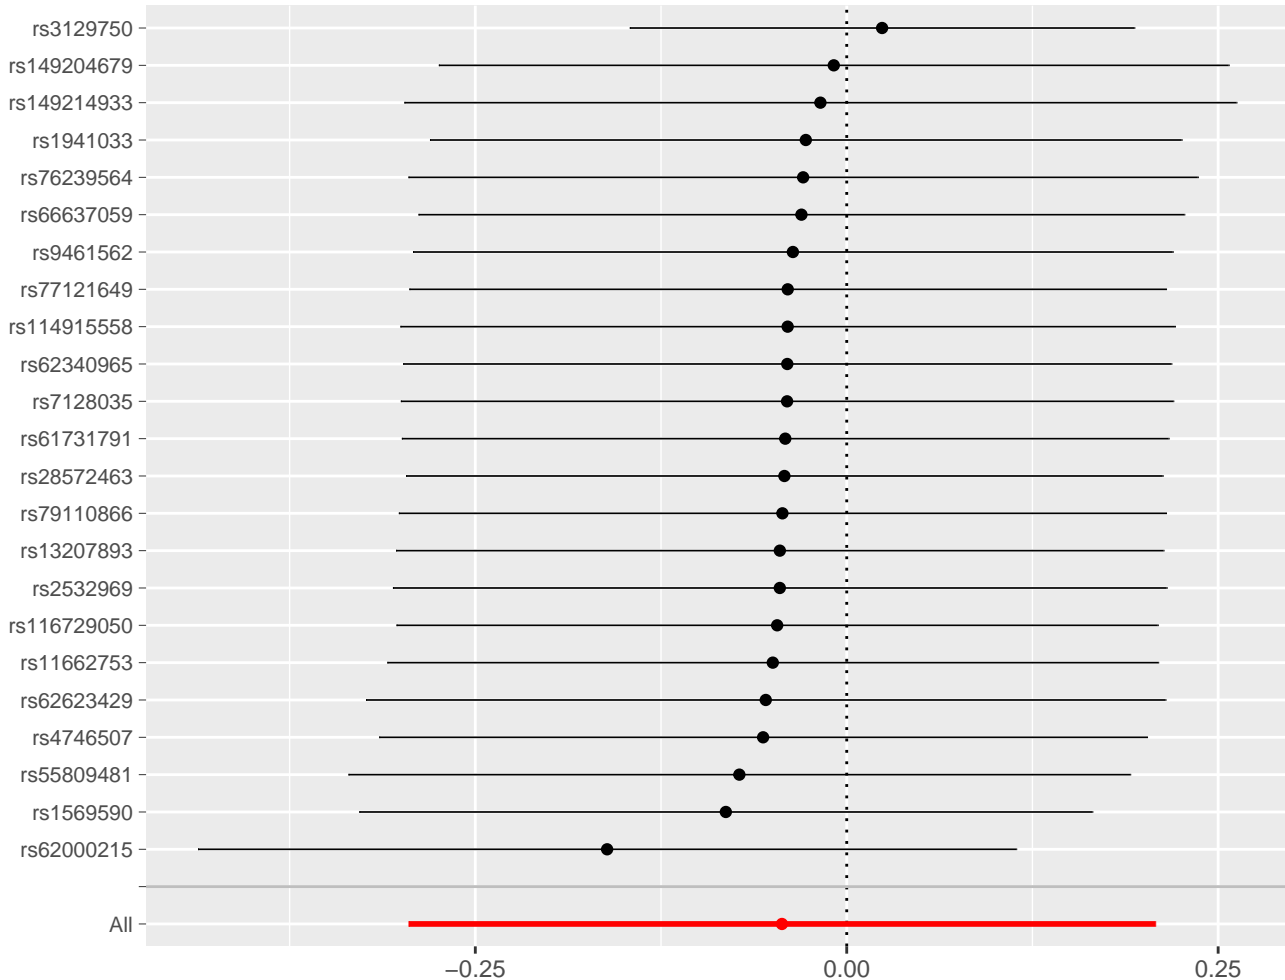

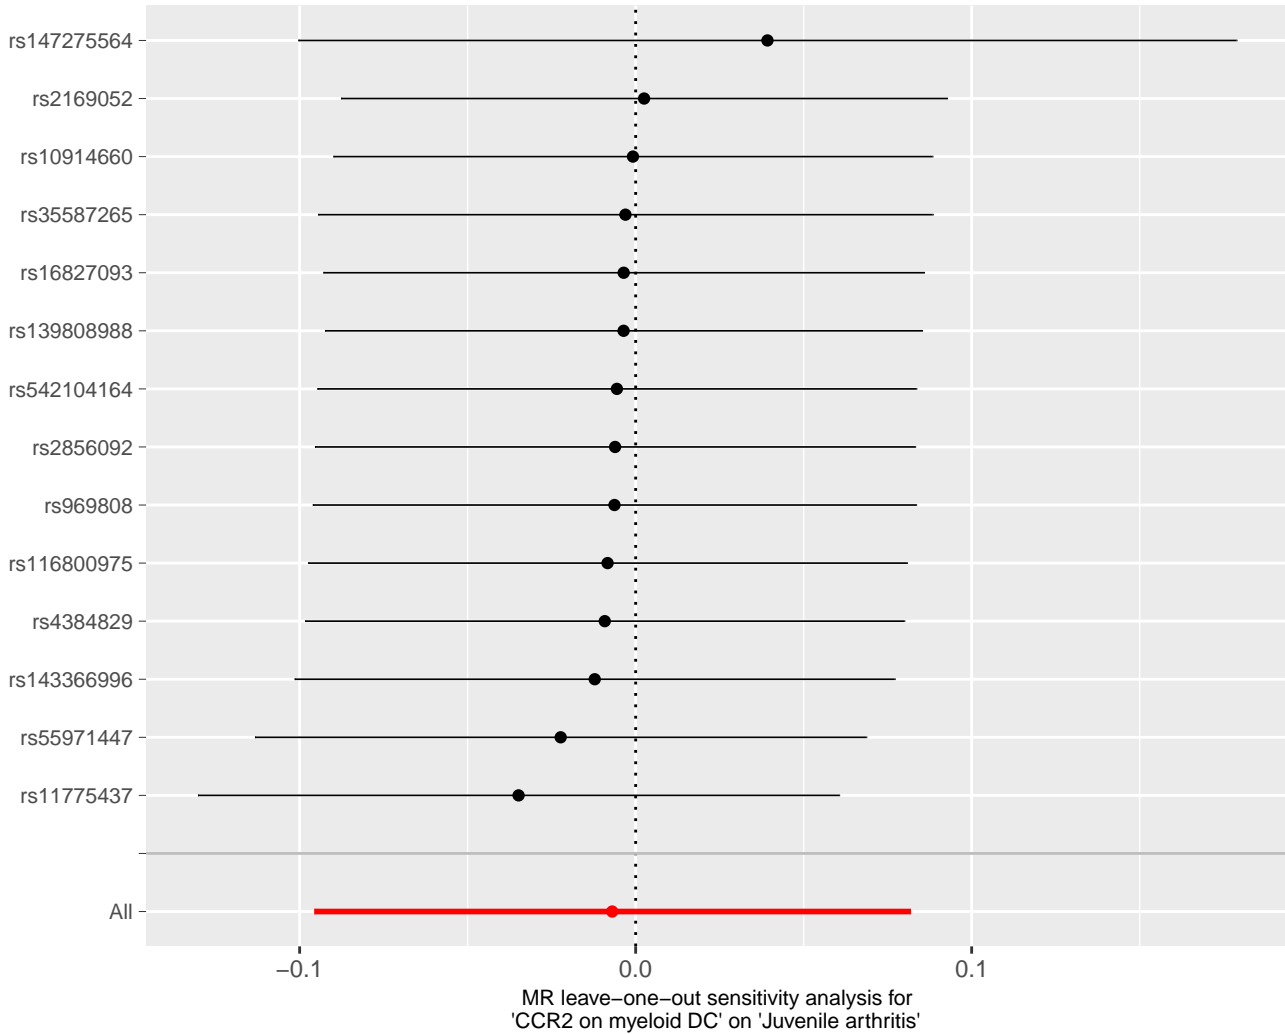



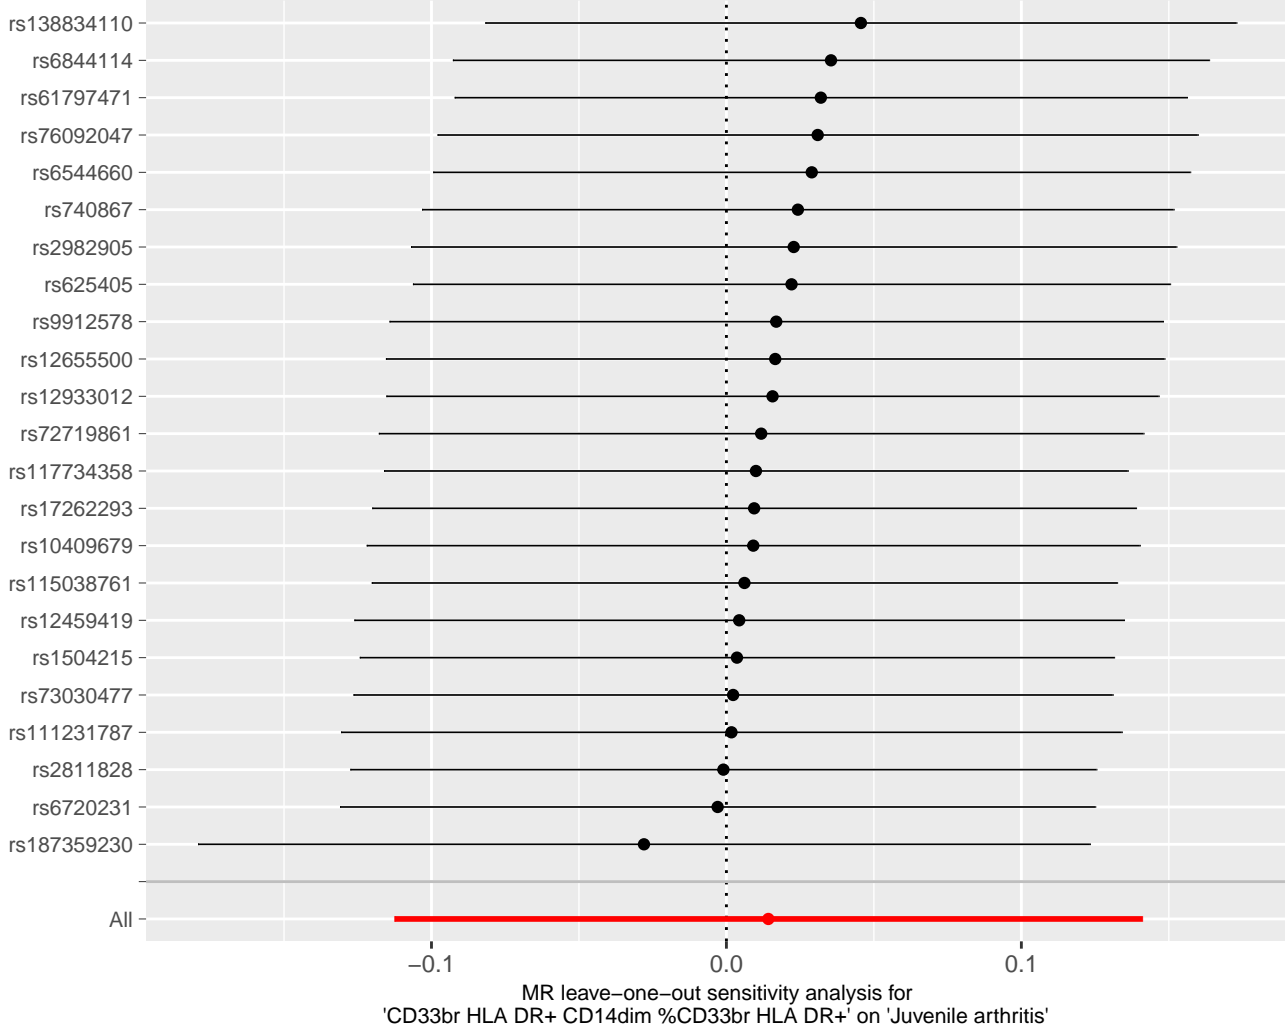

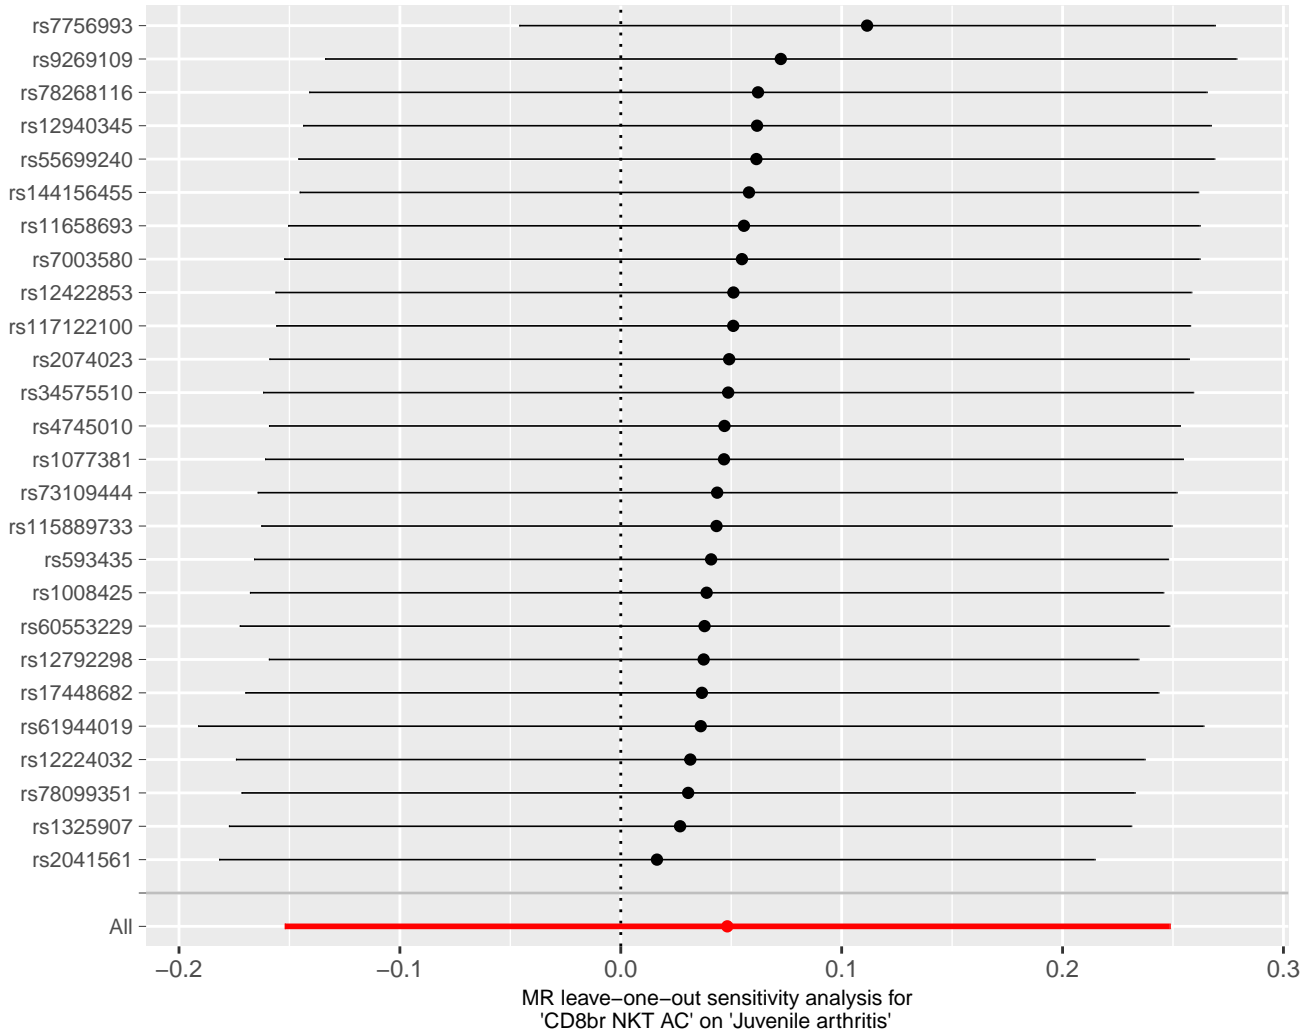

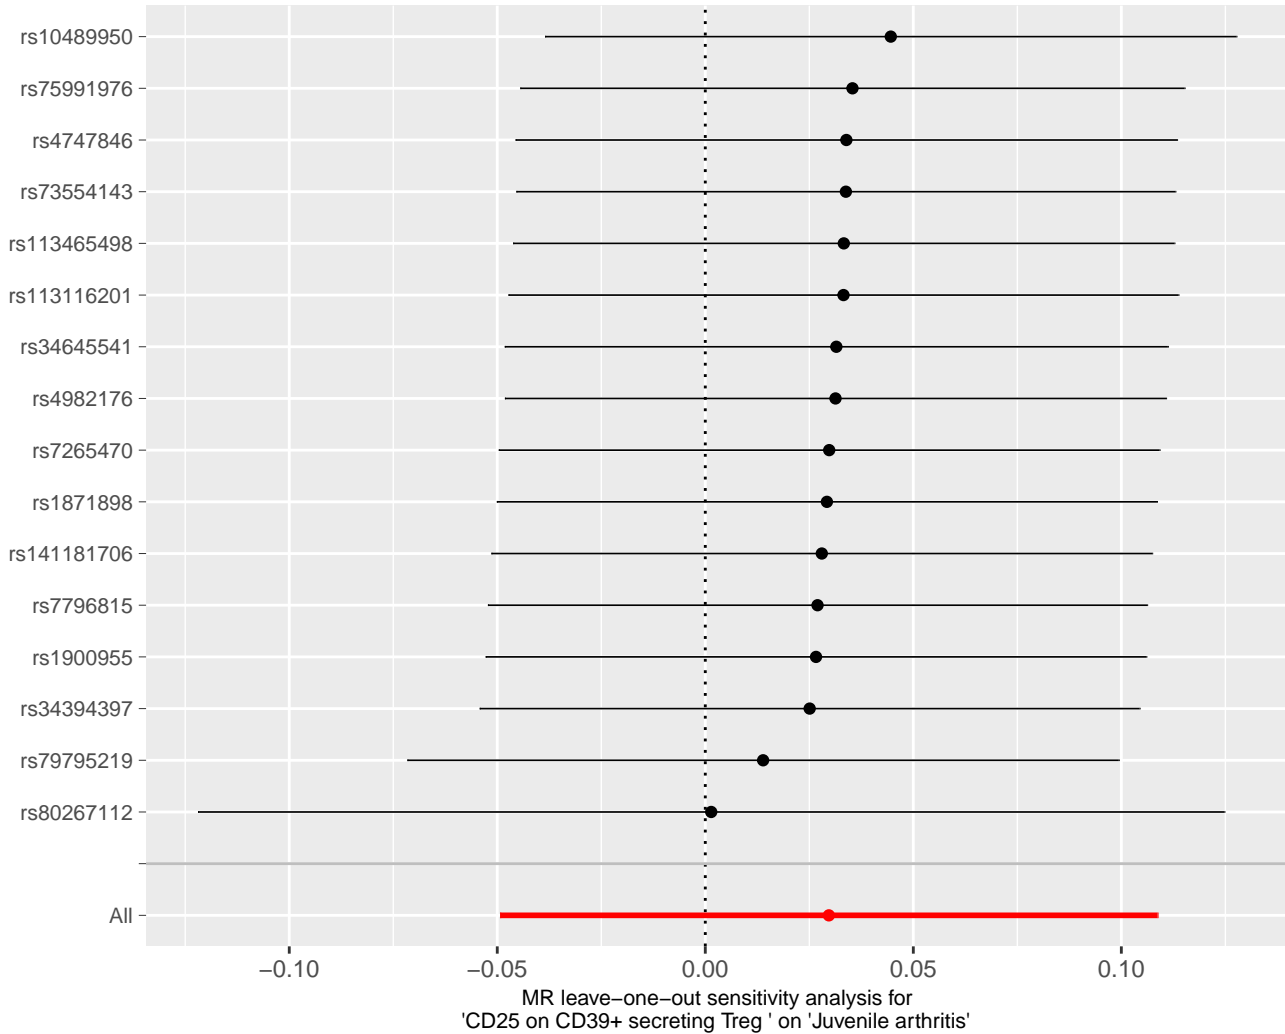

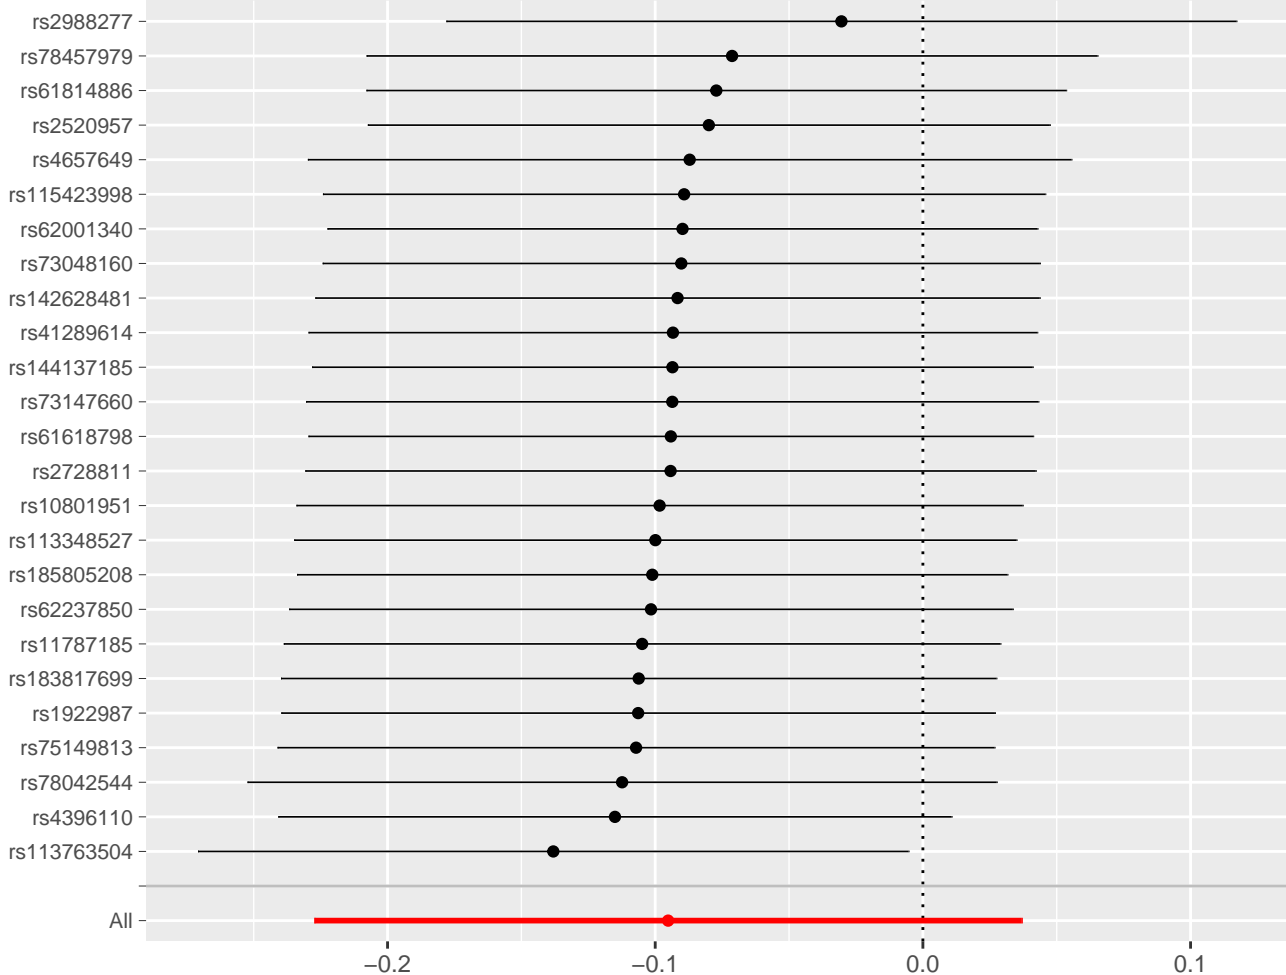

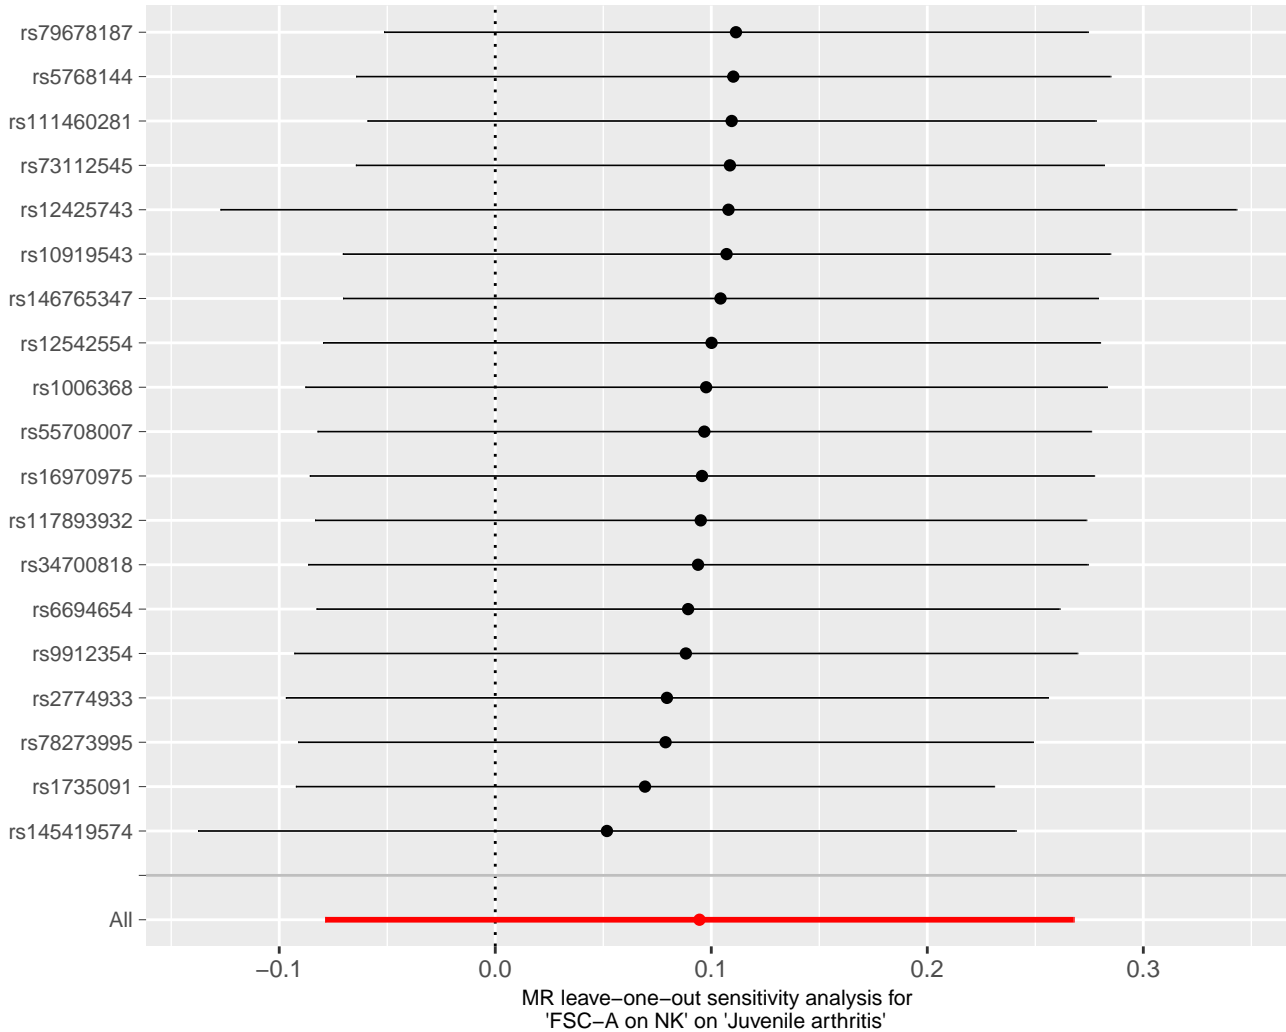

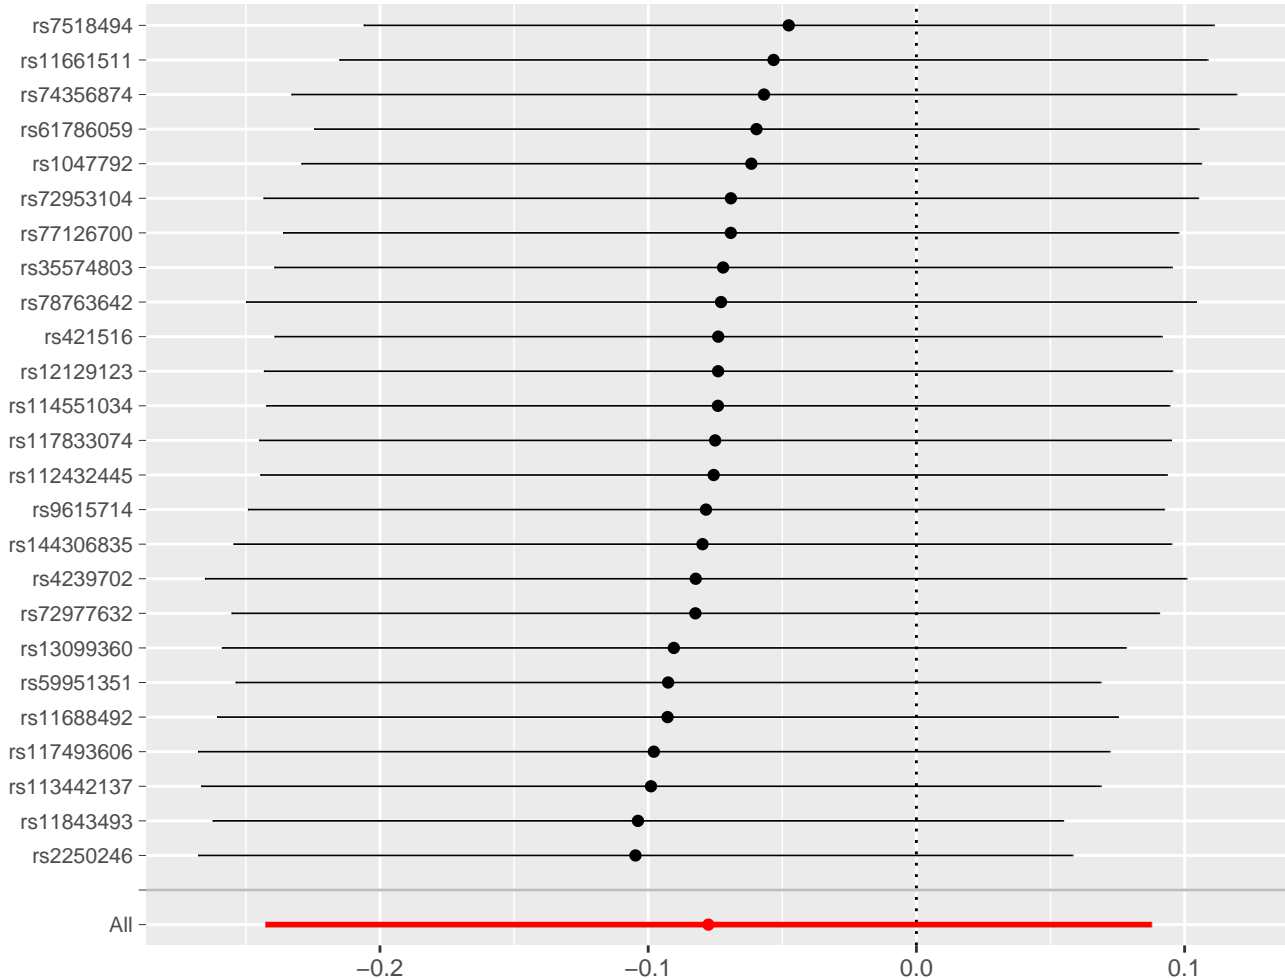

MR leave-one-out sensitivity analysis for 'IgD- CD27- AC' on 'Juvenile arthritis'

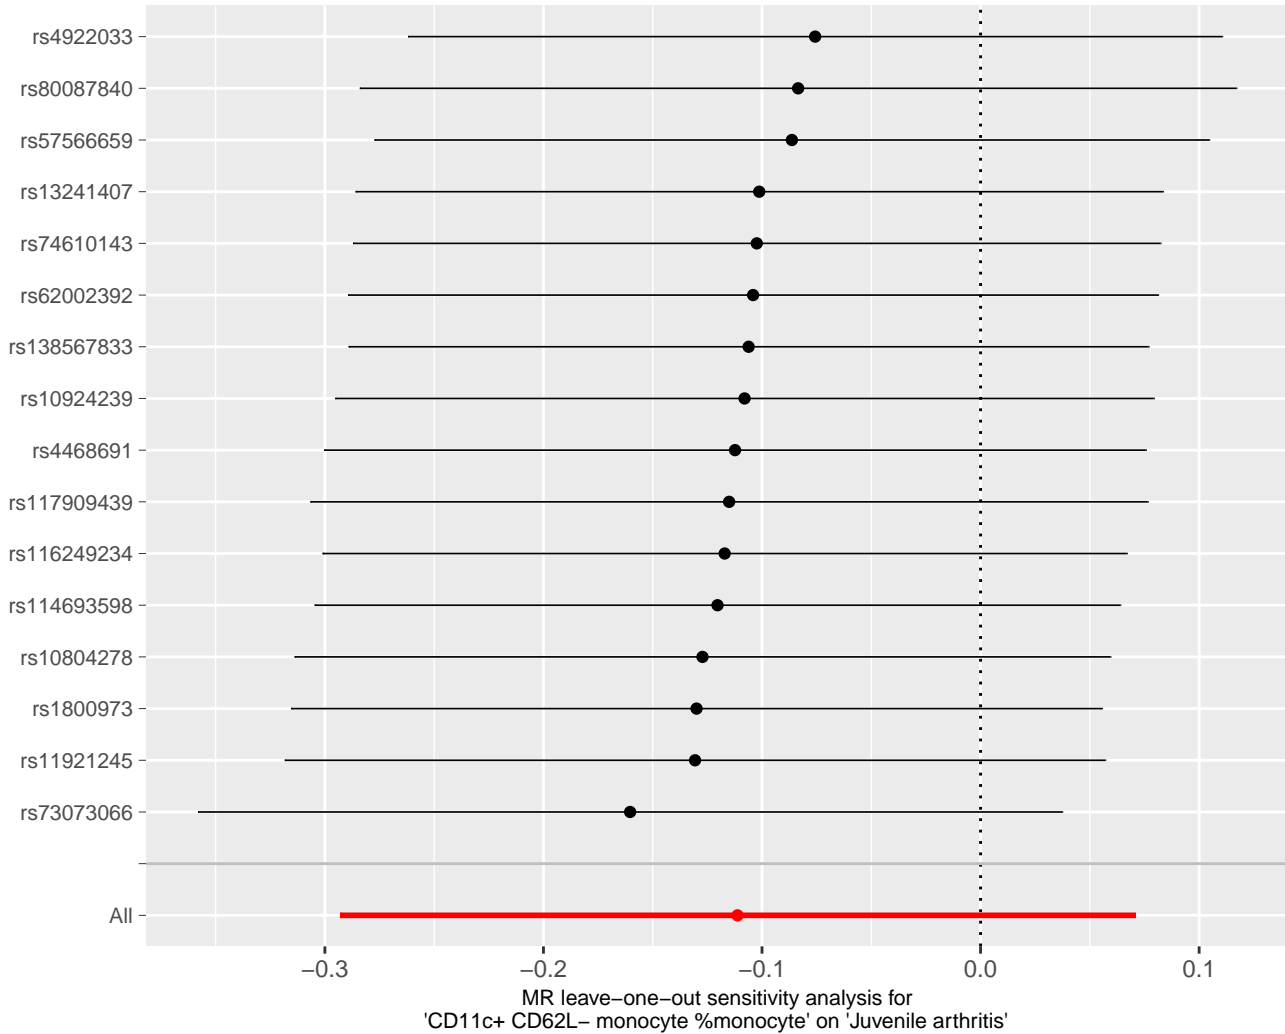

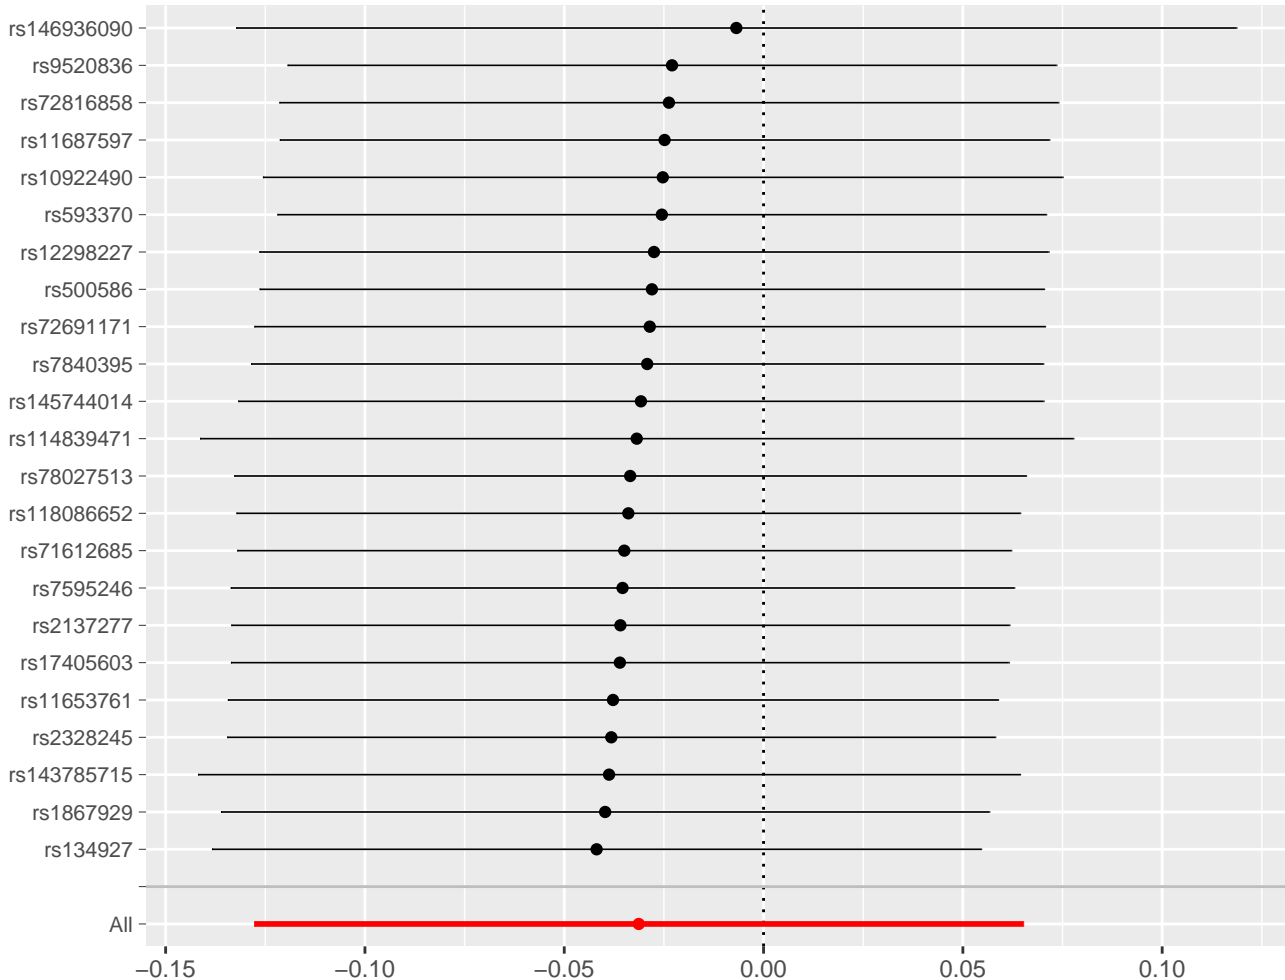



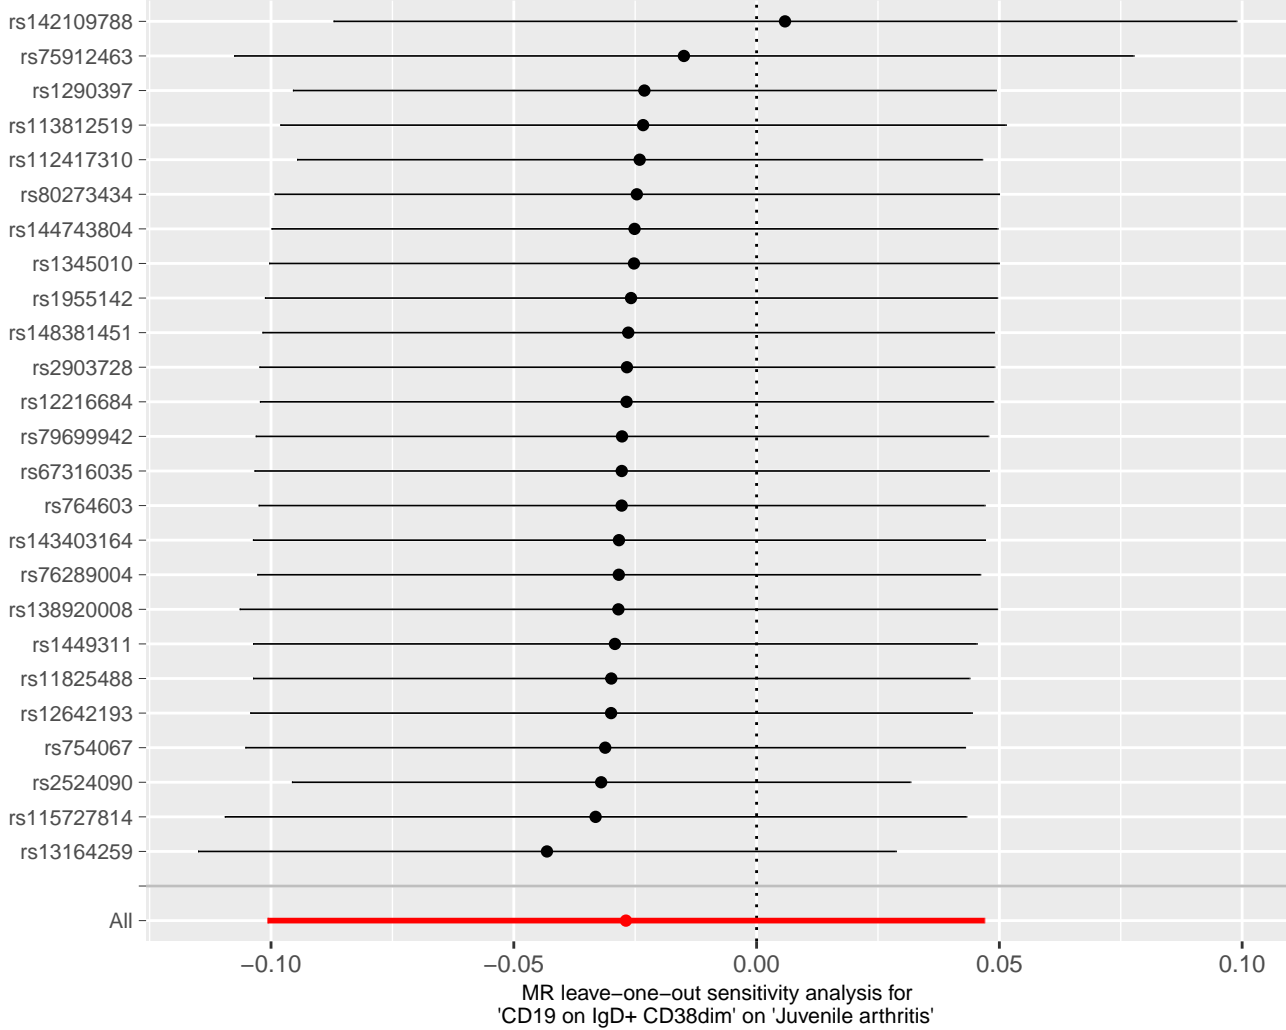

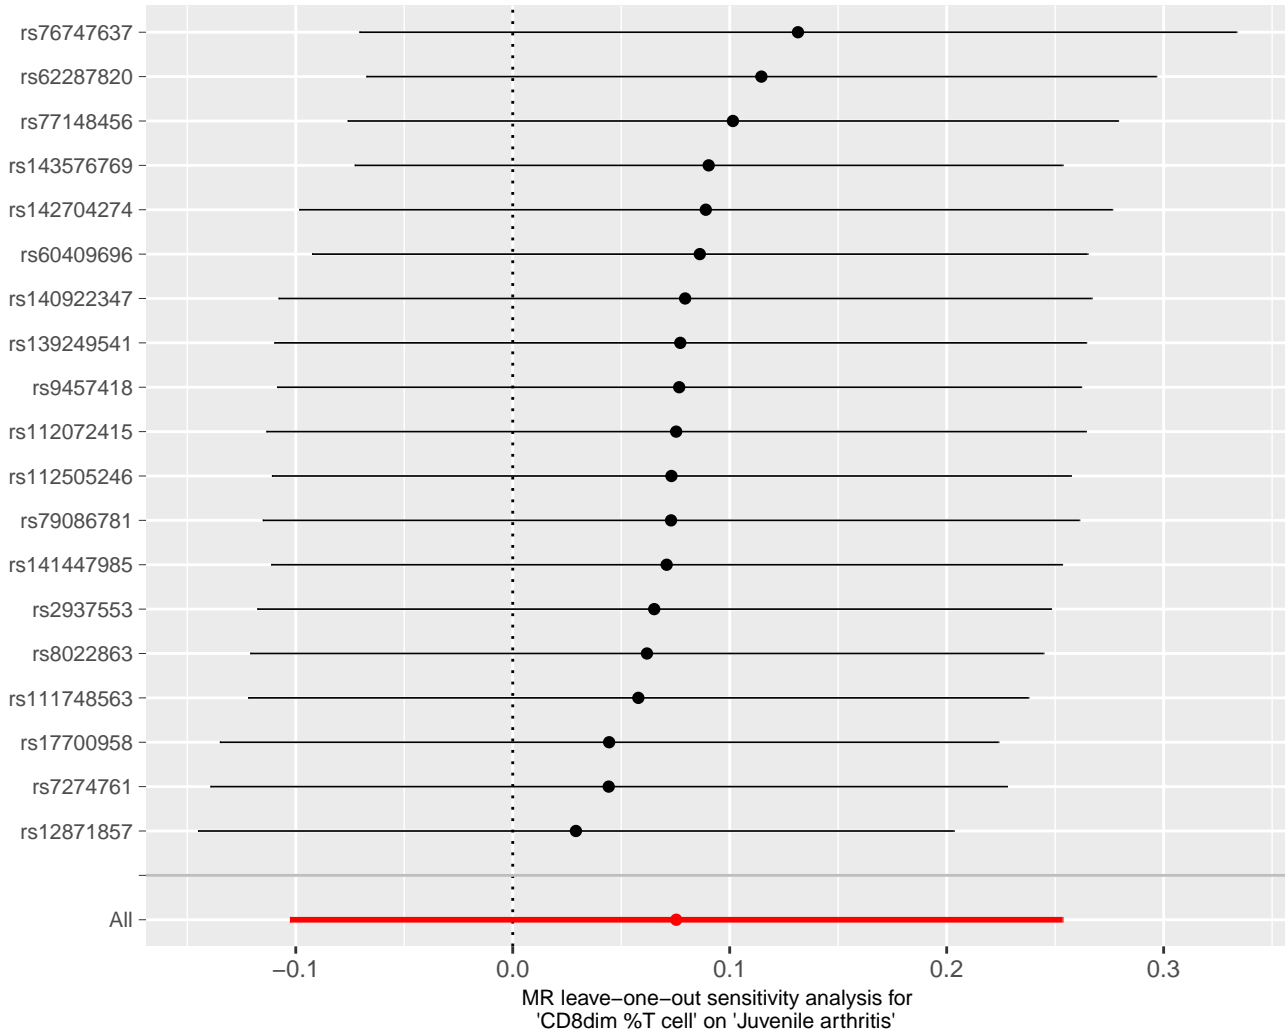

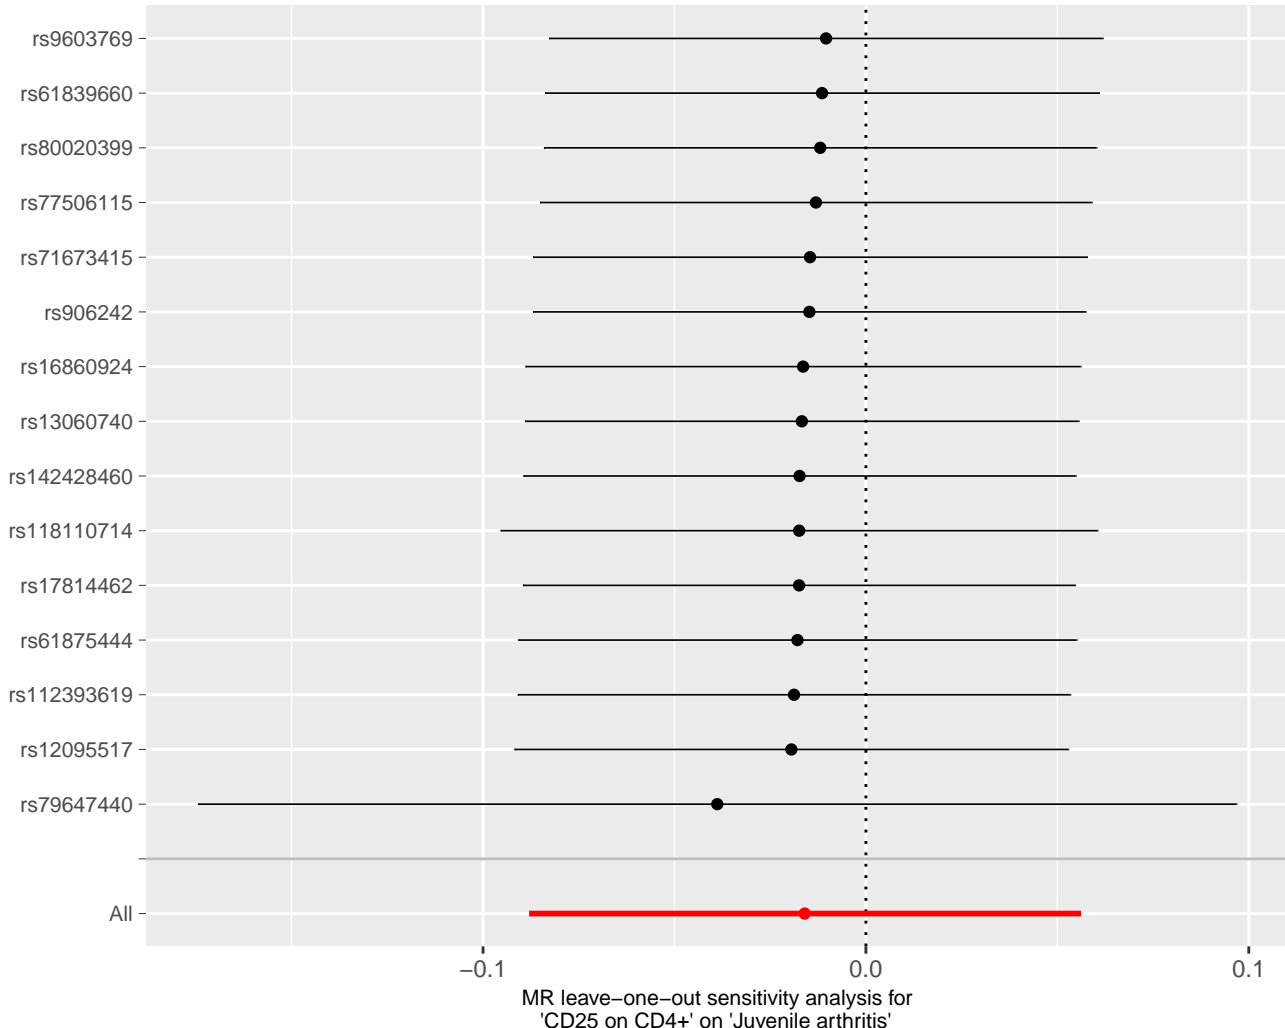

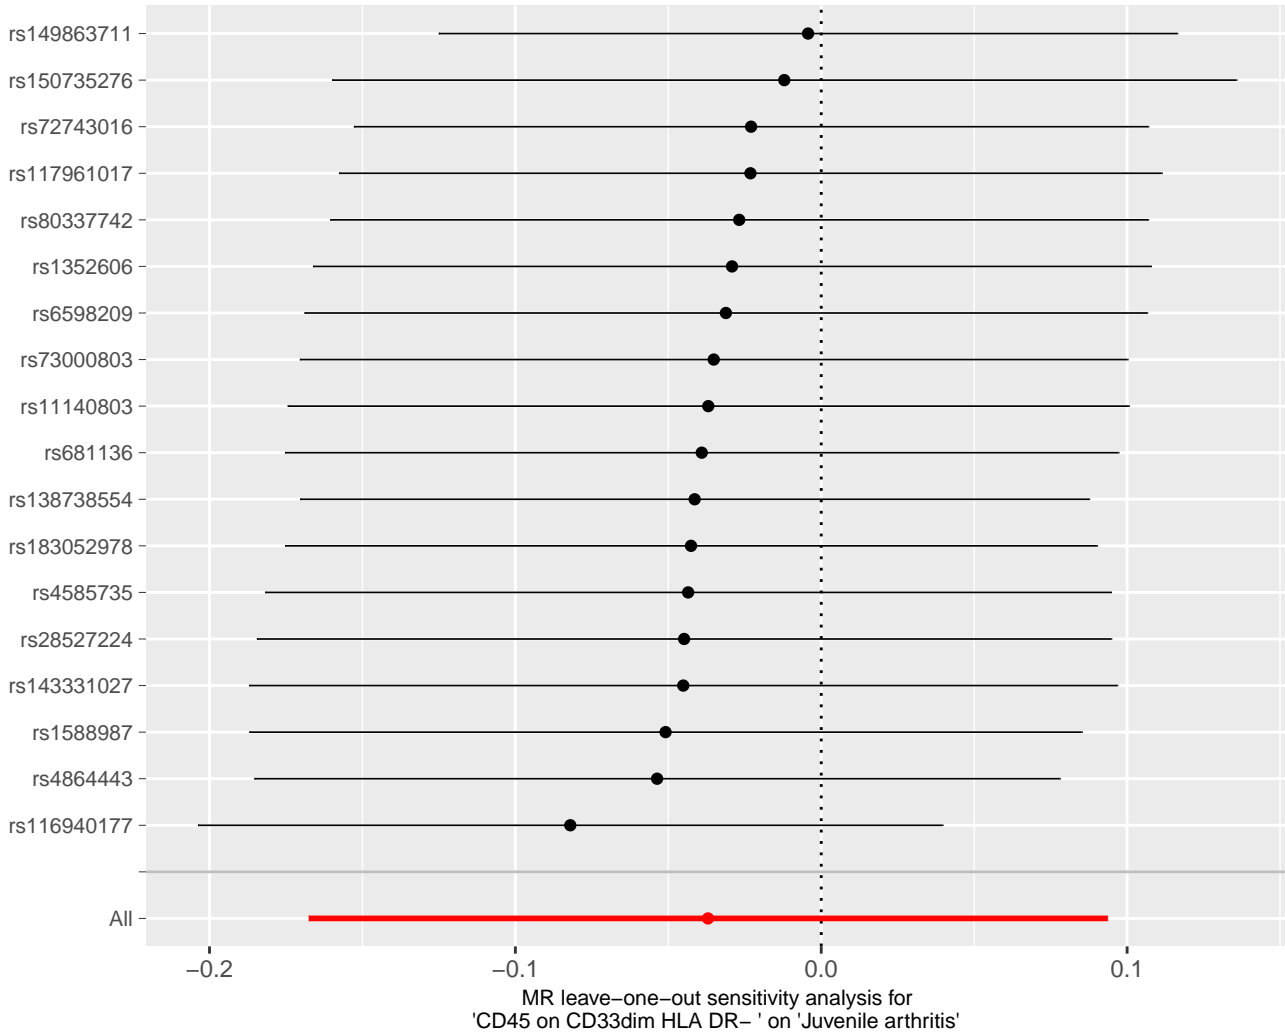

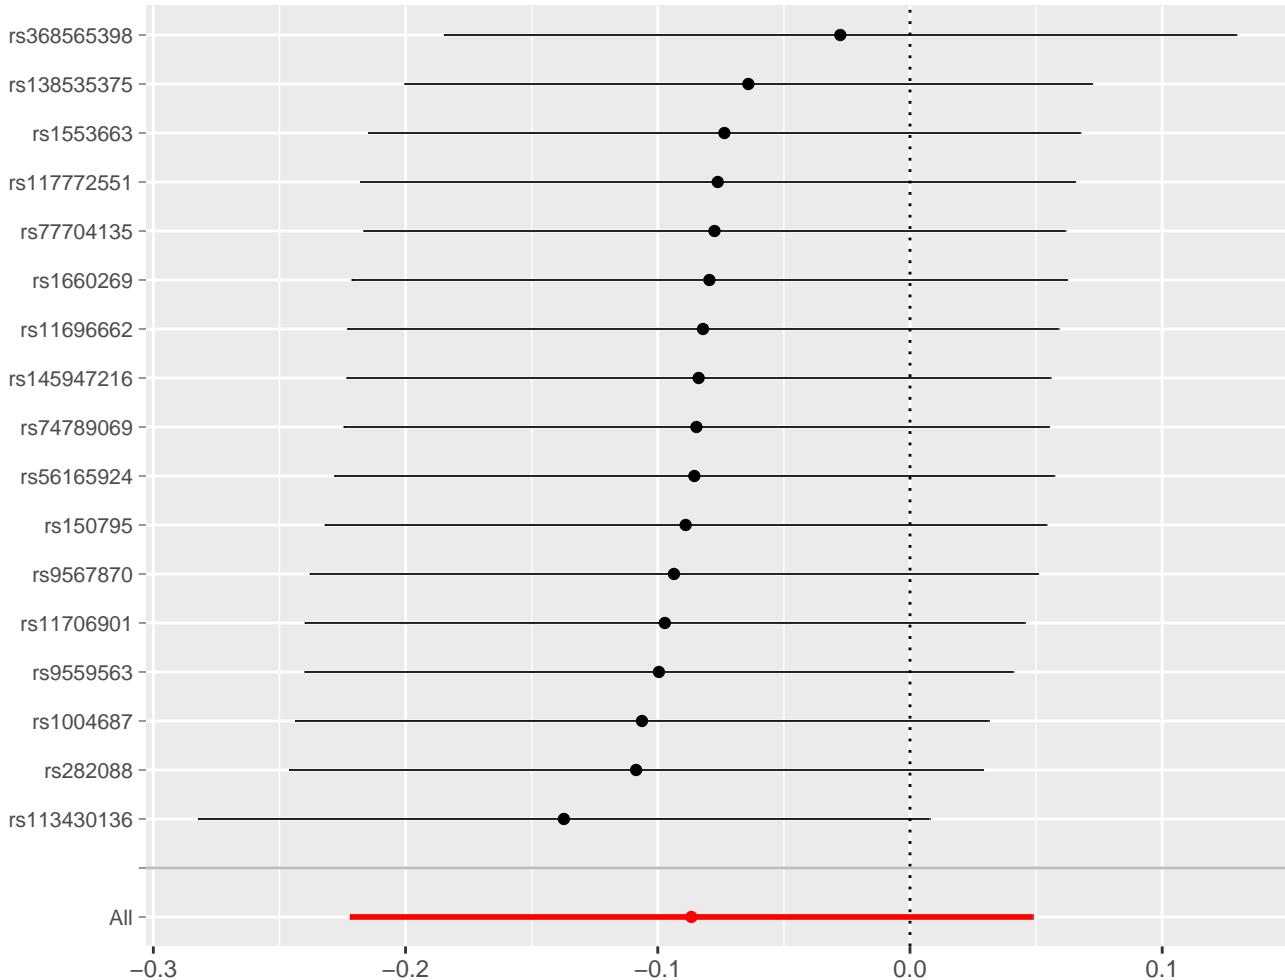

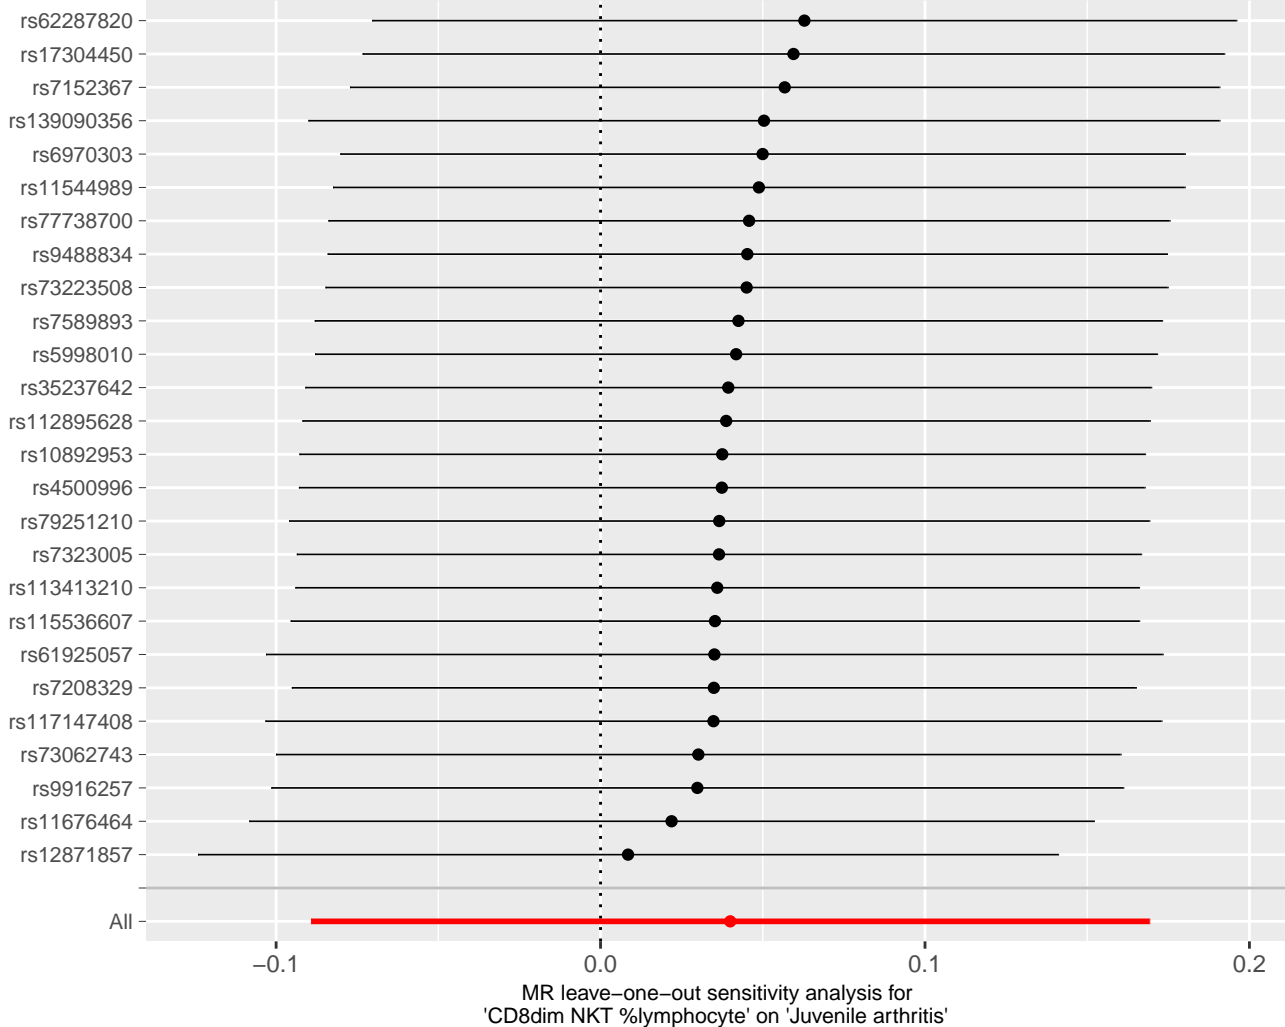

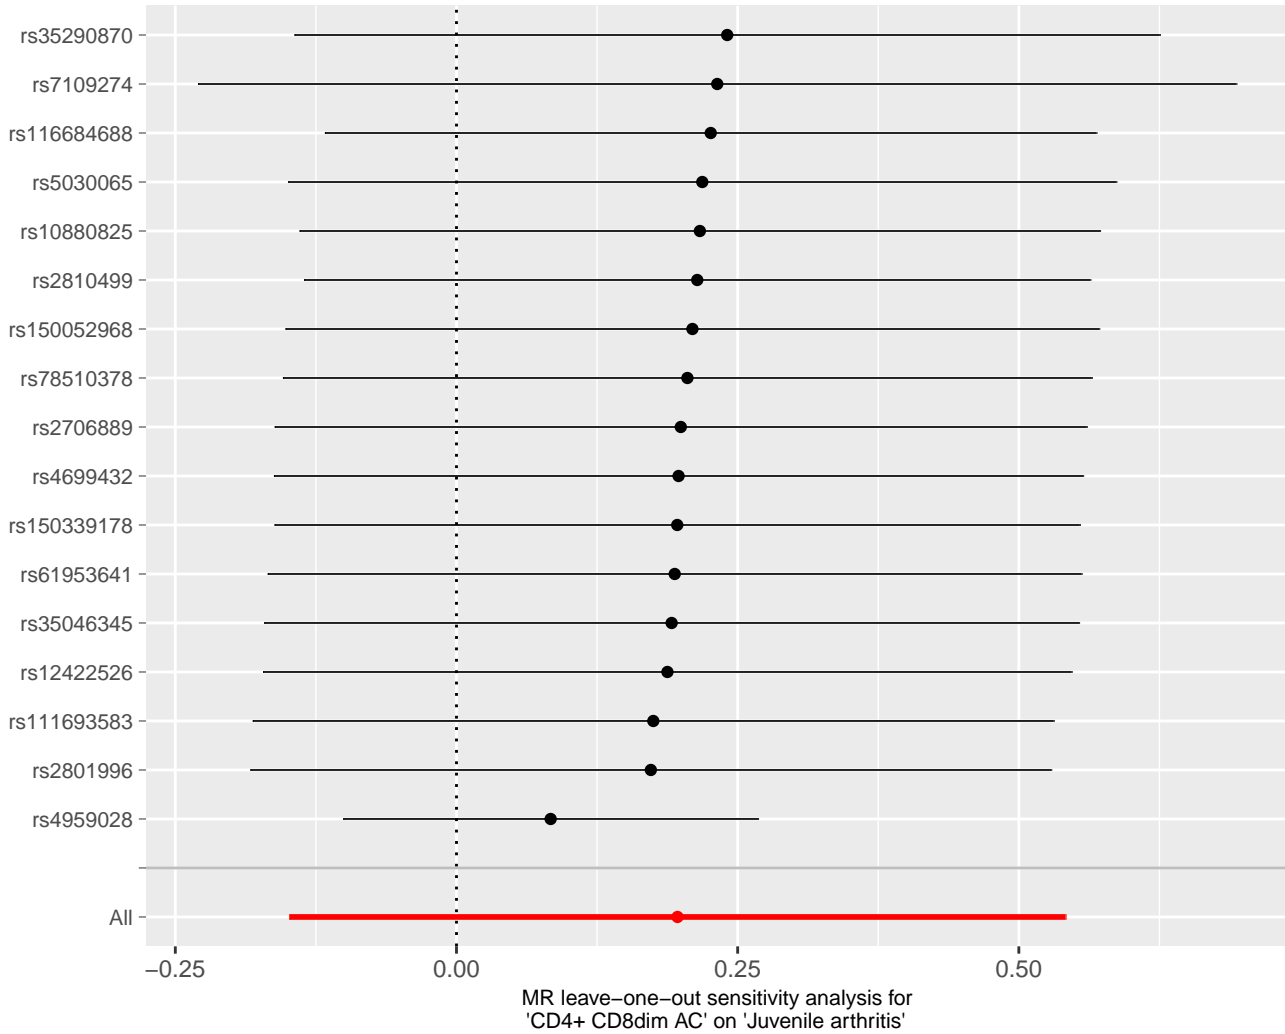

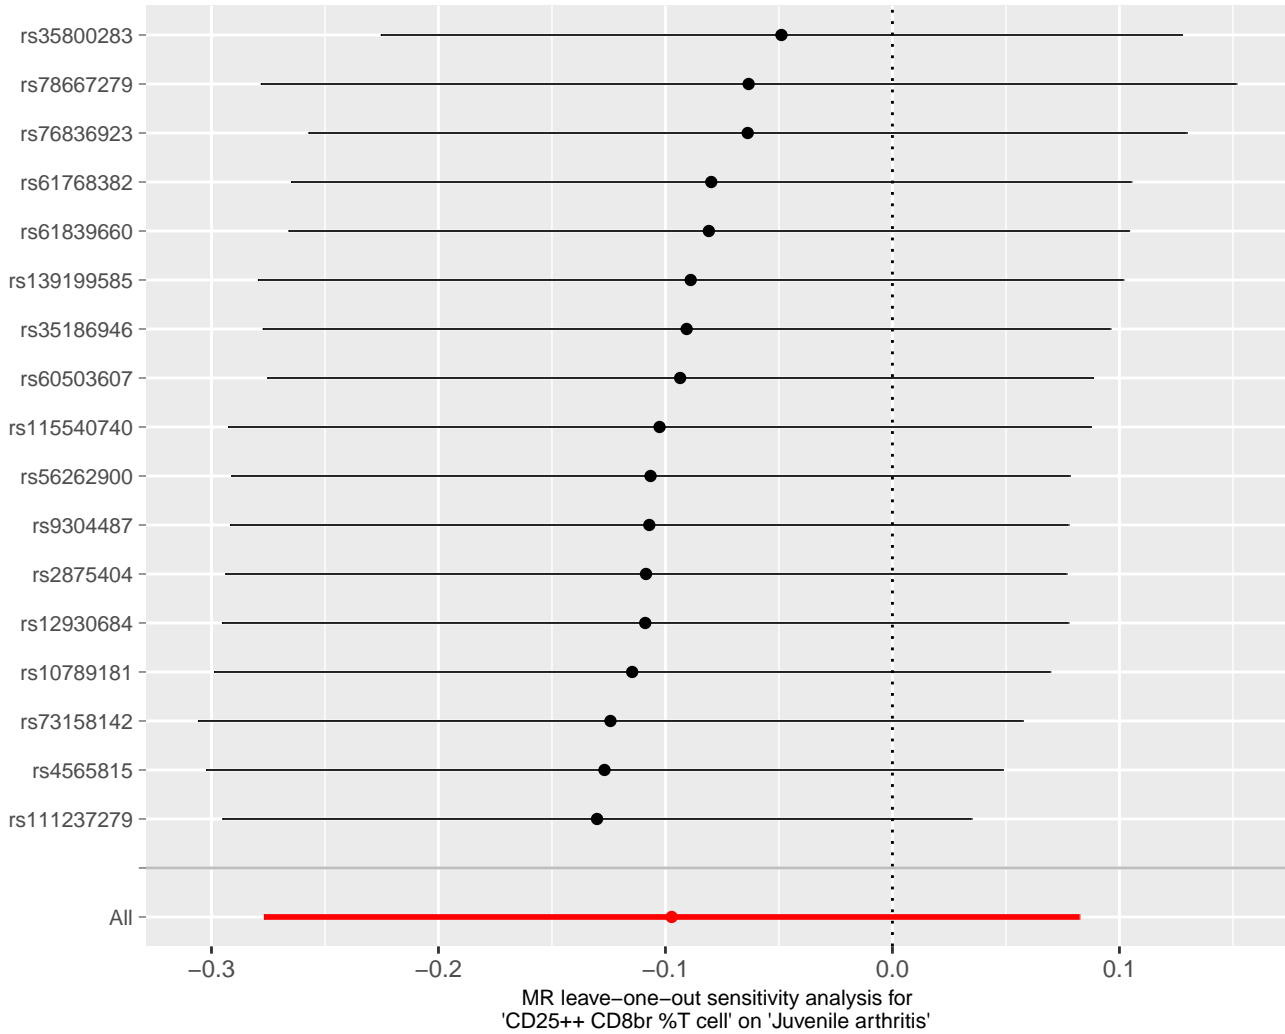



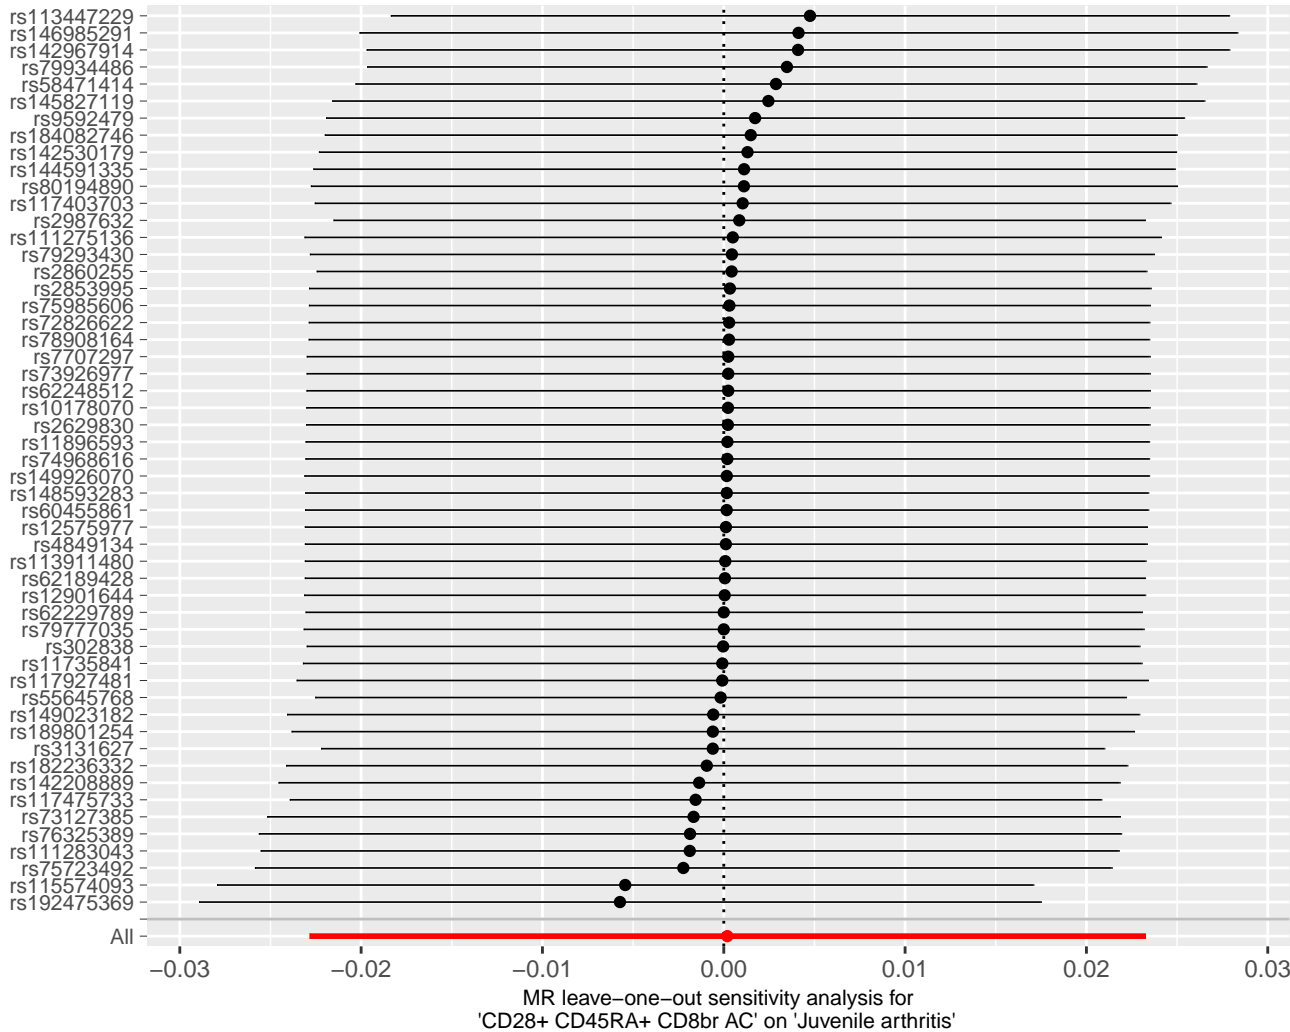

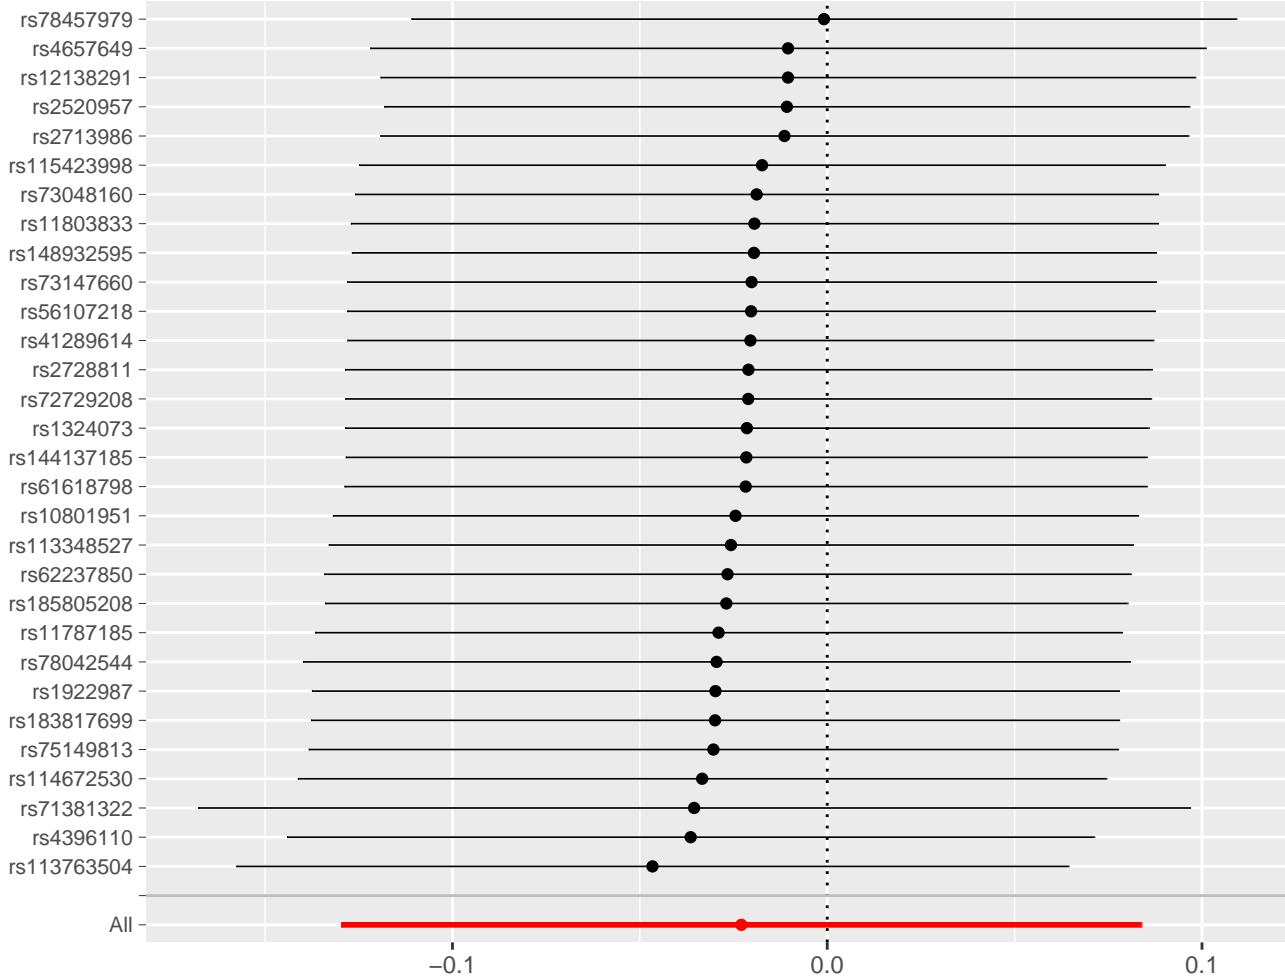

MR leave-one-out sensitivity analysis for 'CD3 on CD4+' on 'Juvenile arthritis'

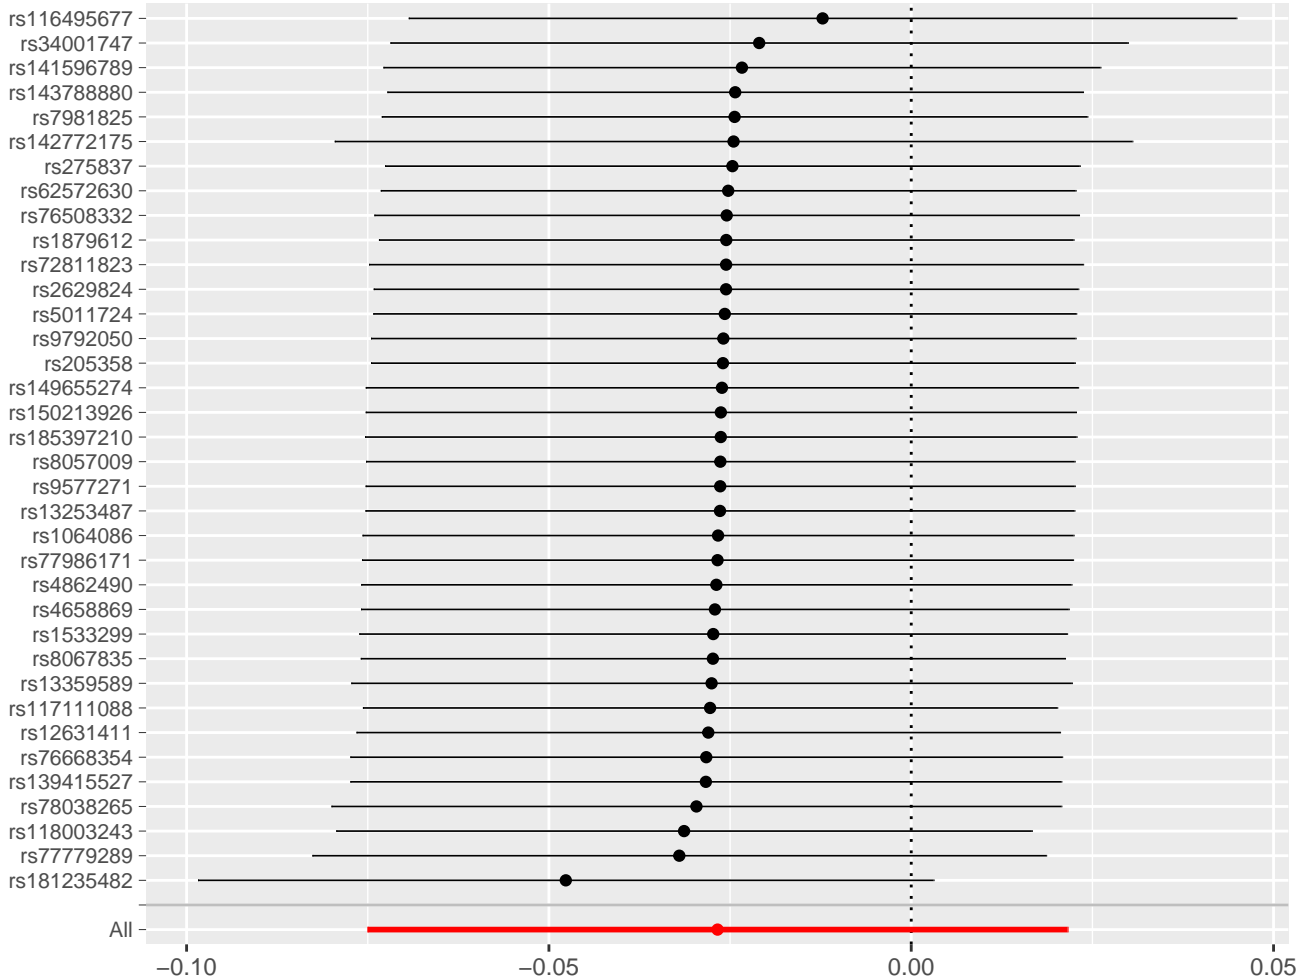

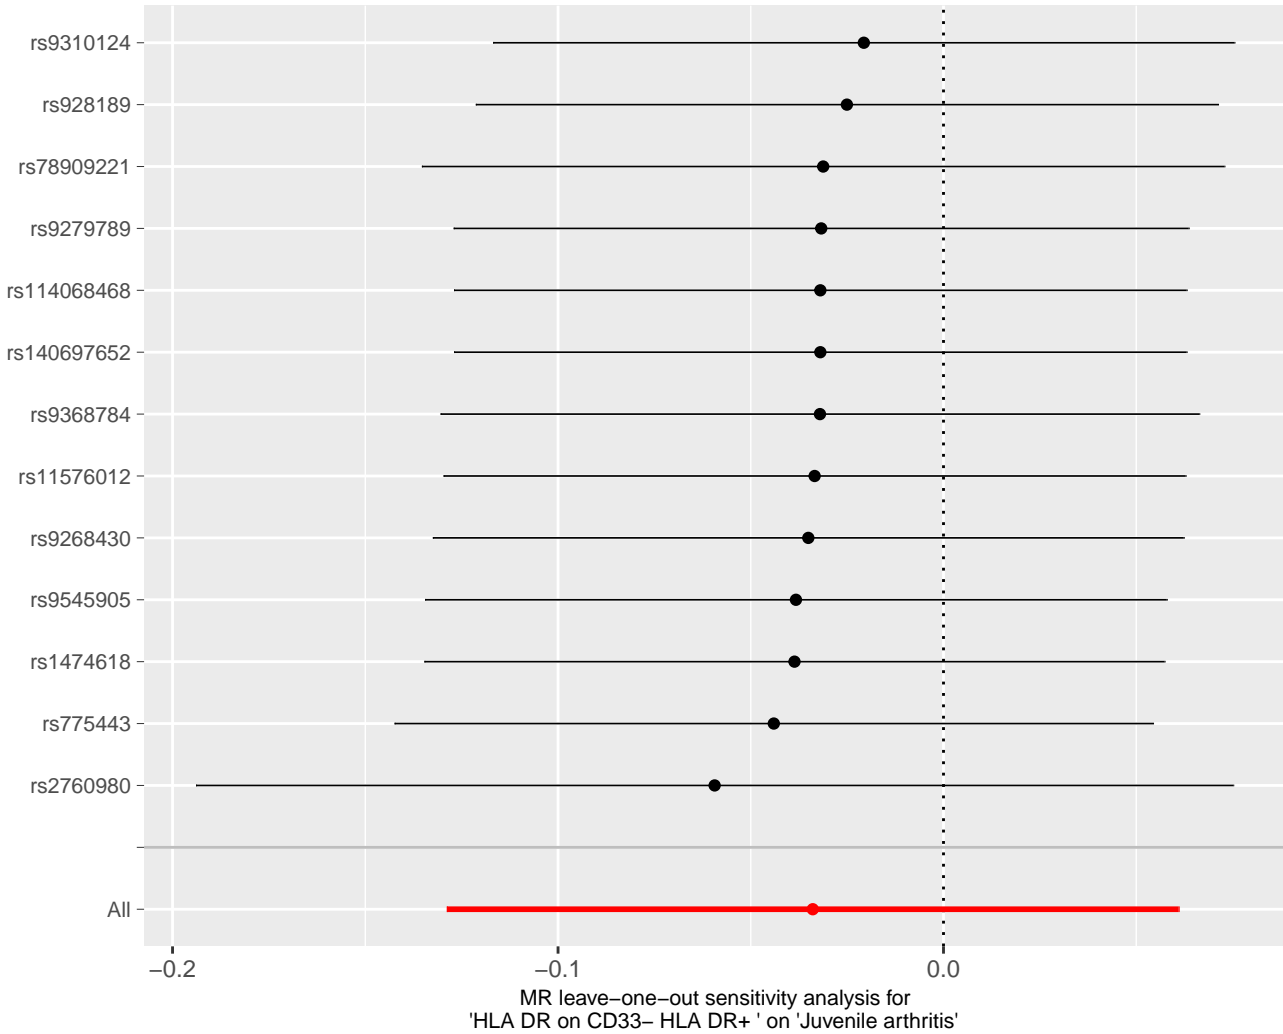

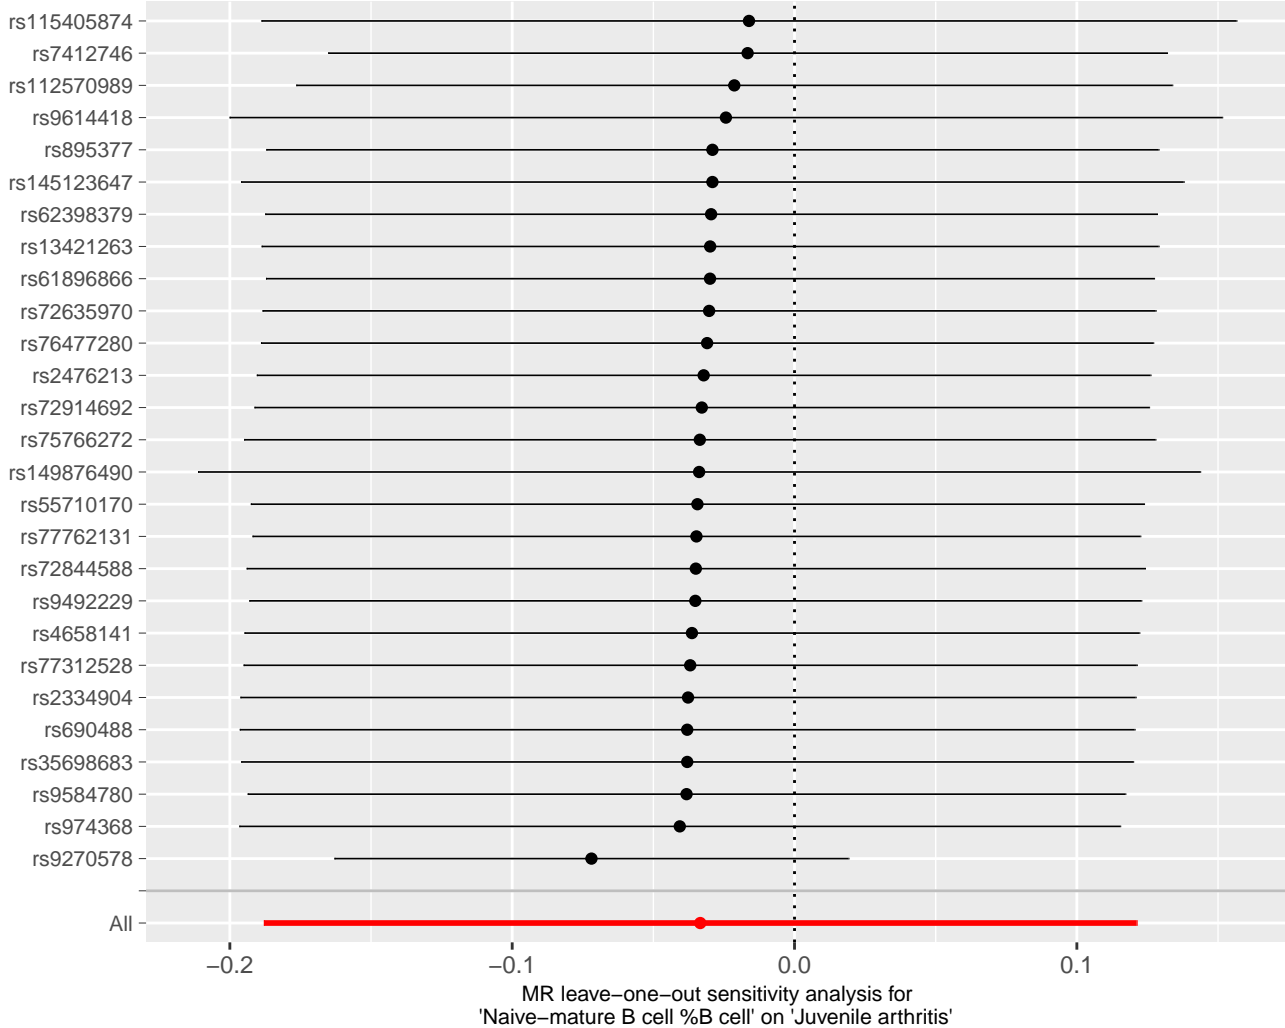

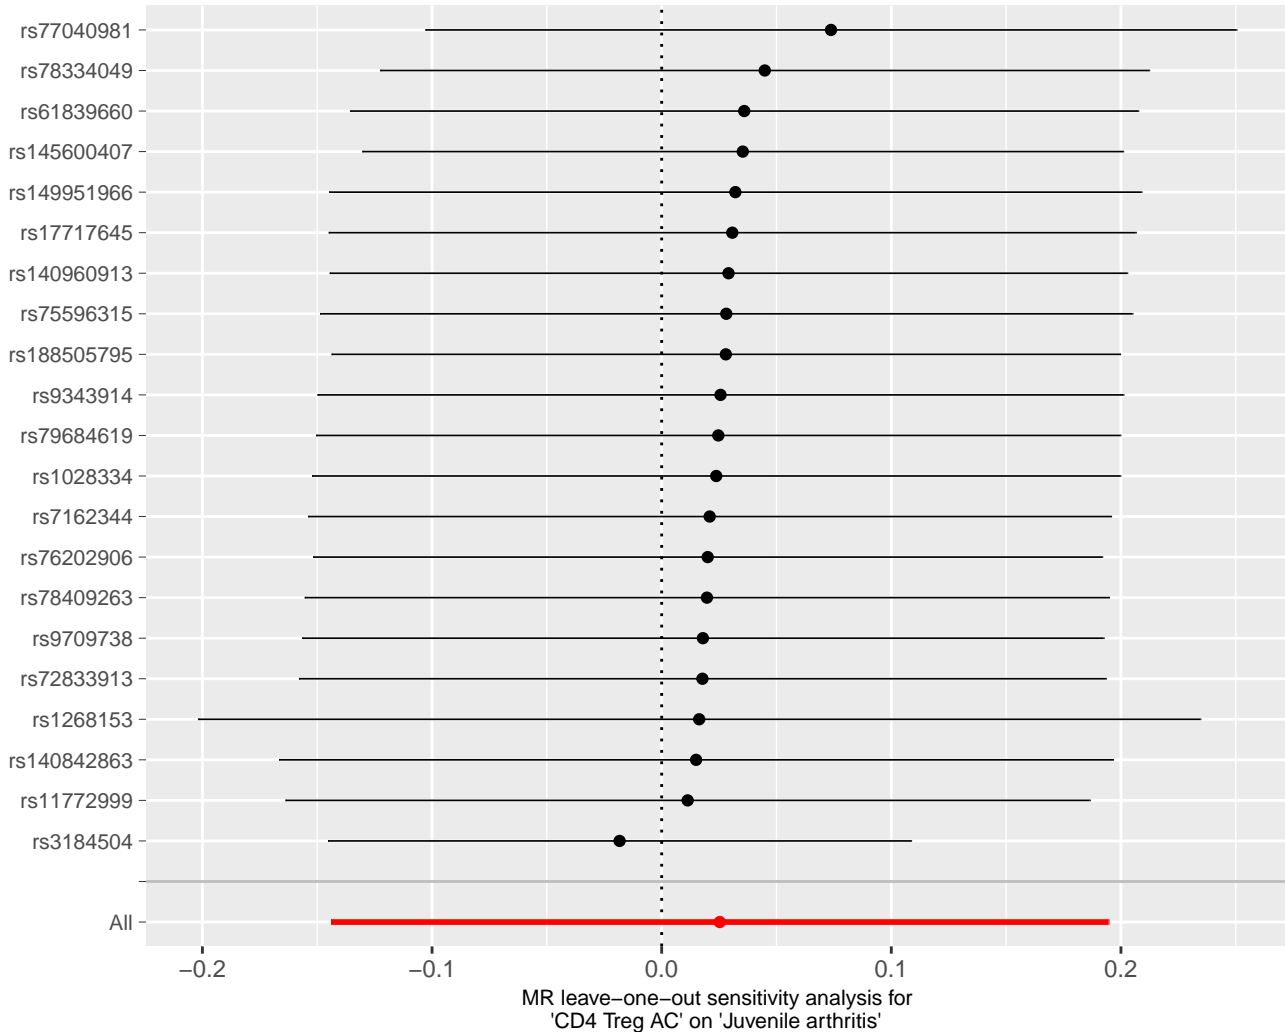

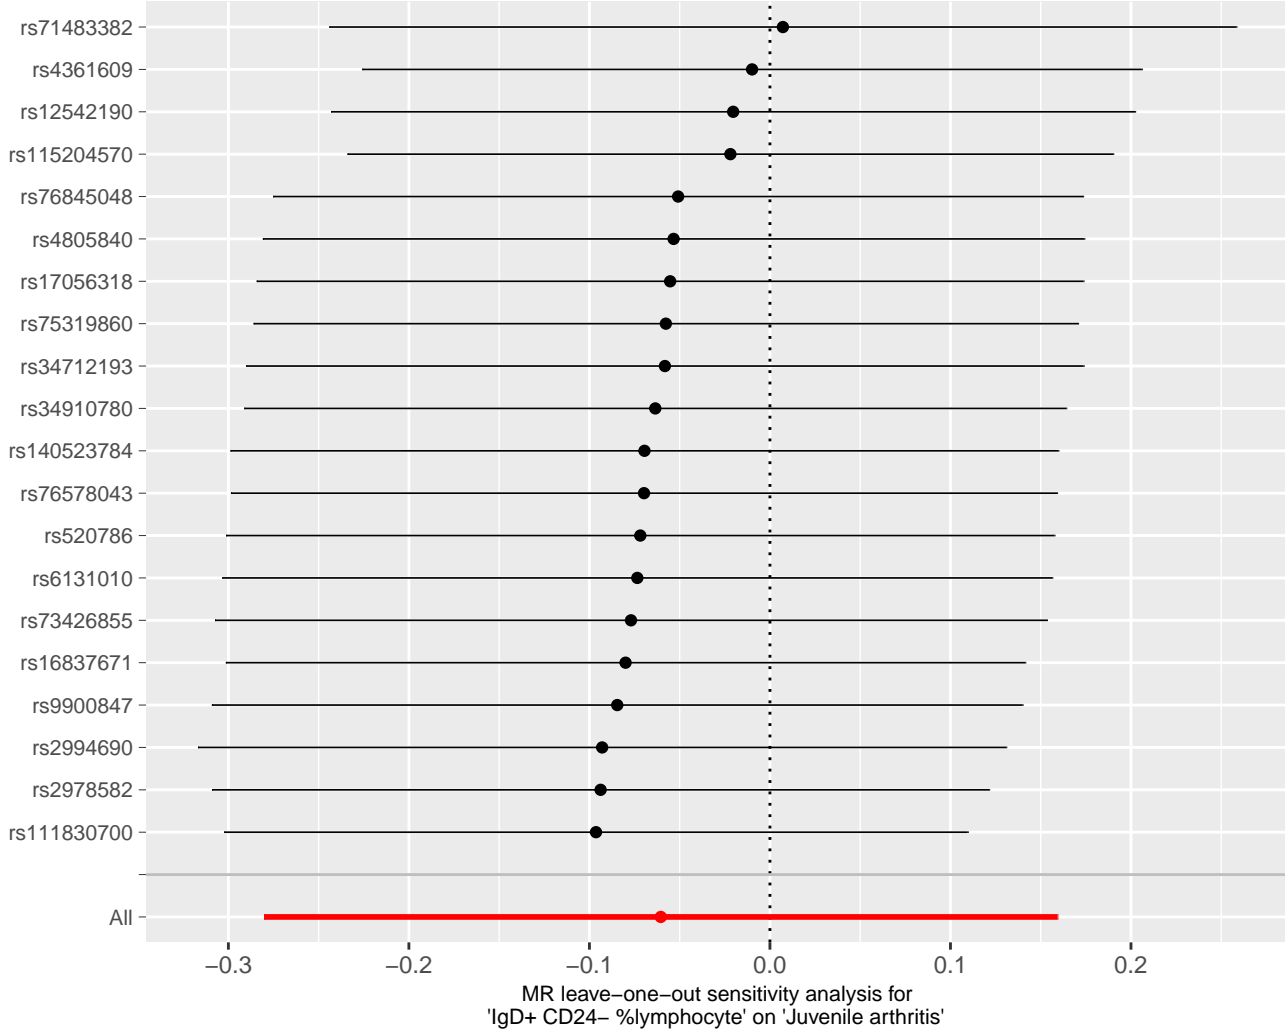

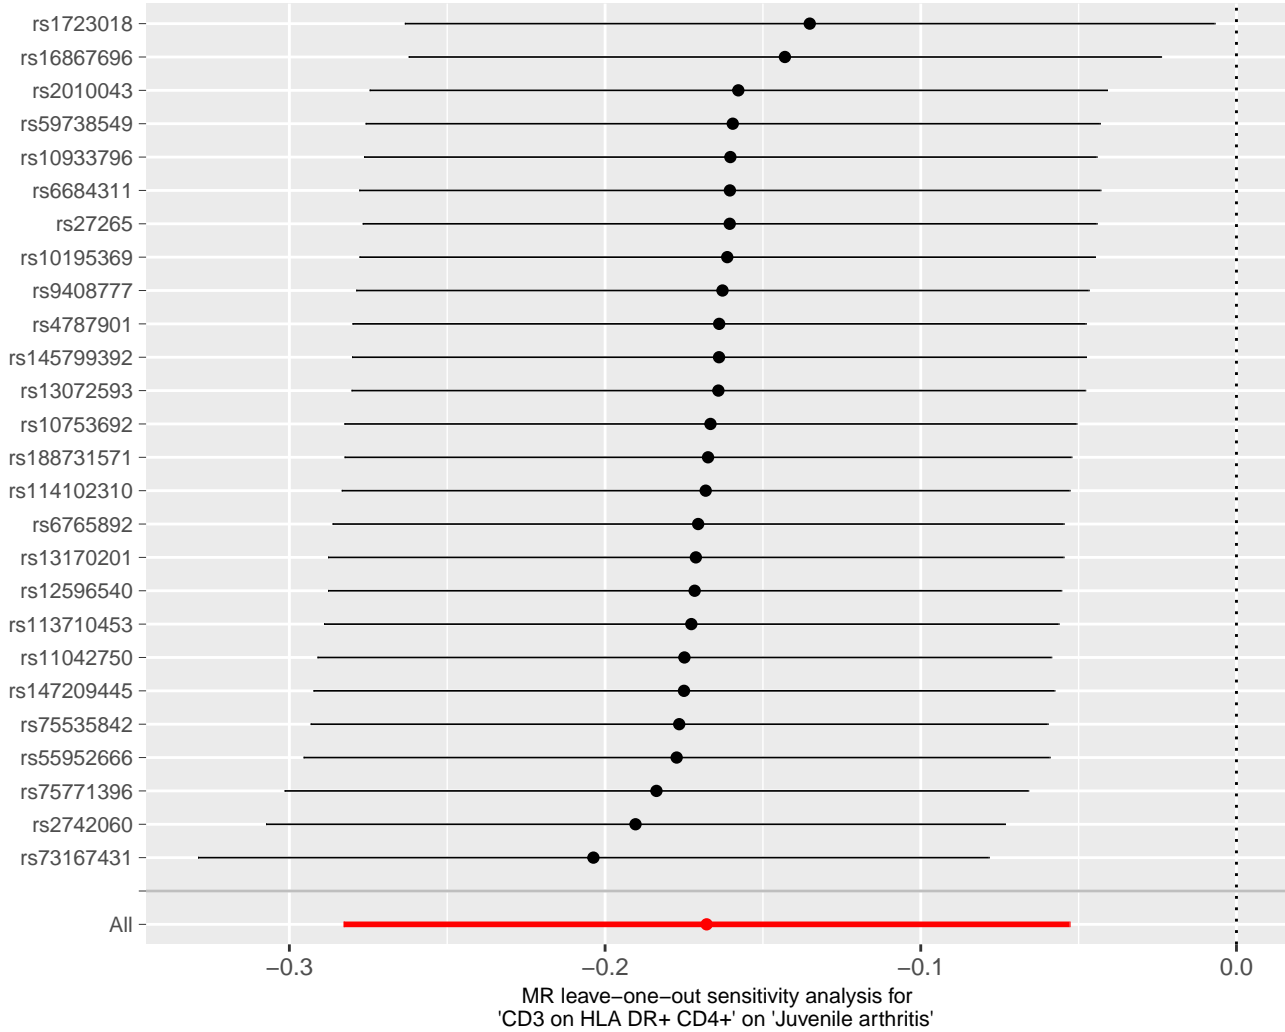



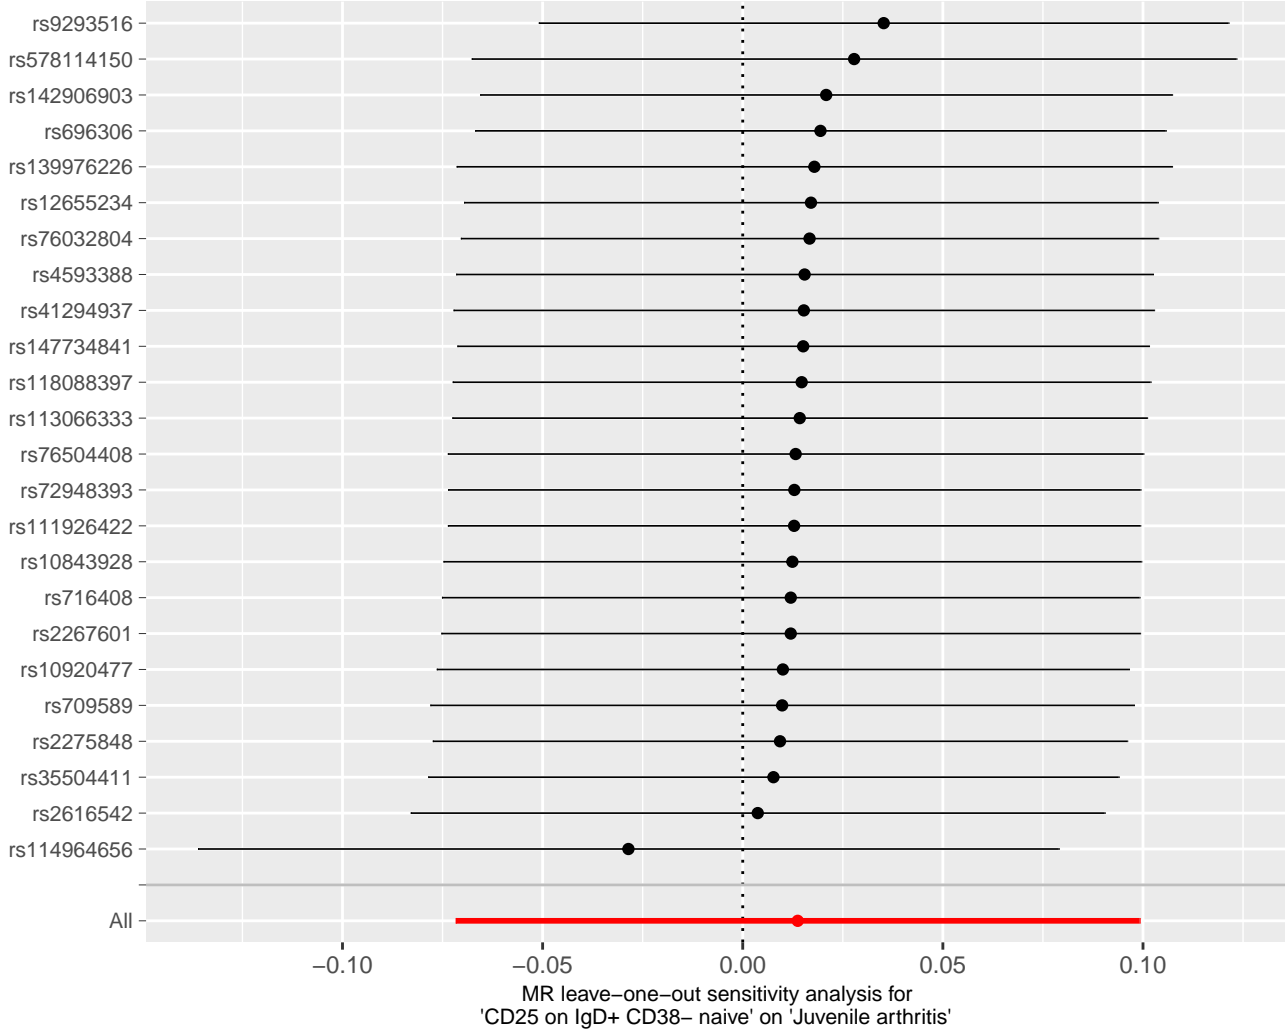

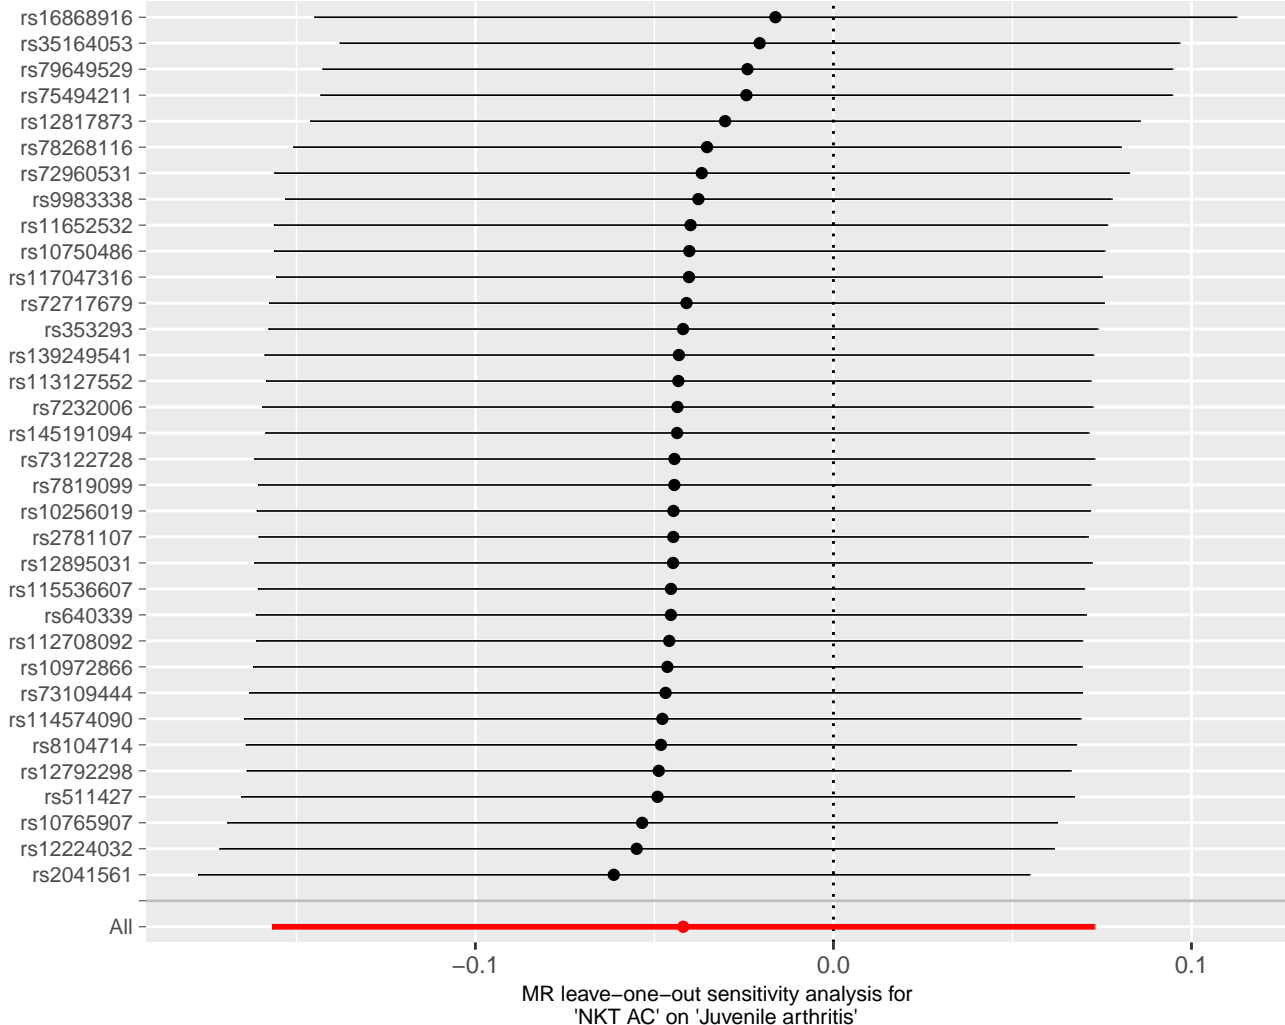

MR leave-one-out sensitivity analysis for 'NKT AC' on 'Juvenile arthritis'

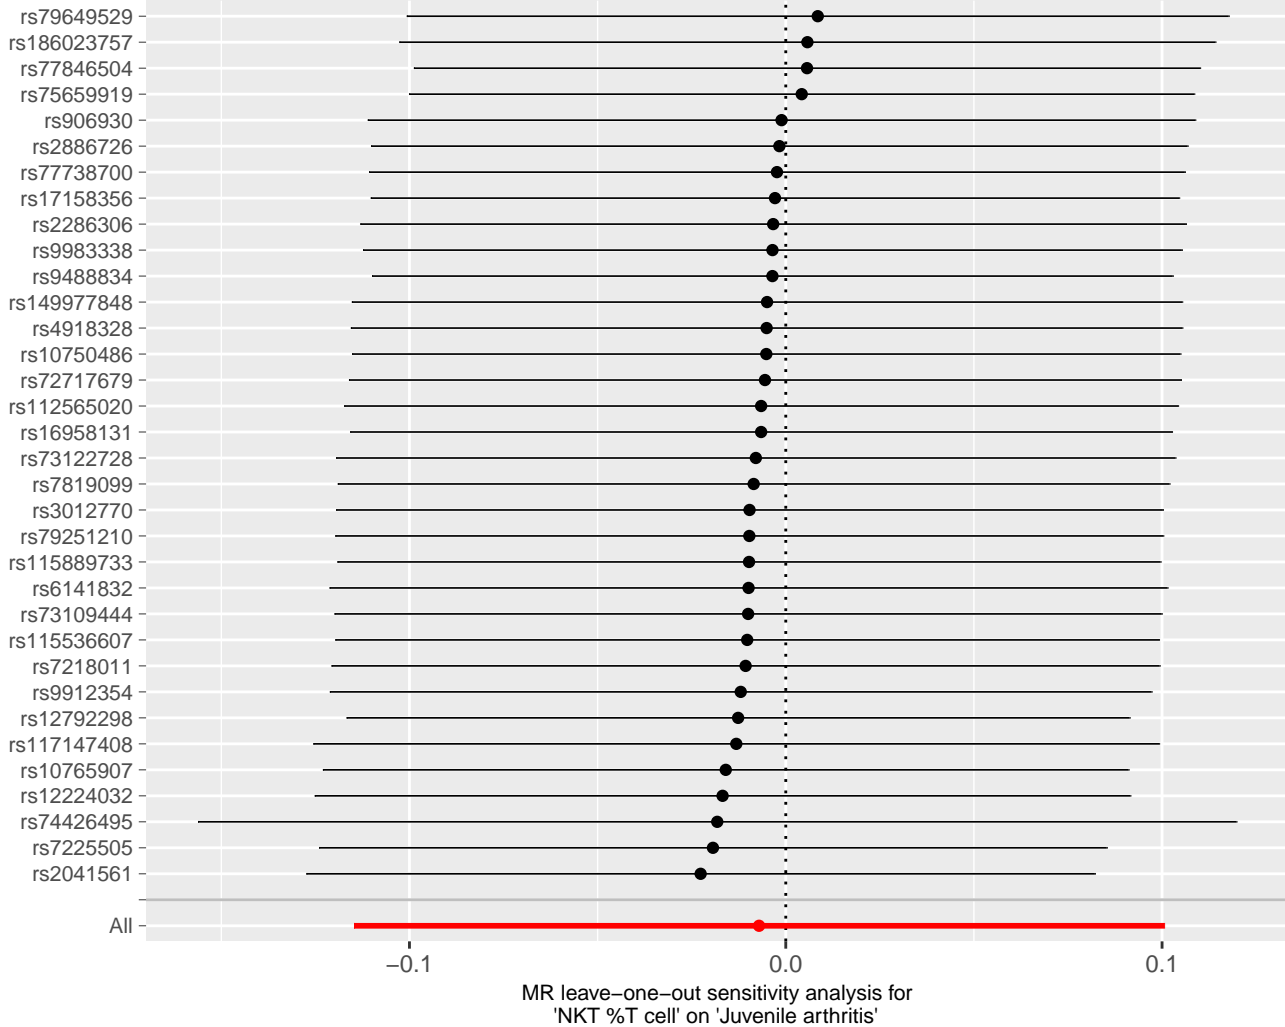

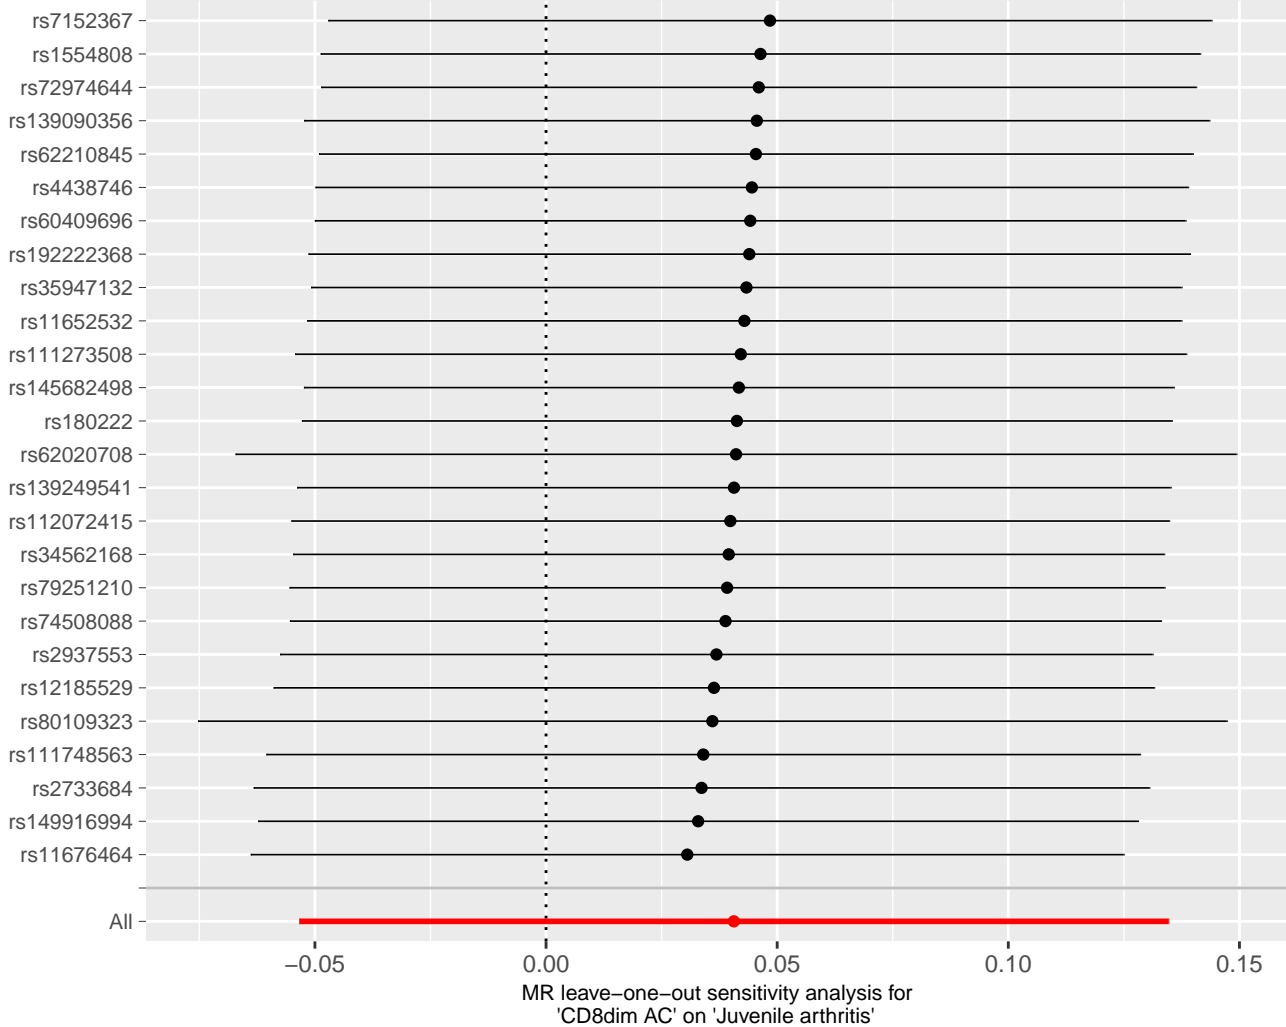

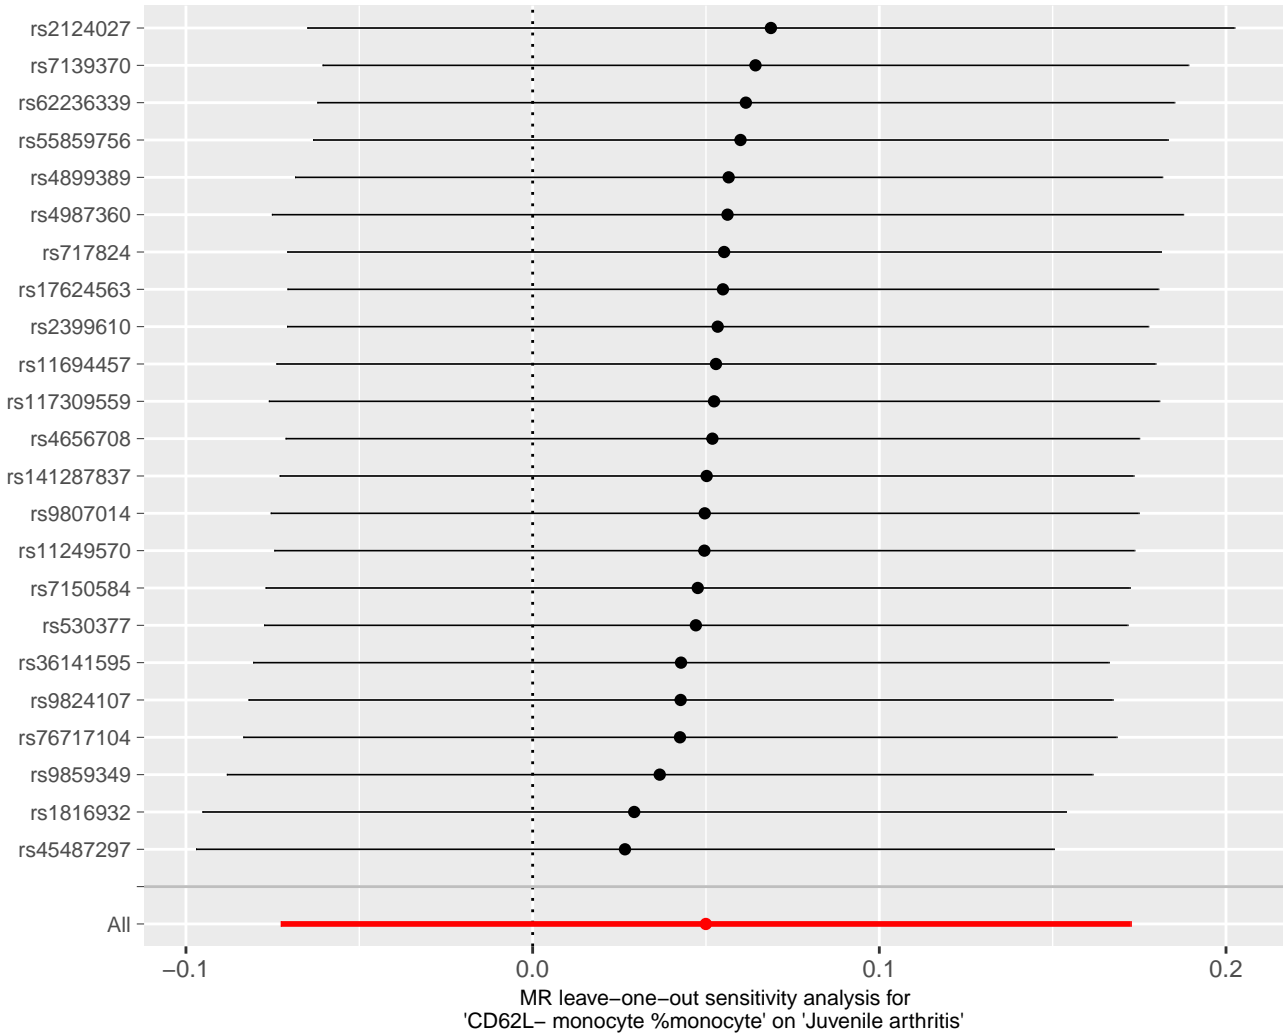

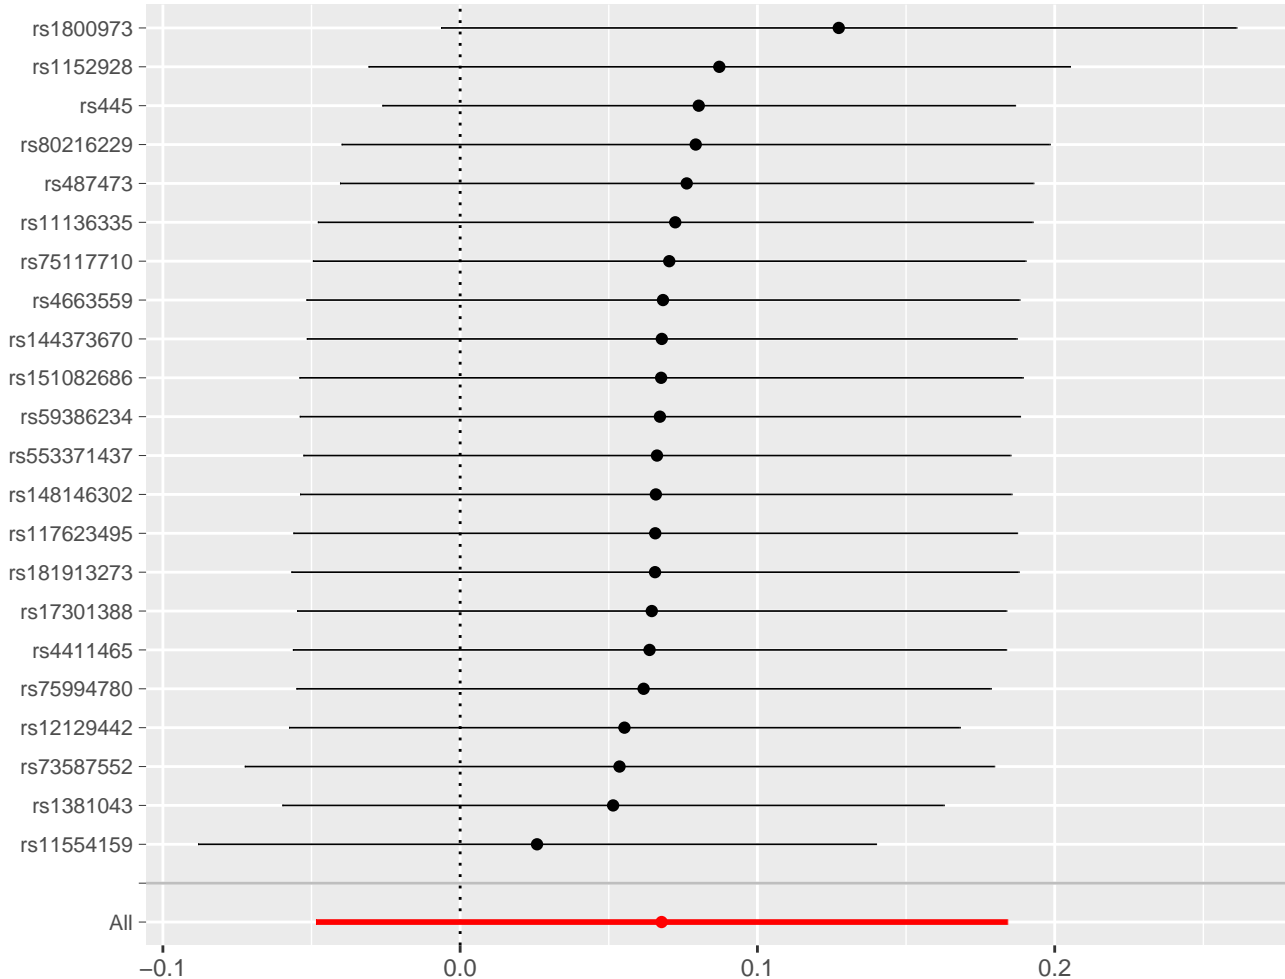

MR leave-one-out sensitivity analysis for 'SSC-A on monocyte' on 'Juvenile arthritis'

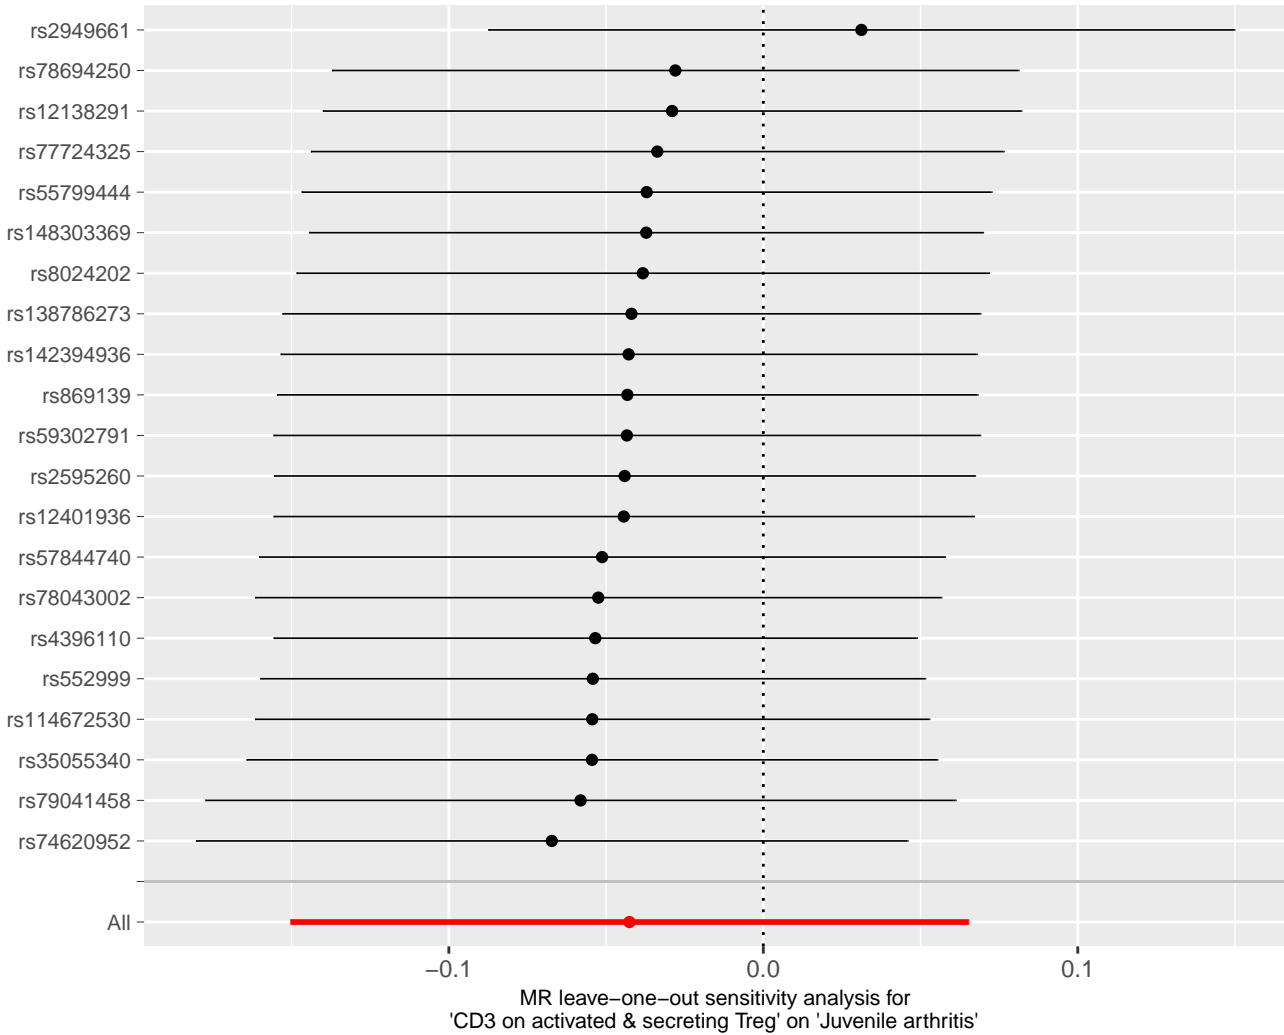

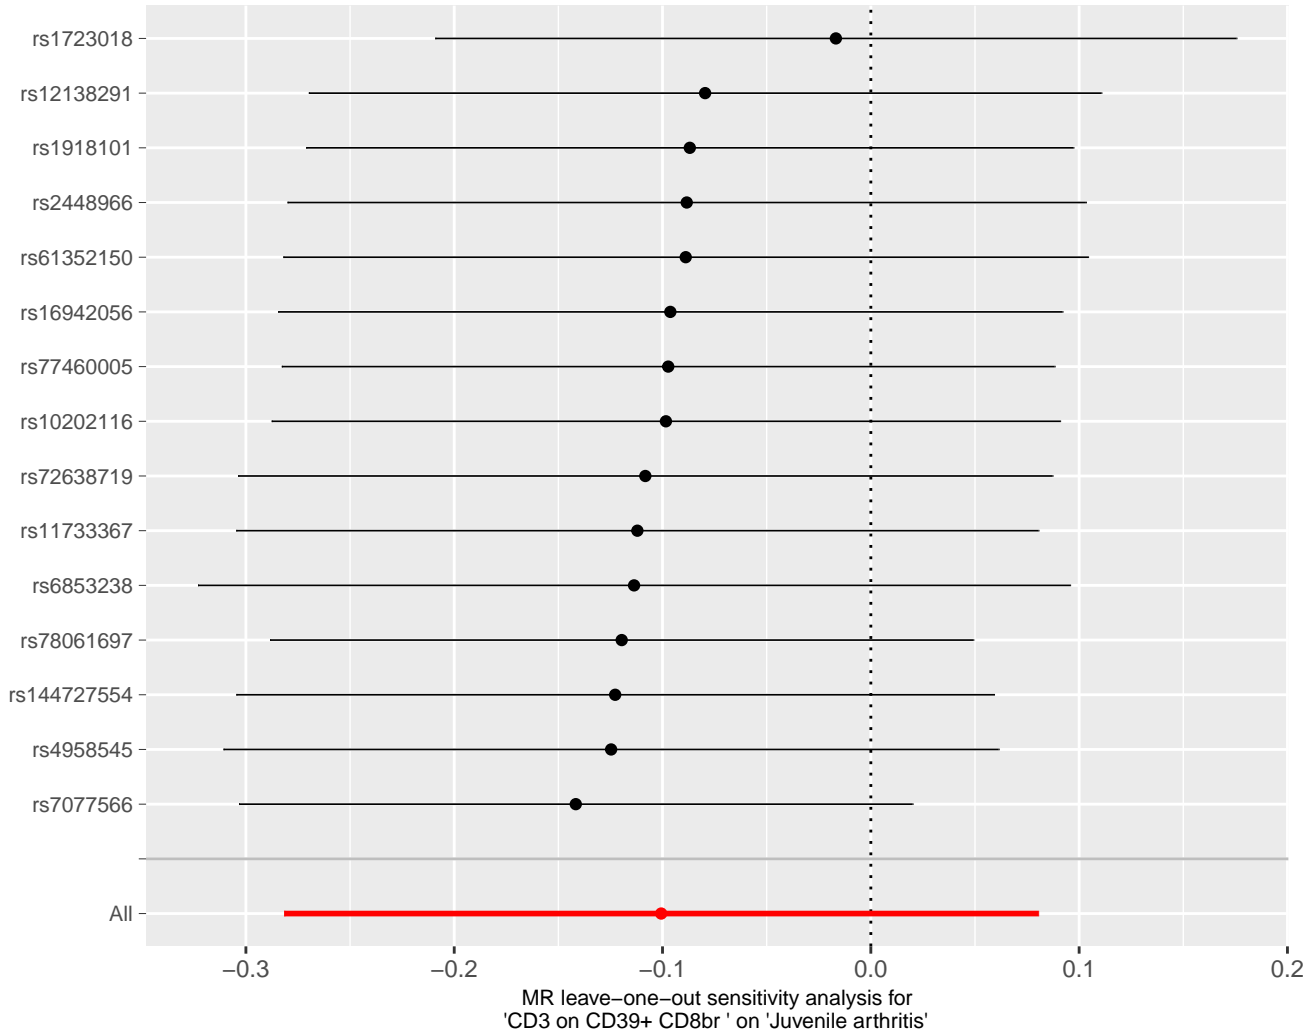



rs113934809

rs34719184

rs1471412

All

-0.4

0.0

0.4

MR leave-one-out sensitivity analysis for  
'CD24 on CD24+ CD27+' on 'Juvenile arthritis'

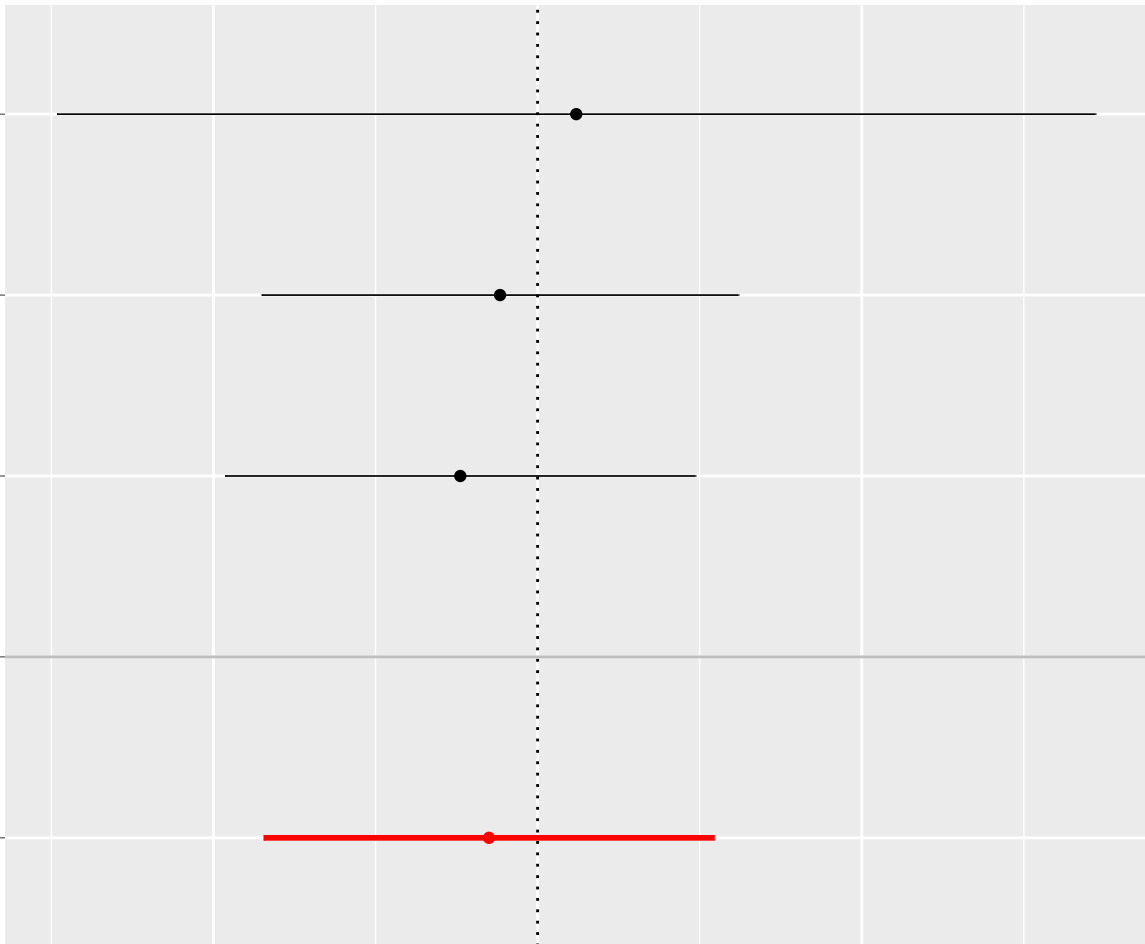

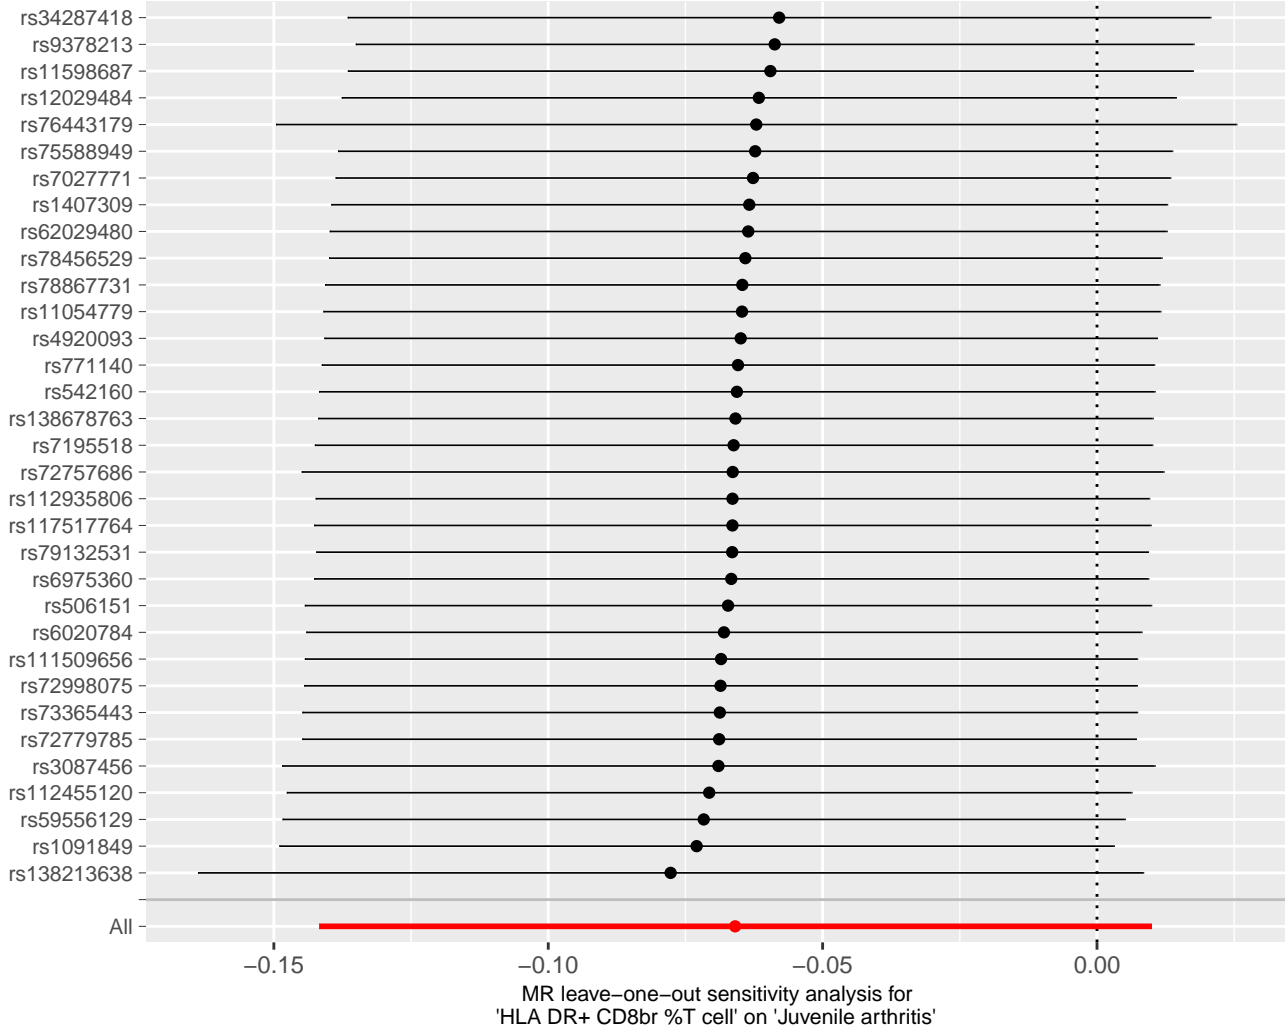

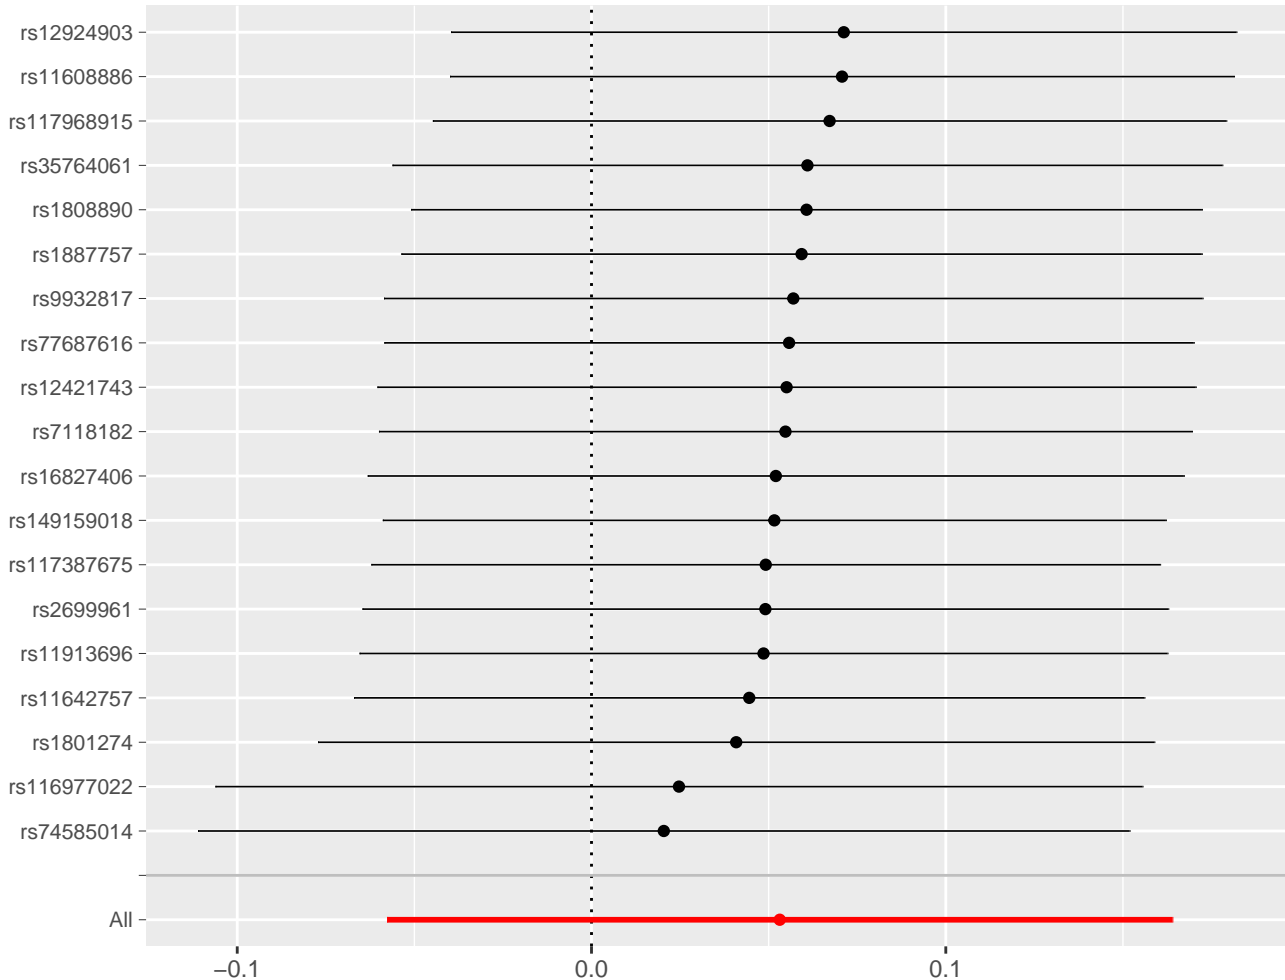

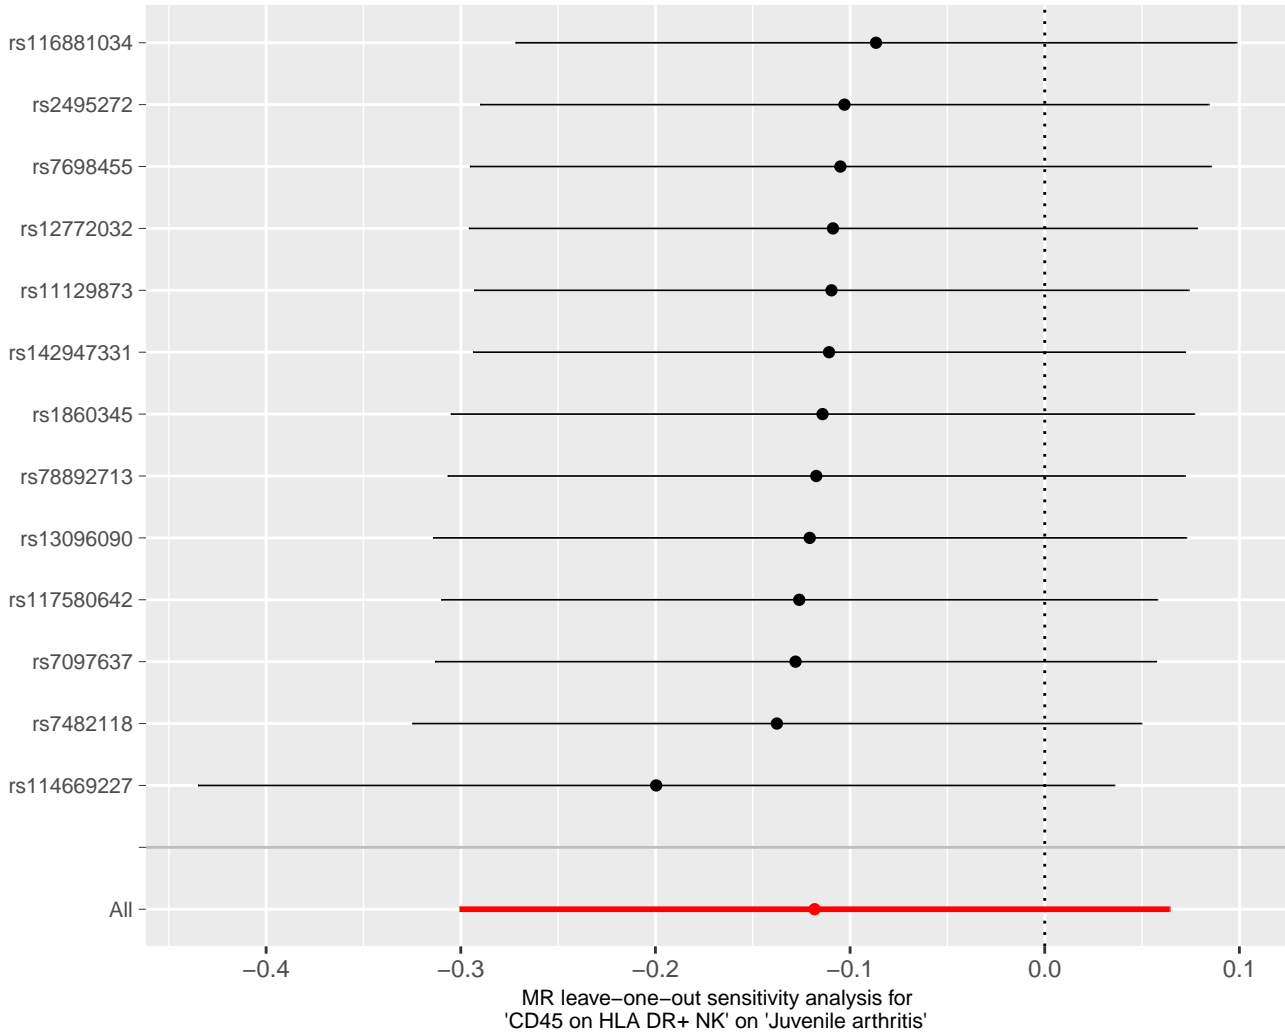

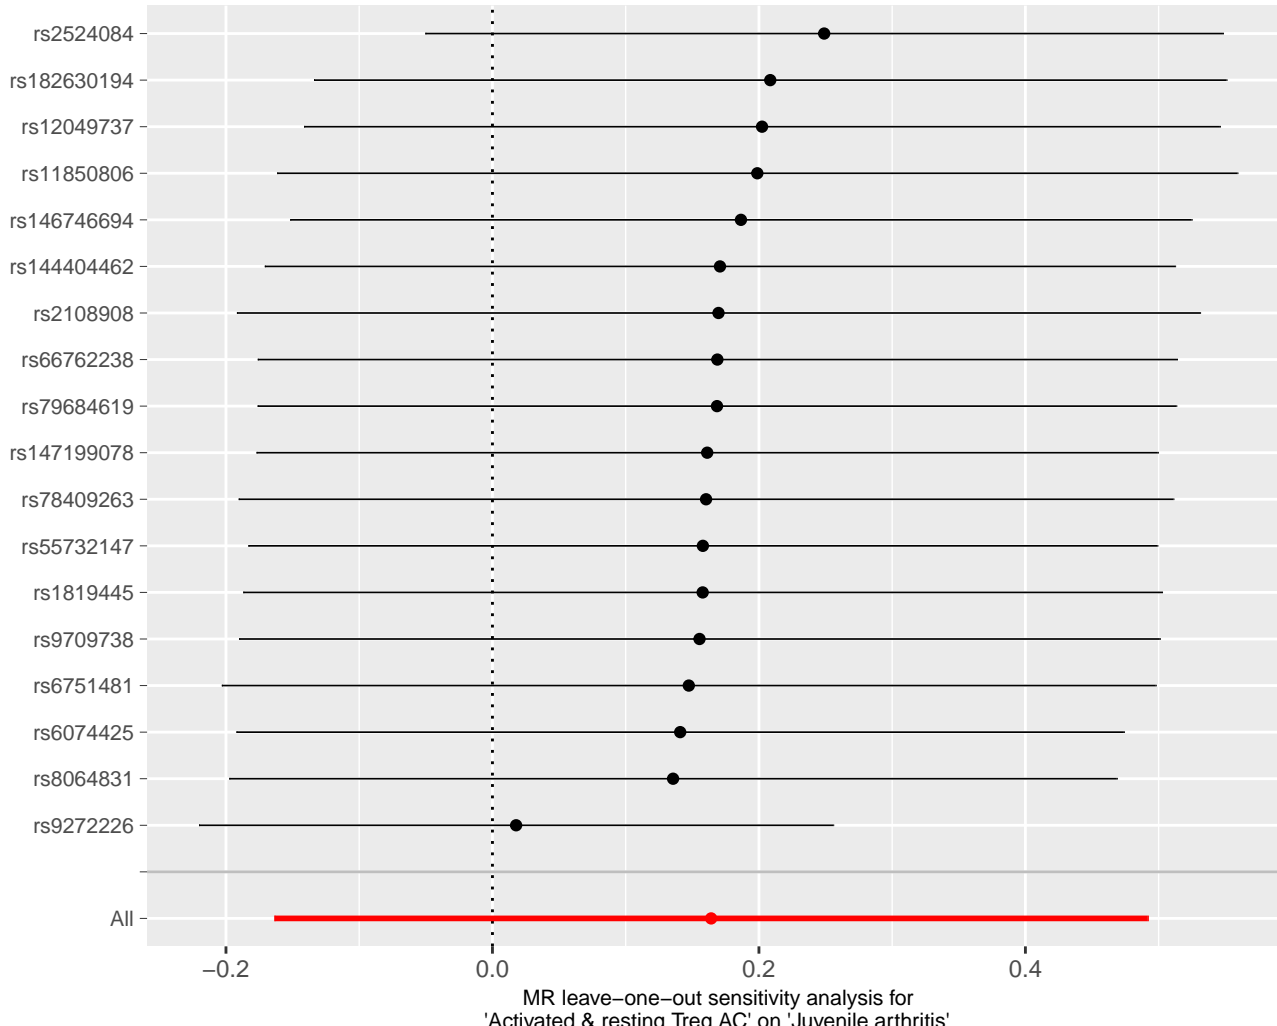

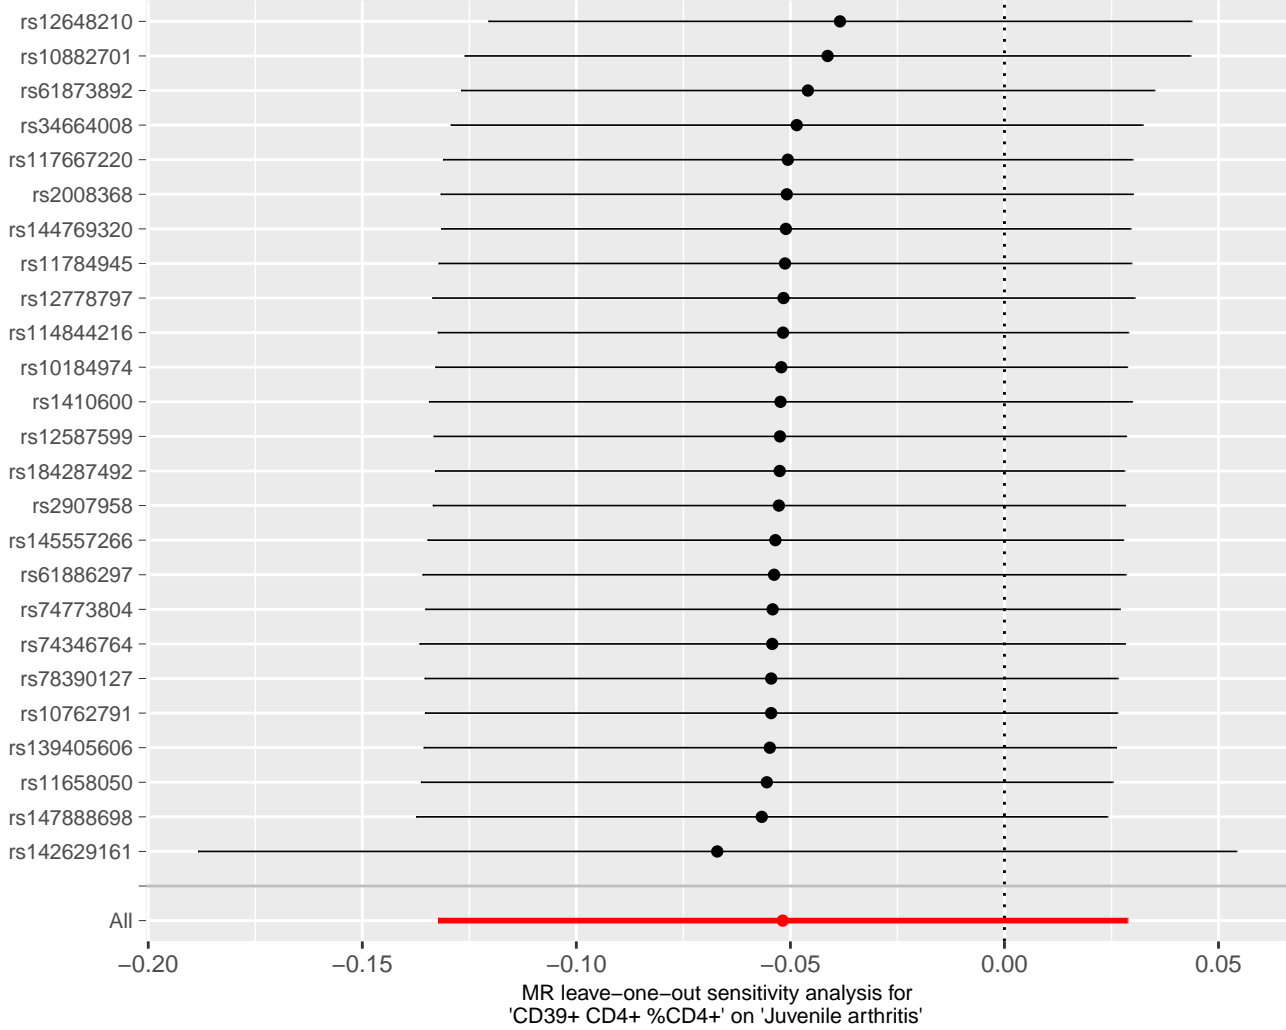

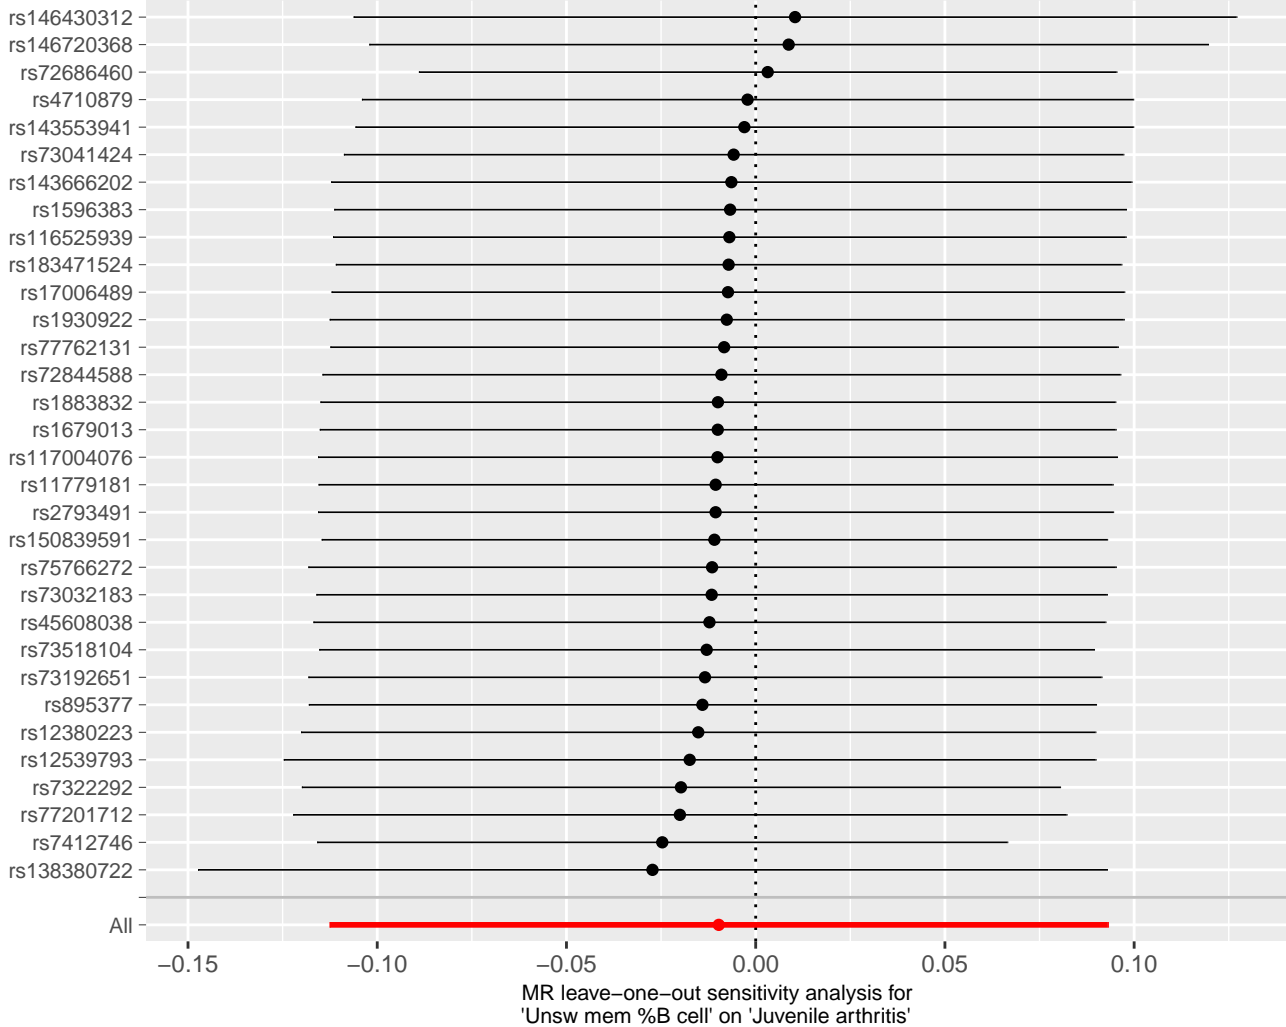

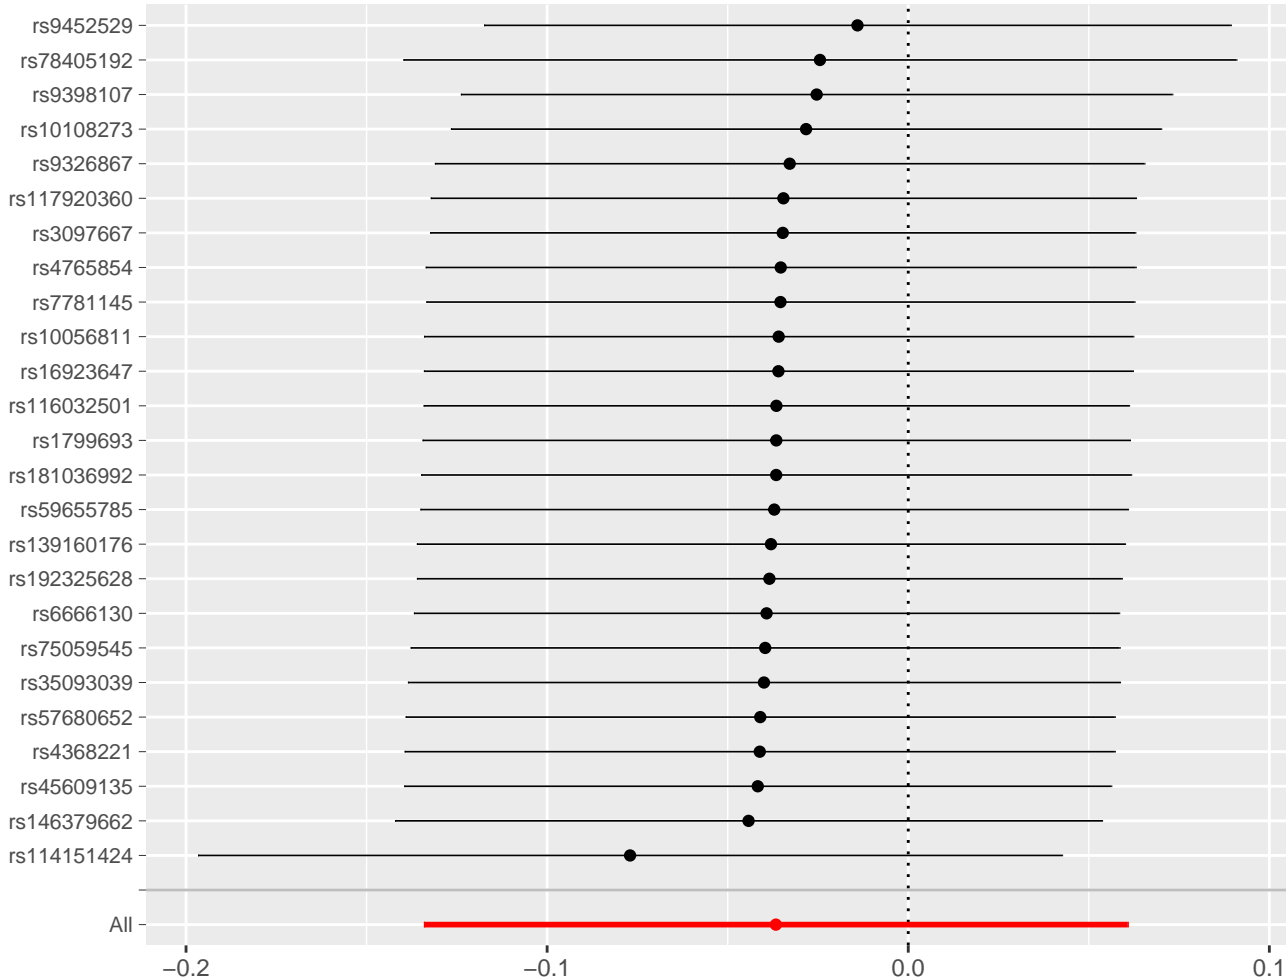

MR leave-one-out sensitivity analysis for 'CD24 on IgD+ CD38br' on 'Juvenile arthritis'



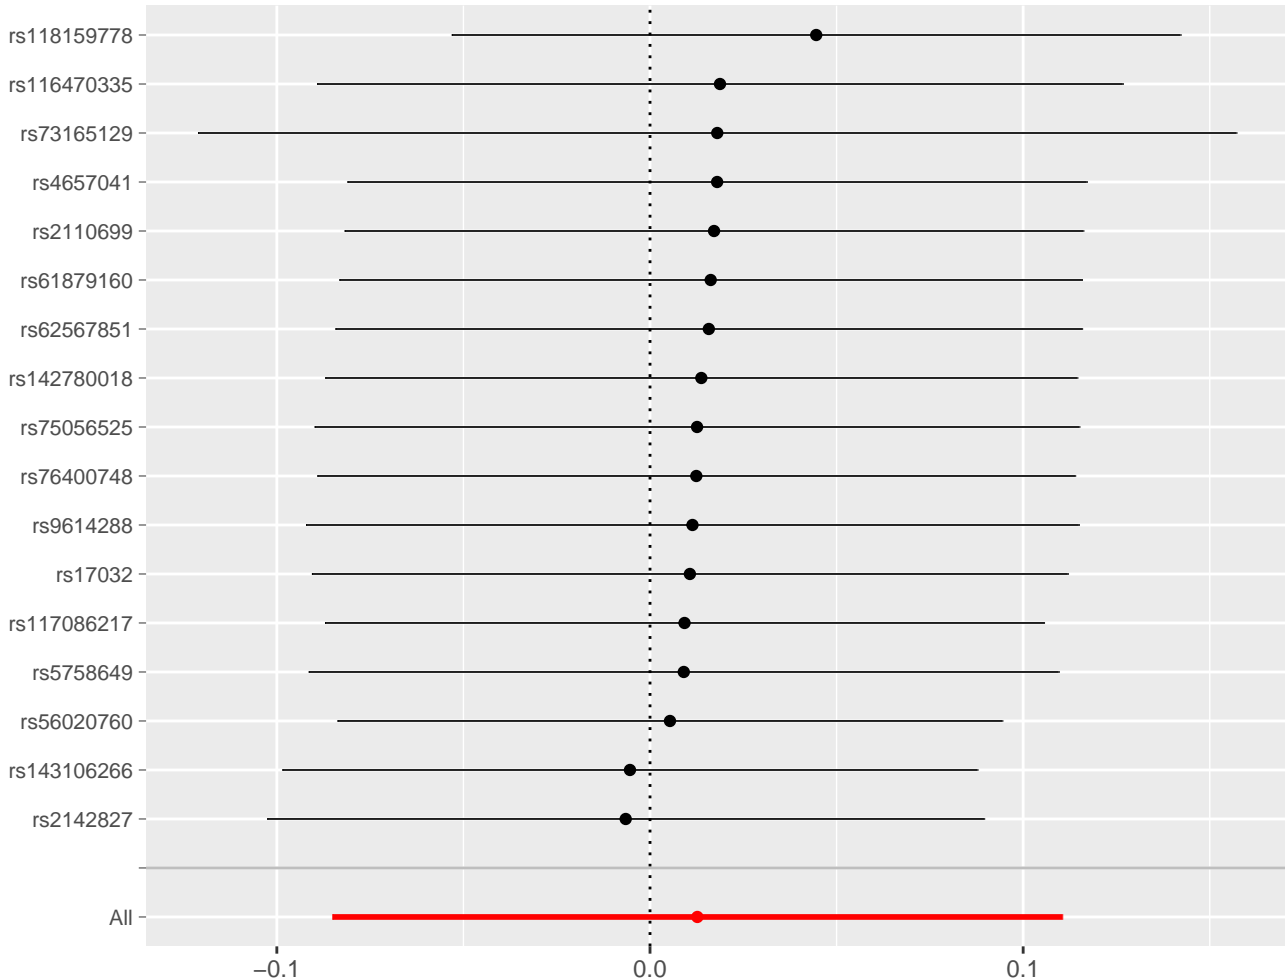

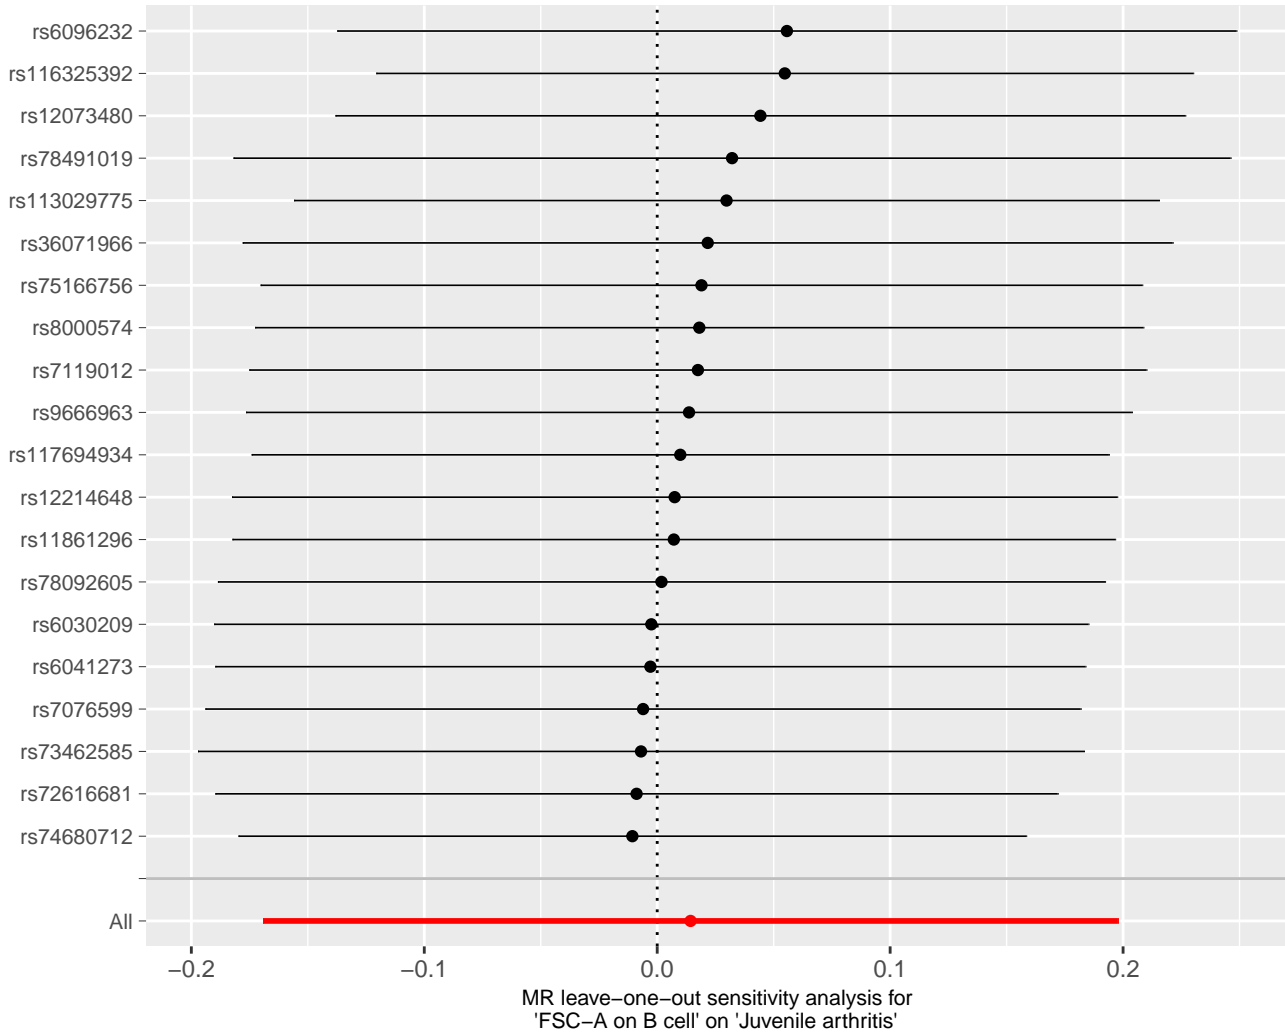

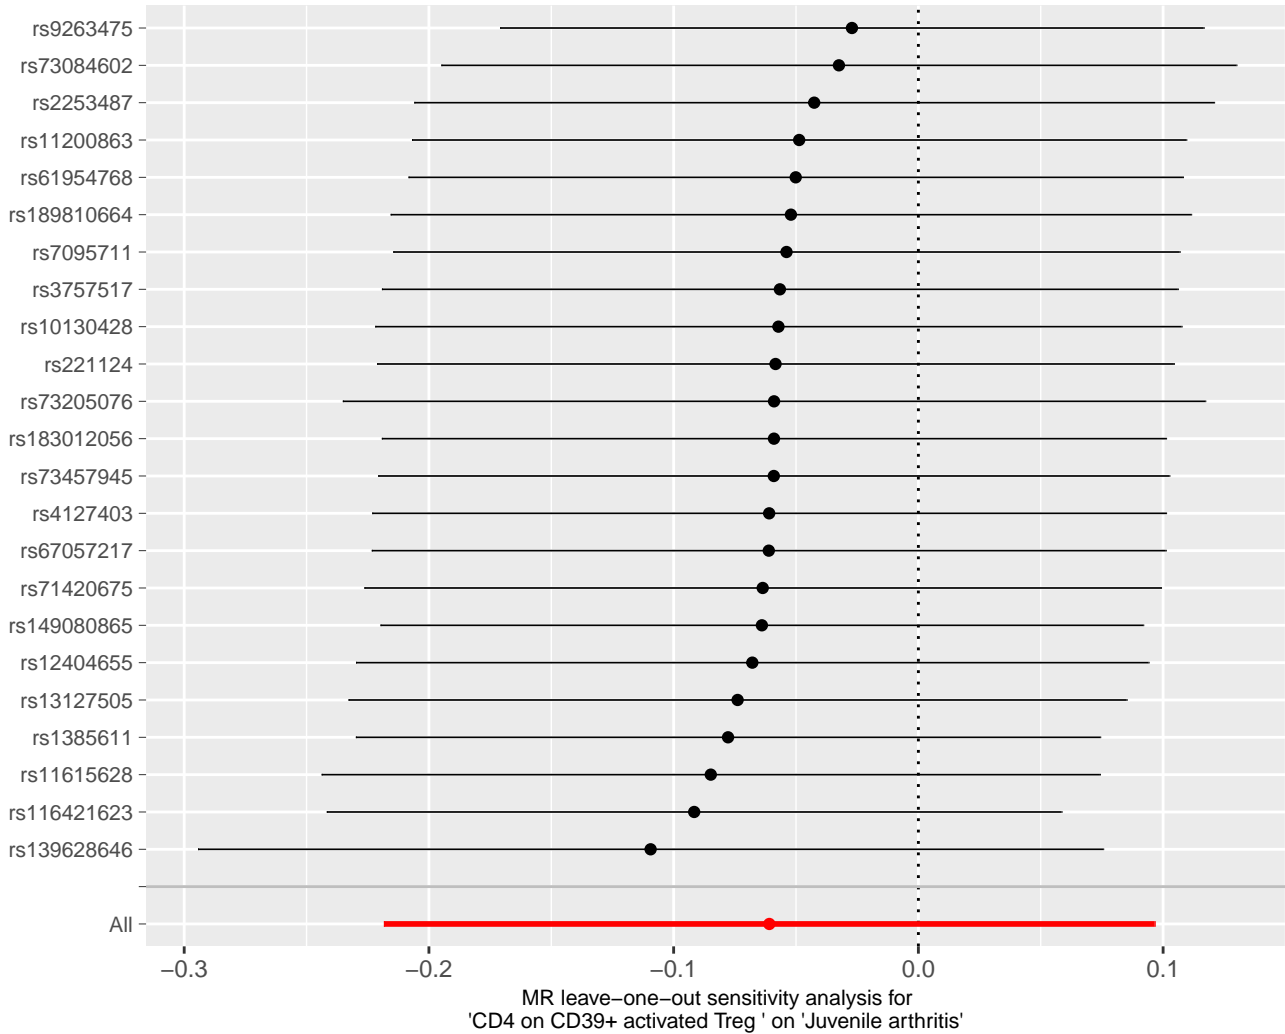

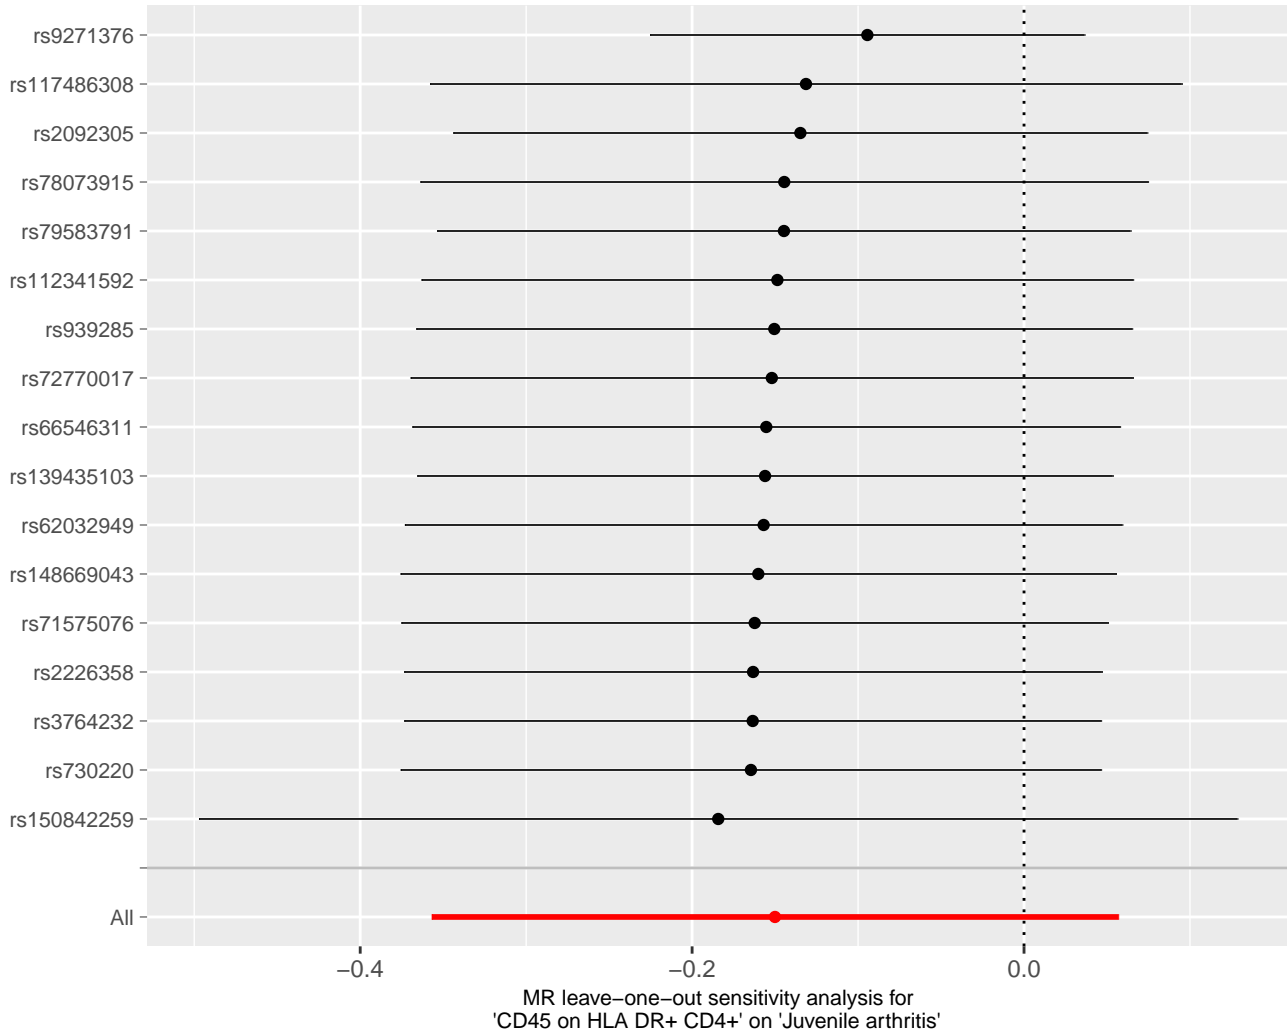

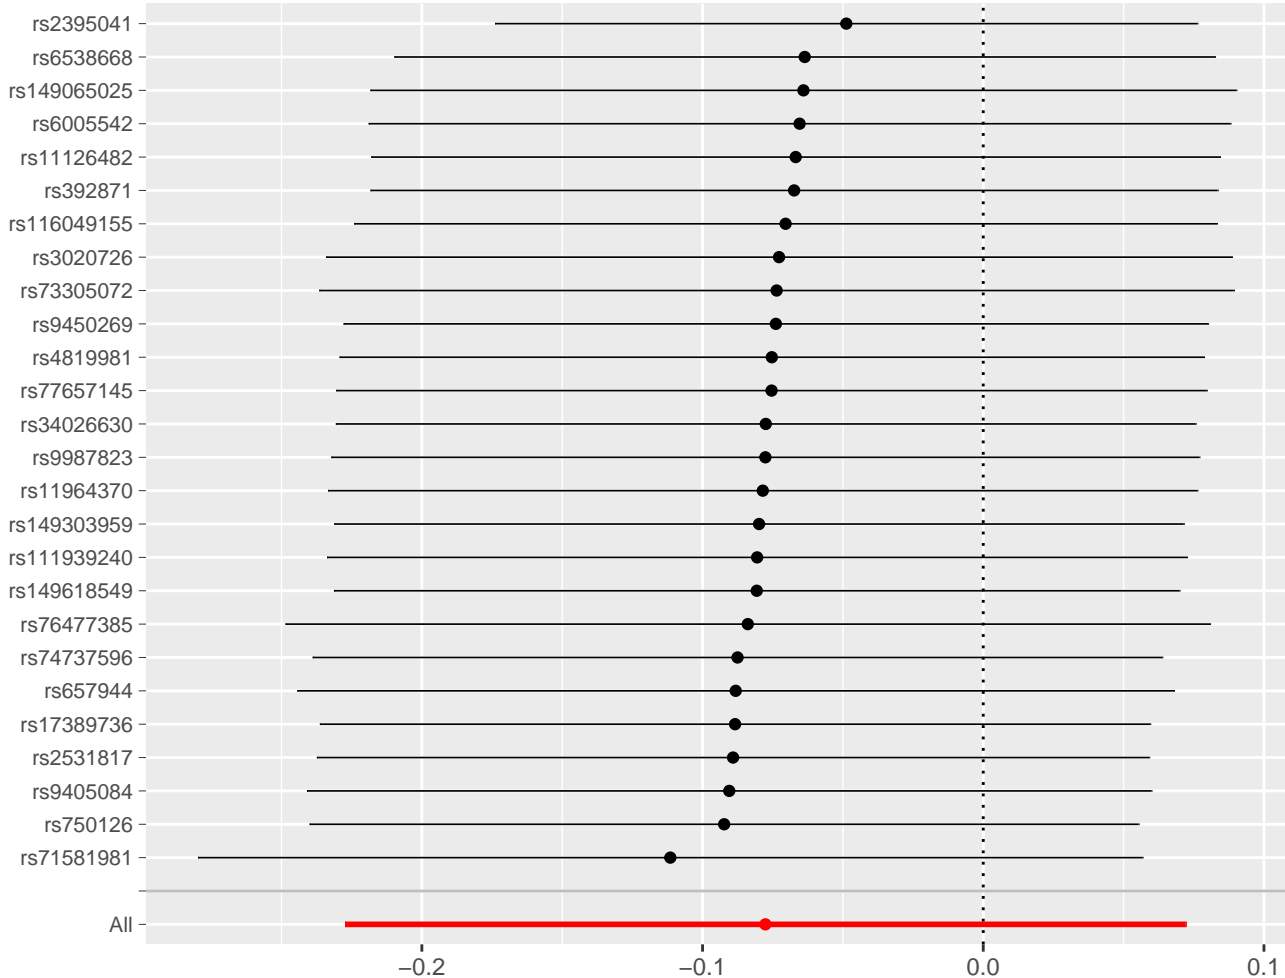

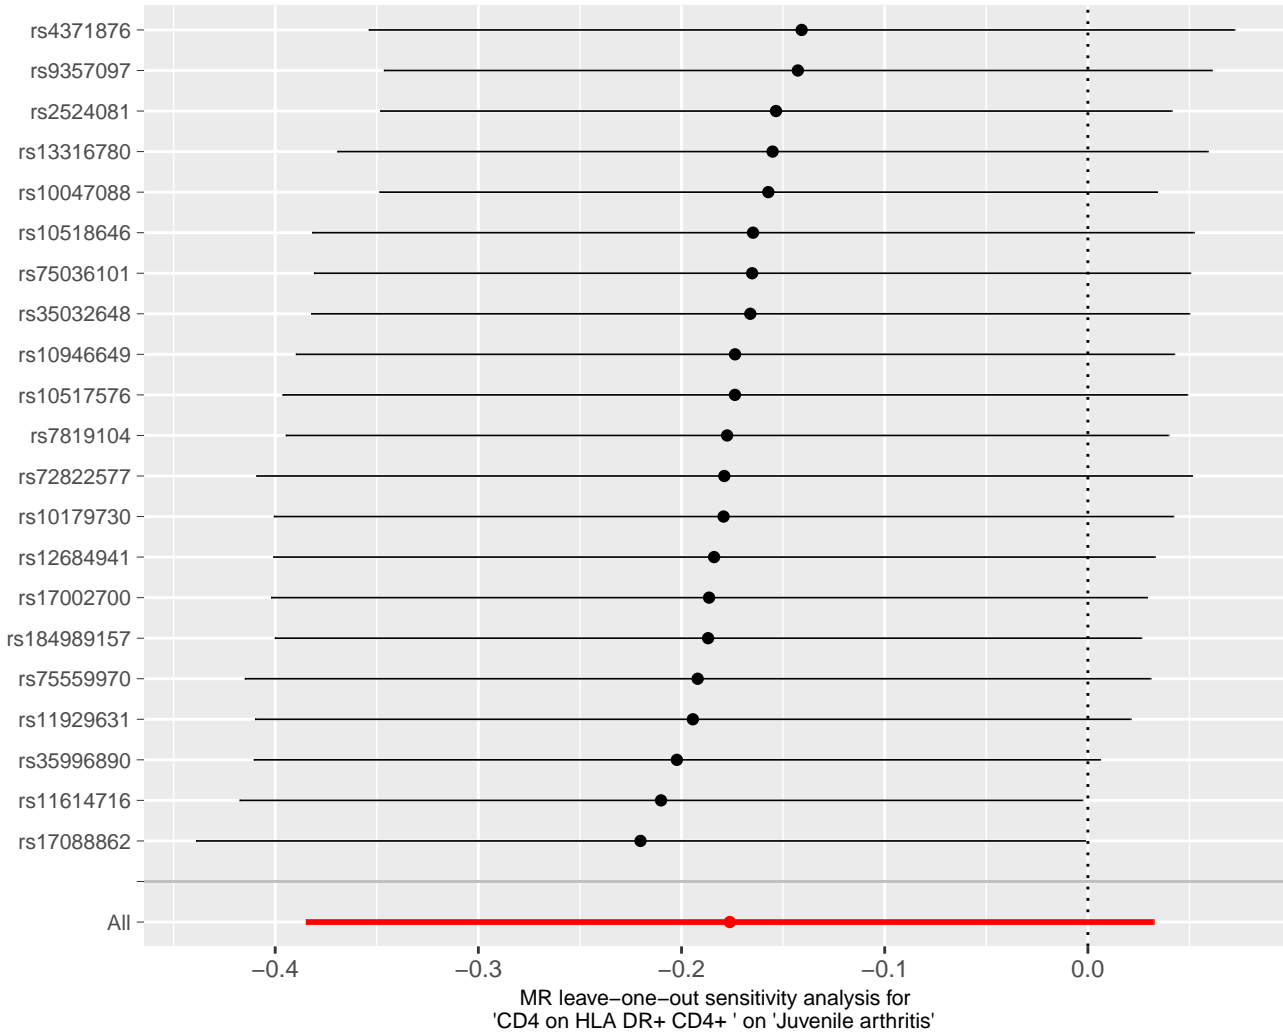

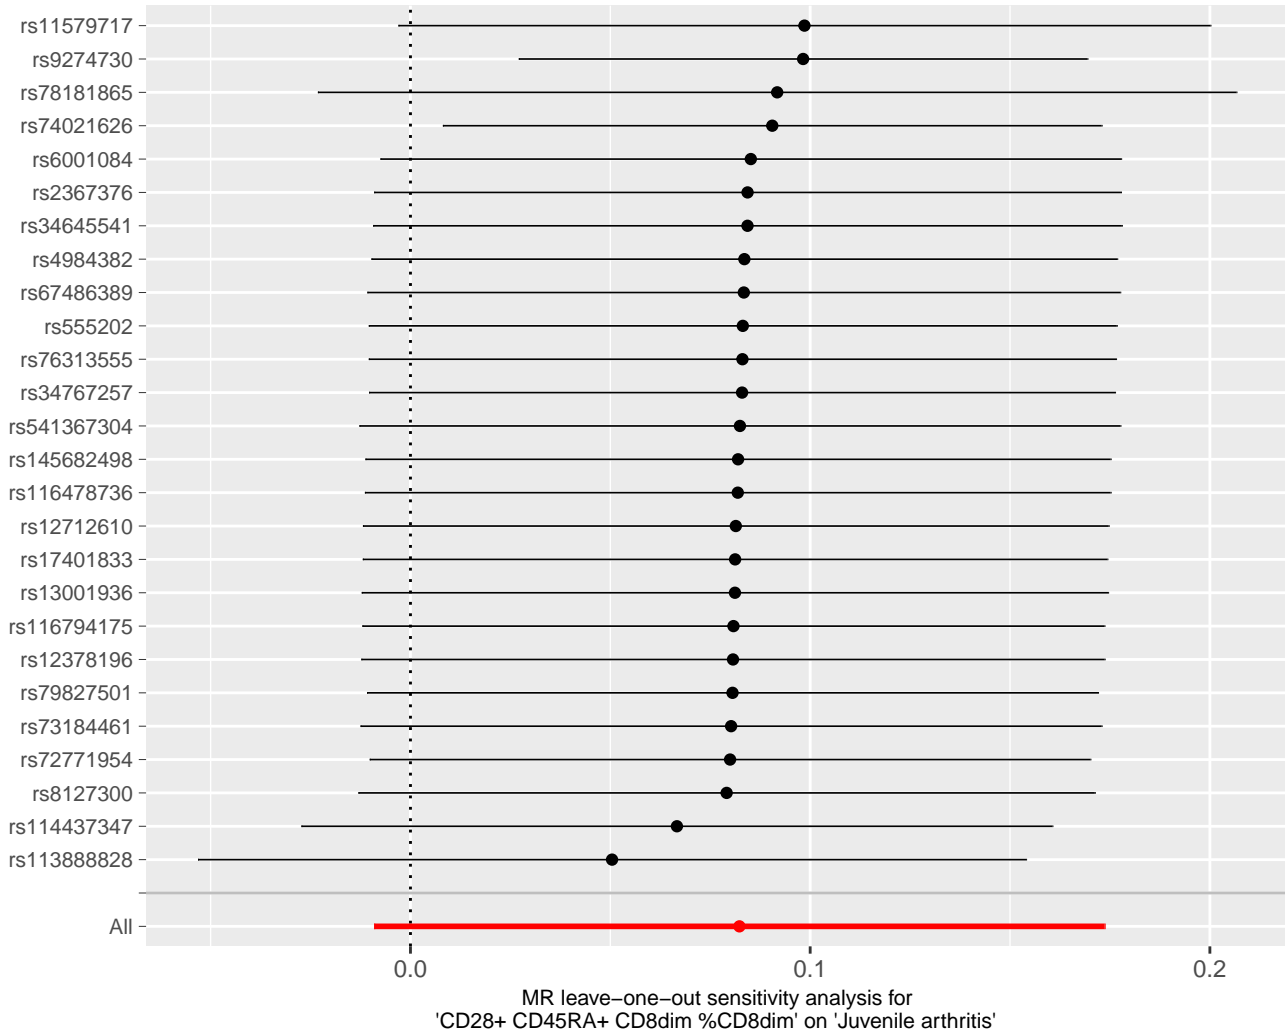

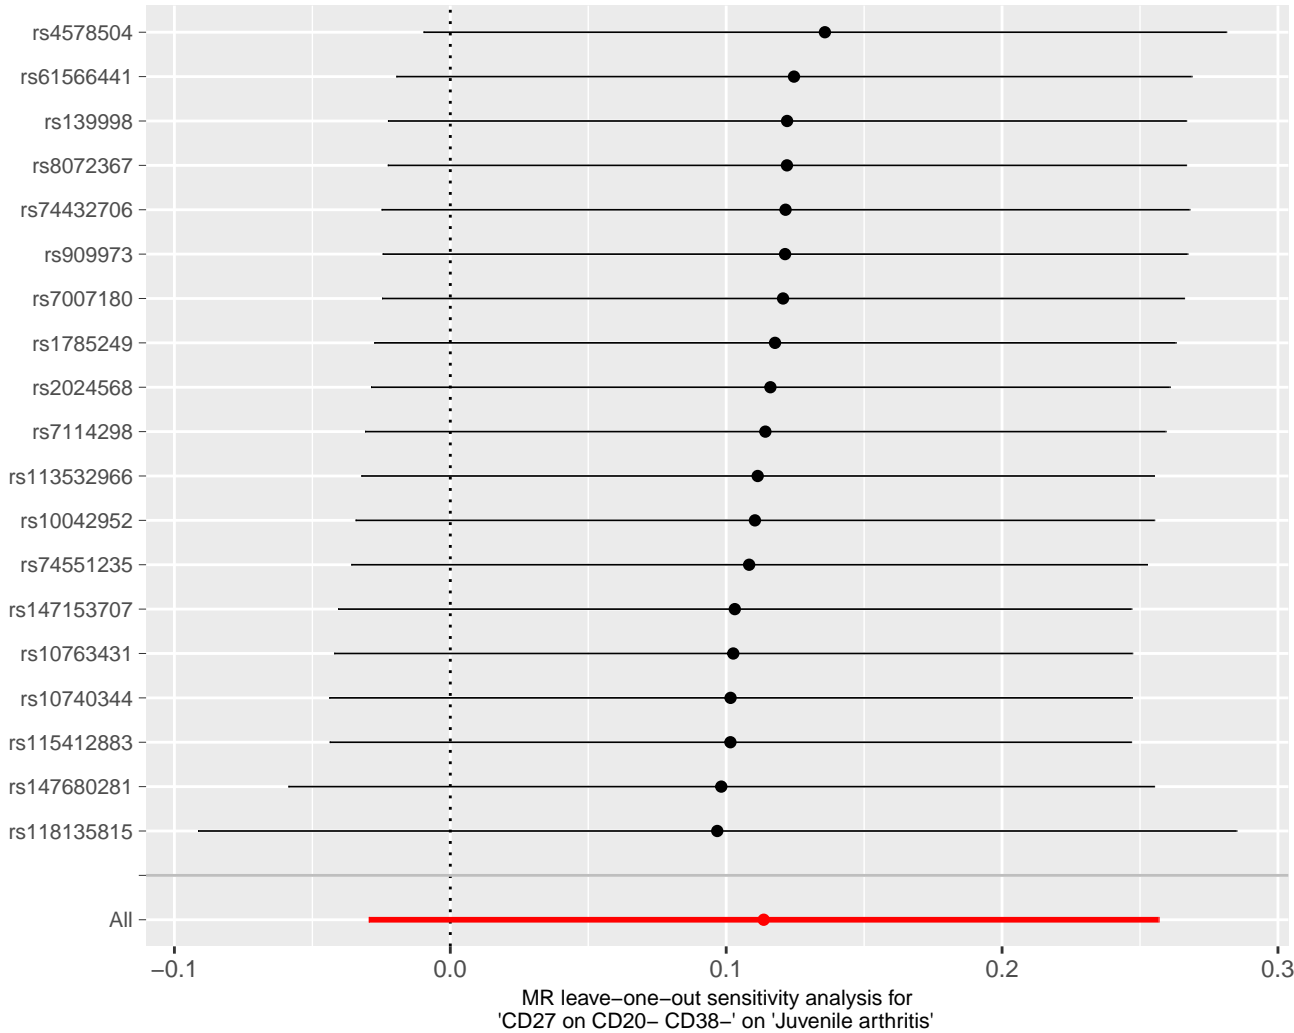



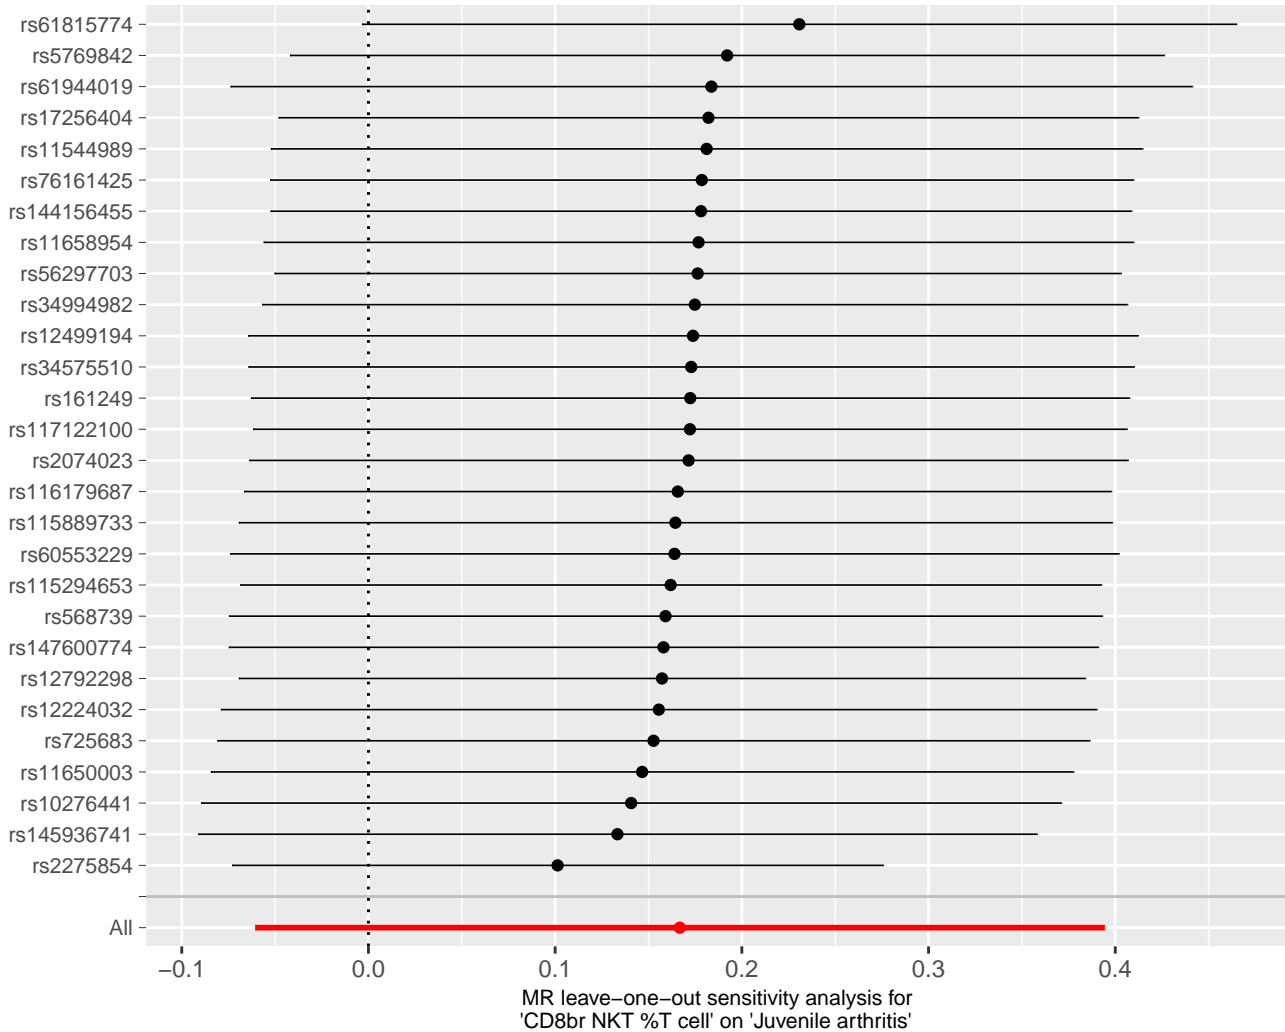

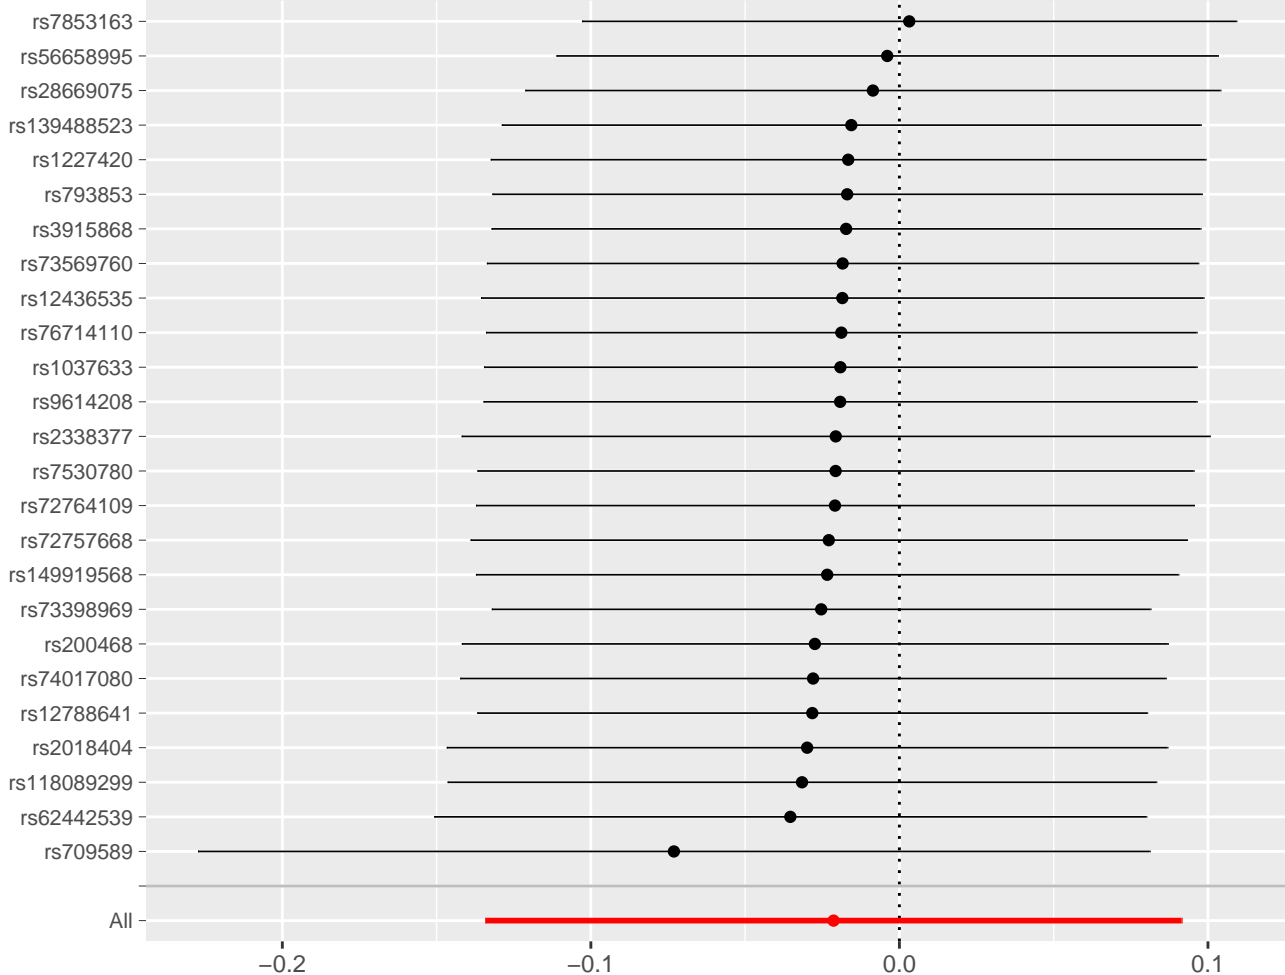

MR leave-one-out sensitivity analysis for 'IgD on IgD+ CD38br' on 'Juvenile arthritis'

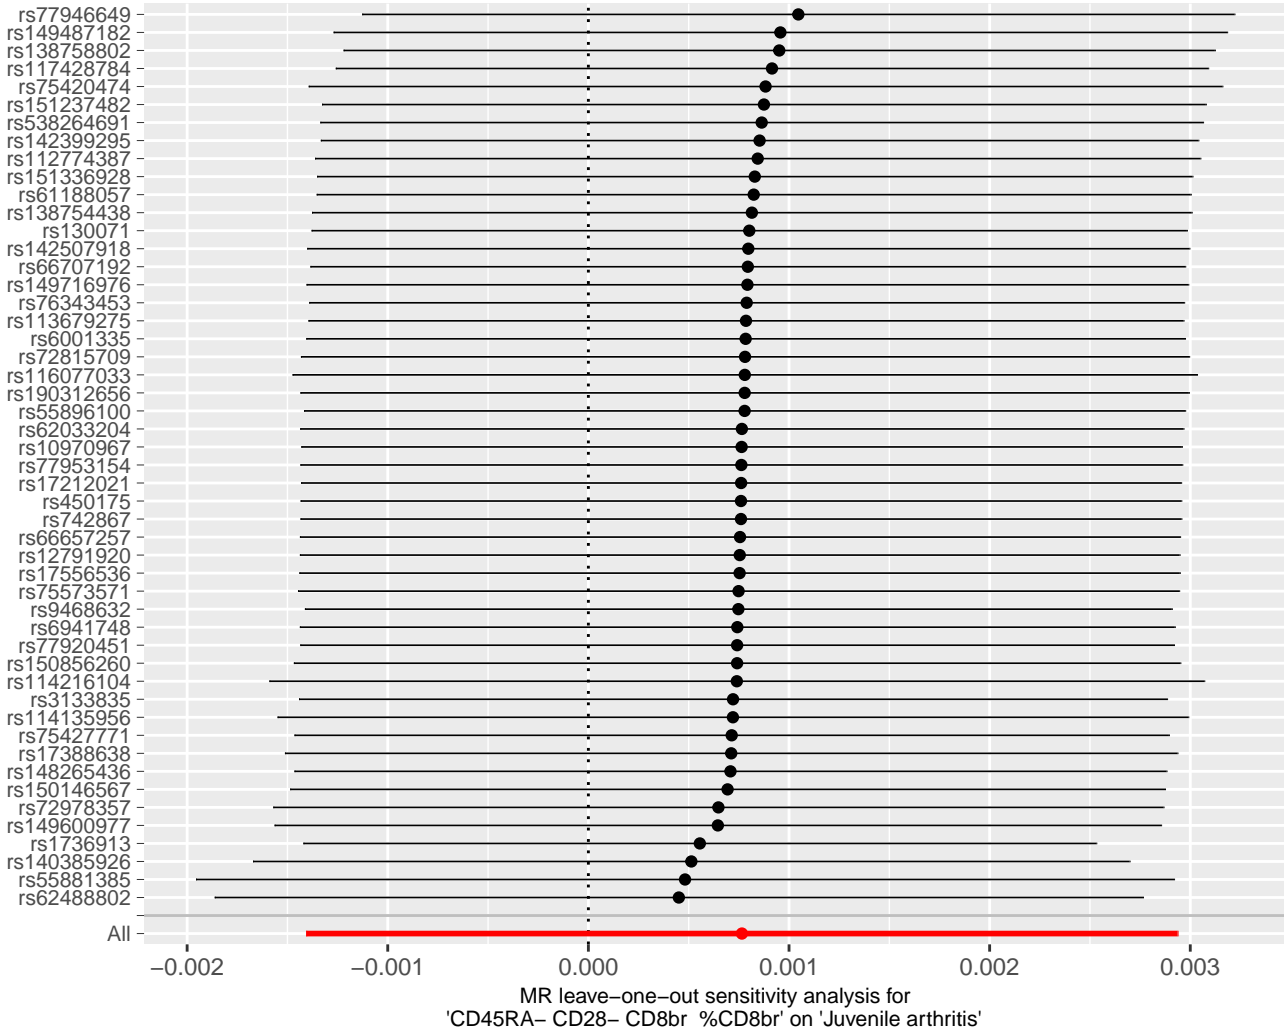

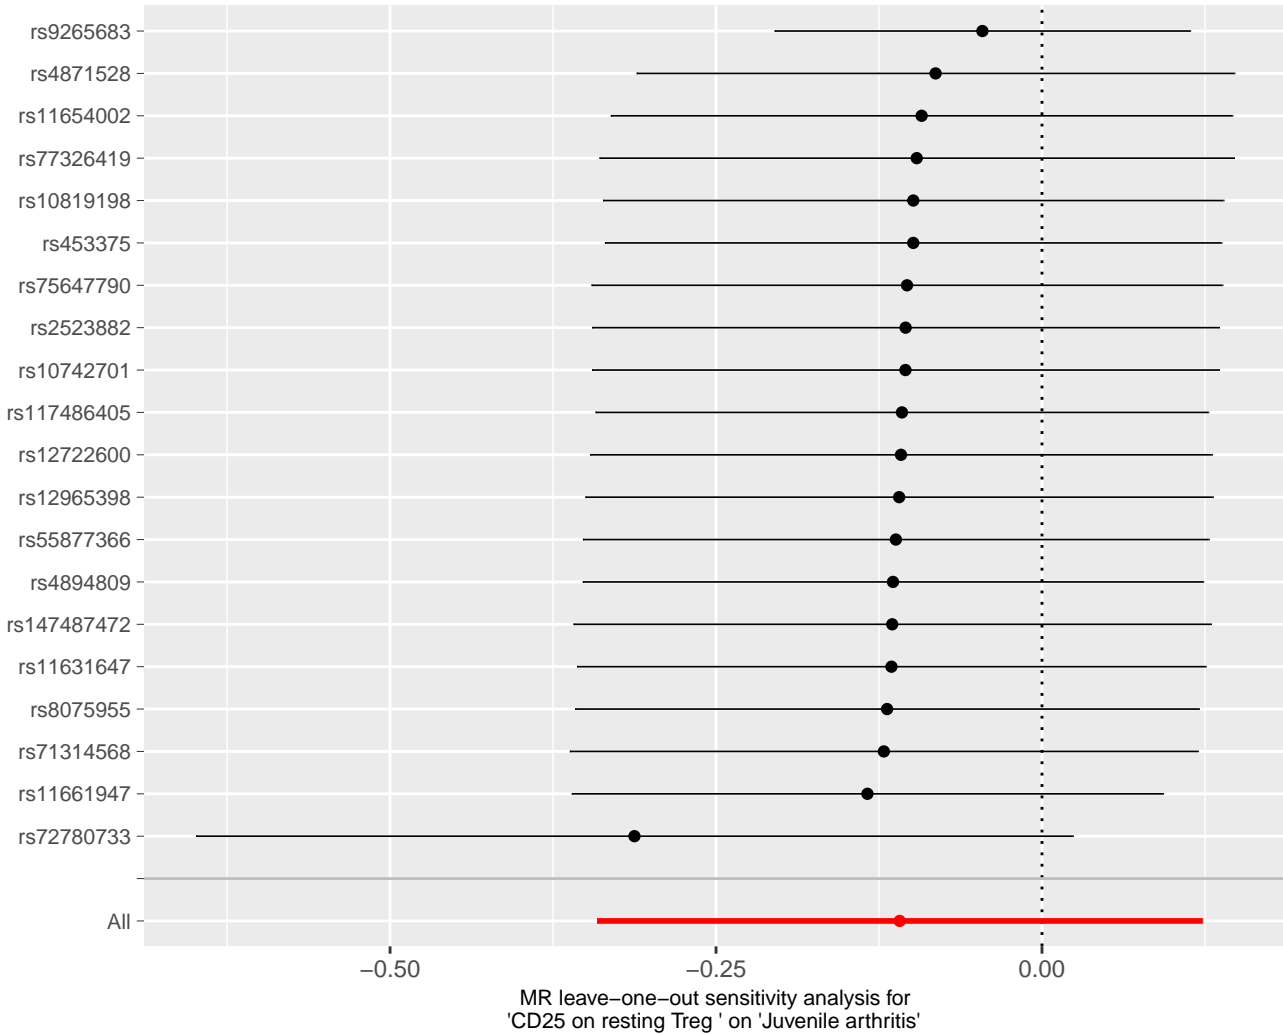

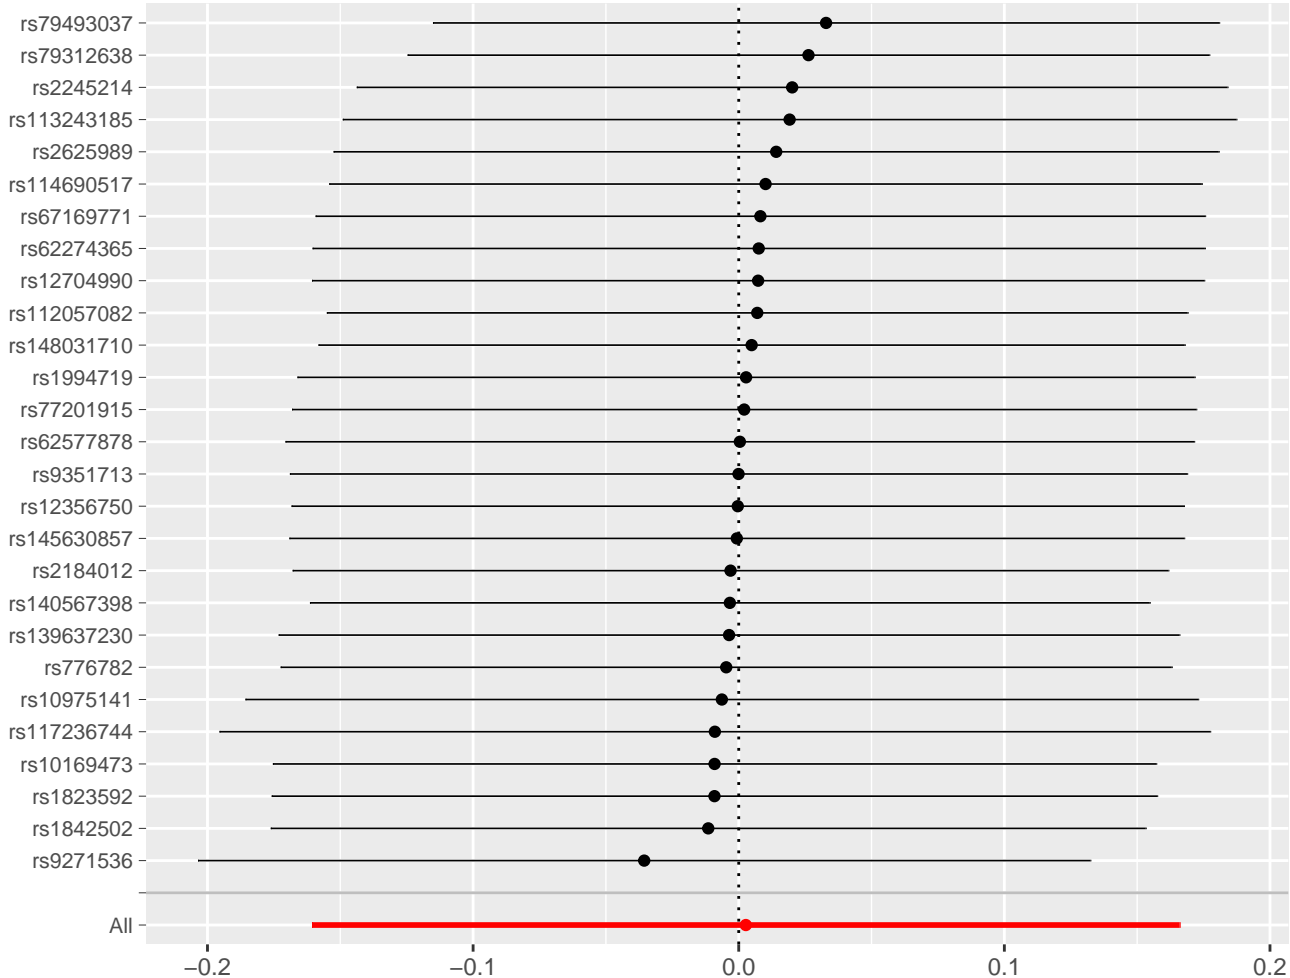

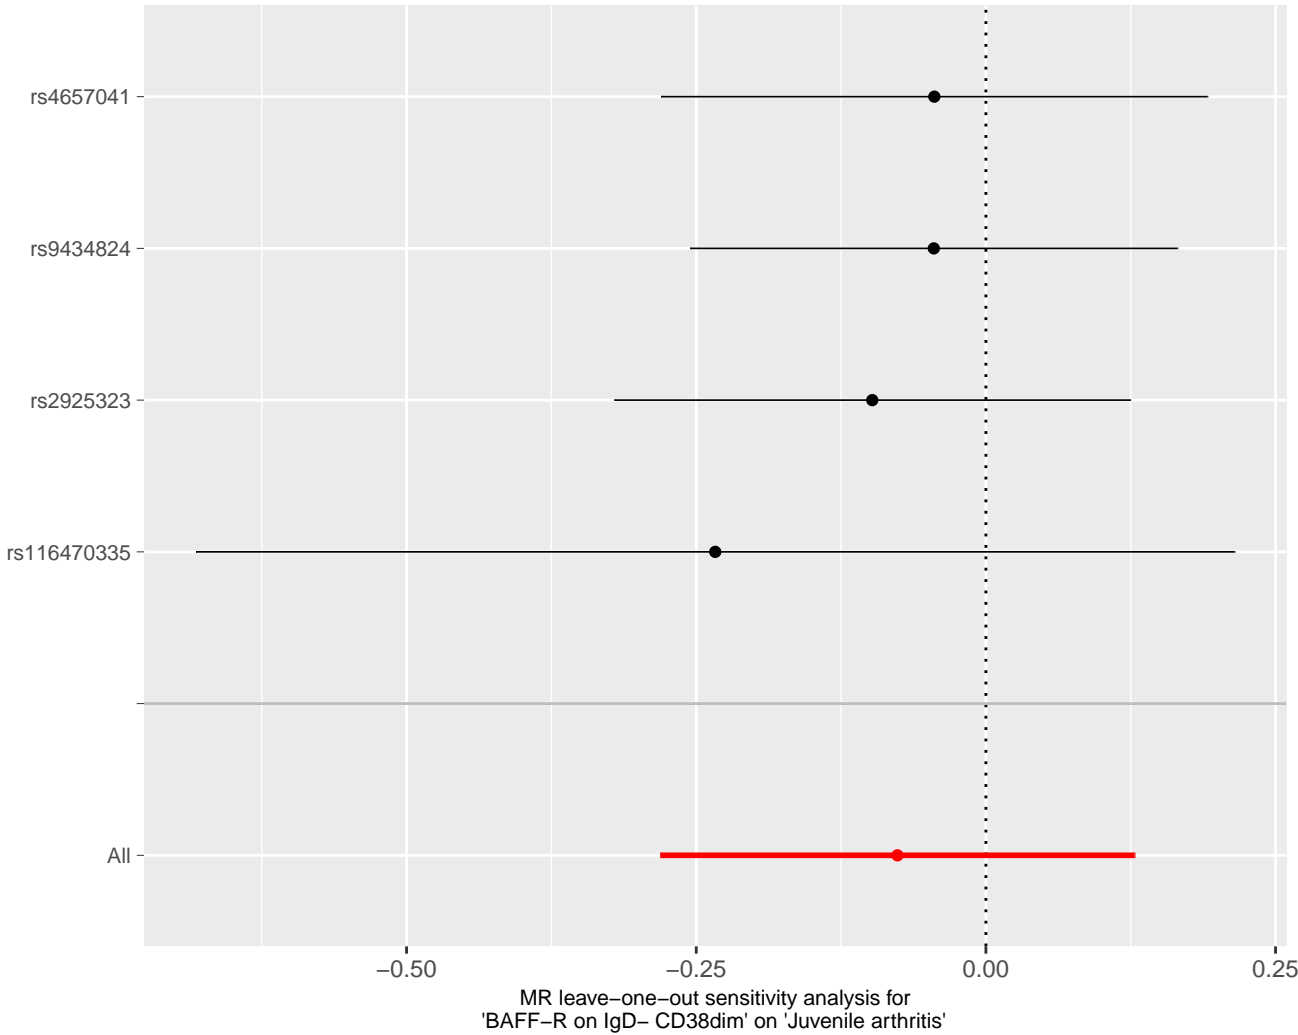

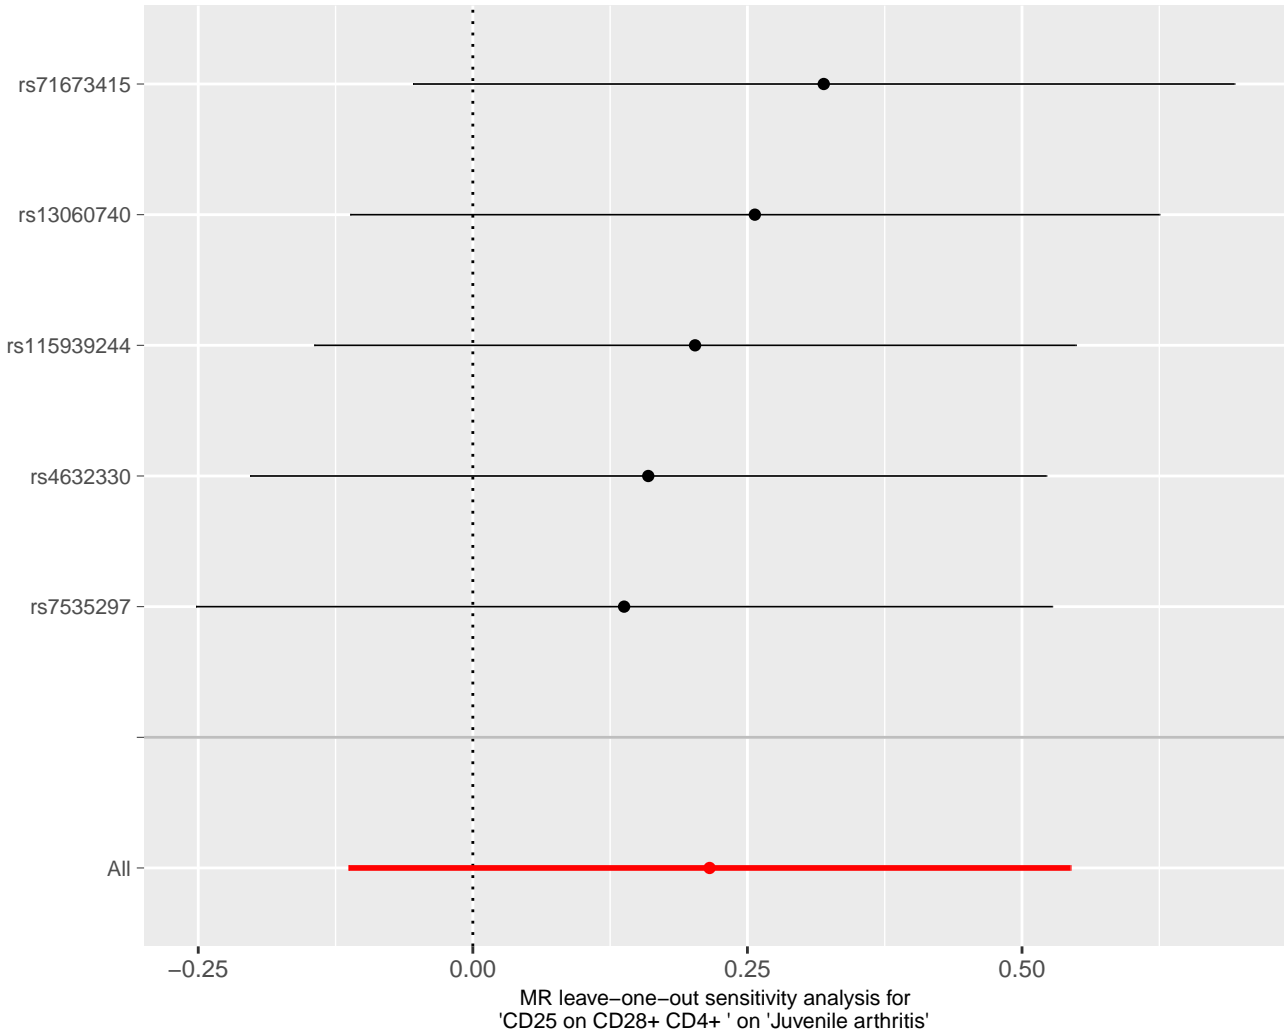

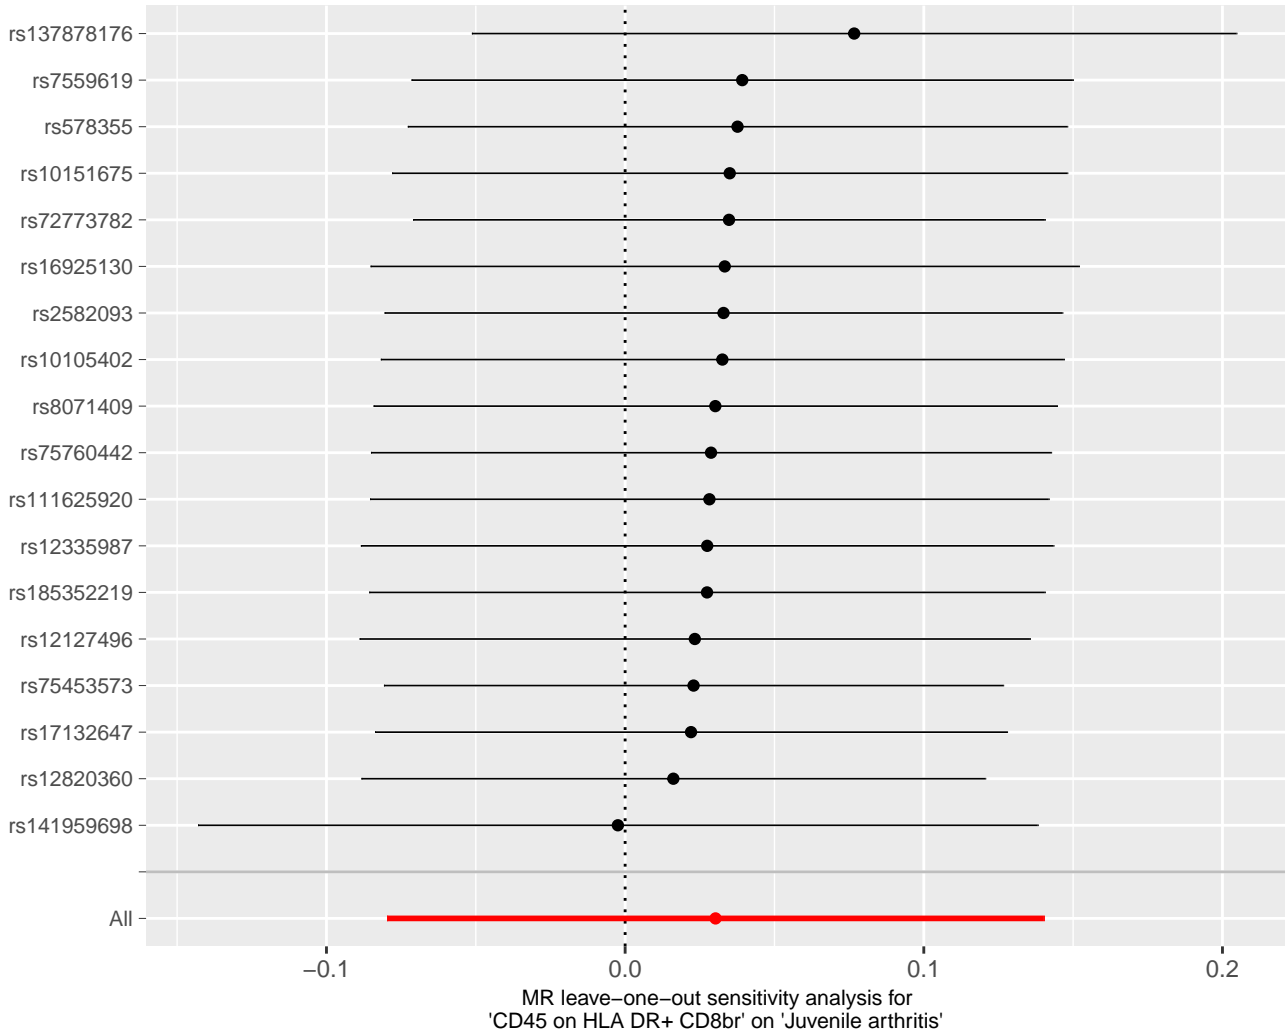



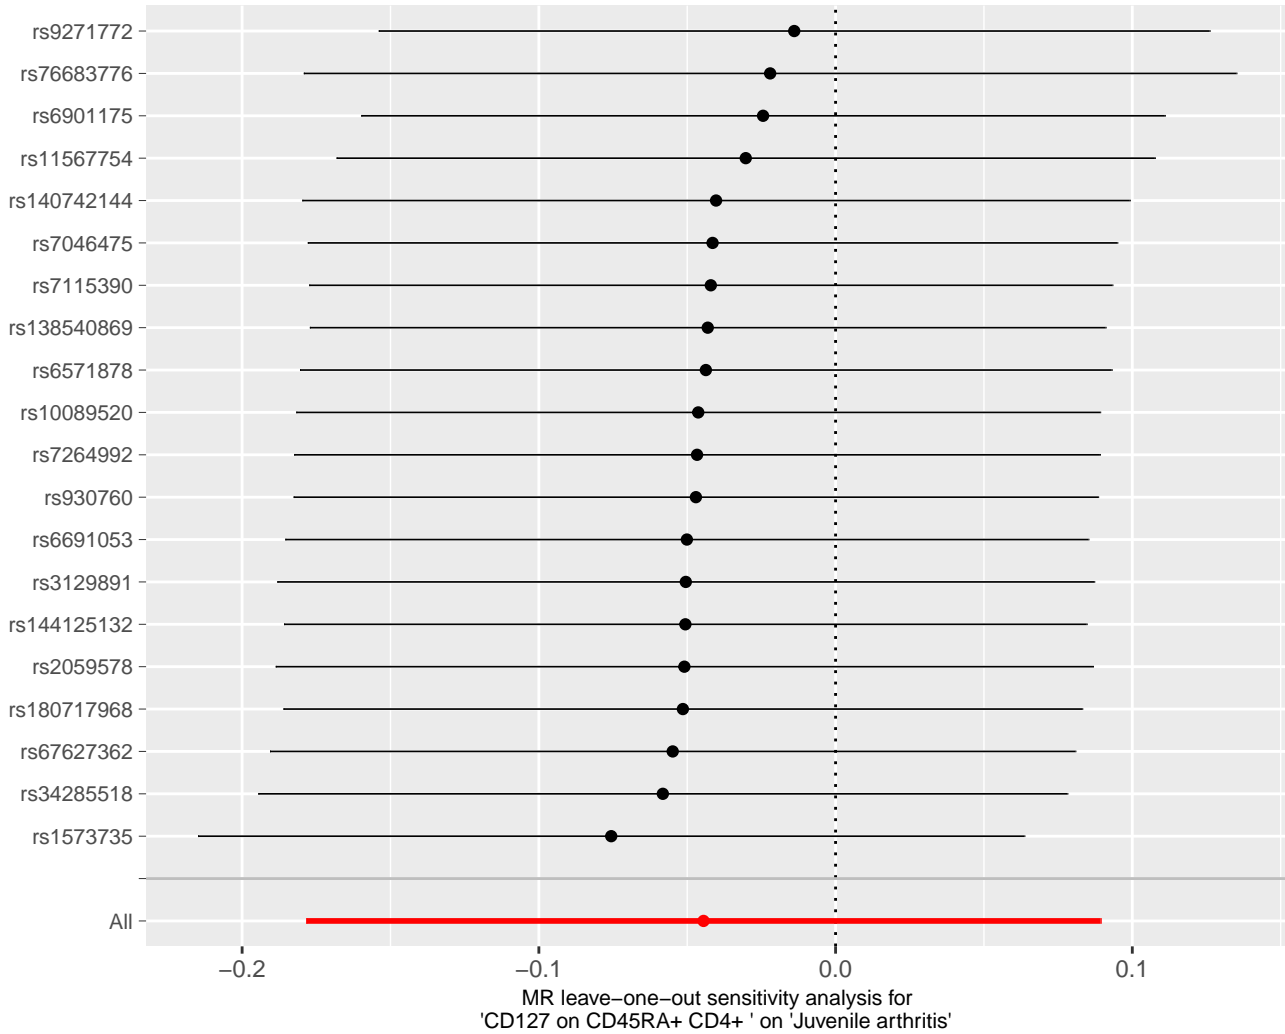

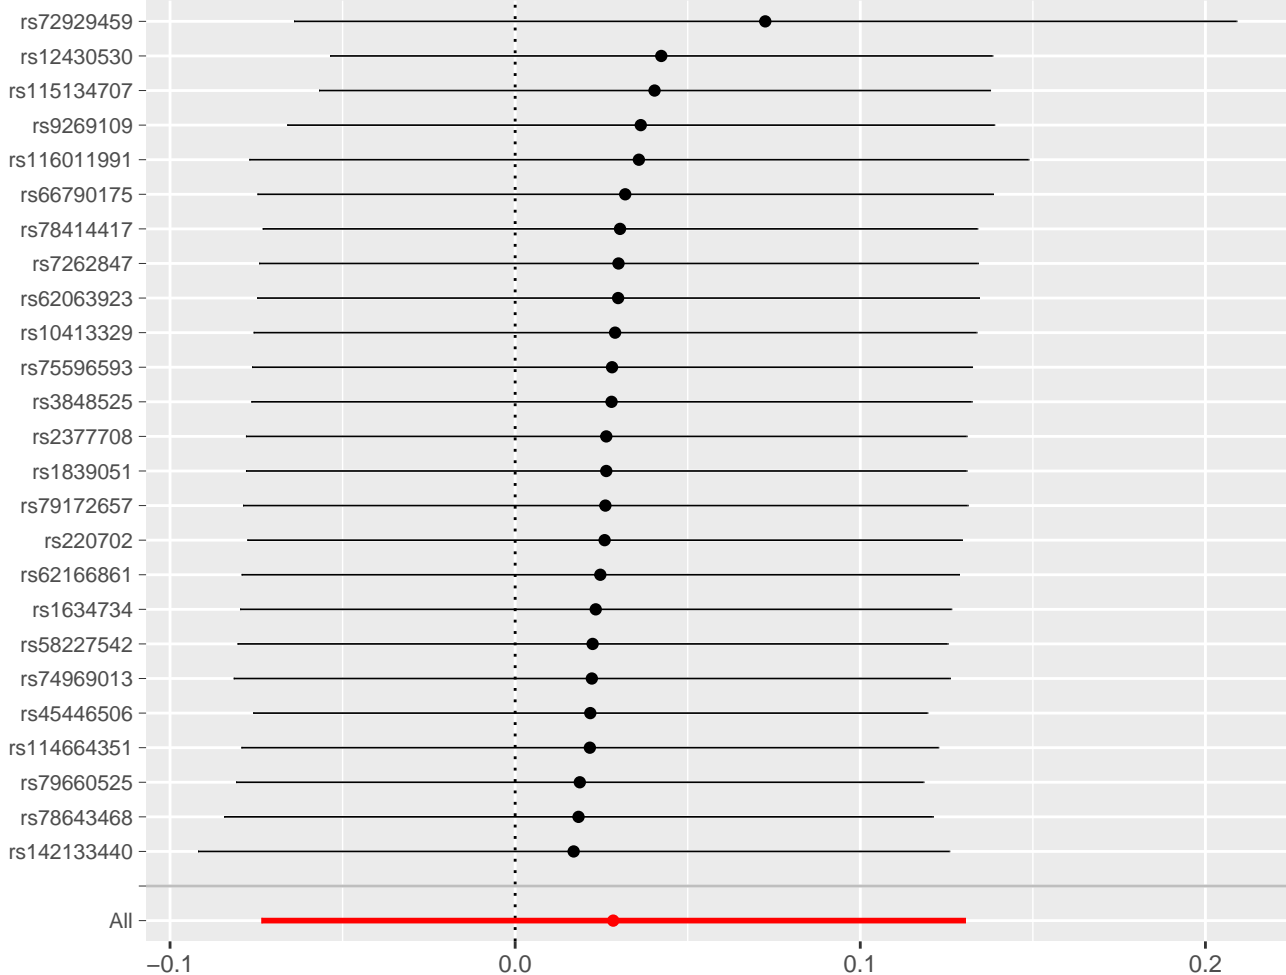

MR leave-one-out sensitivity analysis for 'CD28- CD25++ CD8br AC' on 'Juvenile arthritis'

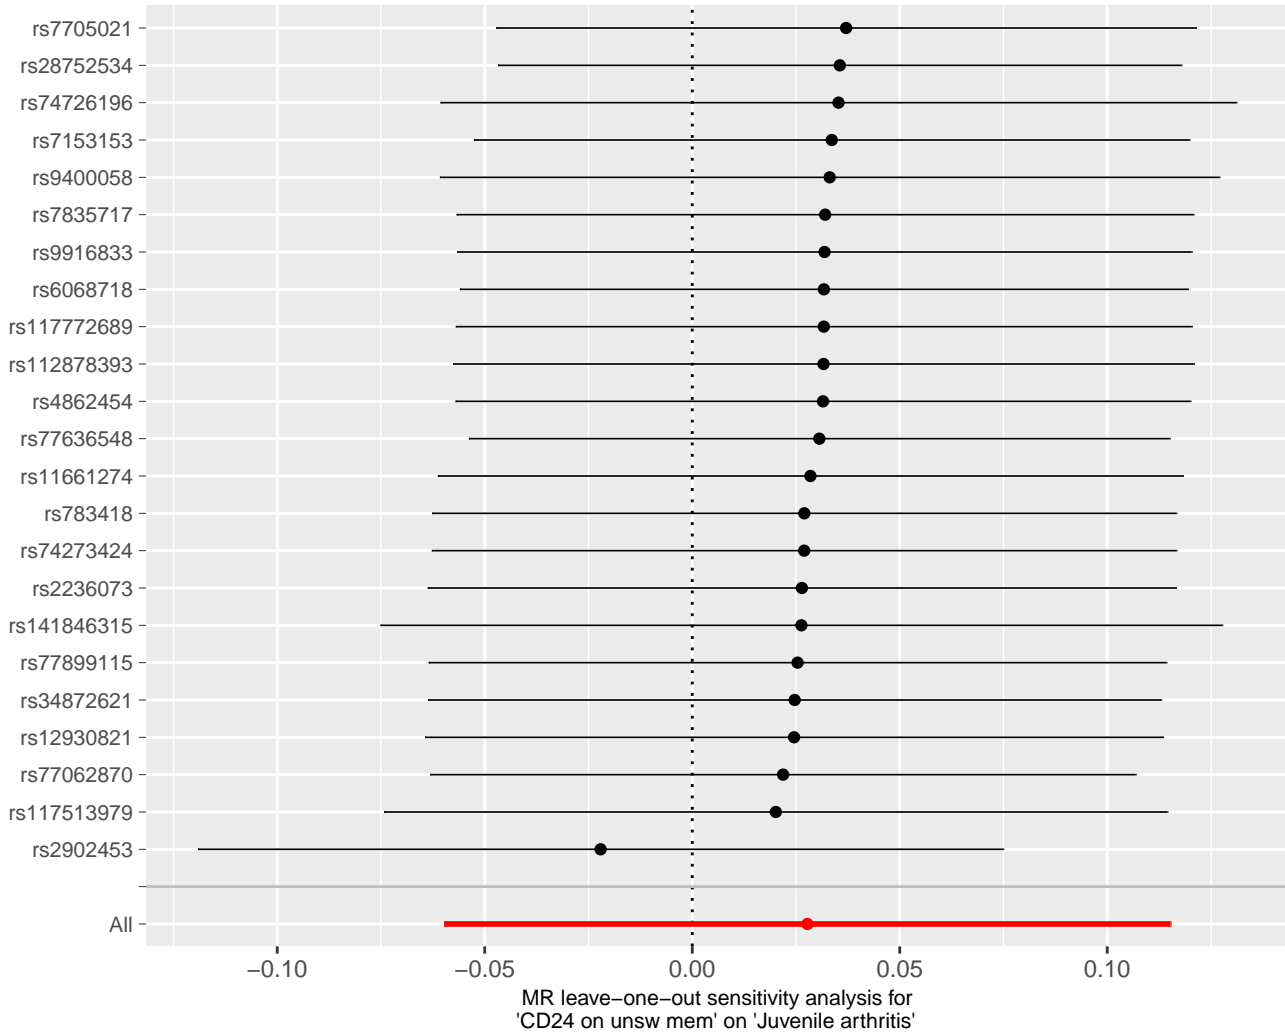

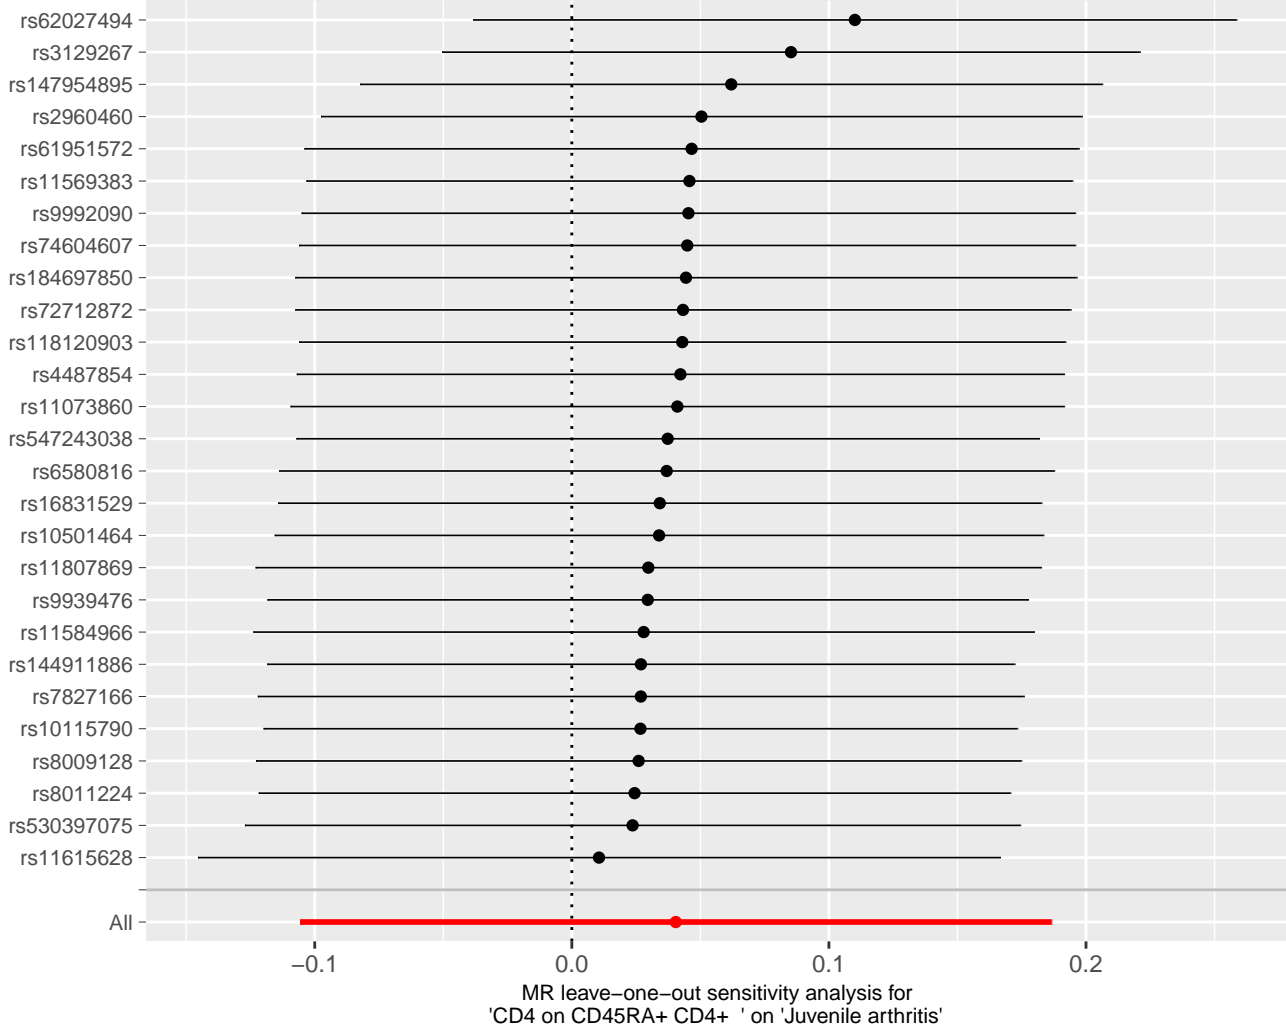

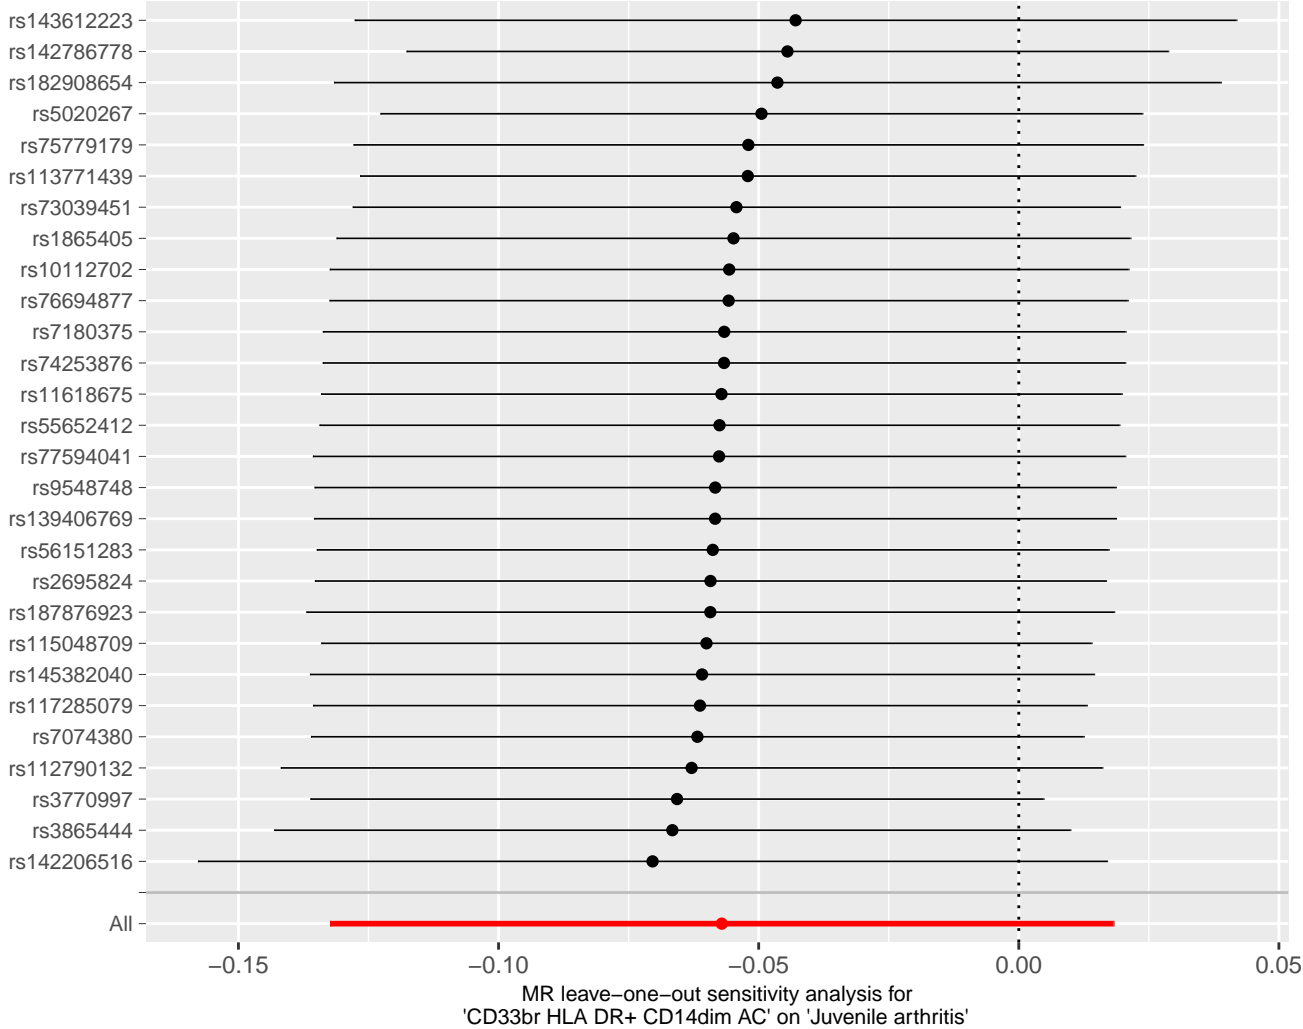

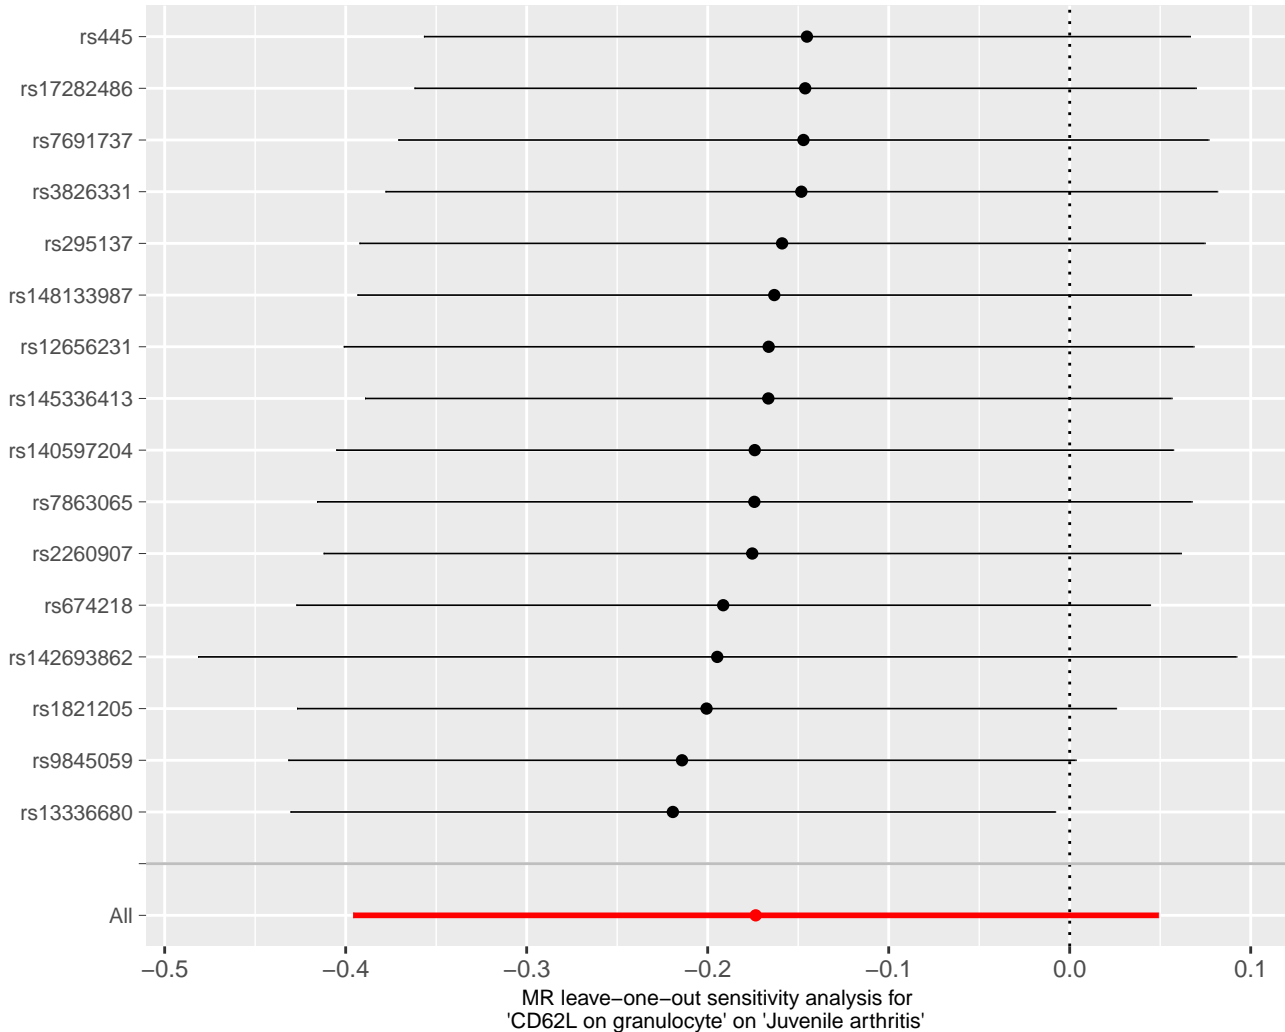

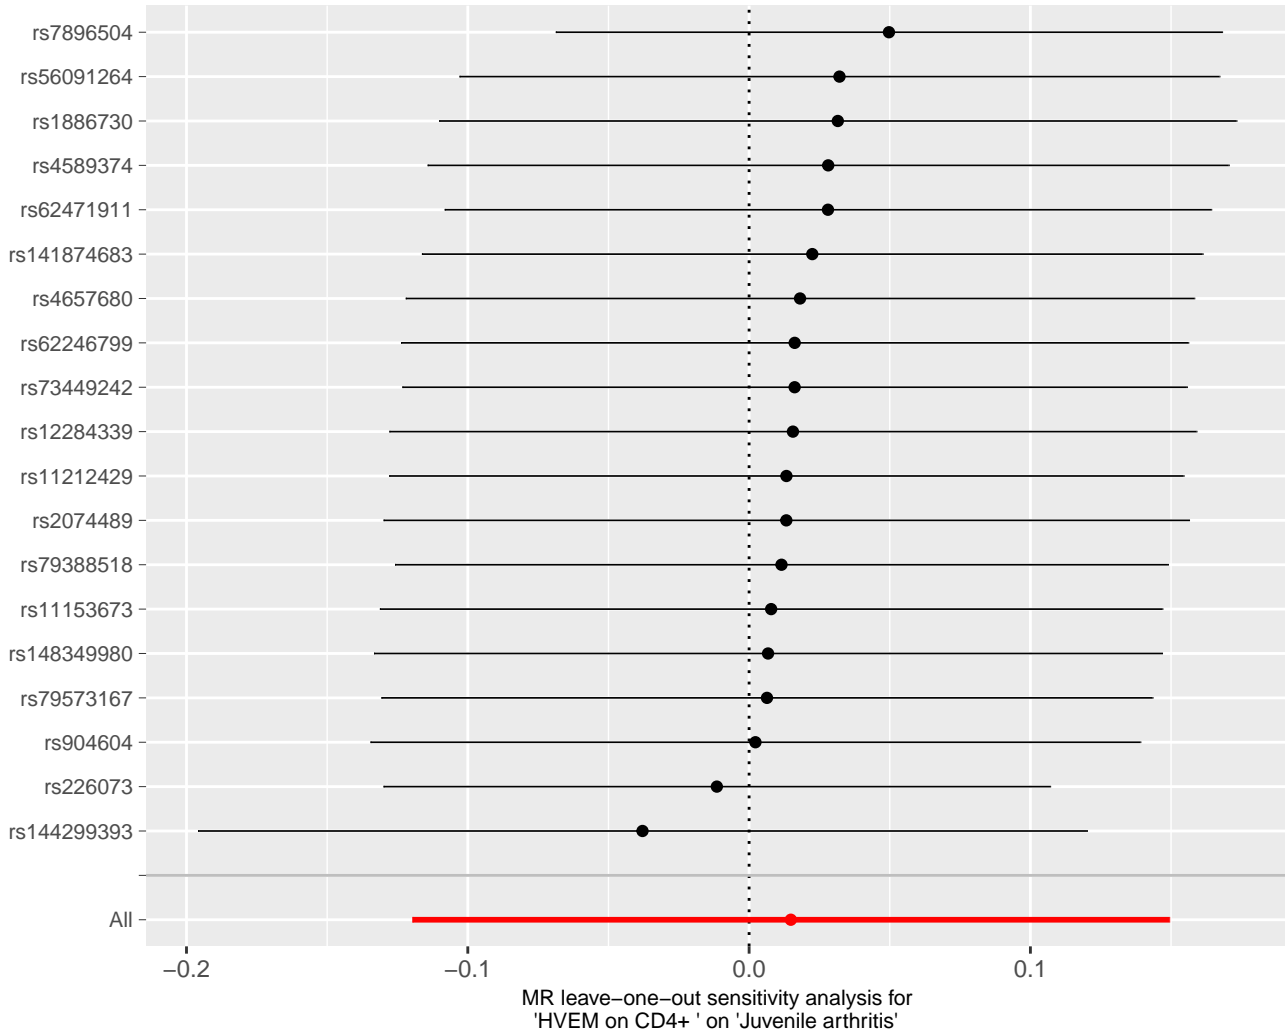

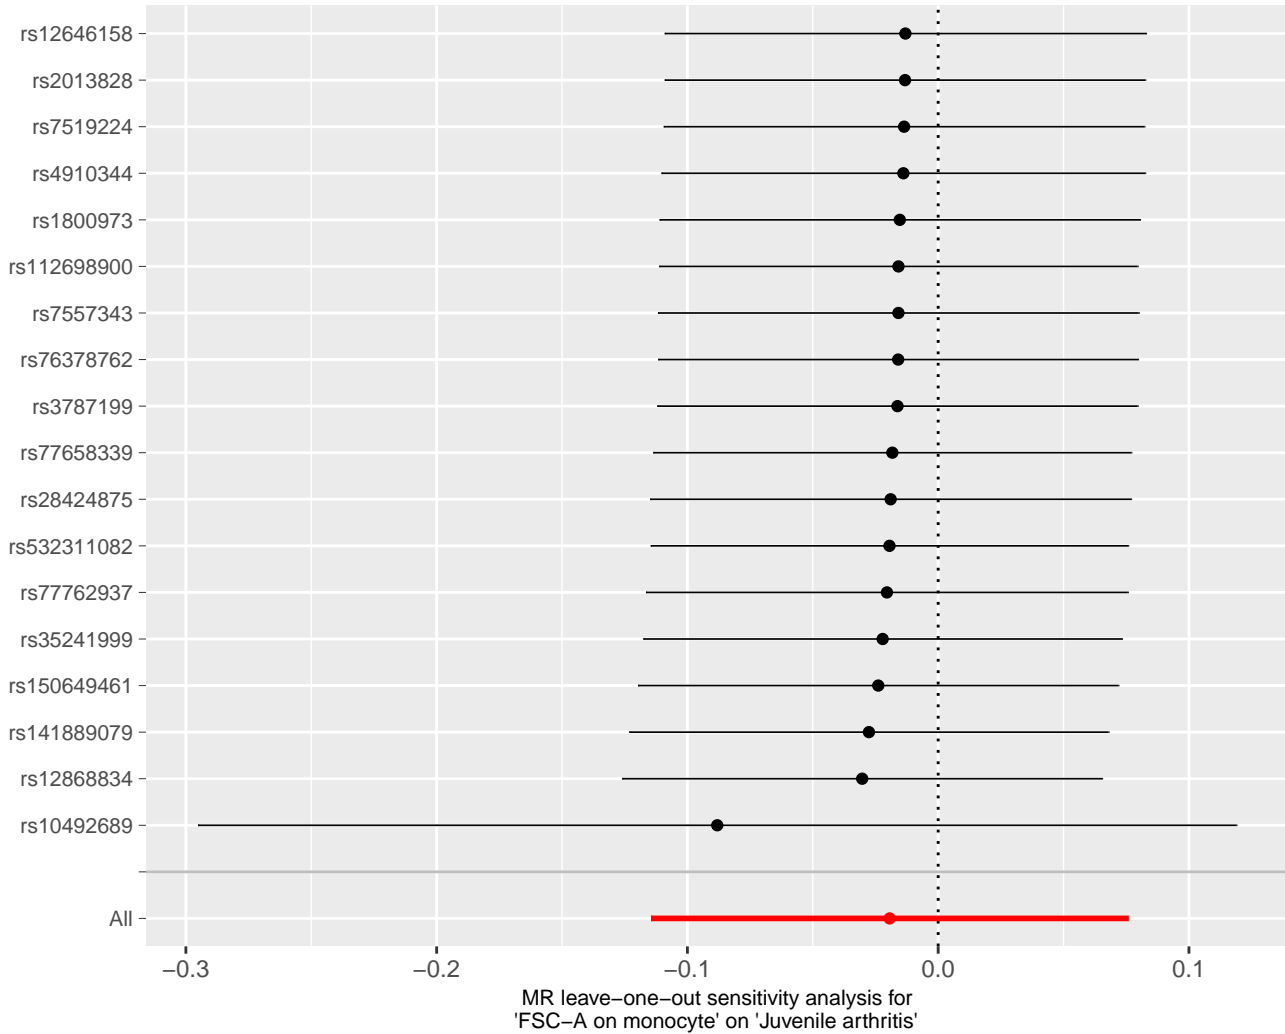



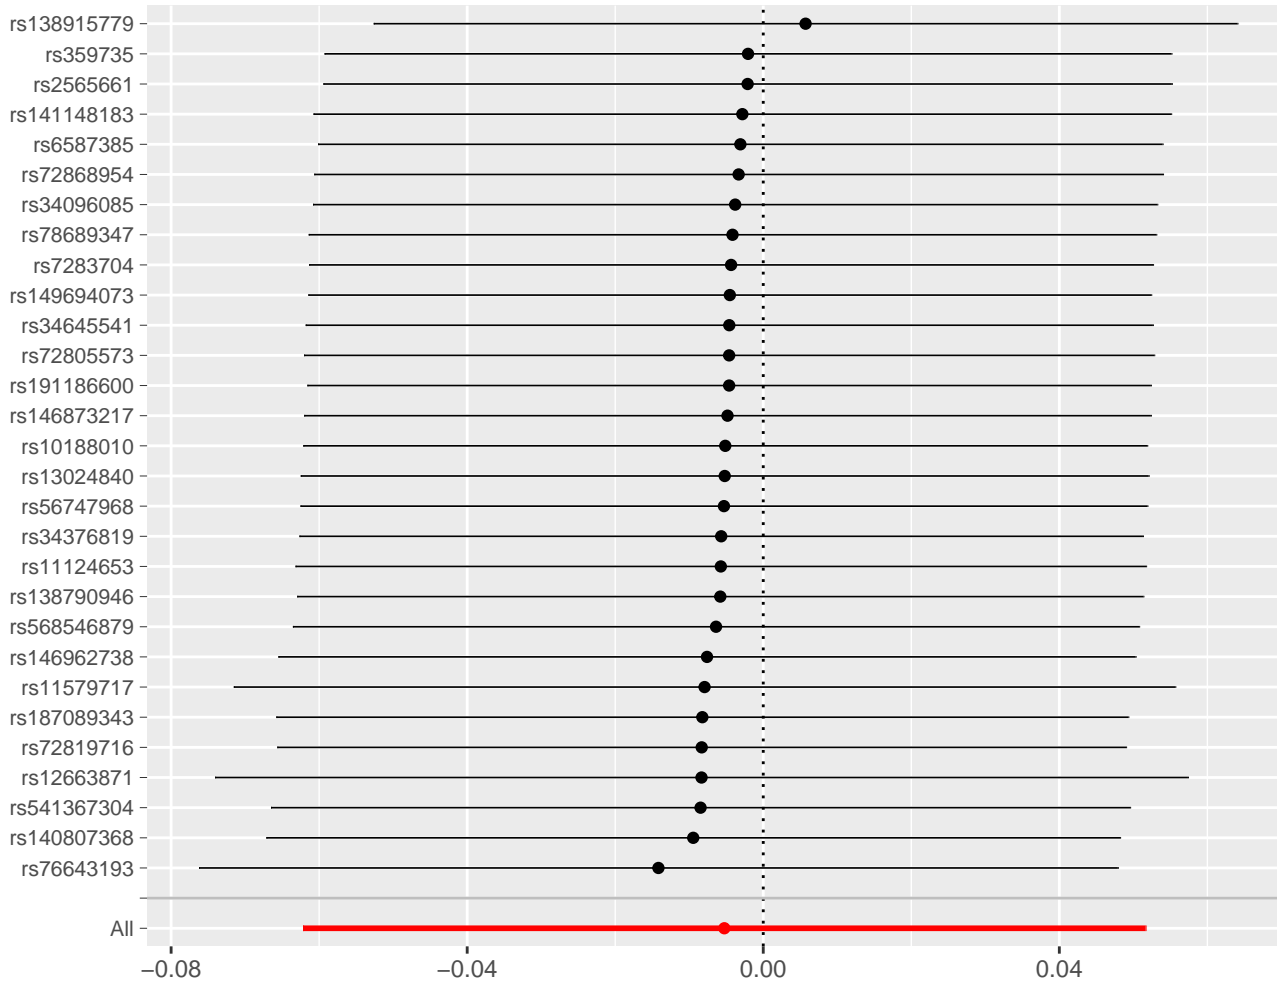

MR leave-one-out sensitivity analysis for 'CD45RA on resting Treg' on 'Juvenile arthritis'

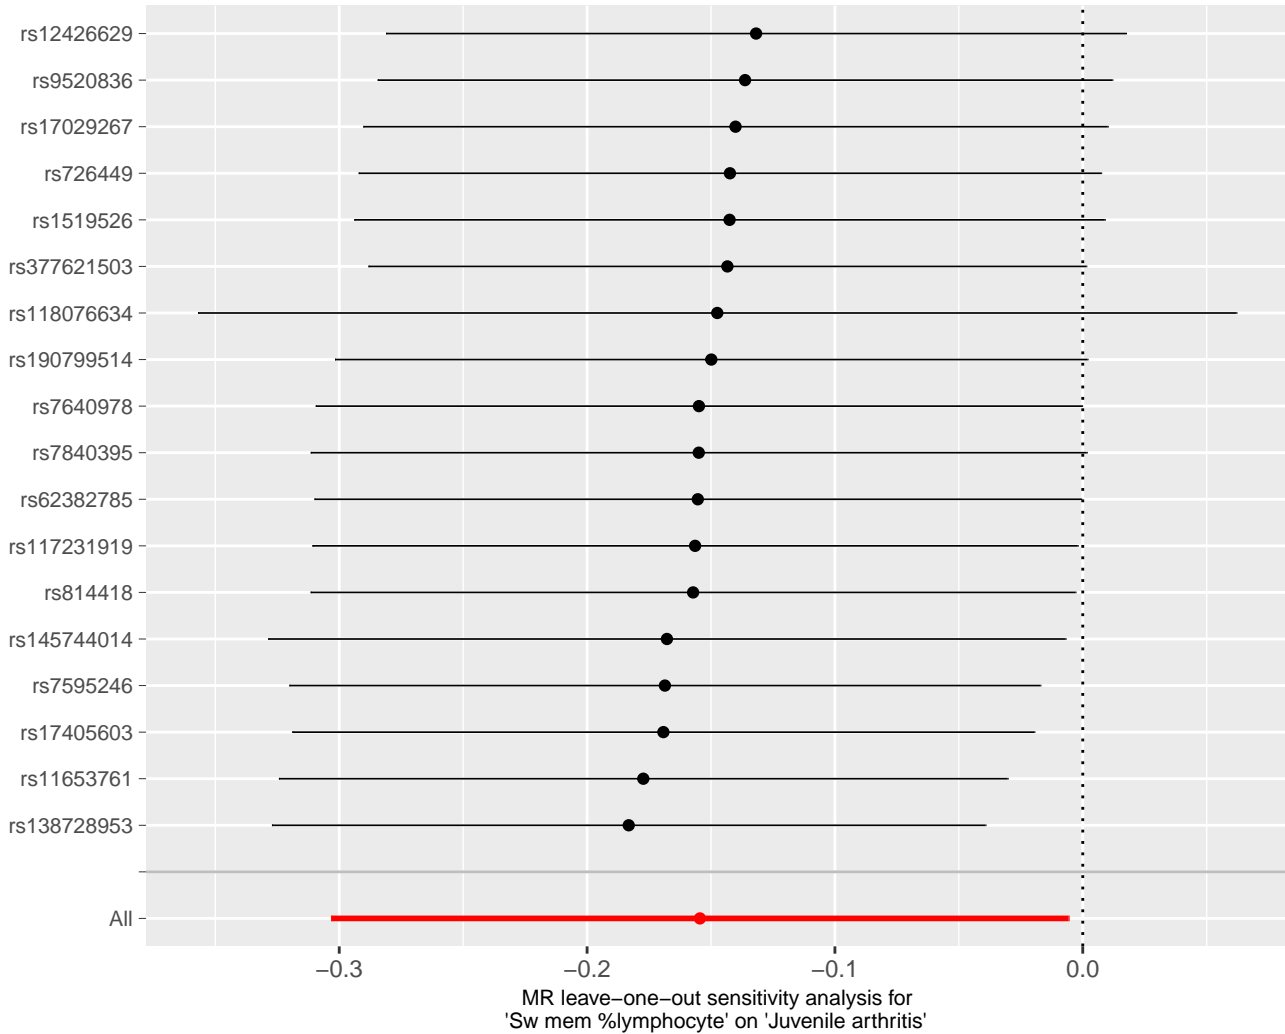

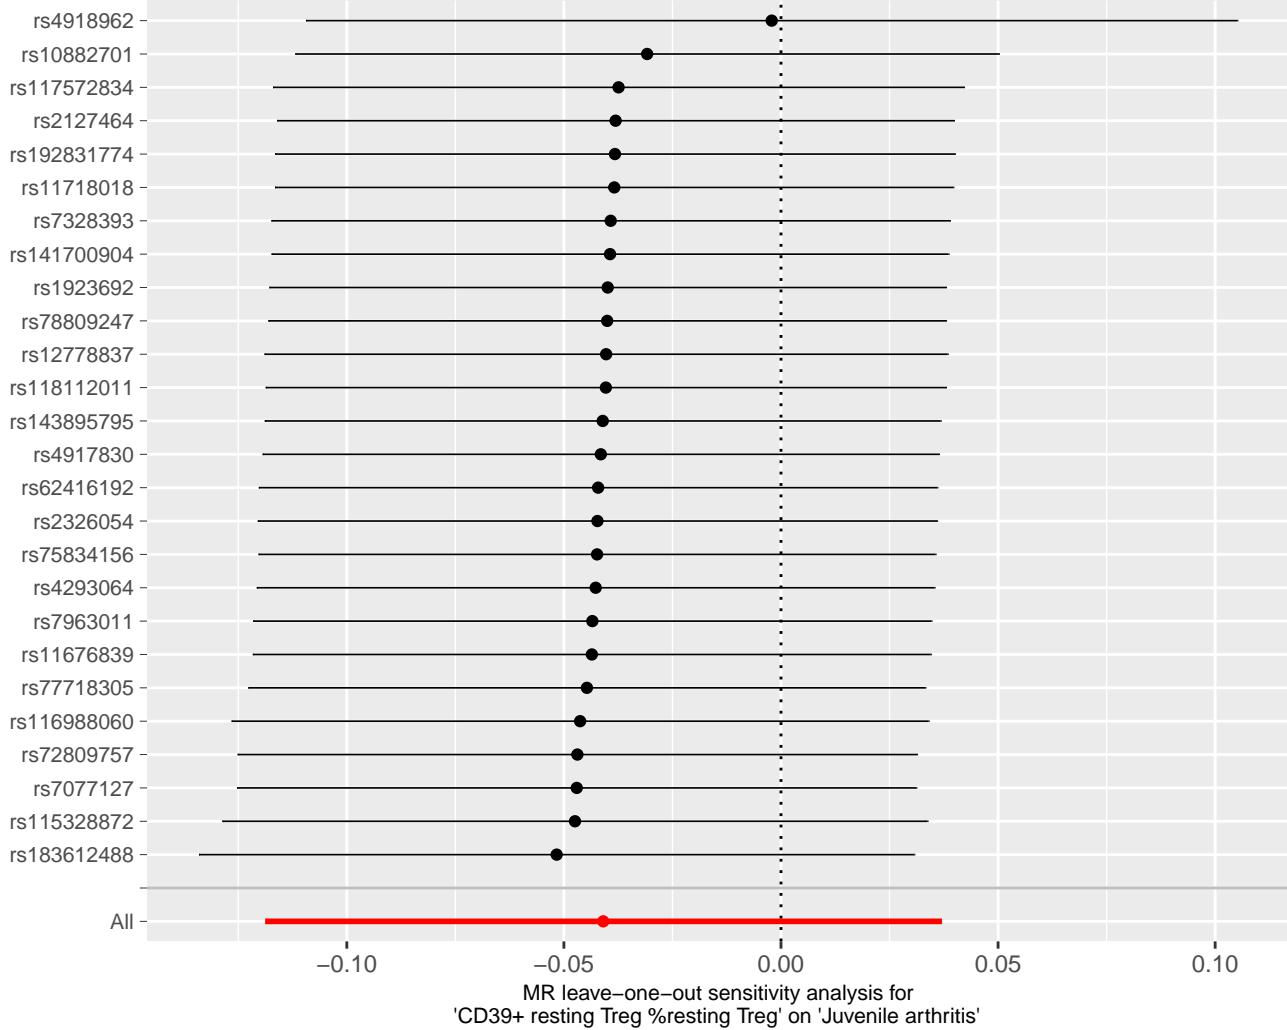

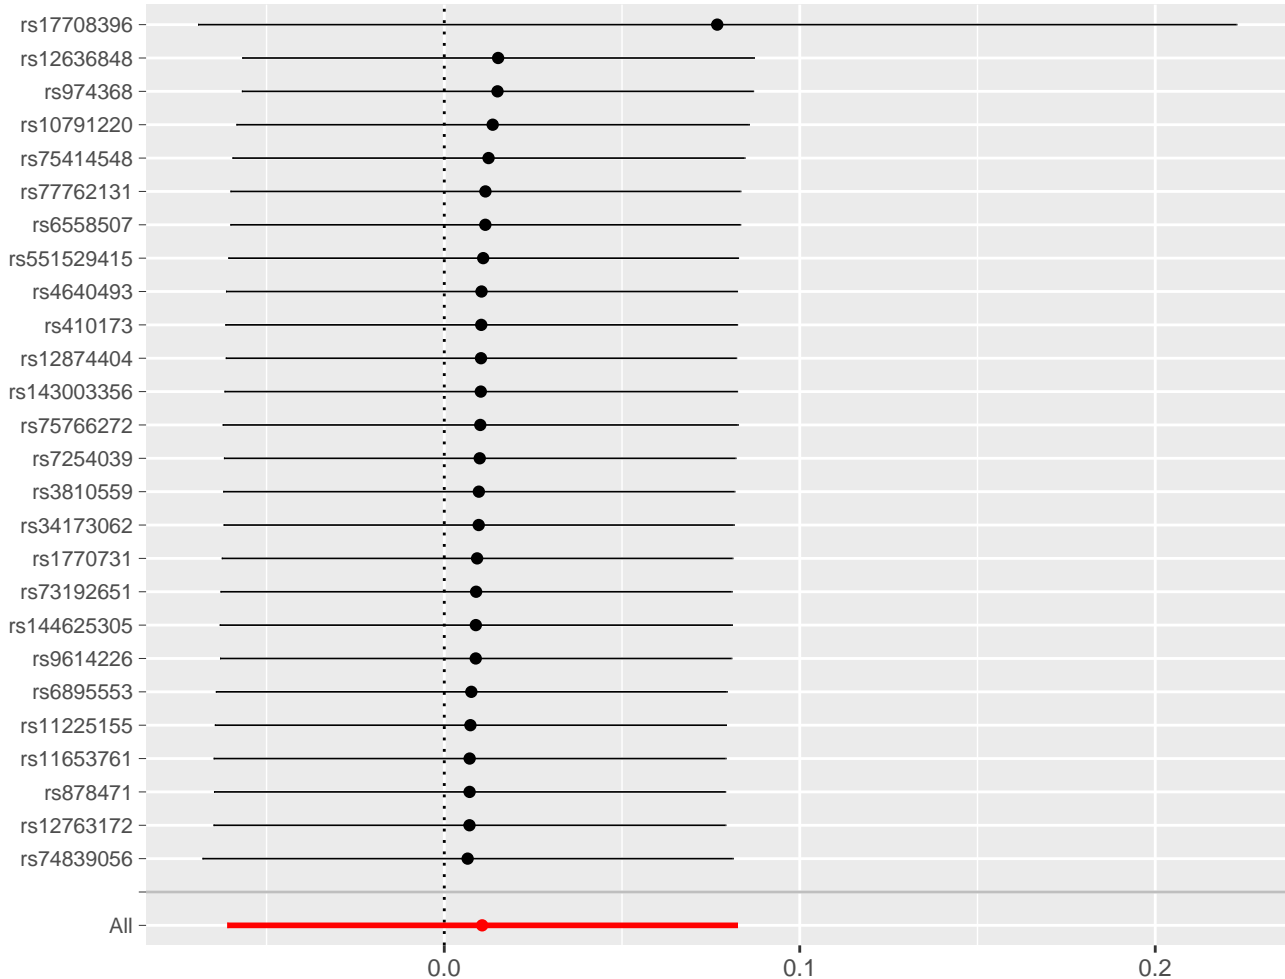

MR leave-one-out sensitivity analysis for 'Memory B cell %lymphocyte' on 'Juvenile arthritis'

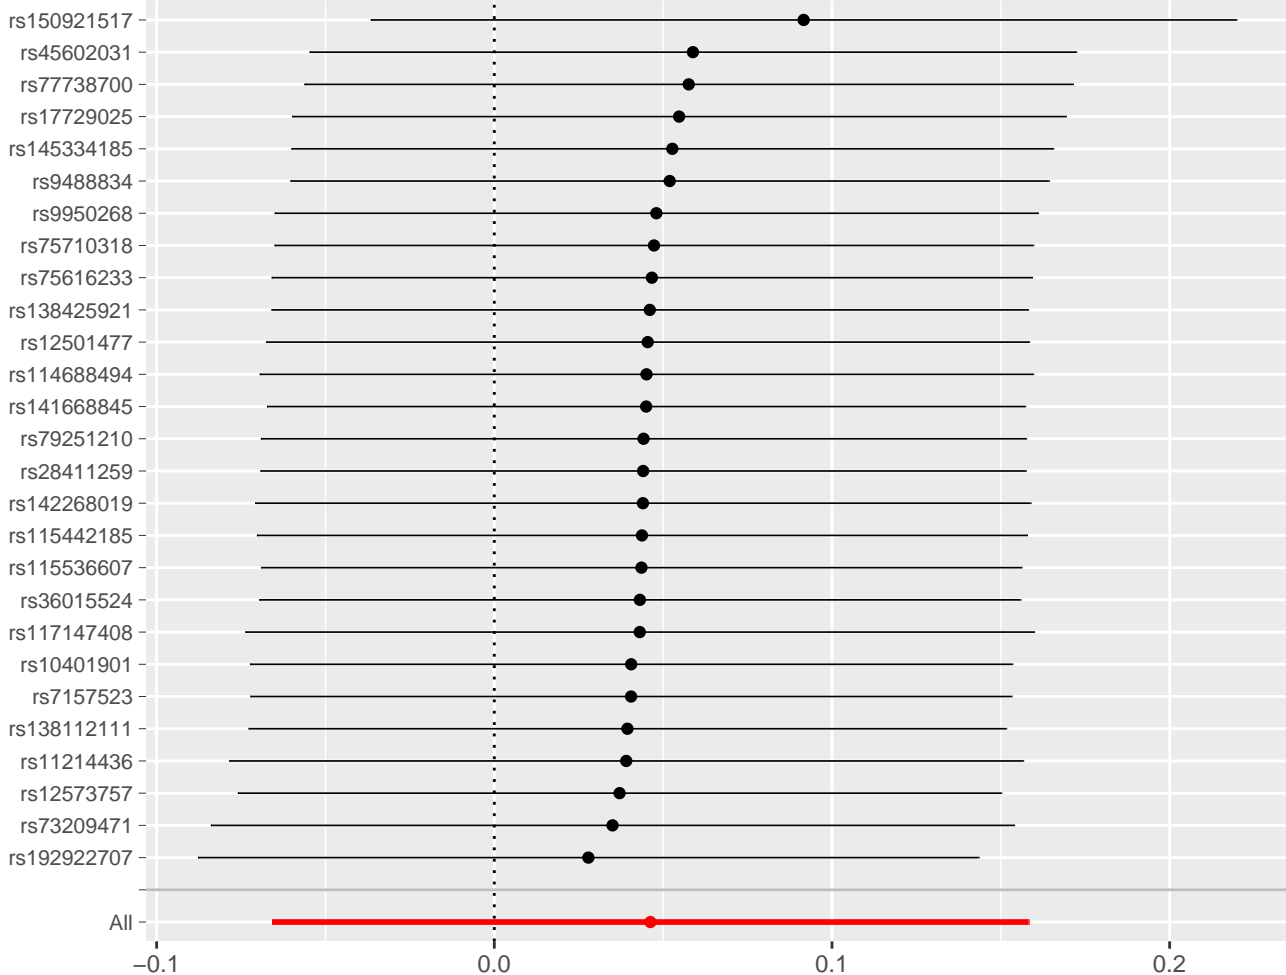

MR leave-one-out sensitivity analysis for 'CD16-CD56 on NKT' on 'Juvenile arthritis'

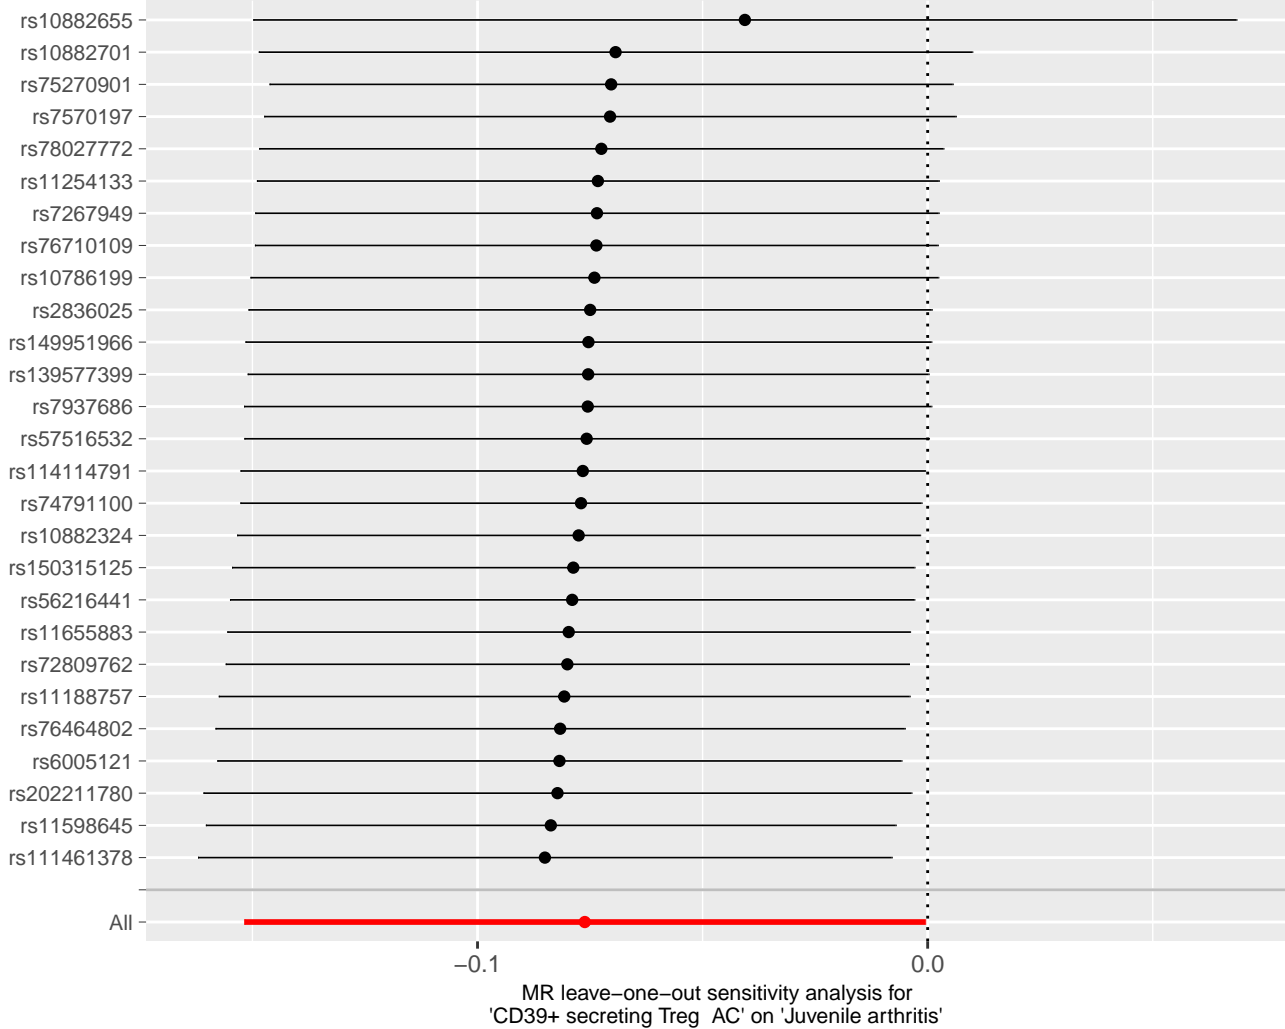

-0.1

0.0

MR leave-one-out sensitivity analysis for  
'CD39+ secreting Treg AC' on 'Juvenile arthritis'

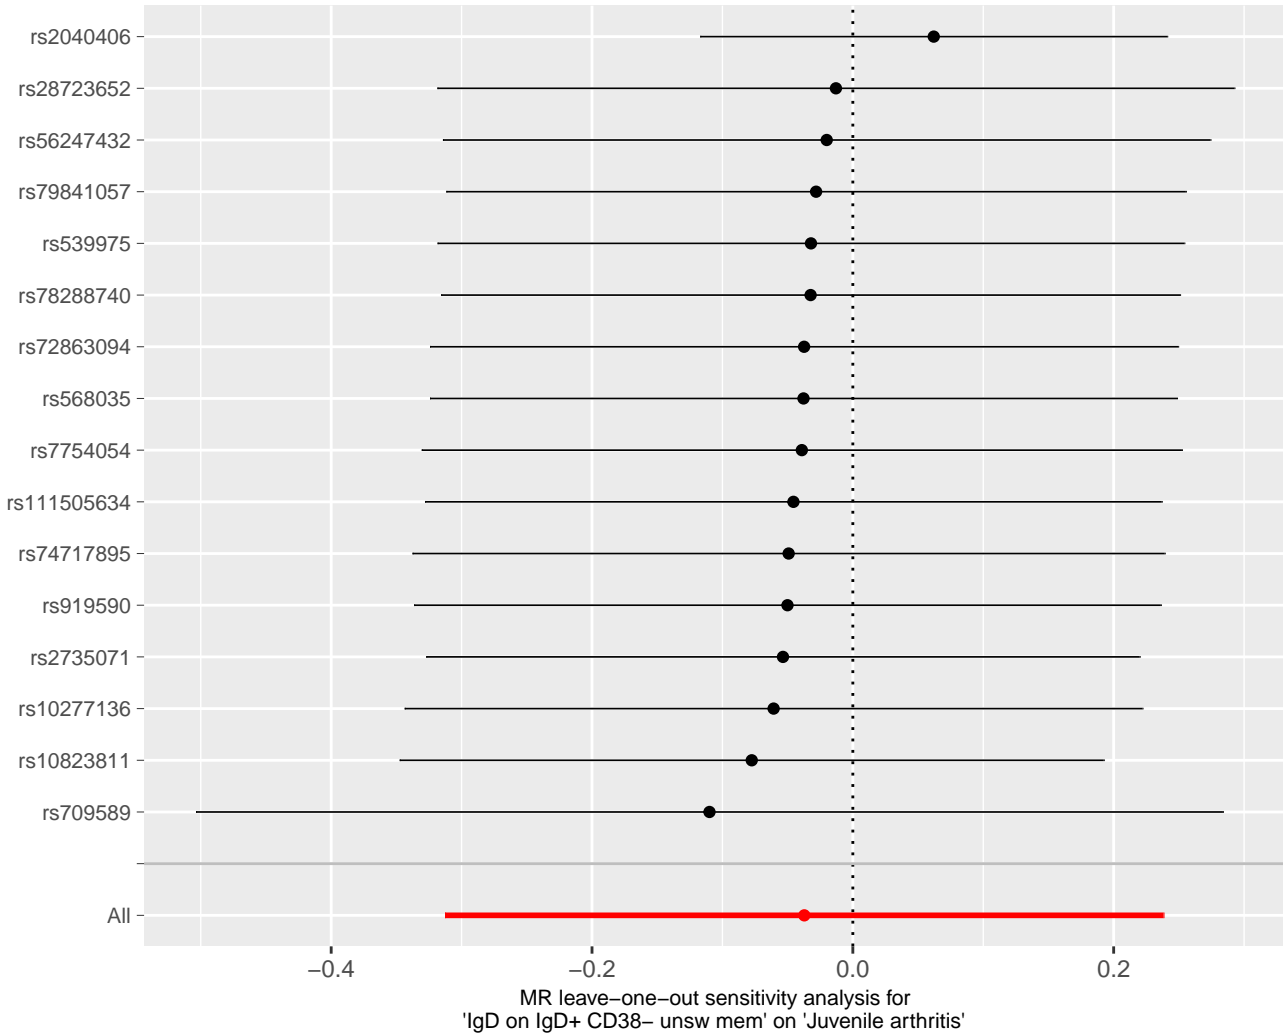

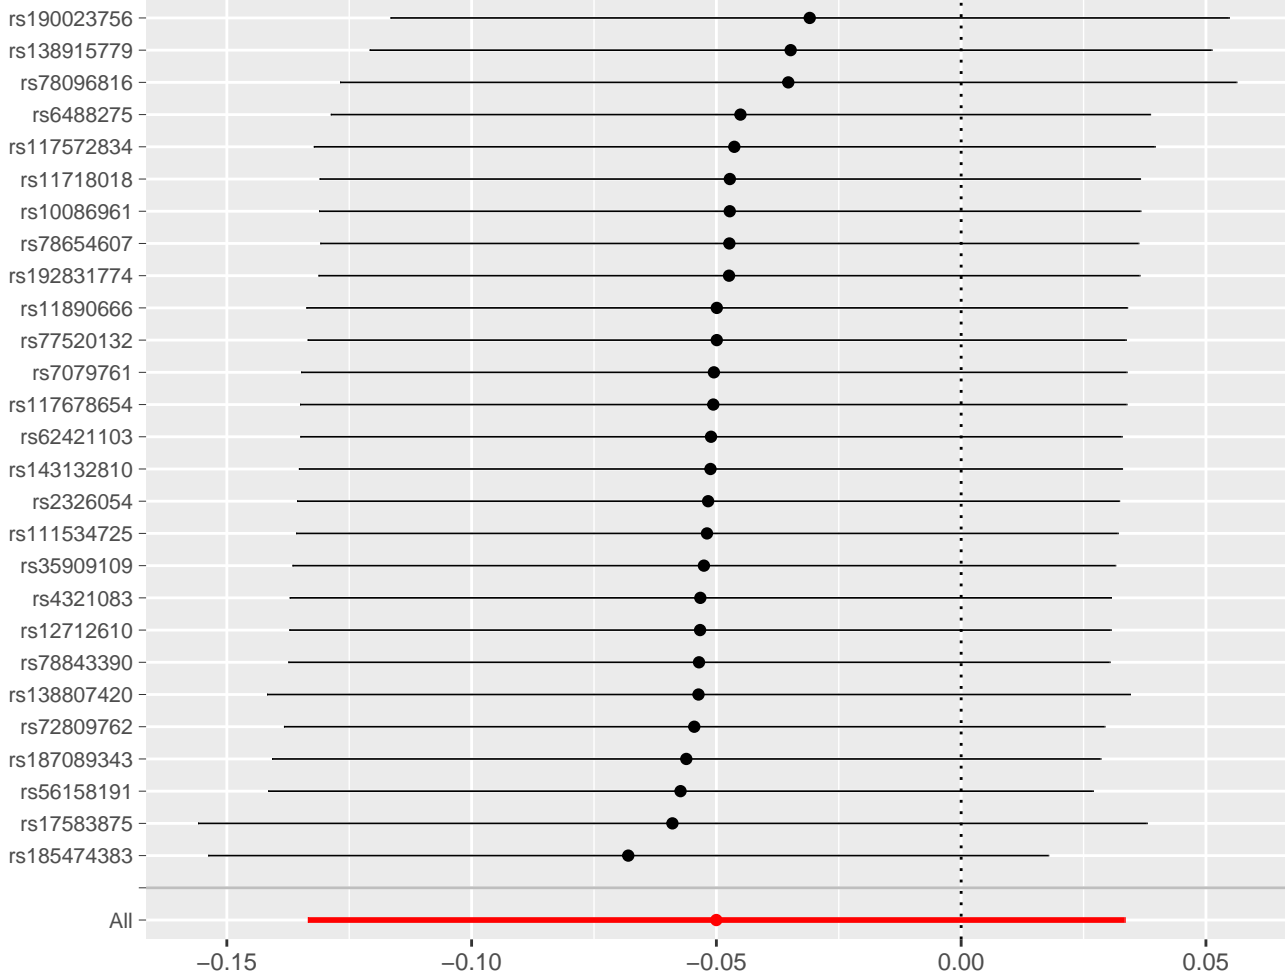

MR leave-one-out sensitivity analysis for 'CD39+ resting Treg AC' on 'Juvenile arthritis'



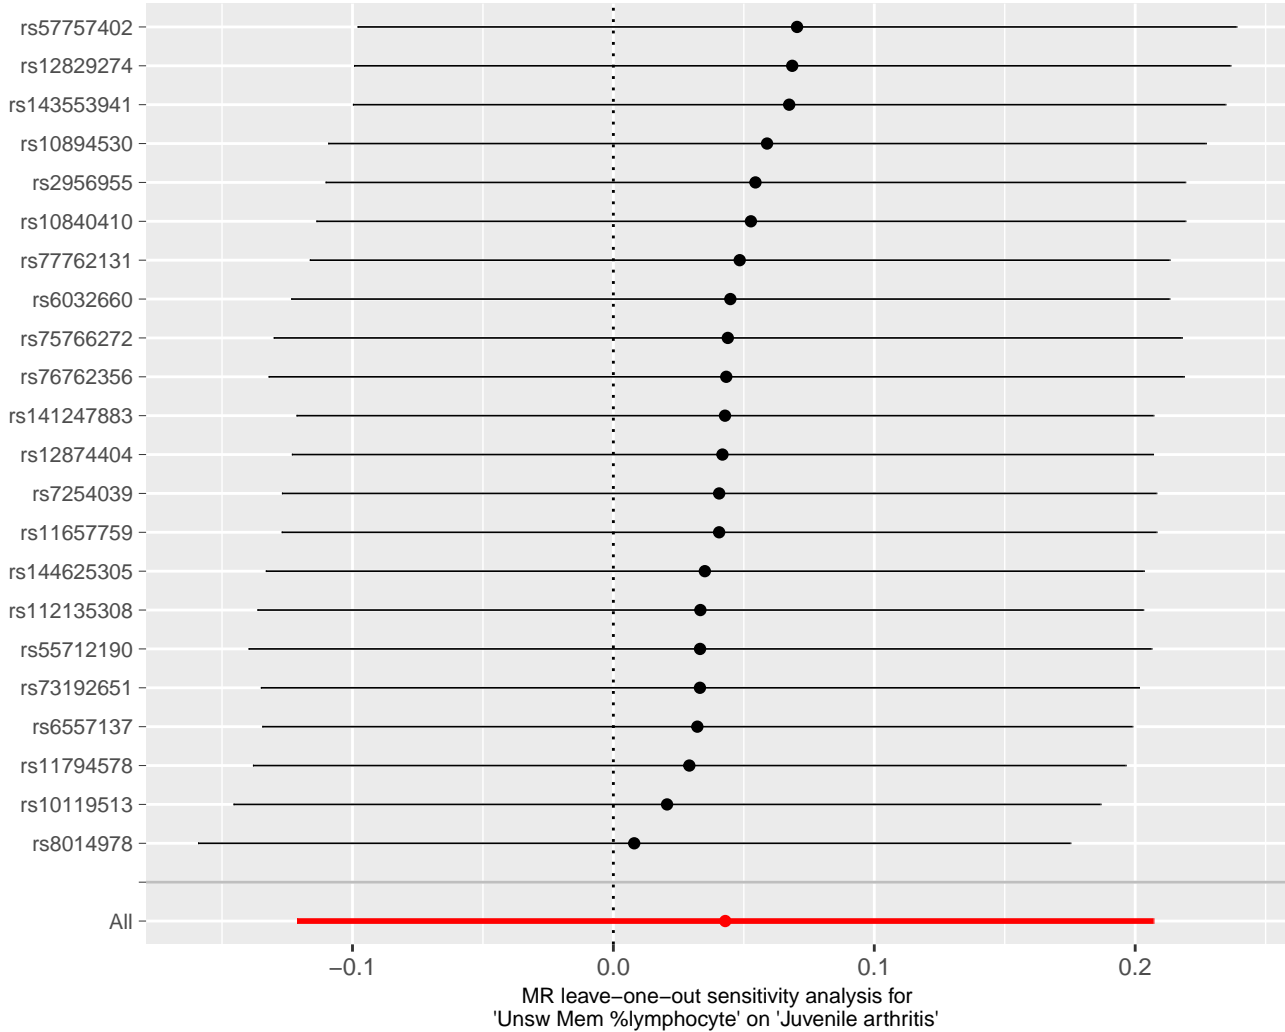

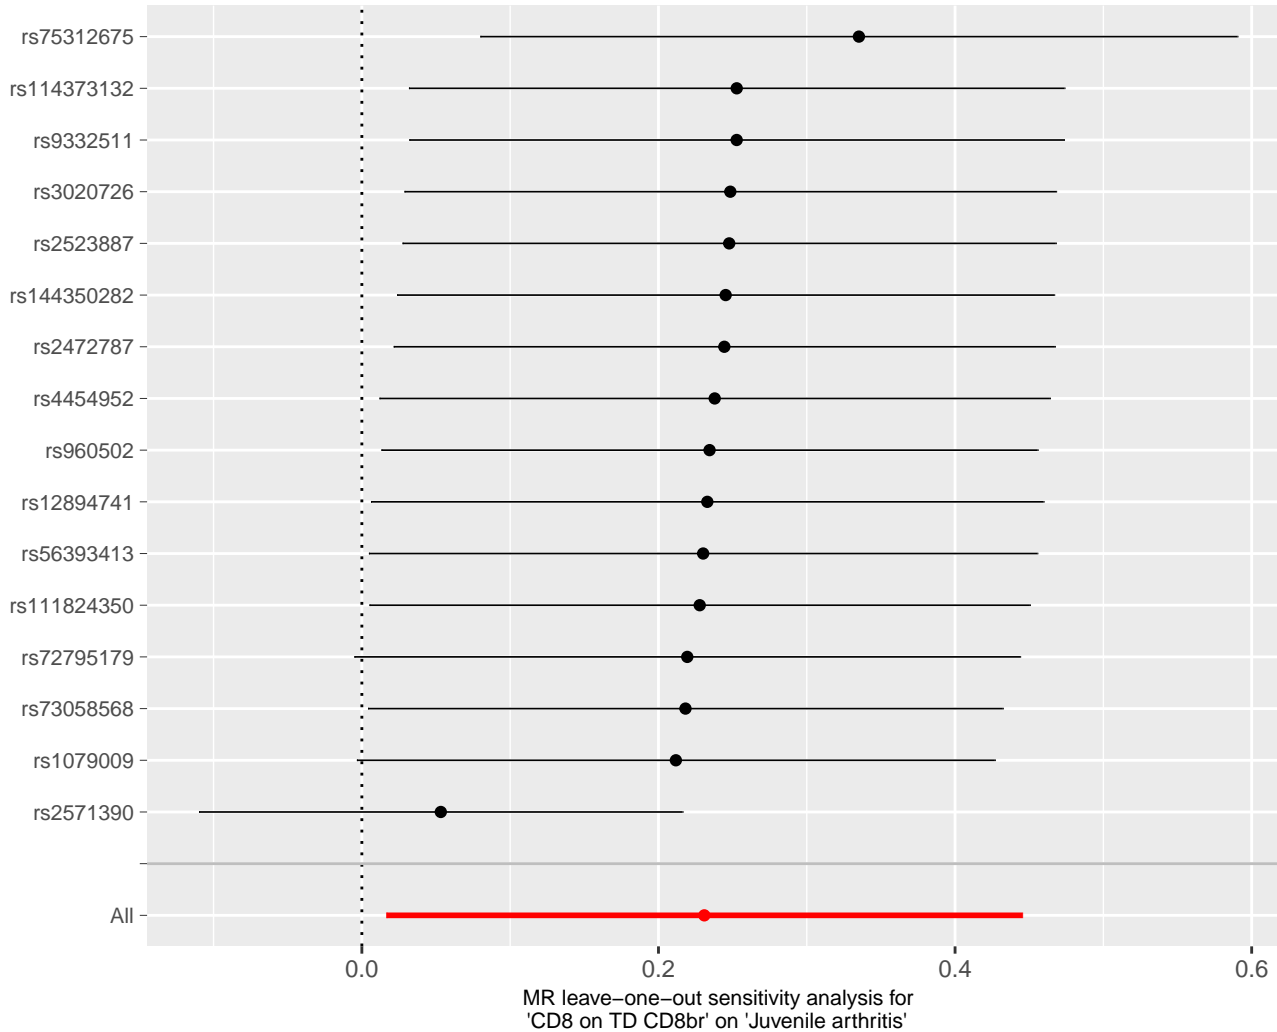

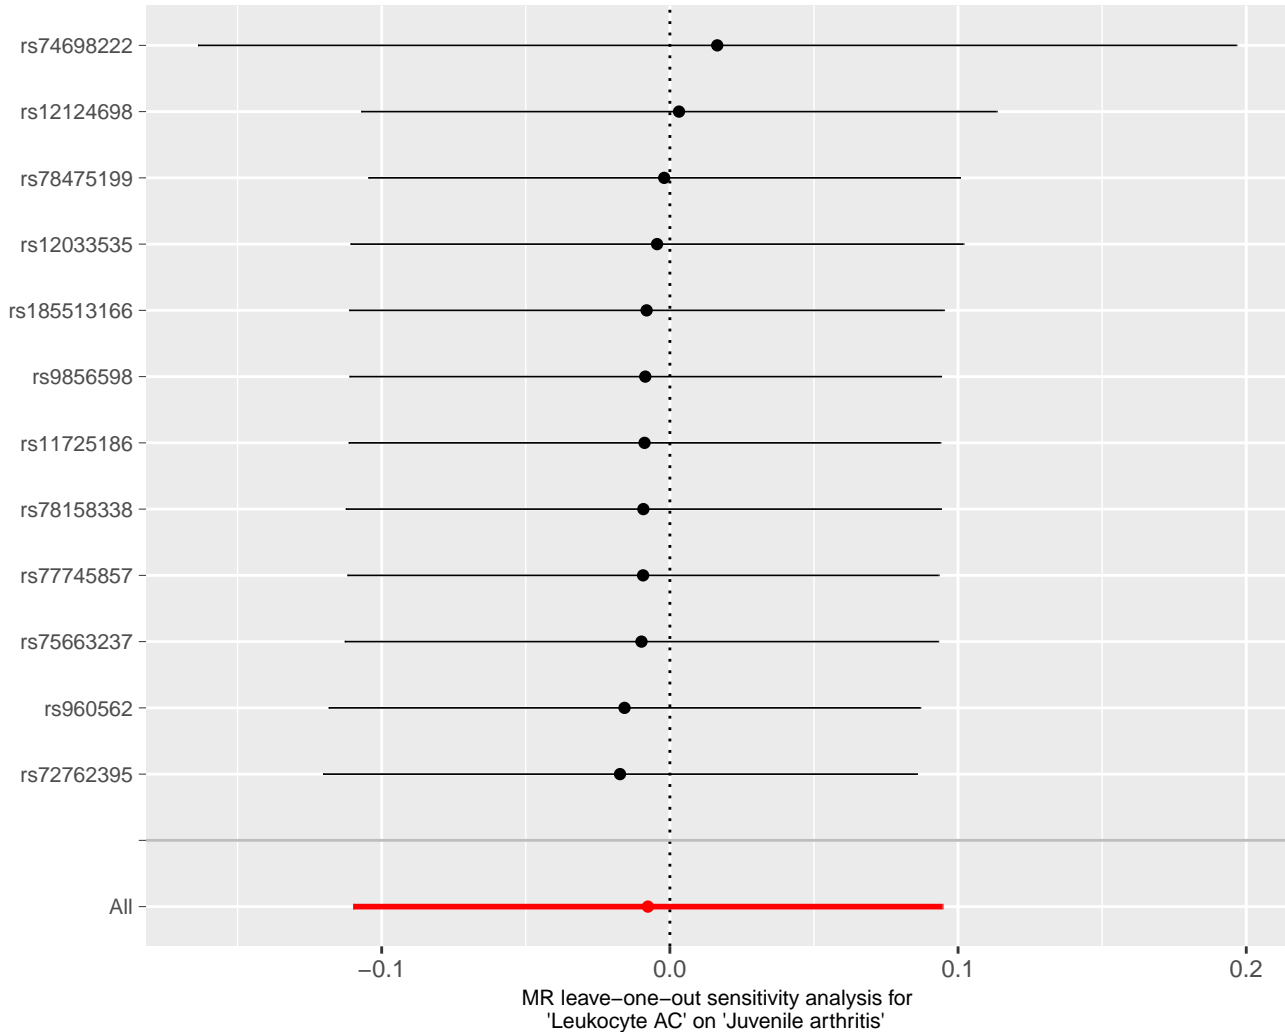

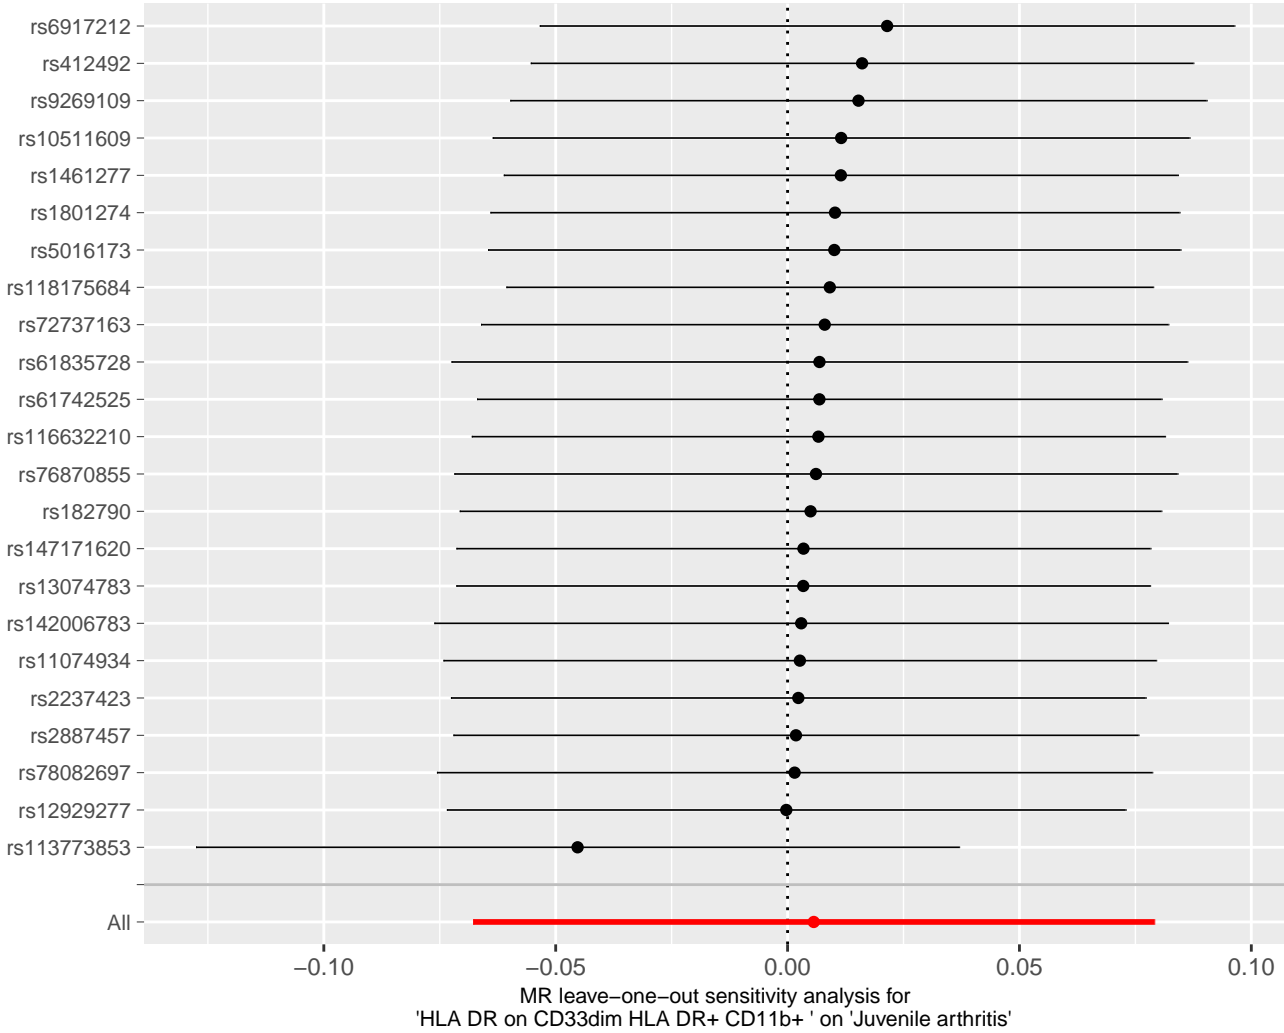

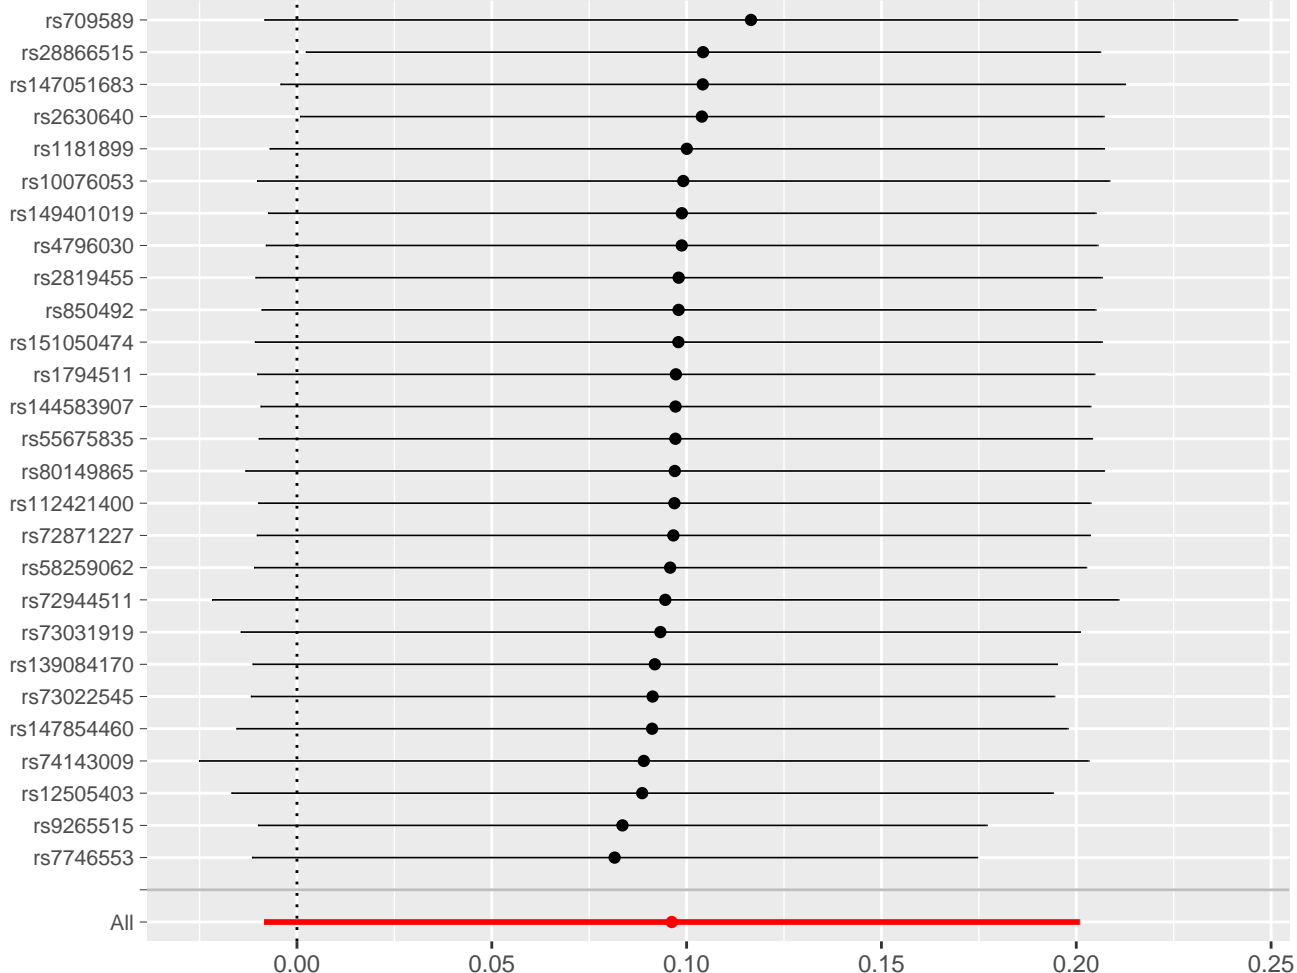

MR leave-one-out sensitivity analysis for 'IgD on IgD+ CD24+' on 'Juvenile arthritis'

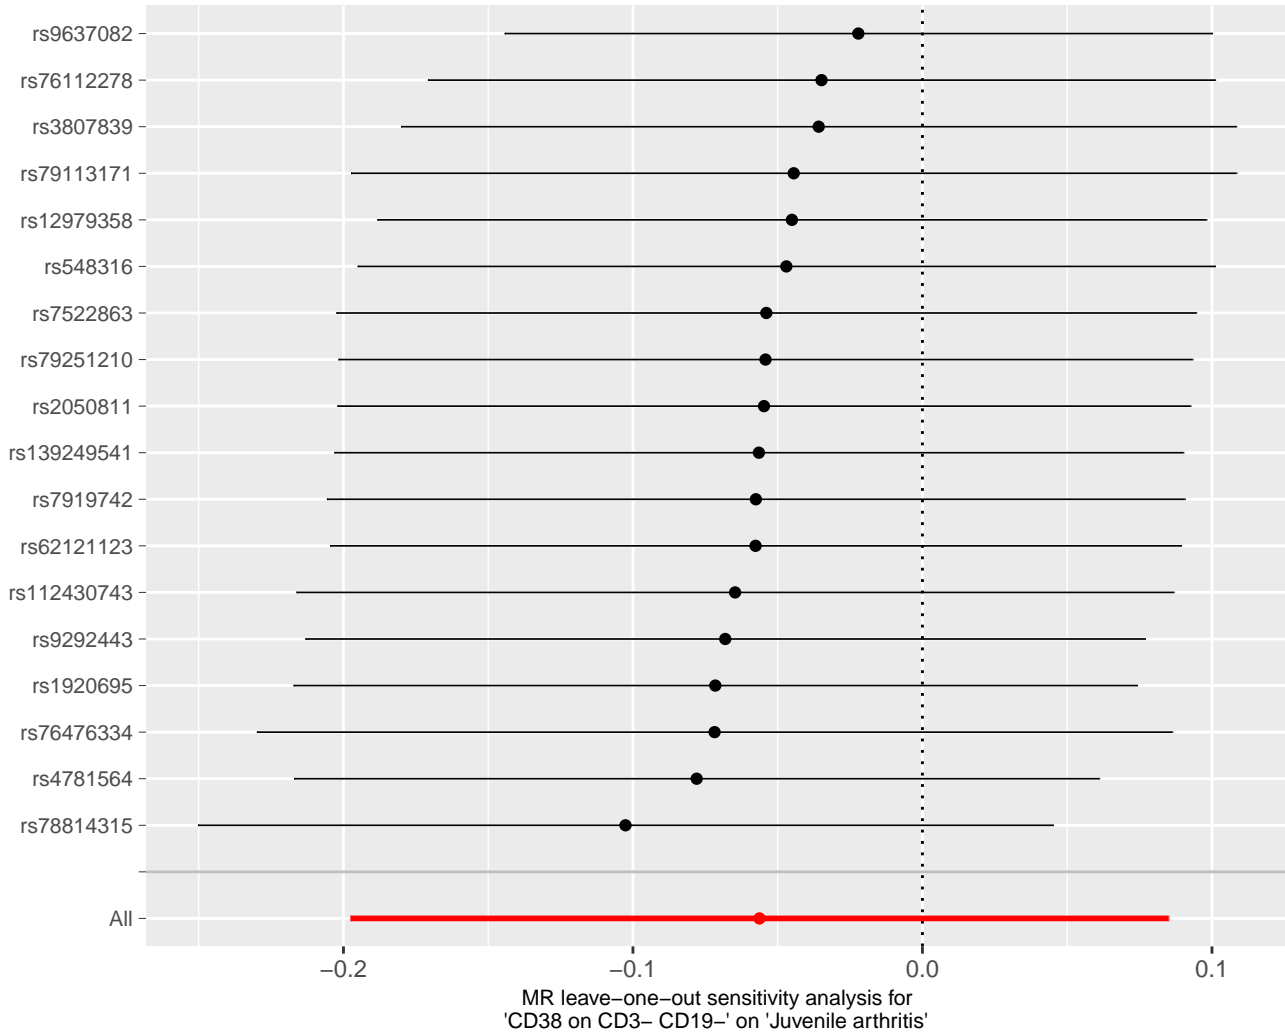

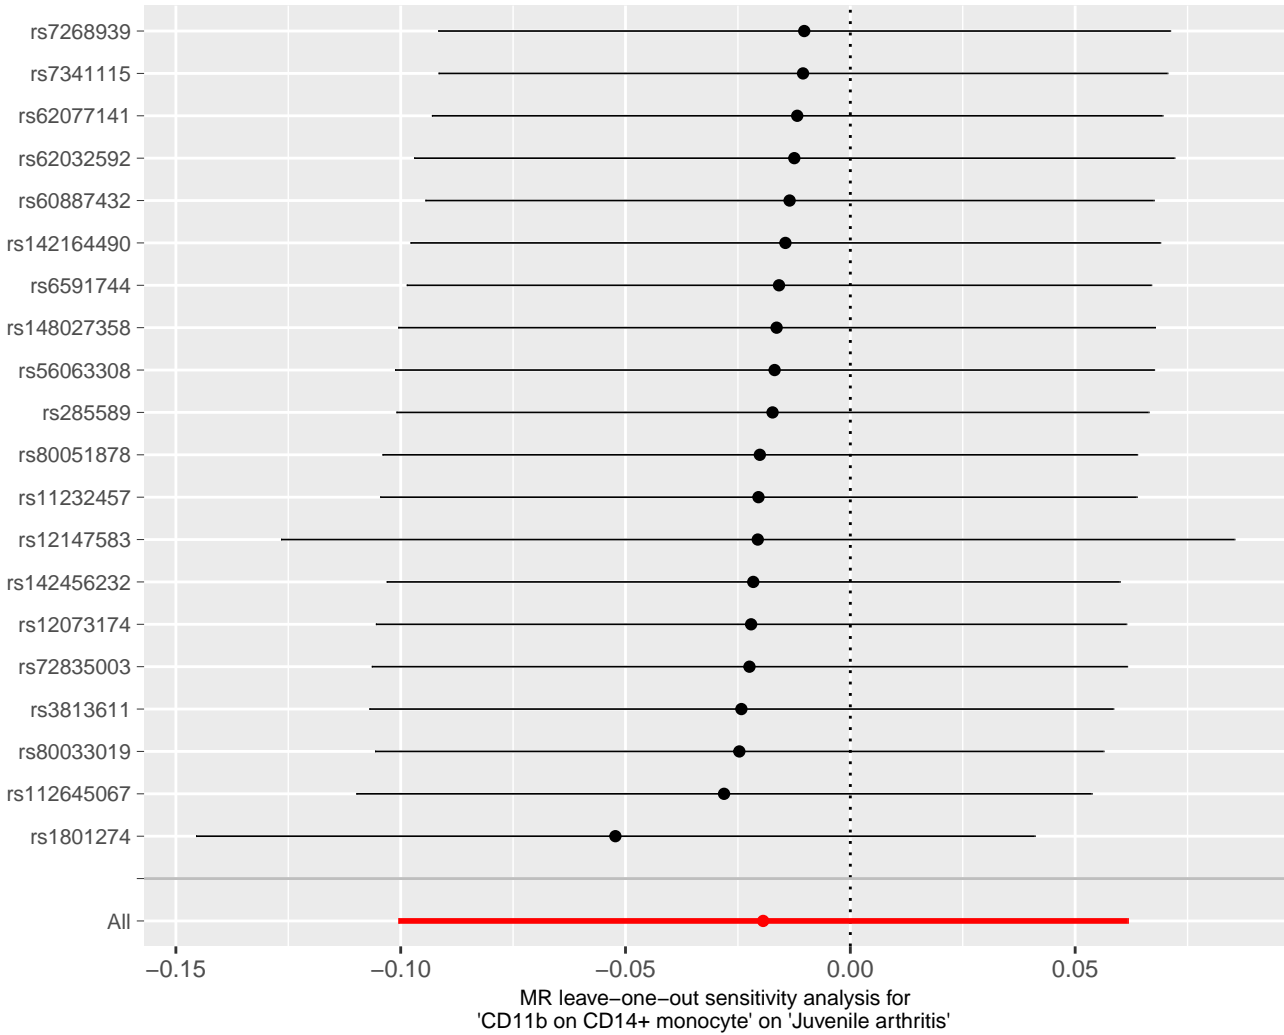

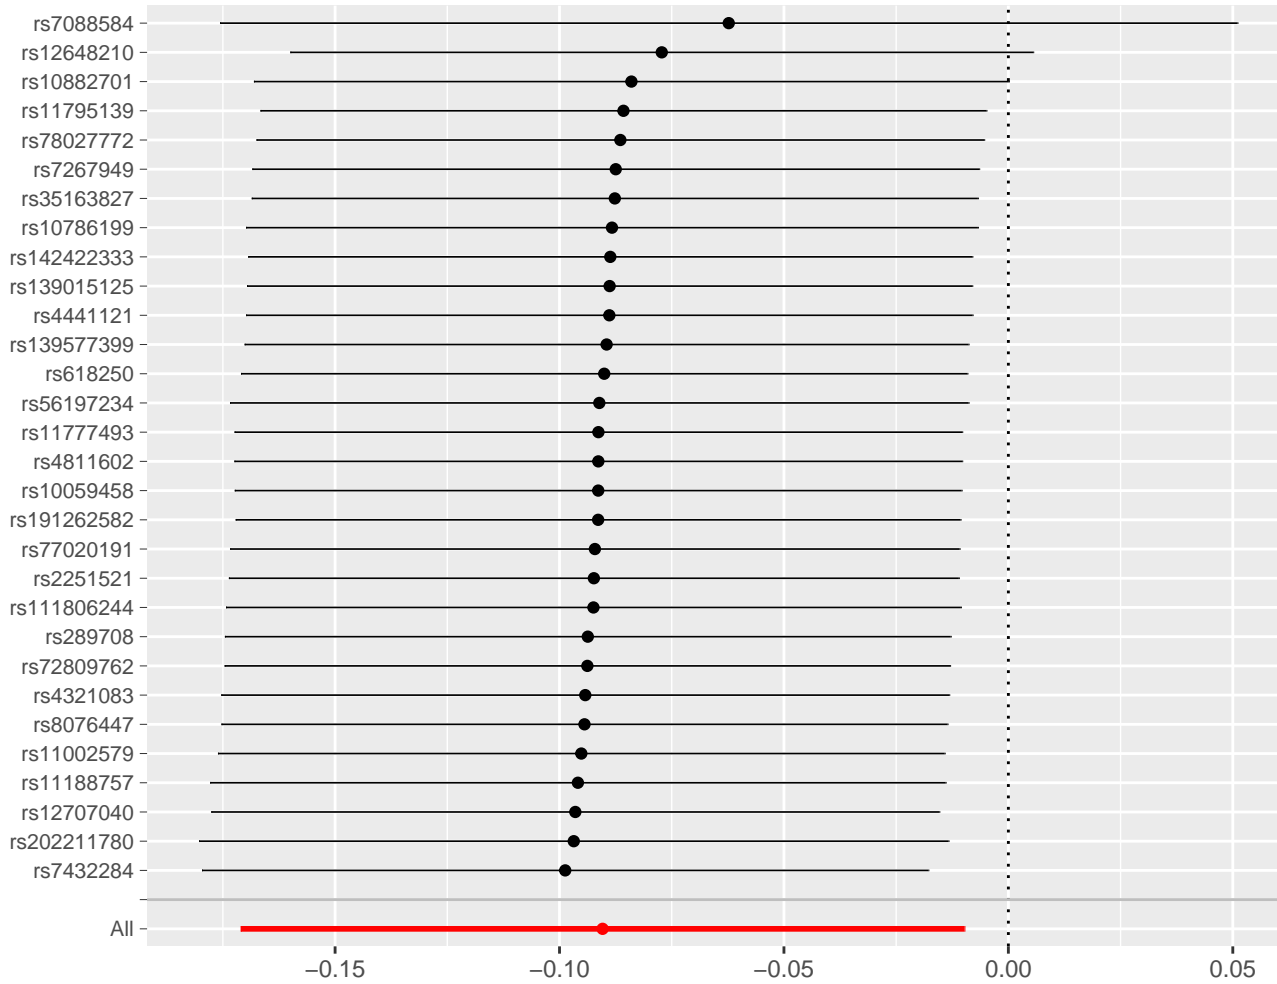

MR leave-one-out sensitivity analysis for 'CD39+ activated Treg AC' on 'Juvenile arthritis'



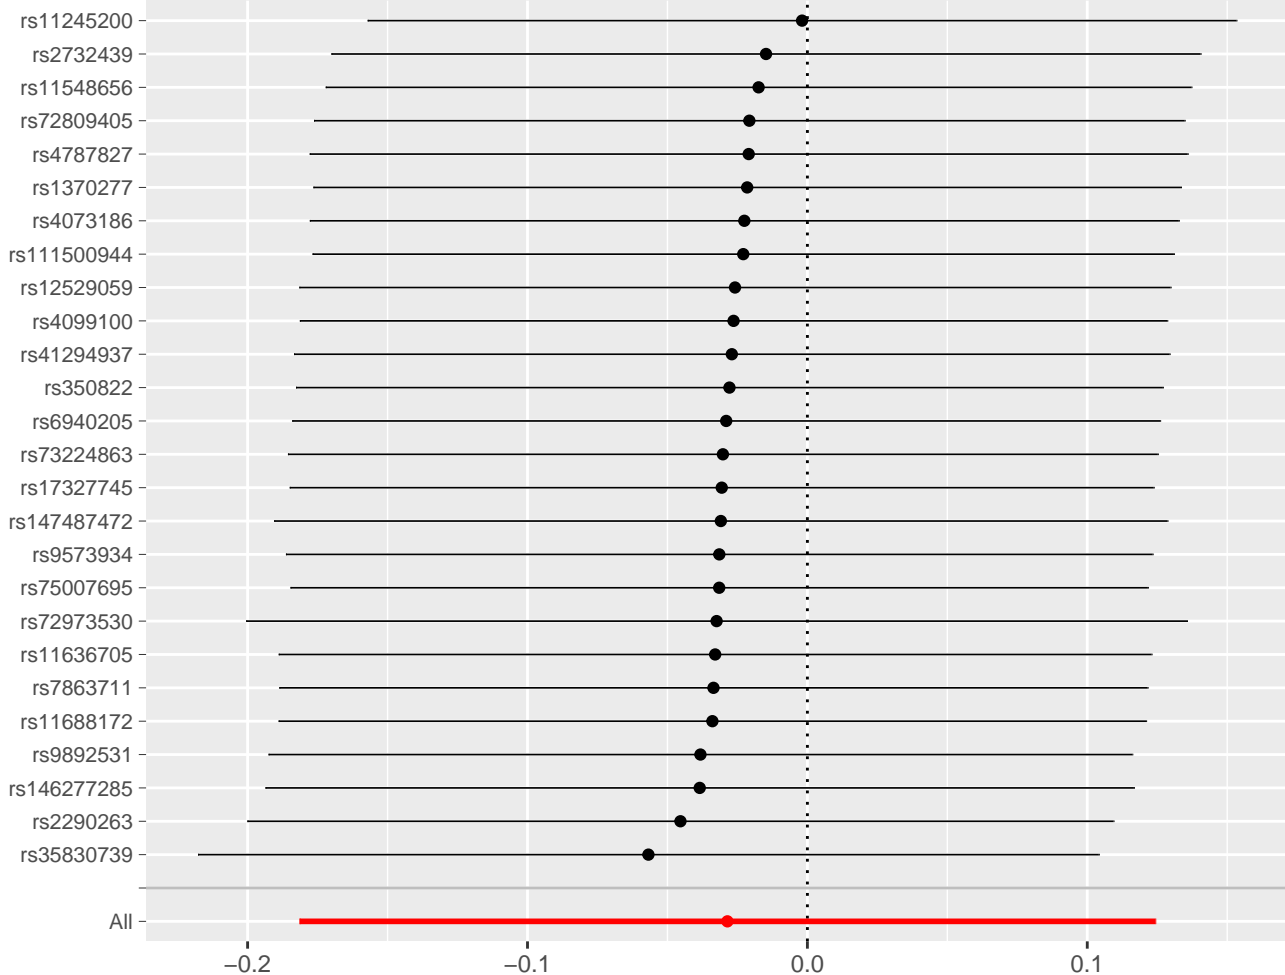

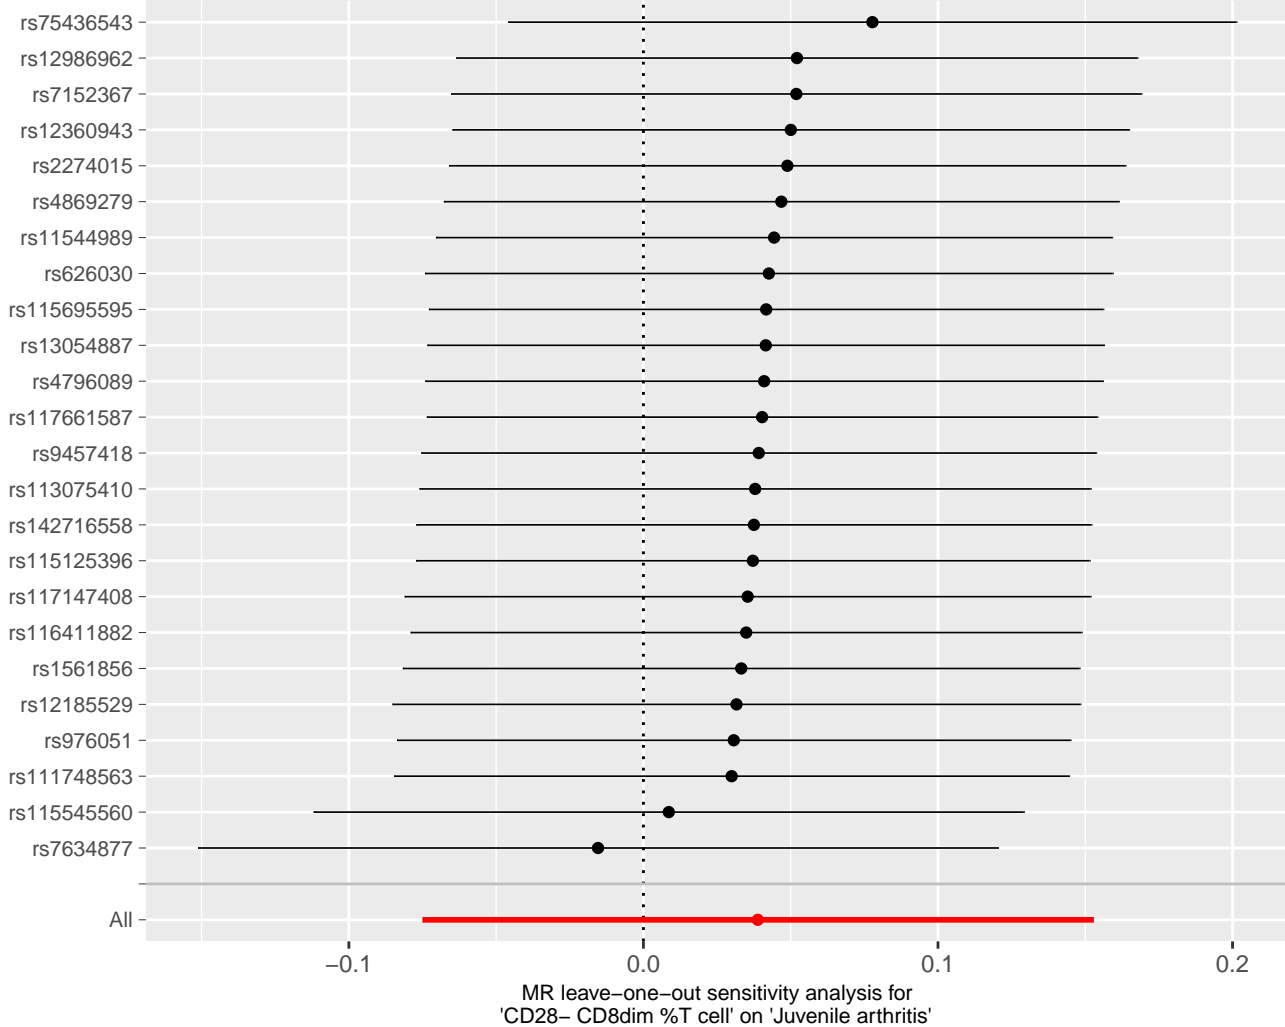

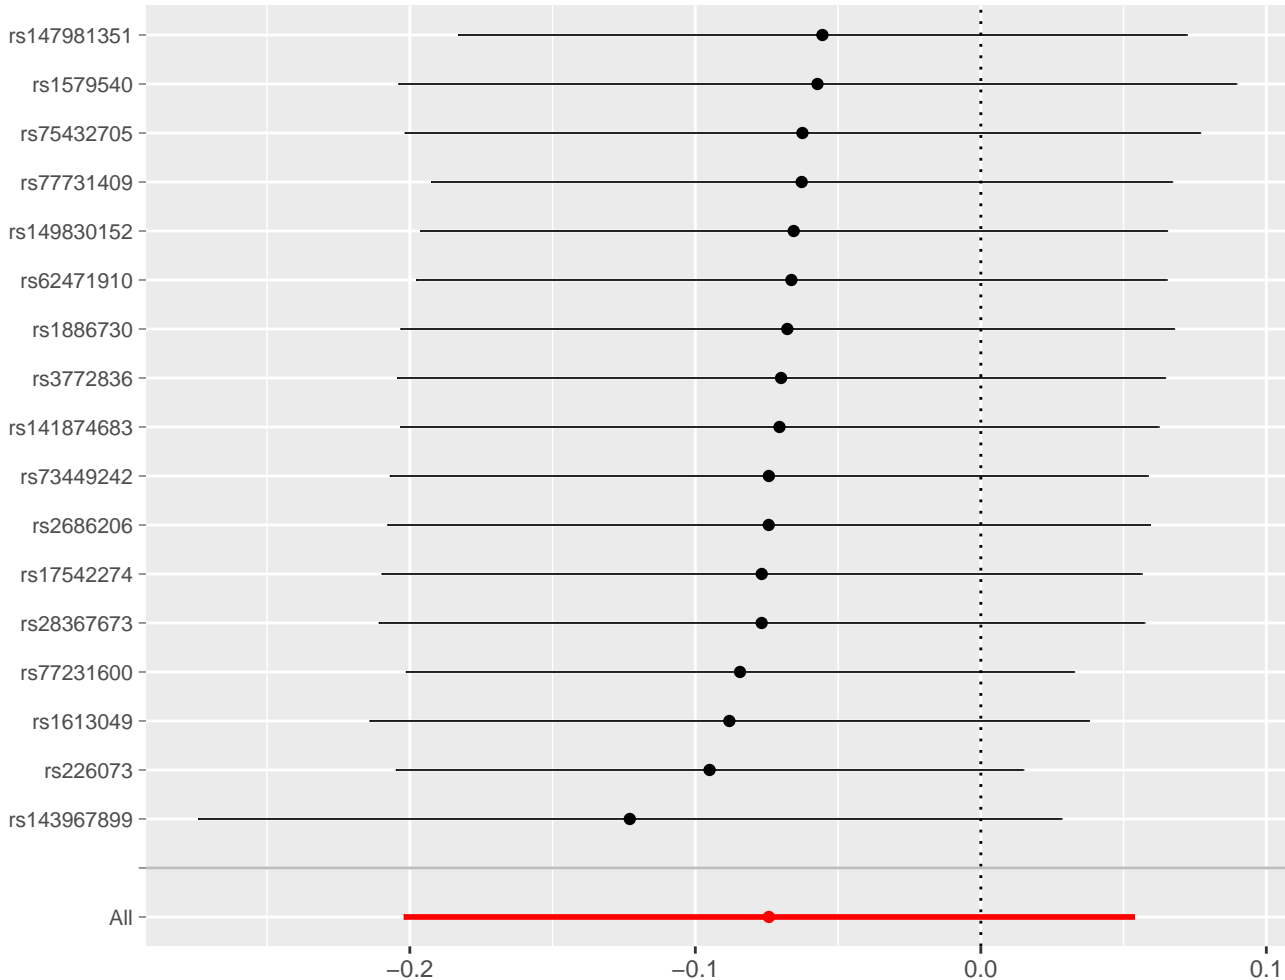

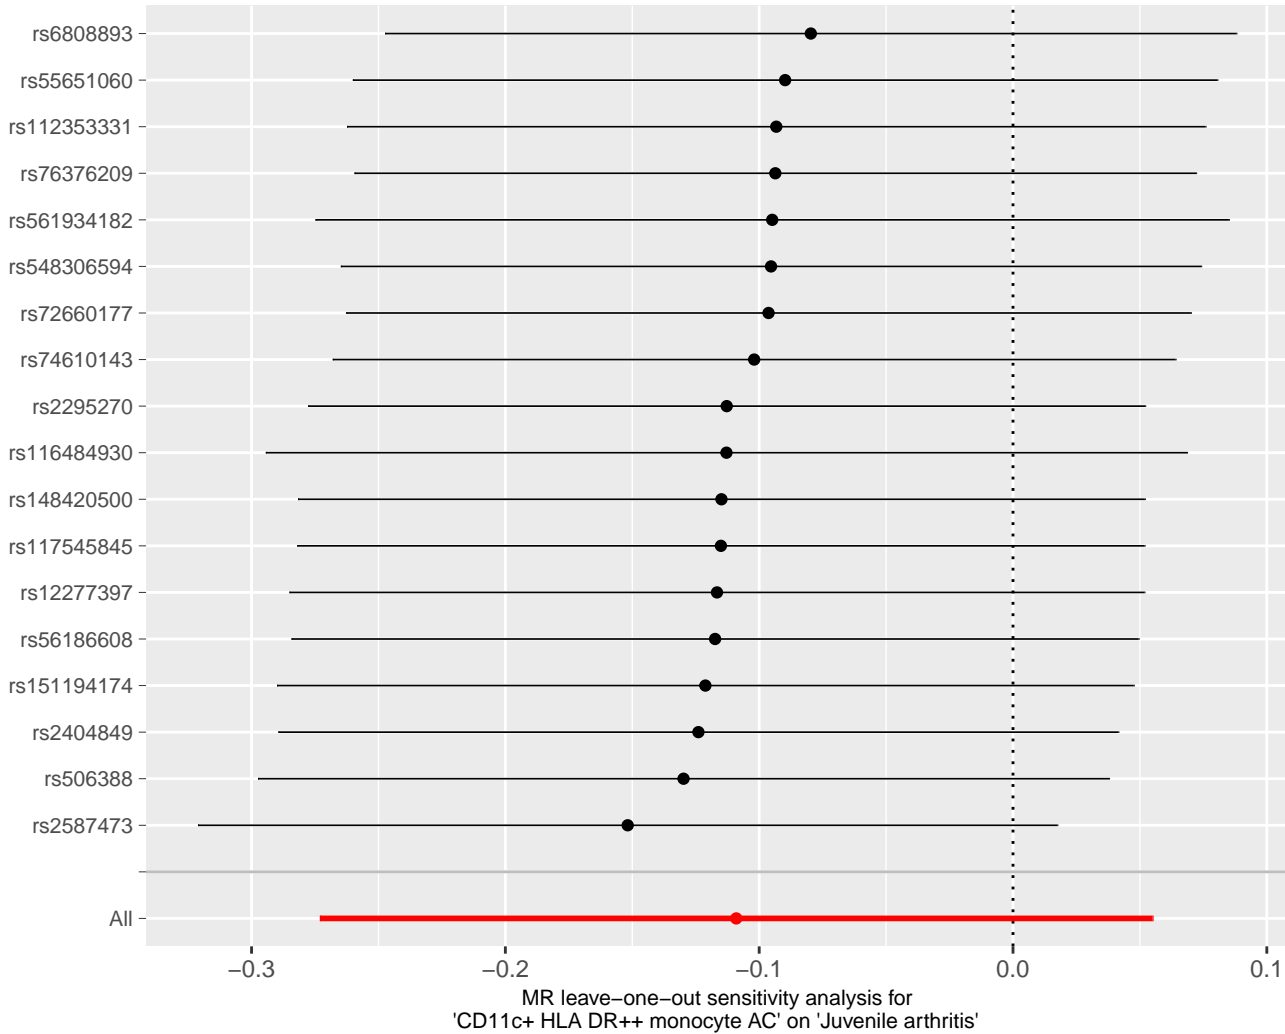

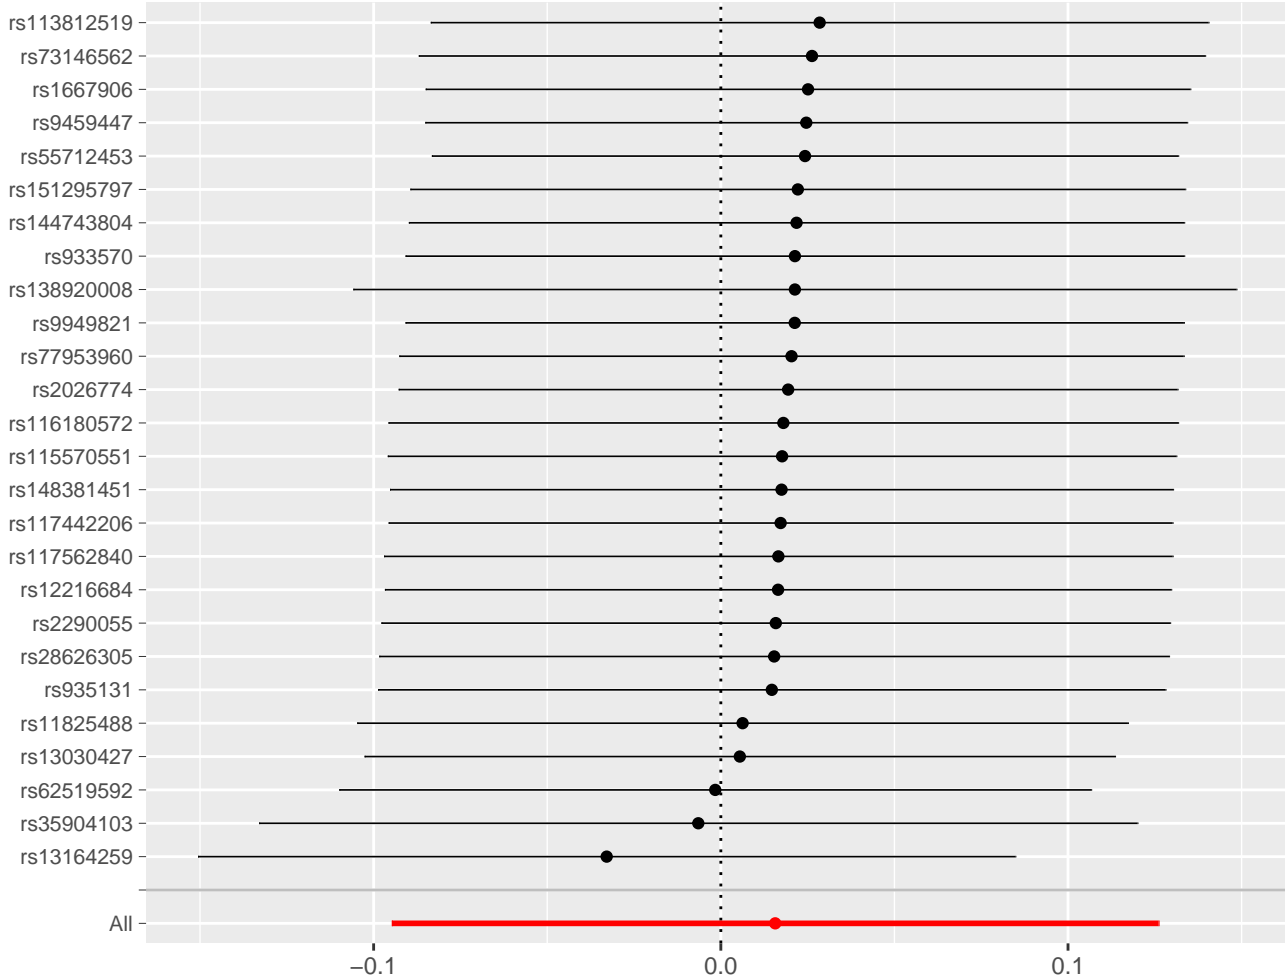

MR leave-one-out sensitivity analysis for 'CD19 on transitional' on 'Juvenile arthritis'

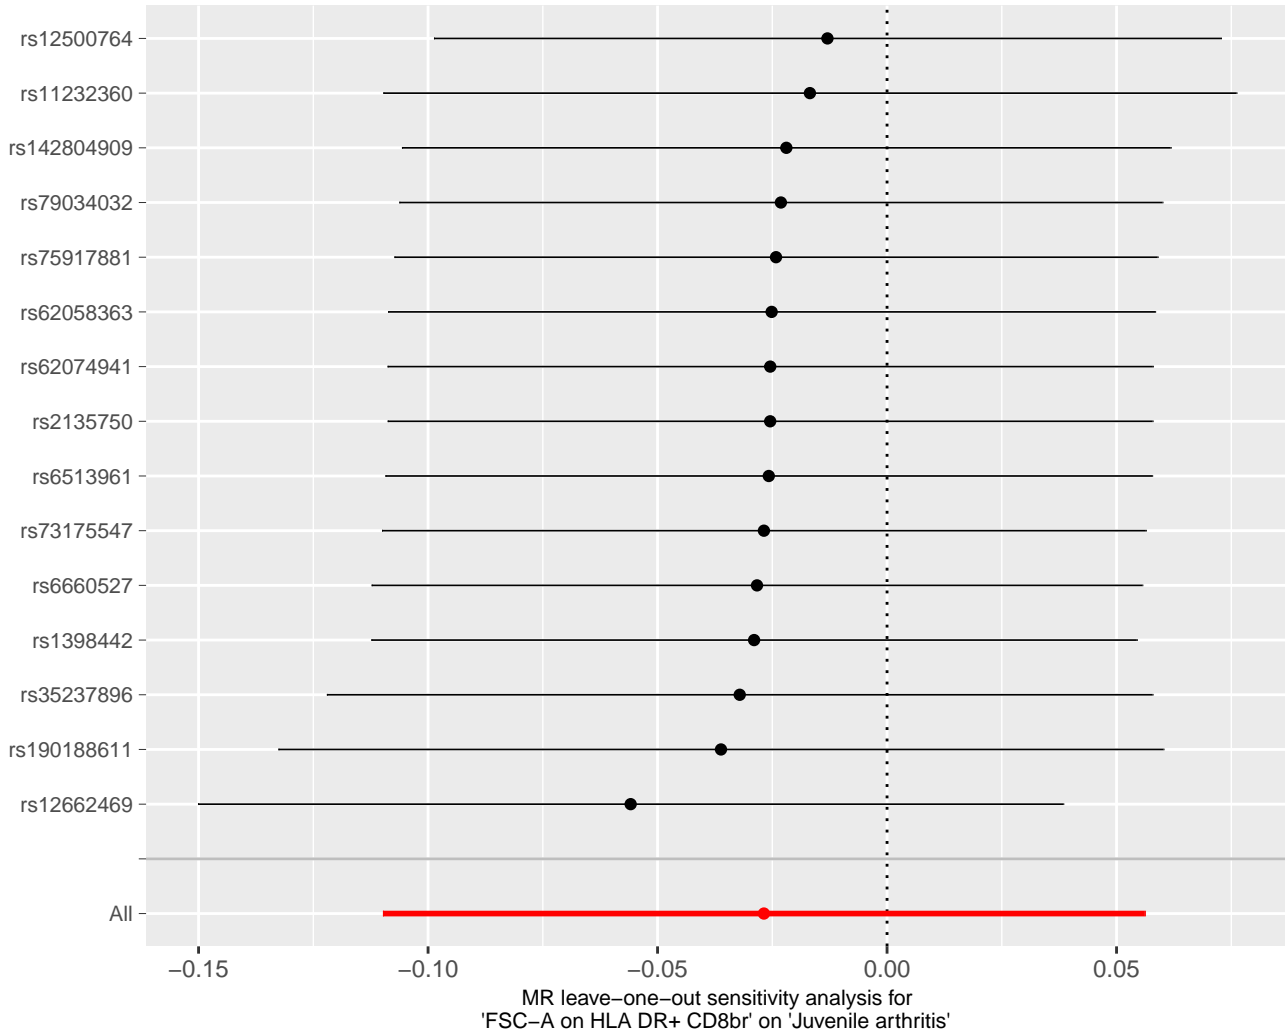

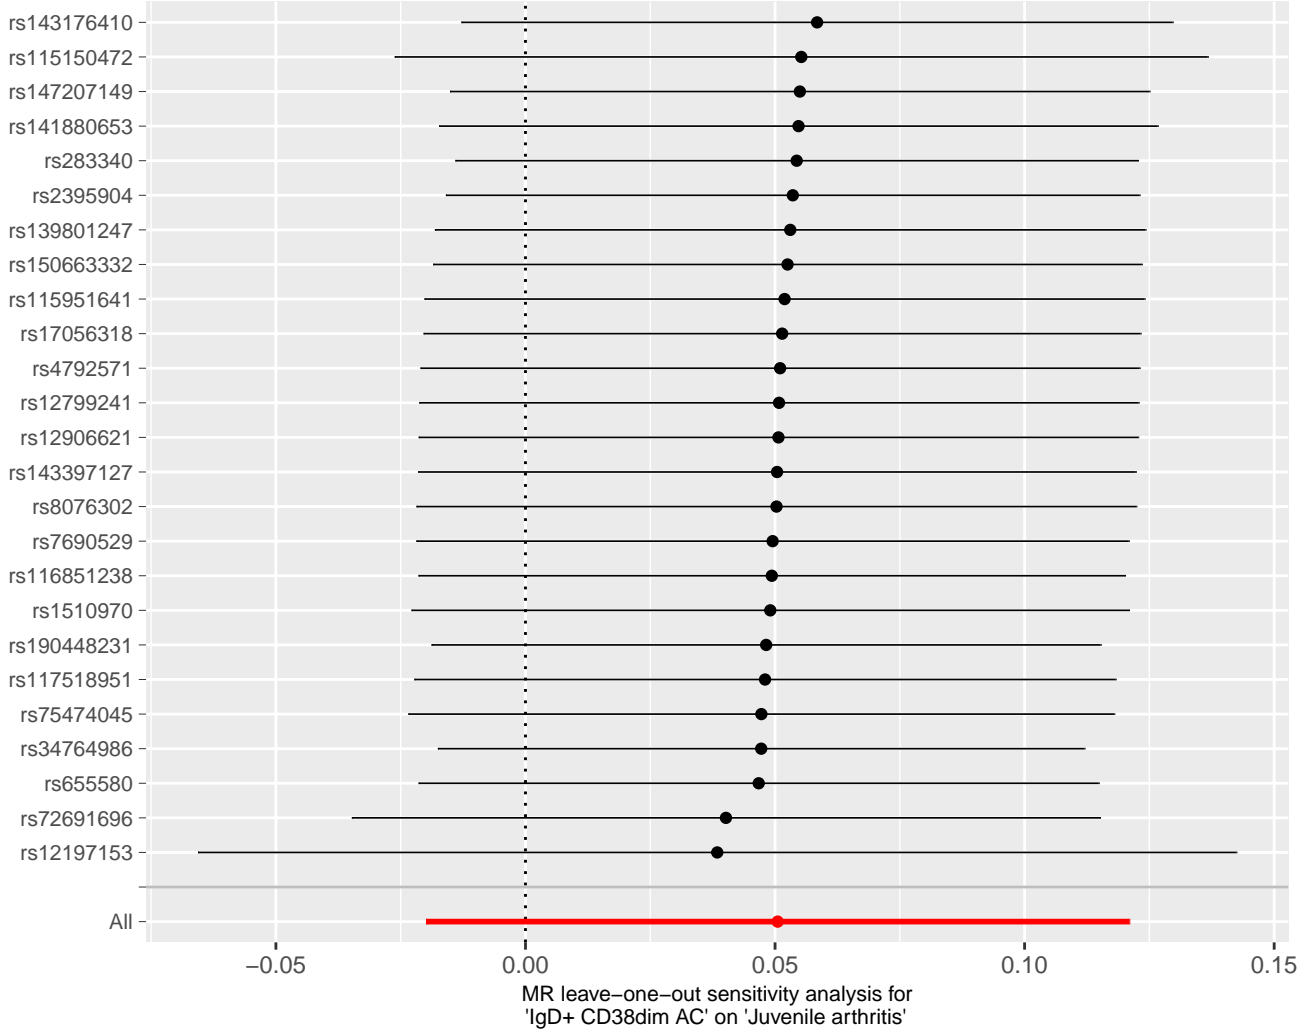

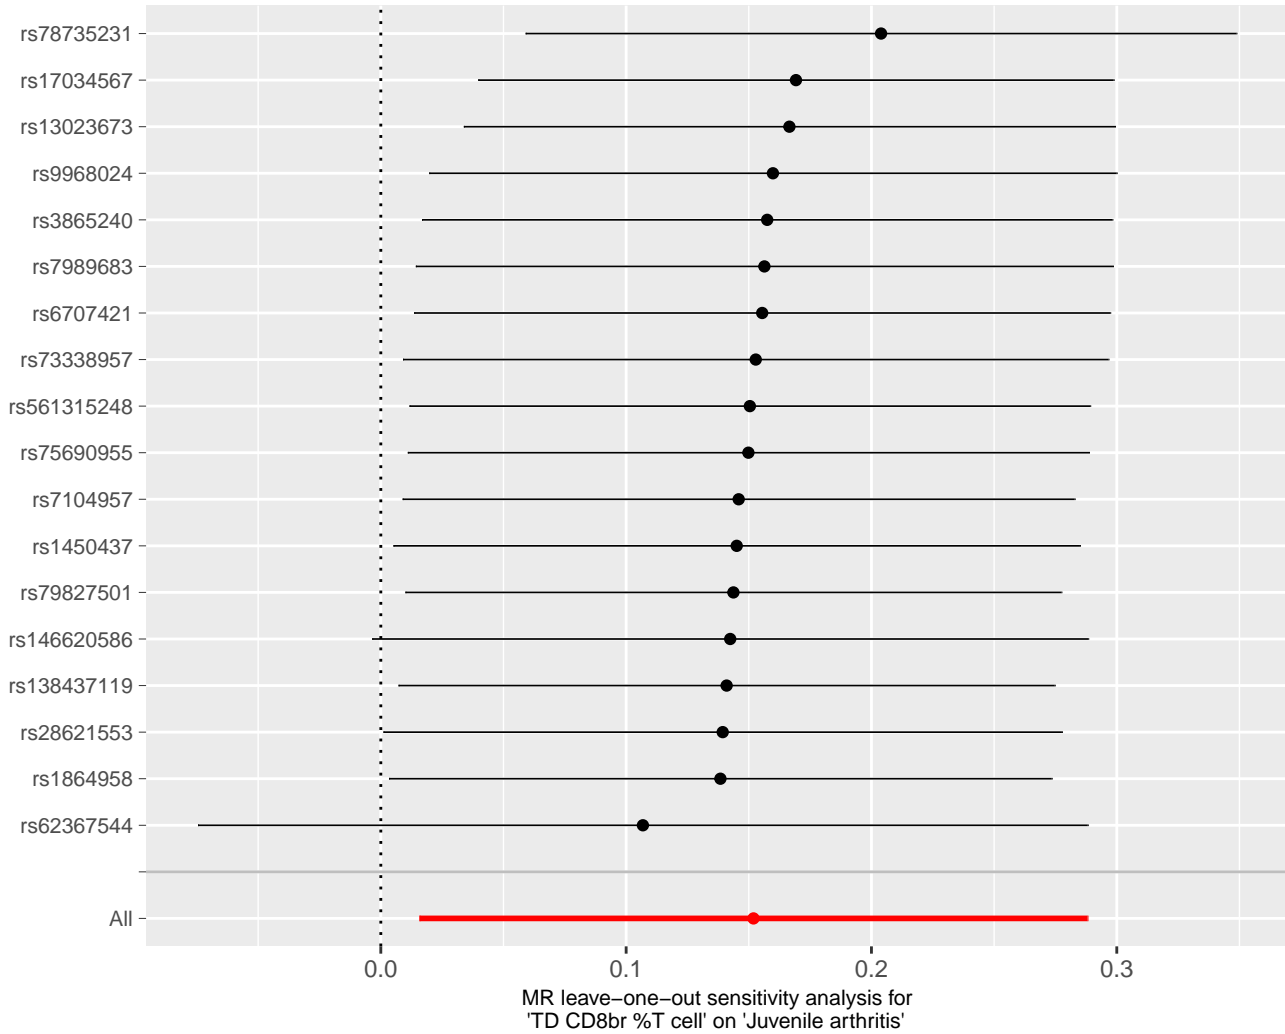



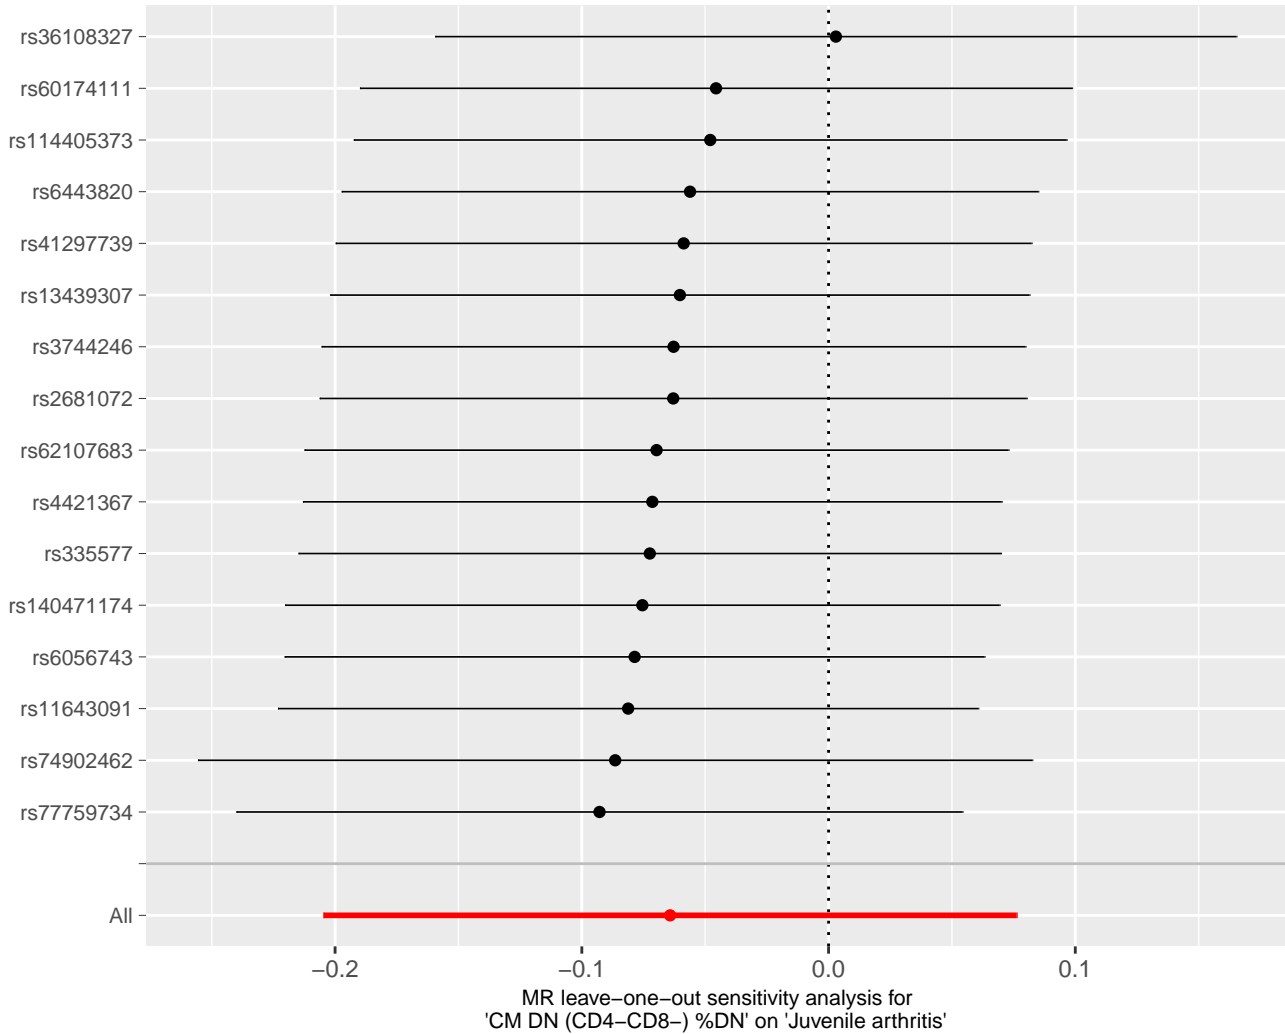

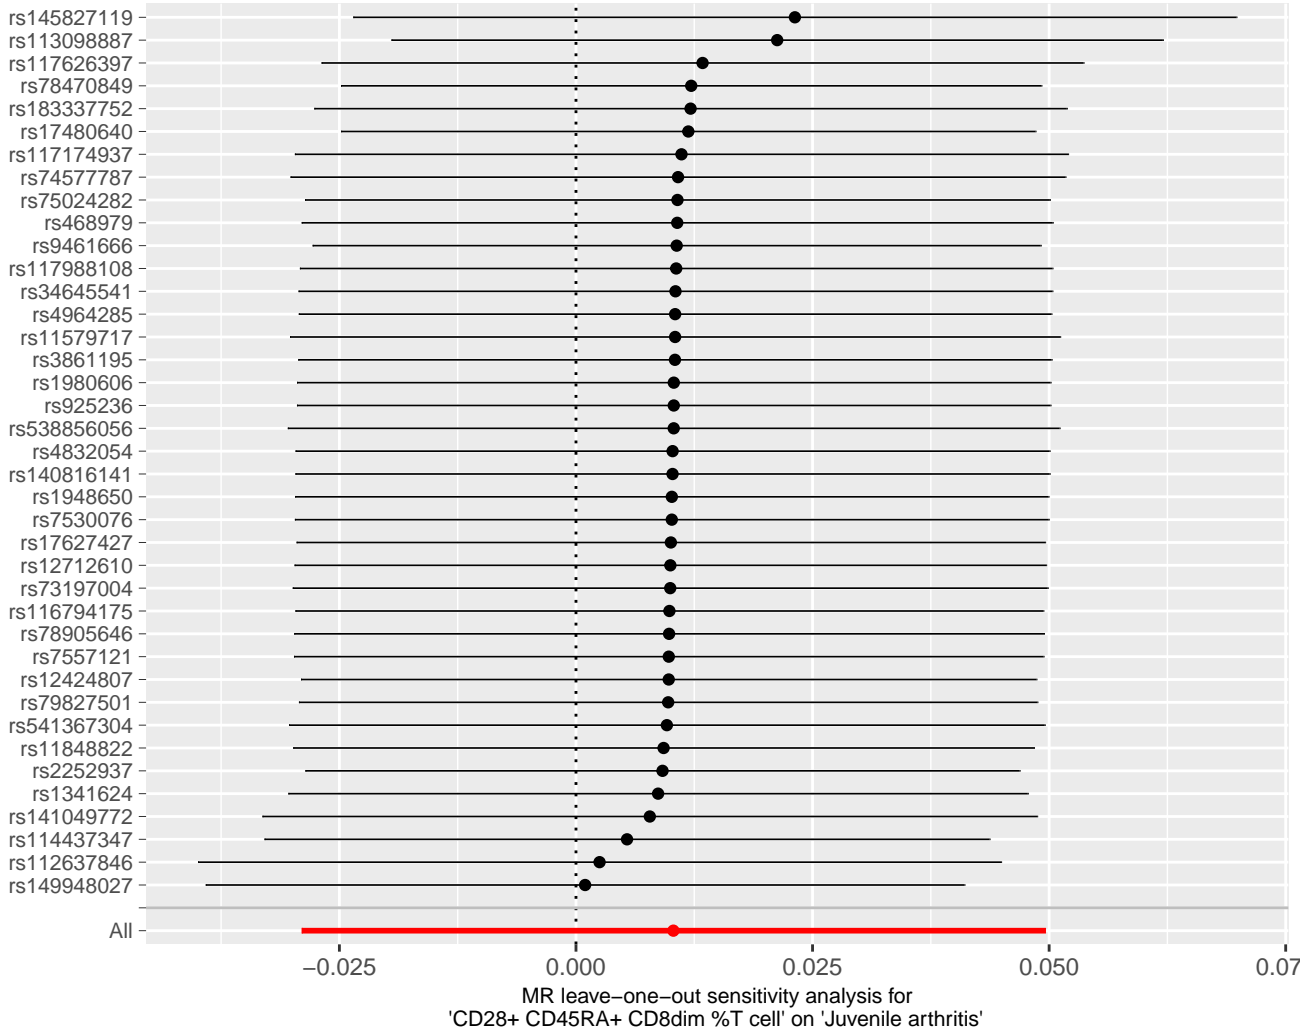

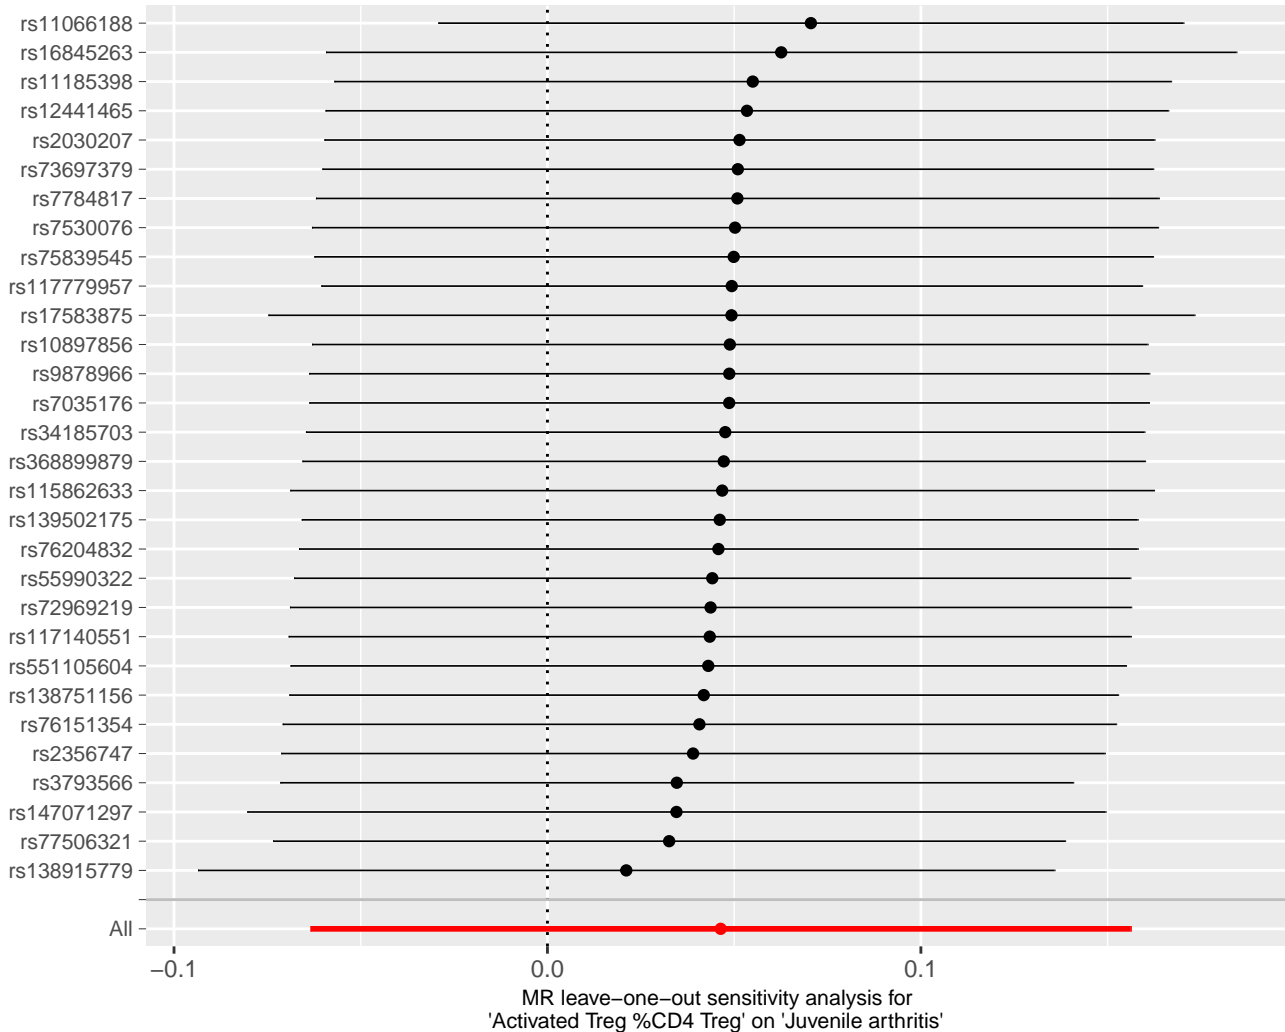

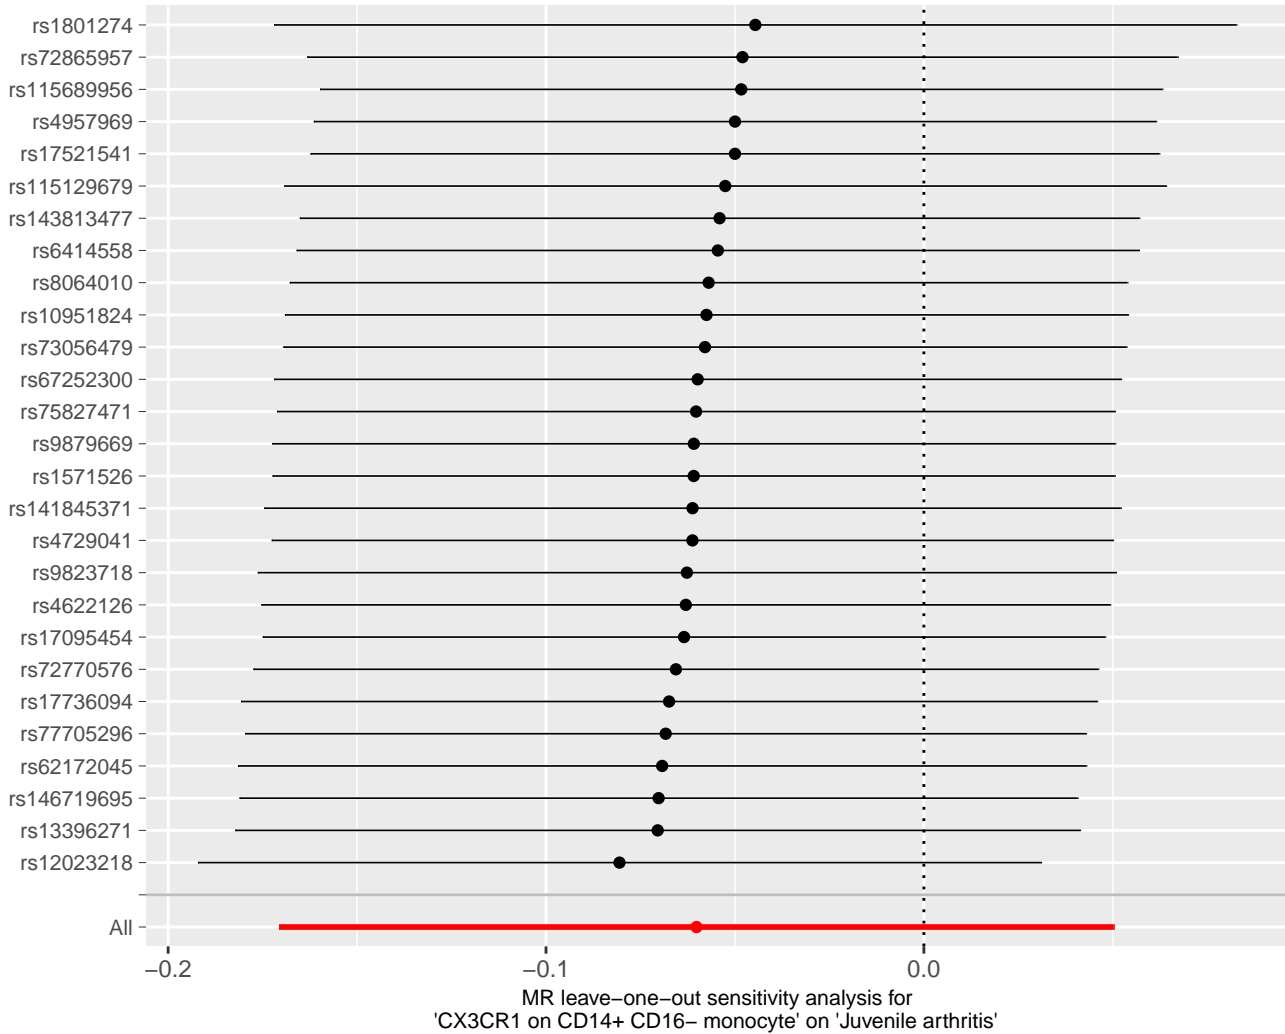

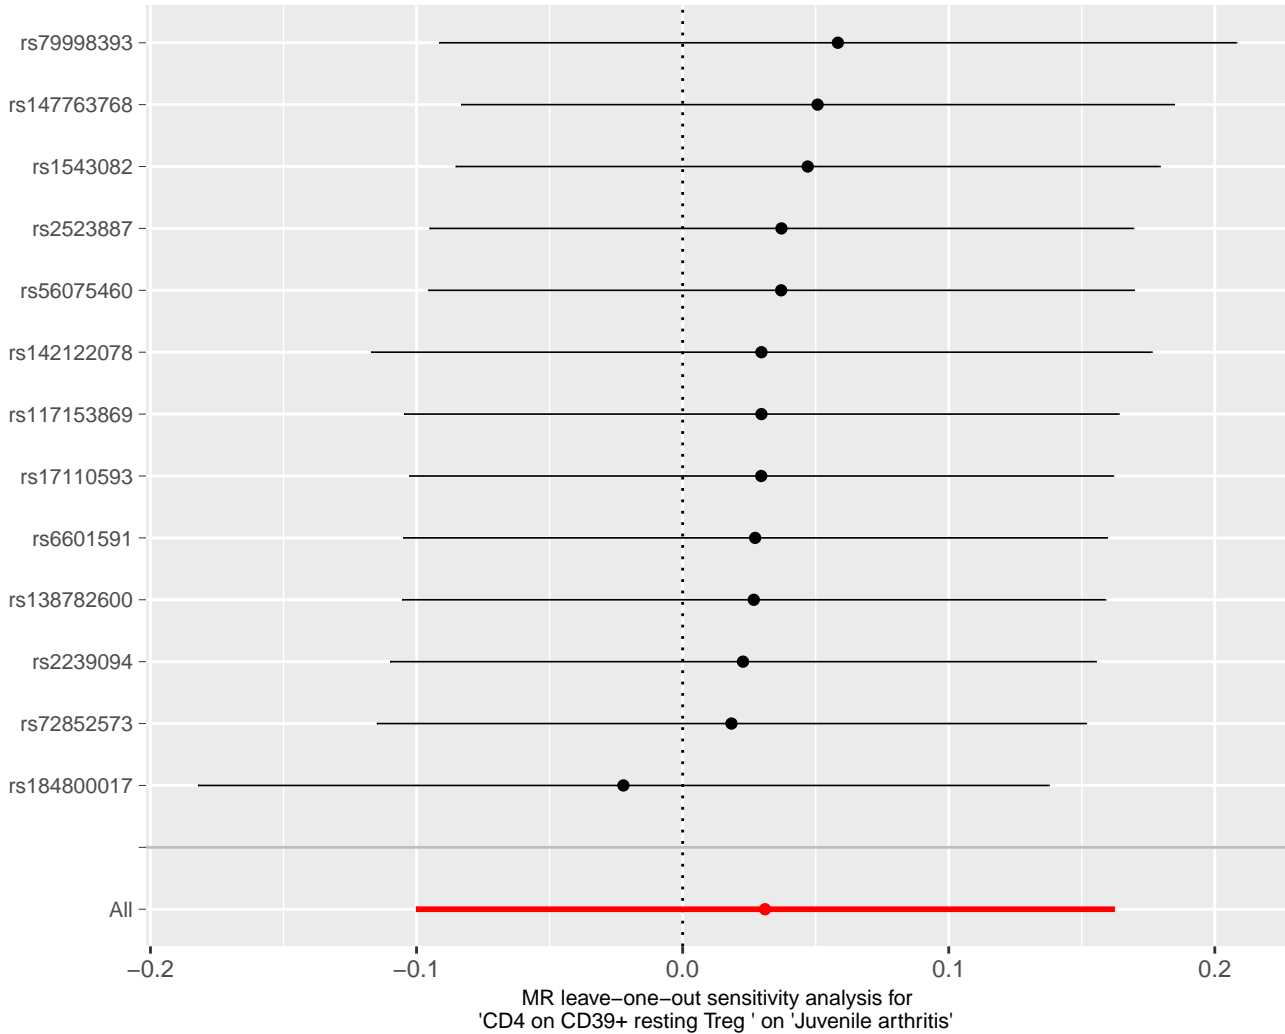

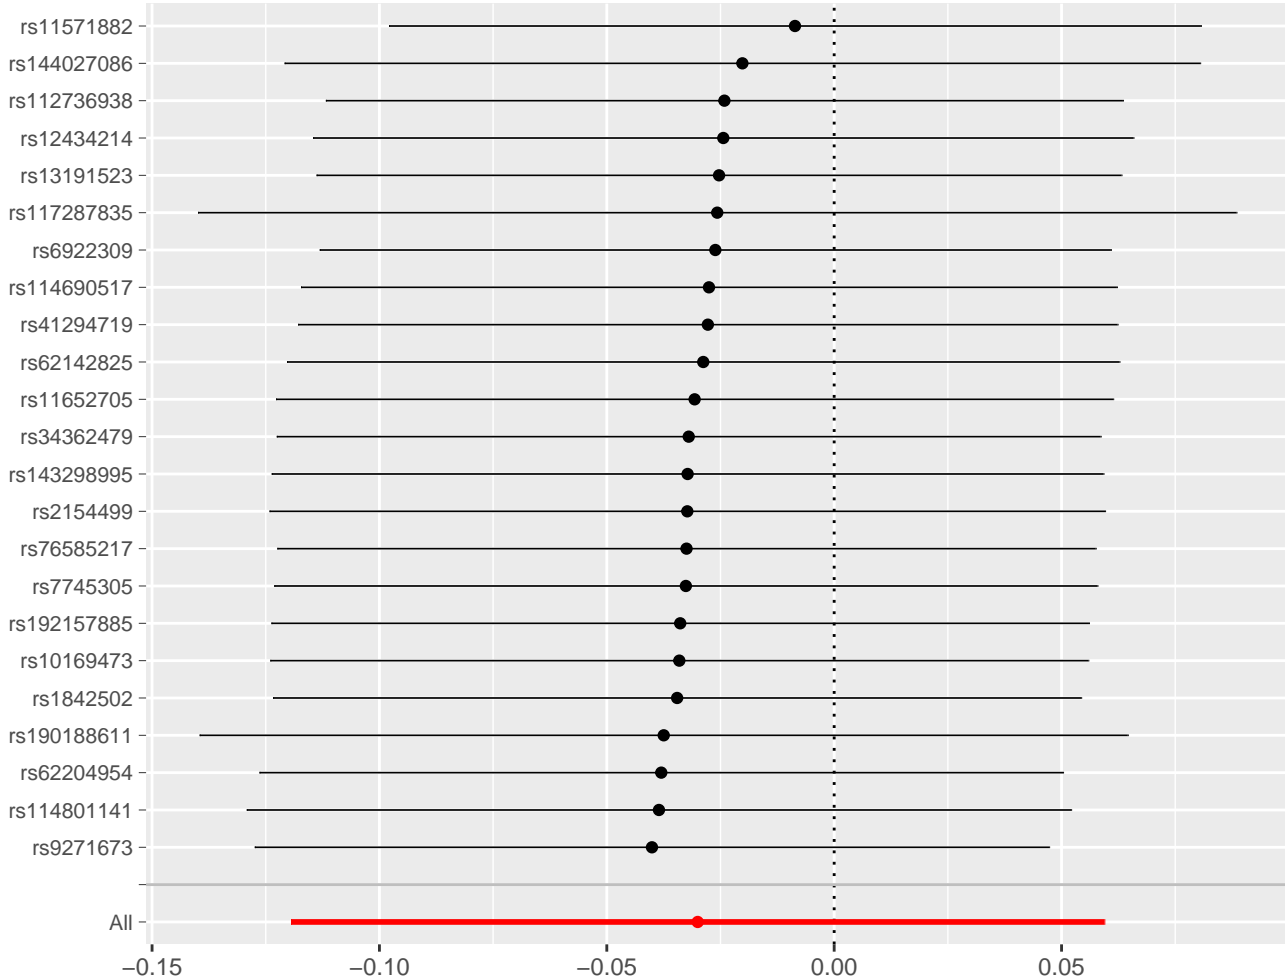

MR leave-one-out sensitivity analysis for 'FSC-A on CD4+' on 'Juvenile arthritis'

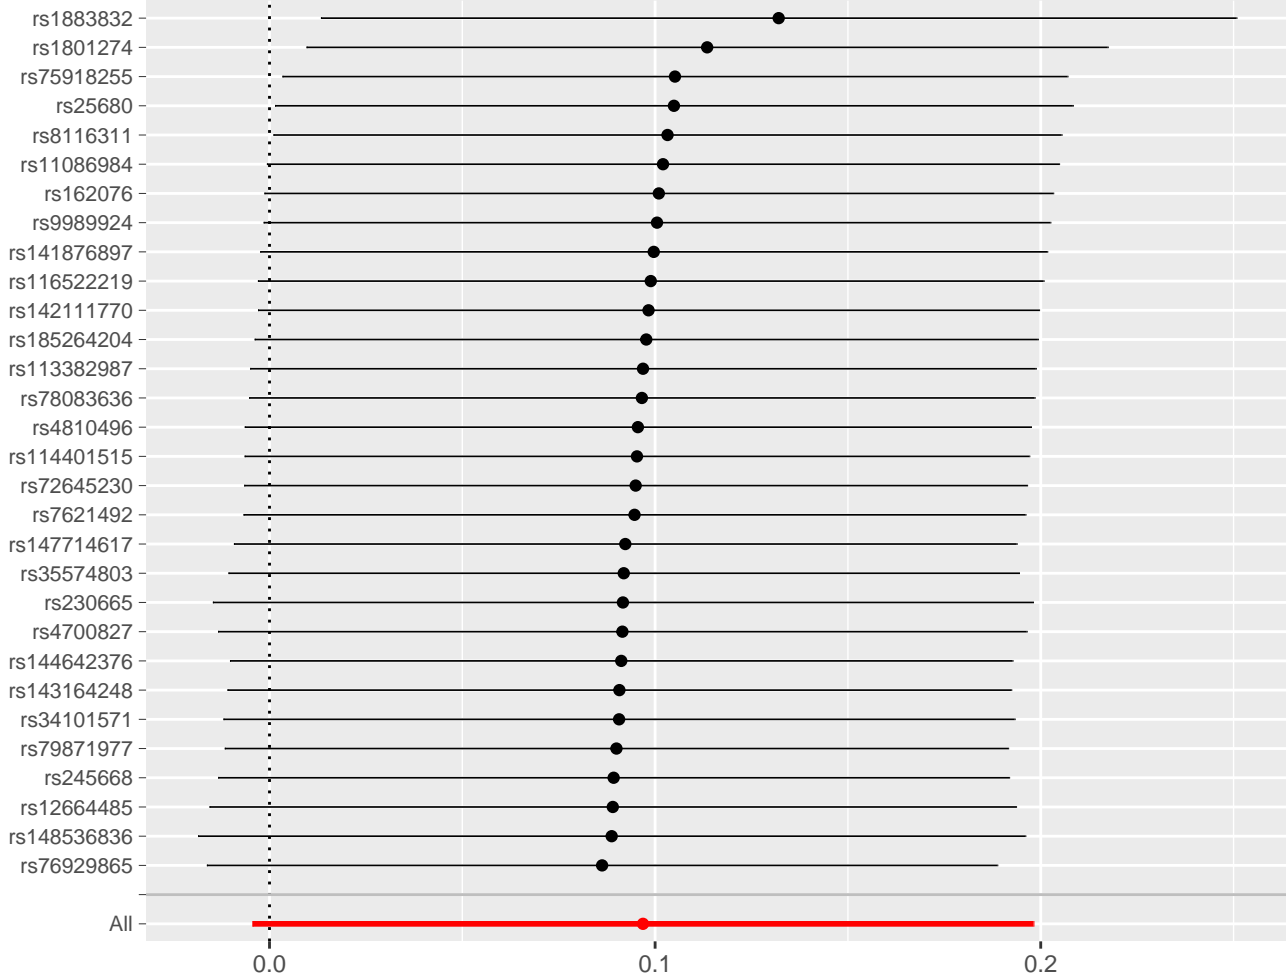

MR leave-one-out sensitivity analysis for 'CD27 on CD24+ CD27+' on 'Juvenile arthritis'

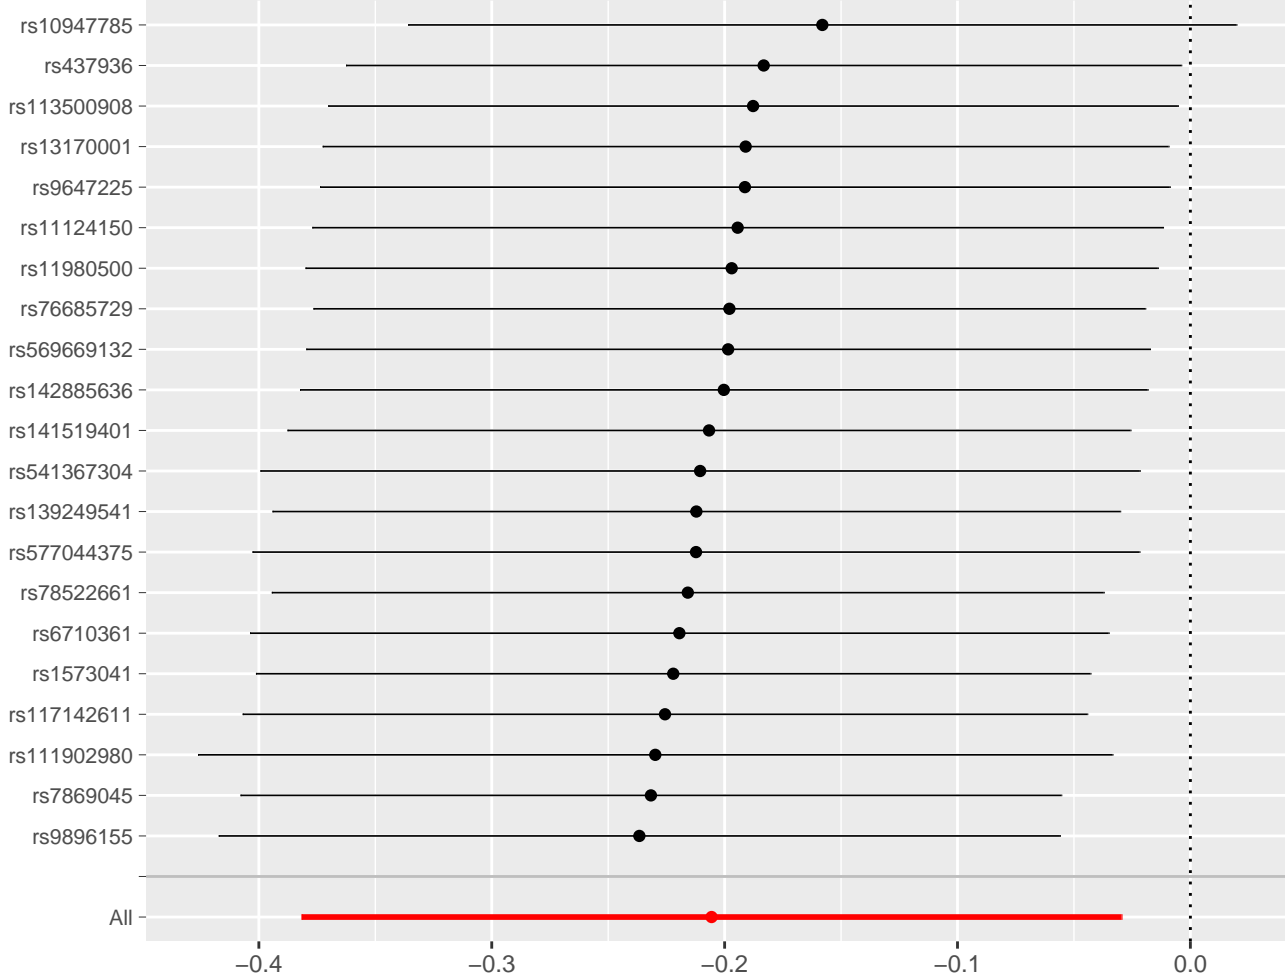

MR leave-one-out sensitivity analysis for 'EM DN (CD4-CD8-) AC' on 'Juvenile arthritis'



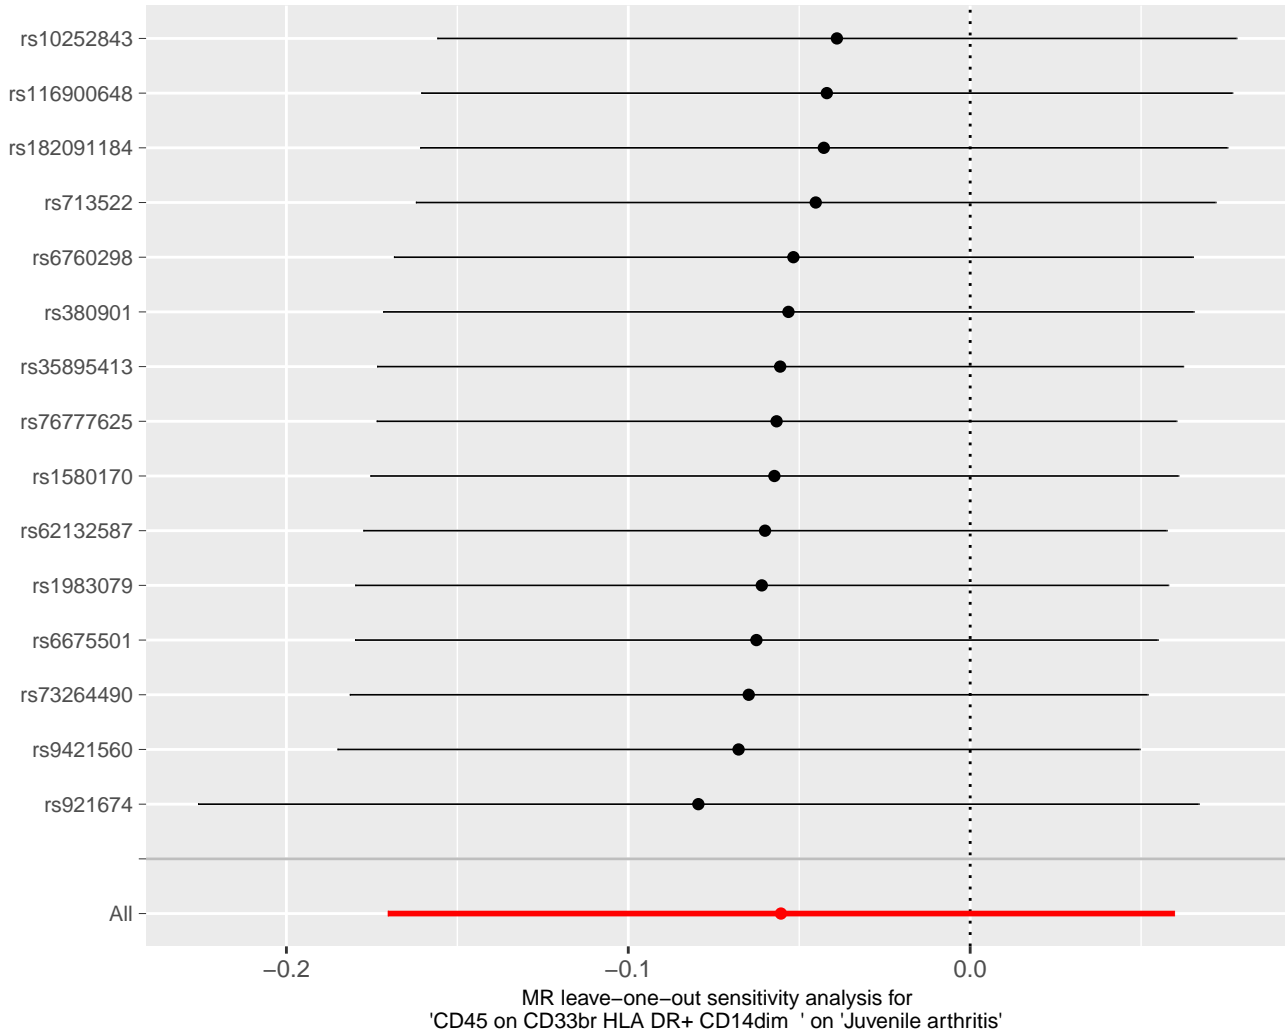

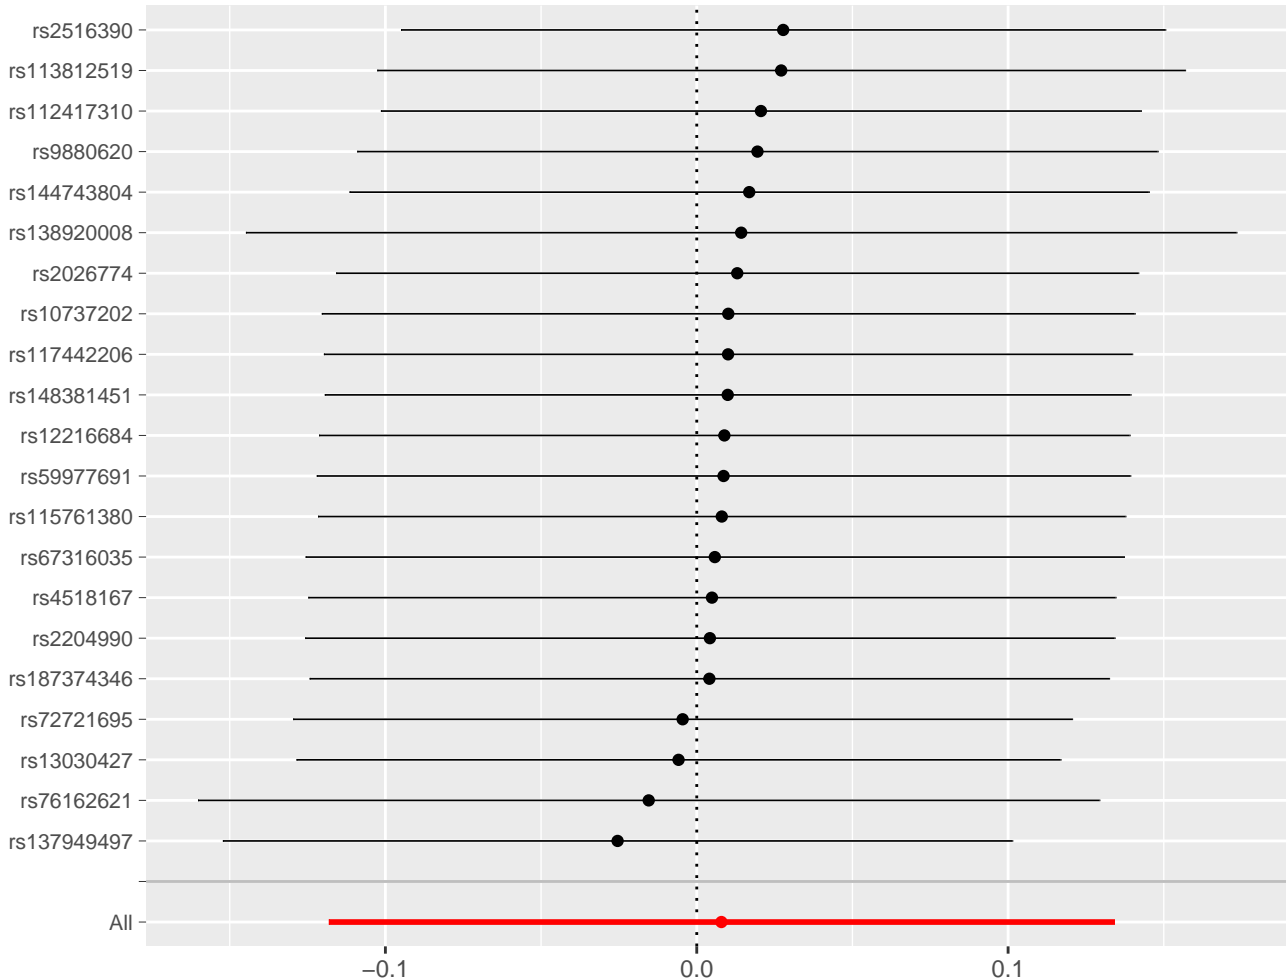

MR leave-one-out sensitivity analysis for 'CD19 on IgD+ CD38br' on 'Juvenile arthritis'

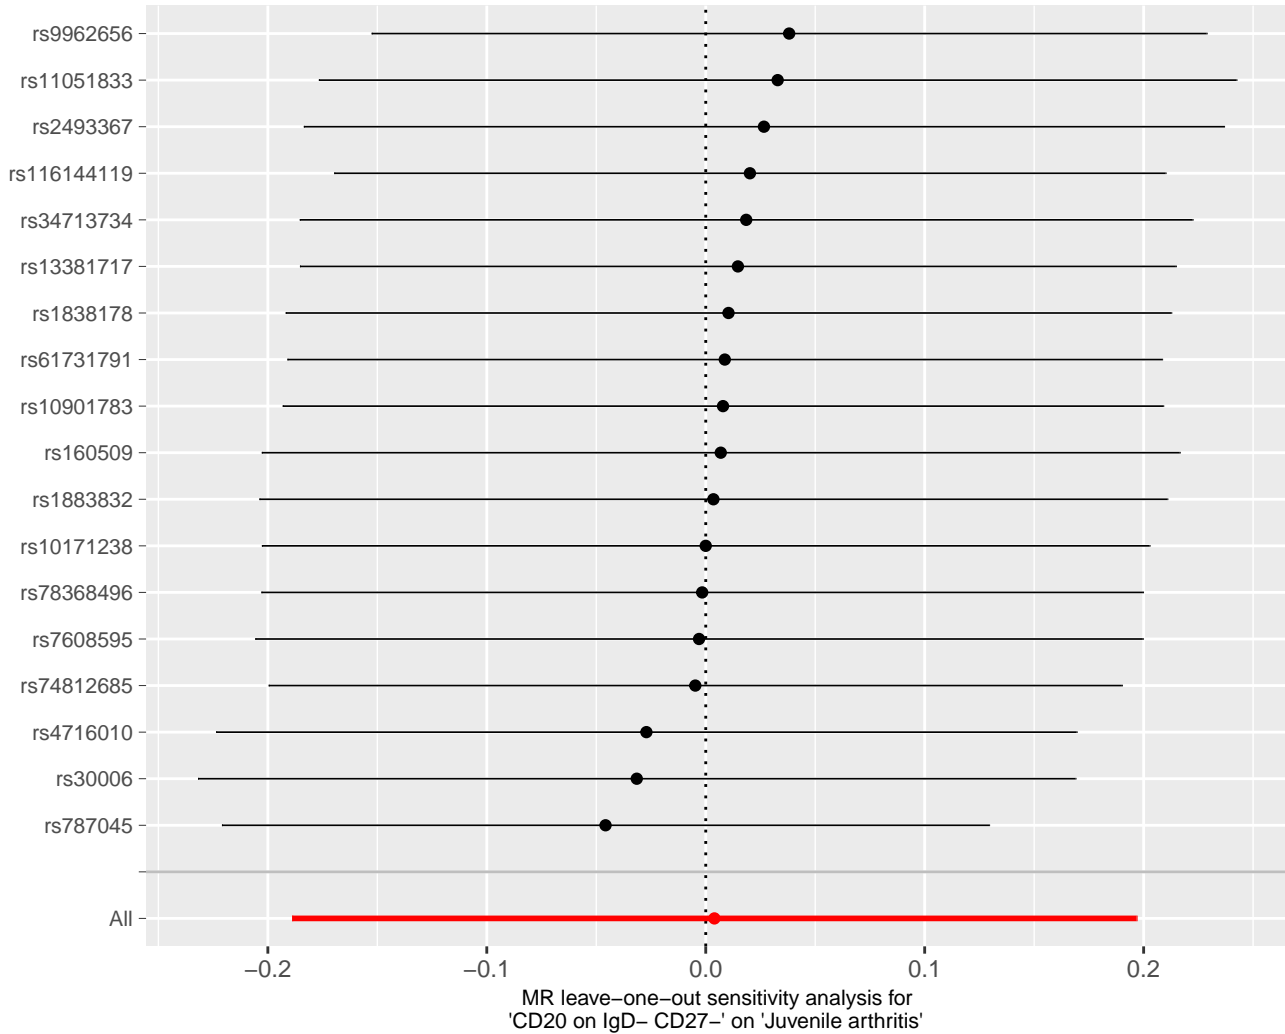

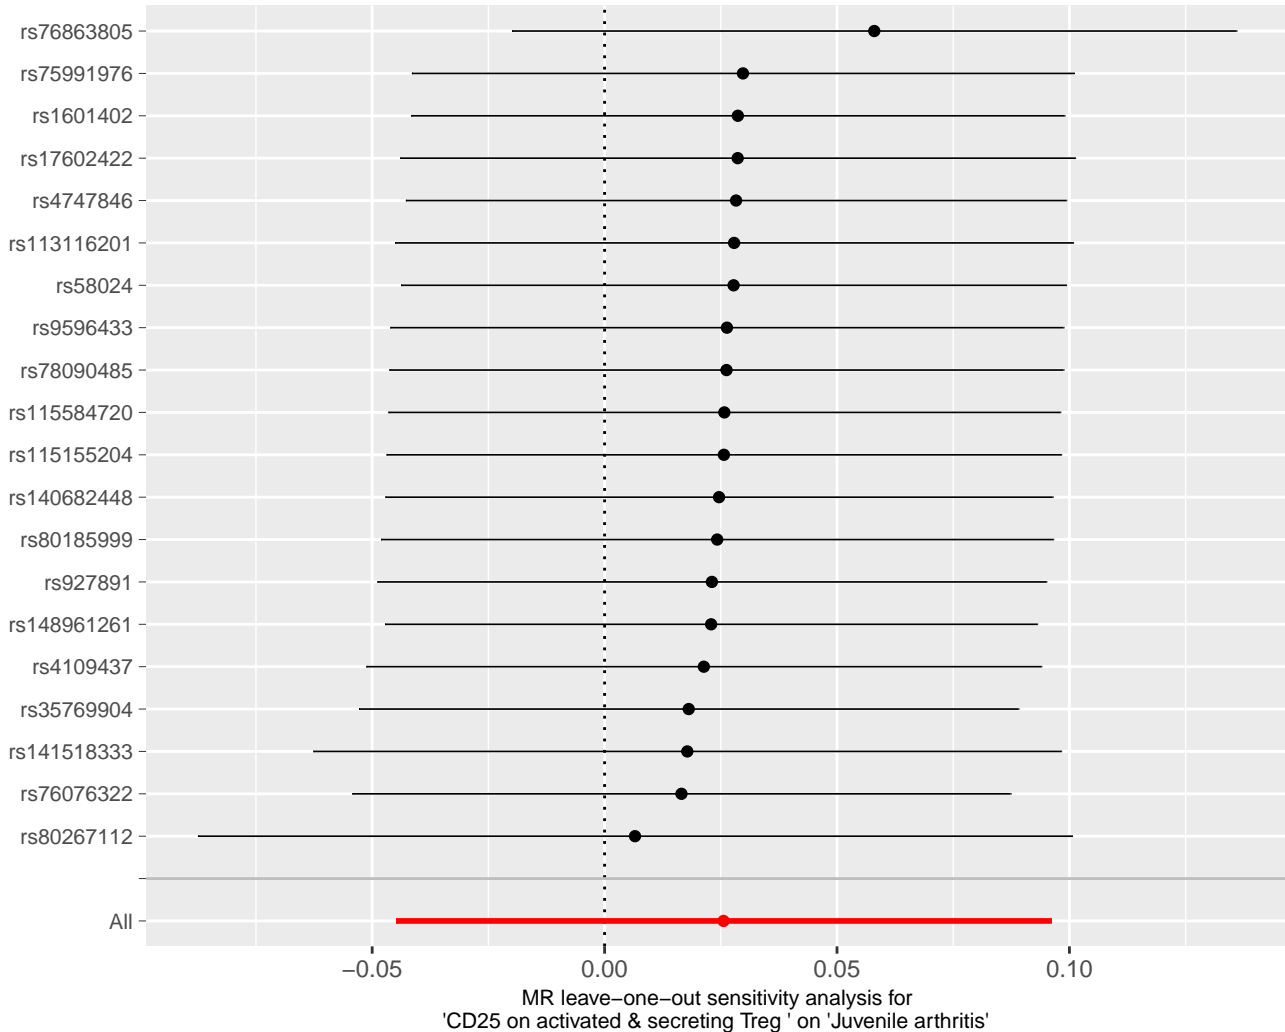

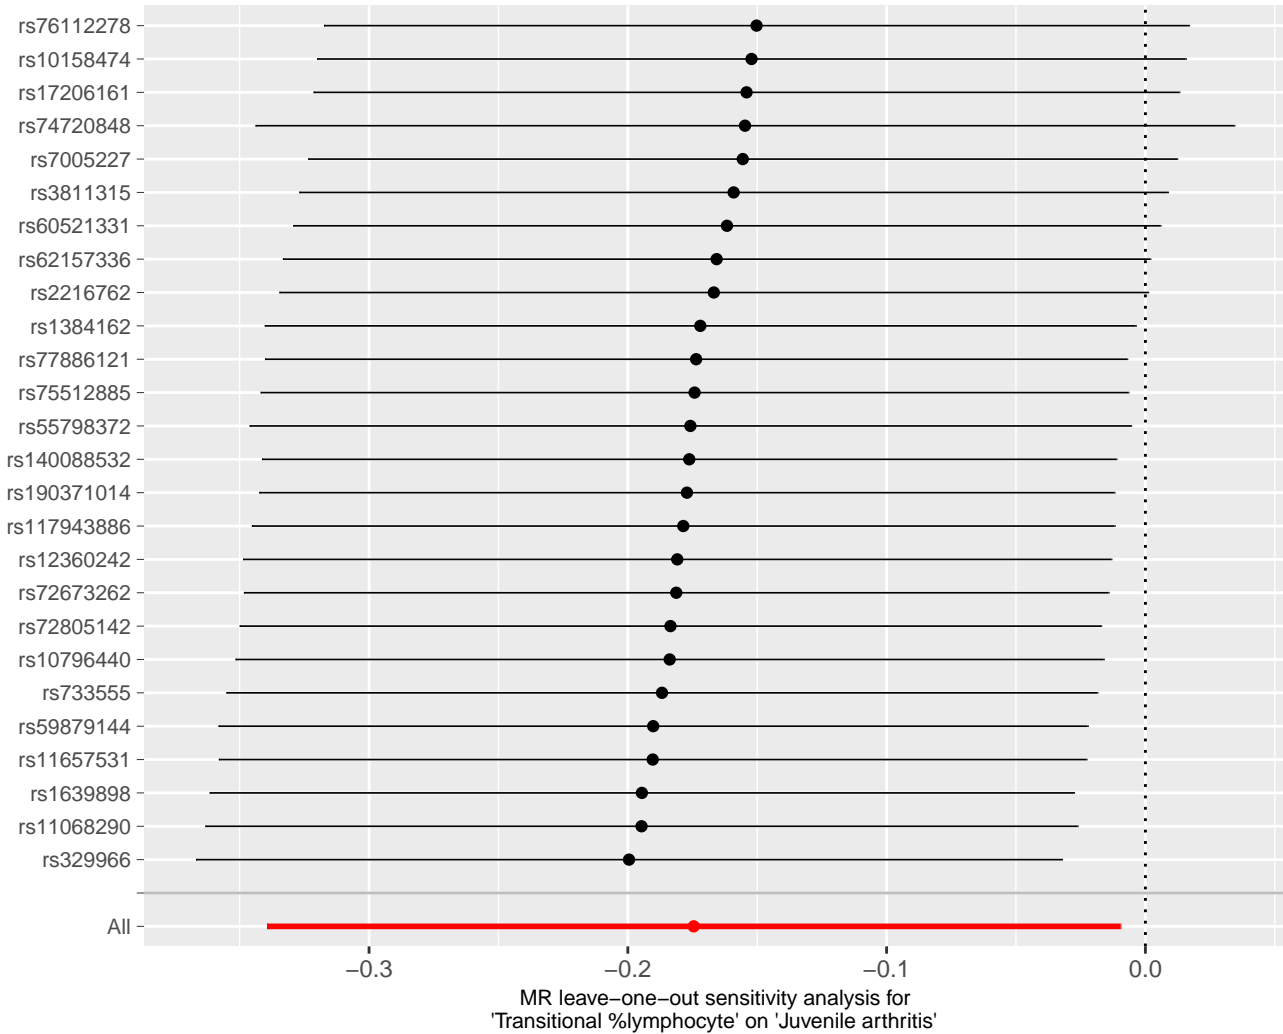

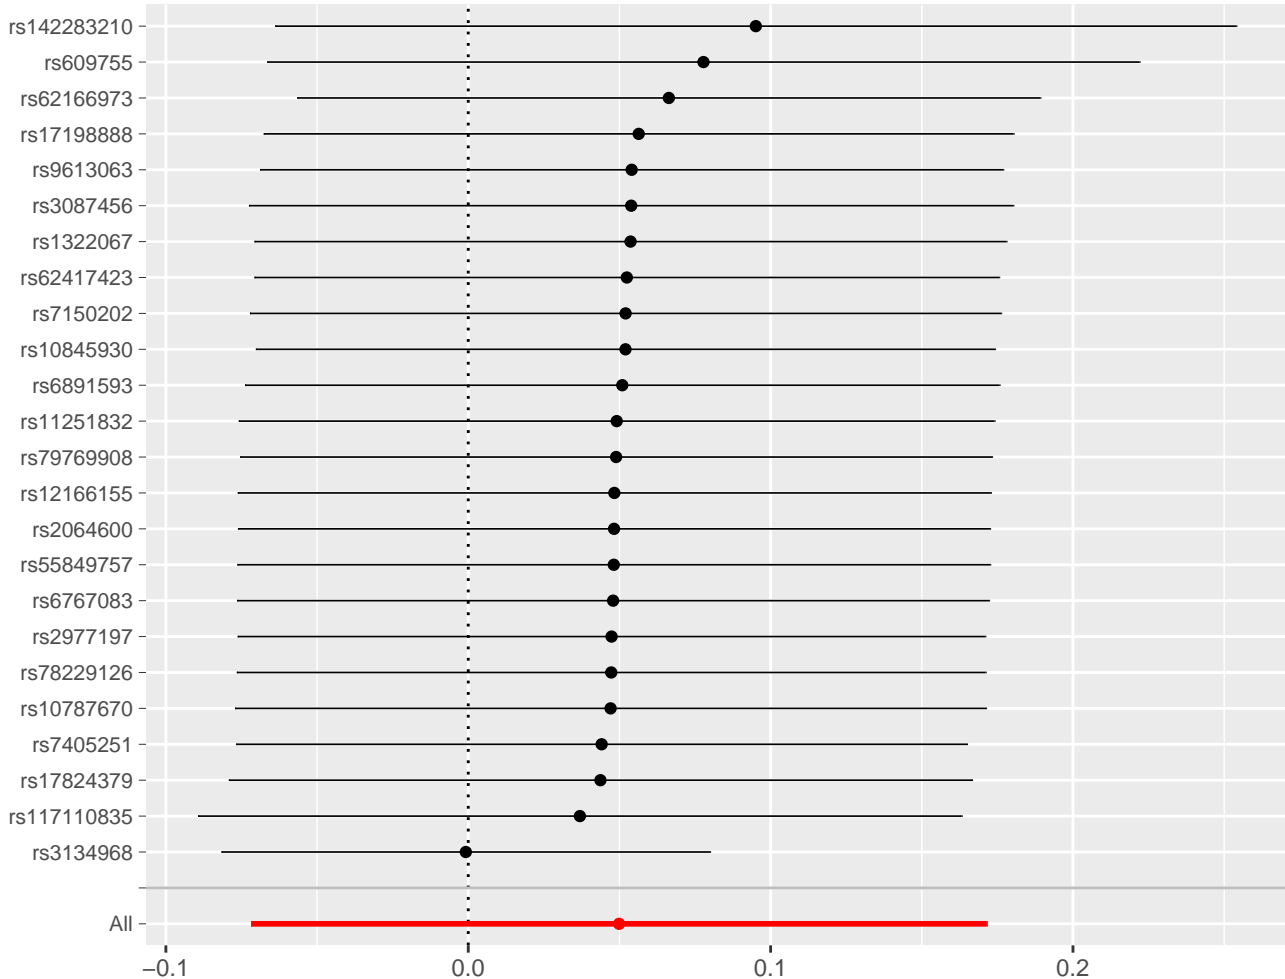

MR leave-one-out sensitivity analysis for 'HLA DR+ CD4+ AC' on 'Juvenile arthritis'

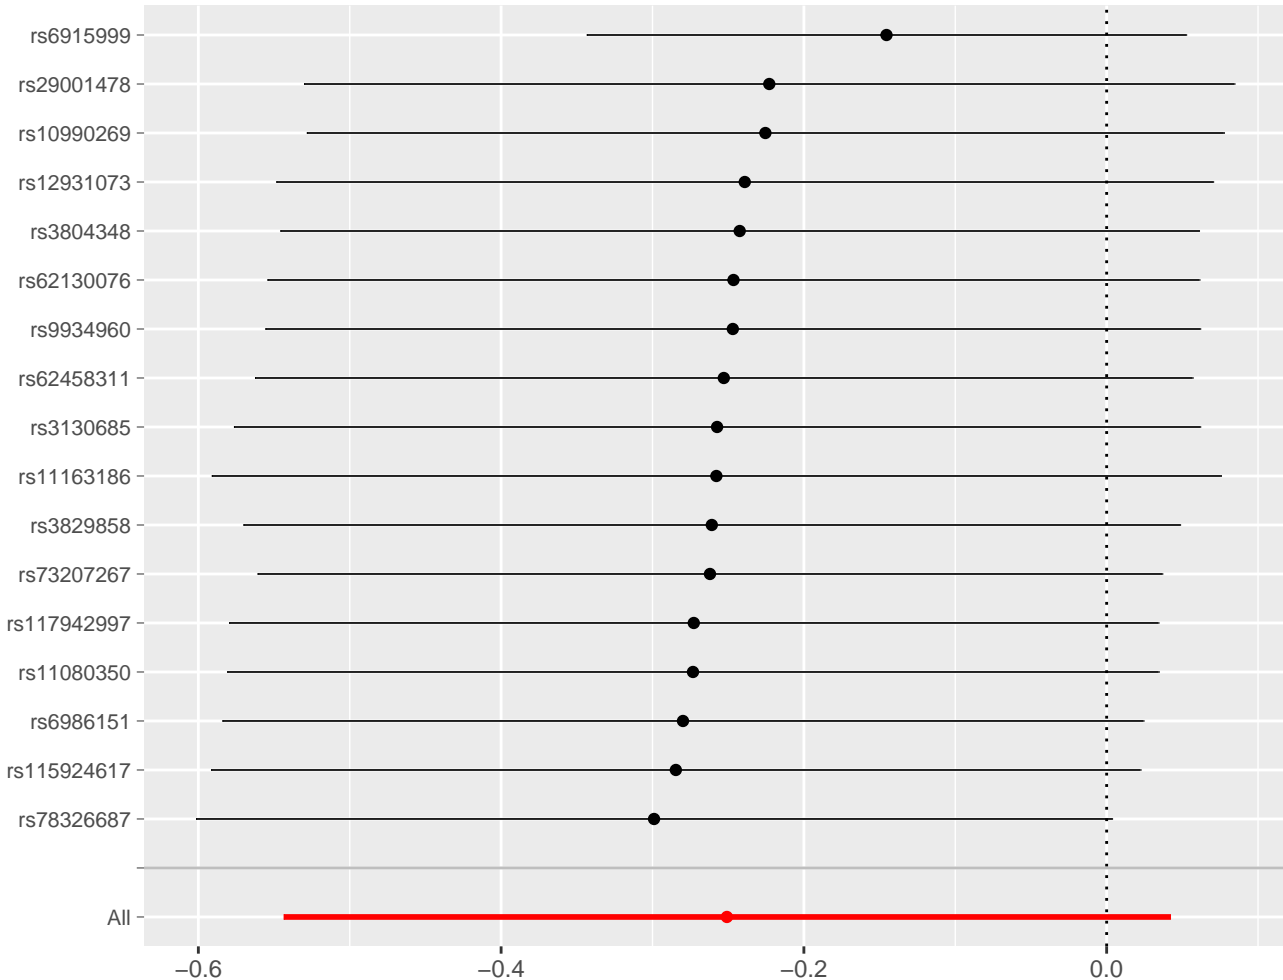

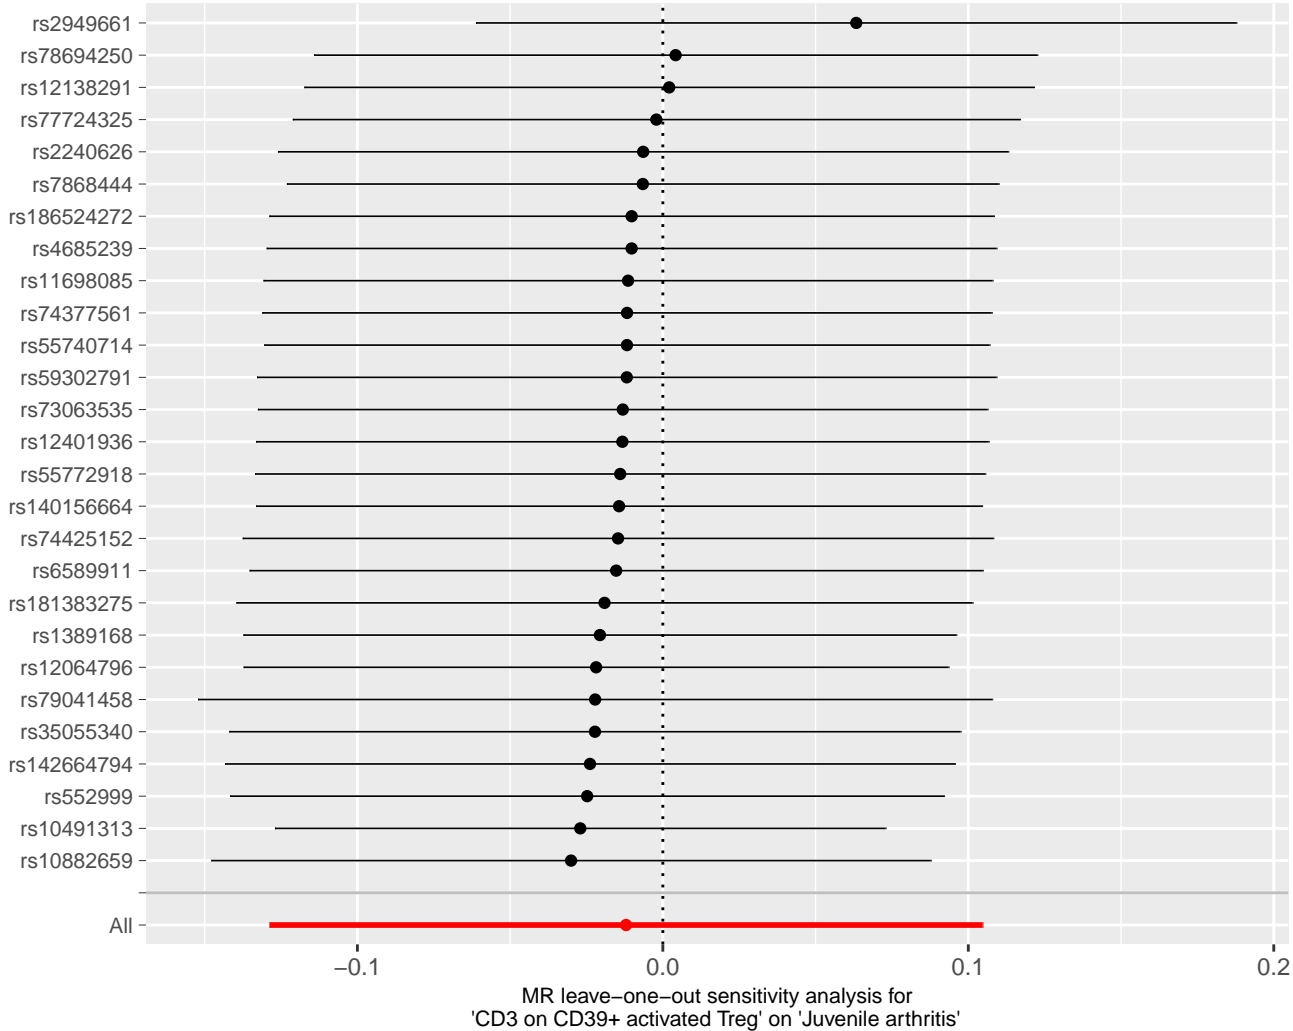



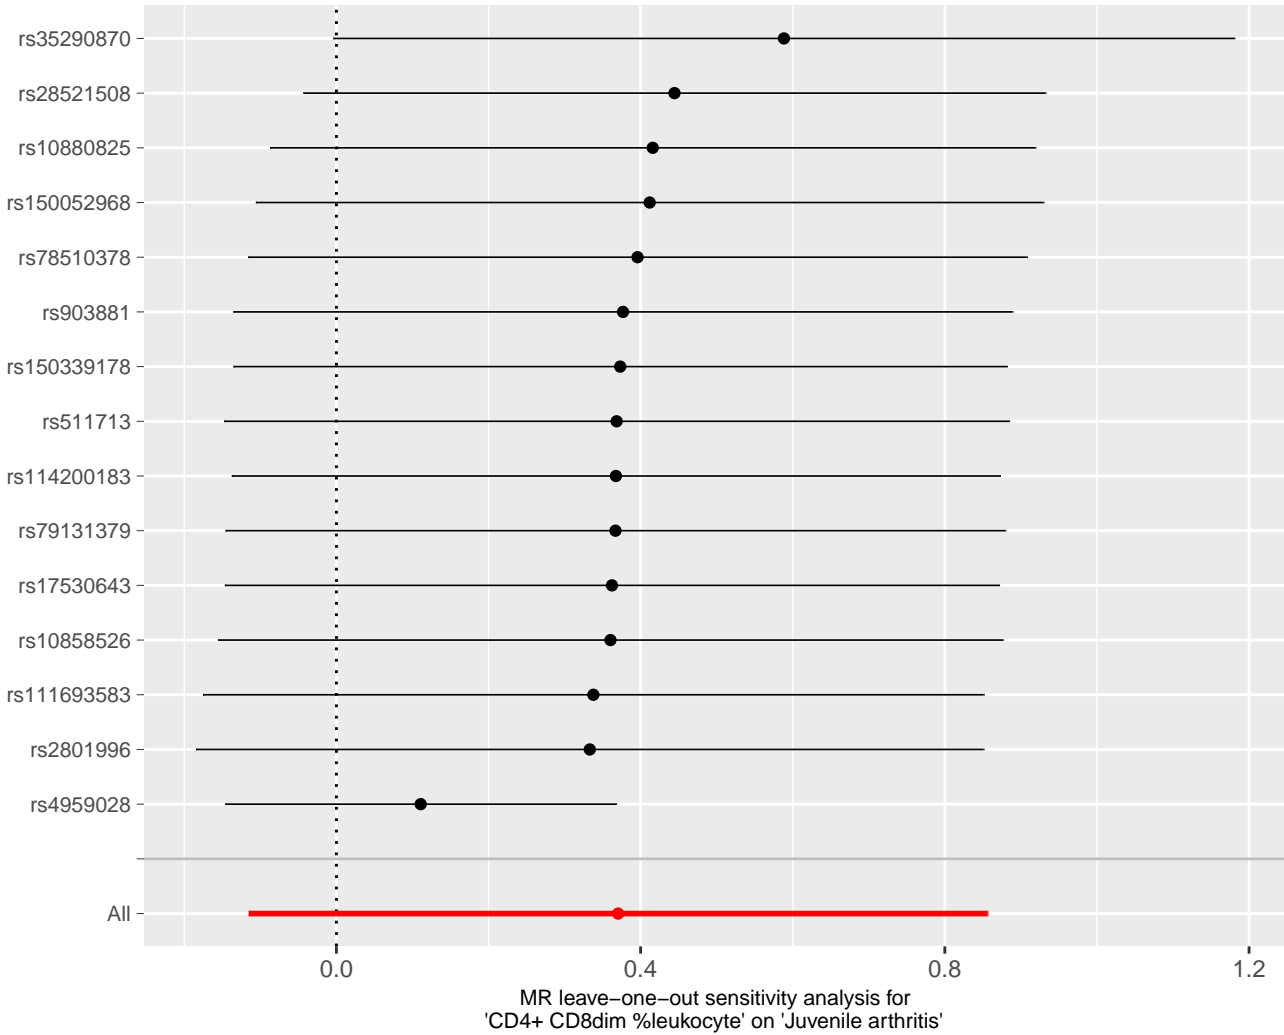

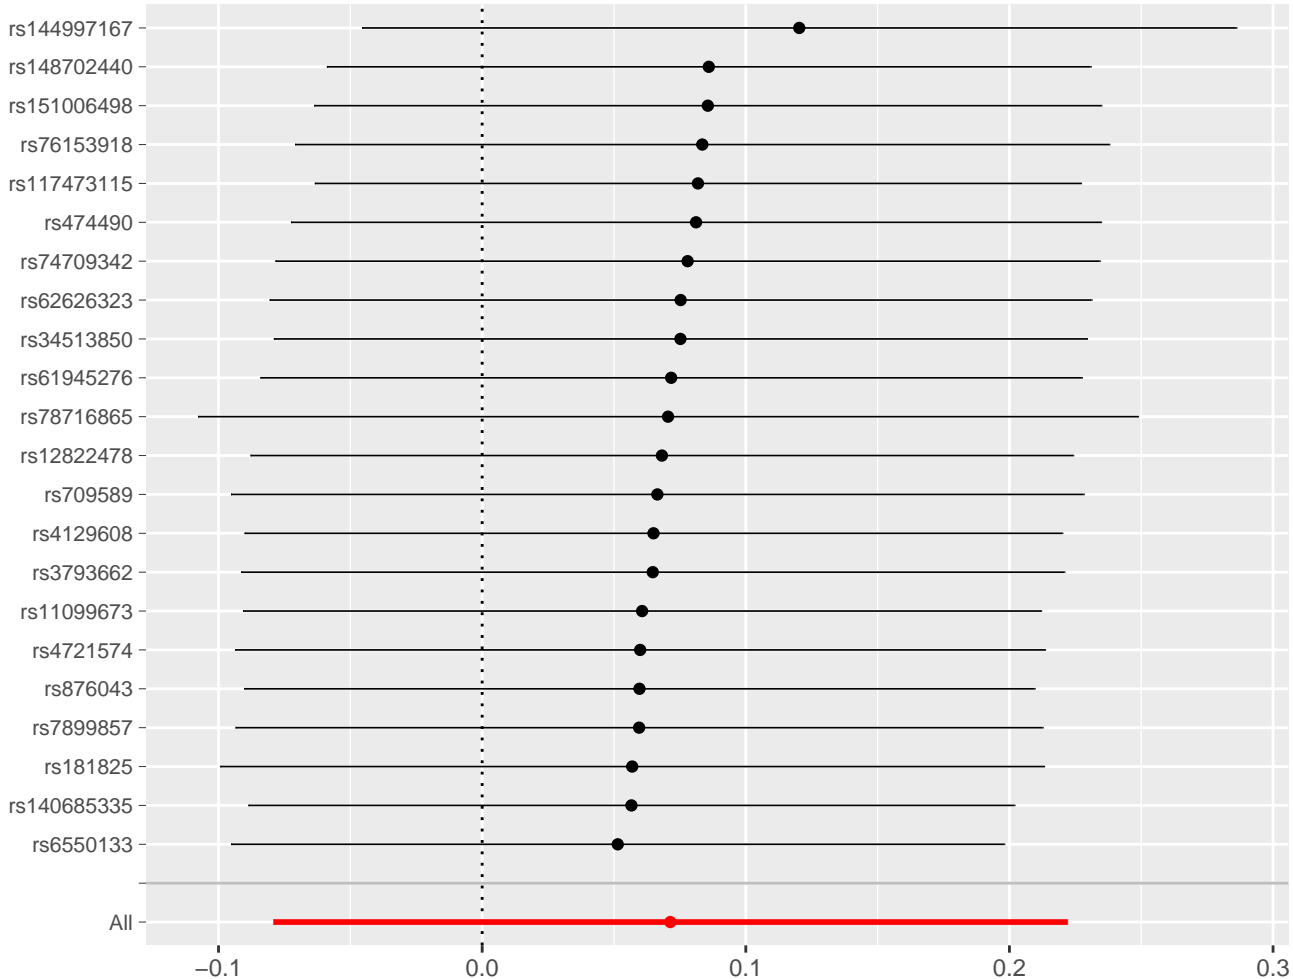

MR leave-one-out sensitivity analysis for 'CD25 on transitional' on 'Juvenile arthritis'

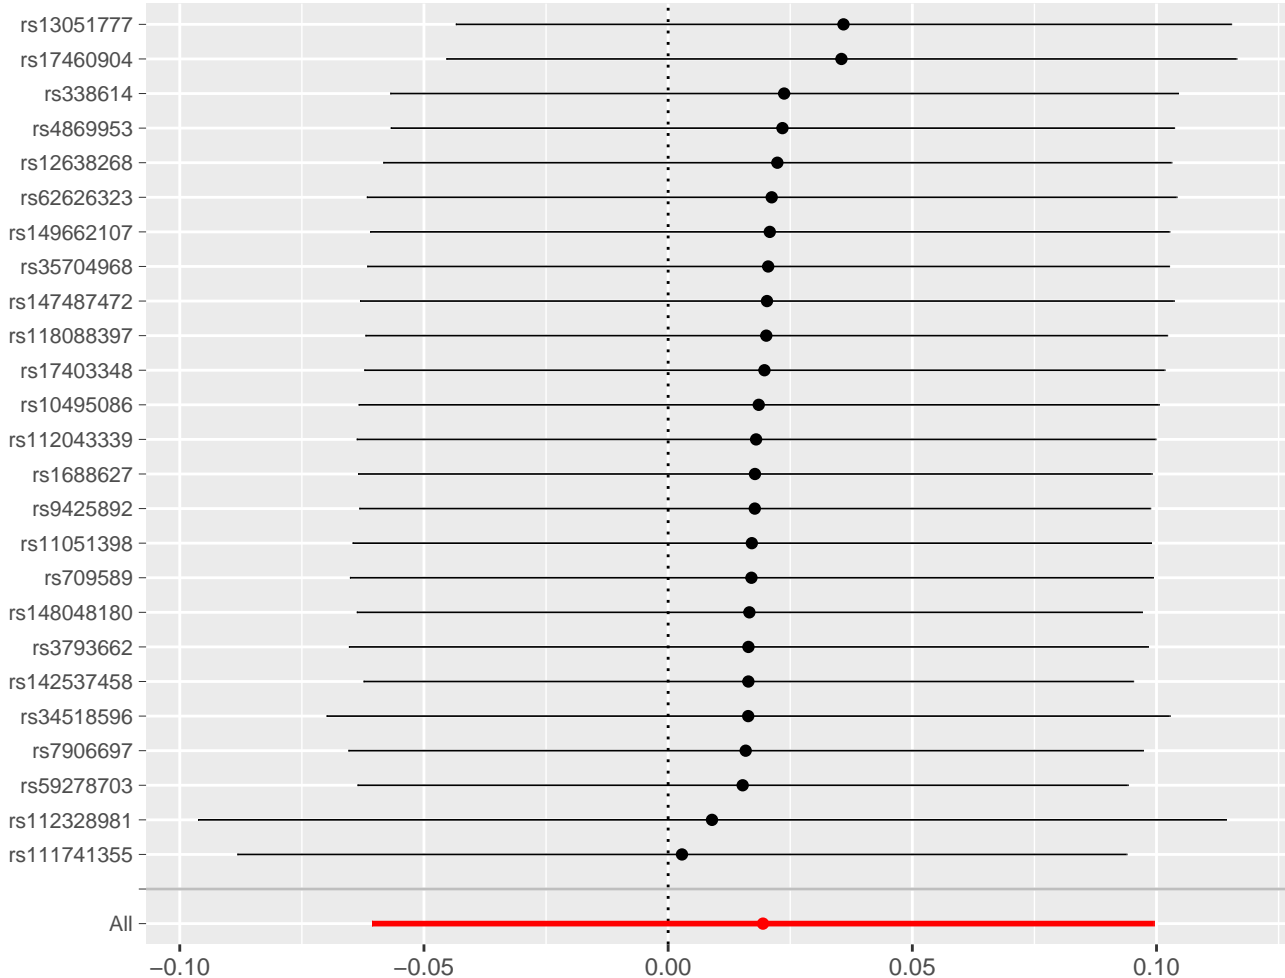

MR leave-one-out sensitivity analysis for 'CD25 on IgD+ CD24-' on 'Juvenile arthritis'

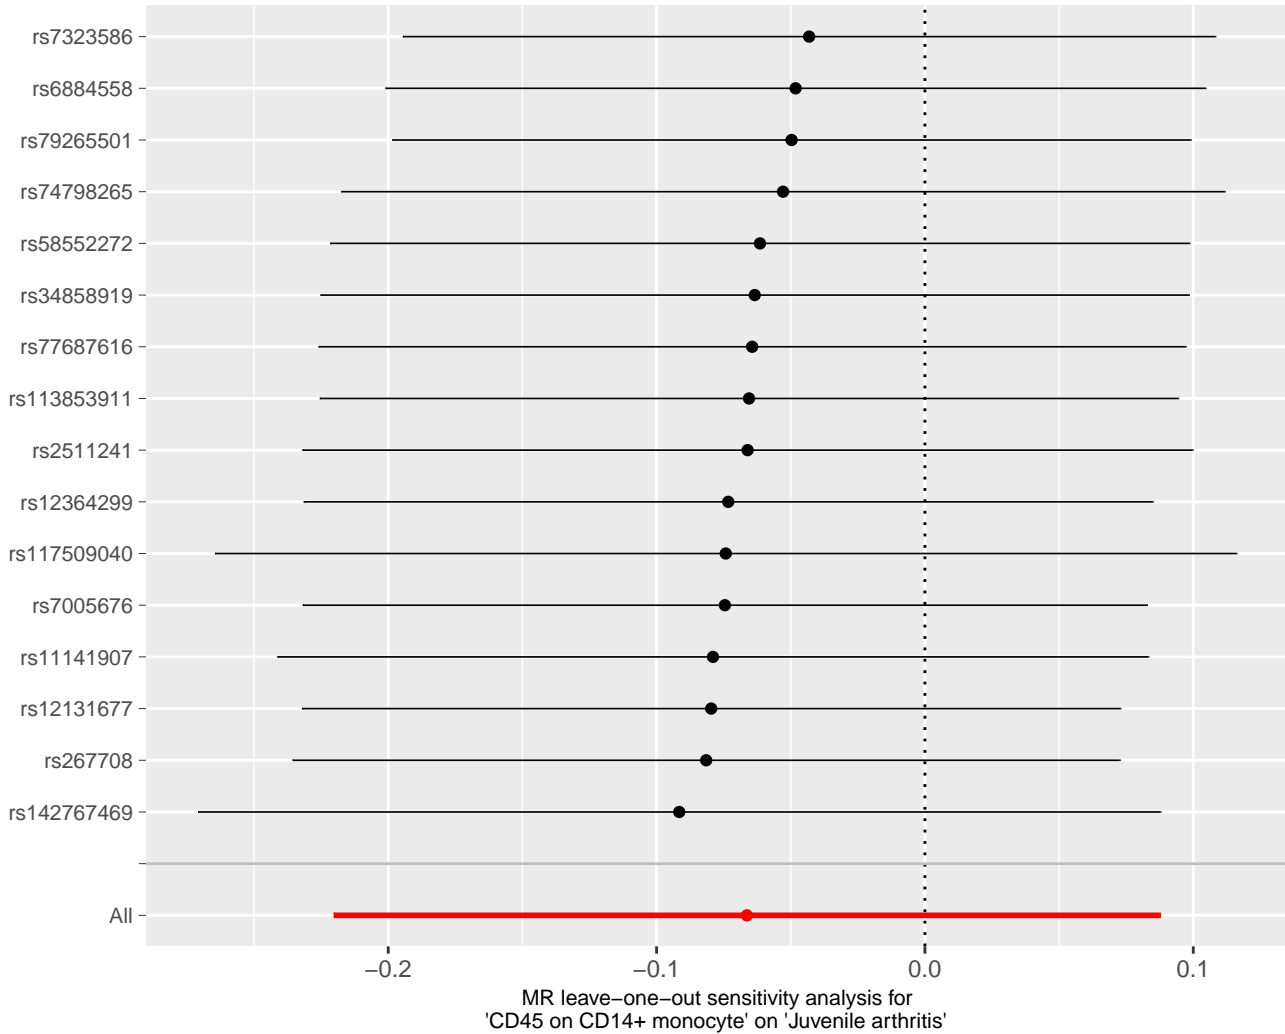

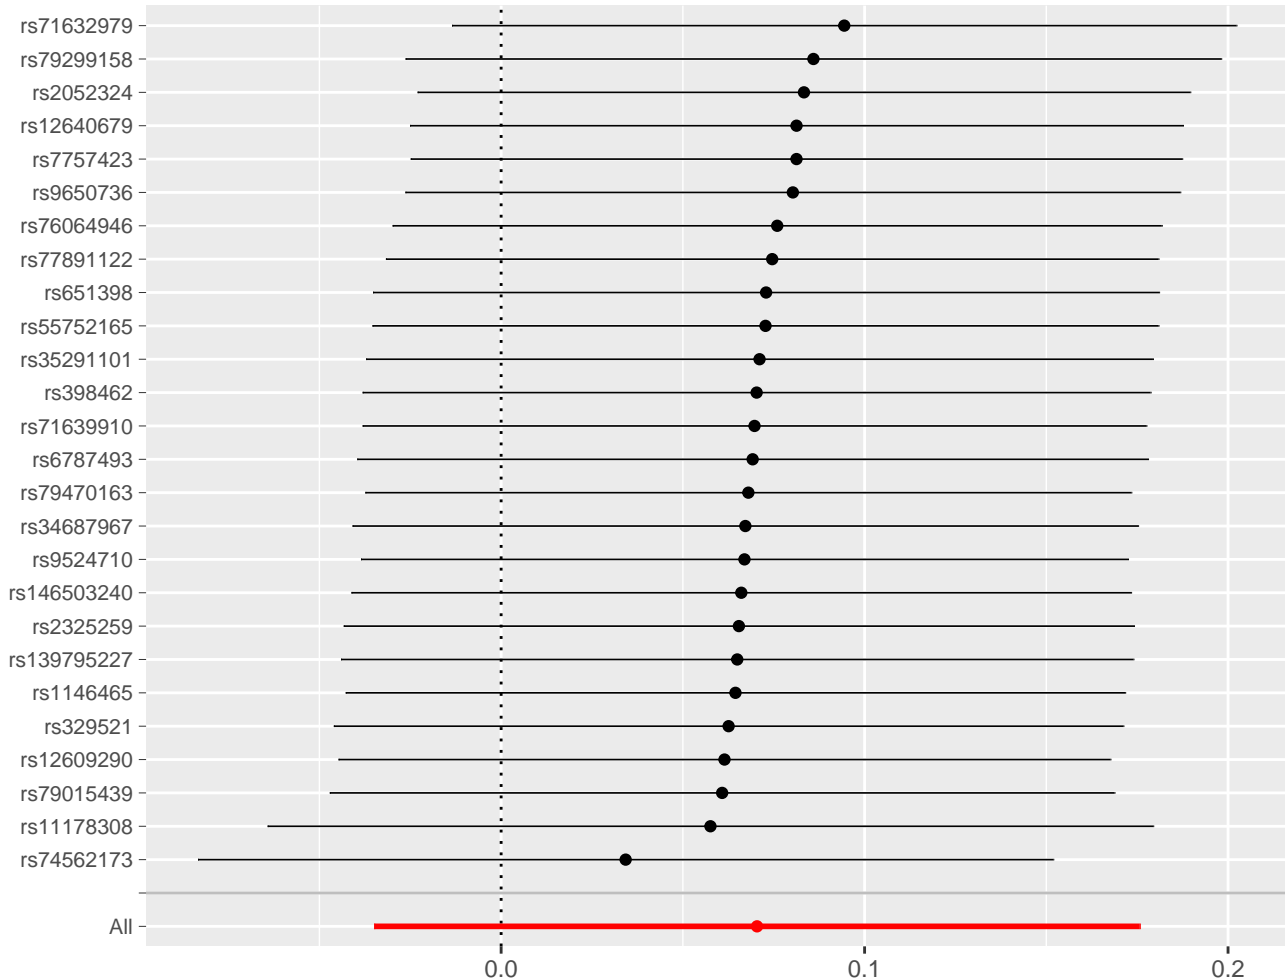

MR leave-one-out sensitivity analysis for 'CD80 on myeloid DC' on 'Juvenile arthritis'

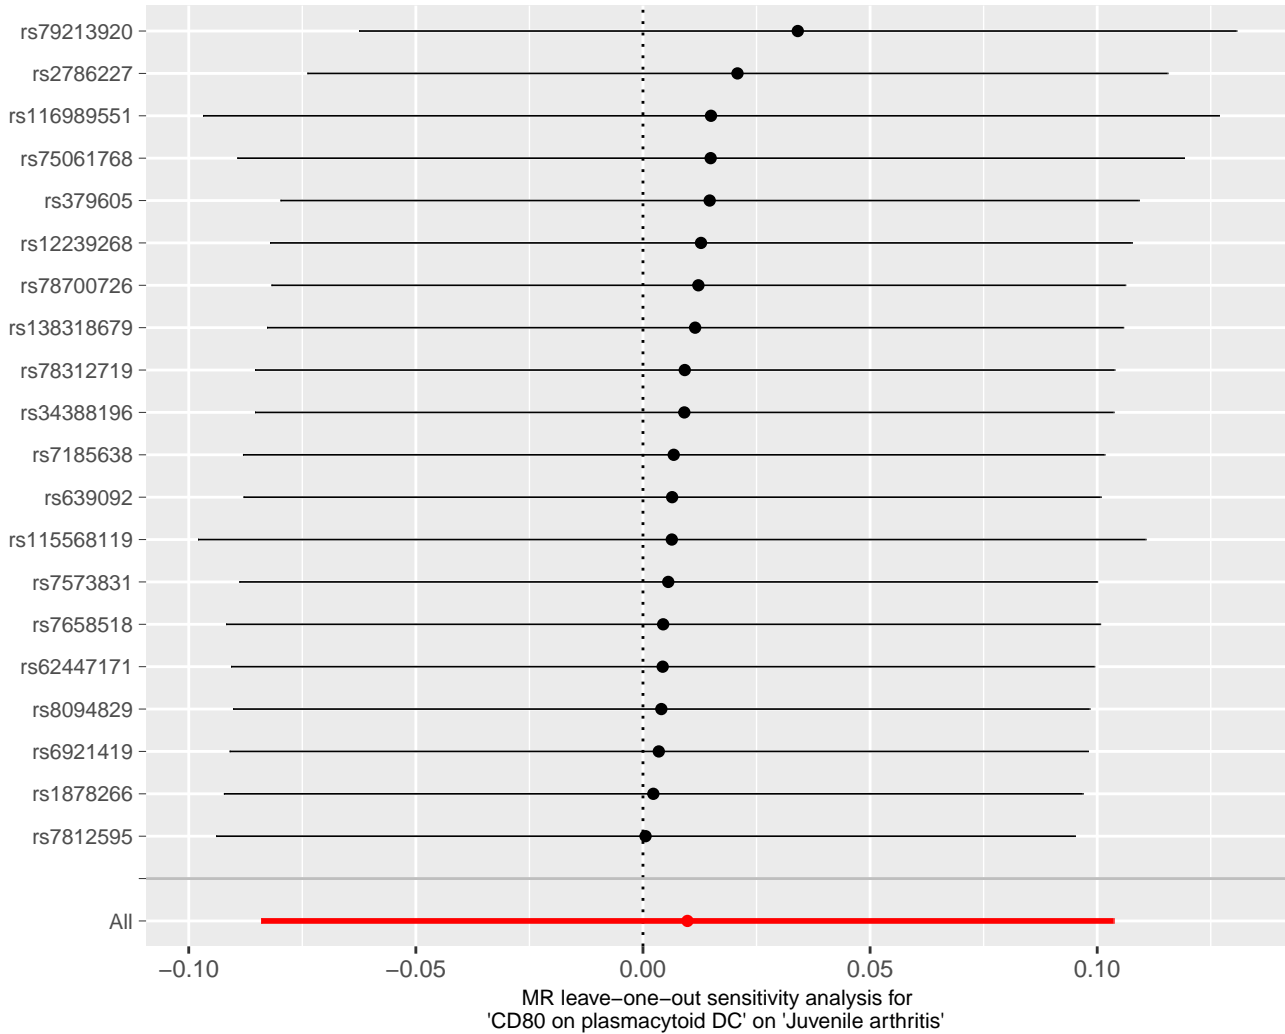

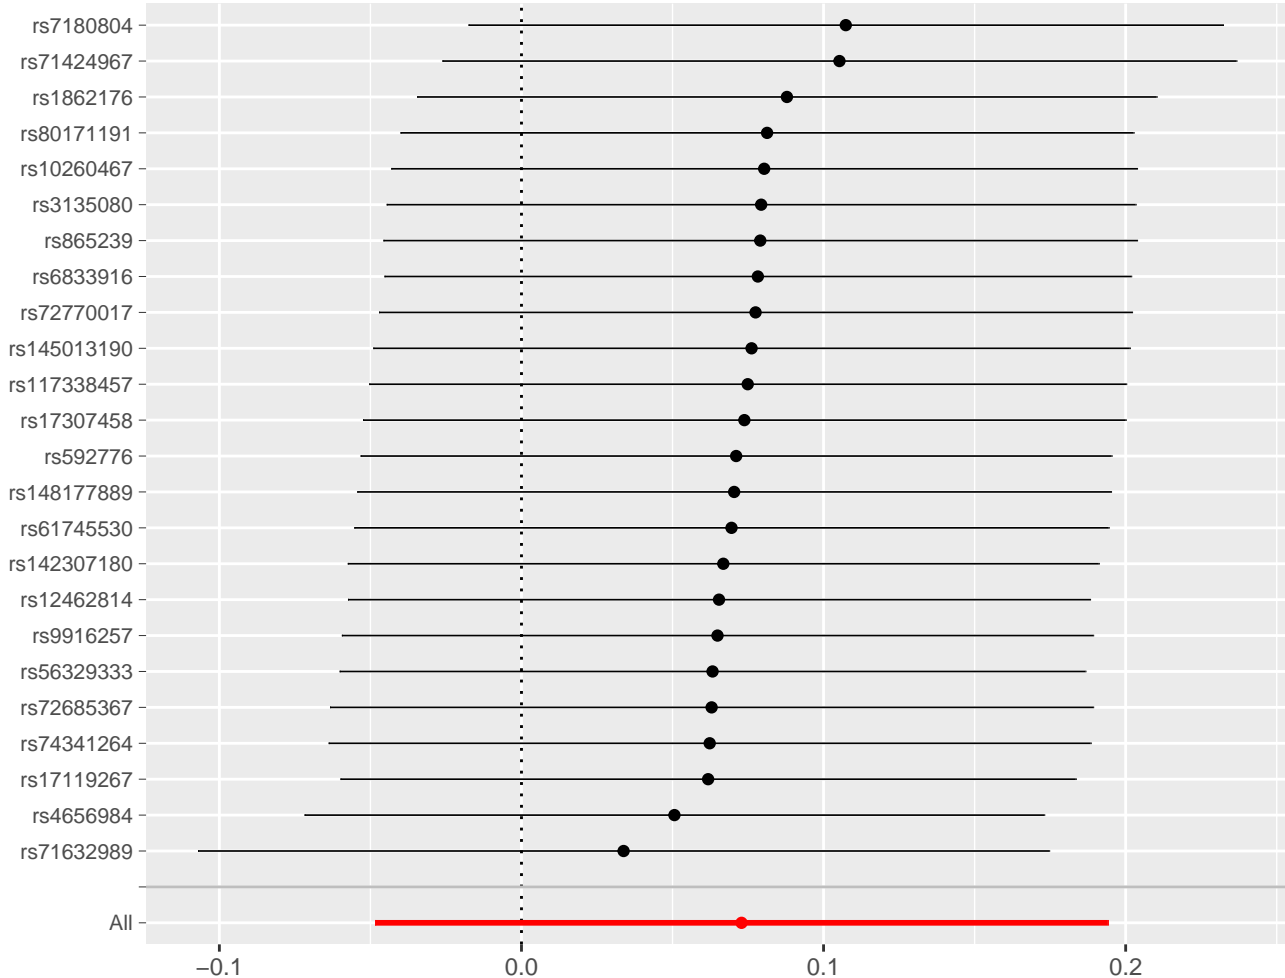

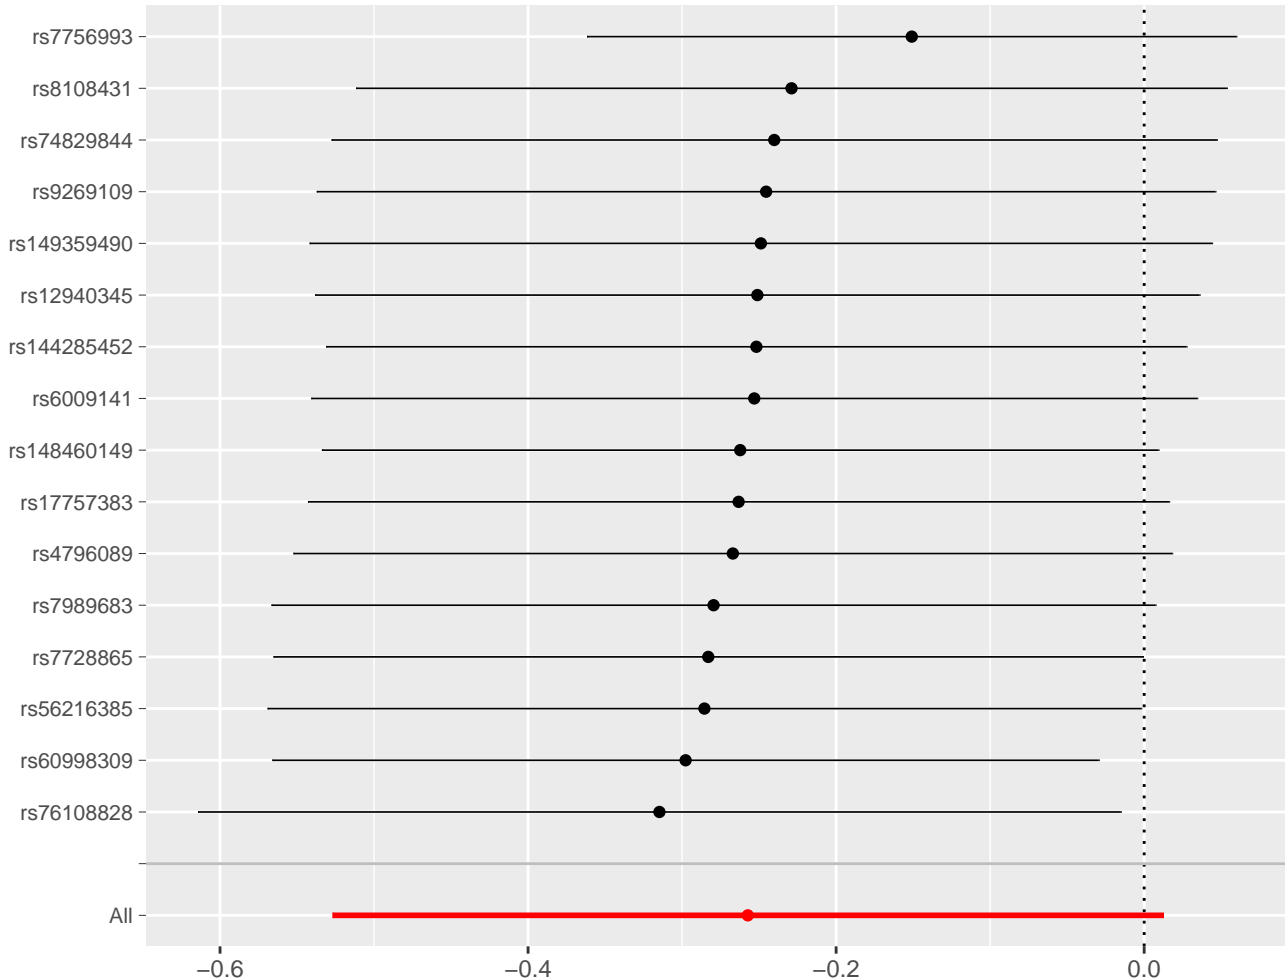

MR leave-one-out sensitivity analysis for 'CD28- CD8br %T cell' on 'Juvenile arthritis'



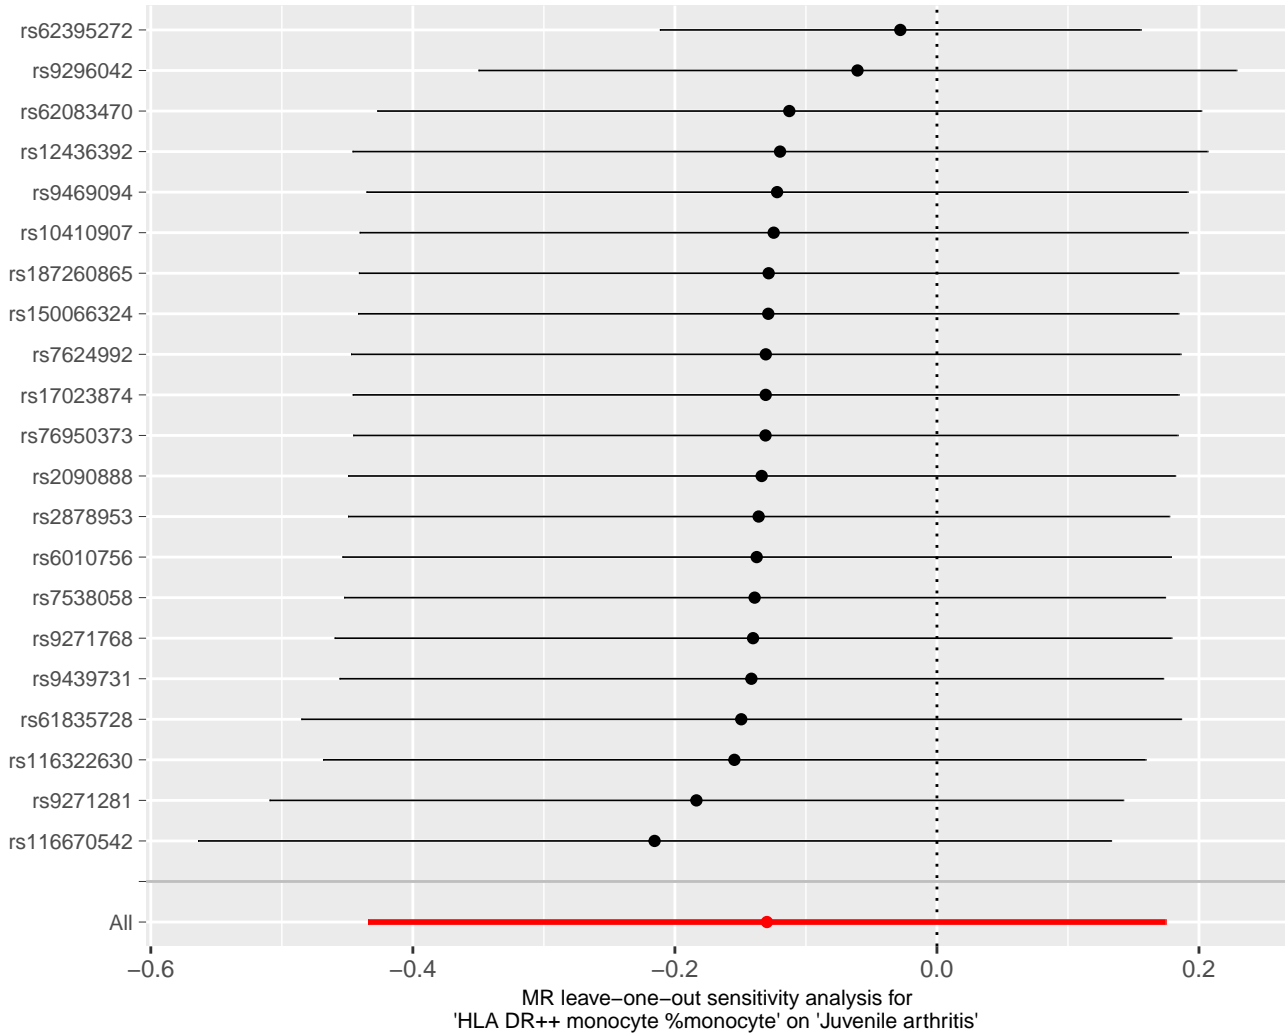

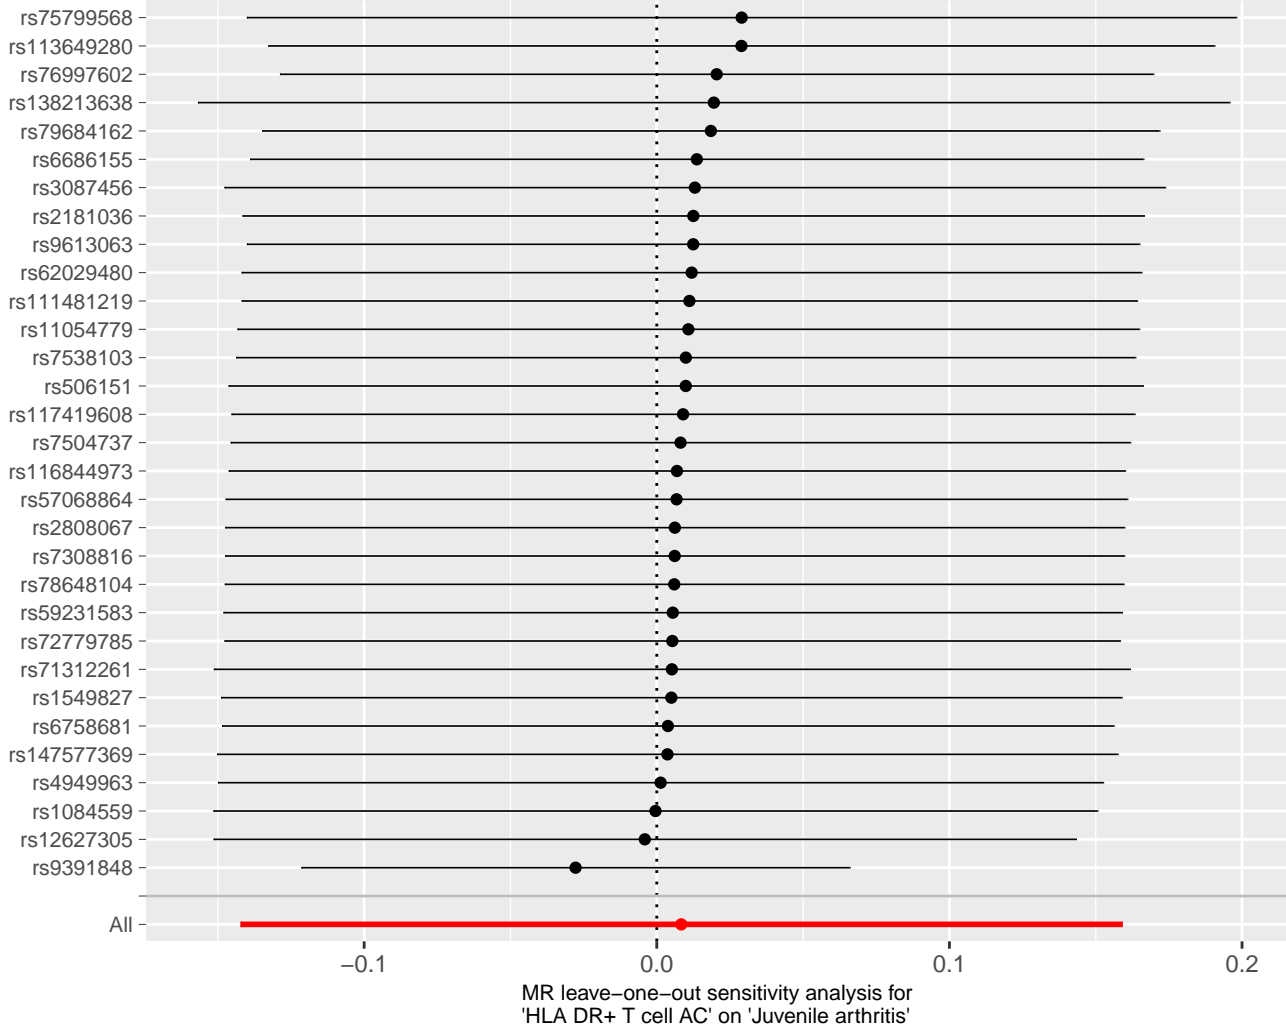

MR leave-one-out sensitivity analysis for 'HLA DR+ T cell AC' on 'Juvenile arthritis'

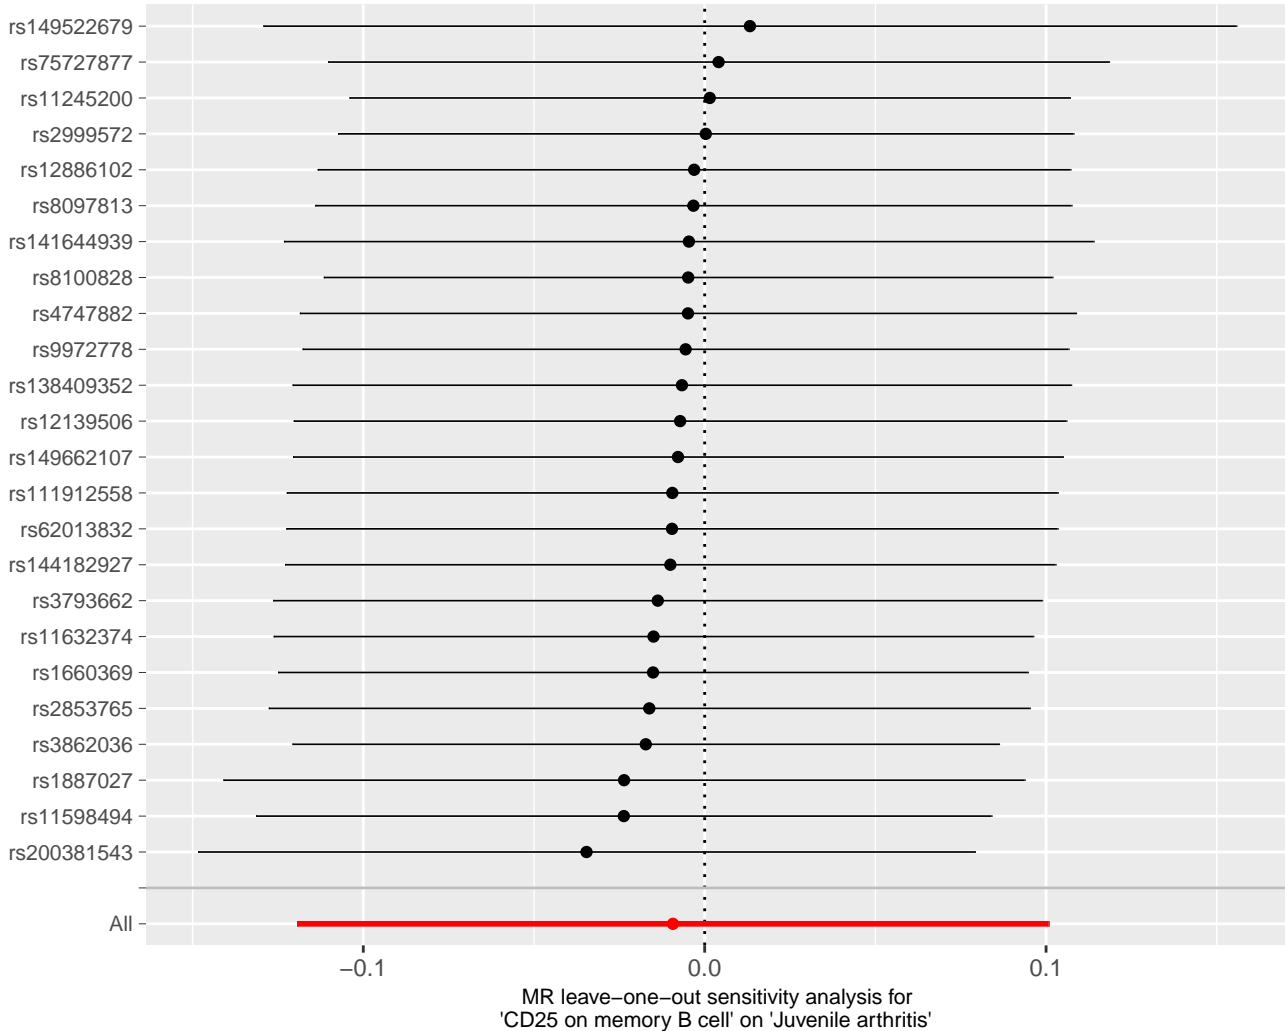

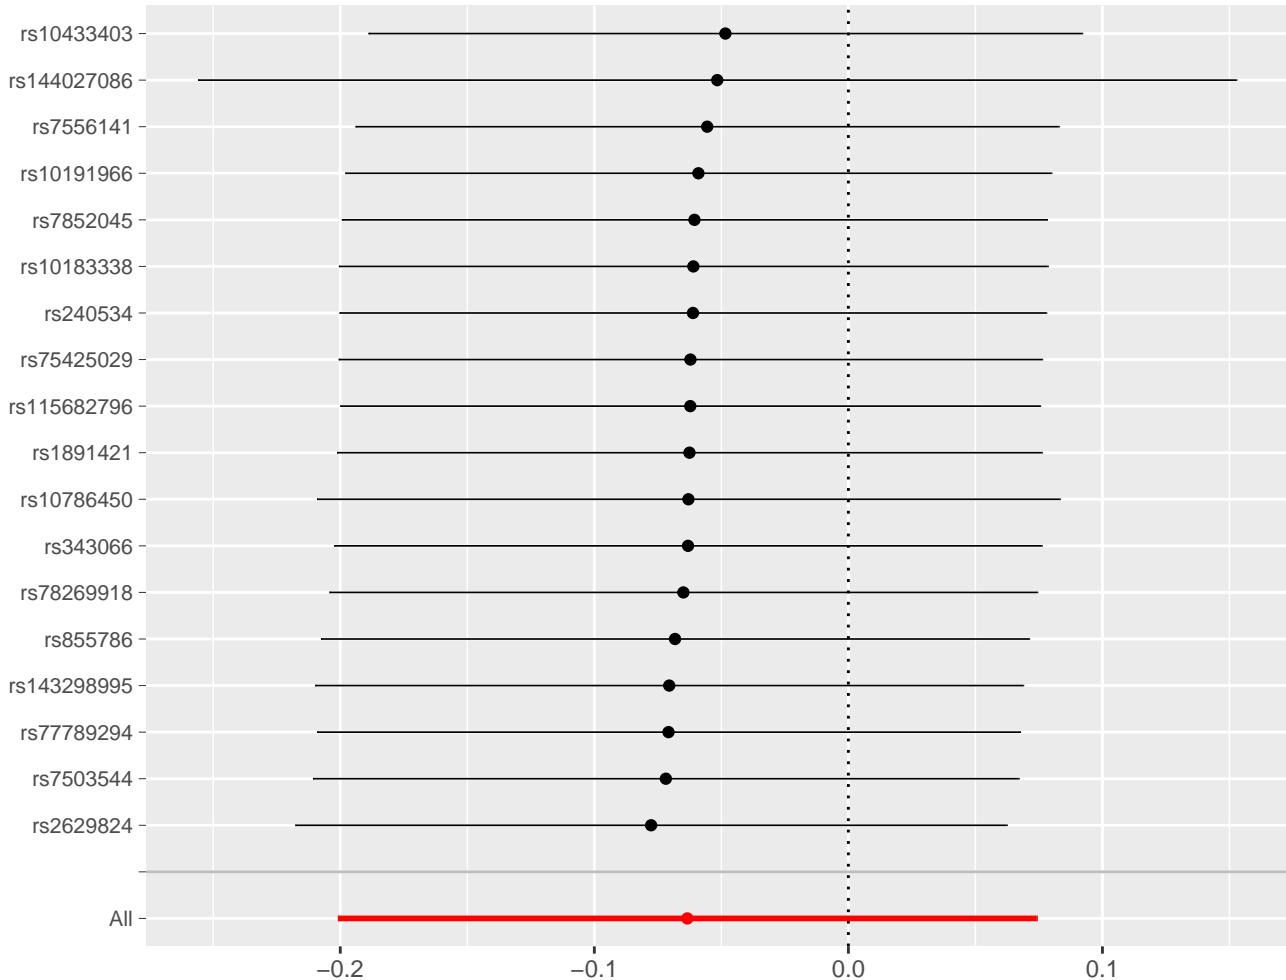

MR leave-one-out sensitivity analysis for 'FSC-A on CD8br' on 'Juvenile arthritis'

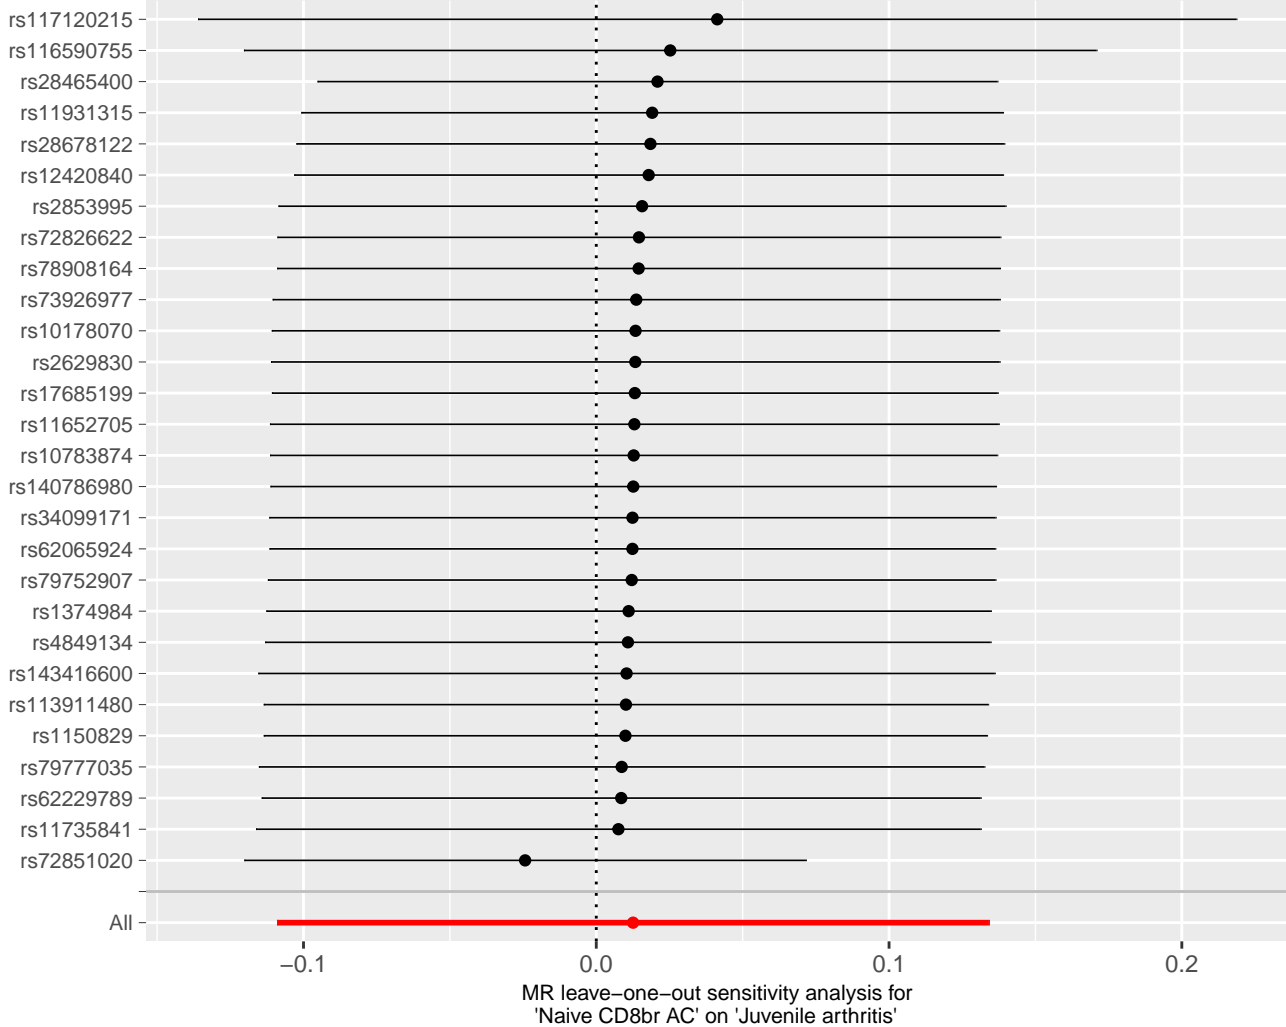

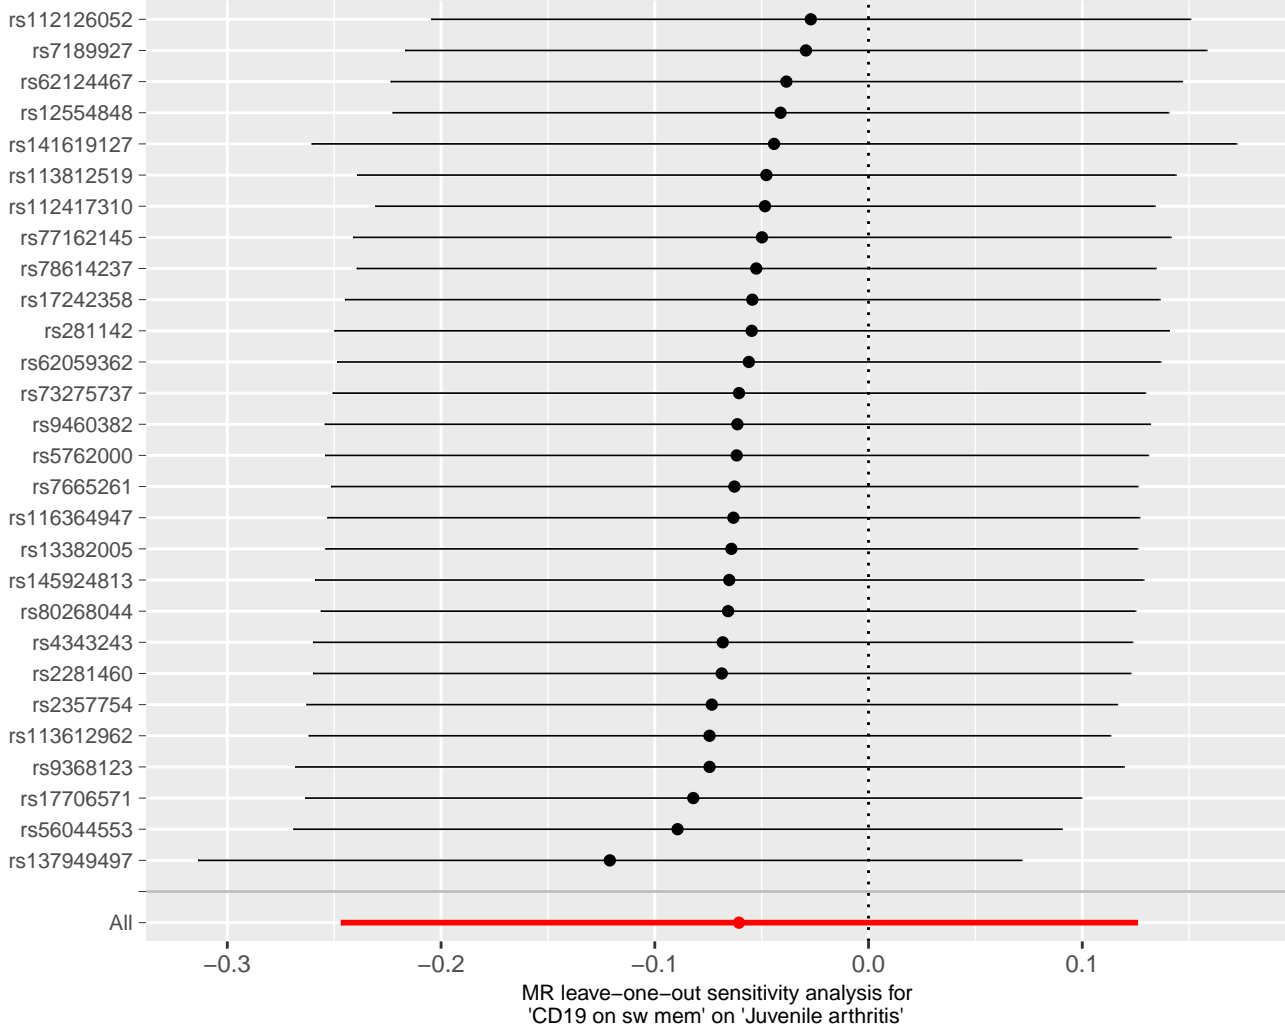

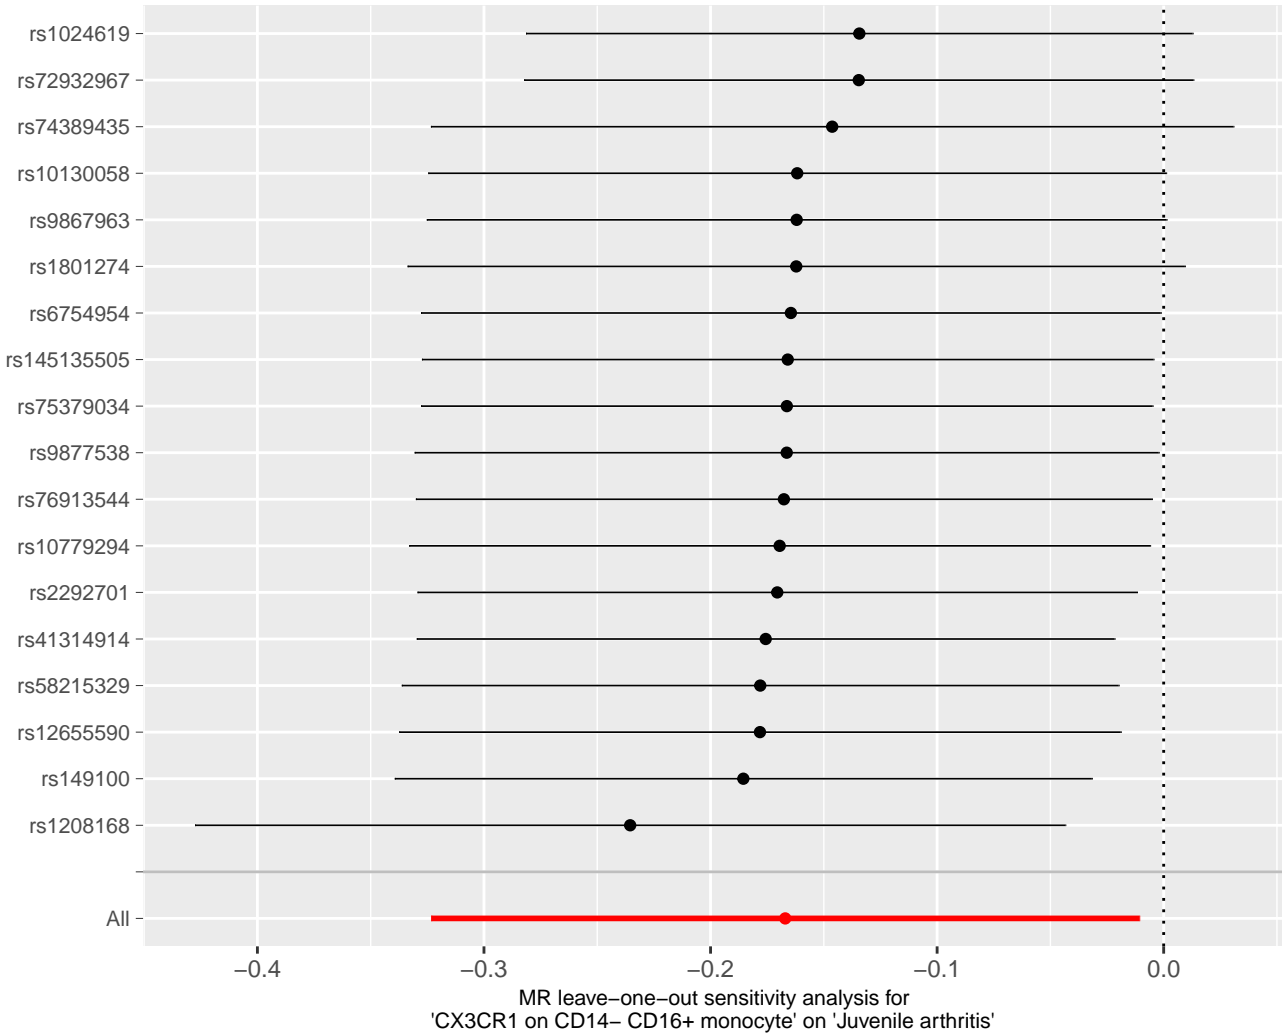

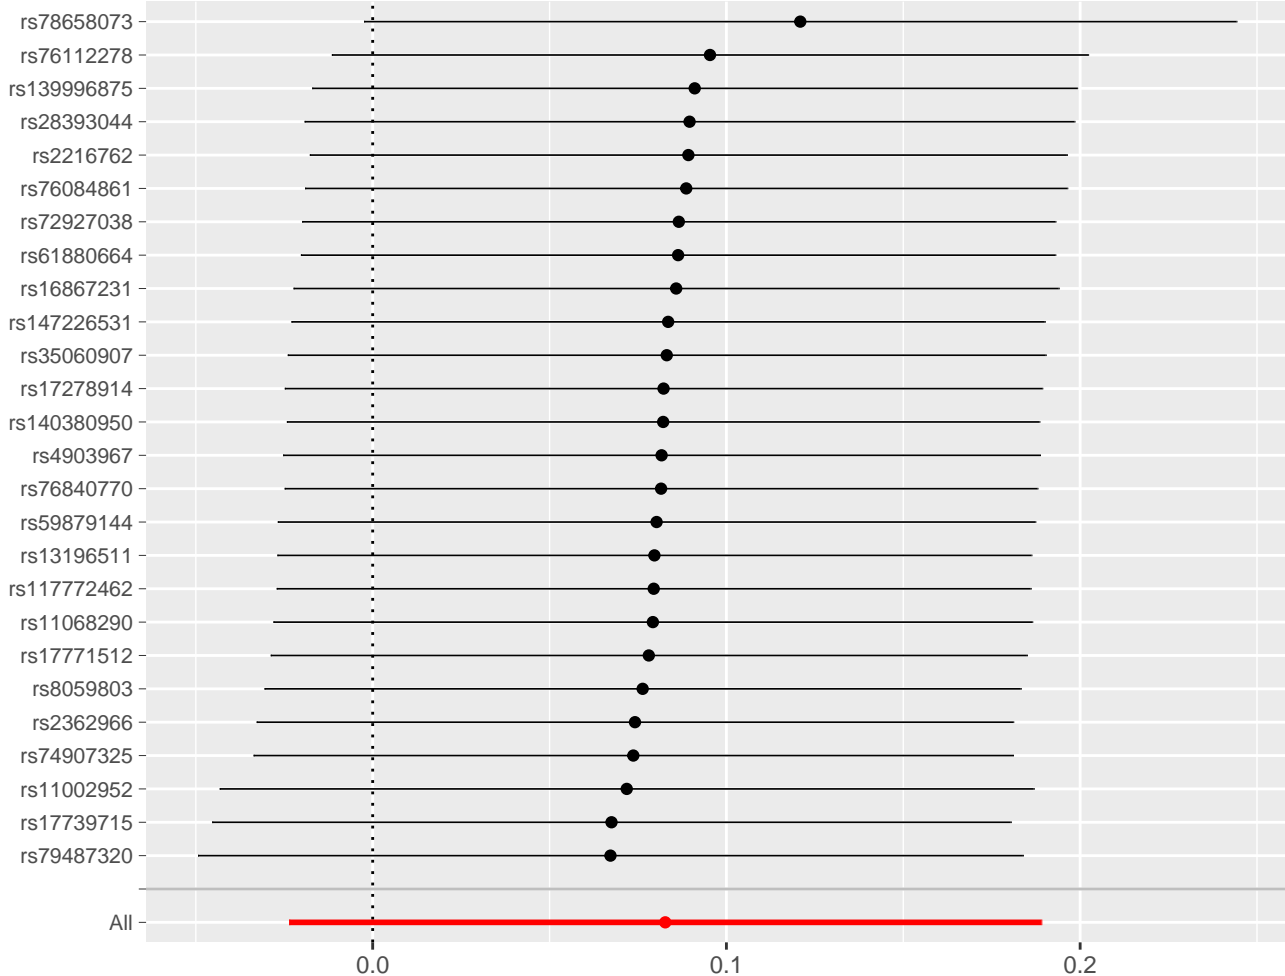

MR leave-one-out sensitivity analysis for 'IgD+ CD38br %B cell' on 'Juvenile arthritis'



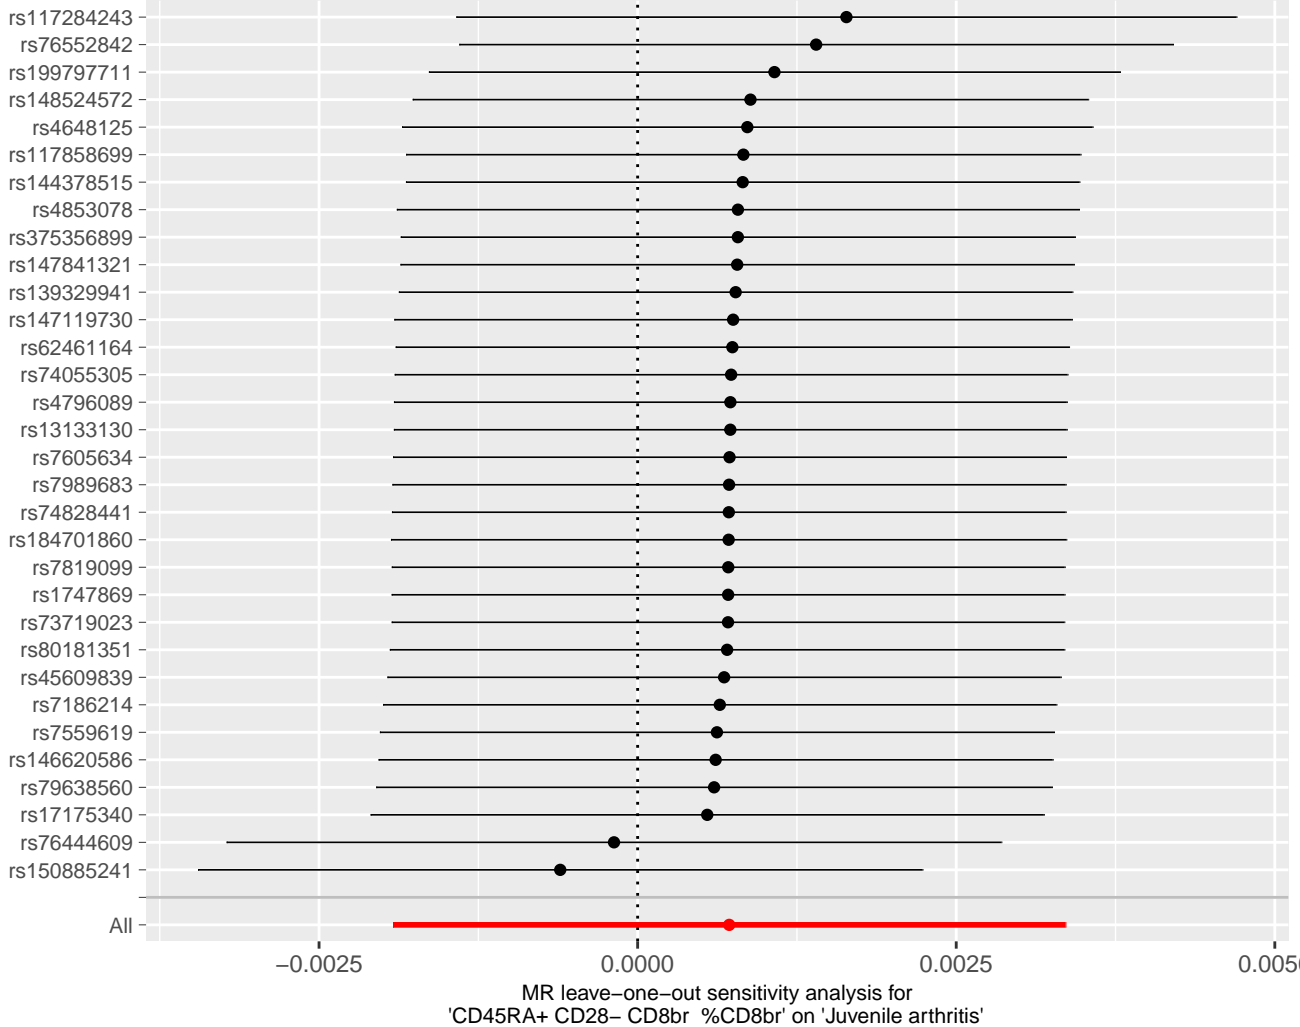

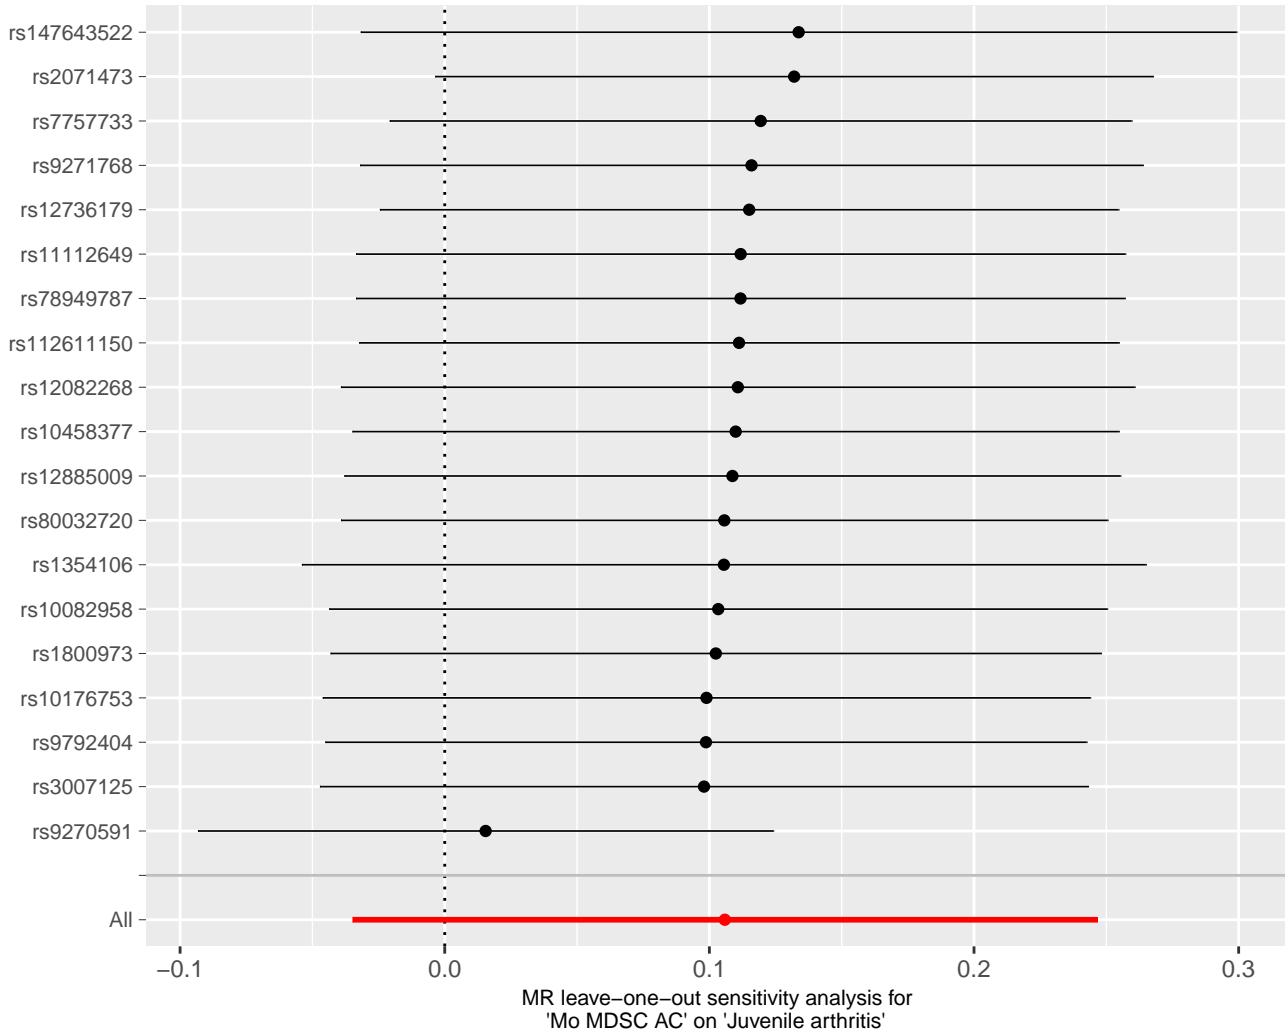

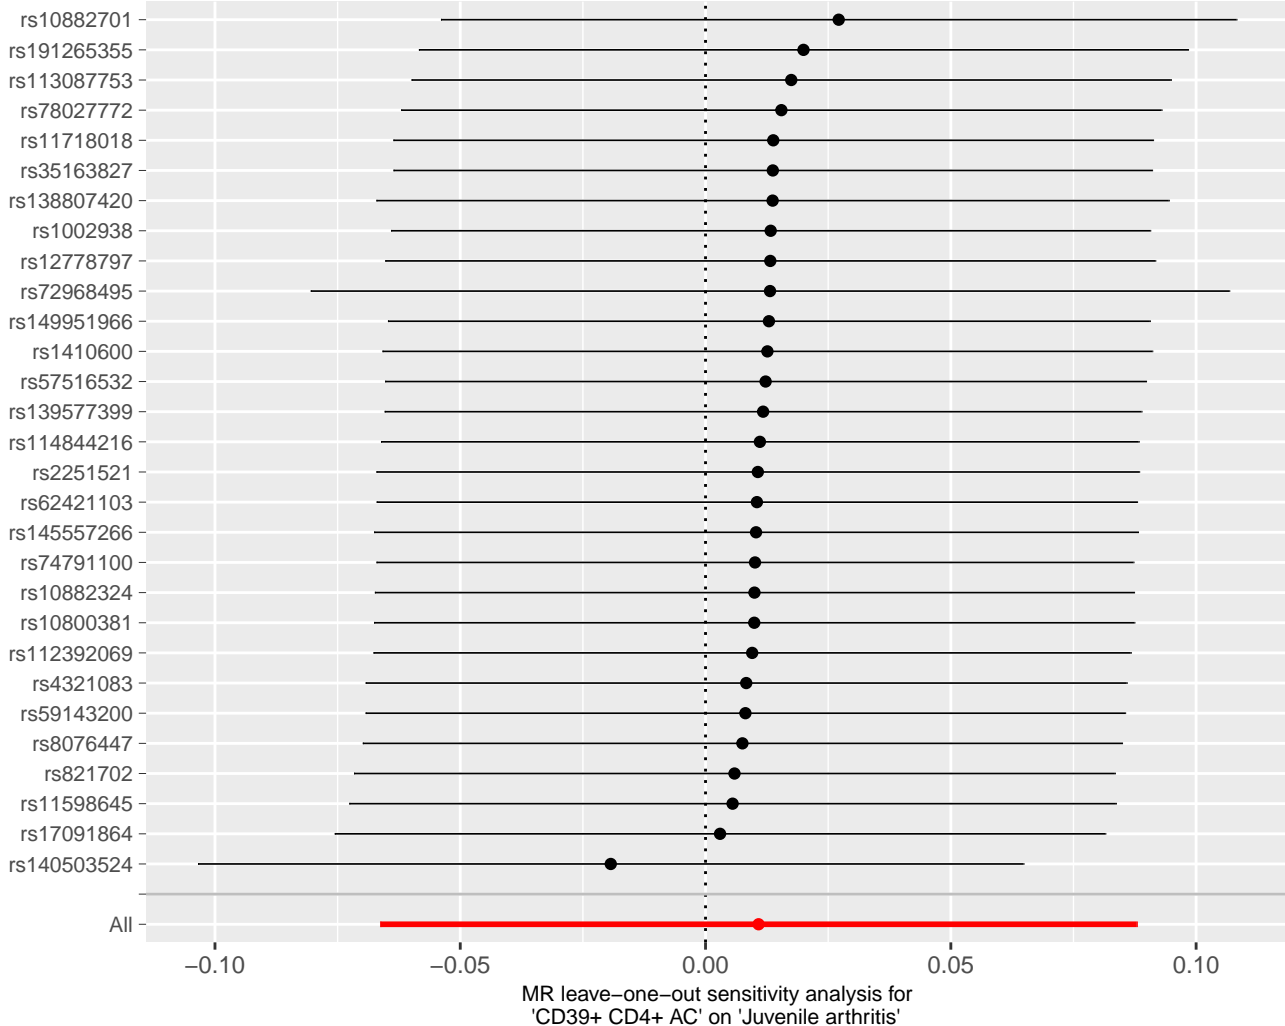

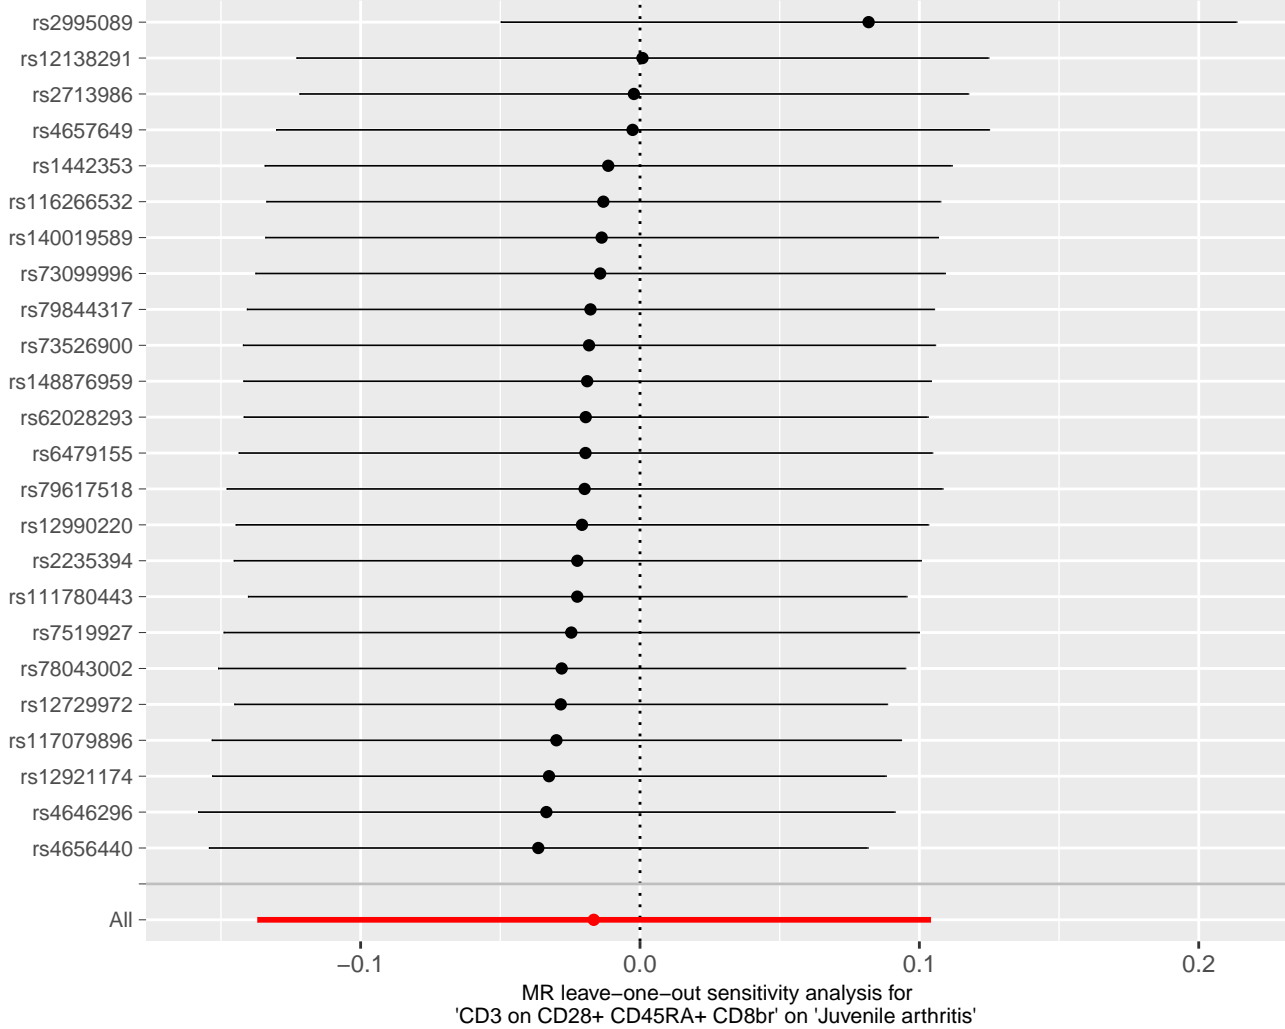

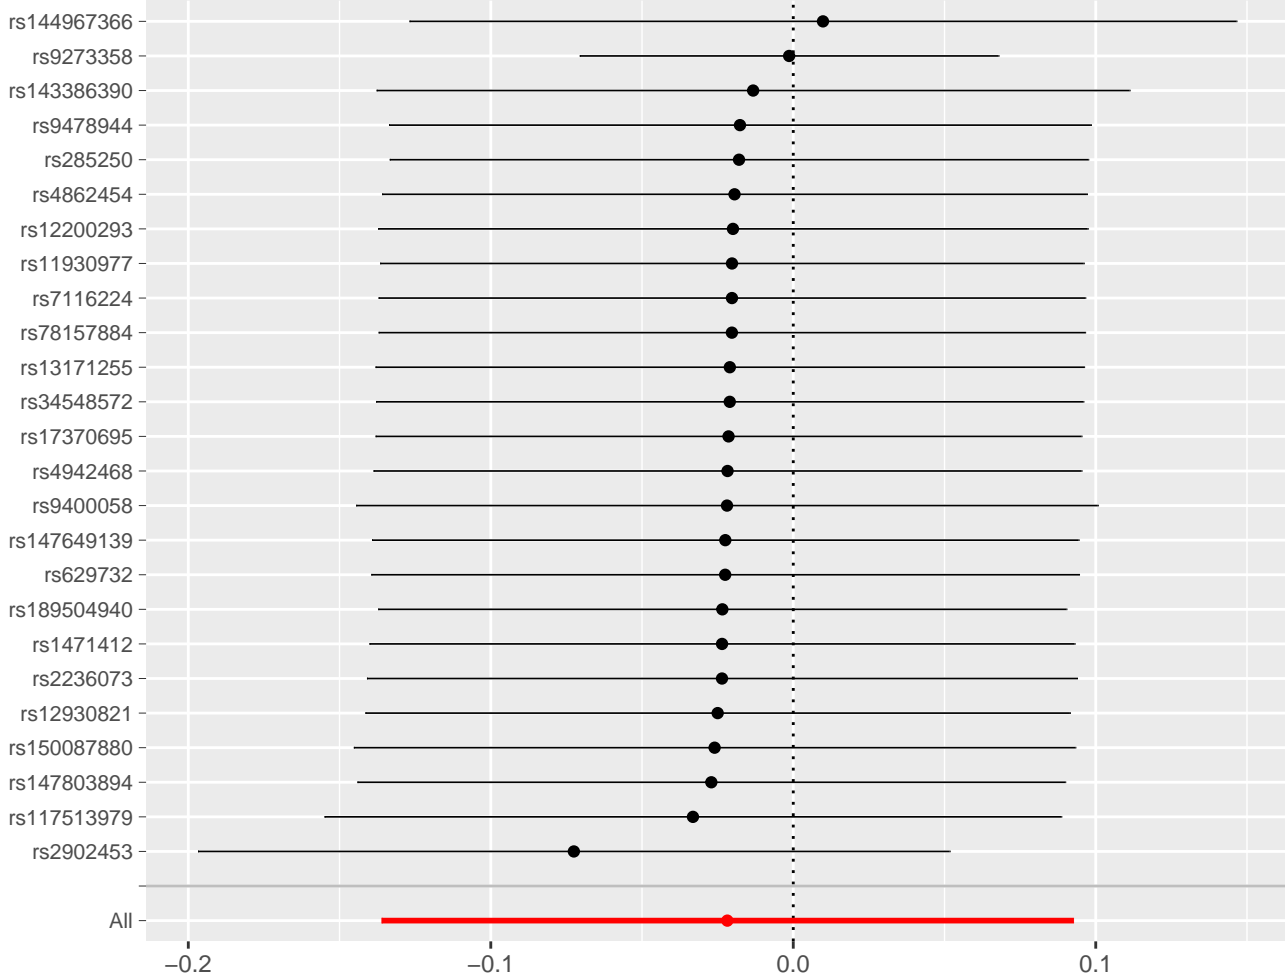

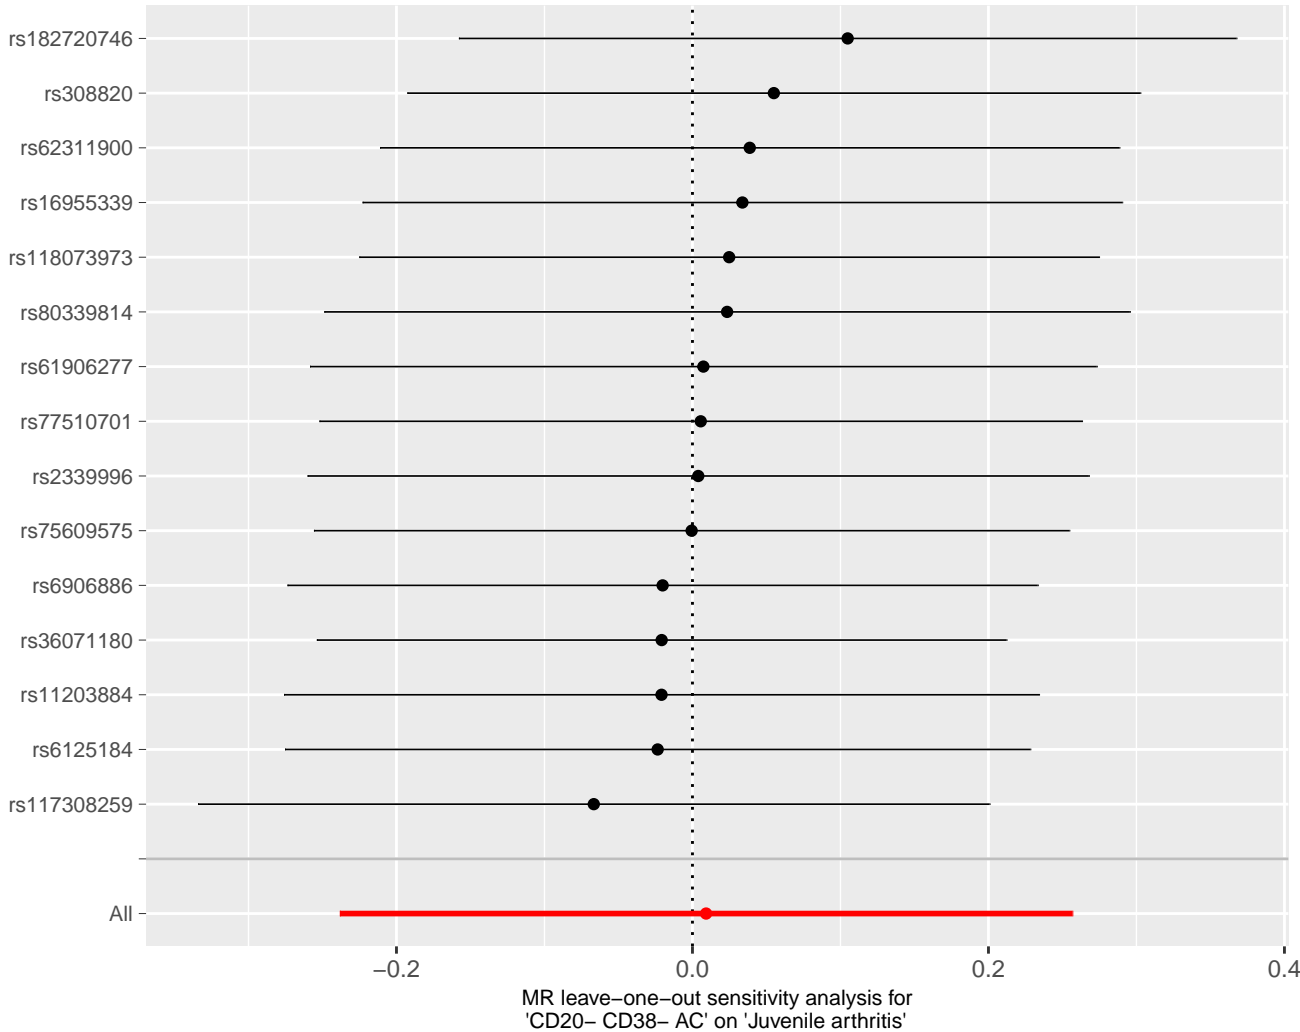

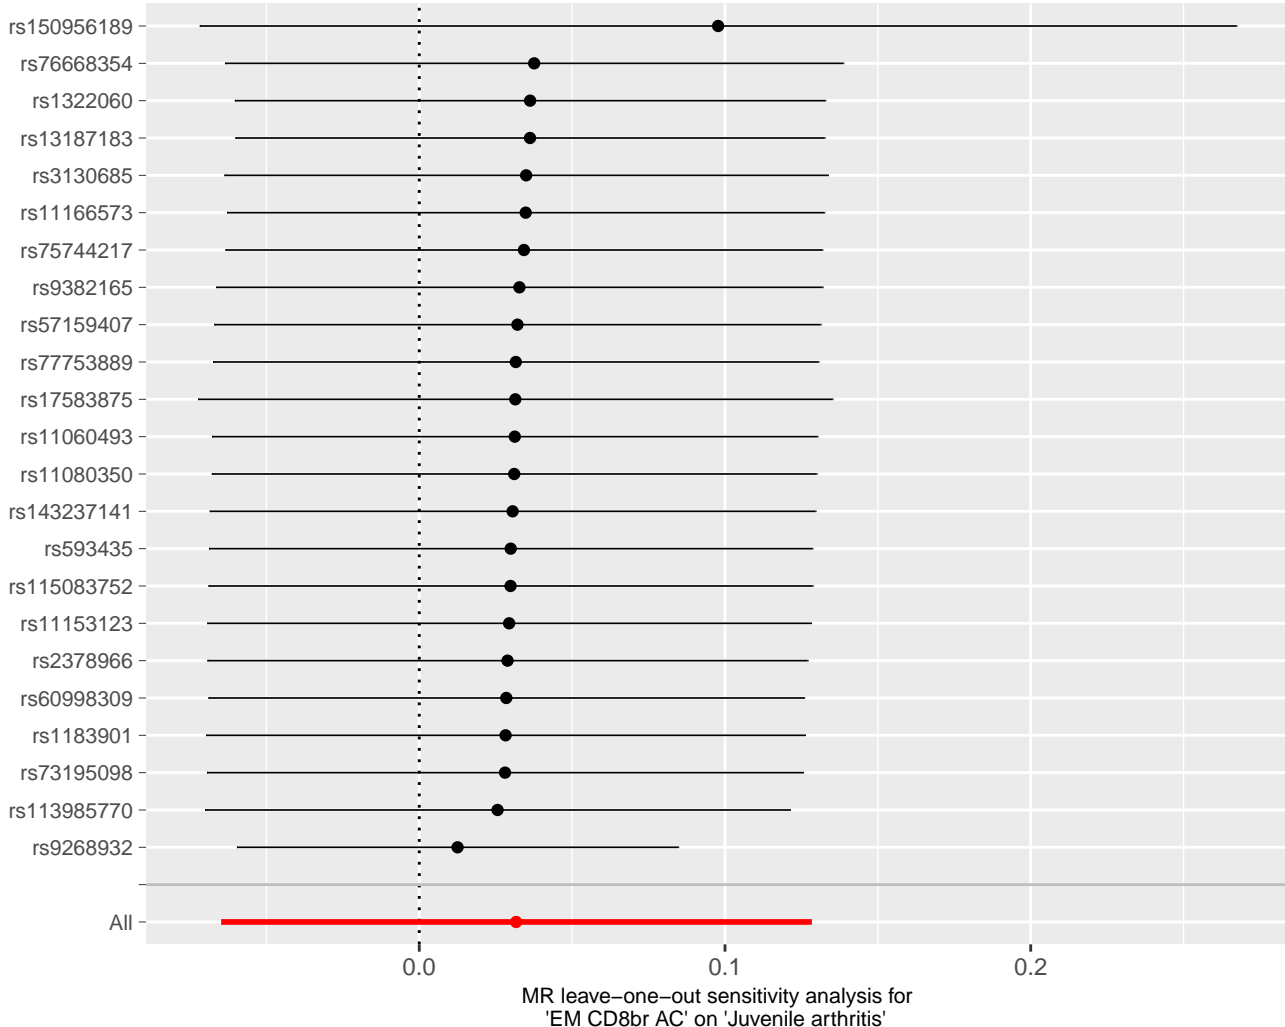

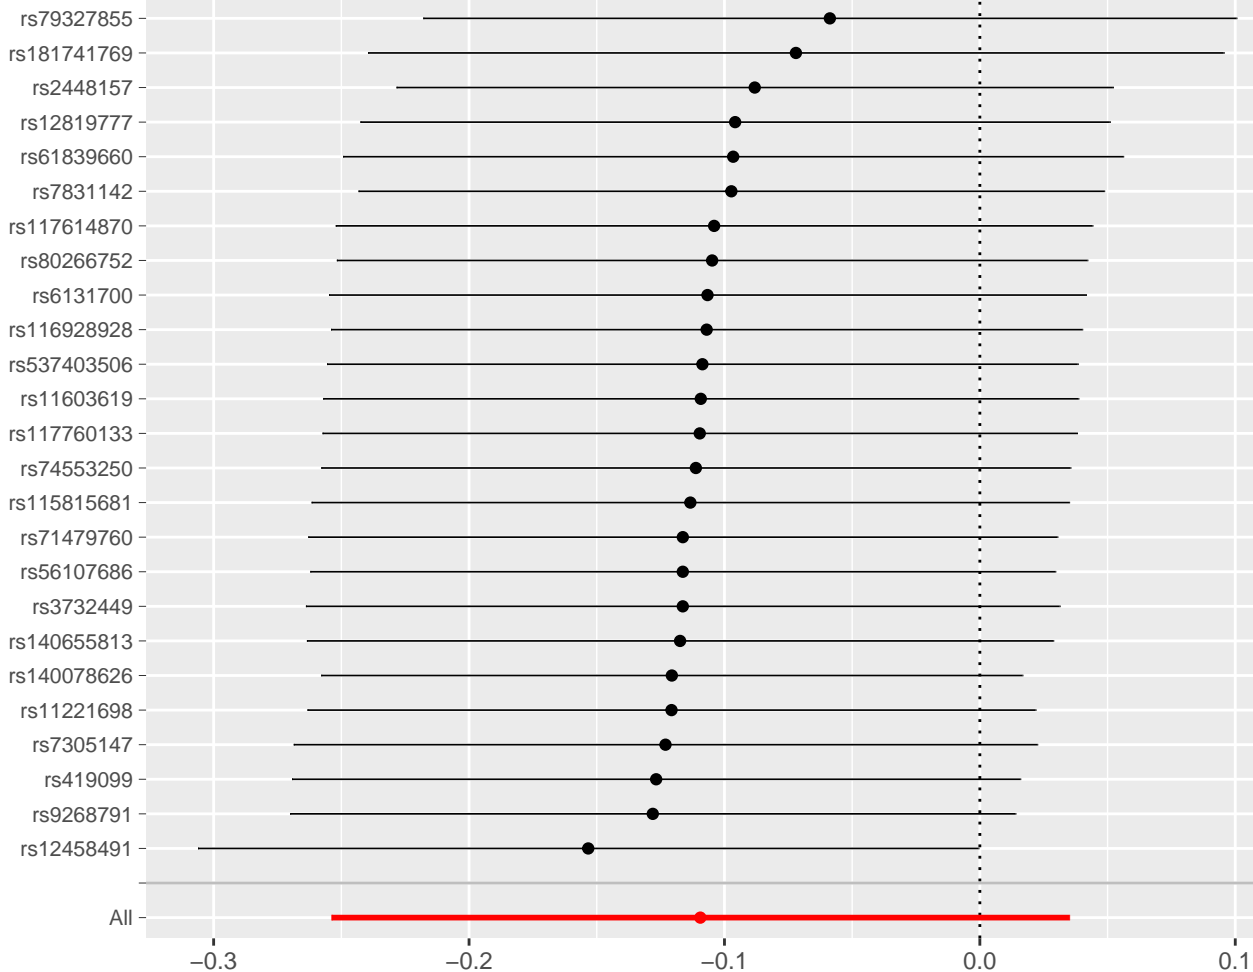



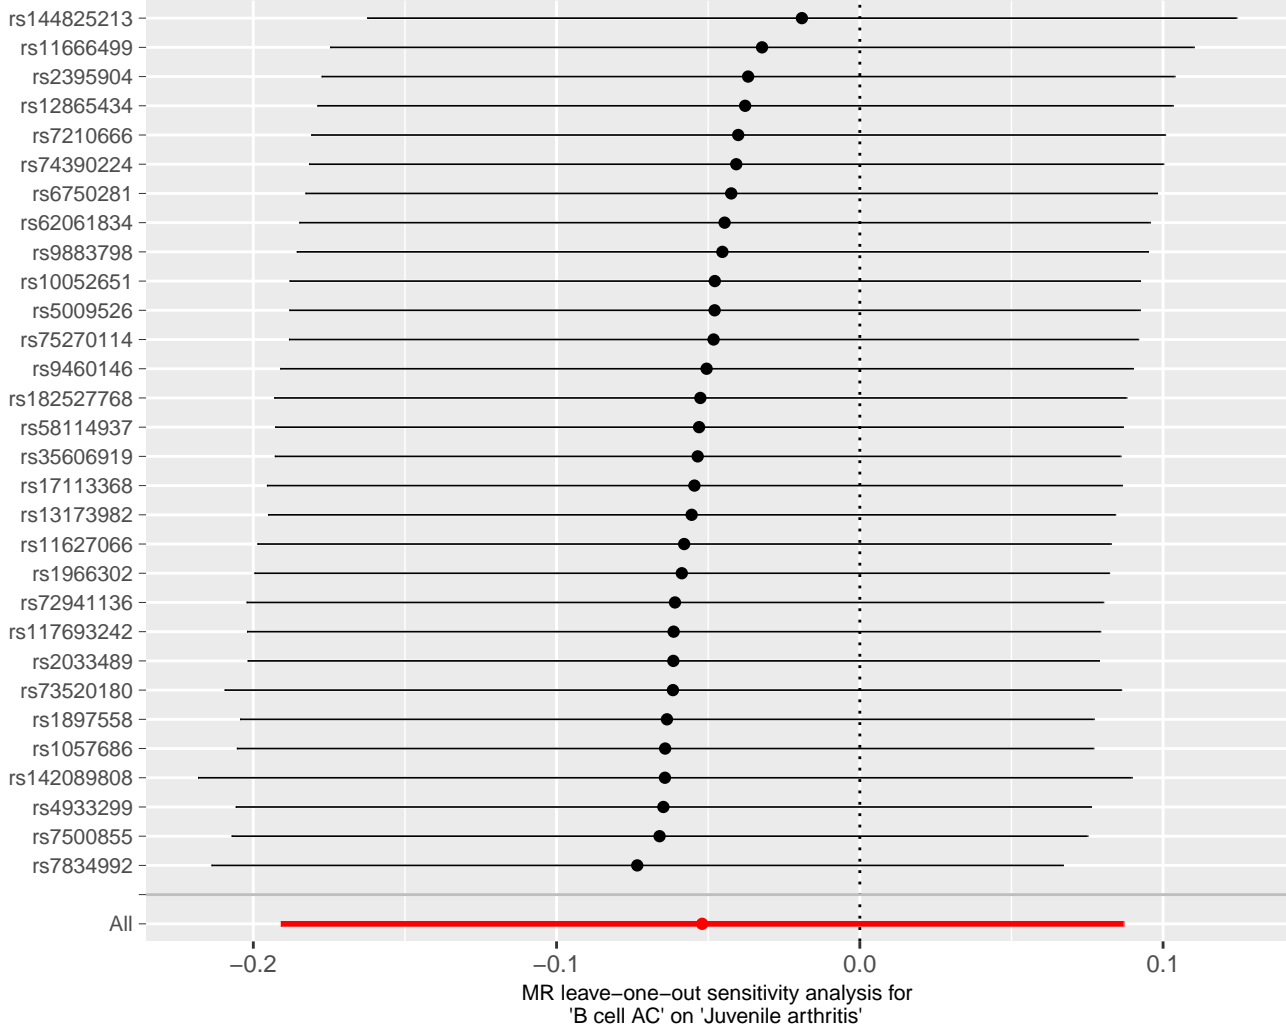

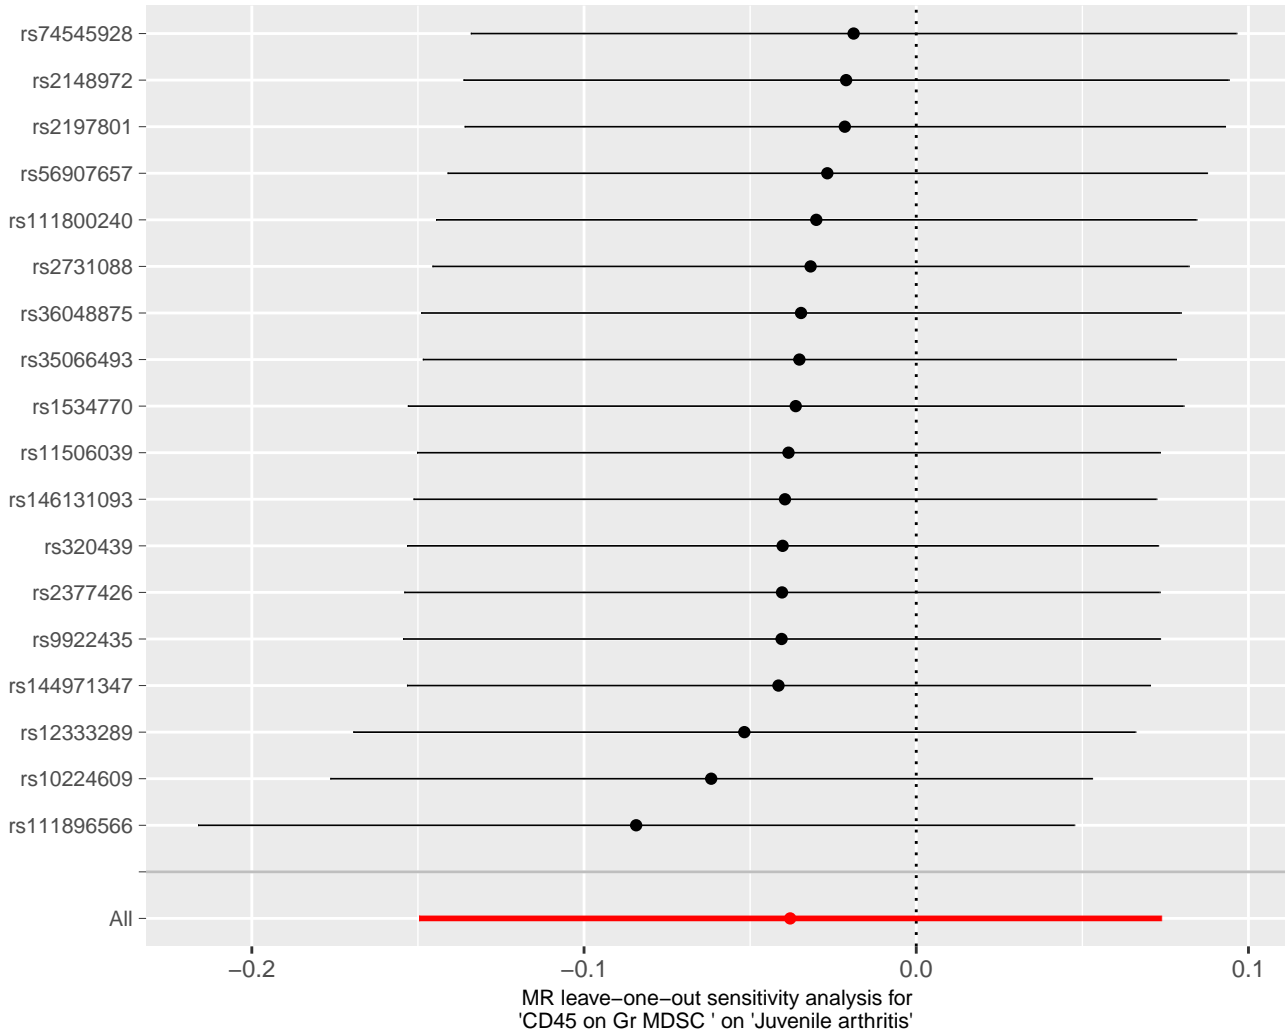

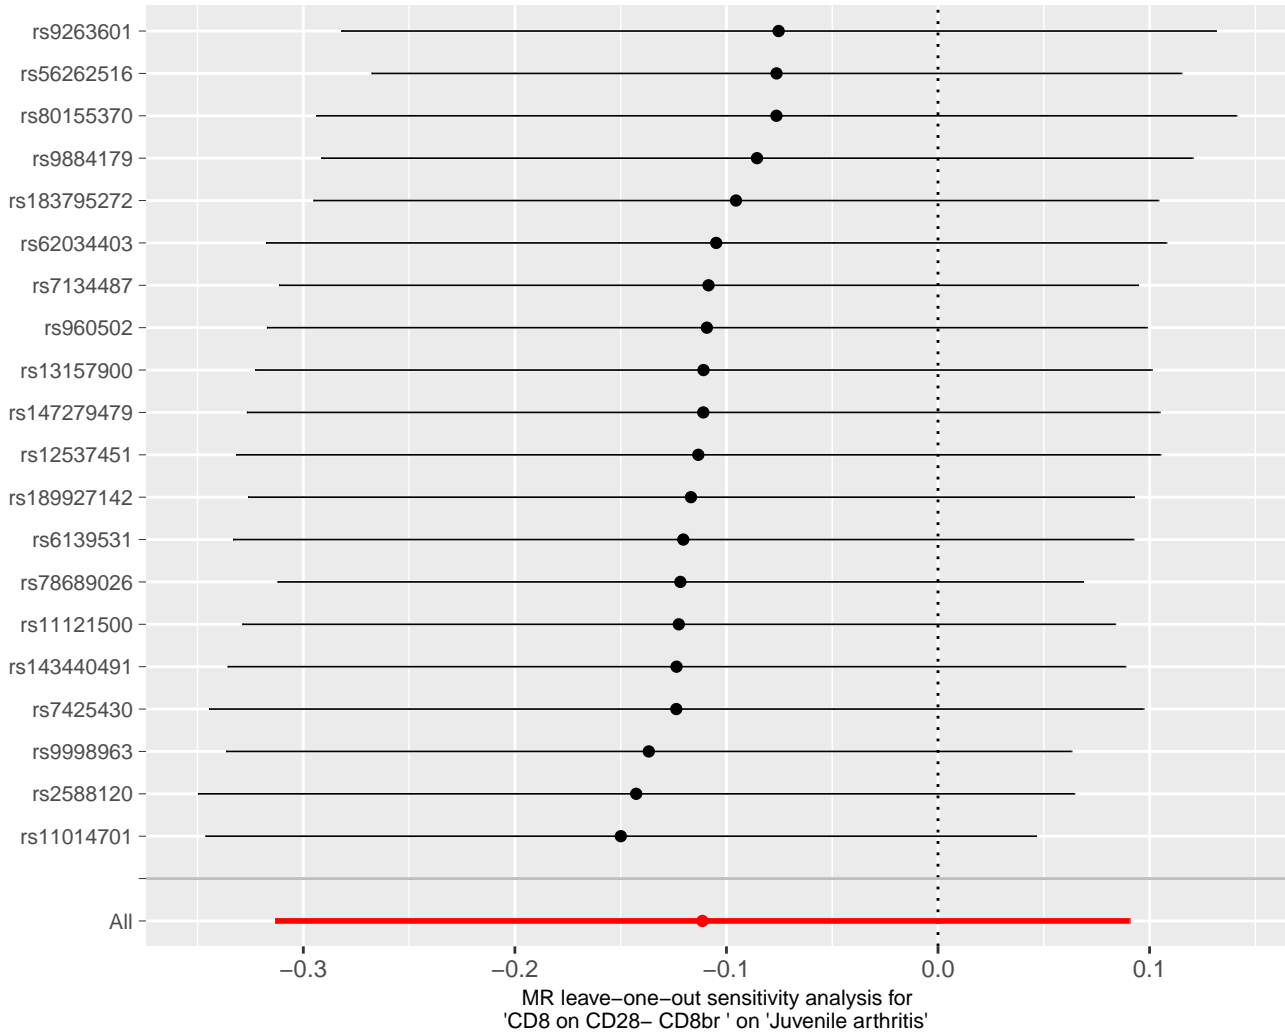

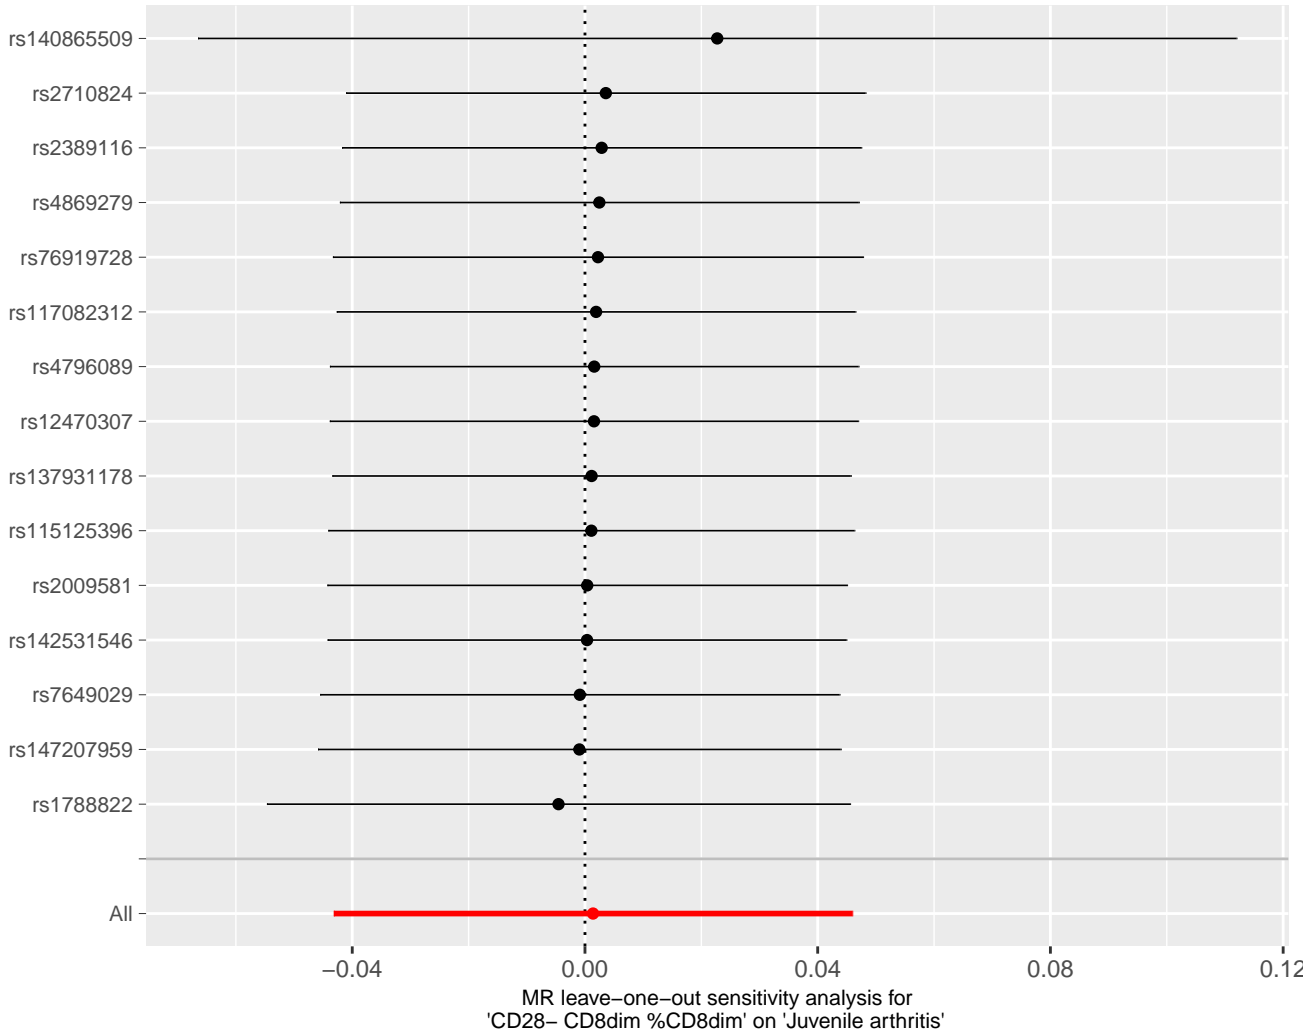

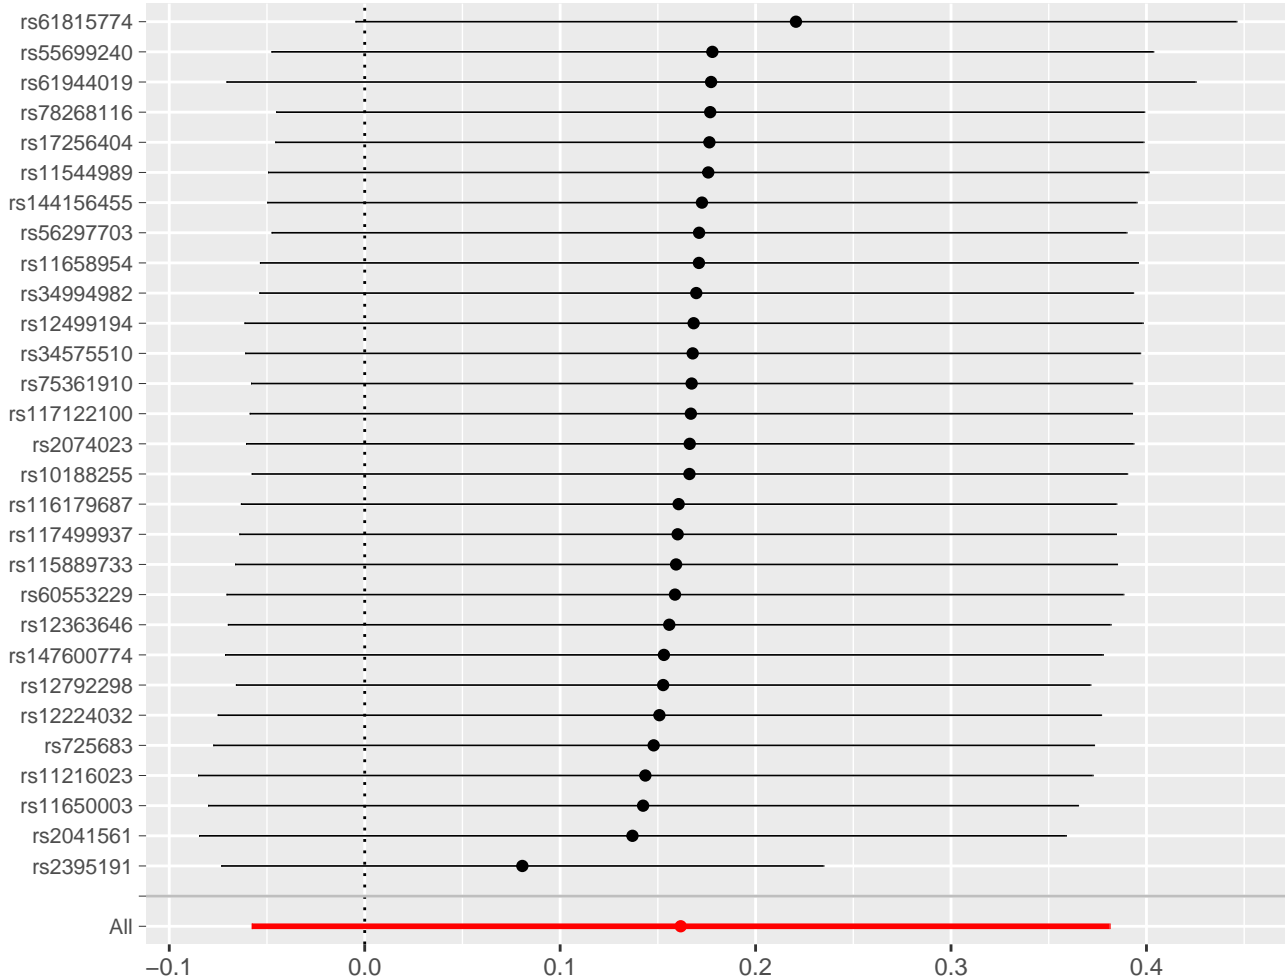

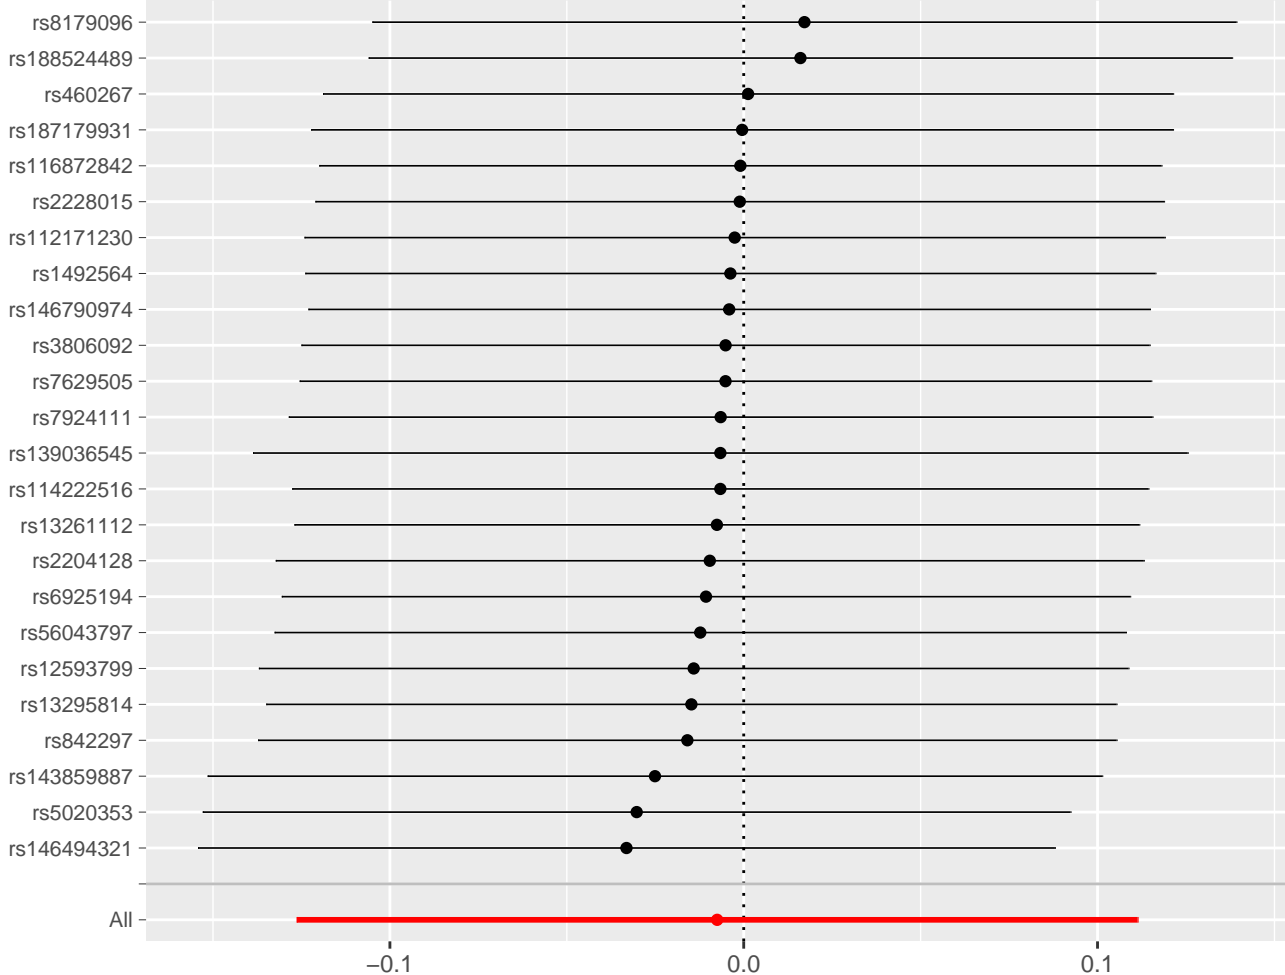

MR leave-one-out sensitivity analysis for 'CCR7 on naive CD8br' on 'Juvenile arthritis'

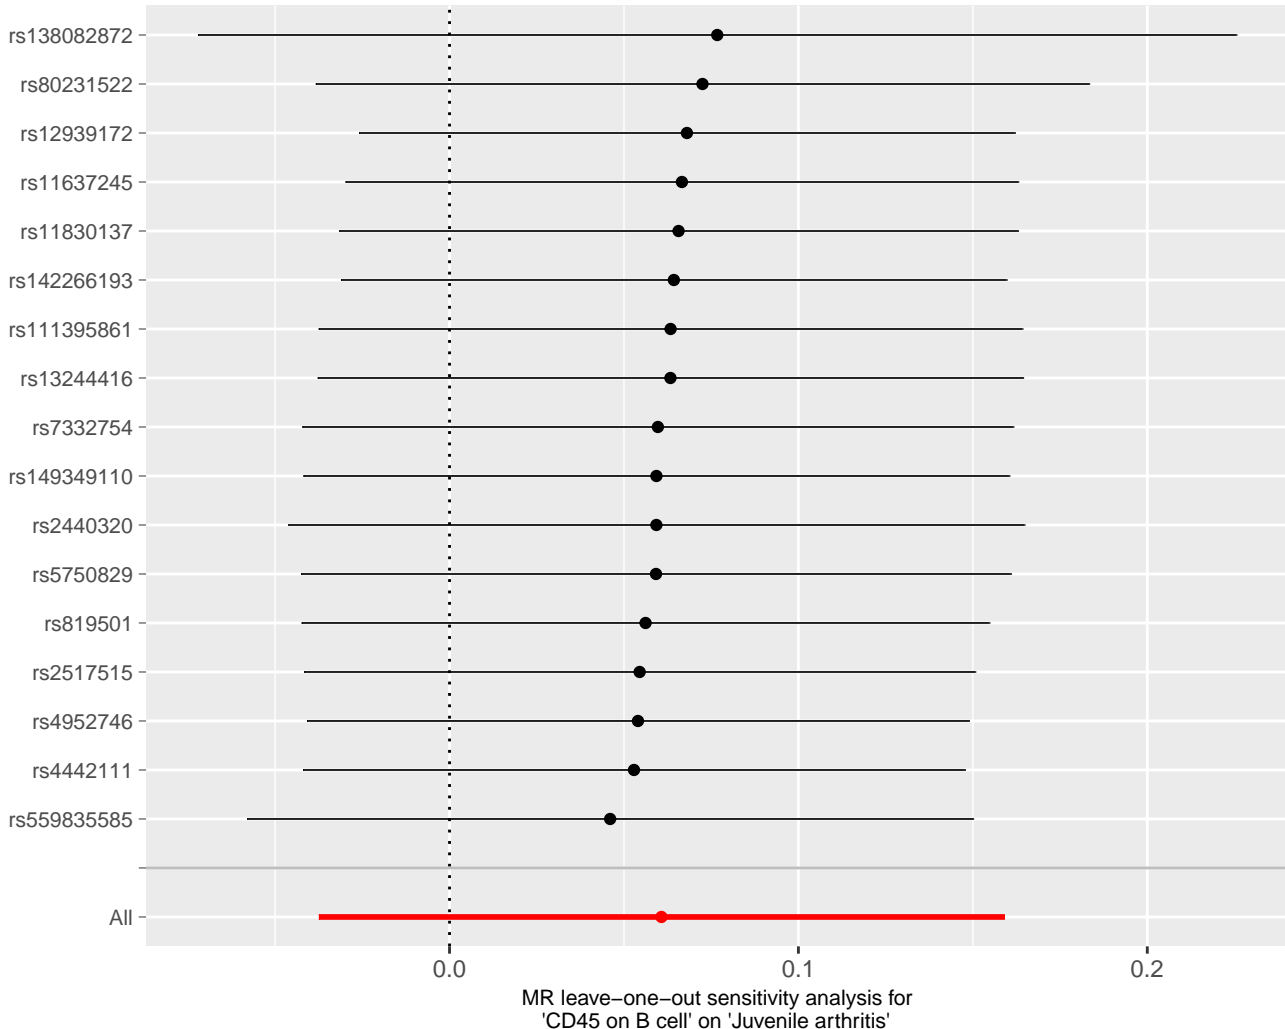

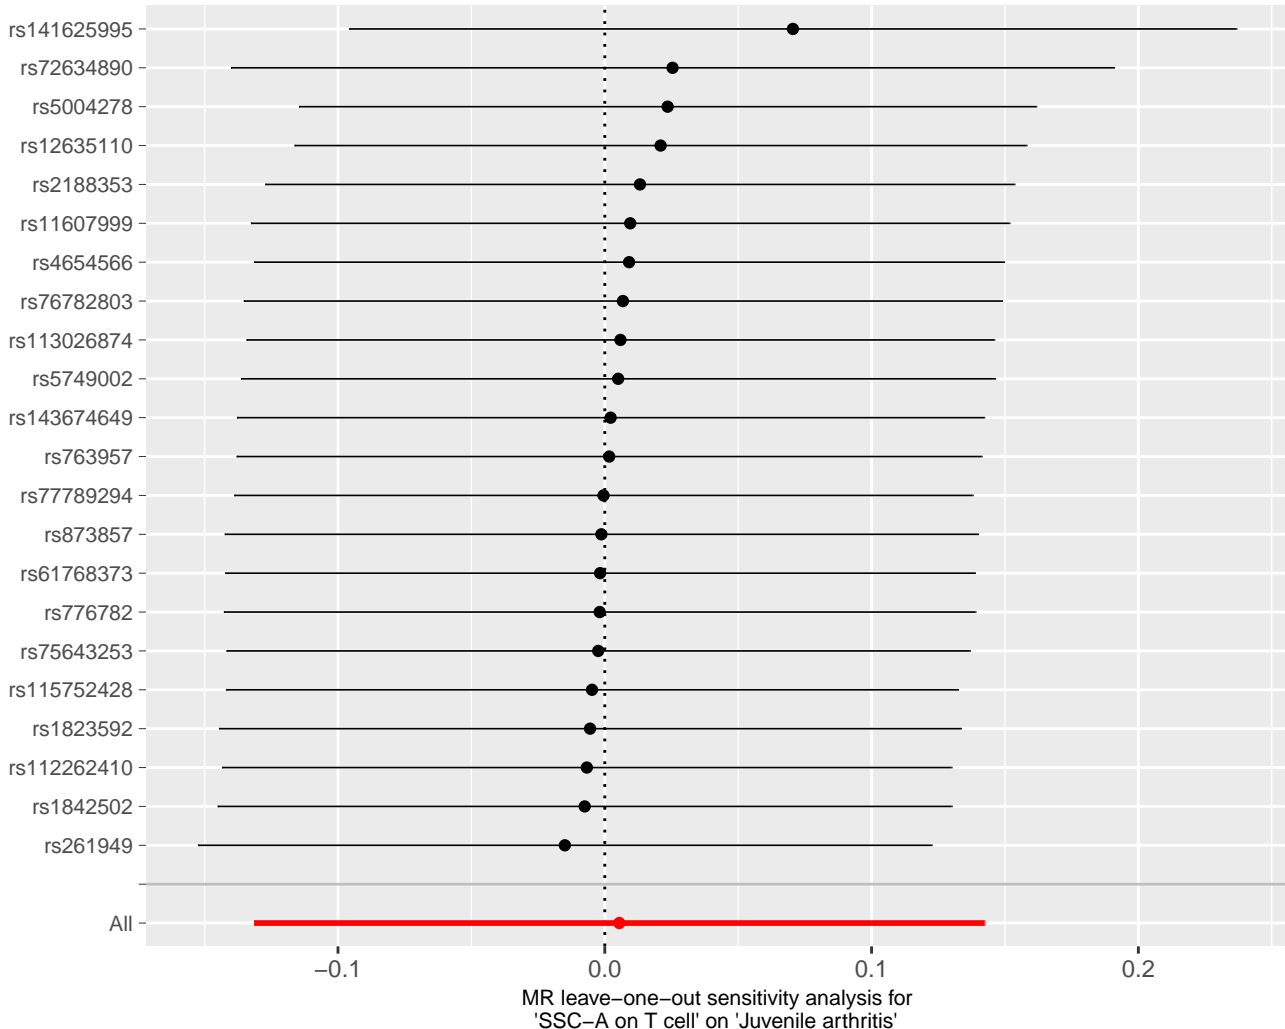

MR leave-one-out sensitivity analysis for 'SSC-A on T cell' on 'Juvenile arthritis'



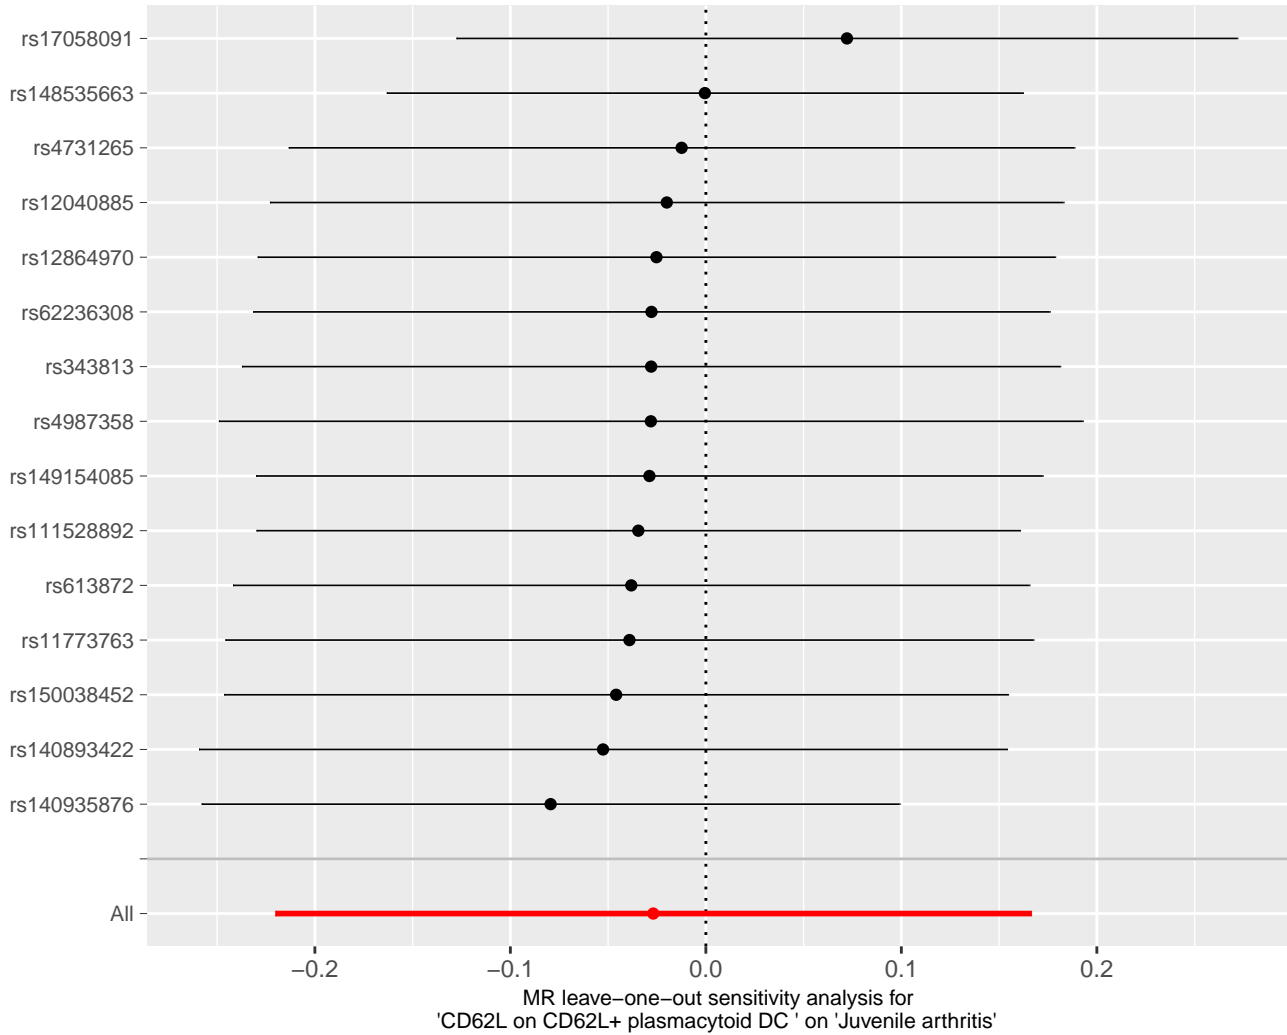

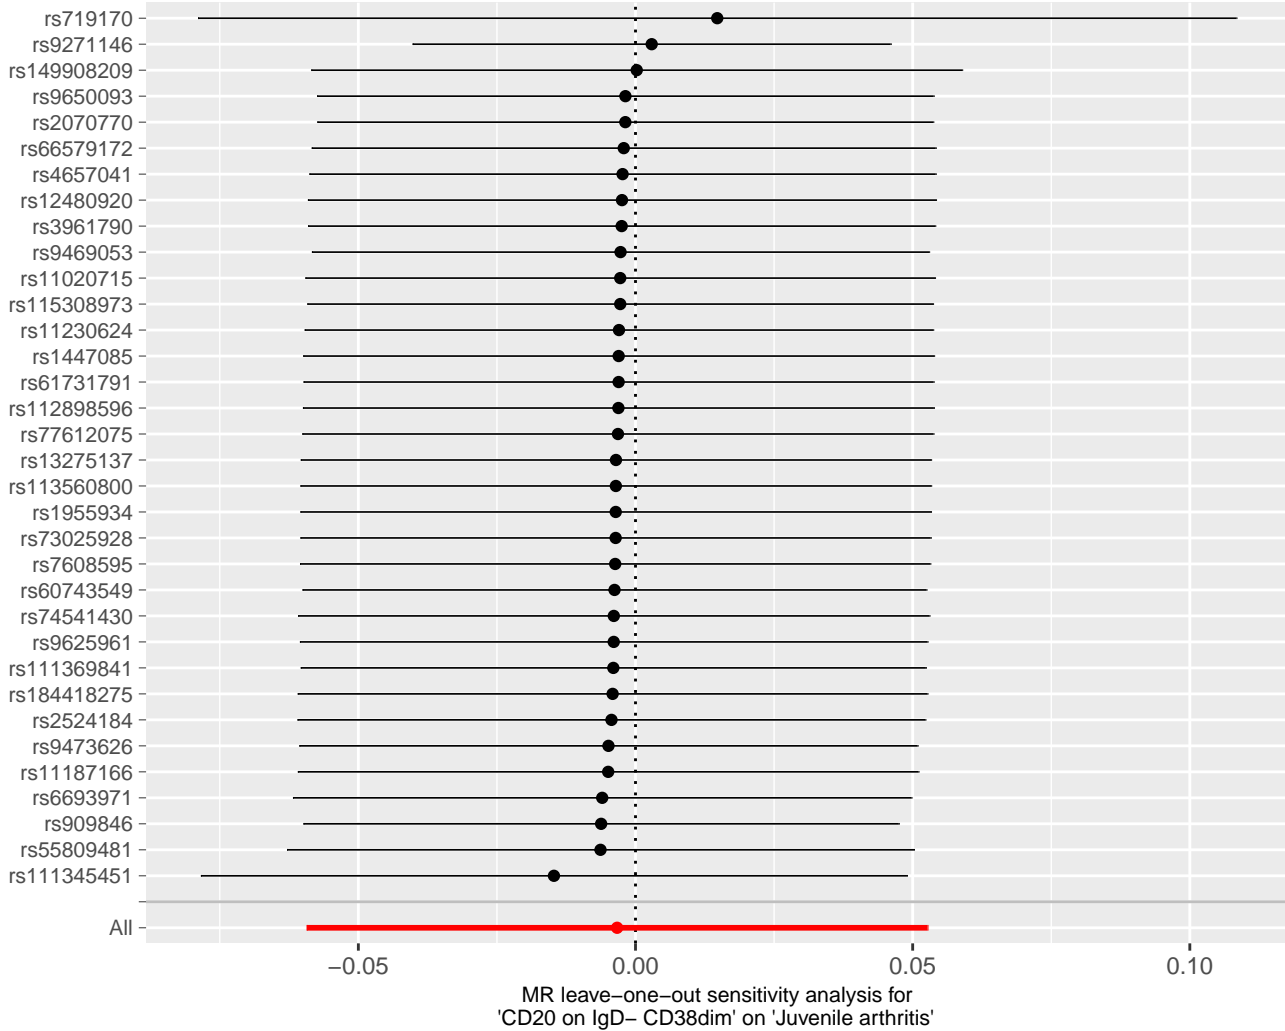

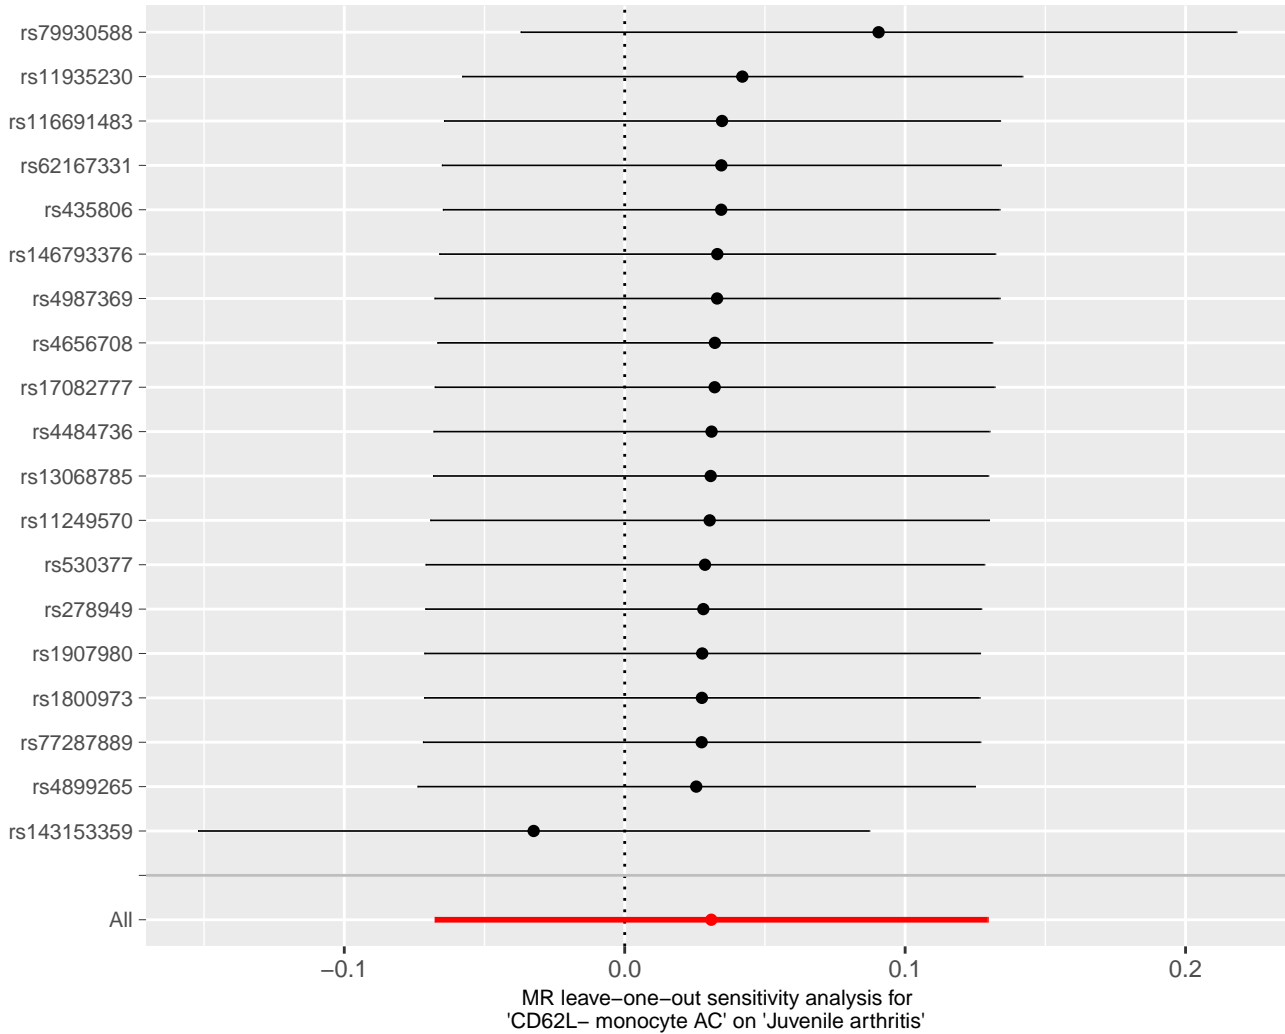

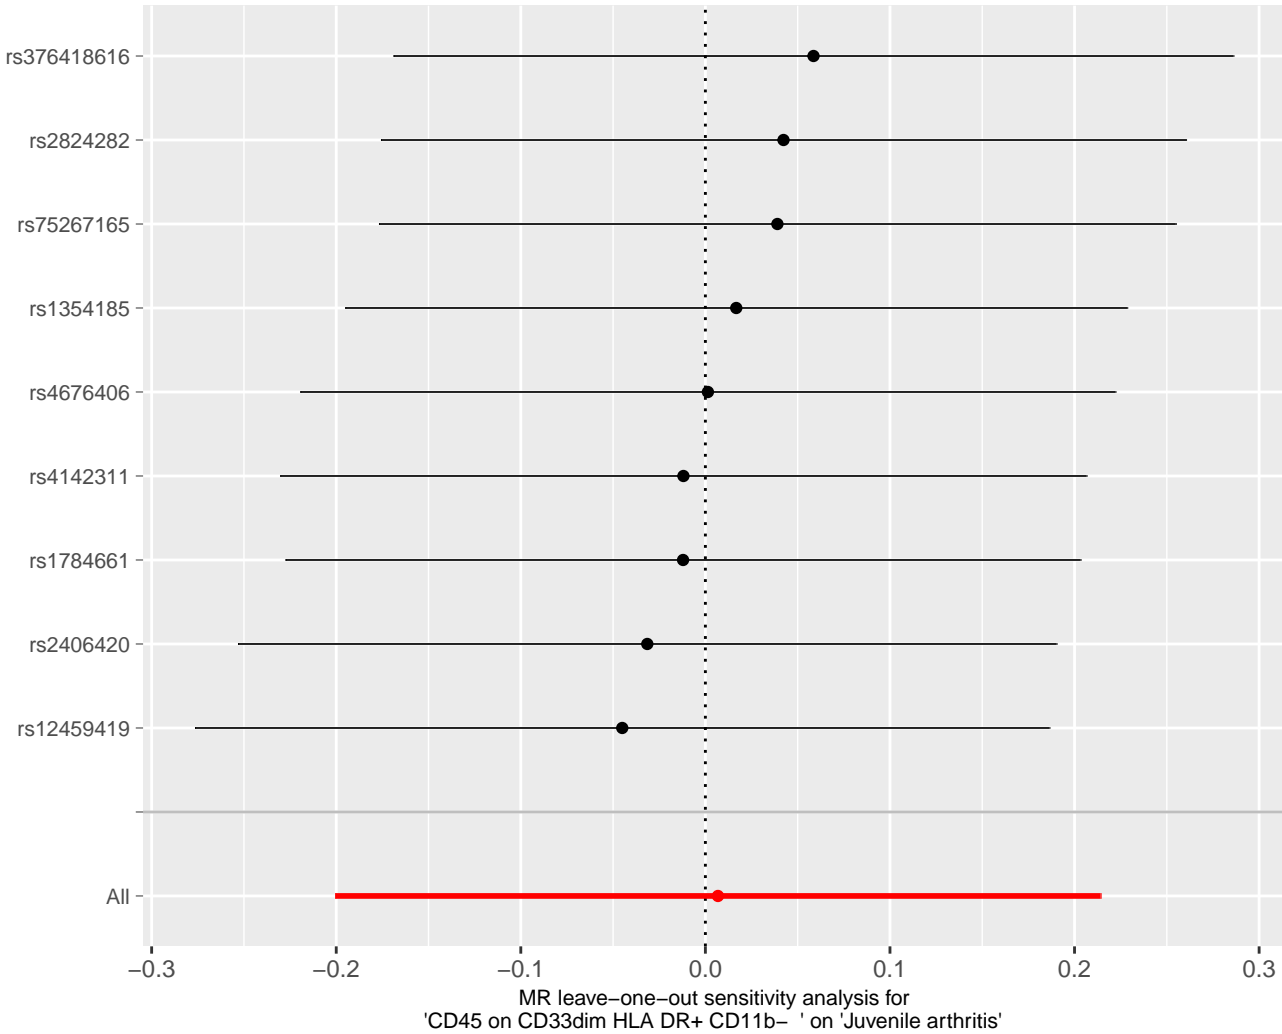

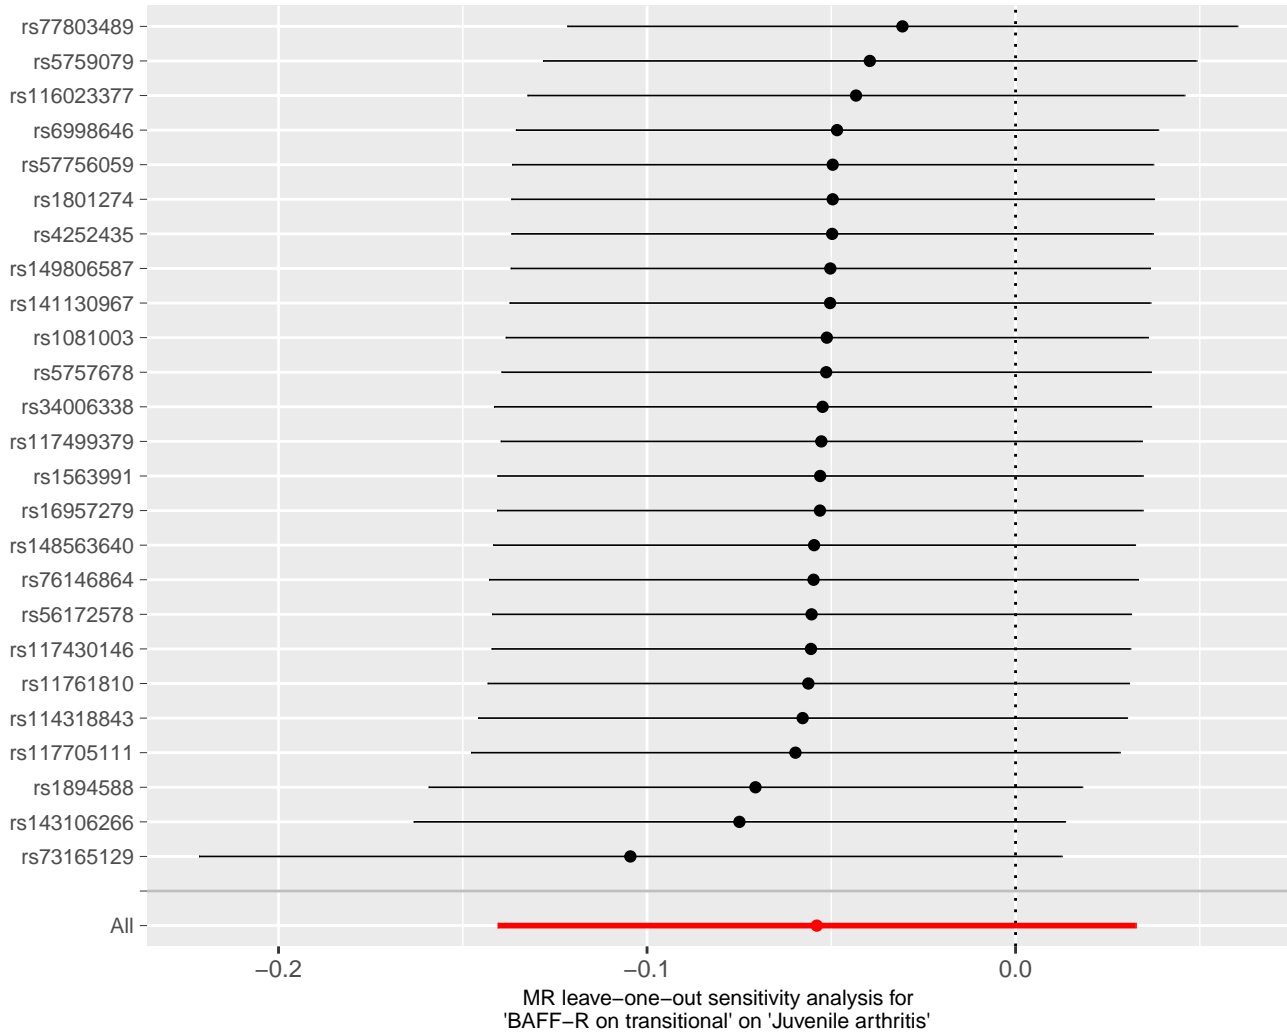

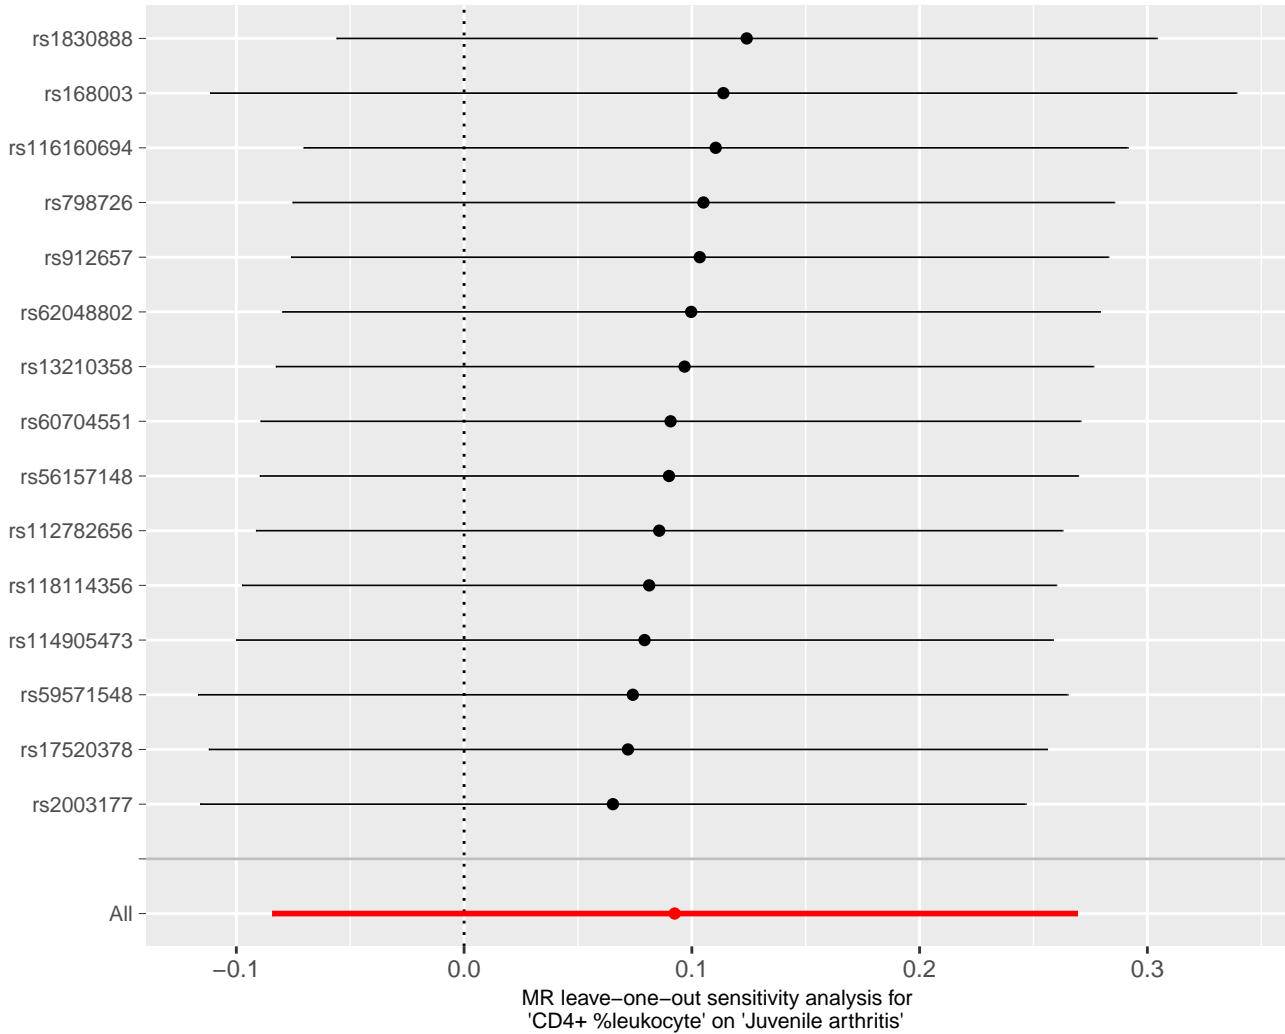

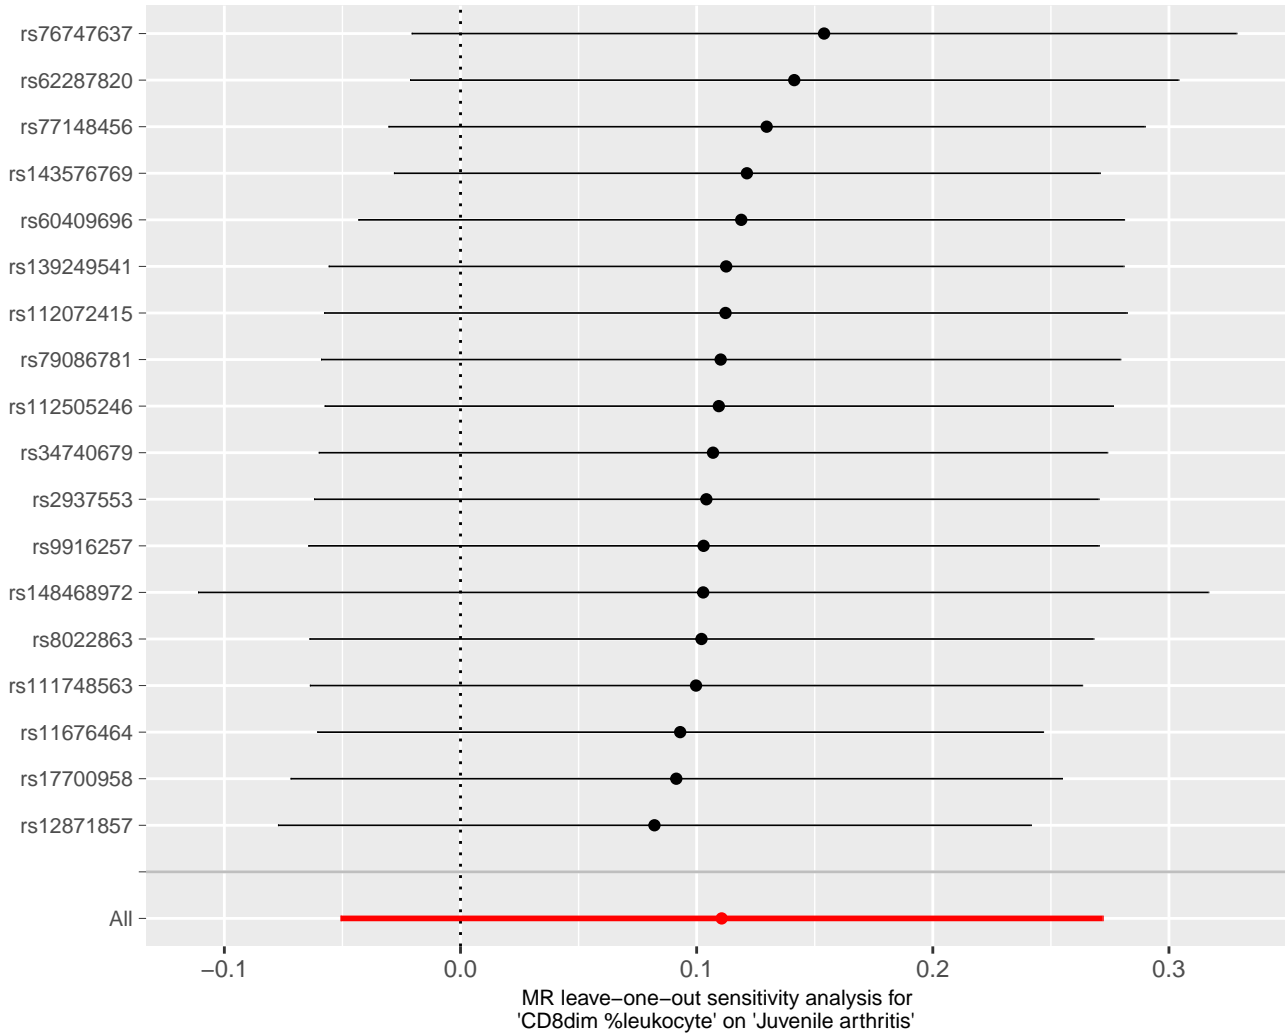

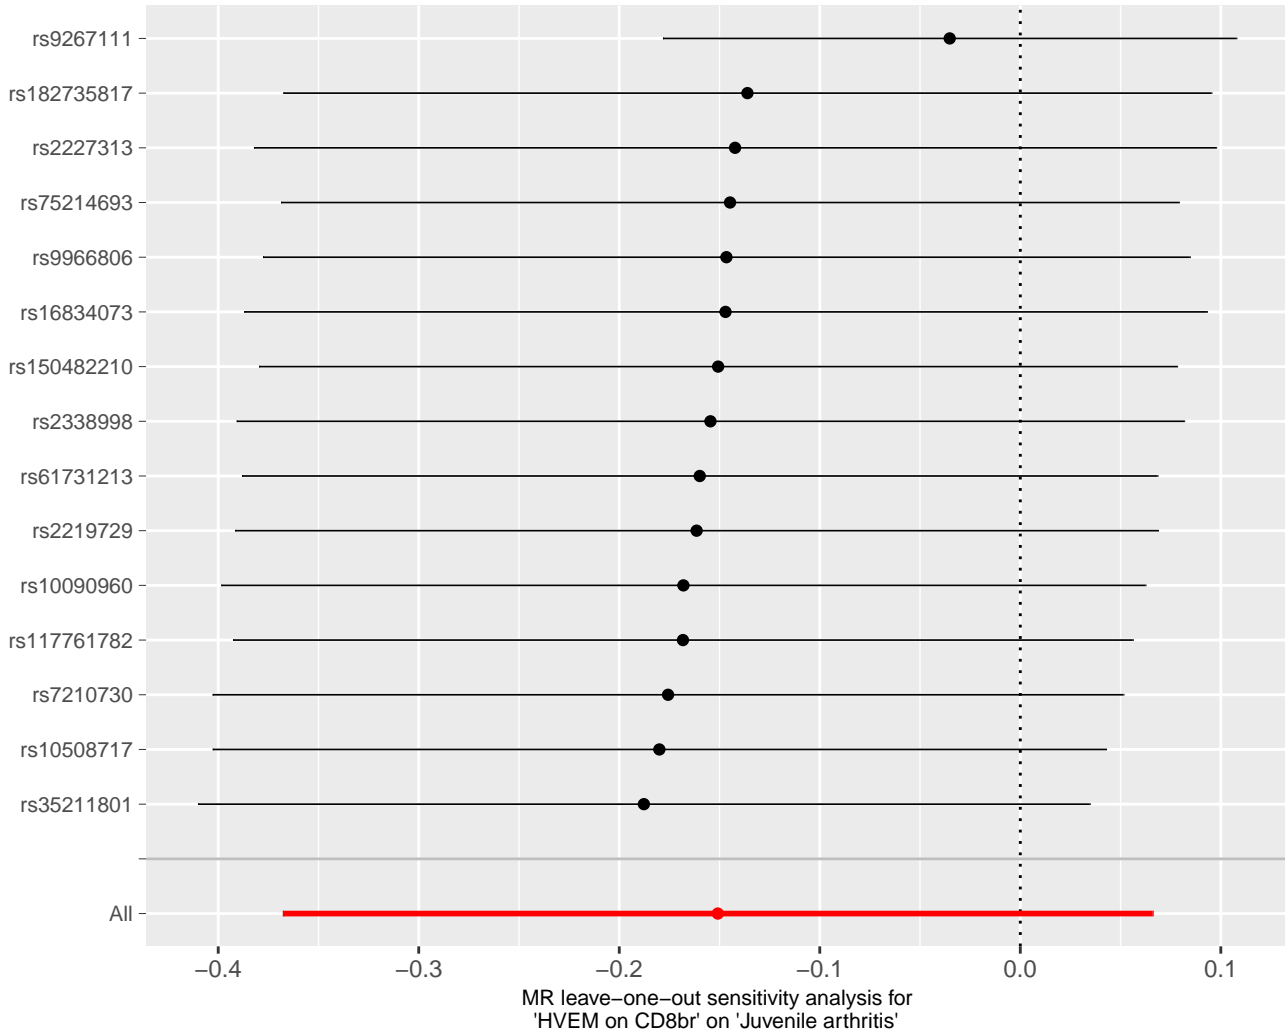



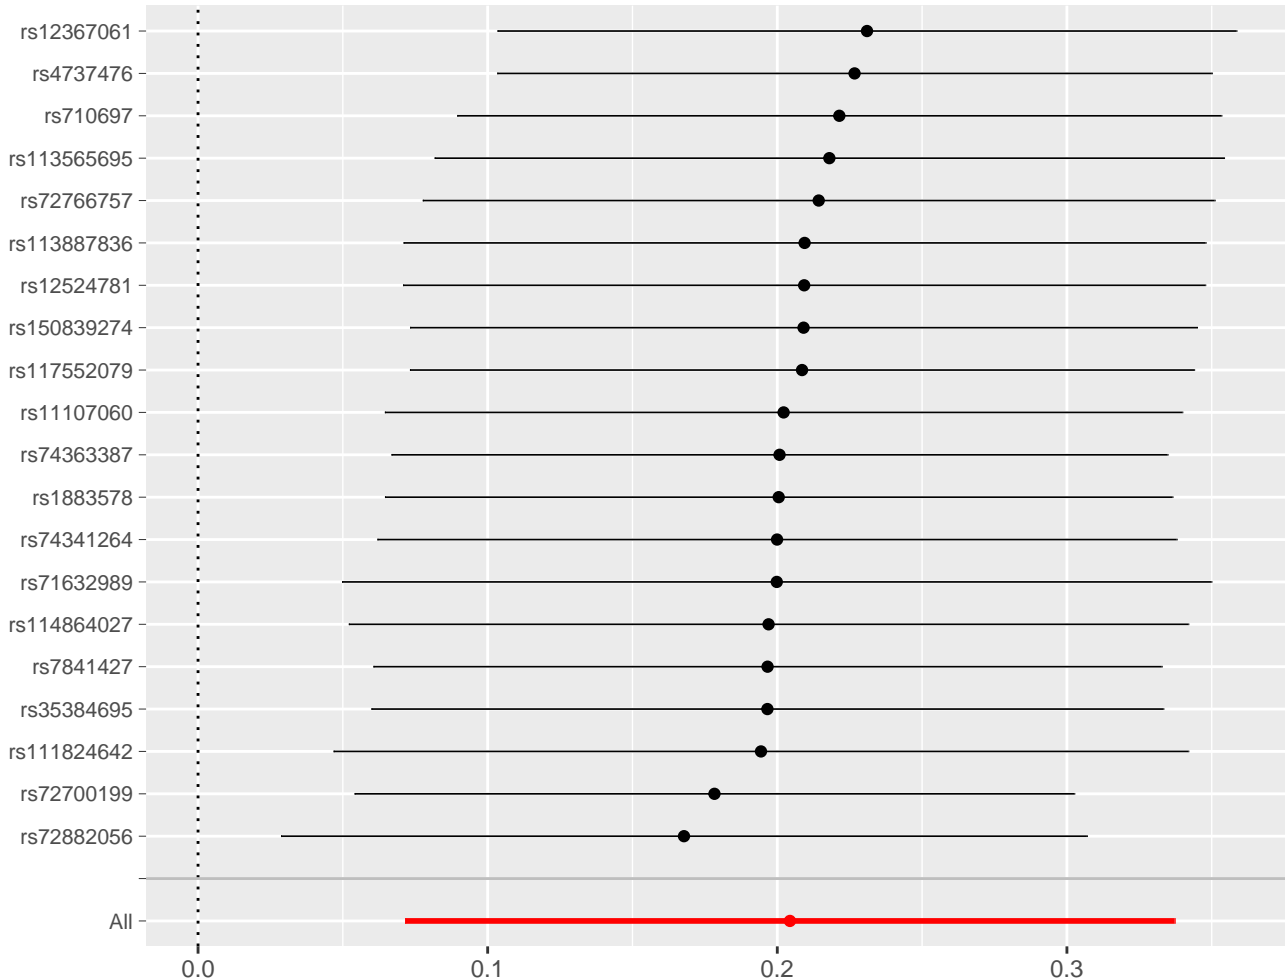

MR leave-one-out sensitivity analysis for 'PDL-1 on CD14- CD16+ monocyte' on 'Juvenile arthritis'

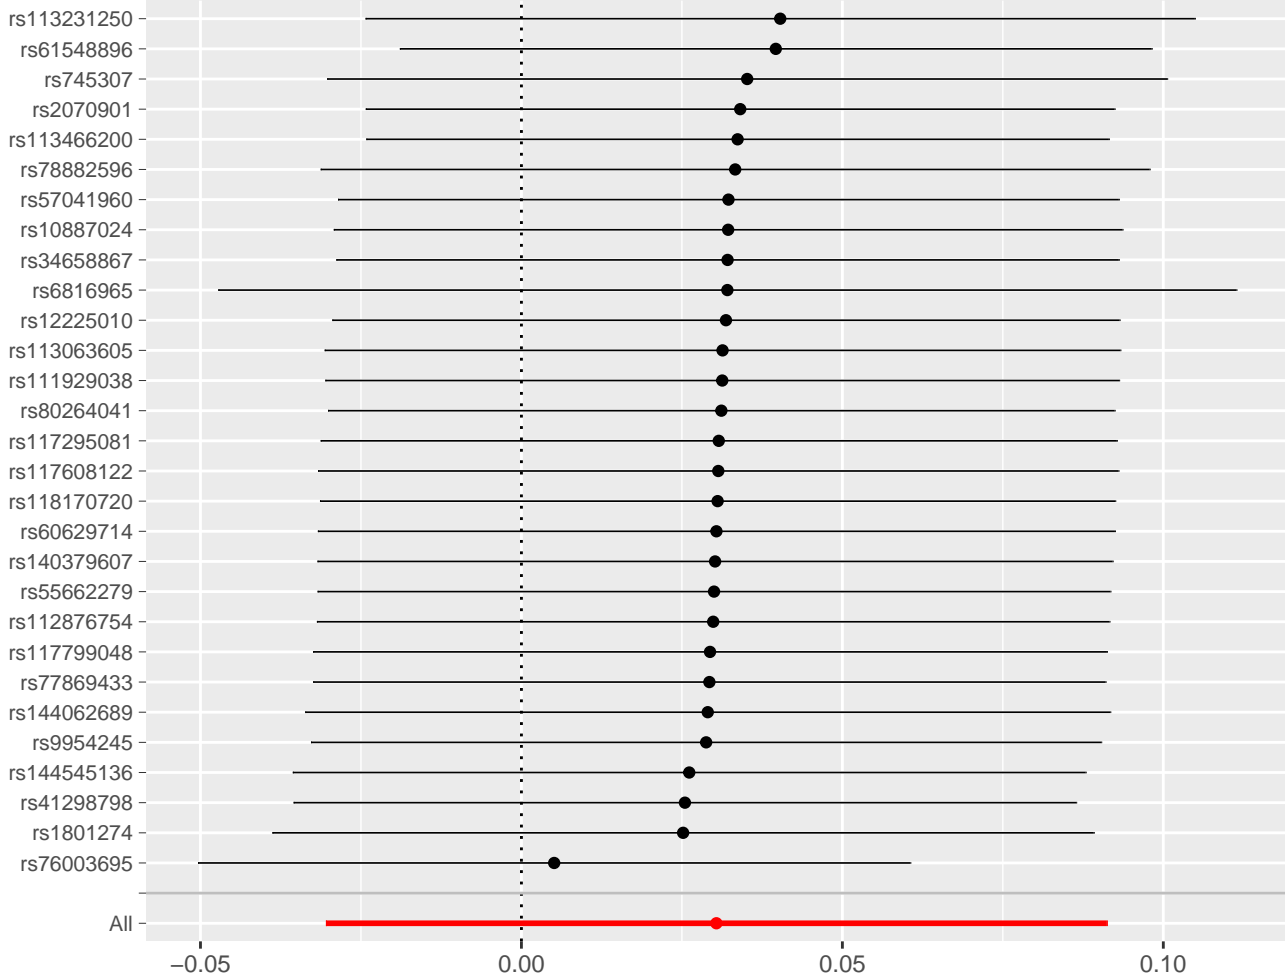

MR leave-one-out sensitivity analysis for 'CD40 on monocytes' on 'Juvenile arthritis'

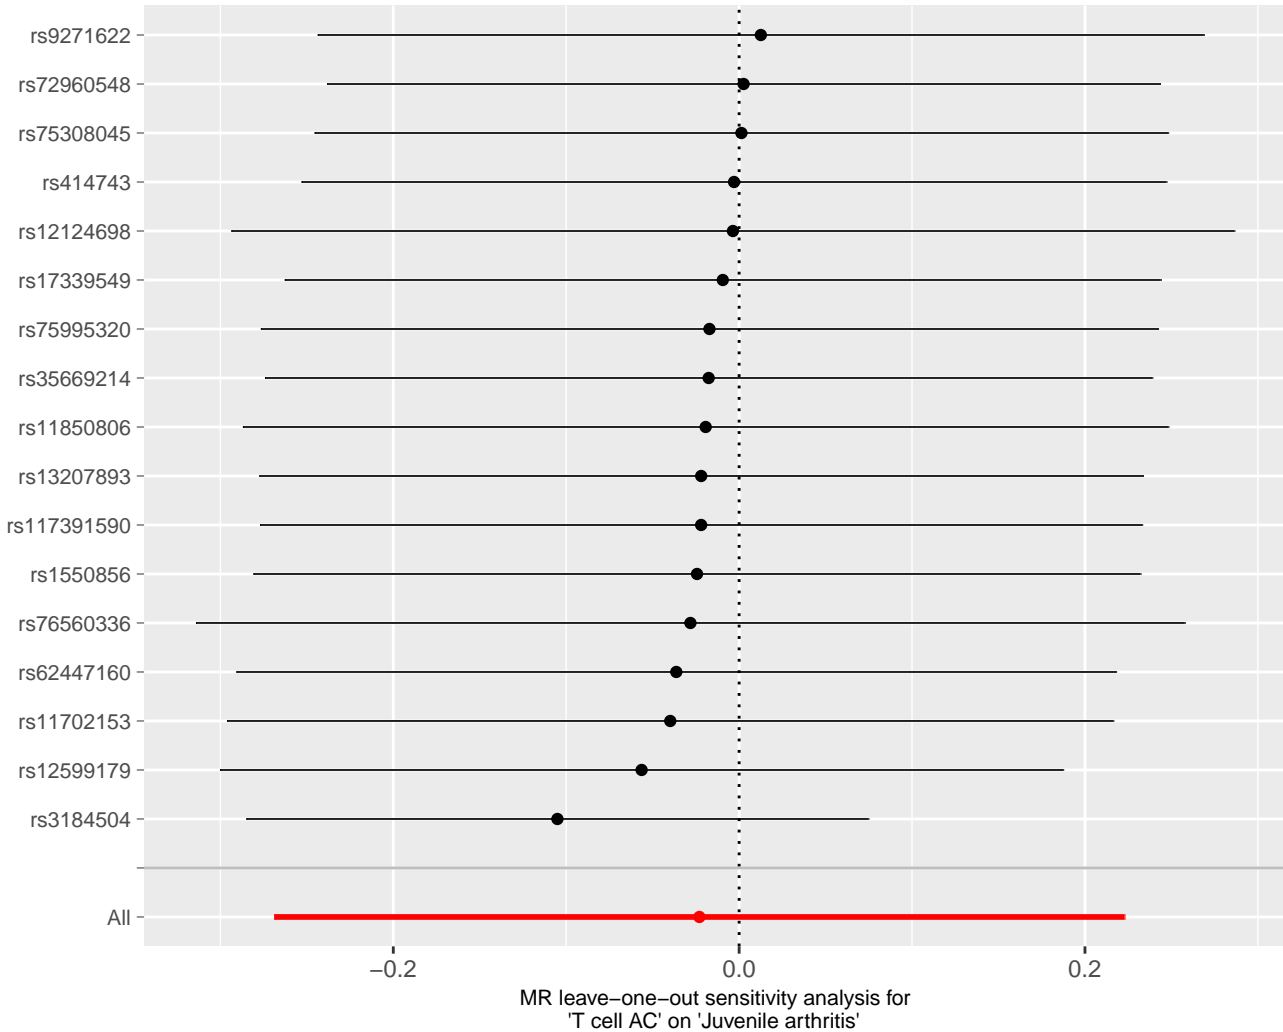

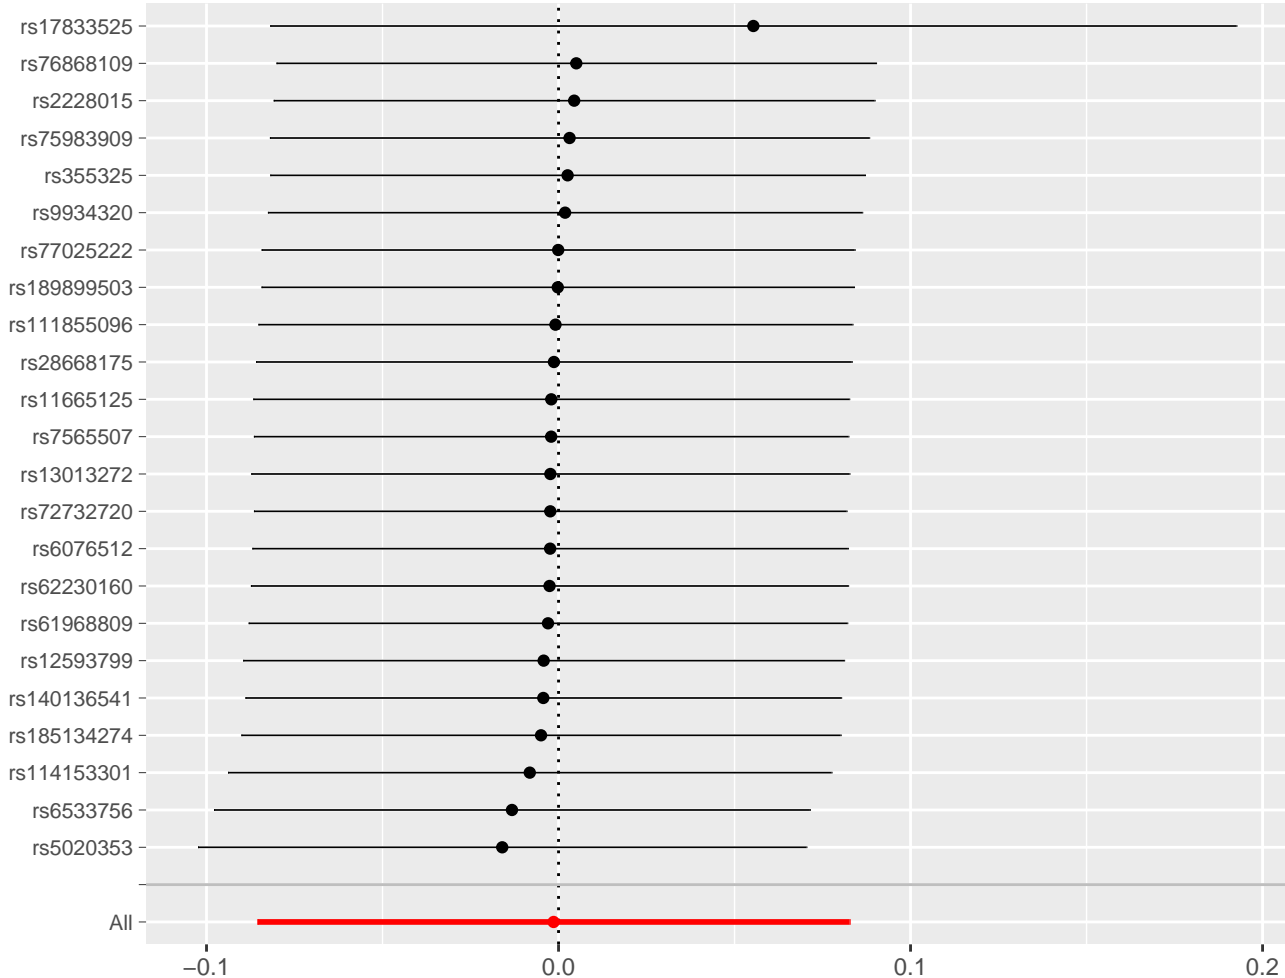

MR leave-one-out sensitivity analysis for 'CCR7 on naive CD4+' on 'Juvenile arthritis'

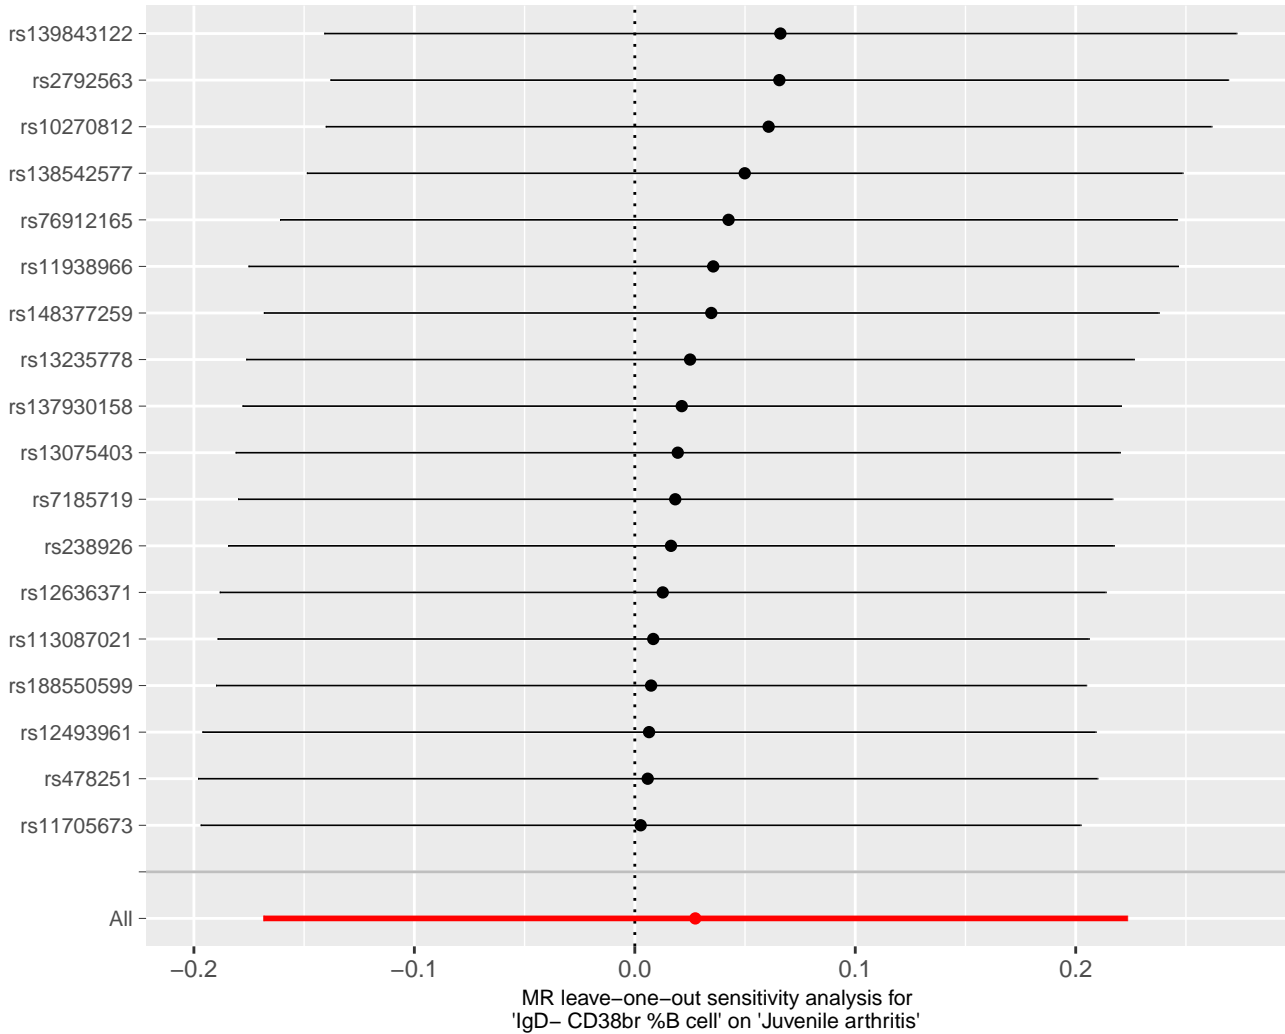

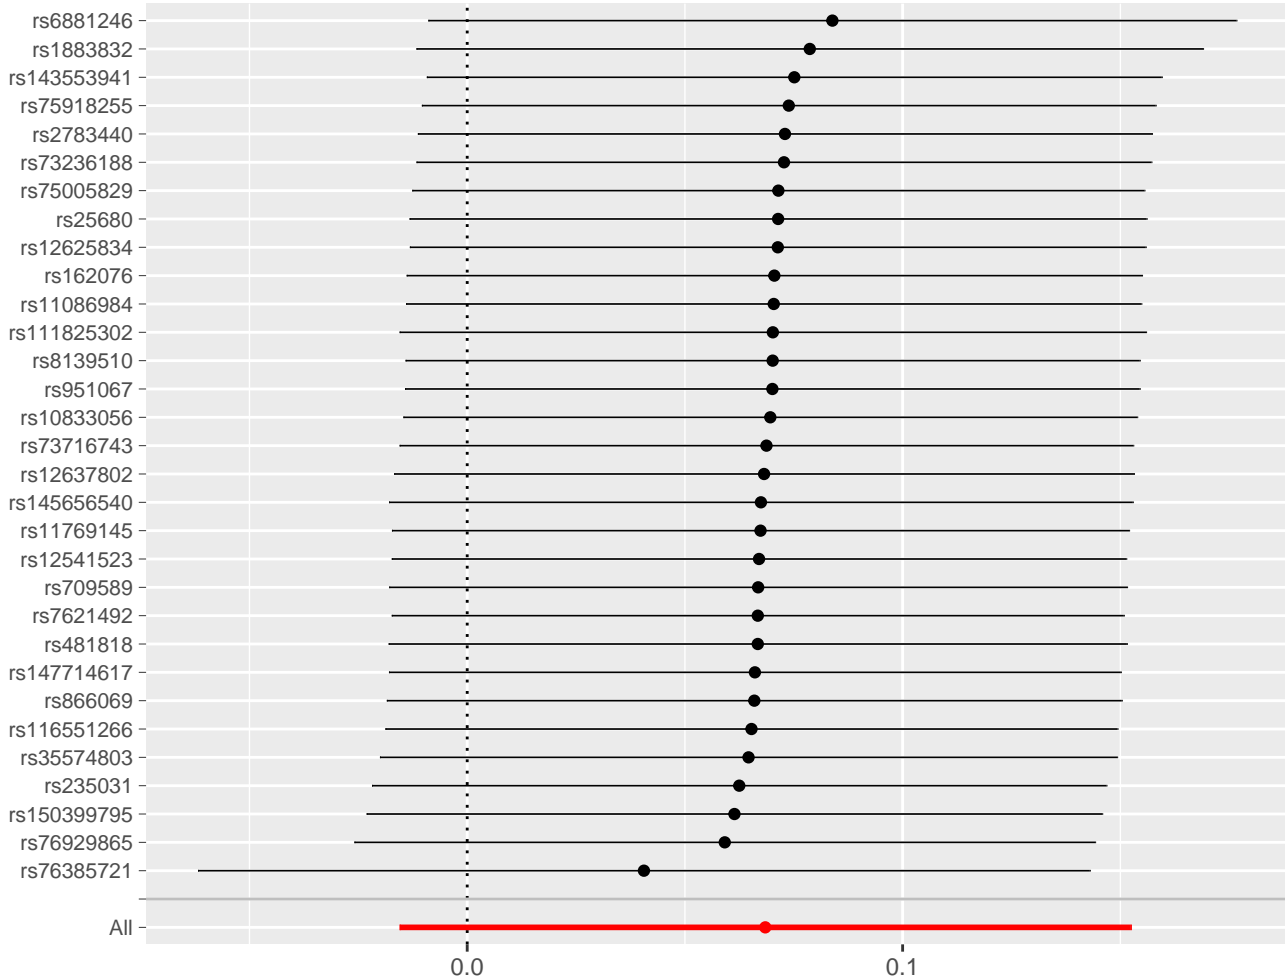

MR leave-one-out sensitivity analysis for 'CD27 on IgD+ CD24+' on 'Juvenile arthritis'

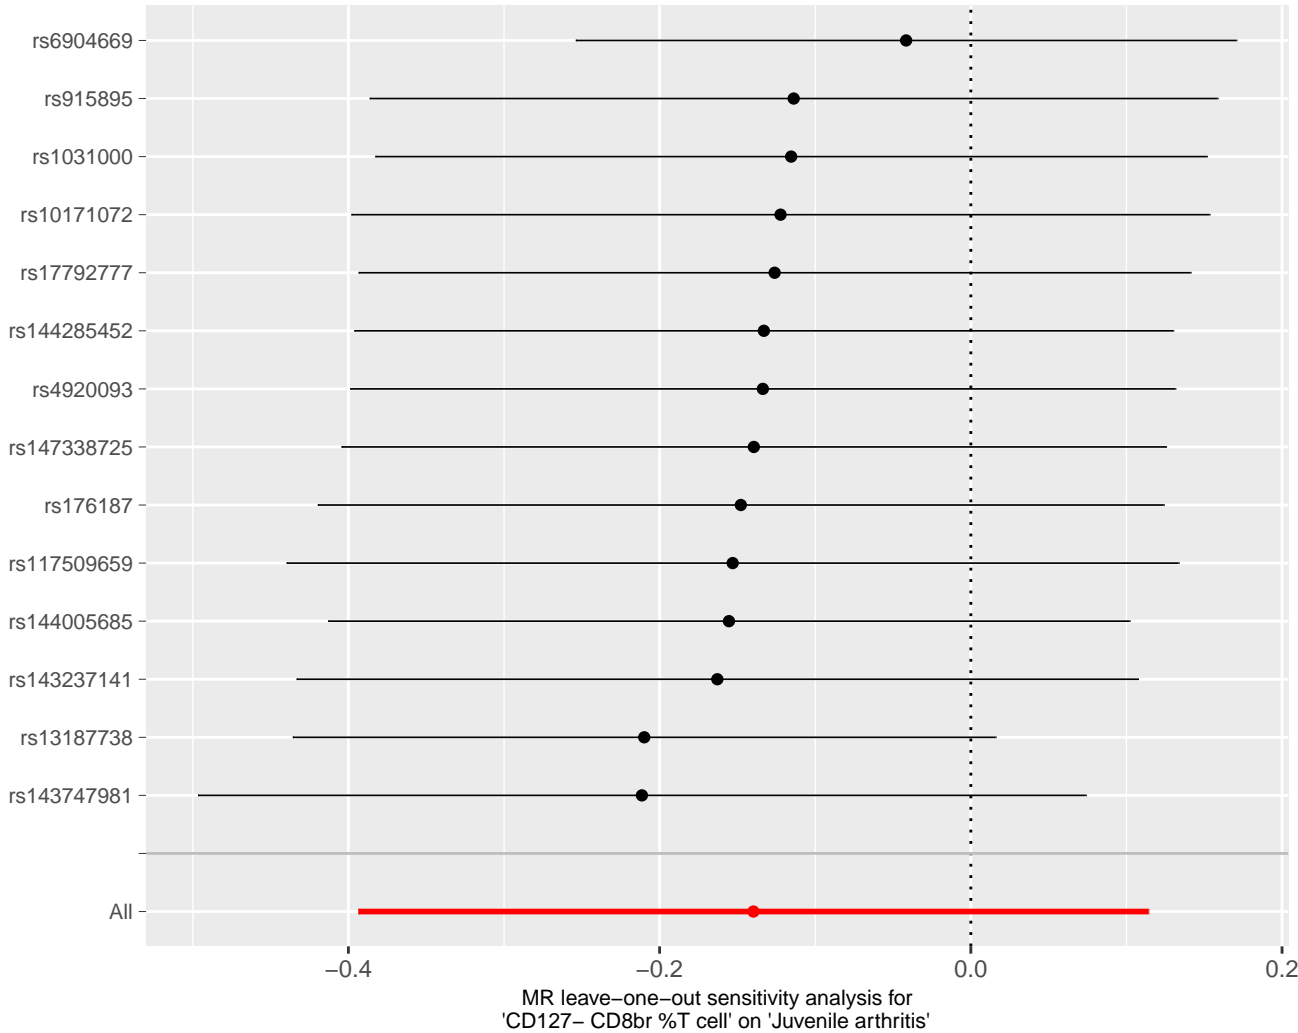

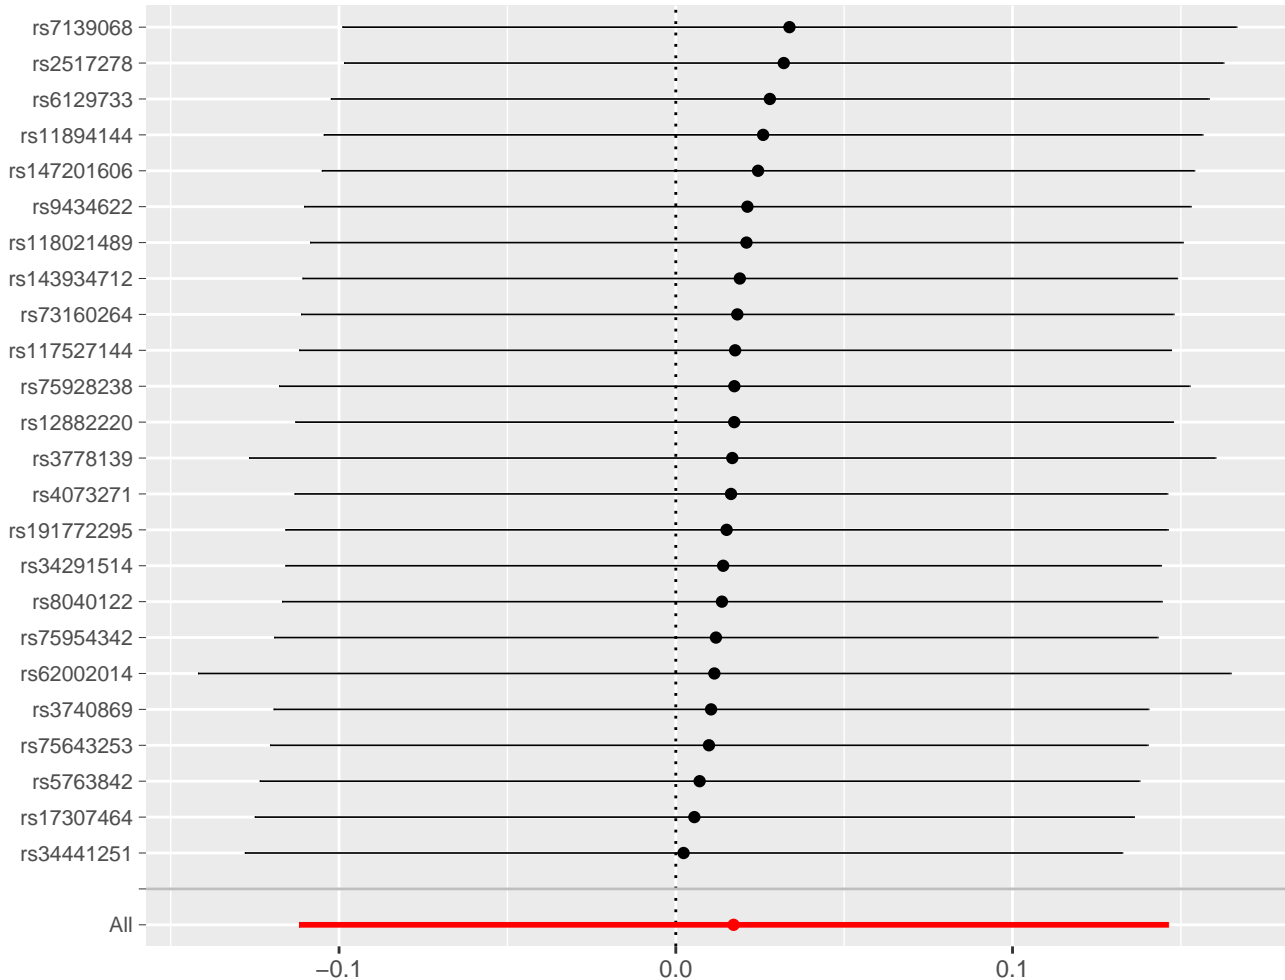

MR leave-one-out sensitivity analysis for 'CD45 on lymphocyte' on 'Juvenile arthritis'



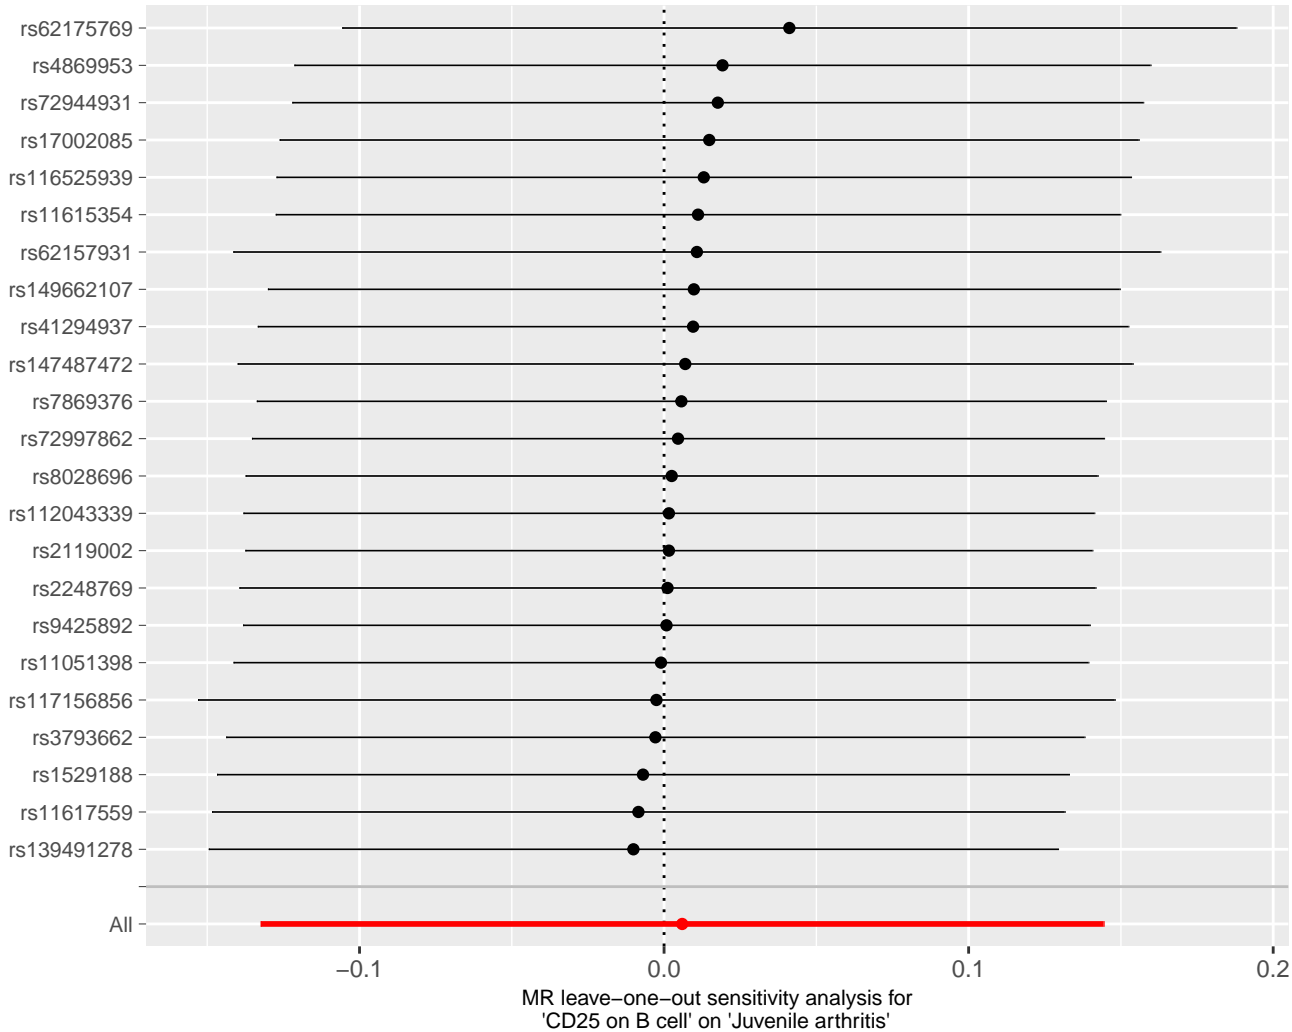

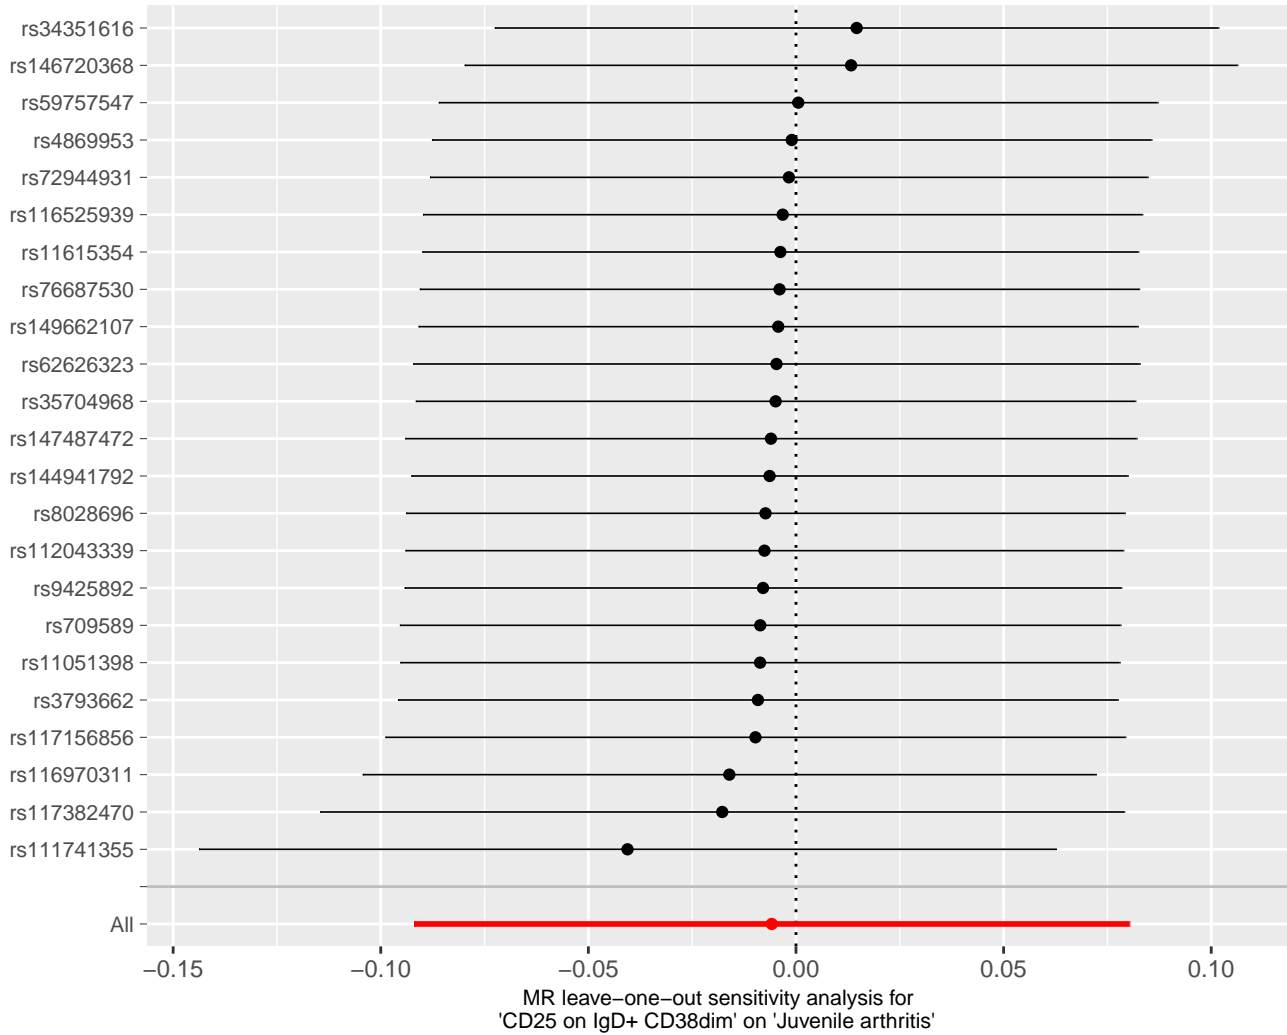

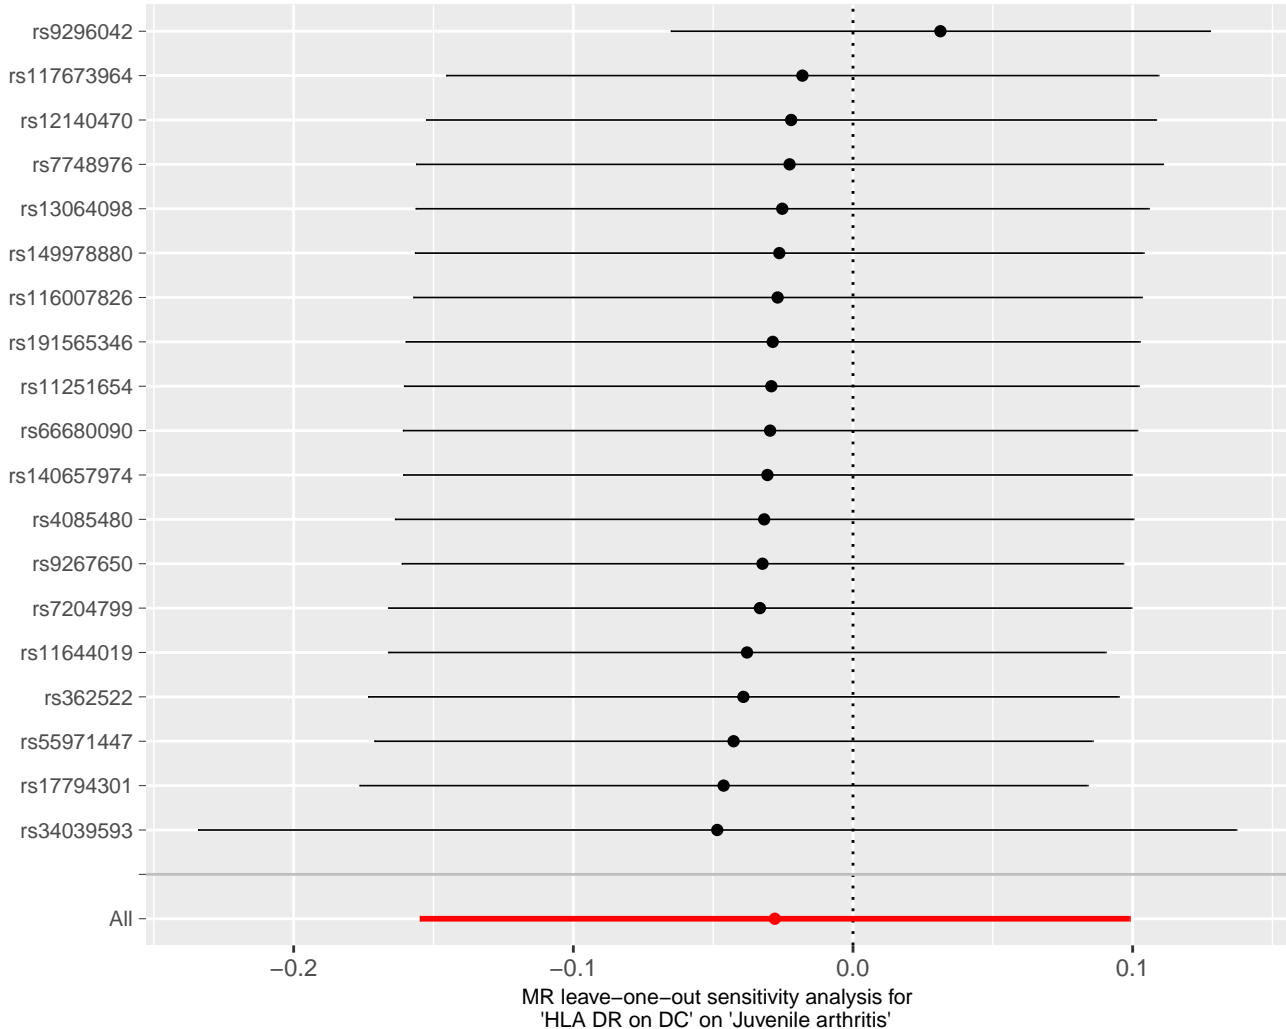

Supplement: 12969_2024_970_MOESM2_ESM.pdf [file 12969_2024_970_MOESM2_ESM.pdf]
